# Supplementary material for: A point mutation in the nucleotide exchange factor eIF2B constitutively activates the integrated stress response by allosteric modulation
Source: eLife. 2022 Apr 13;11:e76171. doi: 10.7554/eLife.76171 (PMC9132573; doi:10.7554/eLife.76171)
Supplement: Figure 1—source data 1. — Sed Coeff = sedimentation coefficient. [file elife-76171-fig1-data1.xlsx]

## Sheet: 1A-B
Sed Coeff	eIF2Bβγδε	eIF2Bβγδε + ISRIB	eIF2BβH160Dγδε	eIF2BβH160Dγδε + ISRIB
0	0.0138301	0.0196534	0.0113633	0.0111113
0.100503	3.50561	5.42963	2.63329	2.2139
0.201005	0.850834	1.72751	0.666165	0.38897
0.301508	0.136917	0.432175	0.133538	0.0500608
0.40201	0.0165523	0.0941309	0.0238164	0.00555344
0.502513	0.00166525	0.0190411	0.00404562	0.000587403
0.603015	0.000154214	0.00376981	0.000688882	6.42579e-05
0.703518	1.45529e-05	0.000766148	0.000122884	7.81857e-06
0.80402	1.54578e-06	0.000167272	2.38957e-05	1.13121e-06
0.904523	2.02692e-07	4.10075e-05	5.25188e-06	2.06405e-07
1.00503	3.55569e-08	1.1761e-05	1.34829e-06	4.9924e-08
1.10553	8.89355e-09	4.09982e-06	4.15928e-07	1.66167e-08
1.20603	3.28701e-09	1.79389e-06	1.57505e-07	7.78803e-09
1.30653	1.89735e-09	1.00941e-06	7.4354e-08	5.179e-09
1.40704	1.60204e-09	7.40998e-07	4.40895e-08	4.85062e-09
1.50754	2.10366e-09	7.11865e-07	3.28542e-08	6.25332e-09
1.60804	3.86977e-09	8.78582e-07	3.05571e-08	1.07097e-08
1.70854	9.90487e-09	1.34672e-06	3.50175e-08	2.3304e-08
1.80905	3.20711e-08	2.65495e-06	4.85525e-08	6.11437e-08
1.90955	1.27357e-07	6.16915e-06	7.96955e-08	1.83055e-07
2.01005	5.71449e-07	1.59022e-05	1.50861e-07	5.92909e-07
2.11055	2.67456e-06	4.3228e-05	3.20397e-07	1.75589e-06
2.21106	1.25062e-05	0.000120508	7.21736e-07	5.42026e-06
2.31156	5.49475e-05	0.000335824	1.74165e-06	1.65979e-05
2.41206	0.000218176	0.000905471	4.36083e-06	4.5596e-05
2.51256	0.000758633	0.00221644	1.07568e-05	0.000110962
2.61307	0.00222323	0.00491575	2.49989e-05	0.000240739
2.71357	0.00548686	0.00952293	5.85528e-05	0.000467322
2.81407	0.0116014	0.0160944	0.000133279	0.000813549
2.91457	0.0207773	0.0252138	0.000289912	0.00131444
3.01508	0.0317484	0.0363099	0.000592654	0.00192289
3.11558	0.042302	0.0472965	0.00112853	0.00254528
3.21608	0.0510336	0.0560147	0.00194286	0.0030785
3.31658	0.0566101	0.0609767	0.00301353	0.00375019
3.41709	0.0585084	0.0638158	0.00433432	0.00457833
3.51759	0.0576532	0.0653952	0.00615443	0.0056906
3.61809	0.0553684	0.0656567	0.00833232	0.00709139
3.71859	0.0528783	0.0646408	0.0107495	0.00891162
3.8191	0.0505443	0.0628428	0.0138741	0.0108442
3.9196	0.0486716	0.0604639	0.0176478	0.0129145
4.0201	0.0474762	0.0583191	0.0219079	0.0145941
4.1206	0.0470428	0.0565747	0.0264474	0.0164037
4.22111	0.0475196	0.0557583	0.0307438	0.0184709
4.32161	0.0485662	0.0553439	0.0332608	0.0207228
4.42211	0.0502326	0.0552823	0.0344725	0.0235458
4.52261	0.0523126	0.0552448	0.0350641	0.0264408
4.62312	0.0545913	0.0553842	0.0354702	0.0290893
4.72362	0.0568775	0.055431	0.0356508	0.0315477
4.82412	0.0590201	0.0559002	0.0355287	0.0333284
4.92462	0.0608004	0.0563968	0.0351824	0.0343033
5.02513	0.06211	0.0568415	0.0344582	0.0348588
5.12563	0.0628266	0.0571509	0.0333593	0.0345837
5.22613	0.062874	0.0574181	0.0321834	0.0339195
5.32663	0.0623757	0.0574271	0.0305929	0.0326361
5.42714	0.061459	0.0573691	0.0291127	0.0314473
5.52764	0.0602453	0.0572114	0.0275173	0.0303601
5.62814	0.0589045	0.0570504	0.0261335	0.0294087
5.72864	0.0575638	0.0568354	0.0248516	0.0288468
5.82915	0.0564246	0.0566273	0.0241226	0.0285781
5.92965	0.0556553	0.0564227	0.0238823	0.0286804
6.03015	0.0553658	0.0562747	0.0242863	0.0292208
6.13065	0.0557511	0.0562477	0.0252345	0.0303348
6.23116	0.0568778	0.0562657	0.026969	0.0320444
6.33166	0.058952	0.0564681	0.0295505	0.0345603
6.43216	0.0621575	0.0567666	0.0333378	0.0381919
6.53266	0.066704	0.0572085	0.0384907	0.0430198
6.63317	0.0730128	0.0577642	0.0457098	0.0495961
6.73367	0.0813745	0.0584768	0.055527	0.0588317
6.83417	0.0924617	0.059228	0.0689397	0.0711683
6.93467	0.10683	0.0600264	0.0871447	0.0879617
7.03518	0.125321	0.0607956	0.111344	0.110343
7.13568	0.148716	0.0615557	0.143993	0.139825
7.23618	0.178692	0.0622234	0.187307	0.179144
7.33668	0.215905	0.0627596	0.24351	0.229464
7.43719	0.262372	0.0630884	0.314409	0.293844
7.53769	0.318952	0.063299	0.400506	0.372959
7.63819	0.385451	0.0632047	0.500689	0.46644
7.73869	0.46215	0.0629368	0.611256	0.571758
7.8392	0.547587	0.0624499	0.724537	0.682889
7.9397	0.639072	0.0617189	0.830576	0.792814
8.0402	0.730696	0.0607992	0.918409	0.889142
8.1407	0.818924	0.0598024	0.977544	0.96206
8.24121	0.89597	0.0586313	1	0.999947
8.34171	0.954846	0.0574192	0.982173	1
8.44221	0.99074	0.0561815	0.929442	0.959068
8.54271	1	0.0549902	0.846617	0.88566
8.64322	0.982602	0.0538717	0.746059	0.786683
8.74372	0.939484	0.0528883	0.635393	0.67386
8.84422	0.875246	0.0520744	0.525688	0.560991
8.94472	0.796164	0.0515022	0.425847	0.454006
9.04523	0.70816	0.0511871	0.339152	0.360097
9.14573	0.617383	0.0511871	0.266737	0.280373
9.24623	0.527909	0.051553	0.207232	0.215543
9.34673	0.444324	0.0523308	0.160465	0.164363
9.44724	0.370162	0.0535937	0.124155	0.1252
9.54774	0.305297	0.0554029	0.0965171	0.0955407
9.64824	0.249612	0.0578272	0.0757347	0.0732491
9.74874	0.20352	0.0610386	0.0600605	0.0567635
9.84925	0.164939	0.0650909	0.0482874	0.044501
9.94975	0.133945	0.0702038	0.039516	0.0353785
10.0503	0.108976	0.0763401	0.0329005	0.0286058
10.1508	0.0889722	0.0840741	0.0279679	0.0235403
10.2513	0.0730117	0.0934626	0.0242602	0.0197326
10.3518	0.0603571	0.104603	0.0214972	0.0168492
10.4523	0.0502882	0.118379	0.0194528	0.0146639
10.5528	0.0422376	0.134771	0.0179776	0.0130039
10.6533	0.0359262	0.154202	0.0169414	0.0117366
10.7538	0.0308673	0.17777	0.0162676	0.0107648
10.8543	0.0267704	0.205783	0.0158907	0.0100326
10.9548	0.0235512	0.238432	0.0157624	0.00948644
11.0553	0.0209755	0.276566	0.0158736	0.00909726
11.1558	0.0188884	0.320936	0.0161734	0.00882459
11.2563	0.0171732	0.371752	0.0166429	0.00865397
11.3568	0.0158275	0.428455	0.0172701	0.00856141
11.4573	0.0147615	0.49061	0.0179991	0.0085349
11.5578	0.0138868	0.558901	0.0188915	0.00856782
11.6583	0.0131761	0.630949	0.0198652	0.008658
11.7588	0.0126275	0.704382	0.0209253	0.00877791
11.8593	0.0122144	0.775036	0.0219644	0.00892063
11.9598	0.0118908	0.843215	0.0230504	0.00909438
12.0603	0.0116326	0.903509	0.024123	0.00929083
12.1608	0.0114237	0.952541	0.0251609	0.00949145
12.2613	0.0112945	0.986219	0.0260178	0.00968052
12.3618	0.0111946	1	0.026826	0.00988404
12.4623	0.0111204	0.99968	0.0274973	0.0100843
12.5628	0.0110265	0.97938	0.0279947	0.0102751
12.6633	0.0109827	0.942112	0.0283084	0.010413
12.7638	0.0109477	0.888913	0.0283523	0.0105892
12.8643	0.0108919	0.822286	0.0283284	0.0107415
12.9648	0.0108306	0.751567	0.0281369	0.0108695
13.0653	0.0107567	0.674979	0.0277711	0.0109837
13.1658	0.0106403	0.597973	0.0272706	0.0110818
13.2663	0.0105505	0.524007	0.0266596	0.0111337
13.3668	0.0104366	0.453497	0.0258623	0.0112207
13.4673	0.010323	0.388454	0.0251273	0.0112878
13.5678	0.0101934	0.331404	0.0243247	0.0113553
13.6683	0.01006	0.281457	0.0234825	0.0114126
13.7688	0.00989205	0.238258	0.0226471	0.011471
13.8693	0.00977583	0.201309	0.0218045	0.0114883
13.9698	0.00965347	0.170111	0.0209684	0.0115659
14.0704	0.00954476	0.14344	0.020112	0.0116443
14.1709	0.009445	0.121963	0.0193534	0.0117306
14.2714	0.0093619	0.10405	0.0186233	0.0118229
14.3719	0.00929552	0.0892165	0.0179256	0.0119267
14.4724	0.00922473	0.0769202	0.0172546	0.0120359
14.5729	0.00921524	0.0667586	0.0166158	0.0121097
14.6734	0.00921777	0.0582859	0.0159297	0.0122671
14.7739	0.00925375	0.0510189	0.0153752	0.0124222
14.8744	0.00930851	0.0452665	0.014845	0.0125841
14.9749	0.00939522	0.0404025	0.0143255	0.0127605
15.0754	0.00945246	0.0363174	0.0138337	0.0129369
15.1759	0.00960972	0.0328677	0.0133617	0.0131269
15.2764	0.00979069	0.0299237	0.0129076	0.0132385
15.3769	0.0100046	0.0274162	0.0123773	0.0134483
15.4774	0.0102366	0.0252848	0.0120004	0.0136577
15.5779	0.010496	0.0232801	0.0116431	0.0138597
15.6784	0.0107912	0.0217572	0.0112939	0.0140505
15.7789	0.0111008	0.0204282	0.0109692	0.0142329
15.8794	0.0114458	0.0192744	0.0106783	0.0143918
15.9799	0.0117464	0.0182695	0.0104067	0.0145491
16.0804	0.0121466	0.0174031	0.0101665	0.0146827
16.1809	0.0125754	0.016658	0.00996069	0.0146832
16.2814	0.0130107	0.0160162	0.00978442	0.0148092
16.3819	0.0134579	0.0154736	0.00958099	0.014904
16.4824	0.0139244	0.014901	0.00950154	0.014972
16.5829	0.0143778	0.0145672	0.00945349	0.0150051
16.6834	0.0148497	0.0143085	0.00943794	0.0150283
16.7839	0.0153042	0.0141068	0.00945639	0.0150158
16.8844	0.0156319	0.0139801	0.00951796	0.0149831
16.9849	0.0161118	0.0139103	0.00961648	0.0149468
17.0854	0.0165712	0.0139141	0.0097539	0.0149074
17.1859	0.0170065	0.0139841	0.00993485	0.0147006
17.2864	0.0174097	0.0141272	0.0101607	0.0146941
17.3869	0.0177943	0.0143453	0.0103541	0.0146927
17.4874	0.0181387	0.0144763	0.0106916	0.0146888
17.5879	0.0184613	0.0148977	0.0110758	0.0147024
17.6884	0.018749	0.0153933	0.011507	0.014734
17.7889	0.0190116	0.0159757	0.0119969	0.0148012
17.8894	0.0189481	0.0166503	0.0125441	0.0149
17.99	0.0192363	0.0174273	0.0131587	0.0150431
18.0905	0.0194677	0.0183206	0.0138482	0.0152374
18.191	0.019688	0.0193365	0.0146172	0.0154886
18.2915	0.0198636	0.0204873	0.0154838	0.0155546
18.392	0.0200391	0.0217826	0.0164569	0.0159844
18.4925	0.0201811	0.0232339	0.0173412	0.0164704
18.593	0.020332	0.0248503	0.0186139	0.0170186
18.6935	0.0204739	0.0262387	0.0200534	0.0176304
18.794	0.0206329	0.0283207	0.0216607	0.0183249
18.8945	0.0207982	0.0305769	0.0234847	0.0190938
18.995	0.0209799	0.0330476	0.025552	0.0199492
19.0955	0.0206272	0.0357111	0.0278957	0.0208913
19.196	0.0210194	0.0386002	0.0305808	0.021914
19.2965	0.0213965	0.0417097	0.0336431	0.0230368
19.397	0.02182	0.0450602	0.0371571	0.0242452
19.4975	0.0222581	0.0486336	0.0411886	0.0255423
19.598	0.0227562	0.0524655	0.0458225	0.0263006
19.6985	0.0232971	0.0565297	0.0511432	0.0279148
19.799	0.0239072	0.0608377	0.0572844	0.0295873
19.8995	0.0245991	0.0653862	0.0635463	0.0313429
20	0.0507688	0.140347	0.143711	0.06631

## Sheet: 1C-D
Sed Coeff	eIF2Bβγδε	eIF2Bβγδε + α2	eIF2BβH160Dγδε	eIF2BβH160Dγδε + α2
0	0.0136321	0.0182265	0.0104671	0.0179965
0.100503	3.58427	3.59864	2.64021	3.80634
0.201005	1.16587	0.972038	0.899727	0.992355
0.301508	0.293184	0.234049	0.27254	0.217586
0.40201	0.0622768	0.0547557	0.0807163	0.0451918
0.502513	0.0119852	0.0132247	0.0248824	0.00968346
0.603015	0.00222565	0.00346545	0.00834874	0.00228889
0.703518	0.000422576	0.00102754	0.00314462	0.000628579
0.80402	8.64407e-05	0.000356934	0.00135559	0.000208238
0.904523	1.99408e-05	0.000149234	0.000675419	8.5218e-05
1.00503	5.38851e-06	7.65165e-05	0.000389086	4.35796e-05
1.10553	1.75634e-06	4.85967e-05	0.000258189	2.7842e-05
1.20603	7.04935e-07	3.82749e-05	0.00019537	2.20123e-05
1.30653	3.52487e-07	3.71039e-05	0.000166477	2.11795e-05
1.40704	2.20351e-07	4.36054e-05	0.000157516	2.42664e-05
1.50754	1.7015e-07	6.07853e-05	0.000163012	3.22784e-05
1.60804	1.60438e-07	9.78451e-05	0.000182312	4.86429e-05
1.70854	1.85666e-07	0.000176434	0.000216298	8.08867e-05
1.80905	2.56768e-07	0.000345358	0.000266341	0.00014485
1.90955	4.09025e-07	0.00070963	0.000347982	0.000273548
2.01005	7.39413e-07	0.0014839	0.000472627	0.000532737
2.11055	1.45316e-06	0.00307473	0.000654525	0.00105214
2.21106	3.1723e-06	0.00604464	0.000933981	0.00209271
2.31156	7.53286e-06	0.0112017	0.00133083	0.00396579
2.41206	1.81533e-05	0.0198995	0.00195495	0.00721905
2.51256	4.32105e-05	0.0322296	0.00289986	0.0125814
2.61307	0.000103521	0.048046	0.00415337	0.0216924
2.71357	0.000245483	0.0660577	0.00588425	0.0348407
2.81407	0.000551798	0.0854723	0.00837084	0.0516061
2.91457	0.00118084	0.102466	0.0114602	0.0716355
3.01508	0.00236222	0.115594	0.0148589	0.0943744
3.11558	0.00428735	0.124006	0.0186159	0.116686
3.21608	0.0071178	0.128844	0.0226658	0.134442
3.31658	0.0109398	0.130129	0.0261201	0.14595
3.41709	0.0155503	0.127853	0.028755	0.150572
3.51759	0.0205691	0.12332	0.0304324	0.149201
3.61809	0.0253623	0.118199	0.031264	0.143291
3.71859	0.0293095	0.113193	0.0311845	0.134186
3.8191	0.0322023	0.107889	0.030358	0.123323
3.9196	0.0342845	0.102408	0.0291309	0.11299
4.0201	0.0356838	0.0972448	0.0277815	0.103576
4.1206	0.0367257	0.0931738	0.0264655	0.0954477
4.22111	0.0375452	0.0900461	0.0252563	0.0889554
4.32161	0.0382145	0.0876514	0.0243192	0.0836695
4.42211	0.0389323	0.085937	0.0236765	0.0800736
4.52261	0.0395864	0.08512	0.0233583	0.0777314
4.62312	0.0405671	0.085214	0.0233384	0.0764488
4.72362	0.0418222	0.0862543	0.0236248	0.075847
4.82412	0.0433029	0.0879775	0.024163	0.0758701
4.92462	0.0447252	0.0901996	0.0248912	0.0761984
5.02513	0.0459668	0.0926484	0.0257318	0.0766791
5.12563	0.0470678	0.0953296	0.0266064	0.0769536
5.22613	0.0478316	0.0978374	0.0274023	0.0769669
5.32663	0.0483564	0.099961	0.0280505	0.0765821
5.42714	0.0486343	0.101495	0.0284256	0.0757568
5.52764	0.0485553	0.102062	0.028485	0.0743692
5.62814	0.0481505	0.101827	0.0282137	0.0725313
5.72864	0.0475566	0.100604	0.0276446	0.0704241
5.82915	0.046819	0.0984149	0.0268556	0.0679884
5.92965	0.0461272	0.0954706	0.0259632	0.0654957
6.03015	0.0456015	0.0919177	0.0250732	0.0629271
6.13065	0.0453971	0.0879342	0.0243037	0.0604435
6.23116	0.0455861	0.0836004	0.0238253	0.0581104
6.33166	0.0463592	0.0792293	0.0237035	0.0560201
6.43216	0.0478606	0.0748856	0.024081	0.0541511
6.53266	0.0502479	0.0706031	0.0251142	0.0525609
6.63317	0.0537818	0.0665595	0.0268999	0.0512414
6.73367	0.0587398	0.0627198	0.0297117	0.0502323
6.83417	0.0653939	0.0591735	0.033909	0.0495286
6.93467	0.0743714	0.0558677	0.0399028	0.0490846
7.03518	0.086105	0.0529083	0.0483608	0.0489229
7.13568	0.101587	0.0502328	0.0601575	0.0490087
7.23618	0.121468	0.0478632	0.0765661	0.0493734
7.33668	0.147281	0.0457612	0.0988865	0.0499845
7.43719	0.179585	0.0439306	0.129735	0.0508
7.53769	0.220662	0.0423666	0.171291	0.0518461
7.63819	0.271085	0.0410435	0.225469	0.053034
7.73869	0.332078	0.0399258	0.294987	0.054417
7.8392	0.403436	0.0390239	0.380481	0.0558002
7.9397	0.484854	0.0382524	0.480967	0.0572383
8.0402	0.574488	0.0376968	0.592217	0.0587353
8.1407	0.668026	0.0372506	0.708338	0.060097
8.24121	0.760819	0.0368747	0.818882	0.061235
8.34171	0.84685	0.0365247	0.911839	0.0621516
8.44221	0.919296	0.0362006	0.976145	0.0628057
8.54271	0.97166	0.0359477	1	0.0630524
8.64322	0.999273	0.0355482	0.981561	0.062761
8.74372	1	0.0351737	0.92131	0.0620952
8.84422	0.973686	0.0347007	0.830374	0.0609117
8.94472	0.92342	0.0341525	0.718911	0.0593665
9.04523	0.853899	0.0334923	0.599118	0.0572806
9.14573	0.770123	0.0327274	0.481801	0.0548454
9.24623	0.679152	0.0318916	0.375781	0.0520904
9.34673	0.587027	0.0309911	0.285471	0.0491368
9.44724	0.498285	0.03004	0.212212	0.0460894
9.54774	0.416212	0.0290261	0.154977	0.0430339
9.64824	0.343319	0.0279965	0.111823	0.0399064
9.74874	0.28013	0.0269734	0.08015	0.0369757
9.84925	0.226042	0.0259561	0.0572938	0.0341518
9.94975	0.182225	0.0249432	0.0409975	0.031655
10.0503	0.146144	0.0239835	0.0295371	0.0292881
10.1508	0.117443	0.0230469	0.0214663	0.0271334
10.2513	0.0944208	0.0221898	0.015823	0.0252589
10.3518	0.0764095	0.0213354	0.0118706	0.0236752
10.4523	0.0622525	0.0205727	0.00906954	0.0223368
10.5528	0.0511229	0.0198146	0.00707376	0.0212179
10.6533	0.0424944	0.0191638	0.00564656	0.0203442
10.7538	0.0356885	0.0185559	0.00461471	0.019723
10.8543	0.0304361	0.017996	0.00386551	0.0192886
10.9548	0.0263447	0.0175481	0.00332128	0.0191286
11.0553	0.0231361	0.0171753	0.00292309	0.0191612
11.1558	0.0206683	0.0168689	0.00263421	0.0194662
11.2563	0.0187568	0.0167079	0.00243185	0.0200525
11.3568	0.0172738	0.0166556	0.00229598	0.0208952
11.4573	0.0161935	0.0167849	0.00221551	0.0221191
11.5578	0.0153863	0.0170645	0.00217821	0.0237112
11.6583	0.0148186	0.017537	0.00217775	0.0257594
11.7588	0.0144758	0.0182838	0.0022167	0.0284204
11.8593	0.0142882	0.0193255	0.002286	0.031741
11.9598	0.0142629	0.0207342	0.00238456	0.0358457
12.0603	0.014357	0.0225776	0.00251605	0.041059
12.1608	0.0145567	0.0249575	0.00267568	0.0474937
12.2613	0.0148183	0.028013	0.00286421	0.0555675
12.3618	0.0151787	0.031977	0.00308388	0.0656043
12.4623	0.0155713	0.0370863	0.00332971	0.0782245
12.5628	0.0159597	0.0435505	0.00359736	0.0937198
12.6633	0.0163831	0.0517589	0.00388978	0.112727
12.7638	0.016785	0.0623294	0.00420017	0.136489
12.8643	0.0171416	0.0756434	0.00453241	0.165467
12.9648	0.0174234	0.0926504	0.00487414	0.200508
13.0653	0.0176803	0.113827	0.00521255	0.24205
13.1658	0.0178525	0.140346	0.00556171	0.291886
13.2663	0.0179288	0.173397	0.00589817	0.349671
13.3668	0.017897	0.213482	0.00622066	0.414971
13.4673	0.0177994	0.261267	0.00651853	0.487386
13.5678	0.0176093	0.318389	0.00679823	0.565681
13.6683	0.0173388	0.384034	0.00704	0.647766
13.7688	0.0169962	0.457621	0.00725061	0.729857
13.8693	0.0165796	0.537216	0.0074177	0.808186
13.9698	0.0161223	0.622257	0.00754044	0.877214
14.0704	0.0156231	0.707634	0.0076207	0.935183
14.1709	0.0150879	0.790024	0.00765713	0.977343
14.2714	0.0145127	0.864442	0.00764883	1
14.3719	0.0139433	0.924733	0.00759944	0.998895
14.4724	0.0133627	0.969859	0.00750289	0.980756
14.5729	0.0127753	0.996332	0.00737759	0.944019
14.6734	0.0121847	1	0.00721898	0.889692
14.7739	0.0115826	0.981458	0.00703326	0.822489
14.8744	0.0110172	0.944126	0.00681864	0.745763
14.9749	0.0104631	0.888965	0.00659178	0.666543
15.0754	0.00992365	0.821748	0.00634769	0.587397
15.1759	0.00940367	0.746939	0.00610065	0.510605
15.2764	0.0089086	0.668352	0.00584956	0.438756
15.3769	0.00841973	0.588836	0.00560205	0.373298
15.4774	0.00798604	0.512674	0.00536132	0.314746
15.5779	0.00757244	0.441214	0.00511886	0.265238
15.6784	0.00719376	0.377592	0.00489885	0.222288
15.7789	0.00684545	0.320892	0.00470046	0.18571
15.8794	0.00652997	0.271359	0.00451148	0.155582
15.9799	0.00623899	0.229237	0.00434061	0.130387
16.0804	0.00599761	0.193692	0.00419046	0.109286
16.1809	0.0057895	0.163225	0.00405059	0.092485
16.2814	0.00561531	0.138563	0.00394323	0.0788222
16.3819	0.0054712	0.118216	0.00385545	0.0675516
16.4824	0.00536018	0.101403	0.00378991	0.0583969
16.5829	0.00526501	0.0874449	0.00374475	0.050943
16.6834	0.00522427	0.0760506	0.00371913	0.044604
16.7839	0.0052124	0.0664091	0.00371786	0.0397416
16.8844	0.005231	0.0588878	0.00373814	0.0357804
16.9849	0.00528218	0.0526494	0.00377369	0.0324957
17.0854	0.00536266	0.0475758	0.0038445	0.0298533
17.1859	0.00547447	0.0433457	0.0039404	0.0276865
17.2864	0.00560602	0.0399699	0.00406106	0.0259438
17.3869	0.0057924	0.0371401	0.00421041	0.0245592
17.4874	0.00601669	0.0349028	0.0043903	0.0233541
17.5879	0.00627808	0.0329547	0.00460148	0.0225555
17.6884	0.00658131	0.0316453	0.00484954	0.0219947
17.7889	0.00692577	0.0306582	0.00511919	0.0216081
17.8894	0.00732343	0.0300277	0.00545046	0.0214199
17.99	0.00772433	0.0296683	0.00582368	0.0213938
18.0905	0.00824693	0.0295971	0.00625109	0.0215529
18.191	0.00882759	0.0298361	0.00672656	0.0218872
18.2915	0.0094835	0.0303632	0.00726643	0.0222598
18.392	0.0102232	0.0309792	0.00786916	0.0229922
18.4925	0.0110592	0.0322214	0.00854164	0.0239189
18.593	0.0120007	0.0338187	0.00927323	0.025096
18.6935	0.0130784	0.0358224	0.0101246	0.0264866
18.794	0.0142958	0.0383171	0.0110784	0.028188
18.8945	0.0155991	0.0413699	0.0121443	0.0302242
18.995	0.0172079	0.0450849	0.0133336	0.0326522
19.0955	0.0190332	0.0496017	0.014661	0.0355751
19.196	0.0211439	0.0550815	0.0161427	0.0387655
19.2965	0.023542	0.0617493	0.0178063	0.0429559
19.397	0.026323	0.069458	0.0196555	0.0479031
19.4975	0.0295157	0.0793808	0.0217317	0.0537874
19.598	0.0331937	0.0914307	0.023948	0.060803
19.6985	0.0374518	0.106205	0.026581	0.0691522
19.799	0.0423473	0.124285	0.0295105	0.0791258
19.8995	0.0477026	0.146674	0.0327918	0.0910184
20	0.108582	0.348205	0.0728979	0.210306

## Sheet: 1E-F
Replicate 1
[ISRIB]	WT + ISRIB				WT + alpha dimer				H160D + ISRIB				H160D + alpha dimer
-5.30103	0.13144494*	0.12709694*	0.13093743*	0.13546382*					0.115652	0.118457	0.116556	0.117255
-5.77815	0.14862809*	0.1428887*	0.14554833*	0.14183397*					0.113267	0.111649	0.116582	0.115758
-6.25527	0.149997	0.149516	0.147106	0.150786					0.116755	0.114499	0.118794	0.114507
-6.73239	0.142968	0.139802	0.140049	0.141784					0.117399	0.118709	0.117253	0.115212
-7.20952	0.135144	0.133183	0.129897	0.132578					0.11462	0.116205	0.115828	0.116353
-7.68664	0.130034	0.126249	0.124772	0.127291					0.116753	0.115973	0.117628	0.115185
-8.16376	0.12326	0.117831	0.126408	0.122017					0.113847	0.113639	0.11612	0.113189
-8.64088	0.118274	0.119793	0.12259	0.117152					0.114888	0.114097	0.116214	0.114494
-9.118	0.121893	0.120919	0.118462	0.121688					0.11873	0.114006	0.117494	0.116905
-9.59512	0.118424	0.115789	0.120466	0.117591					0.117687	0.114804	0.114828	0.115258
-10.0722	0.120566	0.118369	0.119928	0.117828					0.114434	0.116969	0.11862	0.111185
-100	0.121835	0.119529	0.115285	0.117851					0.116842	0.112652	0.117402	0.113907
[eIF2Bα2]
-6.39794					0.142501	0.1406	0.139176	0.136806					0.141497	0.138864	0.128962	0.130626
-6.69897					0.140522	0.138131	0.140241	0.134886					0.139513	0.134443	0.137658	0.133047
-7					0.137147	0.138975	0.139305	0.135256					0.132367	0.131802	0.131503	0.136766
-7.30103					0.137886	0.130382	0.13211	0.136204					0.130309	0.128313	0.129011	0.127421
-7.60206					0.127566	0.127564	0.128859	0.129374					0.127506	0.125478	0.125623	0.124699
-7.90309					0.116851	0.121131	0.126689	0.12103					0.123417	0.11835	0.1237	0.1283
-8.20412					0.120158	0.116986	0.119325	0.120248					0.120203	0.116937	0.121052	0.121756
-8.50515					0.116109	0.122104	0.117675	0.114999					0.115855	0.119184	0.119605	0.122994
-8.80618					0.118633	0.117823	0.119471	0.117122					0.116767	0.118119	0.112669	0.118855
-9.10721					0.11788	0.117422	0.11723	0.116495					0.112742	0.114664	0.12023	0.115131
-9.40824					0.119246	0.120475	0.118551	0.115716					0.117738	0.111622	0.118131	0.116417
-100					0.120353	0.122101	0.118707	0.117106					0.113133	0.118137	0.114289	0.114779
Replicate 2
[ISRIB]	WT + ISRIB				WT + alpha dimer				H160D + ISRIB				H160D + alpha dimer
-5.30103	0.11987258*	0.12407496*	0.12054321*	0.12286557*					0.113194	0.110526	0.116259	0.11299					0.119873	0.124075	0.120543	0.122866
-5.77815	0.12971396*	0.13213801*	0.12889575*	0.13161212*					0.109548	0.11856	0.114003	0.113261					0.129714	0.132138	0.128896	0.131612
-6.25527	0.139674	0.142314	0.136999	0.14014					0.115174	0.110309	0.111391	0.113189
-6.73239	0.128036	0.127993	0.127256	0.130047					0.111486	0.116707	0.112249	0.114513
-7.20952	0.121604	0.115913	0.121757	0.119192					0.11054	0.111299	0.113755	0.112373
-7.68664	0.11492	0.112339	0.113908	0.114637					0.112102	0.112822	0.111606	0.112666
-8.16376	0.110809	0.112467	0.11051	0.110601					0.109899	0.111787	0.114539	0.113385
-8.64088	0.114982	0.11351	0.112402	0.112511					0.111282	0.113907	0.110345	0.11287
-9.118	0.108981	0.111855	0.11454	0.113612					0.114341	0.113951	0.112894	0.114407
-9.59512	0.112605	0.113477	0.111617	0.11133					0.1131	0.11412	0.113119	0.113469
-10.0722	0.110499	0.109441	0.111243	0.114793					0.113402	0.11608	0.110682	0.114141
-100	0.116098	0.109879	0.113783	0.112144					0.11313	0.114332	0.114146	0.115758
[eIF2Bα2]
-6.39794					0.135532	0.132024	0.136793	0.13743					0.133677	0.129237	0.127964	0.133022
-6.69897					0.135359	0.134751	0.138901	0.133602					0.131432	0.134582	0.130825	0.131391
-7					0.135859	0.128592	0.131211	0.130368					0.130207	0.126208	0.1275	0.127367
-7.30103					0.128972	0.128464	0.128866	0.126305					0.128591	0.123412	0.126723	0.127628
-7.60206					0.121249	0.121737	0.124801	0.118712					0.119731	0.120368	0.119155	0.11887
-7.90309					0.11877	0.117209	0.117499	0.112836					0.118528	0.11619	0.119165	0.119975
-8.20412					0.113116	0.112543	0.113328	0.117634					0.116709	0.115505	0.117079	0.118665
-8.50515					0.113784	0.115982	0.112557	0.111077					0.116813	0.115207	0.11165	0.11543
-8.80618					0.11306	0.116493	0.11285	0.111909					0.112586	0.114635	0.112845	0.114099
-9.10721					0.113757	0.11435	0.11333	0.111072					0.115671	0.113739	0.110513	0.114787
-9.40824					0.115133	0.110395	0.112897	0.111797					0.11226	0.110181	0.114583	0.113504
-100					0.112421	0.115176	0.113443	0.111782					0.113859	0.111134	0.113068	0.11579
Replicate 3
[ISRIB]	WT + ISRIB				WT + alpha dimer				H160D + ISRIB				H160D + alpha dimer
-5.30103	0.11788993*	0.11762194*	0.11847122*	0.11979967*					0.113674	0.11519	0.114175	0.113102					0.11789	0.117622	0.118471	0.1198
-5.77815	0.138075	0.133629	0.137062	0.131762					0.113565	0.115178	0.111648	0.111013					0.138075	0.133629	0.137062	0.131762
-6.25527	0.137394	0.138246	0.138595	0.13332					0.11185	0.111751	0.112334	0.111239
-6.73239	0.128593	0.124278	0.124387	0.12573					0.110106	0.112799	0.110724	0.11453
-7.20952	0.115331	0.121467	0.119951	0.119981					0.10818	0.109436	0.110089	0.113174
-7.68664	0.114413	0.115244	0.113065	0.115053					0.110728	0.112553	0.116124	0.111817
-8.16376	0.11018	0.113592	0.116729	0.113996					0.109503	0.113192	0.112606	0.111853
-8.64088	0.113165	0.113911	0.112975	0.112073					0.110945	0.112776	0.113541	0.109345
-9.118	0.109616	0.109127	0.113484	0.111152					0.111634	0.112826	0.110561	0.112414
-9.59512	0.111235	0.110582	0.107777	0.112655					0.113266	0.105467	0.112488	0.112039
-10.0722	0.112659	0.108791	0.111759	0.106258					0.114547	0.113862	0.111634	0.112666
-100	0.110135	0.11543	0.112972	0.111494					0.114602	0.112123	0.113606	0.111397
[eIF2Bα2]
-6.39794					0.135725	0.130922	0.134571	0.131342					0.131827	0.129232	0.12892	0.130394
-6.69897					0.133236	0.132232	0.132032	0.131433					0.131181	0.126816	0.125105	0.126966
-7					0.131567	0.129155	0.131381	0.134007					0.129254	0.126575	0.122633	0.126835
-7.30103					0.128565	0.128928	0.124809	0.127352					0.121825	0.125287	0.125819	0.124156
-7.60206					0.125728	0.121598	0.120191	0.120693					0.120645	0.11681	0.116194	0.119897
-7.90309					0.118237	0.118492	0.118015	0.114396					0.117883	0.117635	0.117495	0.119031
-8.20412					0.116629	0.111066	0.114941	0.114752					0.117555	0.11544	0.110477	0.118385
-8.50515					0.112153	0.110425	0.111878	0.112536					0.11531	0.112369	0.114307	0.111962
-8.80618					0.113999	0.111443	0.110947	0.111435					0.115147	0.114936	0.112928	0.110715
-9.10721					0.110776	0.112484	0.108282	0.11198					0.10902	0.11207	0.111903	0.11372
-9.40824					0.11058	0.110842	0.114922	0.110528					0.1111	0.116278	0.114192	0.109978
-100					0.113999	0.113515	0.113021	0.111643					0.115399	0.111755	0.113399	0.111537
*excluded data
