# Supplementary material for: A point mutation in the nucleotide exchange factor eIF2B constitutively activates the integrated stress response by allosteric modulation
Source: eLife. 2022 Apr 13;11:e76171. doi: 10.7554/eLife.76171 (PMC9132573; doi:10.7554/eLife.76171)
Supplement: Figure 2—figure supplement 1—source data 1. — Rep: replicate. [file elife-76171-fig2-figsupp1-data1.xlsx]

## Sheet: 2-S1A
WT rep 1											WT rep 2											WT rep 3
Time (s)	4000	2000	1000	500	250	125	62.5	31.25	0		Time (s)	4000	2000	1000	500	250	125	62.5	31.25	0		Time (s)	4000	2000	1000	500	250	125	62.5	31.25
50	15617.2	14001.2	14300.5	12687.2	10472	4701.5	4675.5		643		50	12366	12580.5	12134.8	8021.5	6819	6678.5	3689.5		-1047.5		50	17164.2	18062.2	14199.2	5811	6796.75	2842.75	4160	290
55	17652.2	15632.2	14615.5	13033.2	11503	4849.5	5057.5		980		55	12218	13187.5	12025.8	8670.5	7184	7005.5	4541.5		-503.5		55	16292.2	19192.2	14345.2	9621	7737.75	3380.75	4529	629
60	18398.2	16872.2	15328.5	13411.2	12371	5472.5	5254.5		841		60	12808	13940.5	11890.8	9321.5	8238	7211.5	4989.5		124.5		60	15798.2	20057.2	14789.2	10568	8647.75	3424.75	4716	1195
65	18754.2	17627.2	16192.5	13648.2	12660	5777.5	5666.5		880		65	13210	14401.5	12115.8	10275.5	8922	7416.5	5126.5		674.5		65	16590.2	20934.2	15906.2	10969	8736.75	4258.75	5092	1480
70	18942.2	18899.2	16157.5	14233.2	12807	5943.5	5905.5		885		70	13765	15092.5	12503.8	11125.5	9776	7722.5	5740.5		927.5		70	17360.2	21897.2	17640.2	11158	8936.75	4346.75	5334	1806
75	18907.2	19840.2	16563.5	14838.2	12817	6132.5	6081.5		859		75	15066	15964.5	12960.8	12130.5	10395	8141.5	6058.5		1161.5		75	18613.2	23109.2	18856.2	11140	9219.75	3922.75	5495	1986
80	19494.2	20086.2	16520.5	15085.2	13036	6348.5	6343.5		869		80	16167	16213.5	13470.8	13230.5	11002	8546.5	6248.5		1574.5		80	20074.2	23836.2	16683.2	11113	9958.75	5667.75	5527	1985
85	20314.2	20222.2	16847.5	15226.2	13207	6489.5	6451.5		924		85	17222	16538.5	14298.8	14269.5	11471	8801.5	6545.5		1634.5		85	21714.2	24723.2	22016.2	11497	10492.8	5628.75	5705	2363
90	21090.2	20577.2	17086.5	15459.2	13507	6865.5	6759.5		779		90	18006	16982.5	15200.8	15463.5	12062	9372.5	6627.5		1586.5		90	23531.2	25510.2	22647.2	11899	11248.8	4554.75	5869	2168
95	22225.2	21058.2	17315.5	15504.2	13808	7067.5	6995.5		964		95	19101	17763.5	15747.8	16211.5	12578	9722.5	6700.5		1609.5		95	24690.2	26372.2	23197.2	12267	11830.8	6224.75	6074	2569
100	23393.2	22010.2	17843.5	15765.2	14492	7275.5	7231.5		731		100	19932	18996.5	16459.8	16964.5	13248	10005.5	6748.5		1485.5		100	26070.2	27072.2	23706.2	12659	11993.8	6548.75	6323	2543
105	24756.2	22820.2	18414.5	15652.2	15012	7572.5	7525.5		748		105	21181	20710.5	16758.8	17872.5	13827	10487.5	7092.5		1434.5		105	27271.2	27980.2	24094.2	13132	12490.8	6409.75	6593	2497
110	25441.2	23982.2	19177.5	15960.2	15678	7985.5	7788.5		876		110	23206	22025.5	16954.8	18484.5	14215	10885.5	7293.5		1199.5		110	28079.2	28685.2	24673.2	13512	12722.8	6063.75	6561	2717
115	26195.2	25527.2	19597.5	16218.2	16063	8261.5	8354.5		927		115	24669	23196.5	17256.8	19205.5	14555	11201.5	7589.5		1394.5		115	28976.2	29496.2	25098.2	14233	14293.8	6650.75	6697	2572
120	27008.2	27074.2	20433.5	16404.2	16853	8595.5	8452.5		859		120	26378	24132.5	17615.8	19645.5	14766	11605.5	7639.5		1163.5		120	29723.2	30239.2	25700.2	14786	14927.8	7391.75	6892	2864
125	27591.2	28573.2	20896.5	16652.2	17611	8852.5	8813.5		726		125	27950	24823.5	17809.8	20582.5	15088	11844.5	8035.5		942.5		125	30363.2	31338.2	25917.2	15892	15610.8	7025.75	7031	3064
130	28753.2	29982.2	21771.5	17036.2	18042	9496.5	9248.5		870		130	29671	25573.5	18484.8	21095.5	15382	12223.5	8139.5		1239.5		130	30862.2	31929.2	26224.2	16673	15848.8	7870.75	7017	2958
135	29451.2	31387.2	22422.5	17364.2	18505	9741.5	9540.5		888		135	31111	26527.5	18832.8	21469.5	15569	12440.5	8411.5		1214.5		135	31171.2	32754.2	26515.2	17547	16331.8	7888.75	7156	3019
140	30303.2	32711.2	23213.5	17527.2	18797	10176.5	9867.5		990		140	32995	27029.5	19513.8	22430.5	15908	12756.5	8558.5		1025.5		140	31596.2	33768.2	25004.2	18315	16398.8	7225.75	7065	3060
145	31012.2	33974.2	23870.5	17820.2	19494	10464.5	9975.5		814		145	34019	27943.5	20290.8	22866.5	16206	13000.5	8765.5		983.5		145	31731.2	34737.2	28157.2	19579	16278.8	8387.75	7165	3271
150	31914.2	35076.2	24754.5	18352.2	19740	10915.5	10245.5		891		150	35411	28815.5	21260.8	23591.5	16808	13340.5	8966.5		1057.5		150	32350.2	35406.2	28628.2	20429	16320.8	8771.75	7293	3216
155	32713.2	35902.2	25568.5	18455.2	20157	11203.5	10519.5		878		155	36408	29780.5	22171.8	24146.5	17069	13340.5	9099.5		1009.5		155	32933.2	36279.2	29563.2	21312	16487.8	8751.75	7301	3290
160	32912.2	36724.2	26589.5	18820.2	20549	11739.5	10479.5		929		160	37385	30941.5	23438.8	24668.5	17328	13553.5	9188.5		1018.5		160	33512.2	36905.2	30555.2	22113	16554.8	9148.75	7607	3366
165	33734.2	37315.2	27406.5	19343.2	21149	11949.5	10477.5		944		165	38653	32029.5	24155.8	25587.5	17741	13846.5	9482.5		1096.5		165	34126.2	37483.2	31223.2	22984	16886.8	9266.75	7498	3425
170	34007.2	37675.2	28352.5	19361.2	21558	12305.5	8995.5		919		170	39876	33059.5	25430.8	26068.5	17935	13989.5	9612.5		1104.5		170	35128.2	38371.2	31918.2	23865	17120.8	9561.75	7618	3323
175	34762.2	38466.2	29563.5	19542.2	22034	12646.5	10908.5		1112		175	40938	34112.5	26411.8	26835.5	18492	14096.5	9658.5		1045.5		175	36003.2	38908.2	32857.2	24650	17251.8	9697.75	7730	3429
180	35258.2	38269.2	30447.5	20029.2	22350	12911.5	10844.5		1035		180	41795	35304.5	27527.8	27451.5	18945	14347.5	9675.5		1034.5		180	36315.2	39810.2	33148.2	25123	17441.8	9570.75	7770	3550
185	35921.2	38554.2	31172.5	20504.2	22870	13138.5	10957.5		1292		185	42664	36335.5	28312.8	28144.5	19575	14368.5	9913.5		1075.5		185	37967.2	40584.2	34104.2	25808	18051.8	10000.8	7904	3372
190	36728.2	38913.2	32355.5	21009.2	23391	13286.5	11108.5		1364		190	43624	37695.5	29049.8	28528.5	20017	14652.5	10196.5		1260.5		190	38914.2	41274.2	35186.2	26700	18571.8	10044.8	8072	3460
195	37563.2	39331.2	33284.5	21454.2	23731	13436.5	11244.5		1122		195	44344	38831.5	29943.8	29074.5	20605	14830.5	10370.5		1196.5		195	40021.2	41843.2	35607.2	27428	18771.8	10264.8	7943	3655
200	38260.2	39789.2	34094.5	22084.2	24313	13852.5	11569.5		1301		200	44644	39959.5	30708.8	29511.5	21106	15170.5	10193.5		1165.5		200	40716.2	42237.2	36348.2	27956	19213.8	10279.8	8008	3462

## Sheet: 2-S1B
bH160D rep 1											bH160D rep 2											bH160D rep 3
Time (s)	4000	2000	1000	500	250	125	62.5	31.25	0		Time (s)	4000	2000	1000	500	250	125	62.5	31.25	0		Time (s)	4000	2000	1000	500	250	125	62.5	31.25
50	4194.75	4935.25	5575.5	4290.25	2072.25	2018.5	6051.25		-960.75		50	5239	5604	3092.25	1856	3157.75	2715.25	2477		-370.75		50	6696.5	5573.25	6251	4423.5	3888.75	1013.75	3368.5	-340.5
55	5030.75	5298.25	5857.5	4881.25	2617.25	1627.5	6597.25		-400.75		55	5335	5442	3783.25	2406	3391.75	2465.25	2869		-262.75		55	6716.5	6038.25	6686	4796.5	4606.75	1379.75	3970.5	174.5
60	5661.75	4937.25	5901.5	5106.25	3161.25	2969.5	6783.25		266.25		60	5788	5261	4734.25	3188	3780.75	2759.25	3251		-1.75		60	6966.5	6876.25	6961	5001.5	5039.75	1635.75	4338.5	699.5
65	5812.75	6128.25	6174.5	5870.25	3694.25	3216.5	6923.25		639.25		65	6426	5496	5362.25	4013	4059.75	2457.25	3214		328.25		65	7071.5	7440.25	7393	5229.5	5457.75	2389.75	4673.5	1127.5
70	5991.75	6390.25	6928.5	6390.25	3857.25	3520.5	6607.25		887.25		70	6831	5945	6079.25	4499	4499.75	2702.25	3472		325.25		70	7661.5	8052.25	7618	5280.5	5934.75	2662.75	4967.5	1344.5
75	6453.75	6869.25	7725.5	6895.25	4229.25	3855.5	6850.25		1079.25		75	7440	6398	6207.25	4414	4638.75	2844.25	3616		467.25		75	8407.5	8242.25	7937	5665.5	6030.75	3003.75	5352.5	1710.5
80	6857.75	7505.25	8495.5	7382.25	4421.25	4016.5	7076.25		1146.25		80	7495	6829	6338.25	4535	4961.75	2961.25	3913		664.25		80	8816.5	8144.25	8091	5853.5	6509.75	3274.75	5503.5	1842.5
85	7527.75	7834.25	9113.5	7859.25	4455.25	3957.5	7107.25		1174.25		85	7700	7209	6233.25	4326	5179.75	2865.25	4030		693.25		85	9315.5	8047.25	8423	6041.5	6441.75	3477.75	5602.5	2074.5
90	8127.75	8650.25	9181.5	8083.25	4694.25	4173.5	7116.25		1128.25		90	8048	7649	5890.25	4444	5367.75	2710.25	4170		771.25		90	10163.5	8197.25	8905	6587.5	6467.75	3736.75	5539.5	2160.5
95	8729.75	9168.25	9202.5	8419.25	4896.25	4393.5	7140.25		1161.25		95	8763	7809	6152.25	4625	5536.75	2727.25	4192		879.25		95	10589.5	8115.25	9176	6984.5	6581.75	3930.75	5793.5	2189.5
100	9047.75	9309.25	9239.5	8396.25	4724.25	4439.5	6958.25		1353.25		100	9545	8250	6582.25	5207	6005.75	2999.25	4151		741.25		100	10728.5	8688.25	9651	7549.5	6689.75	4043.75	5745.5	2342.5
105	9526.75	8839.25	9459.5	8511.25	5153.25	4431.5	7101.25		975.25		105	10191	8533	7145.25	5467	5999.75	3084.25	4266		778.25		105	11135.5	8681.25	9780	7746.5	6926.75	4202.75	5646.5	2167.5
110	9926.75	10433.2	9356.5	8629.25	5260.25	4488.5	7191.25		952.25		110	10793	8774	7814.25	5933	6321.75	3471.25	4345		743.25		110	11042.5	9023.25	9957	8125.5	7250.75	4292.75	5533.5	2244.5
115	9935.75	10531.2	9523.5	9120.25	5276.25	4830.5	7137.25		1096.25		115	11296	9262	8502.25	6517	6528.75	3774.25	4607		784.25		115	11272.5	9114.25	10280	8494.5	7429.75	4441.75	5646.5	2106.5
120	10264.8	10716.2	9881.5	9299.25	5576.25	4839.5	7251.25		1103.25		120	11598	9577	9177.25	6952	6553.75	3873.25	4644		809.25		120	11207.5	9296.25	10475	8948.5	7599.75	4638.75	5430.5	1982.5
125	10506.8	11027.2	10140.5	9514.25	5855.25	4904.5	7102.25		1082.25		125	11551	10152	9638.25	7270	6772.75	4100.25	4633		862.25		125	11326.5	9362.25	10748	9236.5	7617.75	4894.75	5538.5	2110.5
130	10731.8	11424.2	10541.5	9734.25	6071.25	5113.5	7213.25		1163.25		130	11563	10627	10034.2	7814	6688.75	4266.25	4798		924.25		130	11403.5	9497.25	10770	9520.5	7700.75	5229.75	5617.5	2006.5
135	11028.8	11470.2	11072.5	10133.2	6304.25	5149.5	7135.25		1344.25		135	11917	11131	10273.2	8050	6635.75	4410.25	4614		839.25		135	11786.5	9680.25	11178	9652.5	8142.75	5412.75	5696.5	1939.5
140	11200.8	11687.2	11292.5	10204.2	6529.25	5453.5	7174.25		1259.25		140	12184	11778	10781.2	8271	6877.75	4580.25	4883		788.25		140	11649.5	10372.2	11487	10333.5	8176.75	5521.75	5520.5	2007.5
145	11194.8	12001.2	11641.5	10618.2	6555.25	5415.5	7135.25		1238.25		145	12191	12097	11085.2	8382	7108.75	4570.25	5077		939.25		145	12124.5	10656.2	11502	10511.5	8586.75	5820.75	5802.5	1947.5
150	11474.8	12144.2	11833.5	10871.2	6617.25	5590.5	7152.25		1301.25		150	12254	12270	11472.2	8845	7292.75	4852.25	5029		991.25		150	12482.5	11114.2	12108	10870.5	8622.75	5964.75	5837.5	1819.5
155	11705.8	12521.2	12235.5	11288.2	6700.25	5744.5	7286.25		1253.25		155	12607	12631	11752.2	8930	7529.75	4927.25	5145		826.25		155	12836.5	11422.2	12376	11271.5	9024.75	6194.75	5889.5	1835.5
160	12137.8	12839.2	12311.5	11530.2	7032.25	5902.5	7192.25		1164.25		160	12829	13025	11800.2	9075	7759.75	5008.25	5380		709.25		160	13061.5	11834.2	12507	11527.5	9211.75	6457.75	6142.5	2007.5
165	12299.8	13095.2	12584.5	11882.2	7221.25	5867.5	7342.25		1327.25		165	13034	13368	12320.2	9198	8088.75	4824.25	5330		860.25		165	13718.5	12373.2	12762	11653.5	9465.75	6785.75	6148.5	2029.5
170	12606.8	13244.2	12803.5	11977.2	7452.25	6056.5	7336.25		1594.25		170	13652	13224	12713.2	9377	8171.75	5164.25	5451		872.25		170	14375.5	12802.2	13105	11738.5	9786.75	6787.75	6250.5	1986.5
175	12955.8	13373.2	13210.5	12459.2	7741.25	6356.5	7336.25		1578.25		175	13776	13611	12810.2	9447	8237.75	5200.25	5421		1140.25		175	14493.5	13235.2	13389	11968.5	9909.75	7001.75	6240.5	1976.5
180	13202.8	13816.2	13309.5	12505.2	7766.25	6357.5	7265.25		1738.25		180	14341	14039	13130.2	9675	8575.75	5432.25	5780		988.25		180	14920.5	13587.2	13556	12139.5	10200.8	7111.75	6361.5	1939.5
185	13578.8	14062.2	13812.5	12533.2	8016.25	6757.5	7562.25		1797.25		185	14820	14146	13395.2	9814	8701.75	5466.25	5637		839.25		185	15472.5	13826.2	13856	12272.5	10558.8	7490.75	6430.5	2062.5
190	13957.8	14474.2	14229.5	12872.2	8359.25	6922.5	7418.25		1626.25		190	14983	14476	13727.2	10102	8612.75	5445.25	5922		808.25		190	15814.5	14363.2	14196	12347.5	10785.8	7460.75	6584.5	2123.5
195	14196.8	14943.2	14452.5	13051.2	8174.25	6850.5	7519.25		1831.25		195	15488	14833	13658.2	10440	8868.75	5598.25	5605		919.25		195	16246.5	14945.2	14298	12552.5	11101.8	7630.75	6659.5	2152.5
200	14595.8	15264.2	14731.5	13393.2	8503.25	7061.5	7524.25		1902.25		200	15575	14990	14016.2	10464	8998.75	5501.25	5822		614.25		200	16476.5	15228.2	14776	12637.5	11074.8	7738.75	6660.5	2353.5
