# Supplementary material for: A point mutation in the nucleotide exchange factor eIF2B constitutively activates the integrated stress response by allosteric modulation
Source: eLife. 2022 Apr 13;11:e76171. doi: 10.7554/eLife.76171 (PMC9132573; doi:10.7554/eLife.76171)
Supplement: Figure 2—source data 1. [file elife-76171-fig2-data1.xlsx]

## Sheet: 2-A
Time (min)	WT 4mer		WT 4mer + ISRIB		H160D 4mer		H160D 4mer + ISRIB
0.75	0.9722	0.962896	0.979509	0.957391	0.983587	0.939348	0.9717	0.936984
2.417	0.98975	0.981396	0.97934	0.958694	0.986684	0.939888	0.981861	0.971139
4.083	0.983064	0.980187	0.962488	0.957618	0.983429	0.932477	0.98434	0.964238
5.75	0.970939	0.970414	0.938521	0.93981	0.974634	0.9258	0.978023	0.953299
7.417	0.960064	0.961266	0.913103	0.917353	0.960698	0.927263	0.97052	0.948578
9.083	0.948492	0.953129	0.892371	0.898105	0.959446	0.929119	0.968294	0.937091
10.75	0.943575	0.944256	0.868561	0.88001	0.972203	0.928567	0.971631	0.929178
12.417	0.953643	0.942555	0.859464	0.8668	0.982082	0.924266	0.970015	0.926784
14.083	0.958703	0.948023	0.855706	0.860233	0.976841	0.925218	0.96656	0.931497
15.75	0.95468	0.951968	0.84822	0.861194	0.967112	0.923979	0.959612	0.934702
17.417	0.950449	0.953101	0.836473	0.857555	0.956953	0.920903	0.95466	0.933713
19.083	0.944546	0.948495	0.8225	0.851841	0.950786	0.918048	0.950919	0.931498
20.75	0.938054	0.943721	0.808637	0.839927	0.94524	0.91444	0.944637	0.925331
22.417	0.932939	0.939681	0.796495	0.825898	0.941611	0.913823	0.940678	0.920845
24.083	0.92513	0.939074	0.784975	0.81721	0.938557	0.91052	0.938382	0.91812
25.75	0.919343	0.936721	0.772539	0.807717	0.93312	0.908548	0.932126	0.913777
27.417	0.915864	0.933623	0.760913	0.799645	0.930059	0.906694	0.928101	0.911005
29.083	0.9097	0.930905	0.74969	0.792763	0.924289	0.900934	0.925001	0.907435
30.75	0.905453	0.927783	0.741794	0.785504	0.922519	0.898358	0.922276	0.904238
32.417	0.899269	0.925334	0.73025	0.778649	0.917043	0.896477	0.915237	0.901276
34.083	0.895505	0.922644	0.722966	0.77312	0.912659	0.893291	0.913289	0.900757
35.75	0.890951	0.919024	0.713374	0.76564	0.91005	0.890116	0.909936	0.89529
37.417	0.886369	0.918019	0.704774	0.759231	0.905763	0.887608	0.906171	0.891846
39.083	0.880935	0.913502	0.696862	0.751993	0.902102	0.884982	0.902319	0.890756
40.75	0.878266	0.911959	0.689917	0.747576	0.897883	0.881202	0.898899	0.886239
42.417	0.874601	0.90896	0.682204	0.740927	0.896156	0.881285	0.895571	0.883391
44.083	0.868572	0.905206	0.675912	0.735672	0.892443	0.875753	0.891279	0.87971
45.75	0.861609	0.904408	0.668143	0.730775	0.888762	0.874093	0.887302	0.876933
47.417	0.861051	0.90237	0.662016	0.725421	0.88507	0.871985	0.883212	0.872239
49.083	0.857299	0.897153	0.65478	0.718767	0.882058	0.866976	0.881616	0.870515
50.75	0.853476	0.894367	0.650527	0.715146	0.879329	0.864815	0.878734	0.867808
52.417	0.848914	0.890717	0.644852	0.709542	0.875915	0.863038	0.875881	0.865222
54.083	0.84513	0.891464	0.637577	0.705247	0.873132	0.858663	0.873842	0.863069
55.75	0.842407	0.887839	0.633579	0.699836	0.87182	0.856307	0.869079	0.861454
57.417	0.840125	0.884139	0.628014	0.69492	0.869706	0.855366	0.868601	0.859309
59.083	0.836189	0.881883	0.62317	0.690884	0.86824	0.851223	0.864808	0.855539

## Sheet: 2-B
Time (min)	WT 10mer			bH160D 10mer
0.75	1.01438	0.989878	1.01871	1.02736	1.02573	1.0115
2.417	0.946536	0.9059	0.938626	1.00544	0.995818	0.991468
4.083	0.894083	0.837095	0.883041	0.995795	0.976575	0.980393
5.75	0.850567	0.778595	0.8259	0.979814	0.958844	0.962149
7.417	0.809295	0.727871	0.767642	0.962665	0.941905	0.943362
9.083	0.770856	0.686216	0.72206	0.946635	0.925989	0.923154
10.75	0.743075	0.65109	0.688806	0.932027	0.909881	0.907146
12.417	0.717413	0.621909	0.659041	0.920182	0.898602	0.892399
14.083	0.695376	0.597731	0.636207	0.909421	0.884247	0.876996
15.75	0.673895	0.575355	0.616191	0.899914	0.873152	0.866845
17.417	0.6551	0.556425	0.601598	0.890154	0.862181	0.85388
19.083	0.639781	0.542679	0.58541	0.879054	0.851156	0.842863
20.75	0.623343	0.528618	0.569558	0.871897	0.842007	0.83045
22.417	0.609892	0.516244	0.556759	0.862556	0.833731	0.823407
24.083	0.597406	0.505985	0.545634	0.855859	0.822942	0.814387
25.75	0.586179	0.496844	0.535677	0.847932	0.814247	0.806672
27.417	0.573907	0.486315	0.528913	0.841117	0.807447	0.79739
29.083	0.565834	0.480771	0.527226	0.834349	0.797358	0.790445
30.75	0.556916	0.473615	0.524153	0.828529	0.788888	0.782783
32.417	0.550104	0.467759	0.512693	0.8205	0.781637	0.777946
34.083	0.541022	0.463236	0.500878	0.8144	0.773243	0.767664
35.75	0.534179	0.457957	0.491041	0.809311	0.767227	0.760809
37.417	0.526987	0.455126	0.484259	0.802372	0.759638	0.754292
39.083	0.521969	0.450766	0.480313	0.79716	0.752975	0.748713
40.75	0.516708	0.446893	0.475653	0.791612	0.747073	0.744292
42.417	0.511438	0.444742	0.471721	0.786773	0.739828	0.740067
44.083	0.50609	0.440072	0.467137	0.782912	0.734558	0.730898
45.75	0.501359	0.438288	0.463791	0.776857	0.729217	0.726372
47.417	0.497361	0.436135	0.460993	0.770031	0.723733	0.720054
49.083	0.493283	0.432619	0.45867	0.76746	0.716693	0.716066
50.75	0.489431	0.430783	0.454714	0.761692	0.712633	0.709544
52.417	0.485009	0.428961	0.453224	0.757204	0.706997	0.7053
54.083	0.483024	0.427673	0.450397	0.753248	0.702888	0.702029
55.75	0.479825	0.424883	0.449212	0.748912	0.697566	0.698134
57.417	0.478257	0.42392	0.448952	0.745229	0.693754	0.694806
59.083	0.473859	0.423222	0.450932	0.739175	0.688954	0.691306

## Sheet: 2-C
eIF2 [] in uM	WT			H160D
4	1.39935	2.2795	1.52615	0.590282	0.630634	0.575752
2	1.71957	1.71032	1.50023	0.621194	0.655715	0.523647
1	1.2161	1.17908	1.32346	0.537807	0.666914	0.504581
0.5	0.51689	1.33457	1.2522	0.520685	0.514947	0.556502
0.25	0.842573	0.801573	0.738084	0.350671	0.341416	0.394447
0.125	0.586395	0.541323	0.459047	0.273299	0.220361	0.393522
0.0625	0.425266	0.368255	0.219713	0.0519944	0.181768	0.133364
0.03125			0.162332			0.0748357

## Sheet: 2-D
Vmax (pmole/min)			Km (uM)			Kcat (min-1)
WT	H160D		WT	H160D		WT	H160D
1.638	0.6658		0.3325	0.2183		4.095	1.6645
2.294	0.7253		0.4947	0.229		5.735	1.81325
1.707	0.593		0.2903	0.1154		4.2675	1.4825
