# Supplementary material for: A point mutation in the nucleotide exchange factor eIF2B constitutively activates the integrated stress response by allosteric modulation
Source: eLife. 2022 Apr 13;11:e76171. doi: 10.7554/eLife.76171 (PMC9132573; doi:10.7554/eLife.76171)
Supplement: Figure 3—figure supplement 1—source data 1. — Dissoc = dissociation. [file elife-76171-fig3-figsupp1-data1.xlsx]

## Sheet: 3-sup1A
Replicate 1											Replicate 2											Replicate 3
dissoc time (s)	5	10	20	40	60	120	240	480			dissoc time (s)	5	10	20	40	60	120	240	480			dissoc time (s)	5	10	20	40	60	120	240	480
	94.5823	93.6791	94.8348	95.9968	95.5907	95.4342	95.5207	95.4191				97.8682	96.578	95.9357	96.64	96.2436	96.8759	97.1758	96.1748				95.36	88.8978	88.8008	90.6247	90.3761	88.4756	88.1132
	95.7513	94.7909	95.8136	96.5243	96.5518	96.1465	96.1854	95.8802				98.3422	97.2672	96.9531	97.0218	96.834	97.0983	97.7283	96.3546				96.2949	90.0189	90.3481	92.1138	91.1917	89.6827	89.1025
	96.7485	95.7194	96.4608	97.2602	96.9839	96.8205	96.7901	96.488				98.943	97.7856	97.5571	98.0062	97.509	97.8655	98.2101	97.4239				97.0184	91.983	91.3606	92.7605	92.2589	90.9937	90.1712
	97.722	96.2317	97.0314	97.6601	97.7847	97.225	97.1362	97.0502				99.2101	98.1929	97.8744	98.4925	97.8836	98.6341	98.3077	97.935				97.5406	92.9233	92.6768	93.9896	93.5403	92.0813	91.5925
	98.4253	97.0993	97.3662	97.9861	97.769	97.4817	97.4831	97.5955				99.7354	98.7738	98.2405	98.8341	98.3348	98.9625	98.7221	98.5434				98.2579	94.6902	93.5595	94.9762	94.6253	93.0591	92.8784
1.58	98.9752	97.9219	97.9127	98.4858	98.3727	97.964	98.0311	98.0565			1.58	99.9356	99.362	98.5705	99.0468	98.7266	99.2133	99.1488	98.5113			1.58	98.924	95.5256	94.5388	95.8685	95.3577	93.8119	93.6659
1.68	99.534	98.6901	98.4287	98.811	98.8259	98.2515	98.3675	98.3855			1.68	100	99.6896	99.1682	99.2502	99.0508	99.3022	99.5541	98.2238			1.68	99.4618	96.4907	95.333	96.4165	95.9753	94.7267	94.5032
1.78	99.8118	99.1397	98.9645	99.0523	99.202	98.7729	98.5928	98.5215			1.78	99.8977	100	99.4932	99.5873	99.2404	99.5268	99.6743	98.8632			1.78	100	97.1899	95.8502	96.8763	96.6035	95.6477	95.0964
1.88	99.9306	99.3629	99.2247	99.1709	99.4249	99.1505	98.8142	98.9126			1.88	99.722	99.9502	99.5342	99.877	99.3707	99.6408	99.7203	99.2161			1.88	99.7565	97.7451	96.7141	97.6244	97.2078	96.3613	95.769
1.98	100	99.5001	99.5648	99.4115	99.5319	99.3828	99.0249	99.1795			1.98	99.4081	99.9417	99.5943	99.8989	99.6173	99.7059	99.745	99.4935			1.98	99.3884	98.5167	97.3833	98.0528	97.7614	96.9806	96.4448
2.08	99.9799	99.783	99.7676	99.779	99.7622	99.5712	99.4691	99.4118			2.08	99.0609	99.876	99.6519	99.9068	99.8503	99.7401	99.8315	99.584			2.08	99.0679	98.9071	97.9434	98.3539	98.229	97.5149	96.9854	92.5449
2.18	99.8246	99.8899	99.8788	99.8595	99.7954	99.6564	99.6183	99.5888			2.18	98.5402	99.8363	99.8618	99.8081	100	99.8119	99.9954	99.6356			2.18	98.8441	99.237	98.4766	98.6737	98.4938	97.9205	97.5599	93.4252
2.28	99.7314	99.9129	99.9399	99.9924	99.9133	99.7864	99.6596	99.7539			2.28	98.1642	99.7124	99.9987	99.7412	99.9314	99.9488	100	99.5473			2.28	98.3797	99.6469	98.8405	98.9935	98.8881	98.3448	97.956	94.0744
2.38	99.4482	100	100	100	100	99.9131	99.722	99.8488			2.38	97.7435	99.4532	100	99.7931	99.8629	100	99.9158	99.859			2.38	98.1108	99.9927	99.5158	99.3189	99.2781	98.7864	98.2387	94.6851
2.48	99.2364	99.936	99.9696	99.9314	99.9189	99.9399	99.812	99.9367			2.48	97.0715	99.5257	99.8939	99.9034	99.7316	99.9327	99.9023	100			2.48	97.5951	100	99.5729	99.5547	99.5849	98.9295	98.6612	95.1626
2.58	98.8125	99.806	99.8825	99.8731	99.8995	100	99.9579	100			2.58	96.4819	99.0401	99.7953	100	99.7544	99.7618	99.7776	99.9186			2.58	97.2459	99.9466	99.6709	99.7144	99.7203	99.1228	99.0107	95.4439
2.68	98.3615	99.6374	99.7622	99.8078	99.8681	100	100	99.9328			2.68	95.7365	98.5545	99.4126	99.8206	99.7681	99.4607	99.7585	99.8029			2.68	96.7114	99.9378	99.837	99.9015	99.8304	99.321	99.354	95.6694
2.78	97.8263	99.3492	99.7012	99.7172	99.8294	99.879	99.9619	99.826			2.78	95.0956	98.2156	99.1119	99.5539	99.4402	99.1928	99.6237	99.5267			2.78	96.1572	99.8208	100	100	99.8215	99.5049	99.7127	95.9073
2.88	97.207	99.0274	99.5827	99.6105	99.694	99.7783	99.8298	99.738			2.88	94.4257	97.7087	98.9712	99.3481	99.1056	98.9158	99.5485	99.4293			2.88	95.3821	99.5102	99.9714	99.9057	99.948	99.7185	99.8292	96.2561
2.98	96.7176	98.9185	99.4885	99.5037	99.6175	99.7303	99.636	99.8636			2.98	93.7671	97.1704	98.6806	99.2078	99.02	98.7914	99.4384	99.3113			2.98	94.3319	99.3435	99.981	99.9629	99.9762	99.8662	99.8789	96.7145
3.08	96.2554	98.6272	99.2741	99.2624	99.4507	99.5948	99.5031	99.7736			3.08	93.2664	96.5979	98.3479	98.9744	98.7916	98.7538	99.2937	99.1566			3.08	93.3904	99.0737	99.8323	99.9543	99.9539	99.9244	99.8944	97.2855
3.18	95.7422	98.3548	99.0102	99.1125	99.3328	99.5062	99.3994	99.6066			3.18	92.6722	95.8545	98.0089	98.7892	98.5883	98.6056	99.1106	98.9377			3.18	92.7243	98.8573	99.5697	99.9501	99.9272	100	100	97.2681
3.28	95.0772	98.0131	98.776	98.8771	99.1236	99.3284	99.3232	99.487			3.28	92.0712	95.3163	97.6646	98.5534	98.4375	98.4152	98.9904	98.7051			3.28	91.9652	98.4865	99.4905	99.8986	100	99.9622	99.9193	97.3686
3.38	94.3959	97.5698	98.5274	98.6578	98.8748	99.1846	99.2194	99.3209			3.38	91.3257	94.8576	97.3152	98.2039	98.2674	98.1792	98.9197	98.5103			3.38	91.2995	98.1602	99.481	99.8973	99.9047	99.893	99.8883	97.5596
3.48	93.8131	97.089	98.1909	98.429	98.5799	98.9979	99.0702	99.1578			3.48	90.4914	94.2809	96.925	97.9164	98.023	97.9477	98.6738	98.4003			3.48	90.7871	97.8834	99.3893	99.8573	99.8602	99.8632	99.8914	97.7627
3.58	93.2999	96.6581	97.8508	98.2258	98.3017	98.8314	98.9276	98.968			3.58	89.7568	93.761	96.4323	97.6266	97.8219	97.7425	98.493	98.2788			3.58	90.2391	97.6334	99.1726	99.6846	99.7767	99.7972	99.834	97.8773
3.68	92.6716	96.2034	97.5789	98.0158	98.0501	98.6324	98.7542	98.8573			3.68	89.0627	93.2597	96.1803	97.3656	97.6986	97.487	98.4122	98.116			3.68	89.6566	97.2253	99.0918	99.5375	99.7262	99.6904	99.8899	97.964
3.78	92.1584	95.7192	97.2666	97.7015	97.804	98.4448	98.5336	98.6921			3.78	88.4061	92.7144	95.8474	97.0713	97.4451	97.2499	98.2337	97.9796			3.78	89.0033	96.7144	98.8419	99.4076	99.6354	99.5787	99.9147	98.1533
3.88	91.6504	95.167	96.9337	97.4407	97.6106	98.2637	98.4032	98.5199			3.88	87.5983	92.0964	95.4265	96.8022	97.1482	97.032	98.073	97.9029			3.88	88.254	96.4217	98.5477	99.1748	99.4776	99.6085	99.9364	98.2677
3.98	91.0878	94.686	96.494	97.1409	97.3709	98.0907	98.1632	98.289			3.98	86.9551	91.4469	95.09	96.5688	96.8546	96.828	97.7171	97.81			3.98	87.4821	95.9196	98.2393	98.9878	99.3408	99.5566	99.9503	98.4466
4.08	90.4961	94.1422	96.1798	96.9327	97.1314	97.8552	97.9614	98.0697			4.08	86.2587	90.8531	94.7495	96.3445	96.6033	96.7572	97.4812	97.7505			4.08	86.8673	95.5454	98.0651	98.7709	99.1547	99.4246	99.8821	98.5316
4.18	89.9427	93.6088	95.8371	96.7268	96.8698	97.6245	97.7928	97.8619			4.18	85.5845	90.171	94.3387	96.0744	96.3088	96.5293	97.2421	97.6771			4.18	86.1913	95.1355	97.877	98.5425	98.9716	99.4043	99.8014	98.5992
4.28	89.2997	93.1017	95.471	96.499	96.6486	97.3865	97.565	97.6032			4.28	84.89	89.469	93.9127	95.796	96.0323	96.2647	97.0209	97.5511			4.28	85.4007	94.7433	97.6	98.3596	98.7826	99.3616	99.7531	98.6843
4.38	88.7243	92.5976	95.0923	96.3085	96.3896	97.1957	97.4256	97.4765			4.38	84.238	88.8239	93.4378	95.5361	95.7834	95.9386	96.8153	97.3138			4.38	84.5136	94.2272	97.3232	98.1783	98.6039	99.2172	99.7314	98.844
4.48	88.1251	92.0831	94.7539	96.0375	96.1464	96.9472	97.2553	97.4078			4.48	83.5462	88.4508	93.0553	95.2935	95.5446	95.7346	96.5638	97.0995			4.48	83.7385	93.6522	97.051	97.9786	98.5355	99.0663	99.7252	98.9464
4.58	87.5006	91.5256	94.3519	95.7283	95.9252	96.8051	97.0843	97.2619			4.58	82.9363	87.9025	92.6534	95.0888	95.2499	95.4176	96.3416	97.0125			4.58	82.8962	93.1858	96.8123	97.8042	98.3852	98.9154	99.6103	99.0922
4.68	86.9013	90.9974	94.0378	95.4497	95.6976	96.6069	96.9149	97.1383			4.68	82.2778	87.4154	92.258	94.8358	95.1232	95.1041	96.1786	96.8439			4.68	82.1821	92.6181	96.4609	97.7173	98.345	98.7802	99.5606	99.2191
4.78	86.2913	90.4787	93.6807	95.1676	95.4728	96.4372	96.7106	97.0008			4.78	81.6457	86.9097	91.9138	94.5115	94.9051	95.0094	95.9709	96.6607			4.78	81.4808	91.9759	96.1572	97.593	98.2051	98.6231	99.4316	99.2364
4.88	85.6886	90.0502	93.3468	94.8373	95.2415	96.252	96.5218	96.8618			4.88	81.0848	86.3359	91.5504	94.2195	94.6595	94.917	95.7856	96.452			4.88	80.959	91.4223	95.7854	97.4689	98.0964	98.4831	99.3509	99.2468
4.98	85.1205	89.5398	93.0382	94.552	95.0037	96.088	96.3555	96.712			4.98	80.4397	85.7763	91.1972	94.0057	94.4276	94.7083	95.6094	96.2929			4.98	80.5331	90.8582	95.5878	97.3088	97.9491	98.3637	99.2499	99.2746
5.08	84.5488	89.0348	92.7528	94.2505	94.7623	95.9435	96.1546	96.5576			5.08	79.8942	85.1795	90.9131	93.7756	94.2335	94.5282	95.378	96.1827			5.08	79.9916	90.3507	95.4089	97.1148	97.8895	98.1766	99.1986	99.3544
5.18	83.9404	88.5611	92.4109	93.9566	94.5199	95.7721	95.9649	96.3753			5.18	79.249	84.5957	90.6303	93.5342	94.0085	94.3093	95.2781	96.0384			5.18	79.4379	89.9588	95.167	96.9291	97.7868	97.9519	99.1023	99.4099
5.28	83.3396	88.0581	92.0779	93.7661	94.2711	95.617	95.8133	96.2193			5.28	78.648	84.1571	90.2988	93.303	93.8029	94.169	95.1152	95.7828			5.28	78.98	89.6429	94.898	96.6764	97.6246	97.7916	99.0137	99.389
5.38	82.8755	87.5646	91.7396	93.5865	94.0482	95.4545	95.6341	96.0672			5.38	78.1319	83.831	90.0225	93.0604	93.5974	94.0015	94.9468	95.5033			5.38	78.5029	89.3111	94.6305	96.4595	97.501	97.7696	98.9081	99.4239
5.48	82.3676	87.0752	91.3663	93.3832	93.9054	95.314	95.4696	95.9127			5.48	77.6024	83.4238	89.691	92.8557	93.3746	93.8612	94.8143	95.2511			5.48	78.1184	88.889	94.3695	96.3497	97.4177	97.6972	98.8306	99.4448
5.58	81.8984	86.5806	91.0226	93.197	93.7091	95.1541	95.3099	95.7212			5.58	77.068	83.0149	89.4032	92.62	93.2593	93.6708	94.6695	95.0895			5.58	77.6347	88.4898	94.072	96.2654	97.2836	97.6107	98.717	99.4637
5.68	81.3667	86.1928	90.7345	92.9785	93.5506	94.9592	95.1096	95.5667			5.68	76.5006	82.6133	89.1177	92.3946	93.0754	93.5054	94.5257	94.9875			5.68	77.1576	88.1669	93.7922	96.0355	97.1274	97.5463	98.6566	99.481
5.78	80.9283	85.802	90.3944	92.7583	93.3911	94.7983	94.9597	95.3937			5.78	76.0446	82.2316	88.8733	92.1613	92.8858	93.3708	94.3763	94.8992			5.78	76.7797	87.8512	93.5832	95.9412	96.9876	97.4379	98.5431	99.5923
5.88	80.4699	85.3755	90.0813	92.5745	93.228	94.6156	94.8179	95.2439			5.88	75.5794	81.7975	88.6251	92.0301	92.6951	93.209	94.2169	94.8385			5.88	76.2546	87.5851	93.3649	95.7728	96.8639	97.3121	98.5276	99.6545
5.98	80.0572	84.9951	89.8229	92.3754	93.0714	94.4313	94.6354	95.0446			5.98	75.1545	81.3445	88.3731	91.9013	92.5181	93.0185	94.026	94.7389			5.98	75.816	87.239	93.0739	95.6713	96.721	97.2478	98.4437	99.7363
6.08	79.5821	84.5917	89.5339	92.1528	92.8871	94.259	94.402	94.8291			6.08	74.7537	80.9074	88.1067	91.7116	92.3513	92.8578	93.8856	94.5692			6.08	75.3323	86.8416	92.8396	95.5158	96.6214	97.1629	98.3801	99.7312
6.18	79.1164	84.1506	89.2916	91.9283	92.7065	94.0999	94.2464	94.7866			6.18	74.3042	80.4588	87.8381	91.5356	92.1789	92.6879	93.6891	94.5096			6.18	74.8679	86.494	92.6213	95.3645	96.4368	97.1158	98.3009	99.7725
6.28	78.7474	83.7428	89.0313	91.7192	92.5231	93.9521	94.0988	94.7126			6.28	73.8861	80.0158	87.5962	91.3413	92.0361	92.567	93.5151	94.3756			6.28	74.3941	86.1711	92.4047	95.256	96.331	97.0057	98.2806	99.8318
6.38	78.3528	83.3164	88.7263	91.4888	92.3849	93.7912	93.9886	94.6284			6.38	73.5032	79.5787	87.4004	91.1711	91.8442	92.4108	93.3825	94.2793			6.38	73.9715	85.8109	92.1499	95.1103	96.1822	96.9144	98.2822	99.8751
6.48	77.9639	82.9602	88.4544	91.2914	92.2302	93.6297	93.8573	94.5172			6.48	73.1181	79.1771	87.142	90.9836	91.6866	92.2797	93.2568	94.1453			6.48	73.5616	85.4721	91.8715	94.9819	96.023	96.7716	98.1719	99.9671
6.58	77.5473	82.4572	88.1743	91.1492	92.0808	93.4729	93.7163	94.4276			6.58	72.7954	78.7455	86.9269	90.7779	91.5359	92.1315	93.0885	93.955			6.58	73.2095	85.1812	91.7324	94.8635	95.9039	96.7337	98.0276	100
6.68	77.1365	82.1552	87.8737	90.9553	91.9112	93.3268	93.5979	94.3024			6.68	72.3639	78.3098	86.703	90.5444	91.4182	91.9787	92.9649	93.8186			6.68	72.7897	84.8495	91.5266	94.7392	95.7597	96.6521	97.9079	99.908
6.78	76.7563	81.7508	87.6377	90.7774	91.7371	93.2374	93.4941	94.2005			6.78	72.0278	78.069	86.5046	90.3547	91.2401	91.8145	92.8335	93.8426			6.78	72.4471	84.5922	91.3162	94.6464	95.6837	96.5215	97.8085	99.8802
6.88	76.3729	81.4846	87.4295	90.6072	91.574	93.1181	93.3572	94.094			6.88	71.6939	77.8029	86.236	90.1236	91.0825	91.6879	92.6762	93.7636			6.88	72.0437	84.2373	91.1233	94.5179	95.5914	96.4163	97.6516	99.79
6.98	75.9565	80.9744	87.2133	90.4302	91.4293	92.9735	93.2413	93.9974			6.98	71.378	77.5052	86.0095	89.9602	90.9592	91.6036	92.5213	93.6169			6.98	71.7584	83.9357	90.954	94.3779	95.4619	96.3267	97.5148	99.7536
7.08	75.5873	80.6421	86.9826	90.2659	91.2856	92.8866	93.1586	93.8793			7.08	70.9217	77.2431	85.8098	89.7762	90.8472	91.4702	92.4349	93.57			7.08	71.4576	83.6396	90.7942	94.2467	95.3459	96.2465	97.4403	99.6945
7.18	75.2165	80.3079	86.7413	90.1211	91.1529	92.7883	93.0483	93.7719			7.18	70.5813	76.9854	85.6024	89.651	90.7193	91.3482	92.3248	93.5241			7.18	71.1694	83.3628	90.6138	94.1367	95.1805	96.1443	97.3331	99.7189
7.28	74.8623	80.0165	86.4963	89.9619	90.9963	92.6957	92.9421	93.687			7.28	70.2942	76.7305	85.408	89.4692	90.6027	91.2273	92.2821	93.4576			7.28	70.9677	83.1393	90.4414	94.0225	95.1003	96.0626	97.2663	99.6374
7.38	74.5078	79.7012	86.2835	89.751	90.869	92.6015	92.8295	93.5742			7.38	69.9806	76.4784	85.2352	89.3462	90.4715	91.0745	92.1429	93.3649			7.38	70.6956	82.8748	90.2057	93.9326	94.9528	95.9574	97.1732	99.6112
7.48	74.1207	79.3972	86.0762	89.6104	90.7419	92.4684	92.7427	93.4723			7.48	69.6755	76.2335	85.0241	89.1726	90.3481	90.94	92.0553	93.4038			7.48	70.4808	82.6495	90.0887	93.8612	94.8545	95.8771	97.0645	99.5592
7.58	73.8155	79.0944	85.8707	89.4834	90.5816	92.349	92.6641	93.3688			7.58	69.3084	75.9701	84.8116	89.0633	90.2339	90.8236	91.9734	93.3659			7.58	70.2344	82.4102	90.0079	93.7214	94.7802	95.8002	97.01	99.5419
7.68	73.5051	78.7915	85.6706	89.3479	90.425	92.2345	92.5887	93.256			7.68	68.9079	75.6881	84.6595	88.9898	90.0946	90.7324	91.9216	93.1666			7.68	69.9909	82.1493	89.834	93.6327	94.6865	95.6823	96.9667	99.5245
7.78	73.1726	78.5485	85.4526	89.2081	90.2959	92.1508	92.4931	93.1656			7.78	68.5675	75.419	84.4867	88.9323	89.9312	90.6322	91.8341	93.0599			7.78	69.8565	81.9665	89.7469	93.5043	94.621	95.5675	96.8641	99.547
7.88	72.8511	78.2707	85.2292	89.0556	90.1586	92.0257	92.4072	93.0575			7.88	68.2513	75.174	84.2742	88.7942	89.8284	90.5443	91.7072	92.9397			7.88	69.7413	81.7271	89.6867	93.3945	94.5152	95.5439	96.7663	99.5157
7.98	72.568	77.97	85.0228	88.9227	90.038	91.9405	92.3277	92.9587			7.98	67.9776	74.9803	84.1284	88.6953	89.728	90.4554	91.6118	92.8308			7.98	69.5585	81.5407	89.5792	93.2587	94.42	95.4544	96.6869	99.5297
8.08	72.254	77.6923	84.8047	88.7914	89.9162	91.8284	92.2499	92.8637			8.08	67.7019	74.7098	83.9722	88.6276	89.5898	90.3356	91.5725	92.7563			8.08	69.3121	81.3865	89.4178	93.1688	94.3009	95.3633	96.6327	99.4861
8.18	71.9287	77.4031	84.6252	88.6848	89.7633	91.7431	92.1574	92.7625			8.18	67.4236	74.4677	83.8493	88.501	89.4802	90.2398	91.5331	92.7277			8.18	69.0301	81.1771	89.3386	93.1002	94.2563	95.283	96.5488	99.5019
8.28	71.5909	77.1066	84.4619	88.5458	89.6648	91.6295	92.0464	92.6667			8.28	67.1655	74.244	83.7432	88.3884	89.3979	90.184	91.4725	92.6372			8.28	68.9277	80.9927	89.1949	92.9946	94.167	95.2421	96.4277	99.507
8.38	71.3188	76.8404	84.2887	88.4273	89.5836	91.5385	91.9394	92.5733			8.38	66.9052	74.0076	83.6166	88.2848	89.2974	90.1065	91.4209	92.5832			8.38	68.7358	80.7868	89.0934	92.8905	94.1357	95.1242	96.3189	99.5383
8.48	71.0648	76.57	84.1093	88.296	89.4804	91.4402	91.8535	92.4814			8.48	66.5936	73.7726	83.4323	88.1849	89.1774	90.0335	91.3288	92.5592			8.48	68.521	80.6183	89.0082	92.7848	94.0525	95.0723	96.2645	99.5541
8.58	70.8437	76.3647	83.9441	88.2021	89.3671	91.3663	91.7846	92.4011			8.58	66.3378	73.5947	83.2927	88.0756	89.1238	89.9366	91.2412	92.5042			8.58	68.3993	80.4285	88.8895	92.6805	93.969	94.975	96.1992	99.599
8.68	70.5278	76.086	83.7772	88.0928	89.2685	91.2802	91.6849	92.3355			8.68	66.1862	73.3811	83.1609	87.9744	89.013	89.8989	91.1469	92.3782			8.68	68.1591	80.2404	88.7581	92.6191	93.8633	94.912	96.1092	99.6512
8.78	70.2629	75.8732	83.6112	87.981	89.1708	91.2054	91.5778	92.2636			8.78	65.9749	73.2544	83.047	87.8778	88.9147	89.8089	91.0447	92.2762			8.78	67.9992	80.0878	88.6285	92.5336	93.777	94.8555	95.9897	99.6547
8.88	69.9524	75.6207	83.4658	87.8844	89.0916	91.0991	91.4928	92.1617			8.88	65.808	73.0621	82.9344	87.8054	88.8371	89.6982	90.9493	92.2177			8.88	67.7812	79.9529	88.5177	92.4292	93.704	94.7784	95.9229	99.6736
8.98	69.7186	75.4047	83.3294	87.798	88.9911	91.0162	91.4255	92.0837			8.98	65.61	72.9041	82.8526	87.6903	88.764	89.6288	90.8583	92.1432			8.98	67.557	79.7402	88.4418	92.3523	93.5939	94.7078	95.8141	99.6772
9.08	69.4556	75.1858	83.2316	87.6939	88.8953	90.9359	91.3266	92.025			9.08	65.4588	72.6875	82.786	87.6145	88.6897	89.5352	90.7909	92.0802			9.08	67.3651	79.6266	88.41	92.2666	93.4927	94.648	95.7939	99.7154
9.18	69.2381	74.9751	83.1311	87.6058	88.8003	90.8676	91.2439	91.9524			9.18	65.2628	72.5366	82.667	87.5271	88.6201	89.4999	90.6999	91.9805			9.18	67.2307	79.4829	88.3041	92.1908	93.3632	94.5899	95.696	99.7154
9.28	69.0025	74.7939	82.9901	87.4771	88.7156	90.7848	91.1296	91.8937			9.28	65.0759	72.3742	82.544	87.4822	88.507	89.4326	90.6157	91.8888			9.28	67.1823	79.2753	88.1775	92.1023	93.3112	94.5018	95.6076	99.7032
9.38	68.8839	74.601	82.8456	87.3576	88.6161	90.7344	91.0794	91.8311			9.38	64.909	72.2105	82.4046	87.4167	88.4156	89.3186	90.5282	91.7971			9.38	67.0704	79.1511	88.1301	92.0596	93.2041	94.3903	95.5702	99.6945
9.48	68.6555	74.3652	82.7057	87.2798	88.5064	90.6995	91.008	91.7679			9.48	64.7731	72.0253	82.3227	87.3178	88.3608	89.2525	90.4395	91.6962			9.48	66.9487	78.9897	88.0572	92.0195	93.1086	94.2819	95.5221	99.7016
9.58	68.4911	74.1452	82.5702	87.195	88.4438	90.6354	90.9351	91.6883			9.58	64.6062	71.9072	82.2472	87.2212	88.3107	89.2047	90.3788	91.6023			9.58	66.8241	78.823	87.9718	91.9697	93.0105	94.2048	95.4227	99.6181
9.68	68.2938	73.9848	82.4518	87.0934	88.3626	90.5696	90.8727	91.5941			9.68	64.4863	71.8045	82.1424	87.1384	88.2501	89.1339	90.3406	91.5531			9.68	66.6958	78.6933	87.8928	91.9154	92.997	94.098	95.3527	99.5245
9.78	68.0619	73.769	82.3324	86.9977	88.2917	90.4908	90.8183	91.5192			9.78	64.4282	71.6509	82.0962	87.0982	88.2124	89.0723	90.2845	91.4568			9.78	66.5708	78.5603	87.7535	91.8525	92.9196	94.035	95.2704	99.4723
9.88	67.9066	73.6065	82.2122	86.924	88.2245	90.3974	90.7494	91.4335			9.88	64.2949	71.4728	81.9786	87.0143	88.1211	89.0142	90.2092	91.3983			9.88	66.4941	78.4858	87.6713	91.7882	92.8274	93.9769	95.272	99.3786
9.98	67.7605	73.42	82.1009	86.8436	88.1581	90.3324	90.6871	91.364			9.98	64.1858	71.3488	81.8978	86.9832	88.0525	88.956	90.1632	91.3238			9.98	66.4076	78.3707	87.5716	91.684	92.7529	93.9439	95.2036	99.2953
10.08	67.5503	73.288	81.9851	86.7707	88.0955	90.2748	90.623	91.2967			10.08	64.0721	71.2251	81.7763	86.9533	87.9953	88.8853	90.1126	91.2906			10.08	66.3883	78.2996	87.472	91.6669	92.744	93.8638	95.1199	99.2068
10.18	67.3714	73.1183	81.8702	86.7098	88.0374	90.2163	90.563	91.2157			10.18	63.8964	71.121	81.6394	86.8912	87.9315	88.8135	90.0431	91.1944			10.18	66.3277	78.2464	87.3754	91.5927	92.6562	93.8544	95.0374	99.1357
10.28	67.2307	72.9904	81.7428	86.6302	87.9858	90.1481	90.4973	91.1539			10.28	63.783	71.01	81.5626	86.8129	87.8755	88.7656	89.9623	91.1668			10.28	66.2121	78.1381	87.3264	91.5227	92.6042	93.7914	94.9769	99.0922
10.38	67.0883	72.7924	81.6414	86.5752	87.9739	90.0928	90.4511	91.099			10.38	63.705	70.886	81.4705	86.7417	87.8047	88.6995	89.9105	91.1176			10.38	66.1096	78.0957	87.2725	91.4286	92.5744	93.7019	94.9396	98.962
10.48	66.88	72.6163	81.5364	86.4981	87.9157	90.0255	90.4016	91.048			10.48	63.5851	70.775	81.3963	86.6808	87.7442	88.6379	89.8735	91.0832			10.48	66.0842	78.0032	87.195	91.3728	92.4881	93.6467	94.8821	98.8962
10.58	66.7411	72.4675	81.4538	86.4066	87.854	89.9588	90.358	91.0033			10.58	63.4671	70.6795	81.3567	86.6475	87.6961	88.5797	89.7938	91.0294			10.58	66.0297	77.9394	87.1128	91.2287	92.4211	93.5761	94.7672	98.8303
10.68	66.5732	72.3114	81.3883	86.3464	87.7987	89.8898	90.3157	90.9445			10.68	63.407	70.5699	81.2682	86.5749	87.6493	88.5534	89.7365	91.0064			10.68	65.9912	77.8952	87.0273	91.1801	92.366	93.5526	94.7036	98.7538
10.78	66.4051	72.1751	81.2869	86.2736	87.7407	89.8484	90.246	90.9029			10.78	63.3267	70.4589	81.1621	86.4887	87.6196	88.484	89.6972	90.9549			10.78	65.9207	77.8118	86.9309	91.1059	92.2767	93.4661	94.6103	98.7103
10.88	66.2936	72.0567	81.2224	86.1805	87.6605	89.8005	90.2015	90.8619			10.88	63.2156	70.3933	81.061	86.4186	87.542	88.4065	89.6523	90.9365			10.88	65.8473	77.7621	86.9089	91.0388	92.2321	93.3828	94.5451	98.6478
10.98	66.1751	71.8995	81.1497	86.1093	87.6209	89.7543	90.1496	90.814			10.98	63.1176	70.3377	81.0251	86.3715	87.4986	88.3369	89.5917	90.8609			10.98	65.7415	77.7105	86.8439	90.9789	92.1204	93.3057	94.4286	98.6045
11.08	66.0525	71.7801	81.0546	86.0331	87.5712	89.7274	90.1082	90.7778			11.08	63.004	70.1926	80.9637	86.253	87.4449	88.3015	89.5232	90.8287			11.08	65.7317	77.6379	86.8392	90.889	91.9968	93.2963	94.3666	98.5541
11.18	65.9429	71.6533	80.9755	85.9848	87.5011	89.6721	90.0378	90.7268			11.18	62.9818	70.1099	80.8998	86.2012	87.3958	88.2696	89.4536	90.7566			11.18	65.6776	77.6202	86.7663	90.8489	91.9493	93.2019	94.2685	98.4848
11.28	65.8791	71.5097	80.9172	85.9179	87.4485	89.5991	89.9915	90.6534			11.28	62.9507	70.006	80.8102	86.1231	87.3536	88.2127	89.3806	90.7108			11.28	65.6616	77.5545	86.7537	90.8104	91.9179	93.1391	94.2017	98.391
11.38	65.7694	71.3662	80.8427	85.8299	87.3859	89.5406	89.9291	90.5924			11.38	62.904	69.9633	80.7858	86.0748	87.3249	88.1556	89.3356	90.6248			11.38	65.6132	77.5579	86.7126	90.7419	91.8718	93.0418	94.1336	98.2799
11.48	65.5924	71.2813	80.7557	85.7621	87.3288	89.4878	89.874	90.5106			11.48	62.8171	69.8822	80.7244	86	87.2793	88.0952	89.2796	90.5401			11.48	65.5108	77.4923	86.6351	90.6962	91.7632	92.9709	94.0946	98.1844
11.58	65.4935	71.1974	80.7171	85.696	87.2662	89.4464	89.7986	90.4341			11.58	62.7436	69.8423	80.6605	85.9448	87.2257	88.0552	89.2199	90.493			11.58	65.4534	77.4215	86.5687	90.6534	91.6961	92.9615	94.0326	98.0769
11.68	65.3677	71.0874	80.6283	85.6232	87.2072	89.3863	89.7557	90.3692			11.68	62.677	69.7539	80.5952	85.9023	87.1844	88.0267	89.1538	90.4679			11.68	65.4275	77.3592	86.5116	90.6134	91.6024	92.9363	93.9548	97.99
11.78	65.3055	70.9816	80.5439	85.5478	87.1647	89.3457	89.6851	90.2989			11.78	62.5881	69.6656	80.5133	85.8564	87.1469	87.9594	89.102	90.3796			11.78	65.3829	77.3363	86.4579	90.5006	91.5578	92.8798	93.8461	97.898
11.88	65.2562	70.8799	80.4533	85.5055	87.1169	89.2995	89.6324	90.2387			11.88	62.5212	69.5929	80.4954	85.8241	87.0909	87.8843	89.0527	90.3189			11.88	65.3476	77.2707	86.4214	90.4778	91.4774	92.8341	93.829	97.7818
11.98	65.1905	70.793	80.3474	85.442	87.0644	89.2482	89.5798	90.1576			11.98	62.4767	69.4976	80.443	85.7654	87.06	87.8135	89.0257	90.2603			11.98	65.3349	77.1785	86.401	90.4491	91.3986	92.7352	93.753	97.7158
12.08	65.1465	70.7049	80.2953	85.3743	87.033	89.1873	89.5149	90.0935			12.08	62.4323	69.4505	80.3968	85.7516	87.0017	87.768	88.9572	90.2215			12.08	65.2997	77.1233	86.3218	90.4177	91.342	92.6754	93.6178	97.6343
12.18	65.0661	70.5645	80.2145	85.3192	86.951	89.1338	89.4541	90.0301			12.18	62.3876	69.4591	80.3662	85.6953	86.9732	87.7223	88.9033	90.1641			12.18	65.2931	77.0577	86.2475	90.3579	91.2557	92.5732	93.5542	97.5456
12.28	64.9602	70.4482	80.1302	85.2659	86.9279	89.094	89.3949	89.9815			12.28	62.3187	69.3836	80.3341	85.617	86.9046	87.6675	88.8494	90.1103			12.28	65.2677	76.9868	86.1479	90.2936	91.2096	92.5418	93.4733	97.473
12.38	64.8854	70.3926	80.0557	85.2277	86.8607	89.0412	89.3341	89.926			12.38	62.2942	69.2982	80.3149	85.563	86.8453	87.6083	88.8078	90.0713			12.38	65.1746	76.9035	86.1051	90.2307	91.1336	92.5151	93.3445	97.4208
12.48	64.8508	70.2763	80.0109	85.1922	86.822	89.0006	89.2864	89.8719			12.48	62.2432	69.294	80.2958	85.4884	86.7745	87.5718	88.7539	90.0267			12.48	65.1328	76.8342	86.026	90.1608	91.0593	92.4758	93.2745	97.3652
12.58	64.7704	70.1873	79.957	85.1244	86.7833	88.9356	89.2473	89.8332			12.58	62.2141	69.2511	80.2984	85.4619	86.746	87.5398	88.6788	90.0003			12.58	65.0467	76.7863	85.9358	90.0824	91.0413	92.4366	93.1751	97.3166
12.68	64.6862	70.0972	79.878	85.1015	86.7161	88.8803	89.2069	89.7738			12.68	62.1498	69.1744	80.2216	85.4273	86.6991	87.4965	88.6226	89.9269			12.68	64.9951	76.7439	85.9152	90.0109	91.0042	92.3768	93.0928	97.2957
12.78	64.6516	70.0301	79.8341	85.0642	86.6562	88.8138	89.1372	89.7166			12.78	62.1253	69.1159	80.2165	85.3733	86.6592	87.4339	88.5642	89.8203			12.78	64.9631	76.6462	85.8947	89.9681	90.8895	92.3155	93.0182	97.2073
12.88	64.6352	69.9473	79.7506	85.0185	86.6073	88.761	89.0974	89.6633			12.88	62.1364	69.0774	80.1614	85.287	86.594	87.3574	88.4956	89.7883			12.88	64.9664	76.5965	85.8599	89.8753	90.8508	92.193	92.9733	97.1308
12.98	64.5878	69.8489	79.7004	84.9905	86.5501	88.7082	89.061	89.6093			12.98	62.0874	69.0247	80.1333	85.2526	86.5256	87.3574	88.4317	89.7057			12.98	64.8578	76.5645	85.8235	89.8353	90.7735	92.13	92.9126	97.0006
13.08	64.5127	69.81	79.6546	84.9212	86.5243	88.6676	89.0083	89.5498			13.08	62.0495	68.9693	80.1216	85.2261	86.4627	87.2948	88.3868	89.5969			13.08	64.8225	76.5345	85.7412	89.7682	90.7169	92.1018	92.8568	96.926
13.18	64.4762	69.7409	79.5882	84.9025	86.4829	88.6083	88.9596	89.4888			13.18	62.0472	68.9436	80.091	85.1905	86.4055	87.2285	88.3048	89.5476			13.18	64.8193	76.5077	85.6969	89.7025	90.6514	92.0672	92.7977	96.8047
13.28	64.4379	69.7074	79.547	84.8449	86.4285	88.5482	88.9135	89.451			13.28	62.0384	68.8951	80.036	85.1204	86.3428	87.1807	88.2576	89.4995			13.28	64.7746	76.4811	85.6384	89.6582	90.6007	92.0153	92.7184	96.7089
13.38	64.3757	69.6277	79.5173	84.8212	86.3539	88.4946	88.864	89.3853			13.38	62.0051	68.861	80.0104	85.0939	86.2651	87.1214	88.2016	89.4421			13.38	64.7229	76.396	85.5562	89.6069	90.5679	91.9698	92.6657	96.619
13.48	64.3392	69.5617	79.441	84.783	86.3134	88.4483	88.8242	89.3336			13.48	61.976	68.7885	79.9708	85.0457	86.2137	87.069	88.1363	89.3906			13.48	64.7168	76.3749	85.5309	89.5754	90.5353	91.8928	92.6035	96.4417
13.58	64.2773	69.4946	79.3818	84.7374	86.2644	88.4077	88.7708	89.2903			13.58	61.9472	68.75	79.9208	85.0593	86.1715	87.0039	88.0971	89.2818			13.58	64.7008	76.3163	85.5387	89.4855	90.4877	91.8187	92.5414	96.3708
13.68	64.2352	69.4402	79.3361	84.6942	86.2202	88.3468	88.71	89.2425			13.68	61.8982	68.7386	79.8415	85.0342	86.1098	86.9231	88.0499	89.2302			13.68	64.691	76.2506	85.4454	89.5113	90.4311	91.6978	92.4514	96.2872
13.78	64.2204	69.3899	79.2975	84.6806	86.1861	88.3103	88.6597	89.1938			13.78	61.9025	68.703	79.7878	85.0261	86.0253	86.8501	88.0049	89.1728			13.78	64.6463	76.2116	85.3964	89.4399	90.3566	91.6145	92.3907	96.1033
13.88	64.1218	69.349	79.2508	84.6306	86.1474	88.2575	88.5965	89.156			13.88	61.9205	68.6687	79.757	84.9559	85.9945	86.7965	87.9601	89.1133			13.88	64.611	76.1566	85.3504	89.4042	90.2972	91.5139	92.3084	95.9922
13.98	64.0963	69.2956	79.2274	84.6162	86.1023	88.2323	88.5422	89.1258			13.98	61.9093	68.6317	79.7264	84.9111	85.9339	86.7417	87.8759	89.072			13.98	64.5278	76.153	85.2935	89.3856	90.2703	91.4574	92.2448	95.8691
14.08	64.0488	69.2515	79.1871	84.5739	86.0461	88.1884	88.504	89.0726			14.08	61.8692	68.6018	79.6841	84.8892	85.8996	86.6677	87.8309	89.0033			14.08	64.5053	76.1264	85.2508	89.3542	90.1884	91.3647	92.178	95.7318
14.18	64.0068	69.2096	79.1422	84.54	85.9945	88.1235	88.4425	89.0247			14.18	61.8535	68.5534	79.6278	84.8445	85.8516	86.6277	87.7445	88.9804			14.18	64.4126	76.0999	85.2301	89.2856	90.1482	91.2719	92.0863	95.6607
14.28	63.9703	69.1604	79.1054	84.4994	85.9623	88.0569	88.3841	88.9968			14.28	61.8649	68.5122	79.5767	84.8007	85.7752	86.6072	87.6871	88.923			14.28	64.4061	76.1176	85.1986	89.2471	90.0665	91.1713	92.0241	95.5514
14.38	63.9429	69.1069	79.0569	84.4622	85.9144	88.0317	88.346	88.9374			14.38	61.8535	68.4992	79.5433	84.7651	85.7169	86.54	87.6288	88.8692			14.38	64.3708	76.1033	85.1558	89.1943	90.047	91.0927	91.9667	95.4368
14.48	63.91	69.0661	79.0103	84.4232	85.8913	87.9733	88.2763	88.8933			14.48	61.8381	68.4793	79.4832	84.7087	85.686	86.476	87.5839	88.8118			14.48	64.3901	76.0554	85.1163	89.1542	89.9966	90.9905	91.8657	95.3343
14.58	63.8662	69.0095	78.9879	84.3961	85.8545	87.9367	88.2204	88.8386			14.58	61.847	68.4296	79.4294	84.6799	85.6575	86.4419	87.5277	88.7237			14.58	64.3548	76.0199	85.0768	89.0901	89.9354	90.8883	91.7911	95.2388
14.68	63.8644	68.976	78.952	84.3665	85.7835	87.8985	88.1774	88.7969			14.68	61.7826	68.4139	79.4116	84.6237	85.6438	86.3848	87.429	88.6973			14.68	64.2843	75.9845	85.0167	89.0545	89.8923	90.8726	91.6871	95.1088
14.78	63.8534	68.935	78.9197	84.3443	85.7438	87.8571	88.0996	88.7474			14.78	61.7803	68.3769	79.3552	84.5936	85.6141	86.3119	87.3705	88.6365			14.78	64.2909	75.9525	84.9898	88.9973	89.8565	90.8287	91.6668	95.0115
14.88	63.8094	68.9078	78.8874	84.3054	85.6996	87.8263	88.046	88.7096			14.88	61.8159	68.3397	79.3297	84.5649	85.5946	86.2628	87.329	88.5908			14.88	64.2782	75.9046	84.974	88.9616	89.8089	90.8098	91.5754	94.9611
14.98	63.7912	68.8669	78.8712	84.2877	85.6545	87.8067	87.9967	88.6532			14.98	61.7535	68.3056	79.2823	84.5317	85.5946	86.2252	87.2437	88.5289			14.98	64.2429	75.8835	84.9155	88.9415	89.751	90.7706	91.5038	94.8918
15.08	63.751	68.8135	78.8308	84.2504	85.6278	87.7645	87.9748	88.5922			15.08	61.7578	68.2799	79.2337	84.4706	85.5571	86.1637	87.2279	88.5025			15.08	64.2782	75.8371	84.8584	88.8946	89.7315	90.7076	91.4541	94.8224
15.18	63.7274	68.804	78.7877	84.2055	85.5715	87.7215	87.9204	88.5127			15.18	61.7091	68.2302	79.217	84.4189	85.5376	86.1339	87.1628	88.4567			15.18	64.2429	75.7715	84.8126	88.8403	89.6496	90.7044	91.3921	94.7565
15.28	63.7437	68.7485	78.759	84.1733	85.5384	87.6687	87.8693	88.4702			15.28	61.6934	68.2231	79.2016	84.3891	85.4999	86.1226	87.1257	88.3936			15.28	64.2782	75.7626	84.7873	88.8017	89.6125	90.6368	91.3175	94.6714
15.38	63.7236	68.7118	78.7097	84.1352	85.4997	87.6444	87.8304	88.4331			15.38	61.6644	68.1902	79.1569	84.3339	85.4657	86.1033	87.0954	88.3477			15.38	64.2749	75.7486	84.7288	88.7674	89.5559	90.6038	91.2756	94.5827
15.48	63.6909	68.6805	78.6782	84.0768	85.4518	87.6159	87.8045	88.3644			15.48	61.6356	68.1704	79.121	84.3004	85.4382	86.0531	87.037	88.2951			15.48	64.2524	75.7095	84.6893	88.7332	89.5203	90.5897	91.2134	94.4752
15.58	63.6469	68.6332	78.6577	84.0615	85.426	87.5688	87.7981	88.3172			15.58	61.6199	68.1547	79.0904	84.2832	85.4485	86.0143	87.0079	88.2584			15.58	64.3003	75.6527	84.637	88.676	89.4368	90.511	91.1513	94.4041
15.68	63.6451	68.5829	78.6361	84.0124	85.3955	87.5281	87.7558	88.264			15.68	61.5821	68.1348	79.0699	84.2464	85.4097	85.9699	86.9887	88.2103			15.68	64.3229	75.6332	84.6101	88.6689	89.3818	90.4875	91.0704	94.3537
15.78	63.6818	68.5546	78.5975	83.965	85.3568	87.494	87.7137	88.2115			15.78	61.5533	68.1119	79.0289	84.212	85.3891	85.9287	86.9427	88.1105			15.78	64.3261	75.6085	84.5627	88.6333	89.3177	90.4672	90.9943	94.3277
15.88	63.656	68.5305	78.5678	83.9336	85.3338	87.4738	87.6943	88.186			15.88	61.5242	68.0665	79.0072	84.1568	85.3514	85.8979	86.9472	88.0498			15.88	64.2458	75.5621	84.5105	88.5647	89.2373	90.4483	90.9493	94.2112
15.98	63.6214	68.5022	78.5526	83.9007	85.3034	87.421	87.6514	88.1266			15.98	61.5242	68.0422	78.9739	84.1487	85.3205	85.8432	86.9248	87.9662			15.98	64.2429	75.5108	84.4835	88.5362	89.1733	90.3853	90.8793	94.1142
16.08	63.6287	68.4551	78.5302	83.8515	85.2766	87.3885	87.6116	88.1149			16.08	61.5265	68.0266	78.9611	84.1119	85.283	85.8273	86.9045	87.8757			16.08	64.2524	75.5001	84.444	88.4761	89.1541	90.3461	90.8048	94.0622
16.18	63.6542	68.4257	78.497	83.8143	85.237	87.3479	87.5613	88.0778			16.18	61.4975	68.0123	78.924	84.0775	85.2384	85.752	86.8506	87.8264			16.18	64.2298	75.4559	84.4092	88.4377	89.099	90.2833	90.7366	93.9771
16.28	63.6469	68.4142	78.4809	83.7847	85.2103	87.3089	87.5151	88.0362			16.28	61.4465	67.9923	78.8945	84.036	85.1722	85.7498	86.8315	87.7669			16.28	64.2044	75.4309	84.3521	88.4405	89.0125	90.2203	90.6698	93.8887
16.38	63.6542	68.3859	78.436	83.7499	85.1818	87.287	87.4819	88.0006			16.38	61.453	67.9597	78.8932	83.9877	85.1344	85.7076	86.7664	87.7415			16.38	64.1884	75.4114	84.3126	88.3862	88.9725	90.1654	90.6153	93.8487
16.48	63.6287	68.341	78.4153	83.716	85.1246	87.2448	87.4454	87.955			16.48	61.4243	67.9197	78.8601	83.9647	85.0728	85.6665	86.7227	87.6945			16.48	64.1946	75.3777	84.3096	88.3363	88.9129	90.1292	90.5533	93.7218
16.58	63.6268	68.3262	78.3804	83.6763	85.0823	87.2017	87.4114	87.9311			16.58	61.4376	67.9141	78.8458	83.9348	85.0032	85.6437	86.6912	87.6831			16.58	64.1564	75.3582	84.2511	88.2806	88.8683	90.0302	90.4571	93.6629
16.68	63.6268	68.2853	78.348	83.6321	85.0528	87.1627	87.3627	87.8987			16.68	61.3975	67.8926	78.7985	83.867	84.9586	85.5821	86.6541	87.6259			16.68	64.1499	75.3335	84.2067	88.2435	88.8192	89.9815	90.3903	93.5623
16.78	63.6067	68.2738	78.3086	83.5957	85.0315	87.1164	87.3061	87.8809			16.78	61.3596	67.8769	78.7641	83.8015	84.9254	85.5445	86.6485	87.5776			16.78	64.1564	75.2871	84.1814	88.2022	88.7611	89.9453	90.339	93.5154
16.88	63.5775	68.235	78.2762	83.5635	84.9865	87.0596	87.2542	87.8408			16.88	61.3642	67.8599	78.7307	83.76	84.8753	85.5319	86.6014	87.525			16.88	64.1626	75.289	84.1482	88.1835	88.697	89.8699	90.3125	93.4094
16.98	63.5684	68.2141	78.2448	83.5322	84.9606	87.0149	87.22	87.8006			16.98	61.3531	67.8414	78.7027	83.7497	84.7986	85.4738	86.5261	87.494			16.98	64.1499	75.2483	84.1006	88.1364	88.6479	89.8147	90.2254	93.295
17.08	63.5593	68.1869	78.2053	83.4882	84.9256	86.9727	87.1925	87.7535			17.08	61.324	67.8215	78.6514	83.683	84.7495	85.4328	86.452	87.4425			17.08	64.0827	75.2108	84.1022	88.0765	88.6227	89.73	90.1805	93.2255
17.18	63.5812	68.1387	78.1865	83.4493	84.9007	86.9434	87.1641	87.7002			17.18	61.3308	67.81	78.6399	83.6347	84.7073	85.3793	86.3634	87.4161			17.18	64.1146	75.1897	84.088	88.0293	88.6003	89.6624	90.0656	93.1457
17.28	63.5466	68.1009	78.1505	83.428	84.8528	86.9093	87.1236	87.6609			17.28	61.3083	67.7916	78.6091	83.6071	84.6491	85.345	86.2948	87.3623			17.28	64.0761	75.1559	84.0453	87.988	88.5513	89.6073	89.9584	93.0484
17.38	63.5539	68.0758	78.1291	83.3798	84.8086	86.8703	87.0588	87.6052			17.38	61.275	67.7602	78.5682	83.5657	84.6228	85.3051	86.2364	87.3107			17.38	64.0921	75.1559	84.023	87.9151	88.4753	89.5476	89.901	92.9251
17.48	63.5137	68.0486	78.0968	83.3485	84.7671	86.8338	87.0118	87.5527			17.48	61.2462	67.7147	78.5644	83.5071	84.576	85.2447	86.1825	87.2557			17.48	64.0827	75.1223	84.0058	87.8495	88.4217	89.4659	89.8574	92.8229
17.58	63.5172	68.0234	78.0617	83.312	84.7441	86.7957	86.9615	87.5149			17.58	61.2306	67.6919	78.5259	83.4668	84.5348	85.2094	86.1331	87.1995			17.58	64.1179	75.1082	83.9884	87.8009	88.3846	89.458	89.8	92.7638
17.68	63.5172	67.9961	78.0142	83.2773	84.7229	86.7388	86.9113	87.4624			17.68	61.2237	67.699	78.5017	83.4335	84.4789	85.2082	86.0815	87.1159			17.68	64.0921	75.0921	83.9394	87.7296	88.3577	89.3953	89.7533	92.6527
17.78	63.5099	67.9532	77.989	83.2376	84.6777	86.7144	86.8521	87.4083			17.78	61.226	67.6676	78.4748	83.3783	84.4241	85.1739	86.0208	87.0334			17.78	64.1146	75.0585	83.8777	87.7024	88.3175	89.3512	89.7067	92.5658
17.88	63.5137	67.9228	77.9603	83.1749	84.6473	86.6698	86.8131	87.3735			17.88	61.2149	67.6321	78.4467	83.3323	84.3841	85.1135	85.9299	86.9921			17.88	64.0921	75.0832	83.8507	87.6368	88.2714	89.2852	89.6367	92.5434
17.98	63.4898	67.9154	77.9352	83.1452	84.5865	86.6349	86.7694	87.3364			17.98	61.2237	67.6221	78.3955	83.2978	84.3532	85.1249	85.8771	86.944			17.98	64.1179	75.0408	83.8619	87.5811	88.203	89.2222	89.6322	92.4583
18.08	63.5099	67.8945	77.9002	83.1021	84.5597	86.5885	86.7402	87.2948			18.08	61.1639	67.6064	78.3546	83.2403	84.2984	85.0884	85.7906	86.9233			18.08	64.0761	75.0212	83.8001	87.5297	88.1716	89.1703	89.567	92.4045
18.18	63.4898	67.8703	77.8904	83.0648	84.5247	86.5382	86.6899	87.2554			18.18	61.1081	67.5608	78.3634	83.223	84.2414	85.0372	85.7502	86.8637			18.18	64.0827	74.9999	83.759	87.4669	88.0914	89.0856	89.5125	92.3003
18.28	63.4697	67.8452	77.8464	83.0453	84.4906	86.5033	86.6372	87.2045			18.28	61.1682	67.5608	78.3187	83.192	84.2094	84.9858	85.6895	86.803			18.28	64.0441	74.9679	83.6972	87.4268	88.0973	89.018	89.4302	92.2448
18.38	63.4405	67.8285	77.8302	82.9979	84.4427	86.4359	86.5886	87.1612			18.38	61.126	67.5481	78.2969	83.1621	84.1945	84.9505	85.6323	86.7927			18.38	64.0921	74.9431	83.6561	87.3799	88.0348	88.9599	89.3465	92.2101
18.48	63.4442	67.8138	77.7854	82.9623	84.4188	86.3953	86.5522	87.1063			18.48	61.1303	67.5351	78.2675	83.1218	84.1249	84.9095	85.5908	86.7456			18.48	64.0761	74.9502	83.6134	87.3512	87.9857	88.8875	89.2719	92.1406
18.58	63.4863	67.7865	77.7611	82.9166	84.3598	86.3311	86.5019	87.07			18.58	61.1081	67.5096	78.2381	83.0907	84.0643	84.8684	85.5682	86.7125			18.58	64.0601	74.9254	83.5818	87.2741	87.9395	88.7979	89.2174	92.0919
18.68	63.4533	67.7656	77.7468	82.9055	84.3294	86.2881	86.4905	87.0283			18.68	61.1015	67.504	78.2188	83.0505	84.0231	84.8147	85.5143	86.6667			18.68	64.038	74.9059	83.5581	87.2227	87.9037	88.7068	89.1661	92.0366
18.78	63.4863	67.7708	77.7082	82.8649	84.2926	86.2247	86.4411	86.9874			18.78	61.1038	67.4797	78.1651	83.0068	83.9934	84.7498	85.4448	86.6254			18.78	64.0282	74.8809	83.5453	87.1599	87.8784	88.6124	89.1351	91.9202
18.88	63.4681	67.7122	77.6849	82.8404	84.2593	86.163	86.4144	86.958			18.88	61.0525	67.4469	78.1485	82.9736	83.9478	84.7292	85.3976	86.5944			18.88	64.0347	74.8793	83.4996	87.1299	87.8412	88.504	89.0745	91.8542
18.98	63.4496	67.6974	77.6571	82.7938	84.2419	86.0972	86.3859	86.9086			18.98	61.0525	67.4256	78.1012	82.97	83.9068	84.687	85.3538	86.5429			18.98	63.9642	74.8348	83.4822	87.0842	87.8041	88.4632	88.9767	91.7536
19.08	63.4222	67.6828	77.6176	82.776	84.1976	86.0314	86.3227	86.8808			19.08	61.0192	67.4241	78.0922	82.9184	83.8451	84.646	85.3022	86.473			19.08	63.9544	74.7957	83.4362	87.0515	87.7549	88.3861	88.8944	91.672
19.18	63.437	67.6503	77.5996	82.7463	84.1728	85.9835	86.283	86.8507			19.18	60.997	67.4084	78.0627	82.8953	83.8176	84.613	85.273	86.4512			19.18	63.9576	74.739	83.4109	87.01	87.685	88.2823	88.8105	91.5714
19.28	63.3949	67.6147	77.5673	82.7125	84.1138	85.921	86.2377	86.8113			19.28	60.9634	67.39	78.0218	82.8861	83.7594	84.5719	85.2203	86.4111			19.28	63.8777	74.7194	83.373	86.9914	87.6359	88.2163	88.7484	91.4776
19.38	63.4169	67.6084	77.5385	82.6921	84.0714	85.8633	86.1793	86.7842			19.38	60.9301	67.3714	77.9885	82.8701	83.7136	84.5571	85.2033	86.3767			19.38	63.8359	74.6947	83.3317	86.9329	87.5957	88.1457	88.6816	91.389
19.48	63.404	67.5728	77.5044	82.6489	84.041	85.7903	86.1371	86.7194			19.48	60.9611	67.3516	77.9707	82.8286	83.6726	84.491	85.1472	86.3079			19.48	63.8265	74.6538	83.2574	86.8788	87.5629	88.0749	88.5838	91.3561
19.58	63.4169	67.535	77.4874	82.6142	84.0253	85.7562	86.082	86.6746			19.58	60.9748	67.333	77.9412	82.786	83.6441	84.4294	85.0933	86.2598			19.58	63.8425	74.6043	83.2369	86.8516	87.5242	88.0324	88.5681	91.2588
19.68	63.426	67.512	77.4641	82.5896	83.9792	85.7179	86.0553	86.6205			19.68	60.9412	67.3144	77.9053	82.7712	83.604	84.3759	85.0551	86.2129			19.68	63.772	74.6095	83.1989	86.8101	87.472	87.9994	88.5077	91.1826
19.78	63.4279	67.4984	77.438	82.5668	83.959	85.6627	86.0066	86.595			19.78	60.9369	67.3045	77.8925	82.7401	83.5446	84.3439	85.0147	86.1705			19.78	63.7498	74.5653	83.1705	86.733	87.4438	87.957	88.4516	91.1079
19.88	63.4314	67.4733	77.4121	82.5372	83.9148	85.6173	85.9628	86.5395			19.88	60.9258	67.2945	77.8644	82.7136	83.4967	84.2823	84.9821	86.0879			19.88	63.724	74.5173	83.1341	86.6588	87.368	87.9051	88.3786	91.0195
19.98	63.4187	67.4481	77.3824	82.5075	83.8769	85.5515	85.9077	86.4777			19.98	60.9346	67.3116	77.8234	82.6711	83.3961	84.2674	84.9417	86.0272			19.98	63.7142	74.5155	83.0756	86.6031	87.3099	87.8564	88.2963	90.9431
20.08	63.3949	67.4187	77.3608	82.4719	83.8503	85.5189	85.8469	86.422			20.08	60.9078	67.2974	77.8093	82.6228	83.3676	84.2368	84.9114	85.9505			20.08	63.6441	74.4535	83.0486	86.549	87.2162	87.795	88.2281	90.8995
20.18	63.3766	67.4041	77.3349	82.4372	83.8088	85.4857	85.7861	86.375			20.18	60.9078	67.2732	77.7684	82.5987	83.3163	84.1956	84.8721	85.9126			20.18	63.5957	74.402	83.0312	86.4675	87.1939	87.7685	88.1456	90.8093
20.28	63.371	67.3915	77.3142	82.4075	83.7599	85.445	85.7521	86.3047			20.28	60.8925	67.2546	77.7364	82.5653	83.2876	84.1501	84.8159	85.8369			20.28	63.5896	74.3825	82.9694	86.4161	87.1314	87.7369	88.0945	90.7347
20.38	63.3694	67.3653	77.2909	82.3864	83.724	85.4273	85.7043	86.2606			20.38	60.9013	67.2575	77.7083	82.5308	83.2191	84.1056	84.7732	85.7659			20.38	63.6121	74.3577	82.9158	86.3748	87.0999	87.693	88.0059	90.6776
20.48	63.3895	67.3548	77.2497	82.3432	83.6843	85.3785	85.6507	86.2267			20.48	60.9013	67.2433	77.6724	82.5009	83.1735	84.0781	84.7126	85.7498			20.48	63.5957	74.3205	82.8573	86.3375	87.0702	87.6771	87.9438	90.5785
20.58	63.3802	67.3265	77.2227	82.306	83.6632	85.3322	85.5956	86.2012			20.58	60.8745	67.2433	77.6468	82.4641	83.1187	84.0485	84.6834	85.6891			20.58	63.5863	74.2548	82.8113	86.299	86.9929	87.6584	87.8738	90.568
20.68	63.3729	67.2972	77.1877	82.289	83.618	85.3257	85.5267	86.1503			20.68	60.8301	67.1906	77.6149	82.4319	83.1027	84.011	84.6565	85.641			20.68	63.5637	74.1981	82.759	86.2776	86.8991	87.5814	87.8273	90.4829
20.78	63.3437	67.2783	77.1644	82.2475	83.5876	85.3029	85.4927	86.0853			20.78	60.8566	67.1992	77.579	82.4032	83.0593	83.9504	84.5857	85.6112			20.78	63.5736	74.2051	82.7402	86.2449	86.8589	87.5121	87.7728	90.4101
20.88	63.3219	67.2658	77.1545	82.2238	83.5499	85.2591	85.4327	86.0313			20.88	60.8301	67.2005	77.5508	82.3779	83.0558	83.889	84.5262	85.5288			20.88	63.5797	74.1536	82.6752	86.1777	86.7816	87.4745	87.6953	90.3823
20.98	63.3072	67.2447	77.0953	82.1916	83.5121	85.2258	85.3873	85.9896			20.98	60.8657	67.1906	77.5445	82.3468	83.0307	83.8684	84.469	85.5023			20.98	63.5318	74.134	82.612	86.1177	86.7576	87.4337	87.6518	90.3441
21.08	63.3	67.227	77.0962	82.162	83.4725	85.2111	85.3435	85.9409			21.08	60.8523	67.1693	77.5343	82.3031	83.0159	83.817	84.4218	85.4267			21.08	63.5383	74.095	82.5377	86.0664	86.7056	87.388	87.5585	90.3008
21.18	63.2635	67.207	77.0567	82.1188	83.4421	85.1779	85.2763	85.9116			21.18	60.8455	67.172	77.487	82.2835	82.9793	83.7772	84.3589	85.3362			21.18	63.5256	74.072	82.5154	86.0249	86.6075	87.3661	87.4949	90.2228
21.28	63.2378	67.1903	77.0397	82.0883	83.3941	85.1365	85.2446	85.8522			21.28	60.8255	67.1664	77.4742	82.2537	82.9428	83.7225	84.3196	85.2788			21.28	63.4998	74.0205	82.4616	85.9735	86.5493	87.3094	87.4235	90.1619
21.38	63.194	67.1735	77.0154	82.0629	83.3665	85.1031	85.1984	85.8096			21.38	60.8232	67.1507	77.4485	82.2376	82.9222	83.6997	84.2769	85.2457			21.38	63.4904	74.001	82.4033	85.9379	86.4912	87.2166	87.3333	90.0786
21.48	63.1812	67.1661	76.9939	82.0197	83.3213	85.078	85.1701	85.7657			21.48	60.8232	67.1336	77.4229	82.1824	82.888	83.6381	84.2342	85.2066			21.48	63.5256	73.9798	82.4	85.9035	86.4154	87.1287	87.279	90.0057
21.58	63.1665	67.1327	76.967	81.9765	83.2891	85.0366	85.1255	85.7147			21.58	60.7968	67.1193	77.3884	82.1536	82.8389	83.5663	84.1647	85.1311			21.58	63.5383	73.9231	82.3589	85.8566	86.3202	87.1114	87.2293	89.9242
21.68	63.1391	67.1211	76.9571	81.9528	83.2403	84.9895	85.0785	85.6668			21.68	60.7743	67.1264	77.3525	82.1215	82.8229	83.5059	84.1052	85.1013			21.68	63.4998	73.8858	82.3241	85.7809	86.2813	87.0532	87.1718	89.8531
21.78	63.1538	67.0877	76.9167	81.9104	83.1895	84.9578	85.0445	85.6142			21.78	60.7255	67.1193	77.3359	82.0926	82.7988	83.4876	84.0613	85.0737			21.78	63.5416	73.8379	82.2876	85.7665	86.1891	87.0108	87.0879	89.8182
21.88	63.119	67.0687	76.8889	81.8748	83.1582	84.9318	84.9982	85.5649			21.88	60.7298	67.1365	77.3232	82.0651	82.7703	83.4294	84.0378	85.0302			21.88	63.4904	73.8343	82.2419	85.7424	86.1445	86.9543	87.043	89.7504
21.98	63.1174	67.0572	76.8674	81.8333	83.1453	84.8871	84.9431	85.5177			21.98	60.7033	67.1051	77.2758	82.0444	82.7451	83.3861	83.9962	84.998			21.98	63.4518	73.7668	82.2006	85.7038	86.0731	86.9148	86.9543	89.6724
22.08	63.0935	67.0426	76.8503	81.8029	83.1177	84.8522	84.9107	85.4552			22.08	60.6743	67.1024	77.254	82.0042	82.7086	83.3725	83.94	84.9225			22.08	63.4904	73.7439	82.1627	85.6309	86.0031	86.8537	86.9217	89.6238
22.18	63.0753	67.0509	76.8378	81.7707	83.0762	84.8206	84.8855	85.3918			22.18	60.7275	67.1009	77.2054	81.9846	82.6744	83.3348	83.9344	84.8949			22.18	63.5543	73.7049	82.1183	85.6167	85.9241	86.8488	86.8613	89.5267
22.28	63.0825	67.0341	76.81	81.747	83.0486	84.8019	84.8425	85.3679			22.28	60.7187	67.0809	77.1708	81.9547	82.6504	83.2927	83.8581	84.8332			22.28	63.5416	73.6817	82.0819	85.5395	85.8884	86.8128	86.8052	89.4589
22.38	63.0498	67.0069	76.7785	81.7071	83.0182	84.771	84.811	85.3255			22.38	60.6854	67.0411	77.1504	81.9259	82.6082	83.2448	83.8199	84.754			22.38	63.5158	73.6569	82.0756	85.5253	85.8498	86.7279	86.7213	89.3894
22.48	63.0021	66.9651	76.7283	81.6801	82.9776	84.7304	84.7607	85.2838			22.48	60.6785	67.0054	77.1094	81.9007	82.551	83.1866	83.7795	84.7529			22.48	63.4678	73.6817	82.0345	85.4639	85.8319	86.6555	86.6545	89.3201
22.58	62.9967	66.9566	76.7309	81.6496	82.9408	84.6784	84.717	85.2289			22.58	60.6632	67.0297	77.0927	81.8833	82.5282	83.1752	83.7211	84.7059			22.58	63.4678	73.7012	81.9997	85.4096	85.7694	86.6289	86.6267	89.2941
22.68	62.9675	66.9357	76.7058	81.6182	82.914	84.6249	84.6626	85.1934			22.68	60.6654	66.9912	77.0647	81.8719	82.4734	83.1467	83.7042	84.6899			22.68	63.458	73.6551	81.9491	85.3541	85.7158	86.5692	86.5692	89.2108
22.78	62.9694	66.922	76.6753	81.5911	82.8828	84.5931	84.6335	85.1517			22.78	60.6831	66.9983	77.0429	81.8546	82.4197	83.0942	83.6537	84.6313			22.78	63.4678	73.6426	81.9316	85.2954	85.6831	86.5314	86.4915	89.1257
22.88	62.9418	66.9146	76.6547	81.5412	82.8625	84.542	84.5816	85.1084			22.88	60.6207	66.9726	76.9943	81.8028	82.3911	83.0418	83.5942	84.5889			22.88	63.4293	73.5929	81.8968	85.2612	85.6354	86.4905	86.4217	89.051
22.98	62.9291	66.8832	76.6537	81.5192	82.8043	84.5095	84.5306	85.0528			22.98	60.5675	66.9527	76.9776	81.7627	82.3477	82.9814	83.5359	84.5454			22.98	63.3879	73.5718	81.8527	85.1883	85.5968	86.4292	86.3704	89.011
23.08	62.9383	66.8549	76.6125	81.487	82.7951	84.473	84.4851	85.0296			23.08	60.5629	66.9414	76.9494	81.7282	82.2895	82.9449	83.4717	84.5089			23.08	63.4133	73.5681	81.8304	85.1412	85.5387	86.3883	86.274	88.8602
23.18	62.9109	66.8382	76.5991	81.4675	82.7675	84.4315	84.4479	84.9833			23.18	60.5675	66.9172	76.9084	81.6821	82.2506	82.9221	83.4482	84.4263			23.18	63.442	73.5541	81.8369	85.0927	85.5223	86.3272	86.1903	88.8202
23.28	62.8836	66.8329	76.5667	81.4116	82.7279	84.408	84.4049	84.9601			23.28	60.5407	66.9157	76.8816	81.6362	82.2107	82.8845	83.3875	84.3713			23.28	63.3879	73.5486	81.8146	85.0471	85.4821	86.2909	86.1064	88.7264
23.38	62.8742	66.8131	76.5577	81.3803	82.6892	84.369	84.3627	84.9285			23.38	60.5139	66.863	76.8624	81.5959	82.1661	82.8423	83.3506	84.3232			23.38	63.3781	73.5273	81.8004	84.9957	85.4524	86.2658	86.0799	88.6258
23.48	62.8616	66.812	76.5362	81.3372	82.6597	84.3252	84.3133	84.8953			23.48	60.5074	66.8275	76.8318	81.55	82.1364	82.7795	83.2909	84.2762			23.48	63.3879	73.4973	81.7387	84.9542	85.4032	86.1857	86.0441	88.5911
23.58	62.8324	66.79	76.5084	81.3024	82.6191	84.2724	84.2687	84.8458			23.58	60.4629	66.8175	76.7728	81.535	82.0965	82.7715	83.2214	84.2189			23.58	63.3813	73.5007	81.7245	84.9171	85.3377	86.1417	85.9867	88.5078
23.68	62.8104	66.7857	76.4932	81.2821	82.5814	84.209	84.233	84.7949			23.68	60.4293	66.7847	76.7486	81.5063	82.0543	82.7054	83.1483	84.1363			23.68	63.3395	73.4741	81.715	84.8872	85.3438	86.063	85.9402	88.4209
23.78	62.8141	66.7543	76.4644	81.2473	82.5261	84.1879	84.2055	84.7547			23.78	60.4293	66.7633	76.7319	81.4637	82.0063	82.6598	83.0979	84.1134			23.78	63.3076	73.451	81.6943	84.8386	85.3184	85.997	85.8656	88.3272
23.88	62.7667	66.7293	76.433	81.2202	82.4763	84.1384	84.1268	84.7154			23.88	60.3627	66.7447	76.6781	81.4176	81.972	82.6336	83.0339	84.0791			23.88	63.3076	73.4121	81.6581	84.7858	85.2365	85.964	85.8282	88.1919
23.98	62.7683	66.723	76.4052	81.1702	82.445	84.1019	84.0758	84.6589			23.98	60.3404	66.7349	76.6487	81.3602	81.9309	82.5629	82.9766	84.0424			23.98	63.2596	73.3853	81.6453	84.7315	85.1919	85.8666	85.7491	88.119
24.08	62.7739	66.7073	76.399	81.1304	82.4016	84.0547	84.0393	84.6141			24.08	60.3404	66.7249	76.5975	81.312	81.8886	82.5264	82.907	83.9724			24.08	63.2821	73.3624	81.6358	84.6858	85.174	85.8351	85.704	88.013
24.18	62.7465	66.7062	76.3585	81.1042	82.3602	83.9995	83.972	84.5894			24.18	60.3071	66.7136	76.5962	81.2855	81.8623	82.4853	82.862	83.8991			24.18	63.2916	73.3377	81.5995	84.6502	85.1205	85.7409	85.6714	87.9262
24.28	62.7281	66.6831	76.3388	81.0653	82.3105	83.9589	83.9258	84.5547			24.28	60.3026	66.7092	76.5399	81.2487	81.8179	82.4568	82.806	83.8236			24.28	63.2854	73.3109	81.5536	84.5959	85.0506	85.7204	85.6171	87.8326
24.38	62.7227	66.6664	76.2948	81.044	82.2681	83.9126	83.8674	84.5215			24.38	60.3071	66.6778	76.5016	81.2188	81.7835	82.4295	82.7442	83.7869			24.38	63.2916	73.2702	81.4934	84.5659	85.0088	85.6984	85.5332	87.7458
24.48	62.7208	66.6548	76.2804	81.0009	82.2257	83.8582	83.8164	84.4705			24.48	60.3003	66.6565	76.4568	81.2073	81.7538	82.3862	82.7183	83.7169			24.48	63.2694	73.2507	81.446	84.5003	84.973	85.6339	85.4354	87.6173
24.58	62.6862	66.6381	76.2643	80.9704	82.1797	83.8249	83.7612	84.4249			24.58	60.2849	66.6423	76.4401	81.1532	81.7173	82.3258	82.6576	83.6355			24.58	63.2436	73.2223	81.397	84.4746	84.9463	85.5868	85.4167	87.5842
24.68	62.6551	66.637	76.2409	80.9552	82.1299	83.773	83.7094	84.3809			24.68	60.2781	66.6423	76.4223	81.1164	81.6717	82.2722	82.6319	83.5691			24.68	63.3301	73.2223	81.3717	84.4075	84.857	85.5254	85.3531	87.5009
24.78	62.6278	66.6181	76.2024	80.9238	82.0857	83.729	83.6615	84.34			24.78	60.2627	66.6281	76.3838	81.0612	81.6397	82.2242	82.5869	83.5061			24.78	63.2916	73.1991	81.3241	84.3503	84.8153	85.4846	85.3034	87.4367
24.88	62.6095	66.5971	76.1853	80.8789	82.0349	83.6901	83.6064	84.3022			24.88	60.2291	66.5854	76.3442	81.0291	81.6031	82.19	82.5307	83.4464			24.88	63.3301	73.2028	81.2784	84.3318	84.7722	85.45	85.2334	87.3516
24.98	62.5602	66.5878	76.1566	80.8392	81.9926	83.6559	83.544	84.242			24.98	60.2738	66.5668	76.3199	80.9923	81.5574	82.1604	82.5162	83.4166			24.98	63.3395	73.1851	81.2166	84.2975	84.741	85.3794	85.1556	87.2319
25.08	62.5345	66.571	76.1342	80.8137	81.9346	83.5999	83.5026	84.1902			25.08	60.2849	66.5355	76.2994	80.9347	81.514	82.0898	82.4635	83.3869			25.08	63.3076	73.1637	81.2055	84.2248	84.6754	85.3667	85.1123	87.2025
25.18	62.5328	66.549	76.1163	80.7841	81.894	83.5658	83.4516	84.1523			25.18	60.2291	66.5355	76.2713	80.8979	81.4717	82.0418	82.4073	83.3536			25.18	63.2981	73.1512	81.1692	84.2034	84.6442	85.2929	85.0391	87.1765
25.28	62.509	66.529	76.0983	80.7401	81.8755	83.5244	83.4029	84.1014			25.28	60.2069	66.4999	76.2392	80.8738	81.4352	82.0007	82.3567	83.3285			25.28	63.3076	73.1814	81.1486	84.1476	84.5668	85.2426	84.9568	87.1314
25.38	62.4908	66.5218	76.0759	80.7053	81.8377	83.4805	83.3462	84.0527			25.38	60.1735	66.4928	76.2072	80.8404	81.3976	81.9586	82.3006	83.254			25.38	63.3014	73.1583	81.1328	84.1147	84.5474	85.1828	84.8839	87.0341
25.48	62.4634	66.5028	76.0507	80.6968	81.8092	83.4335	83.2976	84.0172			25.48	60.169	66.4642	76.1854	80.7875	81.3518	81.9015	82.2535	83.1966			25.48	63.2596	73.146	81.087	84.072	84.5118	85.1325	84.8389	86.9977
25.58	62.4852	66.4913	76.0184	80.6639	81.7631	83.3879	83.2328	83.974			25.58	60.1735	66.4216	76.1561	80.7658	81.3198	81.8719	82.2108	83.0935			25.58	63.2596	73.0926	81.0348	84.0548	84.4552	85.0995	84.7751	86.9681
25.68	62.5053	66.4525	75.9852	80.6384	81.7355	83.3368	83.2124	83.943			25.68	60.1402	66.3902	76.1394	80.7106	81.2833	81.8503	82.1714	83.0477			25.68	63.2116	73.107	81.0269	84.0248	84.4135	85.0649	84.7395	86.9508
25.78	62.4908	66.4379	75.9502	80.6037	81.6977	83.3051	83.1743	83.896			25.78	60.118	66.3505	76.124	80.6668	81.2296	81.8138	82.1401	83.0328			25.78	63.2182	73.0874	81.0109	83.9978	84.3776	84.9754	84.6866	86.8988
25.88	62.4358	66.417	75.9153	80.5867	81.683	83.2735	83.129	83.8557			25.88	60.118	66.3461	76.0947	80.6495	81.2011	81.742	82.1041	83.042			25.88	63.1797	73.107	80.9746	83.9463	84.3018	84.9189	84.654	86.8346
25.98	62.4578	66.4253	75.891	80.5639	81.6461	83.262	83.0868	83.8187			25.98	60.0847	66.3147	76.0383	80.6069	81.1577	81.6941	82.0423	82.9904			25.98	63.1477	73.0661	80.9445	83.8907	84.2437	84.8575	84.5733	86.772
26.08	62.4452	66.4001	75.8605	80.5258	81.6359	83.2158	83.0568	83.7963			26.08	60.051	66.2792	76.028	80.5587	81.1119	81.6643	81.9861	82.9503			26.08	63.0997	73.0431	80.927	83.8321	84.2125	84.7742	84.5314	86.7286
26.18	62.4452	66.3761	75.8318	80.5089	81.6018	83.1719	83.0074	83.7453			26.18	59.9955	66.255	75.9961	80.5288	81.0685	81.5937	81.9469	82.9251			26.18	63.0997	73.0182	80.8813	83.8079	84.1351	84.7191	84.4675	86.6818
26.28	62.4452	66.3593	75.8021	80.4834	81.5622	83.1175	82.9749	83.6898			26.28	59.9442	66.2364	75.9795	80.492	81.0571	81.5709	81.8941	82.8587			26.28	63.0932	73.0041	80.8481	83.7679	84.1157	84.6201	84.4055	86.6678
26.38	62.4176	66.3561	75.7663	80.4369	81.5281	83.0737	82.919	83.6488			26.38	59.9442	66.2221	75.9602	80.4575	81.0035	81.5231	81.8402	82.8094			26.38	63.0612	72.9809	80.8132	83.7264	84.0578	84.5352	84.3791	86.5742
26.48	62.4176	66.33	75.7303	80.4131	81.5032	83.0469	82.8801	83.6187			26.48	59.9511	66.2008	75.932	80.4184	80.9579	81.4797	81.7784	82.7841			26.48	63.0194	72.9507	80.7926	83.6508	83.9966	84.4943	84.3015	86.548
26.58	62.3993	66.308	75.6783	80.3801	81.4839	83.0038	82.8274	83.5554			26.58	59.9687	66.1653	75.9001	80.3541	80.9292	81.4193	81.7448	82.7291			26.58	63.0481	72.9278	80.7626	83.6181	83.9387	84.4362	84.2548	86.5029
26.68	62.3921	66.3038	75.6479	80.3463	81.4471	82.9453	82.7967	83.5136			26.68	59.9733	66.1496	75.8682	80.2965	80.8722	81.3907	81.6808	82.658			26.68	63.0674	72.8939	80.7262	83.5623	83.9075	84.3765	84.2268	86.4318
26.78	62.3975	66.2755	75.6541	80.309	81.4249	82.8983	82.7529	83.4789			26.78	59.94	66.1368	75.8362	80.2678	80.8435	81.3542	81.6179	82.5527			26.78	62.9874	72.8533	80.6818	83.5466	83.8642	84.2791	84.1818	86.3641
26.88	62.3993	66.2546	75.6308	80.2701	81.3991	82.8771	82.7172	83.4311			26.88	59.9664	66.0869	75.8144	80.2494	80.8071	81.3087	81.5955	82.477			26.88	62.9874	72.8656	80.6597	83.4909	83.821	84.2523	84.1383	86.3225
26.98	62.3739	66.2514	75.6056	80.2454	81.3853	82.8398	82.6718	83.3847			26.98	59.9733	66.0656	75.7722	80.2103	80.7614	81.2722	81.5426	82.4094			26.98	62.9395	72.8444	80.6075	83.4538	83.7497	84.2115	84.0576	86.2339
27.08	62.3573	66.2241	75.5796	80.1879	81.3531	82.7967	82.6126	83.3484			27.08	59.94	66.0626	75.7402	80.1701	80.7089	81.2482	81.4809	82.3406			27.08	62.9075	72.8177	80.5631	83.4039	83.7139	84.1501	84.0172	86.1732
27.18	62.3264	66.2095	75.5616	80.1548	81.2932	82.7472	82.5624	83.2936			27.18	59.9086	66.0229	75.6852	80.1355	80.6586	81.2369	81.4079	82.3143			27.18	62.8595	72.7877	80.5285	83.341	83.6617	84.0936	83.9443	86.121
27.28	62.3264	66.1969	75.5132	80.1235	81.2886	82.7188	82.5048	83.2403			27.28	59.9331	66.0229	75.6672	80.1228	80.6289	81.1776	81.3517	82.2684			27.28	62.8272	72.7681	80.5062	83.2868	83.5843	84.0354	83.8556	86.0535
27.38	62.2843	66.1989	75.4997	80.0897	81.26	82.6798	82.4732	83.2008			27.38	59.94	65.9702	75.6275	80.0838	80.5867	81.1376	81.2956	82.2134			27.38	62.8177	72.7557	80.4605	83.2539	83.5129	83.9757	83.7997	85.9735
27.48	62.3026	66.1947	75.4657	80.0727	81.213	82.6513	82.4376	83.1469			27.48	59.9066	65.9659	75.6084	80.0378	80.5295	81.076	81.2485	82.1538			27.48	62.805	72.7325	80.402	83.234	83.4624	83.9192	83.722	85.9179
27.58	62.2824	66.1707	75.4225	80.0439	81.1825	82.5897	82.3825	83.1051			27.58	59.9066	65.9303	75.5738	79.9976	80.4896	81.0544	81.2226	82.0817			27.58	62.7792	72.7114	80.3623	83.1969	83.391	83.8343	83.7003	85.8537
27.68	62.299	66.1655	75.4225	80.004	81.1457	82.5474	82.3208	83.0387			27.68	59.9066	65.9117	75.5419	79.947	80.4439	80.9836	81.1664	82.0255			27.68	62.7312	72.6669	80.3418	83.1654	83.3344	83.7634	83.6444	85.7826
27.78	62.2715	66.1644	75.3857	79.9711	81.1061	82.5019	82.2924	82.997			27.78	59.9109	65.8733	75.4906	79.9171	80.4232	80.9267	81.1216	81.9784			27.78	62.6993	72.6812	80.2991	83.1055	83.3134	83.7101	83.5715	85.7444
27.88	62.2387	66.1455	75.3643	79.9287	81.0592	82.4645	82.2292	82.9576			27.88	59.8841	65.8377	75.4459	79.8848	80.3696	80.8948	81.0654	81.896			27.88	62.7312	72.658	80.2596	83.047	83.257	83.6771	83.4985	85.6871
27.98	62.2095	66.1309	75.3292	79.9118	80.9983	82.4142	82.1935	82.9097			27.98	59.8841	65.7879	75.4138	79.8688	80.324	80.864	81.0227	81.8674			27.98	62.7218	72.6137	80.2169	82.994	83.2153	83.619	83.4424	85.6142
28.08	62.1985	66.1098	75.3373	79.872	80.9512	82.3761	82.144	82.8657			28.08	59.8018	65.7522	75.3922	79.8296	80.2931	80.8241	80.9643	81.8135			28.08	62.7251	72.5695	80.1756	82.9556	83.1572	83.5482	83.3727	85.55
28.18	62.1838	66.1026	75.2951	79.8432	80.9181	82.3021	82.0963	82.8171			28.18	59.8286	65.7637	75.3627	79.7733	80.2326	80.7841	80.9251	81.7207			28.18	62.6575	72.5429	80.1409	82.9228	83.1126	83.5357	83.3043	85.4876
28.28	62.162	66.0774	75.2727	79.8169	80.8693	82.2721	82.0647	82.7762			28.28	59.7953	65.7338	75.3114	79.7446	80.1926	80.7272	80.8689	81.6817			28.28	62.6513	72.5463	80.1012	82.8827	83.1006	83.4743	83.2484	85.4111
28.38	62.1344	66.0628	75.2548	79.7831	80.8112	82.2461	82.0177	82.7298			28.38	59.773	65.6953	75.2949	79.7285	80.1491	80.6667	80.8318	81.6381			28.38	62.571	72.5127	80.0506	82.8584	83.0663	83.4146	83.2094	85.3227
28.48	62.1344	66.0397	75.2323	79.7543	80.7846	82.1982	81.9892	82.6905			28.48	59.7397	65.6768	75.2475	79.6929	80.1069	80.6337	80.8071	81.5717			28.48	62.6095	72.4718	80.0332	82.8186	83.0233	83.3784	83.1257	85.255
28.58	62.1309	66.0219	75.2027	79.7001	80.744	82.143	81.9569	82.6425			28.58	59.7397	65.6454	75.2066	79.6468	80.0589	80.5789	80.751	81.5373			28.58	62.571	72.4754	79.9937	82.7629	82.9846	83.2904	83.0697	85.2221
28.68	62.12	66.0125	75.1633	79.673	80.6814	82.1138	81.9099	82.6032			28.68	59.6839	65.5927	75.1771	79.6031	80.0179	80.5048	80.706	81.5007			28.68	62.5488	72.463	79.9352	82.74	82.9518	83.2526	83.0216	85.1976
28.78	62.0889	65.9988	75.1579	79.6467	80.6527	82.0926	81.8742	82.5475			28.78	59.6839	65.5459	75.1452	79.5986	79.9984	80.4683	80.6668	81.4548			28.78	62.539	72.4187	79.9194	82.6843	82.8952	83.1836	82.9609	85.1474
28.88	62.0889	66.002	75.1211	79.5993	80.6104	82.0488	81.8491	82.5035			28.88	59.6685	65.5486	75.1131	79.5434	79.9414	80.425	80.6309	81.3952			28.88	62.491	72.4187	79.8925	82.6686	82.8402	83.1269	82.9112	85.0797
28.98	62.1036	65.98	75.1085	79.5722	80.5726	82.0065	81.8142	82.4602			28.98	59.6728	65.543	75.0723	79.5111	79.8842	80.3816	80.6185	81.3345			28.98	62.491	72.3742	79.8688	82.5944	82.7956	83.0844	82.885	85.019
29.08	62.0835	65.9716	75.0887	79.5459	80.5449	81.9651	81.7696	82.4309			29.08	59.6773	65.5101	75.0428	79.4743	79.8443	80.3247	80.577	81.2771			29.08	62.507	72.3619	79.8514	82.5902	82.7657	83.0484	82.8289	84.9512
29.18	62.1017	65.9402	75.0635	79.5069	80.4915	81.9245	81.7372	82.3784			29.18	59.6551	65.4959	75.0107	79.411	79.7986	80.2882	80.5658	81.2199			29.18	62.523	72.321	79.7928	82.5602	82.7316	82.9933	82.7714	84.9061
29.28	62.0706	65.9317	75.0358	79.4655	80.4583	81.8929	81.7023	82.3344			29.28	59.6796	65.4604	74.9787	79.3709	79.7278	80.2347	80.5208	81.1854			29.28	62.4525	72.2713	79.7896	82.5187	82.6765	82.9903	82.7404	84.8384
29.38	62.0669	65.9192	75.0367	79.4265	80.4095	81.8497	81.6699	82.2957			29.38	59.6839	65.4389	74.9468	79.3249	79.6923	80.1537	80.4736	81.1545			29.38	62.3951	72.2536	79.7485	82.473	82.6289	82.9132	82.6704	84.7533
29.48	62.0706	65.8962	75.0115	79.3851	80.3965	81.8254	81.6261	82.2402			29.48	59.6728	65.4418	74.8828	79.2674	79.6695	80.1205	80.4309	81.0961			29.48	62.4431	72.2411	79.7137	82.4502	82.6125	82.8629	82.5881	84.6822
29.58	62.065	65.8742	74.9748	79.3435	80.367	81.7864	81.5897	82.1776			29.58	59.6773	65.4033	74.8469	79.2213	79.6101	80.0658	80.3747	81.0537			29.58	62.4111	72.2145	79.6505	82.4102	82.5544	82.811	82.551	84.6371
29.68	62.0213	65.8626	74.9371	79.3198	80.3394	81.728	81.5604	82.1298			29.68	59.6839	65.4062	74.8187	79.195	79.5702	80.034	80.3208	81.017			29.68	62.3631	72.1843	79.6298	82.3588	82.5098	82.7466	82.5106	84.5762
29.78	62.0122	65.827	74.911	79.2767	80.2933	81.6735	81.5102	82.068			29.78	59.6839	65.3891	74.7714	79.1524	79.5245	80.0008	80.2996	80.977			29.78	62.3533	72.188	79.5476	82.3016	82.4532	82.6633	82.45	84.5571
29.88	61.9883	65.806	74.8689	79.2232	80.2427	81.6159	81.4615	82.0293			29.88	59.6839	65.3393	74.7165	79.1121	79.4765	79.9518	80.2457	80.9299			29.88	62.3312	72.1559	79.5207	82.2304	82.3967	82.6131	82.4096	84.4982
29.98	62.0103	65.7945	74.8465	79.2097	80.2058	81.5696	81.417	81.9931			29.98	59.6839	65.3036	74.6806	79.0662	79.4331	79.9142	80.2142	80.8806			29.98	62.2828	72.1437	79.4684	82.2117	82.3788	82.5392	82.3366	84.4356
30.08	61.9883	65.7714	74.8213	79.1699	80.1939	81.5087	81.3764	81.9575			30.08	59.6506	65.261	74.6716	79.0201	79.376	79.8629	80.1727	80.8509			30.08	62.2029	72.0992	79.4241	82.1589	82.3624	82.4825	82.3024	84.3854
30.18	61.9883	65.7704	74.7989	79.1267	80.1413	81.4599	81.3456	81.9119			30.18	59.6796	65.258	74.6397	78.9718	79.3441	79.8298	80.1367	80.8475			30.18	62.1164	72.0939	79.3658	82.1375	82.294	82.4668	82.2466	84.3438
30.28	61.9701	65.7693	74.7773	79.0819	80.1008	81.4056	81.3003	81.8625			30.28	59.6839	65.2509	74.6077	78.9281	79.3109	79.7751	80.0828	80.8039			30.28	62.075	72.0692	79.3498	82.0776	82.2448	82.4054	82.1891	84.2985
30.38	61.9921	65.741	74.7191	79.0581	80.0777	81.3455	81.254	81.8116			30.38	59.6773	65.2396	74.5668	78.8971	79.2961	79.7317	80.0604	80.7306			30.38	62.075	72.0283	79.3056	82.0476	82.1703	82.3459	82.1052	84.2569
30.48	61.9701	65.739	74.7118	79.0268	80.0455	81.2878	81.1989	81.7629			30.48	59.6839	65.2139	74.5373	78.8672	79.247	79.7009	79.9986	80.672			30.48	62.0266	72.0158	79.2708	81.9948	82.1362	82.2734	82.071	84.1945
30.58	61.9518	65.7347	74.6885	78.9955	80.0049	81.265	81.1608	81.7204			30.58	59.6839	65.1826	74.5054	78.8247	79.2081	79.6633	79.9559	80.5896			30.58	62.0266	71.9752	79.2311	81.9349	82.093	82.2248	81.9949	84.1423
30.68	61.9556	65.6897	74.6723	78.9488	79.9754	81.1863	81.1057	81.6848			30.68	59.6349	65.147	74.4887	78.8074	79.1671	79.6326	79.9032	80.5323			30.68	61.9946	71.9343	79.1758	81.8806	81.9992	82.1777	81.9561	84.0748
30.78	61.9537	65.6855	74.6445	78.9268	79.9368	81.153	81.0554	81.6301			30.78	59.6215	65.137	74.4759	78.7499	79.1134	79.5767	79.8784	80.4613			30.78	61.9467	71.9218	79.1124	81.8263	81.9427	82.0896	81.8784	83.9775
30.88	61.9317	65.6541	74.6212	78.8955	79.8897	81.1214	81.0003	81.5822			30.88	59.6016	65.1044	74.4387	78.6901	79.0733	79.5357	79.8212	80.4085			30.88	61.9147	71.8687	79.073	81.7949	81.8876	82.055	81.8442	83.9479
30.98	61.9336	65.6342	74.5862	78.8531	79.8649	81.0734	80.9541	81.5459			30.98	59.5617	65.0902	74.4094	78.6602	79.0391	79.4787	79.7853	80.3203			30.98	61.8922	71.851	79.0335	81.7763	81.8474	82.0204	81.7806	83.9081
31.08	61.9299	65.6101	74.5459	78.8109	79.8538	81.0458	80.9023	81.5197			31.08	59.5617	65.0858	74.3927	78.6177	78.9934	79.449	79.7123	80.2722			31.08	61.8987	71.8065	78.9828	81.7207	81.7908	81.9511	81.7338	83.8439
31.18	61.9063	65.5639	74.5108	78.7896	79.8225	80.9955	80.8342	81.4849			31.18	59.5215	65.0758	74.3645	78.5602	78.9614	79.4102	79.6864	80.2629			31.18	61.8668	71.7533	78.9464	81.6522	81.7685	81.8664	81.6609	83.7917
31.28	61.8789	65.5566	74.4651	78.754	79.7828	80.9459	80.8026	81.4555			31.28	59.4683	65.0331	74.2941	78.5279	78.8963	79.3623	79.6168	80.1713			31.28	61.8508	71.7302	78.8832	81.6264	81.7165	81.8302	81.5957	83.7275
31.38	61.9006	65.5545	74.4597	78.7125	79.7533	80.9037	80.7766	81.4046			31.38	59.4503	64.9976	74.2276	78.4854	78.8529	79.3076	79.5854	80.1141			31.38	61.7864	71.6913	78.8435	81.5594	81.654	81.761	81.5521	83.7033
31.48	61.8843	65.5189	74.4184	78.6838	79.7248	80.859	80.7199	81.3682			31.48	59.417	65.0388	74.1919	78.4452	78.8106	79.2621	79.5417	80.0532			31.48	61.7704	71.6645	78.7929	81.5237	81.578	81.7013	81.5165	83.6269
31.58	61.8478	65.4864	74.3888	78.6567	79.6806	80.8347	80.6874	81.325			31.58	59.417	64.9875	74.1943	78.4199	78.7719	79.2141	79.4708	80.0224			31.58	61.7704	71.6346	78.7755	81.4665	81.5378	81.6415	81.4326	83.5504
31.68	61.8459	65.4875	74.3458	78.5991	79.6299	80.7795	80.6388	81.2772			31.68	59.3612	64.9476	74.147	78.3819	78.7273	79.1709	79.4281	79.9364			31.68	61.7225	71.6346	78.7249	81.3951	81.4262	81.5834	81.3581	83.4827
31.78	61.7912	65.4507	74.3197	78.5712	79.5875	80.738	80.6015	81.2408			31.78	59.3612	64.9121	74.1252	78.336	78.6851	79.116	79.3979	79.9455			31.78	61.7385	71.6114	78.6617	81.3594	81.3844	81.5536	81.2571	83.4151
31.88	61.7837	65.4444	74.2964	78.5152	79.5341	80.6998	80.5667	81.1968			31.88	59.399	64.9021	74.0829	78.3095	78.6507	79.0738	79.3676	79.8929			31.88	61.713	71.5671	78.6348	81.3194	81.3145	81.4971	81.2028	83.3491
31.98	61.7601	65.4215	74.2703	78.5034	79.4917	80.6544	80.5294	81.1265			31.98	59.3726	64.905	74.0345	78.2555	78.588	79.0283	79.3081	79.8767			31.98	61.6266	71.5705	78.5351	81.2666	81.2551	81.4609	81.1748	83.2832
32.08	61.7419	65.39	74.2694	78.4568	79.4483	80.6153	80.5083	81.0825			32.08	59.3389	64.8692	74.0024	78.2094	78.556	78.9735	79.2351	79.8619			32.08	61.6266	71.544	78.4908	81.2039	81.1777	81.4027	81.1141	83.2329
32.18	61.7419	65.369	74.2165	78.4153	79.4152	80.5691	80.4532	81.0469			32.18	59.3347	64.855	73.9359	78.152	78.5286	78.9233	79.1924	79.8355			32.18	61.5786	71.5315	78.4323	81.174	81.1537	81.3399	81.0163	83.1565
32.28	61.751	65.3292	74.1959	78.3933	79.3719	80.5431	80.4118	80.9983			32.28	59.3389	64.8366	73.9039	78.1485	78.4852	78.8595	79.1396	79.7909			32.28	61.5462	71.4872	78.3721	81.1509	81.1017	81.2613	80.996	83.1148
32.38	61.7601	65.3146	74.1725	78.3552	79.3323	80.5106	80.3567	80.9466			32.38	59.2834	64.8224	73.8821	78.0772	78.4532	78.8207	79.1093	79.7724			32.38	61.5462	71.4429	78.2978	81.1067	81.0436	81.1953	80.9231	83.0488
32.48	61.7218	65.2884	74.1267	78.3247	79.3028	80.4587	80.3251	80.8995			32.48	59.2566	64.8166	73.8526	78.0371	78.4132	78.7774	79.0891	79.7324			32.48	61.4983	71.4039	78.2583	81.0212	80.9946	81.1386	80.8378	82.9899
32.58	61.7108	65.2475	74.1285	78.2773	79.2567	80.4286	80.2772	80.8415			32.58	59.2167	64.8053	73.8207	77.9886	78.3801	78.7466	79.0386	79.7164			32.58	61.4663	71.363	78.2107	80.9883	80.9529	81.0993	80.7833	82.9117
32.68	61.7145	65.2654	74.0909	78.2511	79.2061	80.3847	80.2157	80.7844			32.68	59.1945	64.7839	73.7888	77.9588	78.3253	78.6919	79.0027	79.675			32.68	61.4183	71.3328	78.1712	80.9839	80.8948	81.0539	80.7242	82.8406
32.78	61.6961	65.2349	74.0631	78.2146	79.1489	80.3465	80.1824	80.7396			32.78	59.1609	64.7482	73.7337	77.9162	78.2819	78.612	78.9488	79.604			32.78	61.4023	71.2921	78.1285	80.9483	80.8605	80.9784	80.628	82.7728
32.88	61.6652	65.2066	74.0344	78.1705	79.1111	80.284	80.1224	80.7141			32.88	59.1609	64.7482	73.7247	77.8703	78.2488	78.5995	78.9173	79.5559			32.88	61.3704	71.2955	78.0811	80.9355	80.8413	80.9579	80.5628	82.7242
32.98	61.6907	65.172	74.0182	78.1105	79.0705	80.2402	80.0957	80.6547			32.98	59.172	64.7298	73.6735	77.8127	78.2316	78.5323	78.8814	79.5433			32.98	61.3704	71.269	78.0273	80.8812	80.7862	80.8841	80.423	82.6584
33.08	61.6561	65.1678	74.0083	78.0825	79.0439	80.1873	80.0471	80.6045			33.08	59.1387	64.6984	73.6415	77.784	78.1768	78.4753	78.8387	79.5102			33.08	61.3224	71.2299	77.9734	80.8555	80.7237	80.8635	80.3982	82.634
33.18	61.6414	65.1511	73.9751	78.0368	78.9951	80.1541	80.0146	80.5527			33.18	59.0988	64.6771	73.6096	77.7472	78.1756	78.4296	78.7691	79.4802			33.18	61.3286	71.1856	77.9418	80.8098	80.6672	80.8181	80.3485	82.5491
33.28	61.6577	65.126	73.9069	78.0181	78.9591	80.0956	79.9644	80.4963			33.28	59.1099	64.6644	73.63	77.7035	78.1003	78.3897	78.722	79.4092			33.28	61.2134	71.1289	77.858	80.7427	80.6254	80.7426	80.2707	82.49
33.38	61.625	65.1019	73.8997	77.9639	78.925	80.0493	79.9043	80.4554			33.38	59.0897	64.6727	73.6032	77.677	78.0569	78.3327	78.6793	79.3886			33.38	61.1941	71.1146	77.8043	80.6956	80.5734	80.6796	80.2087	82.4553
33.48	61.6451	65.0683	73.8746	77.9343	78.8762	80.0135	79.8696	80.4214			33.48	59.0498	64.6414	73.5609	77.646	78.042	78.2871	78.6478	79.3783			33.48	61.1523	71.0757	77.7567	80.6771	80.5406	80.6436	80.159	82.3562
33.58	61.6376	65.064	73.844	77.9021	78.8245	79.9583	79.8444	80.4036			33.58	59.0763	64.6201	73.4982	77.6173	77.9997	78.2507	78.604	79.3657			33.58	61.1621	71.0419	77.7045	80.6457	80.4782	80.598	80.1185	82.2383
33.68	61.6266	65.0494	73.8118	77.842	78.7914	79.9185	79.8014	80.3588			33.68	59.0943	64.5845	73.5033	77.5908	77.9518	78.2096	78.5501	79.329			33.68	61.1142	71.0401	77.6018	80.6	80.4618	80.5382	80.0845	82.155
33.78	61.5993	65.0316	73.7884	77.8064	78.7333	79.8763	79.7569	80.3226			33.78	59.0874	64.5945	73.4751	77.5368	77.9278	78.1675	78.4905	79.2752			33.78	61.1302	70.9994	77.5463	80.5457	80.429	80.5115	80.0642	82.1045
33.88	61.592	65.0023	73.7517	77.7802	78.7102	79.8235	79.6969	80.2801			33.88	59.0675	64.596	73.4432	77.4908	77.8993	78.0933	78.4378	79.234			33.88	61.1302	70.9726	77.502	80.4958	80.3842	80.4706	79.9835	81.9952
33.98	61.5684	64.9886	73.7176	77.7395	78.6495	79.7967	79.6717	80.2353			33.98	59.0652	64.5774	73.4112	77.462	77.8457	78.05	78.4019	79.2431			33.98	61.0244	70.9549	77.4277	80.4772	80.3366	80.3968	79.9524	81.9466
34.08	61.5902	64.9636	73.6978	77.7149	78.5969	79.761	79.6102	80.1913			34.08	59.0387	64.5419	73.3793	77.4161	77.8307	78.0169	78.348	79.1514			34.08	60.9219	70.932	77.404	80.4101	80.2802	80.2978	79.8747	81.879
34.18	61.5775	64.9499	73.6691	77.6692	78.5436	79.7163	79.572	80.155			34.18	59.0387	64.5233	73.328	77.3585	77.7805	77.9621	78.3165	79.0849			34.18	60.89	70.8929	77.3375	80.3529	80.2608	80.2757	79.8312	81.8077
34.28	61.5775	64.9425	73.652	77.6353	78.4771	79.6952	79.5283	80.1403			34.28	59.0231	64.4919	73.2897	77.3275	77.7348	77.9474	78.2637	79.0689			34.28	60.8674	70.8804	77.2774	80.276	80.2354	80.2348	79.7862	81.7088
34.38	61.5499	64.9237	73.618	77.6065	78.4412	79.6424	79.482	80.1009			34.38	59.0319	64.4919	73.2576	77.2952	77.6914	77.9052	78.2166	79.0276			34.38	60.8994	70.8609	77.2567	80.2559	80.1775	80.1924	79.7272	81.6533
34.48	61.5317	64.8964	73.5919	77.5634	78.3952	79.6124	79.4504	80.0662			34.48	59.0387	64.4733	73.236	77.2643	77.64	77.8858	78.1739	78.9142			34.48	60.874	70.8273	77.2221	80.206	80.1491	80.1531	79.6697	81.544
34.58	61.5537	64.885	73.5623	77.5549	78.3399	79.5636	79.401	80.033			34.58	59.0008	64.4321	73.2219	77.186	77.6081	77.8562	78.1559	78.8672			34.58	60.8002	70.7687	77.1824	80.1788	80.0792	80.0872	79.6059	81.5213
34.68	61.5518	64.8839	73.5237	77.5074	78.2874	79.545	79.384	79.9998			34.68	58.9718	64.435	73.1745	77.1597	77.5509	77.8368	78.0897	78.8053			34.68	60.81	70.7723	77.1429	80.1103	80.0375	80.0117	79.5485	81.4658
34.78	61.5446	64.8556	73.5112	77.4745	78.2385	79.4914	79.3402	79.9441			34.78	58.9385	64.4108	73.1424	77.1458	77.5064	77.7877	78.0582	78.7411			34.78	60.7941	70.7333	77.116	80.0417	79.972	79.9487	79.5065	81.372
34.88	61.5081	64.8534	73.478	77.4236	78.2035	79.4313	79.3078	79.9079			34.88	58.943	64.4164	73.1259	77.1055	77.4629	77.7626	78.0055	78.7044			34.88	60.7457	70.7297	77.0559	80.0061	79.9379	79.8892	79.4429	81.2785
34.98	61.4732	64.8053	73.433	77.399	78.1583	79.4053	79.2721	79.8631			34.98	58.9829	64.3993	73.0823	77.0596	77.415	77.7318	77.9695	78.6323			34.98	60.6883	70.6622	77.0164	79.9675	79.8813	79.8105	79.4445	81.2143
35.08	61.477	64.8158	73.4106	77.3812	78.0957	79.3566	79.2267	79.8352			35.08	58.9496	64.3424	73.0464	77.0135	77.3545	77.6999	77.9156	78.5498			35.08	60.6817	70.6836	76.9957	79.8791	79.8603	79.7492	79.3622	81.1778
35.18	61.4732	64.7728	73.3711	77.3372	78.045	79.2956	79.1992	79.792			35.18	58.9496	64.3069	73.0106	76.9698	77.311	77.6543	77.9066	78.5498			35.18	60.6338	70.6445	76.9609	79.8177	79.8039	79.6737	79.3311	81.0927
35.28	61.477	64.7655	73.3424	77.2822	77.9962	79.2486	79.1441	79.7434			35.28	58.9496	64.2542	72.9826	76.9538	77.2574	77.6224	77.8652	78.4868			35.28	60.6018	70.6216	76.9168	79.772	79.7517	79.6061	79.2689	81.0632
35.38	61.4714	64.7278	73.2967	77.2492	77.9621	79.2112	79.1189	79.6909			35.38	58.9273	64.2313	72.9608	76.91	77.1831	77.5688	77.8213	78.4603			35.38	60.5539	70.5736	76.8692	79.7463	79.7249	79.5323	79.213	80.9972
35.48	61.455	64.7068	73.2671	77.1966	77.9234	79.1755	79.0638	79.6507			35.48	58.9117	64.2143	72.9121	76.8778	77.1603	77.538	77.7831	78.4272			35.48	60.5473	70.5434	76.8155	79.7062	79.7041	79.4271	79.1649	80.9366
35.58	61.4113	64.7215	73.2393	77.1831	77.8717	79.1292	79.0298	79.6291			35.58	58.9162	64.1857	72.8674	76.8412	77.109	77.5117	77.7303	78.3836			35.58	60.5055	70.5203	76.7791	79.6534	79.6326	79.3862	79.1369	80.9139
35.68	61.3947	64.6742	73.2052	77.1382	77.8248	79.0666	78.9811	79.5781			35.68	58.8496	64.1758	72.8161	76.7951	77.0348	77.4662	77.6798	78.3687			35.68	60.4834	70.476	76.7584	79.6291	79.5909	79.3281	79.0747	80.8497
35.78	61.3601	64.667	73.1791	77.0993	77.7907	79.0334	78.9365	79.5503			35.78	58.8271	64.143	72.8188	76.7375	76.9605	77.4183	77.6405	78.3434			35.78	60.4961	70.4796	76.7126	79.5706	79.5582	79.2619	79.0079	80.815
35.88	61.3252	64.6459	73.1701	77.0544	77.7298	79.0008	78.9163	79.5078			35.88	58.8607	64.1359	72.8007	76.7181	76.9171	77.375	77.6125	78.3412			35.88	60.5055	70.4317	76.6762	79.5136	79.5181	79.2446	78.9164	80.7419
35.98	61.3437	64.6324	73.1423	77.0145	77.6985	78.9635	78.8758	79.4576			35.98	58.8271	64.1004	72.7521	76.6744	76.8725	77.3624	77.5698	78.2999			35.98	60.5055	70.3872	76.5972	79.4393	79.4793	79.1707	78.8619	80.6813
36.08	61.3217	64.5999	73.1343	76.9909	77.6607	78.9278	78.8271	79.4075			36.08	58.8049	64.0504	72.7202	76.6572	76.8006	77.3065	77.5283	78.2575			36.08	60.512	70.3695	76.5575	79.3994	79.3871	79.1504	78.8061	80.6362
36.18	61.2963	64.5904	73.1181	76.951	77.6193	78.8717	78.7623	79.3858			36.18	58.7983	64.0149	72.6691	76.6077	76.7435	77.2473	77.4721	78.2117			36.18	60.4735	70.3252	76.5529	79.368	79.3126	79.0655	78.7844	80.5409
36.28	61.2668	64.5895	73.075	76.9019	77.5833	78.8157	78.7015	79.348			36.28	58.7983	63.9793	72.6332	76.5686	76.7115	77.2177	77.4294	78.206			36.28	60.4415	70.2809	76.5022	79.3009	79.3036	78.9744	78.7331	80.5146
36.38	61.2743	64.561	73.0534	76.8774	77.541	78.7946	78.669	79.2908			36.38	58.8049	63.9323	72.605	76.5157	76.6465	77.1845	77.3766	78.1796			36.38	60.3936	70.2364	76.4674	79.2295	79.2383	78.9068	78.6508	80.4471
36.48	61.2359	64.5412	73.0095	76.857	77.4847	78.7434	78.6099	79.2491			36.48	58.8006	63.9252	72.541	76.4697	76.6178	77.1298	77.3318	78.1407			36.48	60.3837	70.2099	76.4263	79.2138	79.1758	78.8611	78.5995	80.3811
36.58	61.2177	64.5181	72.9916	76.8283	77.4608	78.7028	78.5742	79.1997			36.58	58.7715	63.8767	72.509	76.4443	76.6019	77.0843	77.2677	78.1143			36.58	60.3616	70.162	76.3915	79.1609	79.1043	78.8438	78.5389	80.3585
36.68	61.2011	64.5087	72.979	76.7919	77.4036	78.6581	78.5231	79.158			36.68	58.7493	63.8753	72.4872	76.3984	76.5665	77.0272	77.2138	78.0798			36.68	60.3137	70.1424	76.3487	79.1153	79.0299	78.7935	78.4892	80.2698
36.78	61.203	64.4952	72.9269	76.7588	77.3888	78.6159	78.4745	79.1163			36.78	58.7271	63.8583	72.4412	76.3674	76.5459	76.9668	77.1711	78.0341			36.78	60.2817	70.0945	76.3076	79.0681	78.9554	78.7432	78.4146	80.19
36.88	61.1684	64.4626	72.9027	76.7419	77.34	78.5826	78.4299	79.0745			36.88	58.7539	63.8226	72.3939	76.3237	76.4922	76.9303	77.1295	77.9767			36.88	60.2333	70.0716	76.2491	79.0111	78.8929	78.6678	78.3556	80.1067
36.98	61.1882	64.4543	72.8722	76.7173	77.3078	78.5355	78.391	79.0429			36.98	58.7271	63.7912	72.3619	76.2661	76.4522	76.8675	77.0735	77.916			36.98	60.2013	70.0325	76.1857	78.9753	78.814	78.6237	78.3029	80.0599
37.08	61.1536	64.426	72.857	76.6673	77.2498	78.4966	78.3488	78.9919			37.08	58.7271	63.7799	72.3362	76.2467	76.4203	76.8128	77.0376	77.9			37.08	60.2272	69.9882	76.1653	78.921	78.7574	78.5656	78.2096	79.9992
37.18	61.1555	64.428	72.8318	76.6437	77.1908	78.4486	78.2929	78.9417			37.18	58.6938	63.7586	72.2915	76.203	76.3952	76.7706	77.0005	77.8736			37.18	60.2333	69.9757	76.1304	78.8783	78.7098	78.539	78.1351	79.9245
37.28	61.1445	64.4008	72.804	76.6157	77.1604	78.4023	78.2346	78.8846			37.28	58.6938	63.7086	72.2596	76.1454	76.3781	76.708	76.9387	77.8278			37.28	60.1534	69.9614	76.0877	78.8254	78.6547	78.498	78.0528	79.8828
37.38	61.17	64.3966	72.8031	76.5784	77.1207	78.3545	78.1729	78.846			37.38	58.7114	63.6846	72.262	76.0879	76.3518	76.66	76.8994	77.7533			37.38	60.1534	69.9385	76.0276	78.7469	78.5461	78.4823	78.0186	79.8463
37.48	61.1317	64.3788	72.778	76.5522	77.071	78.3203	78.1381	78.7974			37.48	58.716	63.6859	72.2147	76.0695	76.2958	76.6168	76.8208	77.7131			37.48	60.1054	69.9172	75.9881	78.7255	78.5044	78.4839	77.9643	79.7613
37.58	61.1153	64.3557	72.7537	76.5115	77.0296	78.2708	78.0773	78.7626			37.58	58.716	63.6589	72.1929	76.0477	76.2775	76.586	76.7949	77.6593			37.58	60.0575	69.8729	75.9375	78.6513	78.445	78.4557	77.9068	79.7248
37.68	61.1335	64.3232	72.7304	76.4691	77.0101	78.2269	78.0328	78.7162			37.68	58.6827	63.6376	72.1508	75.9937	76.2353	76.5562	76.7568	77.6352			37.68	60.0255	69.8479	75.8885	78.6285	78.3794	78.4085	77.874	79.6868
37.78	61.1116	64.3075	72.7161	76.4269	76.9659	78.1839	77.9922	78.6807			37.78	58.7092	63.6233	72.1123	75.9579	76.2067	76.5027	76.7006	77.5757			37.78	60.0255	69.7929	75.8457	78.5828	78.3526	78.3457	77.8166	79.6139
37.88	61.0898	64.3034	72.6945	76.4031	76.9419	78.1684	77.9435	78.6359			37.88	58.667	63.6018	72.0804	75.9442	76.1702	76.4662	76.6636	77.5493			37.88	59.9771	69.7752	75.8014	78.5256	78.3006	78.3063	77.7778	79.5686
37.98	61.0807	64.2834	72.6541	76.3532	76.8839	78.1221	77.8852	78.5865			37.98	58.6604	63.5778	72.0484	75.8809	76.1439	76.4309	76.6075	77.4897			37.98	60.0316	69.77	75.7666	78.5015	78.2693	78.2465	77.739	79.5044
38.08	61.0641	64.2646	72.6371	76.3167	76.8609	78.0774	77.8495	78.5502			38.08	58.6268	63.5592	72.0189	75.8407	76.1154	76.383	76.576	77.4209			38.08	60.0189	69.7132	75.7633	78.4642	78.2826	78.1884	77.7188	79.4698
38.18	61.044	64.2394	72.6165	76.293	76.8259	78.0256	77.8163	78.517			38.18	58.6268	63.545	71.9998	75.8016	76.0582	76.318	76.5345	77.3637			38.18	59.9931	69.6422	75.7396	78.4114	78.2261	78.1381	77.6846	79.4004
38.28	61.0459	64.2069	72.6111	76.2625	76.7872	77.9832	77.7774	78.4792			38.28	58.6536	63.5094	71.9716	75.7717	76.0297	76.2804	76.4895	77.3178			38.28	59.9931	69.5979	75.7192	78.3971	78.1889	78.1208	77.6458	79.3518
38.38	61.0131	64.1996	72.5922	76.2312	76.7623	77.95	77.7328	78.4336			38.38	58.6337	63.4879	71.9395	75.7142	75.9977	76.2484	76.4334	77.264			38.38	59.9837	69.5924	75.6795	78.3428	78.1323	78.102	77.5836	79.2927
38.48	61.0113	64.1869	72.5716	76.2075	76.7106	77.9021	77.6939	78.4004			38.48	58.6092	63.4666	71.9012	75.6878	75.9726	76.1949	76.3975	77.2147			38.48	59.9452	69.5534	75.6272	78.3114	78.0996	78.0596	77.5573	79.232
38.58	60.971	64.1619	72.5268	76.1761	76.6702	77.8728	77.642	78.3402			38.58	58.5958	63.4553	71.8756	75.6453	75.9383	76.1492	76.3514	77.154			38.58	59.9452	69.5304	75.5847	78.2659	78.0519	78.0188	77.5215	79.1869
38.68	60.9453	64.122	72.5177	76.1346	76.6351	77.8241	77.5804	78.3084			38.68	58.5602	63.4381	71.8244	75.613	75.8983	76.0923	76.3021	77.0944			38.68	59.8972	69.4914	75.545	78.2188	78.0178	77.9417	77.478	79.1314
38.78	60.9472	64.1063	72.4908	76.0923	76.6139	77.7949	77.5366	78.2745			38.78	58.5647	63.4026	71.7924	75.5705	75.8617	76.0466	76.2594	76.989			38.78	59.8652	69.4471	75.4818	78.1444	77.9835	77.9196	77.4563	79.0965
38.88	60.9126	64.0697	72.4774	76.0779	76.5687	77.7323	77.4994	78.2328			38.88	58.5533	63.3811	71.7541	75.5129	75.815	76.0158	76.2167	76.8996			38.88	59.8173	69.4026	75.4661	78.1173	77.9285	77.8836	77.3973	79.0445
38.98	60.8777	64.0519	72.4612	76.028	76.5402	77.6933	77.4596	78.1818			38.98	58.4935	63.3811	71.722	75.4647	75.7841	75.9724	76.1864	76.8938			38.98	59.8554	69.3726	75.4027	78.0874	77.9062	77.8192	77.3537	78.9576
39.08	60.8742	64.0299	72.4235	76.0042	76.5061	77.6511	77.415	78.1332			39.08	58.4445	63.3455	71.6874	75.421	75.7521	75.9269	76.1437	76.817			39.08	59.7468	69.3015	75.3917	77.9945	77.8837	77.7751	77.3398	78.9021
39.18	60.8614	63.9879	72.4082	75.9796	76.4693	77.6211	77.3616	78.1038			39.18	58.4377	63.3313	71.6581	75.3911	75.6984	75.9006	76.0909	76.7528			39.18	59.8234	69.2518	75.3583	77.9717	77.8704	77.7248	77.2808	78.8743
39.28	60.8541	63.9628	72.3787	75.95	76.4444	77.578	77.2991	78.0467			39.28	58.4044	63.31	71.5877	75.3693	75.6906	75.8585	76.0258	76.6704			39.28	59.8107	69.2341	75.3156	77.9403	77.802	77.6462	77.2372	78.8501
39.38	60.8067	63.9418	72.3427	75.9026	76.4066	77.535	77.2586	78.0196			39.38	58.4044	63.2743	71.5557	75.3232	75.6356	75.8129	75.9617	76.5958			39.38	59.8107	69.1898	75.2919	77.8833	77.7825	77.5723	77.203	78.7999
39.48	60.7938	63.9073	72.2961	75.867	76.3568	77.4854	77.2059	77.9632			39.48	58.3822	63.2174	71.5045	75.2922	75.59	75.7559	75.9225	76.5213			39.48	59.8173	69.1578	75.2524	77.8118	77.7498	77.5126	77.1301	78.7148
39.58	60.7627	63.8884	72.2818	75.8391	76.3172	77.4407	77.1532	77.9223			39.58	58.3488	63.1789	71.475	75.2645	75.5238	75.741	75.8697	76.4549			39.58	59.8013	69.1667	75.2129	77.7718	77.7126	77.4528	77.0788	78.7061
39.68	60.7153	63.8496	72.2592	75.7865	76.2712	77.4017	77.1151	77.8652			39.68	58.3488	63.1561	71.4276	75.2231	75.4644	75.6988	75.8326	76.4046			39.68	59.7693	69.1276	75.1732	77.7347	77.6591	77.3979	77.0354	78.6193
39.78	60.7043	63.8129	72.2198	75.7519	76.2342	77.3652	77.0576	77.8451			39.78	58.293	63.1603	71.3765	75.1772	75.4186	75.6419	75.8046	76.3289			39.78	59.7209	69.0745	75.1574	77.6762	77.6204	77.3365	76.9623	78.5706
39.88	60.7099	63.7899	72.2036	75.7197	76.1992	77.3214	77.0292	77.7972			39.88	58.293	63.0991	71.342	75.1335	75.373	75.5826	75.7764	76.2498			39.88	59.8074	69.0302	75.1465	77.619	77.601	77.28	76.9205	78.5031
39.98	60.6641	63.7752	72.1919	75.6985	76.1651	77.2881	76.9992	77.7471			39.98	58.2776	63.075	71.3125	75.0991	75.333	75.5642	75.7293	76.1662			39.98	59.7853	69.0266	75.1101	77.5691	77.5265	77.2611	76.877	78.4664
40.08	60.6367	63.7564	72.1587	75.663	76.1034	77.2328	76.9433	77.7084			40.08	58.2642	63.0337	71.246	75.0726	75.2793	75.513	75.6609	76.1627			40.08	59.7369	68.9768	75.0706	77.5149	77.4299	77.1983	76.8799	78.3953
40.18	60.6514	63.7102	72.1346	75.6028	76.0657	77.1923	76.9157	77.669			40.18	58.2865	62.9967	71.2101	75.03	75.2394	75.4594	75.6327	76.1684			40.18	59.705	68.9591	75.0309	77.4621	77.3882	77.1229	76.807	78.3449
40.28	60.6439	63.705	72.1247	75.5884	76.0362	77.1516	76.863	77.6281			40.28	58.2597	62.9753	71.1973	74.9932	75.196	75.3967	75.5744	76.181			40.28	59.7308	68.9591	74.9677	77.405	77.3183	77.1007	76.7294	78.2634
40.38	60.5965	63.6621	72.0915	75.5375	75.9763	77.1208	76.7965	77.5579			40.38	58.2375	62.9398	71.1462	74.9667	75.1502	75.3398	75.5069	76.1662			40.38	59.7275	68.8883	74.9944	77.4021	77.275	77.041	76.6827	78.2078
40.48	60.6131	63.6473	72.069	75.4826	75.9302	77.0892	76.7584	77.537			40.48	58.2107	62.9212	71.1295	74.9093	75.1182	75.2804	75.4789	76.1546			40.48	59.6508	68.8706	74.9598	77.3336	77.1992	76.9782	76.6237	78.1316
40.58	60.5782	63.6118	72.0403	75.4131	75.9118	77.0412	76.7074	77.4836			40.58	58.1708	62.8871	71.1014	74.885	75.0932	75.2199	75.4339	76.0974			40.58	59.609	68.8474	74.9122	77.2936	77.1618	76.8996	76.5787	78.0603
40.68	60.56	63.5949	72.0098	75.3716	75.8611	76.9901	76.6491	77.4311			40.68	58.1218	62.8472	71.0502	74.8288	75.0223	75.1766	75.3756	76.0629			40.68	59.6795	68.8083	74.8727	77.2408	77.0875	76.8163	76.532	78.0152
40.78	60.5637	63.572	71.9847	75.336	75.8214	76.9356	76.6117	77.3717			40.78	58.1084	62.8186	71.008	74.8092	74.9903	75.1436	75.324	76.0057			40.78	59.641	68.7781	74.8332	77.1693	77.0607	76.7581	76.4575	77.951
40.88	60.5528	63.53	71.9515	75.2886	75.781	76.9226	76.5858	77.3146			40.88	58.0973	62.7972	70.967	74.7655	74.9447	75.0546	75.2487	75.9598			40.88	59.609	68.7109	74.8411	77.1509	77.0056	76.7078	76.4094	77.9214
40.98	60.5418	63.5038	71.9264	75.2454	75.7413	76.8723	76.5315	77.2782			40.98	58.0774	62.7788	70.962	74.7368	74.8875	74.9977	75.1847	75.9507			40.98	59.6345	68.6841	74.8095	77.0951	76.9311	76.6559	76.3489	77.8641
41.08	60.5235	63.4901	71.8913	75.2183	75.7044	76.8504	76.4861	77.2273			41.08	58.0817	62.7475	70.9158	74.6908	74.8419	74.952	75.1308	75.9347			41.08	59.641	68.6398	74.7936	77.0408	76.8835	76.5931	76.3131	77.833
41.18	60.5252	63.4598	71.8716	75.1895	75.6786	76.8089	76.4577	77.1817			41.18	58.0862	62.7261	70.8928	74.6597	74.8019	74.9008	75.0746	75.9083			41.18	59.609	68.5956	74.7541	77.0052	76.8345	76.5334	76.2557	77.7826
41.28	60.4924	63.4378	71.8465	75.1548	75.6491	76.7756	76.4042	77.1099			41.28	58.0928	62.709	70.8391	74.6275	74.7528	74.8551	75.0017	75.8912			41.28	59.5992	68.5654	74.7146	76.9482	76.7808	76.4517	76.2215	77.7252
41.38	60.4761	63.4335	71.8143	75.0862	75.5948	76.7375	76.3726	77.0728			41.38	58.0284	62.6549	70.8224	74.5919	74.6991	74.8186	74.9287	75.8877			41.38	59.5771	68.5245	74.6702	76.8981	76.7229	76.4014	76.1469	77.6595
41.48	60.4541	63.42	71.7774	75.0295	75.556	76.6968	76.3159	77.0156			41.48	58.0261	62.6534	70.7942	74.5471	74.6535	74.7925	74.8445	75.8648			41.48	59.5771	68.4979	74.6354	76.8411	76.653	76.3338	76.0879	77.5953
41.58	60.4359	63.3854	71.772	75.0024	75.5118	76.6627	76.2583	76.9647			41.58	57.9859	62.6051	70.7854	74.5297	74.5998	74.7525	74.7995	75.8488			41.58	59.5291	68.4748	74.5959	76.7797	76.6008	76.2898	76.0662	77.5484
41.68	60.4359	63.3749	71.7442	74.9998	75.4823	76.6229	76.2267	76.9153			41.68	57.9483	62.5951	70.7456	74.4815	74.5507	74.7069	74.7434	75.8052			41.68	59.4807	68.4536	74.5722	76.7126	76.5844	76.2316	76.0071	77.5153
41.78	60.4158	63.3549	71.719	74.9422	75.44	76.5978	76.1886	76.8813			41.78	57.9748	62.5623	70.6766	74.4551	74.5187	74.6613	74.7288	75.7284			41.78	59.5353	68.4359	74.5088	76.6982	76.5339	76.1373	75.9946	77.4475
41.88	60.3828	63.3309	71.6877	74.905	75.4132	76.5531	76.148	76.8288			41.88	57.9216	62.5267	70.6216	74.378	74.4844	74.57	74.7041	75.6814			41.88	59.5451	68.3914	74.4694	76.6198	76.4773	76.0556	75.9372	77.4355
41.98	60.3573	63.3131	71.6653	74.8762	75.3598	76.5076	76.1099	76.7871			41.98	57.8971	62.5081	70.6087	74.3458	74.4285	74.5416	74.6592	75.6252			41.98	59.4967	68.3471	74.425	76.6026	76.4356	76.0429	75.8952	77.3729
42.08	60.3409	63.2879	71.6366	74.8415	75.3341	76.4776	76.0742	76.7392			42.08	57.9105	62.4912	70.5767	74.3194	74.393	74.5267	74.603	75.5817			42.08	59.5033	68.3346	74.3902	76.5484	76.376	76.0069	75.8519	77.3087
42.18	60.2897	63.2586	71.6086	74.7771	75.2889	76.437	76.0225	76.6812			42.18	57.866	62.4555	70.5767	74.2769	74.3371	74.4902	74.5783	75.5152			42.18	59.5385	68.294	74.3902	76.5084	76.3283	75.9331	75.8254	77.2567
42.28	60.3115	63.2334	71.562	74.7398	75.2649	76.411	75.9883	76.6311			42.28	57.8079	62.4456	70.5256	74.2654	74.2937	74.4447	74.5267	75.4693			42.28	59.4967	68.2495	74.3632	76.4555	76.2689	75.889	75.7694	77.222
42.38	60.2678	63.2293	71.5396	74.7314	75.2409	76.3533	75.9527	76.5778			42.38	57.7968	62.417	70.523	74.2504	74.2572	74.4161	74.4716	75.4224			42.38	59.5291	68.2052	74.327	76.3985	76.2658	75.8152	75.7119	77.1352
42.48	60.2533	63.1863	71.5037	74.6967	75.2068	76.3143	75.9081	76.54			42.48	57.8036	62.3915	70.4935	74.217	74.1932	74.3705	74.42	75.3892			42.48	59.5672	68.2034	74.2873	76.3485	76.2093	75.7884	75.6779	77.1092
42.58	60.2476	63.179	71.4678	74.6822	75.17	76.2714	75.866	76.4882			42.58	57.7547	62.3942	70.4449	74.1596	74.1452	74.3249	74.3953	75.3526			42.58	59.5451	68.1875	74.2478	76.2772	76.135	75.7019	75.6608	77.0692
42.68	60.2165	63.1422	71.4436	74.6458	75.1377	76.2323	75.8238	76.4704			42.68	57.7145	62.3773	70.4105	74.1297	74.1304	74.285	74.365	75.278			42.68	59.4967	68.1432	74.2083	76.22	76.0932	75.6657	75.6344	77.019
42.78	60.2348	63.1265	71.422	74.634	75.0779	76.2007	75.7889	76.4047			42.78	57.7324	62.353	70.3784	74.0871	74.0744	74.2485	74.3223	75.2414			42.78	59.4746	68.0987	74.1449	76.1701	76.0605	75.5872	75.5908	76.9703
42.88	60.1948	63.1182	71.388	74.5908	75.0428	76.1414	75.7508	76.3654			42.88	57.688	62.3231	70.3438	74.0411	74.023	74.1938	74.2943	75.2			42.88	59.4807	68.0544	74.1055	76.1414	76.0351	75.5432	75.5566	76.927
42.98	60.1747	63.0773	71.3681	74.5552	75.0189	76.1153	75.7289	76.3237			42.98	57.6521	62.2847	70.3233	73.9952	73.9796	74.1367	74.2661	75.1611			42.98	59.4488	68.0279	74.0818	76.0915	75.9785	75.4458	75.5302	76.8834
43.08	60.1527	63.0637	71.3404	74.5027	74.9691	76.0601	75.6715	76.2758			43.08	57.6077	62.2817	70.2951	73.9629	73.9226	74.1163	74.2516	75.1256			43.08	59.4746	67.9834	74.0611	76.0387	75.9414	75.3828	75.4898	76.8368
43.18	60.1747	63.0396	71.2972	74.4527	74.9165	76.0122	75.6455	76.2179			43.18	57.6077	62.2376	70.2478	73.9352	73.8882	74.0798	74.21	75.0604			43.18	59.4074	67.9391	74.0263	75.9972	75.8669	75.3168	75.4169	76.8001
43.28	60.1455	63.0019	71.2722	74.4095	74.8769	75.9578	75.5969	76.177			43.28	57.6145	62.2134	70.2273	73.9089	73.862	74.0365	74.182	74.9995			43.28	59.3947	67.8948	73.9678	75.9702	75.8477	75.2414	75.3548	76.7359
43.38	60.1436	63.0154	71.2435	74.3646	74.8299	75.9172	75.5563	76.1198			43.38	57.5988	62.1607	70.1992	73.8628	73.7935	73.9829	74.1538	74.9858			43.38	59.4008	67.8503	73.9394	75.913	75.8149	75.2209	75.2958	76.6735
43.48	60.1034	62.9914	71.2075	74.3308	74.7959	75.8823	75.5158	76.0735			43.48	57.5476	62.1166	70.18	73.8341	73.7626	73.9258	74.109	74.9399			43.48	59.3529	67.806	73.8888	75.8417	75.7554	75.147	75.2383	76.6197
43.58	60.0503	62.9525	71.1385	74.3011	74.7581	75.8328	75.4753	76.0279			43.58	57.5744	62.0995	70.1289	73.7881	73.7318	73.8631	74.0696	74.9113			43.58	59.3209	67.7831	73.876	75.7875	75.7181	75.0999	75.2119	76.5797
43.68	60.0339	62.9411	71.1133	74.274	74.7139	75.7905	75.4306	75.9886			43.68	57.5809	62.0681	70.0866	73.7479	73.6793	73.8062	74.0113	74.8632			43.68	59.3975	67.7352	73.8001	75.7346	75.6735	75.0732	75.1497	76.5502
43.78	60.0704	62.9275	71.0774	74.2207	74.677	75.7427	75.3877	75.9337			43.78	57.5655	62.0284	70.0495	73.7156	73.6347	73.7469	73.9483	74.862			43.78	59.3688	67.6906	73.7764	75.689	75.599	74.9977	75.1063	76.4844
43.88	60.0578	62.8961	71.0568	74.1716	74.6419	75.7004	75.3617	75.8788			43.88	57.5433	61.9926	70.0201	73.6616	73.6027	73.7001	73.8787	74.823			43.88	59.3688	67.6607	73.7416	75.6418	75.5365	74.938	75.0473	76.4184
43.98	60.0066	62.8876	71.0308	74.1148	74.6217	75.6573	75.3075	75.8179			43.98	57.541	61.9571	69.9843	73.6156	73.5571	73.675	73.8227	74.7623			43.98	59.3369	67.6411	73.7021	75.6062	75.48	74.8798	74.9898	76.3802
44.08	60.0066	62.8593	70.994	74.114	74.5674	75.6168	75.2645	75.7908			44.08	57.4986	61.9358	69.9561	73.5754	73.5091	73.643	73.7665	74.7337			44.08	59.2889	67.6287	73.6387	75.5748	75.4382	74.8171	74.9508	76.3247
44.18	60.0286	62.8258	70.967	74.0607	74.5378	75.5721	75.224	75.7391			44.18	57.5188	61.9215	69.9241	73.5156	73.4657	73.6067	73.7215	74.6878			44.18	59.2889	67.6021	73.6229	75.5419	75.3906	74.7966	74.9089	76.2796
44.28	59.9937	62.8038	70.9303	74.0335	74.5	75.5046	75.1818	75.7004			44.28	57.492	61.8618	69.887	73.4834	73.4064	73.5529	73.6823	74.6477			44.28	59.2405	67.5576	73.5834	75.4706	75.294	74.7463	74.8498	76.2291
44.38	59.9827	62.7912	70.8971	73.9844	74.465	75.4592	75.1323	75.6542			44.38	57.492	61.8218	69.8345	73.4512	73.3765	73.5245	73.6373	74.5561			44.38	59.2344	67.5133	73.5723	75.4163	75.2449	74.6724	74.791	76.1718
44.48	59.9884	62.7389	70.8603	73.9428	74.4227	75.4088	75.0968	75.6202			44.48	57.492	61.7863	69.8026	73.4144	73.3252	73.4811	73.5924	74.4987			44.48	59.2405	67.4901	73.5121	75.3734	75.1675	74.6362	74.7335	76.0852
44.58	59.9884	62.7367	70.8396	73.9183	74.3849	75.3633	75.0489	75.5722			44.58	57.4698	61.7677	69.7859	73.389	73.2863	73.4492	73.5474	74.4701			44.58	59.2729	67.469	73.4727	75.325	75.1302	74.5765	74.6713	76.0156
44.68	59.9481	62.7115	70.793	73.9157	74.325	75.3162	75.0238	75.5237			44.68	57.4541	61.7506	69.7282	73.3247	73.2372	73.4242	73.5082	74.4334			44.68	59.2889	67.4531	73.452	75.2707	75.0454	74.5418	74.617	75.967
44.78	59.9425	62.698	70.7678	73.8895	74.2871	75.2692	74.9849	75.495			44.78	57.4254	61.715	69.6938	73.2764	73.2168	73.3842	73.452	74.3692			44.78	59.2405	67.4016	73.4174	75.2093	74.9888	74.534	74.5968	75.9114
44.88	59.9372	62.6707	70.7337	73.8565	74.2412	75.2074	74.95	75.4502			44.88	57.4074	61.6793	69.6617	73.2304	73.1779	73.366	73.4184	74.3327			44.88	59.311	67.3857	73.4014	75.1636	74.9739	74.4869	74.5393	75.8854
44.98	59.928	62.6287	70.6898	73.8337	74.1942	75.1571	74.9127	75.4178			44.98	57.3695	61.6438	69.6298	73.1878	73.1561	73.3387	73.3735	74.2948			44.98	59.2889	67.3448	73.3967	75.128	74.8966	74.4523	74.4508	75.8454
45.08	59.9117	62.6257	70.6511	73.8015	74.1701	75.1416	74.8689	75.3823			45.08	57.3695	61.6253	69.5889	73.1304	73.1117	73.2816	73.3173	74.2444			45.08	59.2405	67.3005	73.3777	75.0823	74.8876	74.4004	74.3763	75.7812
45.18	59.875	62.5921	70.6261	73.7675	74.1195	75.1092	74.8389	75.3452			45.18	57.3473	61.5967	69.5402	73.081	73.0659	73.2359	73.2779	74.2065			45.18	59.2405	67.2951	73.3382	75.0494	74.8549	74.3533	74.3327	75.7223
45.28	59.8696	62.566	70.5776	73.7506	74.0983	75.0645	74.7798	75.3066			45.28	57.3473	61.5798	69.4955	73.0521	73.0179	73.1973	73.2163	74.1607			45.28	59.2024	67.3039	73.2987	74.9779	74.8132	74.3328	74.2627	75.6337
45.38	59.8422	62.5429	70.5453	73.7058	74.0642	75.0182	74.7441	75.2564			45.38	57.3408	61.5342	69.4788	73.0119	72.9951	73.1333	73.1769	74.1115			45.38	59.1991	67.2438	73.259	74.9423	74.7655	74.259	74.182	75.5644
45.48	59.8275	62.4926	70.5166	73.6998	74.0273	74.9889	74.7052	75.2062			45.48	57.2872	61.5227	69.4314	72.9797	72.9541	73.1163	73.1321	74.046			45.48	59.1606	67.2117	73.2084	74.9067	74.7179	74.1805	74.1556	75.5035
45.58	59.8055	62.4842	70.4699	73.6533	74.0043	74.9305	74.6728	75.1652			45.58	57.2585	61.5127	69.3995	72.92	72.8981	73.0707	73.0927	74.006			45.58	59.1606	67.1974	73.1721	74.818	74.6613	74.1302	74.0965	75.4602
45.68	59.8203	62.458	70.46	73.6338	73.9702	74.8858	74.612	75.129			45.68	57.2249	61.4801	69.3777	72.8739	72.8763	73.0137	73.059	73.9429			45.68	59.1127	67.1904	73.1325	74.7566	74.6242	74.0767	74.0997	75.3977
45.78	59.802	62.4223	70.434	73.6177	73.9342	74.8371	74.5812	75.0904			45.78	57.2249	61.4473	69.3586	72.8452	72.8433	72.9703	73.0028	73.9143			45.78	59.1286	67.1497	73.093	74.7024	74.5824	73.9996	74.0655	75.33
45.88	59.7489	62.4035	70.3945	73.5855	73.9085	74.7908	74.5455	75.0402			45.88	57.2428	61.4203	69.3227	72.7876	72.8238	72.9111	72.9748	73.8662			45.88	59.0807	67.1675	73.0535	74.6667	74.5348	73.9369	73.988	75.3093
45.98	59.7508	62.3773	70.3578	73.5516	73.8651	74.7428	74.5098	75.0015			45.98	57.2072	61.4088	69.2907	72.751	72.7941	72.8826	72.9389	73.7974			45.98	59.0807	67.1443	73.0138	74.6468	74.4605	73.8944	73.9615	75.2433
46.08	59.7728	62.3616	70.3173	73.5372	73.8163	74.7015	74.4791	74.959			46.08	57.1471	61.3689	69.2586	72.7015	72.7827	72.8393	72.885	73.7367			46.08	59.0487	67.1229	72.9901	74.5925	74.4009	73.8347	73.9212	75.1738
46.18	59.738	62.3249	70.3075	73.5025	73.7896	74.6527	74.4313	74.932			46.18	57.1693	61.3732	69.2421	72.6555	72.7381	72.7948	72.8569	73.6851			46.18	59.0389	67.093	72.9506	74.5712	74.3266	73.8142	73.848	75.1511
46.28	59.7052	62.3092	70.2474	73.461	73.7648	74.595	74.3753	74.8788			46.28	57.1249	61.3404	69.1948	72.5922	72.6947	72.74	72.8176	73.645			46.28	59.0807	67.0787	72.9348	74.5383	74.3012	73.7325	73.8202	75.1131
46.38	59.7052	62.2777	70.2312	73.4364	73.691	74.5731	74.3299	74.8332			46.38	57.1249	61.3135	69.1627	72.5773	72.6491	72.6773	72.7727	73.6267			46.38	59.0487	67.0255	72.9142	74.5068	74.2595	73.6776	73.7472	75.0836
46.48	59.6814	62.2568	70.1873	73.3932	73.6726	74.5147	74.2886	74.7815			46.48	57.0915	61.2878	69.1461	72.552	72.592	72.6465	72.7412	73.5912			46.48	59.0487	67.0078	72.8524	74.4855	74.2252	73.6335	73.685	75.0263
46.58	59.6687	62.2306	70.1486	73.3552	73.6265	74.4774	74.2261	74.7405			46.58	57.0915	61.2522	69.0988	72.5059	72.5554	72.5747	72.6885	73.5419			46.58	59.0008	67.0112	72.8635	74.4283	74.1702	73.5721	73.6585	74.9778
46.68	59.6339	62.2233	70.1236	73.3272	73.5961	74.4391	74.1783	74.6849			46.68	57.0314	61.2422	69.0667	72.4911	72.5177	72.5427	72.6435	73.5133			46.68	59.0008	66.9722	72.8319	74.3784	74.1107	73.5597	73.5888	74.9498
46.78	59.6175	62.1908	70.1002	73.2967	73.5648	74.4082	74.1337	74.6255			46.78	57.0514	61.2094	69.045	72.4289	72.4686	72.4891	72.5874	73.4307			46.78	59.0487	66.9456	72.7925	74.3356	74.0734	73.4999	73.522	74.8823
46.88	59.5864	62.1782	70.0742	73.2704	73.5206	74.3547	74.0729	74.5806			46.88	57.0024	61.188	69.0629	72.3656	72.432	72.4436	72.5627	73.3952			46.88	58.9524	66.919	72.7528	74.2971	74.0109	73.4418	73.5049	74.8181
46.98	59.5682	62.1153	70.0383	73.2298	73.5086	74.3246	74.047	74.5421			46.98	57.0024	61.141	69.0501	72.33	72.4002	72.4036	72.5088	73.355			46.98	58.9204	66.8925	72.6926	74.2642	73.9768	73.415	73.4442	74.7486
47.08	59.5682	62.0944	69.997	73.1748	73.481	74.2824	73.9935	74.5073			47.08	56.9691	61.1354	69.0323	72.2898	72.3579	72.3581	72.4526	73.2669			47.08	58.9462	66.8747	72.6627	74.2241	73.9351	73.3552	73.4412	74.7346
47.18	59.55	62.0765	69.9889	73.1282	73.4385	74.2426	73.9376	74.4856			47.18	56.9691	61.117	69.0028	72.2473	72.3179	72.3261	72.4099	73.2267			47.18	58.9204	66.8302	72.6294	74.1927	73.8874	73.305	73.3899	74.6703
47.28	59.5151	62.0545	69.9513	73.0858	73.409	74.1817	73.884	74.4548			47.28	56.9691	61.0812	68.9707	72.2323	72.2893	72.301	72.355	73.1981			47.28	58.8725	66.8037	72.5993	74.1571	73.8829	73.272	73.3325	74.6444
47.38	59.5207	62.0158	69.9198	73.0435	73.3602	74.1566	73.8483	74.4076			47.38	56.9289	61.0599	68.9515	72.1898	72.2619	72.2691	72.3123	73.1409			47.38	58.8725	66.786	72.5472	74.1001	73.8278	73.1903	73.2842	74.575
47.48	59.5226	61.9927	69.884	73.0096	73.3087	74.1029	73.8135	74.3776			47.48	56.909	61.0457	68.9196	72.153	72.1923	72.2441	72.264	73.0835			47.48	58.8147	66.7594	72.5233	74.0429	73.7863	73.1478	73.2082	74.5264
47.58	59.4695	61.9581	69.875	72.98	73.2828	74.0567	73.7665	74.3282			47.58	56.9178	61.0413	68.8813	72.1059	72.1809	72.2133	72.1978	73.0239			47.58	58.7605	66.7735	72.4839	74.0043	73.7609	73.0881	73.2174	74.4708
47.68	59.4476	61.9319	69.839	72.9359	73.2395	74.0331	73.7309	74.2887			47.68	56.8756	61.0143	68.8837	72.0667	72.1489	72.1813	72.1516	72.9747			47.68	58.8019	66.7328	72.4444	73.9829	73.7013	73.044	73.1647	74.4204
47.78	59.4494	61.8953	69.8274	72.9038	73.2146	73.9925	73.6935	74.2779			47.78	56.8845	60.9744	68.8364	72.023	72.1375	72.1414	72.09	72.9425			47.78	58.7347	66.7149	72.4332	73.9458	73.6419	73.0094	73.104	74.3962
47.88	59.4092	61.8513	69.7853	72.8572	73.1492	73.9616	73.6595	74.2285			47.88	56.8913	60.9702	68.7853	71.9943	72.0838	72.1266	72.0541	72.8978			47.88	58.738	66.6883	72.3968	73.9144	73.6017	72.9891	73.0404	74.332
47.98	59.4256	61.824	69.7458	72.8182	73.1243	73.8999	73.6214	74.1991			47.98	56.8355	60.9389	68.7532	71.9253	72.0781	72.0844	72.0091	72.883			47.98	58.7122	66.6706	72.3763	73.8815	73.5599	72.9434	73.0201	74.2815
48.08	59.4038	61.803	69.726	72.8047	73.0948	73.8641	73.5719	74.1473			48.08	56.8534	60.9033	68.7315	71.8793	72.038	72.0674	71.953	72.8085			48.08	58.7122	66.6617	72.3415	73.8287	73.5079	72.8885	72.9627	74.214
48.18	59.4038	61.759	69.7044	72.7826	73.0617	73.8382	73.5436	74.108			48.18	56.8577	60.8705	68.7021	71.8782	71.9809	72.057	71.9248	72.7683			48.18	58.6642	66.6175	72.302	73.7717	73.4483	72.8633	72.9084	74.1931
48.28	59.4038	61.759	69.6443	72.7268	73.0276	73.7951	73.4983	74.0887			48.28	56.8577	60.8548	68.6893	71.839	71.9661	72.0183	71.8609	72.7511			48.28	58.6323	66.612	72.2228	73.7688	73.4111	72.7895	72.8462	74.1445
48.38	59.3489	61.7307	69.6264	72.6895	73.0027	73.774	73.452	74.0316			48.38	56.8577	60.8249	68.6726	71.7931	71.9239	71.9932	71.8238	72.719			48.38	58.6323	66.5998	72.2149	73.7359	73.3917	72.7265	72.7919	74.0629
48.48	59.3234	61.7297	69.6004	72.6539	72.9741	73.7448	73.405	74.0022			48.48	56.8577	60.8036	68.6444	71.7425	71.8838	71.9475	71.7677	72.6823			48.48	58.6003	66.573	72.1785	73.6789	73.3814	72.6668	72.7297	73.9936
48.58	59.3215	61.6983	69.5752	72.6268	72.9244	73.6936	73.3669	73.9798			48.58	56.8244	60.7566	68.6125	71.7263	71.8473	71.9328	71.7363	72.6366			48.58	58.5265	66.5287	72.1169	73.6575	73.3709	72.6322	72.7034	73.9969
48.68	59.2832	61.6941	69.5582	72.6006	72.8958	73.6473	73.324	73.9451			48.68	56.8554	60.7181	68.5997	71.6896	71.8325	71.9077	71.6835	72.608			48.68	58.5138	66.511	72.0726	73.6175	73.3338	72.5567	72.6444	73.9294
48.78	59.2449	61.6678	69.5403	72.5693	72.8369	73.6083	73.2923	73.9111			48.78	56.8423	60.7353	68.5766	71.6643	71.7754	71.8643	71.6105	72.617			48.78	58.5425	66.511	72.0331	73.586	73.3069	72.4877	72.6054	73.8634
48.88	59.2395	61.6511	69.5276	72.5227	72.8055	73.5848	73.2502	73.8717			48.88	56.8355	60.7039	68.5332	71.6378	71.7183	71.8484	71.5655	72.5908			48.88	58.472	66.4808	71.9934	73.5475	73.2698	72.4123	72.5309	73.7939
48.98	59.2395	61.6386	69.4801	72.5082	72.7539	73.5458	73.2153	73.8416			48.98	56.8021	60.6826	68.5127	71.6228	71.7126	71.8222	71.5296	72.5311			48.98	58.3921	66.4401	71.9333	73.4718	73.2324	72.3729	72.4656	73.7332
49.08	59.2339	61.6123	69.4415	72.4905	72.7327	73.4946	73.1692	73.7929			49.08	56.7799	60.6412	68.4947	71.586	71.652	71.7765	71.487	72.5106			49.08	58.424	66.4524	71.8638	73.4104	73.1953	72.3101	72.4456	73.6777
49.18	59.2046	61.584	69.4111	72.4676	72.7004	73.4524	73.1254	73.735			49.18	56.7466	60.6213	68.4359	71.5401	71.5961	71.7504	71.4476	72.4818			49.18	58.3921	66.4188	71.8067	73.389	73.1433	72.2471	72.3881	73.6359
49.28	59.1845	61.56	69.4101	72.4151	72.659	73.4264	73.0856	73.6941			49.28	56.7466	60.6284	68.4115	71.494	71.5527	71.7082	71.4162	72.4246			49.28	58.3056	66.4081	71.7751	73.3362	73.0836	72.1687	72.3756	73.5595
49.38	59.1644	61.5359	69.3779	72.3736	72.6129	73.4029	73.0532	73.6563			49.38	56.7064	60.5971	68.3949	71.4366	71.5333	71.6717	71.3634	72.3672			49.38	58.3507	66.3956	71.7403	73.2792	73.0793	72.1419	72.2994	73.5215
49.48	59.1663	61.518	69.3445	72.3372	72.5686	73.3599	72.9997	73.6115			49.48	56.6686	60.5758	68.363	71.4194	71.5093	71.634	71.3354	72.3558			49.48	58.3121	66.3956	71.6897	73.2505	73.0242	72.0884	72.2326	73.4762
49.58	59.1261	61.5265	69.3007	72.3126	72.5116	73.2956	72.9656	73.586			49.58	56.613	60.5572	68.3309	71.3905	71.4784	71.6021	71.3186	72.2951			49.58	58.2642	66.33	71.6406	73.1935	72.9869	72.027	72.2064	73.4415
49.68	59.0604	61.5285	69.2962	72.2788	72.471	73.264	72.9187	73.5558			49.68	56.631	60.5258	68.299	71.3331	71.4213	71.5599	71.2736	72.2665			49.68	58.2642	66.2803	71.5868	73.1307	72.9348	71.9848	72.1551	73.4033
49.78	59.0566	61.5149	69.2423	72.2499	72.4139	73.2242	72.883	73.5064			49.78	56.6352	60.5045	68.267	71.3136	71.4122	71.5201	71.2343	72.216			49.78	58.2158	66.2803	71.5505	73.1107	72.8752	71.9093	72.1161	73.374
49.88	59.0384	61.4866	69.227	72.2406	72.376	73.1893	72.8205	73.477			49.88	56.5797	60.4802	68.2157	71.2584	71.3643	71.4836	71.1984	72.161			49.88	58.2322	66.236	71.5108	73.0793	72.8604	71.8653	72.0573	73.3286
49.98	59.0258	61.4625	69.1965	72.1992	72.33	73.1495	72.7638	73.4292			49.98	56.5575	60.4263	68.1838	71.2297	71.3413	71.463	71.1804	72.0888			49.98	58.1838	66.2183	71.4604	73.0607	72.8127	71.8071	72.0028	73.2871
50.08	59.0239	61.4614	69.166	72.1644	72.3061	73.0975	72.7176	73.3976			50.08	56.5575	60.429	68.1415	71.1836	71.3094	71.4116	71.1333	72.0522			50.08	58.1519	66.1951	71.4319	73.0022	72.7889	71.752	71.9376	73.216
50.18	58.98	61.452	69.1265	72.1424	72.2738	73.0642	72.6941	73.3488			50.18	56.5506	60.4119	68.107	71.1434	71.2649	71.3661	71.1051	72.0063			50.18	58.1039	66.1472	71.3843	72.9793	72.7413	71.6892	71.8927	73.1916
50.28	58.9563	61.4311	69.1095	72.1051	72.2471	73.048	72.6406	73.3103			50.28	56.5085	60.3763	68.0559	71.0973	71.2043	71.3341	71.0951	71.9627			50.28	58.0559	66.1206	71.348	72.9393	72.7384	71.6389	71.8288	73.1551
50.38	58.9781	61.4216	69.0808	72.0569	72.2157	73.0057	72.6073	73.2716			50.38	56.4683	60.3663	68.0341	71.0514	71.1723	71.2886	71.0547	71.9031			50.38	58.0559	66.0763	71.2895	72.8936	72.7146	71.5949	71.7978	73.1049
50.48	58.9161	61.3954	69.0449	72.0458	72.1669	72.9473	72.5539	73.2214			50.48	56.4863	60.345	68.0046	71.0249	71.1529	71.2498	71.0265	71.8665			50.48	57.976	66.0852	71.2498	72.858	72.6596	71.5399	71.7356	73.0858
50.58	58.9105	61.3839	69.0197	72.0027	72.1097	72.9066	72.5076	73.1635			50.58	56.4683	60.3122	67.9535	70.9962	71.1073	71.2064	71.0008	71.8081			50.58	57.976	66.0321	71.234	72.8151	72.6074	71.5162	71.6923	73.0007
50.68	58.8832	61.3588	68.9982	71.9629	72.0702	72.8628	72.468	73.1419			50.68	56.4683	60.2795	67.9214	70.9709	71.0764	71.1586	70.9705	71.7714			50.68	57.9436	66.0321	71.2136	72.7794	72.5479	71.4802	71.6581	72.9867
50.78	58.8869	61.342	68.9704	71.9171	72.048	72.8279	72.421	73.0793			50.78	56.435	60.2367	67.9022	70.9134	71.0365	71.1323	70.9479	71.7255			50.78	57.8957	65.9664	71.1787	72.7495	72.5285	71.4377	71.6036	72.9521
50.88	58.8923	61.3305	68.9399	71.8816	72.0028	72.784	72.3836	73.0492			50.88	56.435	60.1911	67.8703	70.8674	70.9988	71.0867	70.903	71.7117			50.88	57.8637	65.9167	71.1312	72.7367	72.4854	71.3639	71.5571	72.9121
50.98	58.8649	61.3179	68.886	71.8494	71.9632	72.7458	72.3383	73.0014			50.98	56.4507	60.1769	67.8728	70.8386	70.9359	71.0719	70.8582	71.6705			50.98	57.7772	65.8901	71.0917	72.7124	72.4363	71.3388	71.5074	72.8792
51.08	58.8521	61.275	68.8582	71.8054	71.9421	72.6955	72.2977	72.9627			51.08	56.4572	60.1414	67.8294	70.8063	70.9096	71.0183	70.8188	71.6086			51.08	57.7358	65.8456	71.0647	72.6795	72.3989	71.2979	71.4561	72.8167
51.18	58.8137	61.2528	68.8493	71.7681	71.8831	72.6622	72.2571	72.9333			51.18	56.435	60.1314	67.7871	70.7523	70.8674	70.9728	70.774	71.5743			51.18	57.726	65.8191	71.0285	72.6438	72.3395	71.2726	71.3986	72.7959
51.28	58.792	61.2508	68.8205	71.7223	71.8592	72.6216	72.2126	72.8747			51.28	56.4017	60.0774	67.7552	70.7064	70.8218	70.9533	70.7425	71.5467			51.28	57.6874	65.8013	70.9809	72.6252	72.3201	71.2522	71.3318	72.709
51.38	58.792	61.2058	68.781	71.6978	71.8112	72.5696	72.1818	72.8383			51.38	56.4284	60.0588	67.7129	70.6489	70.7817	70.9123	70.7066	71.5078			51.38	57.6555	65.7977	70.9651	72.5938	72.265	71.2601	71.2883	72.6535
51.48	58.7462	61.1838	68.7676	71.6495	71.779	72.5364	72.1316	72.782			51.48	56.4128	60.0417	67.6885	70.5915	70.7805	70.8702	70.6897	71.4907			51.48	57.6075	65.7571	70.9098	72.5368	72.2278	71.2019	71.2386	72.6083
51.58	58.7059	61.167	68.7469	71.6139	71.7421	72.5128	72.1008	72.7519			51.58	56.3794	60.0488	67.6592	70.581	70.7395	70.8131	70.6448	71.4333			51.58	57.5755	65.7126	70.8701	72.5125	72.1654	71.1627	71.2046	72.5788
51.68	58.7225	61.1648	68.7128	71.5792	71.7099	72.4591	72.0594	72.7172			51.68	56.3794	60.0132	67.6464	70.5304	70.7076	70.7766	70.5887	71.4047			51.68	57.5755	65.6594	70.826	72.4911	72.1236	71.1422	71.1688	72.5095
51.78	58.6732	61.145	68.6842	71.5546	71.6555	72.4235	72.0092	72.6485			51.78	56.3837	59.9704	67.6105	70.4914	70.6927	70.7333	70.5269	71.3588			51.78	57.5755	65.6151	70.807	72.4425	72.0939	71.1233	71.1127	72.4471
51.88	58.666	61.1461	68.6473	71.5275	71.6076	72.3942	71.9662	72.6021			51.88	56.3481	59.9562	67.5951	70.4534	70.6253	70.6934	70.4875	71.3416			51.88	57.4956	65.6151	70.78	72.4339	72.0745	71.0967	71.0833	72.4019
51.98	58.6531	61.1178	68.6339	71.481	71.5726	72.3341	71.9208	72.5588			51.98	56.3461	59.9164	67.5632	70.419	70.5762	70.6615	70.4427	71.3393			51.98	57.4956	65.6097	70.7357	72.3683	72.0194	71.037	71.0445	72.3793
52.08	58.6365	61.0884	68.5899	71.4429	71.5293	72.2968	71.8843	72.5357			52.08	56.3125	59.9206	67.5311	70.3786	70.5499	70.6364	70.3977	71.3209			52.08	57.4472	65.5495	70.6804	72.3297	71.96	70.9975	70.9978	72.3306
52.18	58.5745	61.101	68.563	71.4191	71.4961	72.2545	71.8397	72.4939			52.18	56.2903	59.8993	67.5183	70.3774	70.5076	70.5793	70.3416	71.2728			52.18	57.4411	65.5245	70.6407	72.2941	71.9226	70.9819	70.9248	72.2631
52.28	58.5946	61.0496	68.5289	71.3649	71.4583	72.2123	71.8049	72.4545			52.28	56.3102	59.8964	67.4672	70.3246	70.4791	70.5338	70.2854	71.2407			52.28	57.3993	65.4821	70.5854	72.2369	71.8632	70.9191	70.9	72.1971
52.38	58.5673	61.0412	68.5056	71.3396	71.4242	72.1734	71.7708	72.4167			52.38	56.2749	59.8608	67.4351	70.2787	70.4597	70.5075	70.2406	71.1869			52.38	57.3993	65.505	70.5538	72.2342	71.8379	70.8561	70.8658	72.1571
52.48	58.518	61.0381	68.4823	71.2921	71.3671	72.1384	71.7262	72.3797			52.48	56.2726	59.8765	67.4032	70.2177	70.4162	70.4824	70.2012	71.1754			52.48	57.3513	65.4644	70.4983	72.2013	71.7946	70.8358	70.8067	72.0929
52.58	58.4904	61.0224	68.4373	71.2607	71.3384	72.0946	71.6654	72.3295			52.58	56.286	59.8466	67.3558	70.1889	70.3854	70.4459	70.1564	71.1124			52.58	57.3193	65.4376	70.4589	72.1441	71.7485	70.7776	70.7385	72.0409
52.68	58.463	60.9952	68.4095	71.2252	71.3183	72.0571	71.6411	72.2885			52.68	56.2681	59.7925	67.3327	70.1567	70.3306	70.4025	70.117	71.0757			52.68	57.3193	65.3933	70.4194	72.1084	71.6801	70.7225	70.7028	71.9732
52.78	58.4448	61.0067	68.388	71.1863	71.2952	72.019	71.5844	72.243			52.78	56.2125	59.7712	67.3008	70.1315	70.285	70.3707	70.0721	71.038			52.78	57.2714	65.349	70.356	72.1256	71.6399	70.6833	70.6407	71.9227
52.88	58.4448	60.9679	68.3467	71.1592	71.2316	71.98	71.5503	72.2051			52.88	56.2125	59.7682	67.2688	70.1026	70.2565	70.317	70.0271	71.0092			52.88	57.2394	65.3258	70.3513	72.0728	71.5803	70.6565	70.5862	71.8845
52.98	58.3992	60.9595	68.3198	71.1041	71.2113	71.9224	71.5236	72.1619			52.98	56.239	59.7141	67.2202	70.0532	70.2244	70.2715	69.9957	70.9657			52.98	57.1529	65.2834	70.3402	72.0271	71.5403	70.5811	70.5427	71.8378
53.08	58.3936	60.9186	68.2874	71.0686	71.1616	71.8875	71.4887	72.1132			53.08	56.2236	59.6786	67.2048	70.0279	70.1993	70.243	69.9541	70.9611			53.08	57.1656	65.2779	70.2817	72.0214	71.506	70.534	70.4668	71.7528
53.18	58.359	60.9134	68.2615	71.055	71.1165	71.8517	71.4685	72.0746			53.18	56.1903	59.6629	67.1638	69.982	70.1513	70.1952	69.9261	70.9004			53.18	57.1271	65.255	70.2564	71.9515	71.4643	70.471	70.4465	71.711
53.28	58.3407	60.8914	68.2417	71.0068	71.0713	71.8119	71.4328	72.036			53.28	56.1746	59.6501	67.1537	69.9244	70.1079	70.1518	69.8869	70.8854			53.28	57.105	65.2159	70.2027	71.9156	71.4315	70.4318	70.3844	71.671
53.38	58.3662	60.8589	68.2103	70.9728	71.0344	71.7689	71.4004	72.009			53.38	56.139	59.6144	67.0896	69.8876	70.0702	70.121	69.8419	70.8604			53.38	57.0857	65.2105	70.1932	71.8586	71.3943	70.4129	70.358	71.633
53.48	58.326	60.8201	68.161	70.9491	70.9865	71.7235	71.3647	71.9796			53.48	56.0858	59.6046	67.0705	69.8613	70.0142	70.0742	69.797	70.8144			53.48	57.0312	65.1894	70.1584	71.823	71.3347	70.3721	70.3176	71.5895
53.58	58.2914	60.8337	68.1143	70.9304	70.9635	71.6771	71.3275	71.9533			53.58	56.1012	59.5717	67.0513	69.8152	69.9881	70.0492	69.7576	70.7916			53.58	56.9992	65.1237	70.095	71.7872	71.2976	70.3139	70.3067	71.5304
53.68	58.2785	60.7949	68.0838	70.9009	70.9174	71.6422	71.2918	71.9255			53.68	56.0678	59.5747	66.9937	69.7727	69.948	70.0092	69.7296	70.7457			53.68	57.0246	65.1006	70.0397	71.7373	71.2574	70.2401	70.2445	71.4419
53.78	58.2767	60.7698	68.056	70.8542	70.8787	71.6008	71.261	71.8978			53.78	56.0522	59.5191	66.9706	69.7509	69.9069	69.9637	69.6825	70.6747			53.78	57.0214	65.0563	70.016	71.6916	71.2156	70.1912	70.1777	71.3935
53.88	58.2531	60.7289	68.0084	70.8229	70.8473	71.5561	71.2374	71.8769			53.88	56.0388	59.5005	66.9426	69.7347	69.8715	69.9317	69.623	70.6254			53.88	57.0312	65.0438	70.0049	71.6516	71.1785	70.1568	70.1405	71.3811
53.98	58.2257	60.7028	67.977	70.778	70.7866	71.5106	71.2042	71.8453			53.98	56.0388	59.4821	66.9105	69.6462	69.8075	69.9088	69.5836	70.5968			53.98	56.9672	65.0508	69.9447	71.6017	71.119	70.1363	70.1047	71.3517
54.08	58.1927	60.6514	67.9303	70.7314	70.7479	71.4773	71.1661	71.7965			54.08	56.0456	59.4764	66.8977	69.5968	69.7688	69.8668	69.5387	70.5394			54.08	56.9029	64.9907	69.9052	71.5445	71.0996	70.0938	70.0846	71.3031
54.18	58.189	60.6326	67.907	70.6992	70.7138	71.4262	71.1232	71.7541			54.18	56.0123	59.4649	66.8274	69.5392	69.7311	69.8303	69.4983	70.5108			54.18	56.8967	64.9586	69.8734	71.5089	71.0891	70.031	70.0659	71.2806
54.28	58.1654	60.6085	67.8873	70.6485	70.665	71.3953	71.1053	71.727			54.28	56.0123	59.4392	66.7801	69.5244	69.6682	69.804	69.4601	70.4763			54.28	56.8549	64.9889	69.8261	71.4732	71.0699	70.0278	70.0117	71.2251
54.38	58.1362	60.576	67.8379	70.6138	70.629	71.3474	71.0681	71.6885			54.38	55.9633	59.4081	66.757	69.4795	69.6283	69.7607	69.4321	70.4213			54.38	56.8549	64.9675	69.7866	71.4546	71.052	69.9681	69.9649	71.1989
54.48	58.1343	60.5456	67.8218	70.5866	70.606	71.3035	71.0243	71.6383			54.48	55.9189	59.3865	66.7211	69.4496	69.5825	69.7185	69.3871	70.4168			54.48	56.823	64.9446	69.7469	71.4018	70.9925	69.9256	69.9152	71.1522
54.58	58.138	60.5277	67.7715	70.5604	70.5719	71.2687	71.0016	71.6205			54.58	55.9231	59.3895	66.6969	69.3817	69.5369	69.6865	69.331	70.3905			54.58	56.823	64.9498	69.7074	71.3519	70.9672	69.9083	69.864	71.086
54.68	58.0941	60.4974	67.7679	70.5426	70.547	71.2288	70.9512	71.5773			54.68	55.863	59.3723	66.661	69.3323	69.4912	69.6501	69.2861	70.3446			54.68	56.775	64.9055	69.6679	71.309	70.9329	69.8502	69.8439	71.06
54.78	58.0831	60.4586	67.7347	70.5079	70.4907	71.1833	70.9099	71.5649			54.78	55.8607	59.3481	66.62	69.3036	69.4477	69.6136	69.2412	70.316			54.78	56.775	64.8789	69.6284	71.2633	70.8912	69.8486	69.8097	71.0307
54.88	58.0576	60.446	67.6943	70.4706	70.4567	71.1371	70.867	71.5293			54.88	55.8676	59.3368	66.5906	69.2747	69.3976	69.5873	69.2018	70.2701			54.88	56.7012	64.8521	69.5887	71.2306	70.8407	69.7796	69.7709	71.0116
54.98	58.0686	60.4314	67.6647	70.4351	70.4088	71.0996	70.8443	71.4977			54.98	55.8274	59.3155	66.5395	69.2288	69.3507	69.5418	69.1682	70.2553			54.98	56.743	64.8222	69.5841	71.1849	70.8213	69.7685	69.729	70.9334
55.08	58.052	60.3999	67.6521	70.3758	70.3691	71.0339	70.8111	71.4491			55.08	55.8343	59.277	66.4946	69.2	69.3084	69.5155	69.112	70.2301			55.08	56.7111	64.7813	69.5334	71.1377	70.7618	69.7323	69.7009	70.8865
55.18	58.0887	60.3779	67.6073	70.3537	70.323	71.008	70.7649	71.4197			55.18	55.8231	59.2371	66.4626	69.154	69.2799	69.4733	69.0424	70.1934			55.18	56.6885	64.7547	69.5098	71.1019	70.7245	69.7307	69.6651	70.8641
55.28	58.0485	60.3653	67.5768	70.3216	70.2899	70.986	70.7398	71.4003			55.28	55.8343	59.24	66.4307	69.139	69.2206	69.4368	68.9941	70.1555			55.28	56.6951	64.7636	69.4938	71.0663	70.7022	69.7009	69.6309	70.8396
55.38	58.0648	60.3413	67.5624	70.2885	70.2751	70.9445	70.6943	71.3626			55.38	55.812	59.2229	66.3986	69.1138	69.2023	69.4107	68.966	70.1234			55.38	56.6627	64.7191	69.4543	70.9978	70.6768	69.6663	69.5689	70.7736
55.48	58.0485	60.3004	67.5391	70.2555	70.2309	70.9064	70.6667	71.31			55.48	55.7784	59.1986	66.3757	69.1022	69.16	69.3742	68.9132	70.1074			55.48	56.7012	64.6659	69.4306	70.9521	70.6203	69.6301	69.5067	70.7512
55.58	58.0302	60.269	67.4996	70.2022	70.1986	70.8755	70.6059	71.2699			55.58	55.7784	59.1873	66.3475	69.0816	69.1235	69.3195	68.8875	70.0546			55.58	56.6627	64.6428	69.3721	70.9236	70.5831	69.5752	69.4524	70.7356
55.68	58.0375	60.2721	67.4852	70.2233	70.1618	70.8252	70.5727	71.2305			55.68	55.7049	59.1658	66.3052	69.0517	69.0663	69.2909	68.8313	69.9951			55.68	56.6246	64.6305	69.323	70.9022	70.5237	69.5122	69.426	70.7076
55.78	58.0101	60.2459	67.461	70.1869	70.1157	70.813	70.5428	71.1826			55.78	55.6961	59.1616	66.281	69.0045	69.0343	69.2624	68.7863	69.9665			55.78	56.5828	64.5594	69.3119	70.9022	70.5042	69.5154	69.3778	70.6488
55.88	57.9938	60.2344	67.4386	70.148	70.0789	70.7724	70.5104	71.1532			55.88	55.7007	59.1516	66.2323	68.9896	69.008	69.2361	68.7302	69.9206			55.88	56.5828	64.5417	69.2724	70.8664	70.4566	69.4808	69.3313	70.5741
55.98	57.9973	60.2135	67.3964	70.1209	70.0494	70.7204	70.4981	71.1054			55.98	55.6673	59.1275	66.2132	68.9471	68.9773	69.194	68.7021	69.9091			55.98	56.5348	64.4886	69.2327	70.8422	70.3972	69.4337	69.2894	70.5046
56.08	57.9662	60.1998	67.3578	70.1005	70.0115	70.6847	70.4617	71.059			56.08	55.6451	59.0974	66.1658	68.9182	68.9282	69.1484	68.6607	69.8633			56.08	56.5348	64.485	69.1489	70.7978	70.3644	69.3834	69.2194	70.5012
56.18	57.9772	60.1852	67.3443	70.0539	69.9803	70.6546	70.4228	71.0227			56.18	55.6115	59.0805	66.1172	68.8895	68.8893	69.1084	68.618	69.8312			56.18	56.6053	64.462	69.1062	70.7637	70.3004	69.3599	69.1729	70.4684
56.28	57.9297	60.161	67.3057	70.0354	69.9351	70.6319	70.3652	70.9648			56.28	55.6115	59.0619	66.0851	68.87	68.8459	69.072	68.573	69.7602			56.28	56.5348	64.4175	69.0667	70.7165	70.263	69.3315	69.1106	70.4786
56.38	57.9278	60.119	67.2797	70.0099	69.9001	70.5856	70.2866	70.9255			56.38	55.5739	59.0278	66.0492	68.8343	68.8174	69.0172	68.545	69.7774			56.38	56.5282	64.3909	69.0509	70.6595	70.2141	69.2687	69.0921	70.4042
56.48	57.9334	60.1212	67.2411	69.9981	69.8798	70.5417	70.2436	70.8892			56.48	55.5537	58.9879	66.0212	68.8011	68.7889	68.9888	68.5	69.7293			56.48	56.429	64.3678	68.9924	70.6593	70.1514	69.2247	69.0331	70.3537
56.58	57.9059	60.0981	67.2294	69.9617	69.8512	70.5117	70.1877	70.8351			56.58	55.556	58.9822	65.9891	68.7574	68.7455	68.9682	68.4551	69.6708			56.58	56.461	64.3769	68.9401	70.6266	70.1068	69.1901	68.9709	70.3537
56.68	57.8932	60.0719	67.1962	69.932	69.8144	70.4768	70.0969	70.8042			56.68	55.5337	58.9451	65.9572	68.7423	68.7089	68.9146	68.4157	69.6455			56.68	56.4225	64.3555	68.9243	70.5881	70.0697	69.1428	68.9321	70.2877
56.78	57.864	60.0426	67.1738	69.8981	69.7877	70.4452	70.0361	70.761			56.78	55.5181	58.948	65.8766	68.7148	68.6803	68.8748	68.3843	69.5826			56.78	56.4483	64.2899	68.8848	70.5524	70.0323	69.1398	68.8776	70.2824
56.88	57.8603	60.028	67.1514	69.899	69.7379	70.4045	69.9874	70.72			56.88	55.4893	58.8982	65.842	68.6745	68.6346	68.8428	68.3315	69.5252			56.88	56.4225	64.2844	68.8609	70.538	69.9952	69.1036	68.8156	70.2182
56.98	57.8476	59.9986	67.1289	69.8786	69.702	70.3687	69.9105	70.6822			56.98	55.4671	58.8982	65.8101	68.6411	68.5981	68.7836	68.2867	69.4909			56.98	56.4549	64.2722	68.8024	70.4766	69.9209	69.0674	68.7768	70.1627
57.08	57.8458	59.962	67.103	69.8371	69.6753	70.3314	69.84	70.6459			57.08	55.4335	58.8669	65.7971	68.6228	68.5718	68.7642	68.2283	69.4485			57.08	56.3684	64.2579	68.7583	70.4309	69.8835	69.0408	68.7146	70.1315
57.18	57.8109	59.9357	67.0742	69.8135	69.655	70.3078	69.7622	70.6111			57.18	55.4002	58.8568	65.7691	68.5813	68.557	68.7288	68.1856	69.405			57.18	56.3651	64.2313	68.7186	70.4068	69.8464	69.0014	68.6681	70.1089
57.28	57.7782	59.9378	67.0239	69.7804	69.595	70.2884	69.7135	70.5803			57.28	55.4047	58.824	65.7396	68.5366	68.501	68.6945	68.1542	69.3212			57.28	56.3745	64.2136	68.6949	70.3624	69.7765	68.97	68.6369	70.0309
57.38	57.7999	59.9337	67.0096	69.7491	69.572	70.2494	69.6511	70.5223			57.38	55.3891	58.7929	65.7077	68.5101	68.4828	68.6867	68.1126	69.2468			57.38	56.288	64.2136	68.6554	70.324	69.7273	68.9229	68.5981	69.958
57.48	57.8056	59.9137	66.9702	69.7262	69.5462	70.2112	69.5903	70.5045			57.48	55.3557	58.7672	65.6564	68.464	68.4291	68.6467	68.0734	69.1929			57.48	56.2946	64.1959	68.6522	70.2882	69.6902	68.8835	68.5484	69.9596
57.58	57.7873	59.8708	66.9423	69.6931	69.4918	70.1738	69.5417	70.459			57.58	55.3557	58.7486	65.5963	68.4491	68.3959	68.5703	68.0284	69.1447			57.58	56.3331	64.187	68.6078	70.2312	69.6305	68.8632	68.477	69.9043
57.68	57.8018	59.8498	66.9118	69.6711	69.4734	70.1568	69.493	70.4049			57.68	55.3335	58.7316	65.5758	68.3928	68.3513	68.5476	67.9835	69.1012			57.68	56.2946	64.1693	68.5874	70.2169	69.5934	68.8129	68.4196	69.9023
57.78	57.8128	59.8603	66.8768	69.6449	69.4283	70.1089	69.4331	70.3617			57.78	55.3002	58.7287	65.5131	68.3433	68.3	68.487	67.9442	69.0268			57.78	56.2946	64.1425	68.5762	70.174	69.516	68.7499	68.3573	69.8312
57.88	57.8018	59.8298	66.8516	69.5975	69.4026	70.0658	69.3625	70.3308			57.88	55.3002	58.6959	65.4823	68.3077	68.2407	68.4585	67.8993	68.9866			57.88	56.2466	64.1248	68.5367	70.117	69.492	68.7233	68.3138	69.7756
57.98	57.7653	59.8111	66.8149	69.5788	69.3592	70.0496	69.3049	70.2852			57.98	55.2956	58.6632	65.4517	68.2721	68.2087	68.4015	67.8655	68.9545			57.98	56.2401	64.0982	68.4734	70.0812	69.4594	68.6871	68.2921	69.755
58.08	57.7817	59.812	66.7925	69.5636	69.3306	70.0147	69.2312	70.2536			58.08	55.2666	58.6461	65.4197	68.2284	68.1812	68.3697	67.8229	68.8985			58.08	56.2848	64.0805	68.4339	70.057	69.4072	68.6117	68.2331	69.7028
58.18	57.7691	59.7754	66.7593	69.5518	69.3038	69.9789	69.1648	70.2057			58.18	55.2401	58.6033	65.3852	68.1801	68.1493	68.3332	67.7813	68.809			58.18	56.2466	64.0574	68.4181	70.0241	69.3701	68.5535	68.2362	69.6577
58.28	57.7415	59.7754	66.7377	69.5128	69.2753	69.9359	69.112	70.164			58.28	55.1999	58.5891	65.3596	68.1364	68.1207	68.2739	67.7421	68.7769			58.28	56.2466	64.054	68.3786	69.9998	69.3105	68.53	68.1788	69.6194
58.38	57.7415	59.766	66.6991	69.4688	69.2403	69.8994	69.048	70.1393			58.38	55.2087	58.5706	65.3301	68.1041	68.0807	68.2249	67.7106	68.7494			58.38	56.2147	64.0238	68.3342	69.9556	69.2956	68.4827	68.1291	69.5588
58.48	57.6868	59.7366	66.6866	69.423	69.2173	69.8669	69.018	70.0883			58.48	55.211	58.5677	65.2943	68.0788	68.0442	68.1941	67.6859	68.6887			58.48	56.1987	64.0006	68.2994	69.907	69.2585	68.4624	68.1011	69.5326
58.58	57.6648	59.7105	66.6821	69.3832	69.1629	69.8385	68.9847	70.0566			58.58	55.1777	58.5322	65.2533	68.0294	67.9916	68.1792	67.6499	68.683			58.58	56.1663	63.9563	68.2757	69.8599	69.239	68.4121	68.073	69.4841
58.68	57.6629	59.6874	66.6444	69.3443	69.1454	69.8173	68.9434	70.0056			58.68	55.1777	58.5109	65.2342	67.9904	67.9607	68.1529	67.5736	68.6429			58.68	56.2048	63.9386	68.2235	69.8028	69.2139	68.3429	68.0156	69.4337
58.78	57.6685	59.6443	66.6112	69.3044	69.1049	69.7719	68.9054	69.9832			58.78	55.1555	58.4966	65.1958	67.9605	67.9185	68.1108	67.5456	68.6165			58.78	56.2147	63.9386	68.1808	69.7815	69.1765	68.302	67.9426	69.3504
58.88	57.6685	59.6349	66.5878	69.2833	69.0984	69.7426	68.8624	69.9601			58.88	55.0954	58.4553	65.1637	67.9213	67.8866	68.0823	67.5118	68.6004			58.88	56.1663	63.9209	68.1824	69.7243	69.1394	68.2628	67.9225	69.302
58.98	57.6503	59.5983	66.5546	69.2248	69.0478	69.7012	68.8389	69.9106			58.98	55.0843	58.4538	65.119	67.8776	67.8717	68.0584	67.4558	68.557			58.98	56.1343	63.8943	68.1522	69.6886	69.0472	68.1998	67.8728	69.2462
59.08	57.623	59.5888	66.5188	69.1833	69.0072	69.6557	68.7951	69.879			59.08	55.0885	58.4183	65.0767	67.8626	67.8294	68.0138	67.4108	68.542			59.08	56.0864	63.8889	68.1222	69.6314	69.0456	68.1606	67.837	69.2237
59.18	57.6045	59.5616	66.4945	69.1453	68.9897	69.6087	68.7781	69.8411			59.18	55.082	58.404	65.0422	67.8293	67.7838	67.974	67.3681	68.5203			59.18	56.1602	63.8498	68.0574	69.5958	68.9727	68.1401	67.7905	69.156
59.28	57.6045	59.5428	66.4828	69.0902	68.9381	69.5761	68.7497	69.7887			59.28	55.0398	58.3612	64.9948	67.7914	67.7473	67.9489	67.3265	68.502			59.28	56.1183	63.8233	68.0305	69.5773	68.9458	68.0898	67.7283	69.09
59.38	57.6192	59.506	66.447	69.064	68.8994	69.5469	68.7189	69.75			59.38	54.9641	58.3641	64.9693	67.7454	67.6925	67.9056	67.2985	68.5134			59.38	56.1442	63.8055	68.0194	69.5673	68.8982	68.0457	67.6802	69.0589
59.48	57.6302	59.483	66.4155	69.0369	68.8745	69.503	68.7083	69.7052			59.48	54.9396	58.3328	64.9398	67.6822	67.6638	67.8771	67.257	68.4572			59.48	56.1311	63.7647	68.0019	69.5101	68.8641	68.0033	67.6243	69.0033
59.58	57.6192	59.4767	66.3832	69.0005	68.832	69.4624	68.6687	69.6674			59.58	54.9219	58.3114	64.9079	67.6671	67.609	67.8451	67.2479	68.4561			59.58	56.0864	63.7435	67.9671	69.4745	68.8447	67.961	67.5575	68.9338
59.68	57.5827	59.4558	66.3617	68.9632	68.8044	69.4291	68.6435	69.628			59.68	54.9219	58.2544	64.8541	67.642	67.5805	67.8063	67.2255	68.417			59.68	56.1122	63.6956	67.9276	69.4558	68.7896	67.917	67.5217	68.8783
59.78	57.5718	59.4128	66.3357	68.8979	68.7824	69.3878	68.599	69.5902			59.78	54.8661	58.2573	64.8183	67.6131	67.5553	67.7881	67.1671	68.3678			59.78	56.0864	63.6868	67.8881	69.4131	68.7599	67.8618	67.4875	68.8472
59.88	57.5771	59.3961	66.3051	68.8794	68.7474	69.3463	68.5739	69.5515			59.88	54.8618	58.2188	64.8055	67.5936	67.5097	67.7516	67.121	68.3392			59.88	56.0864	63.6636	67.8059	69.386	68.7002	67.7991	67.441	68.7985
59.98	57.5444	59.3615	66.2674	68.8319	68.6855	69.3008	68.5446	69.5253			59.98	54.8105	58.2017	64.7914	67.5672	67.4697	67.7231	67.0964	68.3392			59.98	56.0544	63.6459	67.7804	69.3318	68.6408	67.7409	67.3913	68.7603
60.08	57.5077	59.3521	66.2415	68.7845	68.6616	69.2602	68.5033	69.4728			60.08	54.8037	58.1833	64.7606	67.5211	67.4445	67.6866	67.0514	68.2968			60.08	56.045	63.6087	67.7458	69.2961	68.6035	67.6733	67.34	68.717
60.18	57.5061	59.3353	66.2172	68.7684	68.6524	69.2148	68.4684	69.4442			60.18	54.8373	58.1476	64.7287	67.4774	67.4184	67.6433	67.0234	68.2384			60.18	56.0064	63.5626	67.6824	69.249	68.5768	67.6371	67.2935	68.6614
60.28	57.4986	59.2892	66.1921	68.7193	68.6009	69.175	68.4287	69.3925			60.28	54.8216	58.1007	64.6967	67.4521	67.3612	67.6011	66.9919	68.1903			60.28	56.0064	63.5962	67.6429	69.2004	68.5366	67.576	67.278	68.6161
60.38	57.4859	59.2755	66.1598	68.6904	68.5676	69.1514	68.4068	69.357			60.38	54.8216	58.0593	64.6455	67.4234	67.3327	67.5578	66.984	68.1615			60.38	55.9745	63.5571	67.6034	69.1677	68.477	67.5349	67.2157	68.5954
60.48	57.4549	59.241	66.1365	68.6786	68.5096	69.1164	68.3662	69.3114			60.48	54.7615	58.075	64.6135	67.3866	67.3178	67.5236	66.9392	68.1215			60.48	55.9745	63.5181	67.5637	69.139	68.4398	67.4581	67.1537	68.5606
60.58	57.3908	59.2252	66.1042	68.621	68.5031	69.0848	68.3558	69.2851			60.58	54.8037	58.048	64.5367	67.3739	67.2926	67.4997	66.8942	68.1043			60.58	55.9265	63.5074	67.5242	69.082	68.3996	67.414	67.0992	68.5259
60.68	57.3889	59.198	66.0907	68.6007	68.4506	69.067	68.3226	69.2442			60.68	54.7504	58.0265	64.5112	67.3314	67.2755	67.4587	66.8662	68.047			60.68	55.8941	63.4472	67.4609	69.0604	68.3758	67.3746	67.1024	68.4963
60.78	57.3524	59.1624	66.0629	68.5533	68.4359	69.0157	68.2707	69.2094			60.78	54.7214	57.991	64.4817	67.2912	67.247	67.4232	66.8134	68.0184			60.78	55.9327	63.4152	67.4451	69.0105	68.3207	67.3229	67.0557	68.4826
60.88	57.3361	59.1058	66.0252	68.5126	68.4018	68.9922	68.2471	69.1607			60.88	54.7482	57.981	64.4383	67.2452	67.2276	67.3981	66.7651	67.9587			60.88	55.8941	63.3743	67.4246	68.9677	68.2657	67.2804	66.9905	68.413
60.98	57.294	59.089	66.0045	68.472	68.3556	68.9532	68.2195	69.1253			60.98	54.6727	57.9483	64.4216	67.2372	67.1842	67.3731	66.7201	67.906			60.98	55.8622	63.3407	67.3898	68.9177	68.2567	67.241	66.9223	68.3906
61.08	57.2666	59.0534	65.9821	68.4136	68.3096	68.937	68.1888	69.0975			61.08	54.6704	57.927	64.4024	67.2072	67.1443	67.3241	66.6809	67.8934			61.08	55.8622	63.3087	67.3661	68.8607	68.2062	67.1907	66.8817	68.3733
61.18	57.2484	59.0261	65.9454	68.383	68.2838	68.8923	68.1287	69.0643			61.18	54.6769	57.9126	64.3705	67.182	67.1122	67.2784	66.6473	67.8831			61.18	55.8142	63.2821	67.3076	68.8248	68.1822	67.1547	66.8384	68.3177
61.28	57.221	58.9957	65.9327	68.3399	68.2461	68.8842	68.1068	69.0487			61.28	54.6436	57.8771	64.3384	67.1555	67.07	67.2386	66.6191	67.8269			61.28	55.7822	63.2378	67.279	68.7678	68.1496	67.1106	66.8042	68.2831
61.38	57.1972	58.9695	65.9004	68.3085	68.2027	68.8501	68.0769	68.9916			61.38	54.6436	57.8557	64.3064	67.1245	67.0106	67.1929	66.5934	67.7777			61.38	55.8142	63.2201	67.2584	68.7322	68.1243	67.0571	66.7652	68.2691
61.48	57.1808	58.9371	65.8834	68.2654	68.1548	68.8127	68.0331	68.96			61.48	54.6168	57.8585	64.2681	67.0841	66.9808	67.1552	66.5719	67.749			61.48	55.7917	63.2147	67.2395	68.6964	68.0557	67.0132	66.7203	68.2308
61.58	57.1516	58.9055	65.8564	68.2239	68.1078	68.777	68.0024	68.9375			61.58	54.5545	57.8273	64.236	67.0578	66.9386	67.1074	66.5349	67.7031			61.58	55.7503	63.1758	67.1998	68.6507	68.0275	66.9738	66.7219	68.1875
61.68	57.1535	58.8774	65.8287	68.1959	68.0498	68.7332	67.9731	68.8966			61.68	54.5545	57.8131	64.2194	67.0475	66.9066	67.0789	66.49	67.6745			61.68	55.7183	63.1011	67.1794	68.6207	67.9932	66.9692	66.6877	68.132
61.78	57.1296	58.8438	65.7955	68.1764	68.0211	68.7104	67.9286	68.8619			61.78	54.5545	57.7702	64.1913	67.0095	66.8816	67.0197	66.462	67.6286			61.78	55.5998	63.0995	67.1446	68.5537	67.9561	66.9346	66.6487	68.1266
61.88	57.0875	58.848	65.7604	68.1475	67.9918	68.6723	67.884	68.8403			61.88	54.5545	57.756	64.1886	66.952	66.8336	66.9877	66.4058	67.6081			61.88	55.542	63.0605	67.1051	68.5109	67.9366	66.8953	66.6054	68.092
61.98	57.0438	58.7966	65.738	68.1086	67.9319	68.6471	67.8508	68.8117			61.98	54.5146	57.7362	64.14	66.9543	66.8164	66.9592	66.3778	67.5485			61.98	55.542	63.0303	67.1018	68.4652	67.9085	66.8451	66.5712	68.04
62.08	57.0328	58.7714	65.7003	68.079	67.8949	68.63	67.8159	68.77			62.08	54.4946	57.7161	64.1054	66.9094	66.7639	66.9193	66.3328	67.5141			62.08	55.5101	63.0108	67.0417	68.4181	67.8593	66.8088	66.5324	68.0173
62.18	57.0529	58.7548	65.6832	68.0333	67.8553	68.57	67.7859	68.7337			62.18	54.4545	57.7033	64.0697	66.8657	66.725	66.8737	66.3047	67.5026			62.18	55.4621	62.9983	67.0022	68.3609	67.837	66.7459	66.4515	67.9758
62.28	57.0384	58.7023	65.6582	68.0045	67.7992	68.5569	67.7551	68.6889			62.28	54.4101	57.6663	64.0339	66.8313	66.6988	66.8372	66.2654	67.4224			62.28	55.4682	62.9451	67.0131	68.3039	67.8176	66.7066	66.4608	67.9271
62.38	57.02	58.6751	65.6321	67.9689	67.7632	68.5114	67.7251	68.6525			62.38	54.3878	57.6492	64.0248	66.8024	66.6531	66.7939	66.2294	67.38			62.38	55.4301	62.9415	66.9753	68.2538	67.785	66.6863	66.4127	67.9185
62.48	56.9999	58.6363	65.6052	67.9215	67.7402	68.4733	67.6716	68.6225			62.48	54.3878	57.635	63.9967	66.7565	66.6246	66.7539	66.1869	67.325			62.48	55.4682	62.9009	66.9546	68.1968	67.7105	66.6517	66.3584	67.8663
62.58	56.9744	58.5944	65.5881	67.8987	67.7107	68.4384	67.6473	68.5954			62.58	54.3542	57.5994	63.966	66.7162	66.5845	66.7084	66.1587	67.3078			62.58	55.3596	62.8563	66.9151	68.1611	67.6852	66.5887	66.3226	67.8352
62.68	56.8795	58.5608	65.5676	67.8452	67.6489	68.4124	67.5963	68.563			62.68	54.332	57.5637	63.9097	66.6875	66.5526	66.6627	66.1027	67.2757			62.68	55.3883	62.8298	66.8882	68.1211	67.6509	66.5211	66.3024	67.7658
62.78	56.8703	58.5262	65.5388	67.8207	67.6176	68.3668	67.5678	68.5368			62.78	54.2987	57.561	63.8879	66.6415	66.4967	66.6193	66.0745	67.2471			62.78	55.3498	62.7855	66.8756	68.0683	67.6316	66.4787	66.2682	67.7067
62.88	56.8465	58.5001	65.5182	67.7885	67.5688	68.3482	67.5265	68.5051			62.88	54.2987	57.5424	63.8432	66.5955	66.4806	66.5693	66.043	67.199			62.88	55.3498	62.741	66.8123	68.0325	67.6137	66.4395	66.1781	67.6616
62.98	56.8063	58.4582	65.5065	67.764	67.542	68.3108	67.4836	68.468			62.98	54.2765	57.5453	63.8073	66.5978	66.4418	66.5202	66.0184	67.1531			62.98	55.2699	62.7358	66.7728	67.9941	67.5945	66.4127	66.1487	67.6321
63.08	56.7953	58.4476	65.4868	67.7139	67.4831	68.2678	67.4479	68.4317			63.08	54.2431	57.4855	63.7906	66.5725	66.3825	66.4883	65.9734	67.1199			63.08	55.2633	62.6701	66.7521	67.9355	67.5394	66.3924	66.1083	67.6234
63.18	56.7953	58.3973	65.4509	67.6886	67.448	68.2256	67.4219	68.39			63.18	54.2431	57.4713	63.7433	66.5472	66.3082	66.4632	65.9566	67.0557			63.18	55.2219	62.6259	66.7175	67.8898	67.4649	66.3562	66.0741	67.5366
63.28	56.7644	58.3775	65.4419	67.6454	67.4084	68.1825	67.3935	68.3506			63.28	54.2098	57.4498	63.7113	66.5092	66.2591	66.4484	65.9174	67.0156			63.28	55.26	62.6204	66.7126	67.8713	67.4278	66.3137	66.0354	67.5139
63.38	56.7497	58.3409	65.397	67.6055	67.3661	68.1468	67.349	68.319			63.38	54.1873	57.4214	63.6794	66.4805	66.2328	66.4062	65.8612	66.9606			63.38	55.2219	62.5814	66.6936	67.8185	67.4024	66.3027	65.9886	67.4897
63.48	56.706	58.3346	65.3809	67.565	67.3274	68.1095	67.3369	68.2757			63.48	54.154	57.4029	63.6755	66.4633	66.2076	66.3755	65.8421	66.9297			63.48	55.2379	62.5459	66.6509	67.78	67.3577	66.2509	65.9622	67.4237
63.58	56.7095	58.2958	65.3504	67.5446	67.2979	68.0671	67.2882	68.2394			63.58	54.1808	57.3858	63.6473	66.4265	66.162	66.315	65.7994	66.8895			63.58	55.1416	62.5157	66.6177	67.7257	67.3087	66.188	65.9031	67.375
63.68	56.6912	58.2873	65.3297	67.5091	67.2389	68.0355	67.2501	68.1985			63.68	54.1275	57.3501	63.6257	66.362	66.1049	66.258	65.7714	66.8437			63.68	55.1096	62.4928	66.5877	67.6685	67.3041	66.1487	65.8644	67.3595
63.78	56.6602	58.2675	65.3028	67.4811	67.2205	67.9868	67.2225	68.1761			63.78	54.0984	57.3402	63.5962	66.3517	66.0593	66.226	65.7264	66.7978			63.78	55.1096	62.4483	66.5512	67.6299	67.2714	66.0858	65.8443	67.3195
63.88	56.6583	58.258	65.2696	67.4438	67.1781	67.9438	67.1836	68.1483			63.88	54.0984	57.2932	63.577	66.3333	66.0306	66.2009	65.7084	66.7692			63.88	55.0776	62.4217	66.5039	67.5757	67.2119	66.0828	65.8101	67.2502
63.98	56.6309	58.234	65.2418	67.4159	67.1514	67.8877	67.1415	68.1005			63.98	54.0984	57.2719	63.5449	66.2884	65.9713	66.144	65.6703	66.7292			63.98	55.0776	62.3774	66.4881	67.5186	67.1746	66.026	65.7479	67.2206
64.08	56.6001	58.1909	65.2113	67.4049	67.1024	67.8406	67.092	68.0795			64.08	54.0583	57.2746	63.4976	66.27	65.953	66.1075	65.6197	66.6832			64.08	55.0297	62.3472	66.4326	67.4973	67.1331	66.0103	65.7743	67.2015
64.18	56.5872	58.1774	65.1835	67.3744	67.0702	67.8081	67.0588	68.0402			64.18	54.0204	57.2577	63.4619	66.2275	65.9142	66.0698	65.5749	66.6237			64.18	55.0297	62.3064	66.3931	67.4472	67.0824	65.9679	65.6982	67.1477
64.28	56.5634	58.1521	65.1395	67.3269	67.0426	67.744	67.0256	68.0039			64.28	54.0204	57.2435	63.4425	66.1988	65.8673	66.0414	65.5467	66.5892			64.28	55.0231	62.2798	66.3852	67.4216	67.0363	65.9051	65.6672	67.1235
64.38	56.5269	58.1312	65.1251	67.316	67.0214	67.7261	66.9721	67.98			64.38	53.9939	57.2334	63.4005	66.1701	65.8388	65.9957	65.5221	66.5652			64.38	55.0137	62.1946	66.3487	67.3759	67.0035	65.8657	65.6314	67.0889
64.48	56.4995	58.1114	65.0829	67.2905	66.9837	67.6807	66.9534	67.939			64.48	53.9871	57.2006	63.3659	66.1505	65.8023	65.9637	65.4569	66.5285			64.48	55.0137	62.1733	66.3139	67.3187	66.929	65.8108	65.6035	67.0627
64.58	56.4722	58.0861	65.0802	67.2533	66.968	67.6595	66.9032	67.8989			64.58	53.9648	57.158	63.3492	66.124	65.7565	65.9102	65.4153	66.517			64.58	54.9657	62.1467	66.2744	67.2831	66.9067	65.7715	65.5258	67.0124
64.68	56.4539	58.0663	65.0363	67.2084	66.9302	67.6116	66.8829	67.8726			64.68	53.9648	57.1607	63.3338	66.0918	65.728	65.8908	65.3941	66.5022			64.68	54.9337	62.1167	66.2507	67.2475	66.8696	65.7085	65.4606	66.9516
64.78	56.4574	58.0589	65.0093	67.1788	66.9154	67.5799	66.8383	67.8347			64.78	53.9315	57.1437	63.3018	66.0493	65.6995	65.8474	65.3312	66.4598			64.78	54.9337	62.1024	66.2112	67.2116	66.7996	65.6693	65.4341	66.9498
64.88	56.4137	58.0338	64.9789	67.1703	66.8813	67.5385	66.7977	67.8078			64.88	53.9315	57.1195	63.2864	66.0091	65.6708	65.819	65.3131	66.4689			64.88	54.8854	62.0493	66.1874	67.1802	66.7684	65.6096	65.3751	66.9118
64.98	56.4081	57.9918	64.9618	67.1237	66.8445	67.489	66.745	67.7745			64.98	53.9093	57.108	63.2571	66.0228	65.6366	65.8019	65.2548	66.4563			64.98	54.9337	62.0314	66.1446	67.1333	66.7177	65.575	65.3518	66.8423
65.08	56.4027	57.9762	64.9286	67.1026	66.8196	67.4435	66.7167	67.7429			65.08	53.876	57.0725	63.225	65.9826	65.5967	65.7562	65.2155	66.406			65.08	54.9018	62.0137	66.1242	67.0647	66.676	65.5482	65.3363	66.8458
65.18	56.3679	57.9657	64.9008	67.0704	66.7882	67.3833	66.694	67.7128			65.18	53.8936	57.0539	63.1867	65.9493	65.5795	65.7164	65.1706	66.3567			65.18	54.9018	61.9694	66.0687	67.0432	66.6343	65.5043	65.2741	66.8076
65.28	56.3588	57.9625	64.8676	67.0415	66.7487	67.3411	66.6544	67.6765			65.28	53.8871	57.0511	63.1893	65.9228	65.5624	65.6844	65.1257	66.3246			65.28	54.8534	61.9462	66.0213	67.0119	66.5897	65.4462	65.215	66.7816
65.38	56.3424	57.9605	64.8389	67.0026	66.7155	67.3152	66.5992	67.6285			65.38	53.8469	57.0112	63.1611	65.8768	65.5339	65.6787	65.0695	66.2799			65.38	54.8214	61.8985	65.966	66.9704	66.5346	65.4209	65.1733	66.7521
65.48	56.3314	57.9269	64.8075	66.9637	66.7063	67.2883	66.5805	67.5953			65.48	53.809	56.987	63.129	65.8366	65.503	65.6434	65.0504	66.2558			65.48	54.8214	61.854	65.9421	66.9333	66.4752	65.347	65.1188	66.6861
65.58	56.3078	57.9322	64.7725	66.9475	66.6593	67.2559	66.5595	67.5621			65.58	53.8424	56.9301	63.101	65.8079	65.471	65.6138	64.9965	66.2386			65.58	54.7993	61.8418	65.9026	66.9034	66.4379	65.3267	65.0924	66.6599
65.68	56.2893	57.9206	64.7249	66.9009	66.6335	67.2153	66.5173	67.5343			65.68	53.8201	56.9159	63.0753	65.7618	65.4596	65.6103	64.965	66.2227			65.68	54.812	61.7866	65.8632	66.8833	66.4007	65.2686	65.0333	66.6374
65.78	56.2711	57.9132	64.7123	66.8637	66.5994	67.186	66.4881	67.5058			65.78	53.8201	56.9159	63.0396	65.7159	65.4219	65.5738	64.937	66.1813			65.78	54.7735	61.7655	65.8425	66.8476	66.3262	65.2418	65.049	66.5992
65.88	56.2711	57.8849	64.6791	66.8332	66.5755	67.143	66.4573	67.4772			65.88	53.7868	56.8916	63.0203	65.6698	65.391	65.5282	64.9123	66.1253			65.88	54.7255	61.7087	65.8077	66.8233	66.2668	65.182	64.9822	66.5699
65.98	56.2437	57.8682	64.6585	66.8078	66.5404	67.1235	66.4184	67.4456			65.98	53.7868	56.8731	62.9846	65.6239	65.3717	65.4998	64.873	66.0644			65.98	54.6935	61.6944	65.7682	66.772	66.2519	65.1615	64.9403	66.5299
66.08	56.2164	57.8577	64.6253	66.7858	66.5035	67.0813	66.4006	67.4154			66.08	53.7868	56.8375	62.9564	65.595	65.3568	65.4712	64.8371	66.0324			66.08	54.6456	61.6501	65.7333	66.7506	66.2593	65.1034	64.9013	66.5074
66.18	56.2384	57.8063	64.6101	66.7274	66.4713	67.0391	66.3641	67.3907			66.18	53.7467	56.8233	62.9436	65.5491	65.3146	65.4507	64.7944	65.9819			66.18	54.6456	61.6446	65.7129	66.7049	66.1923	65.0641	64.8781	66.4743
66.28	56.2035	57.7876	64.567	66.7147	66.4344	67.0244	66.3236	67.3482			66.28	53.7267	56.8189	62.9115	65.5203	65.2655	65.4233	64.7552	65.9533			66.28	54.5652	61.6056	65.6449	66.6806	66.1551	65.0611	64.8099	66.4639
66.38	56.1708	57.7896	64.5194	66.6672	66.3957	66.9773	66.2911	67.3096			66.38	53.7313	56.802	62.8924	65.5088	65.2826	65.4278	64.7102	65.9155			66.38	54.6423	61.579	65.6179	66.662	66.1328	65.006	64.7693	66.4257
66.48	56.1287	57.7697	64.4933	66.6283	66.3856	66.957	66.2571	67.2888			66.48	53.7091	56.8047	62.8706	65.4801	65.2541	65.4143	64.6955	65.8834			66.48	54.5812	61.5347	65.6147	66.6263	66.0806	64.9809	64.7492	66.3424
66.58	56.1215	57.7717	64.4835	66.585	66.3644	66.9115	66.2117	67.2509			66.58	53.7091	56.7733	62.8604	65.4342	65.2255	65.3835	64.6709	65.8753			66.58	54.5812	61.5082	65.5703	66.5721	66.054	64.9463	64.7383	66.3095
66.68	56.1067	57.7508	64.4341	66.5419	66.3312	66.8676	66.206	67.2116			66.68	53.7091	56.7378	62.8373	65.4053	65.1969	65.3607	64.626	65.8674			66.68	54.5333	61.4905	65.5309	66.5406	66.0063	64.907	64.6763	66.2608
66.78	56.0574	57.7351	64.3928	66.4953	66.2925	66.8279	66.1679	67.1806			66.78	53.6757	56.7278	62.8091	65.3766	65.1684	65.3617	64.59	65.7951			66.78	54.5013	61.446	65.4914	66.5193	65.969	64.8441	64.656	66.1966
66.88	56.0464	57.7121	64.3561	66.486	66.2658	66.7849	66.1331	67.1513			66.88	53.6712	56.6951	62.7772	65.3479	65.1649	65.3287	64.5496	65.7688			66.88	54.5271	61.4194	65.4835	66.4979	65.9318	64.8175	64.5985	66.148
66.98	56.0338	57.7079	64.3354	66.4513	66.2548	66.7596	66.1104	67.1041			66.98	53.631	56.6738	62.7772	65.3054	65.1535	65.283	64.5417	65.7126			66.98	54.4853	61.3892	65.4756	66.4736	65.9139	64.8159	64.5598	66.1184
67.08	56.0191	57.6722	64.2987	66.4267	66.2226	66.7248	66.0844	67.0802			67.08	53.6643	56.6594	62.7286	65.2467	65.1147	65.2546	64.5081	65.6805			67.08	54.4853	61.3751	65.4519	66.4193	65.8916	64.797	64.51	66.0909
67.18	56.0191	57.6565	64.2655	66.3954	66.181	66.6931	66.0423	67.0393			67.18	53.6689	56.6239	62.694	65.2156	65.0656	65.2318	64.4687	65.6484			67.18	54.4533	61.3485	65.4122	66.408	65.8053	64.742	64.4975	66.0646
67.28	55.9898	57.623	64.2439	66.3564	66.1506	66.655	66.0236	67.0046			67.28	53.6757	56.6025	62.6812	65.1697	65.037	65.1748	64.4239	65.5888			67.28	54.4533	61.304	65.3727	66.3908	65.7831	64.7183	64.4432	66.0264
67.38	55.9606	57.6041	64.2187	66.3327	66.1359	66.6241	66.0026	66.9736			67.38	53.6245	56.567	62.6365	65.1547	65.0085	65.1553	64.4092	65.5602			67.38	54.4054	61.2597	65.3332	66.3552	65.7086	64.6744	64.3965	66.004
67.48	55.9333	57.5853	64.1864	66.2929	66.0999	66.5843	65.9759	66.9404			67.48	53.6156	56.5783	62.6044	65.1386	65.0028	65.1428	64.4047	65.5453			67.48	54.4054	61.2332	65.3047	66.3237	65.6893	64.6398	64.3532	65.9587
67.58	55.9185	57.5496	64.1424	66.2472	66.0696	66.5713	65.9345	66.8949			67.58	53.6199	56.584	62.5661	65.1236	64.9628	65.0892	64.3621	65.52			67.58	54.4115	61.21	65.2935	66.2952	65.6343	64.6004	64.319	65.9049
67.68	55.9022	57.5098	64.12	66.2371	66.0317	66.5299	65.902	66.8733			67.68	53.6199	56.5242	62.5533	65.0949	64.932	65.0608	64.334	65.5007			67.68	54.373	61.1889	65.254	66.2623	65.5969	64.6036	64.3035	65.8616
67.78	55.8566	57.5067	64.0922	66.1921	65.9875	66.4876	65.8656	66.8362			67.78	53.6467	56.5099	62.5212	65.0488	64.9023	65.0323	64.306	65.4571			67.78	54.341	61.1444	65.1955	66.2267	65.5598	64.569	64.2645	65.8251
67.88	55.8821	57.4762	64.0706	66.1625	65.958	66.4543	65.8323	66.7984			67.88	53.6532	56.4815	62.4893	65.0201	64.8886	65.0174	64.261	65.4135			67.88	54.2931	61.1001	65.1939	66.2152	65.5001	64.5393	64.2303	65.7834
67.98	55.8547	57.4679	64.0303	66.1354	65.9166	66.4113	65.8031	66.7366			67.98	53.6532	56.4558	62.4381	64.9742	64.8601	64.9615	64.2419	65.3883			67.98	54.2931	61.0824	65.1512	66.1838	65.4927	64.4984	64.1947	65.7332
68.08	55.8474	57.449	63.9891	66.0965	65.8806	66.3747	65.7723	66.7188			68.08	53.6199	56.446	62.4188	64.9432	64.8006	64.9296	64.2071	65.386			68.08	54.2451	61.0379	65.1163	66.1481	65.463	64.459	64.1325	65.6621
68.18	55.851	57.4259	63.9541	66.071	65.8446	66.3423	65.7342	66.6971			68.18	53.5709	56.4245	62.3869	64.9167	64.7709	64.884	64.2027	65.3734			68.18	54.1972	61.0113	65.0831	66.1125	65.4079	64.4433	64.1015	65.5788
68.28	55.8182	57.4155	63.9235	66.0507	65.8291	66.3041	65.6929	66.6663			68.28	53.582	56.3889	62.3549	64.9305	64.7424	64.8829	64.1432	65.331			68.28	54.1652	60.967	65.091	66.0767	65.402	64.4387	64.0782	65.5145
68.38	55.8236	57.4124	63.8688	66.0312	65.7866	66.2724	65.6468	66.6246			68.38	53.5532	56.332	62.3228	64.9224	64.6921	64.844	64.1038	65.3024			68.38	54.1906	60.9262	65.0325	66.0624	65.3559	64.4165	64.0579	65.4832
68.48	55.7962	57.3736	63.8418	65.9761	65.7387	66.2383	65.6183	66.5875			68.48	53.5532	56.3105	62.2717	64.8763	64.643	64.8213	64.0701	65.2829			68.48	54.2353	60.8783	65.0167	65.9939	65.2919	64.3727	64.016	65.4537
68.58	55.7925	57.3632	63.8159	65.9482	65.7157	66.2091	65.5875	66.5682			68.58	53.5199	56.275	62.2398	64.8476	64.6259	64.7757	64.0309	65.2393			68.58	54.1972	60.8605	64.9693	65.9696	65.2666	64.3568	63.9772	65.4103
68.68	55.7579	57.3244	63.7754	65.9195	65.677	66.1668	65.5235	66.518			68.68	53.5242	56.2608	62.2077	64.8304	64.5801	64.7483	64.0027	65.2267			68.68	54.1652	60.8074	64.9108	65.9511	65.2471	64.3332	63.9385	65.3668
68.78	55.7415	57.3138	63.7476	65.8762	65.6457	66.132	65.5008	66.4678			68.78	53.531	56.201	62.1861	64.7764	64.5208	64.7038	63.9579	65.2083			68.78	54.2131	60.7631	64.8901	65.9411	65.2279	64.294	63.912	65.3079
68.88	55.7287	57.2898	63.7189	65.8686	65.6198	66.1084	65.4603	66.4485			68.88	53.4977	56.1939	62.1374	64.7384	64.4911	64.6731	63.9432	65.1683			68.88	54.1652	60.7363	64.8743	65.8954	65.1728	64.2972	63.8639	65.2628
68.98	55.7048	57.2552	63.683	65.8221	65.5729	66.0711	65.4359	66.4238			68.98	53.4977	56.1611	62.0925	64.7097	64.4488	64.6275	63.9017	65.0904			68.98	54.1652	60.7186	64.8695	65.8455	65.1355	64.2783	63.8343	65.2455
69.08	55.6775	57.2657	63.6714	65.789	65.5396	66.0353	65.4117	66.3752			69.08	53.4752	56.1569	62.0734	64.6809	64.4374	64.5955	63.8737	65.064			69.08	54.0848	60.692	64.8158	65.8369	65.094	64.2232	63.8142	65.176
69.18	55.6136	57.2531	63.6408	65.767	65.5111	66.0068	65.3614	66.3203			69.18	53.4419	56.1042	62.0119	64.6349	64.3917	64.5704	63.8287	65.0526			69.18	54.0848	60.6478	64.8063	65.7883	65.0612	64.2123	63.7862	65.1533
69.28	55.6136	57.2123	63.605	65.7348	65.4669	65.9687	65.3379	66.3017			69.28	53.3906	56.0728	61.9774	64.6177	64.362	64.5249	63.7894	65.0216			69.28	54.0787	60.6087	64.7715	65.7699	65.0358	64.1761	63.7442	65.1153
69.38	55.5863	57.1955	63.5789	65.7153	65.4301	65.9346	65.3006	66.2577			69.38	53.4197	56.0471	61.9454	64.6027	64.338	64.4792	63.7703	64.9907			69.38	54.0369	60.559	64.7557	65.7127	64.9749	64.1556	63.7054	65.0891
69.48	55.5496	57.1786	63.544	65.684	65.4033	65.9037	65.2569	66.2237			69.48	53.4154	56.0287	61.9135	64.5867	64.3198	64.4564	63.7444	64.9471			69.48	54.0369	60.5324	64.6972	65.6913	64.9465	64.1212	63.6665	65.0389
69.58	55.5496	57.1483	63.509	65.6645	65.3692	65.8622	65.2098	66.1635			69.58	53.4285	56.0329	61.8814	64.52	64.2661	64.4109	63.7299	64.9013			69.58	53.9889	60.5111	64.6686	65.6556	64.9122	64.0944	63.6619	65.0111
69.68	55.5222	57.1378	63.4963	65.6171	65.3489	65.8233	65.1604	66.1319			69.68	53.3974	56.0187	61.8519	64.4911	64.2467	64.3823	63.6884	64.9035			69.68	53.9889	60.4613	64.6291	65.6726	64.8528	64.0739	63.6277	64.9747
69.78	55.5096	57.1148	63.456	65.5951	65.3085	65.7932	65.128	66.0933			69.78	53.3641	55.983	61.8175	64.4624	64.2205	64.3367	63.6602	64.8497			69.78	53.9955	60.4613	64.5896	65.6456	64.8156	64.0377	63.547	64.9156
69.88	55.5204	57.0906	63.4426	65.5434	65.2669	65.768	65.0931	66.0508			69.88	53.3596	55.9616	61.7854	64.4417	64.2011	64.3083	63.6063	64.8211			69.88	53.957	60.4436	64.5785	65.6056	64.8333	63.9954	63.5034	64.8896
69.98	55.4547	57.0645	63.4103	65.5188	65.2384	65.7388	65.0817	66.0331			69.98	53.3086	55.9376	61.7638	64.4164	64.1576	64.2797	63.5648	64.7409			69.98	53.957	60.4171	64.5659	65.5842	64.7857	63.9876	63.4647	64.8409
70.08	55.4254	57.0466	63.3824	65.4918	65.2043	65.6966	65.0404	65.9875			70.08	53.275	55.919	61.7343	64.3992	64.1427	64.2455	63.5402	64.7008			70.08	53.877	60.3993	64.5499	65.5599	64.7411	63.956	63.4024	64.8289
70.18	55.431	57.0142	63.36	65.4536	65.1582	65.66	65.0226	65.9442			70.18	53.2527	55.8933	61.683	64.3843	64.1176	64.2171	63.4896	64.6687			70.18	53.877	60.3728	64.5026	65.5299	64.7381	63.9041	63.3824	64.7645
70.28	55.4182	56.9963	63.324	65.4299	65.1564	65.6373	64.9723	65.8963			70.28	53.2707	55.8335	61.6511	64.3418	64.1142	64.1714	63.4458	64.6435			70.28	53.7967	60.3283	64.474	65.4914	64.7188	63.8727	63.3482	64.7074
70.38	55.3541	56.9828	63.2927	65.4037	65.125	65.5959	64.9512	65.8524			70.38	53.2083	55.8293	61.6344	64.2877	64.0639	64.1429	63.4189	64.5975			70.38	53.7487	60.3017	64.4473	65.4557	64.7143	63.8508	63.3327	64.6638
70.48	55.334	56.9628	63.2899	65.369	65.0762	65.5724	64.9107	65.8152			70.48	53.1904	55.8021	61.591	64.2555	64.0148	64.1292	63.3739	64.5861			70.48	53.7745	60.284	64.4361	65.4371	64.6817	63.8381	63.2985	64.6345
70.58	55.3067	56.9565	63.264	65.3368	65.0559	65.561	64.8872	65.7858			70.58	53.1639	55.7722	61.5679	64.1979	64.0001	64.0859	63.3571	64.5265			70.58	53.7008	60.2663	64.3632	65.3843	64.6563	63.8178	63.2394	64.5945
70.68	55.3085	56.9209	63.2326	65.3029	65.0218	65.5301	64.8686	65.7365			70.68	53.1681	55.7409	61.5461	64.1692	63.9749	64.0403	63.3122	64.5082			70.68	53.6688	60.222	64.376	65.3315	64.6622	63.7832	63.2007	64.5372
70.78	55.2849	56.9105	63.1957	65.2886	64.9905	65.4952	64.828	65.6986			70.78	53.1417	55.7382	61.4873	64.1232	63.9292	64.0027	63.3009	64.483			70.78	53.659	60.1546	64.3317	65.313	64.6295	63.7361	63.2036	64.5285
70.88	55.2356	56.8936	63.1688	65.2513	64.9537	65.4789	64.8078	65.6685			70.88	53.1192	55.7083	61.4527	64.0945	63.9099	63.9548	63.2729	64.4544			70.88	53.6368	60.1066	64.3175	65.2558	64.61	63.7094	63.1694	64.4903
70.98	55.2519	56.8654	63.1383	65.225	64.9158	65.4432	64.7819	65.6306			70.98	53.0858	55.6698	61.4437	64.068	63.8835	63.9126	63.2167	64.4349			70.98	53.6368	60.0746	64.2938	65.2202	64.5818	63.6731	63.1665	64.473
71.08	55.2391	56.836	63.1195	65.1844	64.9002	65.4059	64.7364	65.5773			71.08	53.0257	55.6512	61.4144	64.0369	63.855	63.8807	63.1718	64.3913			71.08	53.5885	60.0764	64.2685	65.1846	64.5476	63.6134	63.1277	64.4297
71.18	55.2064	56.8193	63.0863	65.1573	64.8476	65.3742	64.7024	65.5488			71.18	52.997	55.6341	61.4016	64.0175	63.8185	63.8499	63.155	64.3763			71.18	53.5885	60.0215	64.2415	65.1659	64.5283	63.5788	63.0841	64.3828
71.28	55.2173	56.792	63.0504	65.1327	64.8145	65.3433	64.6618	65.504			71.28	53.0081	55.5814	61.3504	63.9795	63.7922	63.8145	63.1135	64.334			71.28	53.5565	59.9699	64.2448	65.1345	64.5075	63.5396	63.0609	64.3515
71.38	55.1879	56.7658	63.0262	65.0683	64.7924	65.3173	64.6392	65.47			71.38	52.997	55.563	61.2993	63.9335	63.7637	63.7781	63.0988	64.3053			71.38	53.595	59.9415	64.2257	65.0989	64.4881	63.4766	63.0406	64.3601
71.48	55.1935	56.7679	62.9983	65.0632	64.7574	65.2759	64.6075	65.4406			71.48	52.9369	55.5444	61.2672	63.8875	63.7317	63.7359	63.0708	64.2744			71.48	53.5565	59.9079	64.1863	65.0559	64.451	63.4374	63.0064	64.3306
71.58	55.168	56.7313	62.9804	65.0149	64.7454	65.2459	64.5702	65.4214			71.58	52.9078	55.4746	61.2198	63.8587	63.7065	63.7004	63.0258	64.2423			71.58	53.5565	59.8759	64.1624	65.0203	64.4136	63.3871	62.9676	64.2821
71.68	55.1423	56.727	62.957	64.9896	64.7038	65.2216	64.5467	65.3851			71.68	52.8745	55.4348	61.2121	63.807	63.6916	63.6755	62.9977	64.2046			71.68	53.5245	59.853	64.1229	64.996	64.3944	63.3164	62.9289	64.2559
71.78	55.1332	56.7187	62.9203	64.9667	64.6661	65.2012	64.5281	65.3727			71.78	52.8411	55.4206	61.184	63.7552	63.6665	63.6219	62.9831	64.1713			71.78	53.4766	59.8671	64.1071	64.9775	64.3586	63.307	62.8899	64.2126
71.88	55.0747	56.6872	62.9104	64.9345	64.6146	65.1566	64.4932	65.3442			71.88	52.8189	55.3991	61.152	63.7265	63.6415	63.5556	62.9585	64.1449			71.88	53.4766	59.8405	64.0676	64.9203	64.3168	63.2724	62.8511	64.1815
71.98	55.0895	56.6872	62.8781	64.9006	64.5822	65.1053	64.4617	65.3225			71.98	52.7967	55.3607	61.1392	63.6955	63.6037	63.5158	62.9191	64.0853			71.98	53.3966	59.7962	64.0437	64.8876	64.2976	63.2283	62.8309	64.1553
72.08	55.0656	56.6631	62.8511	64.8812	64.5316	65.0916	64.4462	65.2909			72.08	52.7631	55.3422	61.1073	63.6804	63.5866	63.4701	62.8743	64.0498			72.08	53.3483	59.766	64.0042	64.8675	64.2648	63.1937	62.7734	64.1433
72.18	55.0474	56.6421	62.8305	64.8354	64.5104	65.0721	64.4113	65.2631			72.18	52.7631	55.3067	61.0663	63.6506	63.558	63.4246	62.8573	64.0074			72.18	53.3003	59.7642	63.9773	64.8348	64.2277	63.1497	62.7346	64.0789
72.28	55.0474	56.6096	62.8071	64.8066	64.4865	65.0218	64.3798	65.2322			72.28	52.7076	55.2852	61.0688	63.6116	63.5124	63.3961	62.8293	63.9708			72.28	53.3003	59.727	63.941	64.799	64.168	63.1153	62.6772	64.0304
72.38	54.987	56.5824	62.7749	64.7846	64.4524	65.0088	64.3465	65.2221			72.38	52.7076	55.271	61.0177	63.5827	63.4837	63.3675	62.7844	63.9501			72.38	53.2683	59.6986	63.9331	64.742	64.1309	63.0758	62.6414	63.9782
72.48	54.998	56.5562	62.7435	64.7423	64.421	64.973	64.3205	65.1935			72.48	52.6187	55.2496	60.9754	63.5229	63.4381	63.339	62.7259	63.9215			72.48	53.2683	59.672	63.8934	64.7162	64.1309	63.0493	62.5917	63.9489
72.58	54.9833	56.5216	62.7291	64.716	64.3898	64.9259	64.2857	65.1719			72.58	52.6187	55.1928	60.9563	63.4907	63.4232	63.322	62.6834	63.8894			72.58	53.2683	59.6454	63.8777	64.6877	64.1012	63.0131	62.5823	63.9089
72.68	55.0053	56.5164	62.6915	64.7042	64.3555	64.9064	64.2501	65.1341			72.68	52.6187	55.1401	60.8999	63.4828	63.3982	63.2649	62.6384	63.8641			72.68	53.2236	59.6186	63.873	64.6563	64.0863	62.9736	62.5481	63.8862
72.78	54.9616	56.4807	62.66	64.6779	64.2994	64.8707	64.2355	65.1063			72.78	52.5517	55.1144	60.8704	63.4276	63.3695	63.2272	62.5936	63.8608			72.78	53.1724	59.6009	63.8145	64.6349	64.049	62.9344	62.5513	63.8256
72.88	54.9524	56.462	62.6574	64.6338	64.2985	64.8455	64.2023	65.0824			72.88	52.5563	55.0788	60.8385	63.4126	63.3239	63.1965	62.5957	63.8241			72.88	53.1404	59.5832	63.7985	64.5848	64.0118	62.8716	62.4939	63.7787
72.98	54.9632	56.4546	62.6313	64.5966	64.2644	64.7935	64.1819	65.0638			72.98	52.5629	55.0644	60.8066	63.3872	63.2953	63.1772	62.571	63.7782			72.98	53.0925	59.5566	63.759	64.5278	63.9747	62.8511	62.4551	63.7178
73.08	54.9377	56.4463	62.5927	64.5762	64.2322	64.7602	64.1544	65.029			73.08	52.5073	55.0431	60.7745	63.3413	63.2668	63.1338	62.5262	63.7405			73.08	53.1306	59.5124	63.7432	64.5035	63.9552	62.8165	62.3929	63.718
73.18	54.9104	56.4012	62.5568	64.5534	64.1778	64.7245	64.1196	65.0051			73.18	52.5073	54.9934	60.7401	63.3079	63.2302	63.1168	62.507	63.7186			73.18	53.1404	59.4892	63.7195	64.4379	63.9225	62.8008	62.3774	63.6885
73.28	54.9323	56.3917	62.5343	64.534	64.1482	64.6936	64.1001	64.9842			73.28	52.5028	54.9463	60.6914	63.2654	63.1868	63.0677	62.4812	63.675			73.28	53.1306	59.4679	63.68	64.3993	63.9076	62.7662	62.3308	63.6225
73.38	54.8975	56.3644	62.5281	64.5026	64.1197	64.6725	64.0701	64.9773			73.38	52.474	54.9079	60.6786	63.247	63.1583	63.0369	62.4363	63.6464			73.38	53.0699	59.4501	63.6561	64.375	63.8705	62.7302	62.2919	63.5965
73.48	54.861	56.3394	62.4877	64.4856	64.0708	64.6498	64.0377	64.9464			73.48	52.474	54.8865	60.6555	63.2147	63.1434	62.9913	62.4105	63.6005			73.48	53.0892	59.4236	63.6166	64.3635	63.8257	62.7064	62.2531	63.5321
73.58	54.8648	56.3152	62.4616	64.4476	64.0248	64.5856	64.0069	64.9139			73.58	52.4518	54.851	60.6274	63.1722	63.1182	62.9628	62.406	63.5891			73.58	53.0699	59.4059	63.5771	64.3065	63.7885	62.6437	62.2096	63.4836
73.68	54.8538	56.2911	62.442	64.3985	63.9879	64.5555	63.9793	64.8846			73.68	52.4518	54.8153	60.5954	63.1595	63.0589	62.9285	62.3633	63.5169			73.68	53.0281	59.3793	63.5375	64.2709	63.7514	62.6044	62.1754	63.4472
73.78	54.8063	56.2712	62.4187	64.3383	63.9557	64.5199	63.9542	64.846			73.78	52.4783	54.7939	60.5633	63.1459	63.0406	62.9092	62.3353	63.4895			73.78	53.006	59.3348	63.517	64.2466	63.714	62.5885	62.1304	63.3881
73.88	54.7881	56.2471	62.3747	64.3112	63.9299	64.4735	63.921	64.836			73.88	52.4518	54.7797	60.5365	63.094	62.9905	62.9	62.2903	63.4115			73.88	53.0121	59.3348	63.498	64.2166	63.6769	62.5682	62.0901	63.3361
73.98	54.7916	56.2314	62.3611	64.2807	63.917	64.4297	63.8812	64.7997			73.98	52.425	54.7555	60.516	63.0481	62.9836	62.8431	62.2476	63.3829			73.98	53.0187	59.2905	63.4585	64.1638	63.6397	62.5101	62.0511	63.3239
74.08	54.7771	56.2125	62.3262	64.2714	63.8792	64.4037	63.8569	64.7742			74.08	52.3515	54.7227	60.4867	63.0355	62.9414	62.8145	62.2061	63.3371			74.08	52.9416	59.2515	63.4427	64.1208	63.6024	62.4707	61.9891	63.3101
74.18	54.746	56.1811	62.3055	64.2324	63.8267	64.3679	63.8317	64.7572			74.18	52.3561	54.69	60.438	63.0285	62.9264	62.7804	62.1836	63.3083			74.18	52.9543	59.202	63.3951	64.1137	63.543	62.4314	61.9658	63.2493
74.28	54.7278	56.1926	62.2714	64.2037	63.811	64.3452	63.8075	64.7194			74.28	52.3626	54.6516	60.4035	62.9906	62.9013	62.7519	62.1387	63.3061			74.28	52.9322	59.1752	63.3793	64.068	63.5058	62.3922	61.9268	63.1764
74.38	54.6967	56.1706	62.2472	64.1782	63.7843	64.2973	63.771	64.7024			74.38	52.3247	54.6302	60.3714	62.9561	62.8819	62.7062	62.0938	63.2797			74.38	52.8842	59.1574	63.3398	64.0452	63.4685	62.389	61.8881	63.1175
74.48	54.6967	56.1382	62.2122	64.1469	63.7309	64.2551	63.7377	64.6591			74.48	52.3071	54.5945	60.3407	62.9296	62.8557	62.6572	62.0602	63.2476			74.48	52.8523	59.1486	63.3003	64.0138	63.4462	62.353	61.868	63.0808
74.58	54.6455	56.1025	62.1889	64.113	63.7041	64.2291	63.7175	64.6297			74.58	52.3071	54.5803	60.3035	62.8905	62.8099	62.6435	62.0299	63.2133			74.58	52.8523	59.122	63.2764	63.9781	63.3942	62.3135	61.8571	63.0411
74.68	54.6527	56.0616	62.1565	64.1088	63.6746	64.1958	63.685	64.5989			74.68	52.2737	54.5448	60.269	62.8525	62.77	62.5979	61.9872	63.1743			74.68	52.8039	59.1043	63.229	63.9425	63.3614	62.3057	61.7948	63.0184
74.78	54.6235	56.0553	62.127	64.0606	63.6442	64.1779	63.6461	64.5773			74.78	52.2604	54.5234	60.237	62.8123	62.7266	62.5809	61.959	63.1457			74.78	52.7719	59.1043	63.2021	63.9396	63.3271	62.2821	61.7592	62.9593
74.88	54.609	56.0354	62.0839	64.0342	63.6221	64.1414	63.6008	64.5333			74.88	52.229	54.5019	60.2243	62.7801	62.7221	62.5522	61.9141	63.1021			74.88	52.724	59.0723	63.1531	63.8996	63.3002	62.2429	61.7296	62.9318
74.98	54.609	56.0145	62.0785	63.9869	63.5825	64.0967	63.5829	64.4877			74.98	52.2068	54.4664	60.2051	62.7548	62.6787	62.5146	61.8917	63.0563			74.98	52.692	59.0421	63.1104	63.8497	63.272	62.2162	61.7125	62.8864
75.08	54.609	55.9925	62.0454	63.9665	63.541	64.0739	63.54	64.4614			75.08	52.1578	54.4451	60.1756	62.7261	62.6329	62.493	61.8502	62.999			75.08	52.6055	59.0457	63.0867	63.8283	63.2378	62.1878	61.6783	62.8413
75.18	54.5889	55.9359	62.0174	63.9267	63.518	64.0447	63.51	64.4383			75.18	52.1624	54.4193	60.1705	62.6974	62.6135	62.4496	61.8019	62.9704			75.18	52.5158	59.0421	63.0312	63.7925	63.2155	62.1407	61.6753	62.7927
75.28	54.5634	55.9348	61.9924	63.8962	63.4857	64.0268	63.497	64.4004			75.28	52.129	54.4166	60.1411	62.6467	62.5667	62.4383	61.7851	62.9416			75.28	52.5158	59.0155	63.0075	63.7568	63.1678	62.1359	61.6396	62.7807
75.38	54.5377	55.9191	61.9529	63.8445	63.4489	63.9855	63.4637	64.3803			75.38	52.129	54.4066	60.1116	62.6307	62.5301	62.3927	61.7333	62.9038			75.38	52.4838	58.9978	63.0045	63.7212	63.1217	62.1015	61.6195	62.7547
75.48	54.5358	55.8782	61.9421	63.8081	63.412	63.9522	63.45	64.3364			75.48	52.1333	54.3953	60.0772	62.6169	62.4787	62.3778	61.7154	62.873			75.48	52.4358	58.9765	62.968	63.7026	63.0935	62.0496	61.5666	62.6923
75.58	54.5157	55.8573	61.8999	63.787	63.401	63.9245	63.4054	64.3054			75.58	52.1068	54.3953	60.0451	62.5882	62.4616	62.3527	61.6895	62.8271			75.58	52.4038	58.9746	62.9285	63.6711	63.0592	62.0071	61.5153	62.6505
75.68	54.4867	55.8436	61.8766	63.781	63.366	63.8937	63.3738	64.2714			75.68	52.1068	54.3738	60.0131	62.5593	62.4217	62.3243	61.6446	62.7697			75.68	52.3879	58.927	62.8888	63.6498	63.0221	62.0101	61.5107	62.595
75.78	54.4682	55.8059	61.8505	63.7463	63.329	63.8693	63.3559	64.239			75.78	52.1068	54.3453	59.994	62.5306	62.401	62.3141	61.6166	62.7411			75.78	52.3879	58.8968	62.8257	63.6313	62.9847	61.952	61.461	62.555
75.88	54.439	55.7996	61.8227	63.7192	63.3097	63.8368	63.3081	64.2066			75.88	52.0621	54.324	59.9722	62.4881	62.3759	62.2729	61.5695	62.7204			75.88	52.3559	58.8824	62.786	63.5783	62.9402	61.9128	61.3988	62.5325
75.98	54.4299	55.8038	61.794	63.6912	63.2812	63.784	63.266	64.1865			75.98	52.0467	54.2885	59.9427	62.4558	62.3474	62.2182	61.5345	62.6953			75.98	52.3075	58.8559	62.7592	63.5427	62.9207	61.886	61.3723	62.5134
76.08	54.4409	55.765	61.7869	63.6667	63.2369	63.7556	63.2311	64.1433			76.08	52.0177	54.2885	59.9108	62.4271	62.3189	62.1966	61.5133	62.6494			76.08	52.2821	58.8027	62.7386	63.5284	62.888	61.8263	61.3368	62.489
76.18	54.3771	55.7545	61.7465	63.6362	63.2139	63.7231	63.2166	64.1162			76.18	52.0177	54.267	59.8788	62.4294	62.2914	62.1613	61.4706	62.638			76.18	52.2436	58.7371	62.6991	63.4857	62.8508	61.787	61.2978	62.4683
76.28	54.3934	55.7232	61.7187	63.6057	63.154	63.6907	63.1866	64.0853			76.28	52.0222	54.2527	59.857	62.3696	62.2698	62.1475	61.4671	62.5921			76.28	52.1956	58.7405	62.6594	63.4714	62.8137	61.787	61.2932	62.3988
76.38	54.3497	55.7158	61.6684	63.5777	63.131	63.6525	63.1363	64.0753			76.38	51.9955	54.2143	59.8366	62.3409	62.2446	62.1111	61.4257	62.567			76.38	52.2214	58.7228	62.6436	63.4356	62.7765	61.7399	61.259	62.3554
76.48	54.3406	55.6844	61.6387	63.5769	63.1153	63.6273	63.1135	64.0166			76.48	51.9687	54.2072	59.843	62.3385	62.2012	62.0677	61.4144	62.5177			76.48	52.2276	58.6785	62.6041	63.4142	62.7392	61.743	61.2077	62.3259
76.58	54.3331	55.6592	61.6128	63.5329	63.0839	63.6005	63.0909	63.9996			76.58	51.9889	54.1888	59.8148	62.2857	62.191	62.0392	61.3999	62.4832			76.58	52.1698	58.6731	62.5804	63.3614	62.702	61.7084	61.1658	62.2859
76.68	54.3076	55.6289	61.5679	63.5278	63.0554	63.5575	63.0528	63.9578			76.68	51.902	54.153	59.752	62.2685	62.1647	62.0279	61.3583	62.4546			76.68	52.1636	58.6343	62.541	63.3	62.6574	61.6691	61.127	62.2635
76.78	54.2838	55.5869	61.5445	63.4931	63.048	63.5241	63.0025	63.9309			76.78	51.873	54.1488	59.7214	62.2432	62.1362	62.013	61.3133	62.4122			76.78	52.0772	58.6343	62.4934	63.3029	62.6052	61.6299	61.1161	62.2652
76.88	54.2765	55.5503	61.5042	63.4609	63.0194	63.5104	62.9774	63.8884			76.88	51.873	54.1417	59.6805	62.2109	62.0904	61.9708	61.2853	62.363			76.88	52.1059	58.5897	62.4776	63.2828	62.5829	61.5842	61.0385	62.2166
76.98	54.2583	55.5481	61.4871	63.4287	62.9771	63.4746	62.9312	63.8521			76.98	51.8396	54.1175	59.6484	62.1799	62.071	61.9514	61.2741	62.3206			76.98	52.0292	58.5632	62.4144	63.2501	62.5458	61.5434	61.0137	62.1975
77.08	54.2108	55.5398	61.444	63.4084	62.9559	63.4332	62.8988	63.8166			77.08	51.8932	54.1148	59.5909	62.1626	62.0584	61.9251	61.2291	62.3332			77.08	52.0259	58.5455	62.3747	63.2386	62.5085	61.5042	61.0027	62.2026
77.18	54.2017	55.5241	61.4288	63.3762	62.9402	63.404	62.8583	63.7996			77.18	51.8619	54.1175	59.5869	62.1696	62.0161	61.908	61.1843	62.2942			77.18	52.0034	58.533	62.3352	63.2072	62.4713	61.4915	60.9825	62.1524
77.28	54.1851	55.5083	61.3938	63.3509	62.9053	63.3641	62.8177	63.7686			77.28	51.8619	54.0991	59.5563	62.1454	61.9786	61.8625	61.1562	62.2541			77.28	51.9554	58.51	62.2957	63.1715	62.4342	61.4412	60.9421	62.1124
77.38	54.1395	55.4863	61.3741	63.3296	62.8775	63.3292	62.7512	63.7192			77.38	51.8197	54.0562	59.5204	62.0994	61.9625	61.8339	61.1393	62.2346			77.38	51.9296	58.4832	62.2797	63.1359	62.4193	61.4019	60.9173	62.0951
77.48	54.1285	55.4591	61.3409	63.3059	62.8453	63.2781	62.718	63.6892			77.48	51.8174	54.0506	59.4693	62.0592	61.9191	61.7884	61.0753	62.191			77.48	51.9009	58.4923	62.2402	63.1001	62.3999	61.3627	60.9017	62.0724
77.58	54.1194	55.4381	61.339	63.2754	62.8084	63.2529	62.6718	63.6659			77.58	51.7952	54.032	59.4372	62.042	61.902	61.7872	61.0382	62.1624			77.58	51.8755	58.4478	62.1692	63.076	62.3538	61.3281	60.8739	62.0655
77.68	54.1084	55.434	61.2943	63.2467	62.7891	63.2212	62.6394	63.642			77.68	51.7952	53.9965	59.4181	62.0269	61.8735	61.7485	61.0102	62.1165			77.68	51.9075	58.4213	62.1534	63.0431	62.3151	61.3154	60.8242	62.0255
77.78	54.092	55.4151	61.2798	63.2212	62.7651	63.1912	62.5892	63.6019			77.78	51.7286	54.0249	59.3861	61.9925	61.845	61.7199	60.9956	62.0627			77.78	51.8595	58.3504	62.1327	62.9745	62.2956	61.2997	60.8007	61.9995
77.88	54.0757	55.4004	61.2566	63.1941	62.7329	63.1831	62.5437	63.5756			77.88	51.7328	54.0136	59.367	61.9476	61.83	61.6801	60.9708	62.0408			77.88	51.821	58.3504	62.0979	62.936	62.2629	61.2794	60.7807	61.9389
77.98	54.0647	55.3595	61.2395	63.1814	62.697	63.1425	62.5259	63.5393			77.98	51.7573	53.9965	59.3196	61.9039	61.7878	61.6515	60.9519	62.0398			77.98	51.7792	58.3325	62.0821	62.9117	62.2406	61.2448	60.7387	61.9129
78.08	54.0574	55.3438	61.2035	63.167	62.6573	63.1221	62.4733	63.5154			78.08	51.7286	53.9864	59.2901	61.8982	61.742	61.6059	60.926	62.002			78.08	51.7792	58.3272	62.0535	62.8788	62.2212	61.2054	60.7123	61.9007
78.18	54.028	55.3197	61.1731	63.1179	62.6334	63.0775	62.4408	63.4714			78.18	51.7061	53.9396	59.2734	61.858	61.7227	61.5638	60.8945	61.9539			78.18	51.7792	58.2882	62.0187	62.8432	62.1886	61.1551	60.6813	61.8607
78.28	53.9789	55.3114	61.1434	63.0925	62.6048	63.0734	62.4002	63.4505			78.28	51.6727	53.9396	59.2389	61.8291	61.6964	61.5318	60.8833	61.9103			78.28	51.7218	58.2439	62.0029	62.8075	62.1335	61.1191	60.6377	61.812
78.38	53.9789	55.2778	61.1138	63.0628	62.5578	63.0369	62.3581	63.4188			78.38	51.6505	53.9011	59.2351	61.797	61.6507	61.4863	60.8586	61.8839			78.38	51.6673	58.2403	61.9555	62.7889	62.1246	61.0986	60.599	61.774
78.48	53.9751	55.2411	61.0834	63.0417	62.5505	63.0166	62.3054	63.3825			78.48	51.6773	53.9139	59.2069	61.7579	61.6015	61.4668	60.8137	61.8622			78.48	51.6673	58.1905	61.916	62.7575	62.0918	61.064	60.56	61.7565
78.58	53.9094	55.2065	61.0599	63.0053	62.5072	62.9817	62.2656	63.354			78.58	51.6505	53.8825	59.1788	61.7395	61.5708	61.4235	60.7856	61.821			78.58	51.6673	58.1728	61.8764	62.7147	62.0545	61.0247	60.5554	61.7514
78.68	53.9057	55.1971	61.0403	62.9739	62.4721	62.9557	62.2438	63.3323			78.68	51.6505	53.8683	59.1429	61.6969	61.5559	61.395	60.7575	61.8072			78.68	51.6353	58.1463	61.8496	62.6577	62.0322	60.9964	60.5057	61.7271
78.78	53.8564	55.1751	61.0116	62.9282	62.4693	62.9167	62.2105	63.3053			78.78	51.595	53.8328	59.1237	61.6544	61.5137	61.3494	60.7295	61.7786			78.78	51.6353	58.102	61.829	62.6548	61.995	60.9618	60.4948	61.7131
78.88	53.8363	55.1625	60.9945	62.9036	62.4149	62.8793	62.179	63.2744			78.88	51.595	53.8328	59.0918	61.636	61.4942	61.3346	60.6845	61.7384			78.88	51.6353	58.102	61.7895	62.5961	61.9579	60.9117	60.4592	61.6958
78.98	53.8419	55.129	60.9846	62.8698	62.3956	62.8582	62.1531	63.2435			78.98	51.5616	53.7899	59.0598	61.5935	61.4508	61.2809	60.6565	61.6926			78.98	51.5873	58.0575	61.7498	62.5619	61.9205	60.899	60.4389	61.6316
79.08	53.8143	55.107	60.9262	62.8325	62.3661	62.8298	62.1004	63.2002			79.08	51.5571	53.7715	58.9984	61.5509	61.4223	61.2525	60.6285	61.6502			79.08	51.5873	58.0309	61.7261	62.529	61.8611	60.836	60.4202	61.5916
79.18	53.7907	55.0965	60.9208	62.7809	62.3182	62.8071	62.0785	63.1671			79.18	51.5394	53.7615	58.9702	61.5498	61.3938	61.224	60.5835	61.6146			79.18	51.539	57.9866	61.6866	62.5106	61.8416	60.8	60.3814	61.5692
79.28	53.7743	55.064	60.8805	62.758	62.2805	62.786	62.0557	63.1238			79.28	51.5326	53.7402	58.9267	61.5244	61.3516	61.2091	60.5554	61.5895			79.28	51.5873	57.9635	61.6708	62.4934	61.8432	60.7811	60.3194	61.5274
79.38	53.7561	55.0525	60.8544	62.7182	62.274	62.7478	62.0153	63.0999			79.38	51.5215	53.6875	58.8934	61.4647	61.331	61.184	60.5274	61.5607			79.38	51.5488	57.9512	61.6692	62.4578	61.806	60.7183	60.3162	61.505
79.48	53.7322	55.0179	60.8339	62.6945	62.2325	62.7161	61.9949	63.0551			79.48	51.4947	53.659	58.8615	61.4325	61.2852	61.1499	60.4992	61.5321			79.48	51.539	57.9246	61.655	62.4006	61.7643	60.668	60.2804	61.4614
79.58	53.7212	55.0001	60.8204	62.6632	62.1984	62.7039	61.9747	63.0288			79.58	51.4614	53.6219	58.8384	61.4152	61.2704	61.1475	60.4577	61.515			79.58	51.491	57.8801	61.639	62.3821	61.7123	60.6191	60.2417	61.4181
79.68	53.7231	54.9824	60.7863	62.6454	62.1634	62.6714	61.952	62.991			79.68	51.4281	53.6049	58.8038	61.3749	61.2453	61.1042	60.4094	61.4771			79.68	51.4816	57.8536	61.6153	62.3721	61.6854	60.5894	60.2091	61.3694
79.78	53.6555	54.9687	60.763	62.6141	62.1514	62.6309	61.9122	62.9578			79.78	51.4058	53.5692	58.7847	61.3312	61.2168	61.0586	60.3814	61.4381			79.78	51.475	57.8358	61.5884	62.3364	61.6854	60.5594	60.1484	61.3312
79.88	53.6226	54.9477	60.7414	62.5827	62.1063	62.5927	61.8847	62.94			79.88	51.4235	53.5508	58.7629	61.3003	61.162	61.013	60.3534	61.4119			79.88	51.475	57.7916	61.5522	62.2949	61.6527	60.5218	60.1097	61.2879
79.98	53.599	54.9058	60.71	62.5522	62.0915	62.5553	61.862	62.9114			79.98	51.4281	53.5336	58.7463	61.2714	61.1482	60.9845	60.3084	61.3545			79.98	51.4271	57.7827	61.5285	62.2893	61.6498	60.4431	60.06	61.2446
80.08	53.6043	54.8901	60.6823	62.5378	62.0344	62.5195	61.8466	62.869			80.08	51.3947	53.5094	58.7041	61.2635	61.1025	60.956	60.2803	61.3545			80.08	51.4271	57.7382	61.4888	62.2579	61.6155	60.4165	60.0242	61.215
80.18	53.5515	54.8356	60.6534	62.4929	61.9975	62.5065	61.8191	62.825			80.18	51.3947	53.4766	58.6695	61.2255	61.0569	60.9298	60.2522	61.3145			80.18	51.3885	57.7205	61.4493	62.2365	61.5782	60.3614	60.0041	61.175
80.28	53.5496	54.8293	60.6256	62.4641	61.9653	62.4652	61.7883	62.7832			80.28	51.3947	53.4553	58.6849	61.1818	61.0454	60.9047	60.2241	61.2972			80.28	51.4172	57.6939	61.4098	62.2007	61.541	60.352	59.9854	61.1699
80.38	53.5569	54.8156	60.6023	62.4548	61.9496	62.4253	61.768	62.7501			80.38	51.3725	53.4368	58.6503	61.1393	61.026	60.8762	60.1793	61.2686			80.38	51.4271	57.6885	61.3859	62.165	61.5039	60.3174	59.9466	61.1317
80.48	53.5732	54.8252	60.5825	62.4235	61.898	62.3791	61.7355	62.7276			80.48	51.3725	53.4126	58.6376	61.1082	60.9997	60.8568	60.1511	61.2399			80.48	51.3406	57.6762	61.4066	62.1294	61.4591	60.2781	59.9264	61.1022
80.58	53.5314	54.7853	60.5476	62.3964	61.8805	62.3482	61.7032	62.6859			80.58	51.3657	53.3884	58.603	61.0587	60.9655	60.8305	60.1231	61.2112			80.58	51.3311	57.6496	61.3701	62.0936	61.4547	60.2498	59.8922	61.0797
80.68	53.4638	54.759	60.5216	62.3557	61.8409	62.3101	61.6926	62.662			80.68	51.3457	53.3699	58.5696	61.0552	60.9506	60.7793	60.0782	61.1826			80.68	51.3311	57.6726	61.299	62.0722	61.4219	60.2154	59.8812	61.0433
80.78	53.4654	54.7486	60.5036	62.3218	61.8123	62.2816	61.6424	62.6241			80.78	51.2834	53.3342	58.539	61.0162	60.9118	60.7565	60.0501	61.1745			80.78	51.2988	57.6496	61.3069	62.0579	61.3848	60.1886	59.8456	61.0448
80.88	53.4673	54.7172	60.4417	62.288	61.7654	62.2419	61.6099	62.6041			80.88	51.2834	53.3129	58.5031	60.9897	60.8855	60.7393	60.0186	61.1333			80.88	51.2988	57.591	61.2674	62.0009	61.3252	60.1759	59.8067	61.0015
80.98	53.4545	54.6993	60.4408	62.2651	61.7331	62.2223	61.5759	62.5639			80.98	51.25	53.2987	58.4993	60.9748	60.8649	60.7268	59.9805	61.1024			80.98	51.2988	57.5431	61.2626	61.9867	61.285	60.1524	59.7492	60.9582
81.08	53.44	54.6669	60.4192	62.2389	61.6889	62.172	61.5605	62.5392			81.08	51.25	53.2773	58.4903	60.93	60.8399	60.6995	59.9738	61.0452			81.08	51.2508	57.5431	61.2278	61.9295	61.2509	60.0975	59.7399	60.9529
81.18	53.3906	54.6512	60.3914	62.1965	61.6446	62.133	61.5095	62.5075			81.18	51.25	53.2445	58.4685	60.9035	60.8284	60.6596	59.9378	61.0164			81.18	51.2828	57.5254	61.212	61.9253	61.2135	60.0769	59.7059	60.8887
81.28	53.3888	54.6344	60.3565	62.1592	61.6105	62.0811	61.494	62.4712			81.28	51.2432	53.2303	58.4584	60.8724	60.8091	60.6424	59.921	60.9706			81.28	51.2508	57.4989	61.1834	61.8938	61.1764	60.058	59.7089	60.8853
81.38	53.3668	54.5998	60.3269	62.127	61.5736	62.0477	61.4462	62.4442			81.38	51.2278	53.2132	58.4199	60.8403	60.7942	60.6231	59.876	60.9385			81.38	51.2508	57.4989	61.1662	61.8796	61.1392	60.0472	59.6747	60.8453
81.48	53.3249	54.5778	60.3151	62.0906	61.5506	61.9852	61.413	62.4133			81.48	51.2278	53.1919	58.4225	60.8115	60.7656	60.5798	59.8368	60.9133			81.48	51.2028	57.4721	61.1407	61.8438	61.1019	60.0109	59.6639	60.802
81.58	53.303	54.5809	60.2847	62.0517	61.5073	61.9633	61.383	62.3786			81.58	51.1945	53.1776	58.3943	60.7943	60.737	60.5512	59.7918	60.8732			81.58	51.2028	57.4332	61.1012	61.8224	61.0424	59.9669	59.5862	60.7845
81.68	53.2992	54.5432	60.2461	62.0297	61.488	61.9137	61.3505	62.3476			81.68	51.1455	53.1563	58.3624	60.7563	60.6914	60.5364	59.7559	60.8273			81.68	51.1709	57.4278	61.1044	61.7725	61.0379	59.9323	59.5768	60.7585
81.78	53.281	54.5138	60.2254	61.983	61.4355	61.8821	61.3303	62.3229			81.78	51.1566	53.1421	58.3432	60.708	60.6629	60.5113	59.7301	60.8159			81.78	51.1229	57.3835	61.0696	61.7625	61.0053	59.893	59.5271	60.7533
81.88	53.2426	54.5149	60.2146	61.9433	61.4106	61.8423	61.2897	62.3006			81.88	51.1432	53.1206	58.3023	60.6884	60.6456	60.4657	59.702	60.7838			81.88	51.1709	57.371	61.0222	61.7296	60.9679	59.8963	59.5039	60.7291
81.98	53.2482	54.4951	60.1859	61.9102	61.382	61.8171	61.2589	62.2704			81.98	51.1387	53.085	58.2625	60.6621	60.6081	60.4372	59.6739	60.7471			81.98	51.2094	57.3569	60.9825	61.7082	60.9308	59.8538	59.4651	60.7151
82.08	53.2482	54.4678	60.1411	61.8815	61.3452	61.7781	61.2378	62.2573			82.08	51.1164	53.0708	58.2228	60.6195	60.6	60.3917	59.6459	60.7013			82.08	51.1869	57.3301	60.9667	61.6725	60.9085	59.8506	59.4029	60.6718
82.18	53.27	54.4625	60.1106	61.8475	61.2936	61.7375	61.1925	62.2164			82.18	51.1164	53.0395	58.1896	60.5873	60.5851	60.3631	59.6177	60.6554			82.18	51.1389	57.3036	60.943	61.6369	60.8713	59.8144	59.3764	60.6665
82.28	53.2153	54.4635	60.089	61.8137	61.276	61.6969	61.1632	62.2032			82.28	51.0831	53.0211	58.1704	60.5412	60.5464	60.3346	59.5897	60.6096			82.28	51.1389	57.3161	60.9161	61.6011	60.8237	59.8176	59.3174	60.6545
82.38	53.1989	54.4343	60.0531	61.7798	61.2429	61.6741	61.1276	62.1693			82.38	51.1099	53.0238	58.1385	60.5033	60.5108	60.3061	59.5335	60.581			82.38	51.0909	57.2681	60.8797	61.5655	60.8117	59.783	59.2973	60.5814
82.48	53.1807	54.4185	60.0307	61.7502	61.2143	61.6327	61.0919	62.1477			82.48	51.0942	52.9924	58.1064	60.4631	60.4892	60.2605	59.519	60.5409			82.48	51.0204	57.2627	60.8402	61.5611	60.7746	59.7359	59.2864	60.5538
82.58	53.1606	54.3819	59.9948	61.7358	61.1857	61.6067	61.0741	62.1114			82.58	51.0521	52.9569	58.0771	60.432	60.4515	60.241	59.4774	60.4985			82.58	51.0106	57.2504	60.8195	61.5083	60.7149	59.7484	59.2476	60.5258
82.68	53.1386	54.3557	59.9482	61.6969	61.1387	61.5353	61.0368	62.0905			82.68	51.0498	52.9427	58.0168	60.4124	60.3967	60.2149	59.4325	60.4721			82.68	50.9626	57.2025	60.8007	61.4726	60.6957	59.7311	59.2088	60.5067
82.78	53.104	54.3294	59.9338	61.674	61.1074	61.5158	61.0182	62.0782			82.78	51.0318	52.907	57.9785	60.3861	60.3579	60.1863	59.3797	60.432			82.78	50.9307	57.1794	60.761	61.437	60.6629	59.6965	59.1699	60.4894
82.88	53.0563	54.2928	59.9077	61.6494	61.0788	61.4711	60.9922	62.0504			82.88	50.994	52.8856	57.9811	60.34	60.3316	60.1579	59.3426	60.3689			82.88	50.9147	57.1351	60.7089	61.4012	60.6256	59.6808	59.1202	60.4583
82.98	53.0236	54.3	59.8853	61.6291	61.0576	61.4337	60.9687	62.0132			82.98	50.9985	52.8643	57.9529	60.309	60.2573	60.1294	59.3123	60.338			82.98	50.9147	57.1085	60.6788	61.3656	60.5884	59.6337	59.0846	60.4201
83.08	53.0418	54.2771	59.8548	61.5867	61.0134	61.4142	60.9193	62.0079			83.08	51.0053	52.8501	57.9337	60.2767	60.2402	60.1008	59.2698	60.3197			83.08	50.8827	57.0819	60.6614	61.3299	60.5513	59.5945	59.0518	60.4201
83.18	53.0198	54.2697	59.8467	61.5639	60.9821	61.3956	60.9006	61.96			83.18	50.9717	52.8116	57.9247	60.2215	60.2003	60.086	59.2551	60.2715			83.18	50.8442	57.064	60.6077	61.2756	60.5036	59.5786	59.0301	60.4028
83.28	52.9852	54.2634	59.8208	61.53	60.9609	61.3566	60.8642	61.9368			83.28	50.994	52.7888	57.8952	60.2043	60.1797	60.0439	59.2023	60.2258			83.28	50.7864	57.034	60.5743	61.2914	60.4739	59.5583	58.9913	60.3732
83.38	52.9651	54.2383	59.7813	61.4808	60.9287	61.3315	60.8472	61.9222			83.38	50.9717	52.7575	57.8787	60.1744	60.1294	60.0154	59.1742	60.1592			83.38	50.8348	57.0109	60.5111	61.2585	60.4322	59.5551	58.9526	60.3505
83.48	52.9686	54.1933	59.7767	61.4674	60.8881	61.3055	60.8123	61.8866			83.48	50.9116	52.7362	57.8351	60.1446	60.1112	59.9697	59.1461	60.1146			83.48	50.8028	56.9931	60.4842	61.2371	60.4276	59.5096	58.9136	60.3141
83.58	52.9321	54.2057	59.7328	61.4326	60.8632	61.2697	60.7913	61.8611			83.58	50.9051	52.7148	57.812	60.1331	60.086	59.9162	59.1282	60.0653			83.58	50.7544	56.9666	60.4684	61.2157	60.38	59.445	58.8748	60.3159
83.68	52.901	54.1785	59.705	61.4063	60.8318	61.2567	60.7775	61.8434			83.68	50.8783	52.6891	57.7673	60.087	60.0404	59.8671	59.1046	60.0539			83.68	50.7544	56.9489	60.4574	61.1799	60.3682	59.4058	58.8361	60.2723
83.78	52.8828	54.167	59.6987	61.3733	60.784	61.2201	60.762	61.8047			83.78	50.8649	52.6649	57.7354	60.0722	59.9982	59.8352	59.0586	60.008			83.78	50.7065	56.9221	60.421	61.1443	60.3577	59.3853	58.8096	60.217
83.88	52.8372	54.1397	59.6763	61.3488	60.7443	61.1909	60.7272	61.7901			83.88	50.8273	52.6507	57.7162	60.0433	59.9754	59.7965	59.0339	59.9886			83.88	50.713	56.9293	60.3973	61.1086	60.3354	59.3271	58.7738	60.203
83.98	52.8099	54.1147	59.6358	61.3013	60.7259	61.1649	60.6971	61.7762			83.98	50.8273	52.6151	57.7072	60.0008	59.9455	59.761	59.0059	59.945			83.98	50.6487	56.9044	60.4099	61.1086	60.3101	59.2879	58.7273	60.177
84.08	52.8061	54.1	59.6134	61.2835	60.702	61.1543	60.6793	61.7337			84.08	50.8273	52.6051	57.6969	59.9582	59.9204	59.7496	58.9609	59.9587			84.08	50.636	56.8866	60.3609	61.073	60.3206	59.236	58.6883	60.1544
84.18	52.7823	54.0768	59.5847	61.2548	60.6762	61.1227	60.6583	61.7028			84.18	50.8273	52.5938	57.6649	59.9434	59.909	59.7418	58.9081	59.9507			84.18	50.6425	56.8387	60.3339	61.0244	60.276	59.2062	58.6496	60.1337
84.28	52.8042	54.0465	59.5596	61.2277	60.6384	61.1016	60.6129	61.682			84.28	50.8273	52.5725	57.6163	59.9147	59.8634	59.7132	58.8766	59.9163			84.28	50.5946	56.8299	60.3181	60.9873	60.2491	59.17	58.6108	60.0902
84.38	52.7823	54.0204	59.5362	61.1955	60.6172	61.0837	60.5837	61.6557			84.38	50.7937	52.5725	57.5881	59.8652	59.8268	59.6676	58.8463	59.9048			84.38	50.6105	56.7926	60.3181	60.9686	60.2417	59.1308	58.5905	60.0782
84.48	52.7514	54.0182	59.504	61.1362	60.5831	61.0578	60.561	61.6279			84.48	50.7937	52.5581	57.5562	59.8261	59.7651	59.6482	58.798	59.8762			84.48	50.5626	56.7713	60.2912	60.9588	60.2238	59.0915	58.5378	60.0591
84.58	52.7367	54.0088	59.477	61.1176	60.5398	61.0309	60.5432	61.5908			84.58	50.7872	52.4983	57.5179	59.8077	59.7675	59.6049	58.7835	59.8682			84.58	50.6007	56.7624	60.2738	60.9116	60.1866	59.0678	58.5362	60.0208
84.68	52.7222	54.0099	59.4563	61.0727	60.5113	61.0107	60.51	61.5468			84.68	50.7937	52.4728	57.5049	59.7651	59.7262	59.5764	58.7588	59.8418			84.68	50.5786	56.7447	60.2549	60.9087	60.1493	59.071	58.4788	60.0348
84.78	52.6911	53.9553	59.4223	61.0558	60.4707	60.966	60.4913	61.5345			84.78	50.7715	52.4585	57.473	59.7536	59.7115	59.5684	58.7553	59.8269			84.78	50.5302	56.7182	60.2547	60.906	60.1241	59.0364	58.4555	60.0208
84.88	52.6453	53.9376	59.3962	61.0125	60.4403	60.9473	60.4654	61.4944			84.88	50.7715	52.4585	57.4692	59.6996	59.6863	59.5421	58.7194	59.7731			84.88	50.5626	56.6739	60.2153	60.8616	60.0719	59.0129	58.4166	59.9982
84.98	52.6235	53.9229	59.3514	60.999	60.4006	60.927	60.4248	61.4596			84.98	50.7382	52.4542	57.441	59.6903	59.6578	59.5045	58.6746	59.7444			84.98	50.4822	56.6739	60.163	60.8473	60.0676	58.9972	58.401	59.9948
85.08	52.5997	53.903	59.3298	60.9609	60.3694	60.8978	60.4054	61.4286			85.08	50.7561	52.4441	57.4129	59.6616	59.6156	59.4852	58.6465	59.6986			85.08	50.4822	56.6473	60.1363	60.8159	60.0302	58.9939	58.3623	59.9375
85.18	52.5723	53.9092	59.3155	60.9219	60.338	60.8758	60.3835	61.4071			85.18	50.7382	52.4343	57.377	59.6432	59.5665	59.4566	58.605	59.6757			85.18	50.4822	56.6294	60.1442	60.8016	60.011	58.9499	58.3233	59.9115
85.28	52.545	53.9019	59.2922	60.9101	60.3094	60.8426	60.3543	61.3692			85.28	50.7114	52.4228	57.3578	59.6041	59.5516	59.4544	58.5567	59.6412			85.28	50.4343	56.6064	60.1203	60.7773	59.9782	58.9499	58.2955	59.8733
85.38	52.5667	53.8873	59.2616	60.8754	60.2679	60.832	60.3365	61.3538			85.38	50.6826	52.4228	57.3411	59.5754	59.5093	59.4281	58.5285	59.5955			85.38	50.4343	56.6117	60.0808	60.7274	59.9588	58.9107	58.2613	59.8438
85.48	52.5503	53.8579	59.223	60.8499	60.2532	60.7979	60.317	61.3313			85.48	50.6826	52.3843	57.3131	59.5329	59.4922	59.3997	58.5117	59.592			85.48	50.4023	56.5851	60.0808	60.6803	59.9037	58.906	58.238	59.8213
85.58	52.523	53.8558	59.1952	60.8084	60.208	60.7808	60.3033	61.2989			85.58	50.6758	52.3659	57.2722	59.5121	59.4635	59.354	58.4837	59.5416			85.58	50.3798	56.5408	60.0381	60.6447	59.8814	58.895	58.2116	59.7829
85.68	52.512	53.8359	59.1809	60.7915	60.173	60.7605	60.2725	61.2596			85.68	50.6826	52.3446	57.2555	59.4925	59.435	59.3369	58.4555	59.506			85.68	50.3478	56.5231	59.9937	60.6304	59.8786	58.8557	58.1603	59.7762
85.78	52.4755	53.8107	59.145	60.7466	60.1352	60.7272	60.2587	61.2278			85.78	50.6604	52.3231	57.2132	59.4662	59.4236	59.2971	58.4578	59.4786			85.78	50.3064	56.4786	59.97	60.6088	59.8412	58.8322	58.1557	59.7796
85.88	52.4809	53.795	59.1145	60.7237	60.127	60.6971	60.2311	61.1924			85.88	50.6091	52.2976	57.2171	59.4201	59.378	59.2685	58.4275	59.435			85.88	50.258	56.452	59.9305	60.5732	59.822	58.7928	58.1495	59.7345
85.98	52.4592	53.7752	59.0867	60.7077	60.091	60.6695	60.2019	61.1669			85.98	50.6046	52.2733	57.1914	59.3914	59.3608	59.2343	58.3995	59.4007			85.98	50.258	56.4343	59.9147	60.5548	59.7846	58.7473	58.1012	59.7085
86.08	52.4699	53.7604	59.0643	60.6619	60.0533	60.646	60.1679	61.1483			86.08	50.5712	52.2591	57.1493	59.3627	59.3209	59.2308	58.3714	59.3719			86.08	50.258	56.4077	59.8911	60.5376	59.7623	58.7221	58.0438	59.6858
86.18	52.4409	53.729	59.0302	60.6322	60.032	60.6281	60.1403	61.1182			86.18	50.5445	52.2234	57.1148	59.3477	59.2751	59.2058	58.3545	59.3342			86.18	50.2101	56.3812	59.8514	60.5019	59.7431	58.7252	58.005	59.6303
86.28	52.4316	53.7123	59.0076	60.59	60.0008	60.5932	60.116	61.1004			86.28	50.5089	52.205	57.0827	59.3224	59.2466	59.1772	58.3264	59.2952			86.28	50.1781	56.39	59.8277	60.4661	59.7475	58.7065	57.9662	59.6216
86.38	52.4353	53.6955	58.9808	60.556	59.9629	60.555	60.1022	61.0556			86.38	50.5157	52.1922	57.0738	59.2913	59.2181	59.1374	58.2984	59.2688			86.38	50.1781	56.3455	59.8119	60.4519	59.7103	58.7065	57.9428	59.6043
86.48	52.408	53.6567	58.9511	60.5366	59.9353	60.542	60.056	61.041			86.48	50.5	52.1352	57.0443	59.2648	59.1587	59.1203	58.2961	59.2483			86.48	50.1043	56.3455	59.7882	60.4276	59.6909	58.6513	57.9227	59.5436
86.58	52.4023	53.6315	58.9341	60.512	59.8976	60.5112	60.0325	61.0001			86.58	50.5046	52.1621	57.0124	59.2189	59.1403	59.0917	58.2725	59.223			86.58	50.0916	56.3367	59.7724	60.3949	59.6507	58.623	57.8652	59.5227
86.68	52.3897	53.6169	58.891	60.4697	59.8735	60.4973	60.0114	60.9629			86.68	50.4824	52.1168	56.9931	59.1902	59.1153	59.0746	58.2513	59.1714			86.68	50.0982	56.3137	59.7327	60.3377	59.5956	58.5727	57.8263	59.4827
86.78	52.3897	53.5886	58.8821	60.4561	59.868	60.4697	59.9725	60.946			86.78	50.4488	52.1168	56.9611	59.1728	59.0981	59.0462	58.2254	59.1347			86.78	50.0982	56.3012	59.728	60.302	59.6166	58.5491	57.7845	59.4654
86.88	52.3624	53.5645	58.8389	60.4223	59.8285	60.4381	59.9336	60.9228			86.88	50.4755	52.0952	56.9138	59.1441	59.0696	59.0291	58.1974	59.0878			86.88	50.0502	56.2533	59.7501	60.2662	59.5764	58.5383	57.7533	59.4481
86.98	52.313	53.5529	58.8174	60.3934	59.8155	60.4178	59.906	60.8842			86.98	50.4599	52.081	56.8779	59.1465	59.0297	59.0005	58.1692	59.0659			86.98	50.0502	56.2249	59.728	60.2448	59.5615	58.5256	57.7177	59.4221
87.08	52.2892	53.5362	58.7771	60.3698	59.775	60.3755	59.8874	60.8634			87.08	50.4599	52.0597	56.8651	59.104	59.024	58.972	58.1547	59.0225			87.08	50.0178	56.1648	59.7139	60.2092	59.5242	58.4785	57.6943	59.3925
87.18	52.2892	53.51	58.7626	60.3359	59.7307	60.3446	59.8501	60.8255			87.18	50.4265	52.0739	56.8766	59.0751	58.9976	58.9436	58.1243	58.9961			87.18	49.9699	56.1629	59.6886	60.1736	59.4871	58.4204	57.6555	59.3388
87.28	52.2782	53.4828	58.7537	60.3248	59.705	60.3188	59.8234	60.8039			87.28	50.4001	52.081	56.8242	59.0464	58.9725	58.8979	58.0962	58.9685			87.28	49.9699	56.1203	59.6695	60.1436	59.4648	58.3998	57.6352	59.2919
87.38	52.2801	53.4702	58.7268	60.3045	59.6718	60.2911	59.8039	60.7854			87.38	50.3664	52.0426	56.8012	59.0292	58.944	58.8557	58.0681	58.9331			87.38	49.9379	56.0973	59.63	60.1235	59.4766	58.3606	57.6012	59.2866
87.48	52.2455	53.4335	58.6945	60.2656	59.645	60.27	59.7707	60.7537			87.48	50.3377	52.017	56.7691	58.9716	58.9291	58.8375	58.0569	58.9366			87.48	49.9859	56.044	59.5903	60.1021	59.4425	58.3166	57.5857	59.2483
87.58	52.2436	53.4177	58.6621	60.2402	59.6266	60.2513	59.7529	60.7135			87.58	50.3377	52.0198	56.7372	58.9429	58.9039	58.8432	58.0457	58.9078			87.58	49.9379	56.0262	59.5667	60.0665	59.42	58.3055	57.5235	59.205
87.68	52.2471	53.3916	58.6263	60.2097	59.5943	60.2221	59.7253	60.6872			87.68	50.3044	51.9913	56.7282	58.9142	58.8617	58.8045	57.9874	58.8907			87.68	49.8899	55.9997	59.5272	60.0307	59.3933	58.2663	57.4847	59.1581
87.78	52.2034	53.3759	58.602	60.175	59.5658	60.1993	59.6897	60.6564			87.78	50.3044	51.9742	56.718	58.8682	58.8298	58.7384	57.9559	58.8621			87.78	49.8899	55.9765	59.5114	60.0093	59.3531	58.227	57.4614	59.127
87.88	52.1851	53.3497	58.5608	60.1538	59.5344	60.1693	59.6799	60.6317			87.88	50.2819	51.9671	56.6989	58.8486	58.7955	58.7098	57.9391	58.8449			87.88	49.842	55.9554	59.4717	59.9707	59.3158	58.1797	57.4225	59.0993
87.98	52.1559	53.3234	58.5473	60.1131	59.5003	60.1384	59.6523	60.6092			87.98	50.2485	51.9316	56.6822	58.8222	58.767	58.6813	57.9223	58.8471			87.98	49.858	55.9109	59.4243	59.9408	59.3083	58.1405	57.396	59.0748
88.08	52.1468	53.3005	58.5168	60.0886	59.494	60.093	59.6264	60.576			88.08	50.2152	51.9173	56.654	58.7934	58.7385	58.6699	57.8941	58.8219			88.08	49.858	55.8453	59.4085	59.8879	59.2712	58.161	57.3372	59.0228
88.18	52.1028	53.2659	58.4782	60.0666	59.4534	60.0645	59.6013	60.5537			88.18	50.2198	51.9073	56.6348	58.79	58.7098	58.6072	57.8661	58.7909			88.18	49.81	55.8346	59.3848	59.8452	59.234	58.1405	57.3449	58.9933
88.28	52.0975	53.247	58.4665	60.0233	59.4405	60.0344	59.5859	60.5251			88.28	50.2086	51.8718	56.6221	58.7589	58.695	58.5764	57.838	58.7761			88.28	49.81	55.8098	59.3579	59.8423	59.2192	58.1043	57.3014	58.9533
88.38	52.0865	53.1988	58.4333	60.0115	59.4045	60.0027	59.5405	60.498			88.38	50.1884	51.8532	56.5901	58.7071	58.6481	58.5444	57.8267	58.7611			88.38	49.81	55.801	59.285	59.8096	59.1998	58.0745	57.2827	58.8891
88.48	52.0883	53.2102	58.4182	59.9734	59.3916	59.9898	59.4943	60.471			88.48	50.1597	51.849	56.5708	58.6612	58.6355	58.533	57.793	58.7359			88.48	49.7616	55.769	59.2787	59.7995	59.2043	58.0148	57.2439	58.8613
88.58	52.0755	53.1788	58.3768	59.9396	59.3575	59.9573	59.4603	60.4595			88.58	50.193	51.8176	56.5388	58.6325	58.6298	58.5319	57.765	58.6935			88.58	49.7297	55.746	59.2582	59.7666	59.1493	57.9755	57.2207	58.8493
88.68	52.0608	53.1381	58.3419	59.9175	59.3419	59.9175	59.4237	60.4316			88.68	50.1374	51.7821	56.5069	58.6025	58.5899	58.4761	57.7368	58.673			88.68	49.6817	55.7335	59.206	59.748	59.1224	57.9786	57.1817	58.8058
88.78	52.0827	53.1128	58.305	59.8828	59.3105	59.8981	59.3921	60.3985			88.78	50.1038	51.7606	56.4877	58.5842	58.5614	58.4475	57.7391	58.6442			88.78	49.7588	55.7247	59.1633	59.7195	59.0776	57.9204	57.1429	58.7798
88.88	52.0481	53.0982	58.3078	59.8591	59.2958	59.8696	59.3491	60.3783			88.88	50.0639	51.725	56.4838	58.5289	58.5328	58.4191	57.6976	58.6249			88.88	49.7457	55.7122	59.1633	59.6809	59.0405	57.8812	57.1165	58.7051
88.98	52.0299	53.0678	58.2853	59.832	59.2746	59.8274	59.3313	60.359			88.98	50.044	51.6993	56.4596	58.483	58.518	58.3906	57.6696	58.6099			88.98	49.6592	55.6981	59.1238	59.6453	59.0256	57.8182	57.0964	58.6636
89.08	52.0334	53.051	58.2494	59.8192	59.2303	59.8144	59.3143	60.332			89.08	49.9927	51.6922	56.4519	58.4715	58.4929	58.3449	57.628	58.5813			89.08	49.6497	55.6538	59.0841	59.631	58.9885	57.779	57.0575	58.6236
89.18	52.0406	53.0353	58.2207	59.7854	59.1945	59.7624	59.2754	60.3011			89.18	49.997	51.6824	56.4083	58.4117	58.4758	58.3051	57.6078	58.5468			89.18	49.6018	55.627	59.0209	59.621	58.9511	57.7744	57.0187	58.5594
89.28	52.0243	53.0144	58.1911	59.7532	59.1871	59.7494	59.2526	60.2818			89.28	49.9705	51.6466	56.3878	58.368	58.4392	58.2765	57.5931	58.532			89.28	49.6018	55.6093	58.9972	59.5996	58.9288	57.7444	56.9799	58.5107
89.38	52.0117	53.0112	58.1758	59.7346	59.1474	59.7015	59.2227	60.2626			89.38	49.9483	51.6084	56.4019	58.353	58.4129	58.2572	57.5629	58.5068			89.38	49.5698	55.5828	59.0003	59.5809	58.8917	57.7241	56.9751	58.4881
89.48	52.0371	53.0144	58.1452	59.6974	59.1189	59.6666	59.1927	60.2525			89.48	49.9147	51.5684	56.3854	58.3277	58.3844	58.2217	57.5214	58.509			89.48	49.5219	55.5385	58.9466	59.5453	58.8768	57.6846	56.9409	58.4239
89.58	51.9932	52.9881	58.1346	59.677	59.106	59.6463	59.162	60.2208			89.58	49.9192	51.5684	56.338	58.2553	58.3557	58.2001	57.4899	58.493			89.58	49.5219	55.5385	58.918	59.5097	58.8395	57.6581	56.9022	58.4065
89.68	51.9878	52.9493	58.1112	59.671	59.0756	59.6138	59.1197	60.1891			89.68	49.8591	51.5327	56.3405	58.2414	58.3386	58.1568	57.4652	58.4667			89.68	49.4895	55.494	58.8786	59.4954	58.8023	57.6297	56.8867	58.3372
89.78	51.9768	52.9358	58.0672	59.6397	59.0498	59.595	59.0881	60.152			89.78	49.8258	51.53	56.283	58.1989	58.3101	58.1283	57.4416	58.4323			89.78	49.4895	55.4887	58.8737	59.4525	58.7621	57.614	56.8479	58.2677
89.88	51.9658	52.9169	58.0628	59.6202	59.0166	59.5472	59.0752	60.1196			89.88	49.817	51.4972	56.2701	58.1668	58.2553	58.1134	57.4034	58.4037			89.88	49.528	55.4763	58.82	59.4382	58.7204	57.551	56.8089	58.207
89.98	51.9422	52.8813	58.0439	59.5813	58.9724	59.4936	59.0484	60.0941			89.98	49.7925	51.4332	56.2509	58.138	58.2245	58.0713	57.3719	58.3922			89.98	49.5378	55.4497	58.7836	59.4026	58.6833	57.5353	56.8012	58.1637
90.08	51.9422	52.8624	58.0071	59.5677	58.9641	59.4635	59.0192	60.0655			90.08	49.7925	51.4403	56.2381	58.1346	58.1903	58.0428	57.3439	58.3635			90.08	49.5055	55.432	58.7599	59.3812	58.6461	57.5307	56.7624	58.1497
90.18	51.9294	52.852	57.9972	59.5482	58.9429	59.431	58.9844	60.037			90.18	49.7857	51.4188	56.2407	58.0954	58.1753	58.0143	57.3427	58.3258			90.18	49.4575	55.4054	58.6965	59.384	58.6059	57.4961	56.7236	58.0733
90.28	51.9111	52.8027	57.9623	59.5211	58.8987	59.3905	58.9633	60.013			90.28	49.7478	51.4004	56.2253	58.092	58.1673	57.9857	57.3046	58.3085			90.28	49.4575	55.4054	58.6935	59.3498	58.5642	57.4569	56.736	58.0039
90.38	51.869	52.7681	57.9587	59.4949	58.8701	59.3579	58.9341	59.983			90.38	49.7144	51.3732	56.1831	58.0575	58.1559	57.9436	57.2765	58.2948			90.38	49.4095	55.3877	58.6491	59.3098	58.5449	57.4331	56.7002	57.9762
90.48	51.891	52.7461	57.9371	59.4636	58.8405	59.3223	58.9033	59.9498			90.48	49.6922	51.3648	56.1613	58.0552	58.1103	57.9059	57.2653	58.2832			90.48	49.3776	55.3645	58.6094	59.2599	58.4943	57.3939	56.6769	57.912
90.58	51.8964	52.7083	57.9192	59.4255	58.8277	59.284	58.8733	59.9243			90.58	49.6589	51.3335	56.1397	58.0402	58.1022	57.8774	57.2204	58.2408			90.58	49.4095	55.3432	58.5857	59.2383	58.4674	57.3971	56.6411	57.8824
90.68	51.8964	52.6632	57.8779	59.4204	58.7706	59.2646	58.8507	59.9073			90.68	49.6367	51.312	56.1294	58.0115	58.0759	57.8296	57.1922	58.2225			90.68	49.3616	55.3044	58.5495	59.237	58.4259	57.3625	56.6071	57.8475
90.78	51.891	52.6412	57.8787	59.384	58.7503	59.2288	58.819	59.8656			90.78	49.6034	51.2978	56.082	57.9828	58.0737	57.8033	57.153	58.2065			90.78	49.387	55.2723	58.5147	59.2098	58.3931	57.3106	56.5837	57.8164
90.88	51.8782	52.6486	57.8483	59.3433	58.7208	59.2028	58.7793	59.8486			90.88	49.6034	51.2622	56.0398	57.9403	58.0439	57.7748	57.1362	58.1744			90.88	49.3616	55.2687	58.475	59.1884	58.4005	57.2839	56.5604	57.7938
90.98	51.8929	52.6131	57.8114	59.323	58.7097	59.1834	58.7566	59.8246			90.98	49.5364	51.2409	56.0576	57.9195	58.0189	57.7429	57.0912	58.1744			90.98	49.3616	55.2669	58.4513	59.1356	58.3409	57.2289	56.5091	57.7558
91.08	51.8964	52.5722	57.8114	59.2967	58.6812	59.159	58.7193	59.7953			91.08	49.5142	51.2267	56.018	57.9081	57.9846	57.7315	57.0722	58.1286			91.08	49.3616	55.2067	58.4118	59.0956	58.3038	57.1976	56.5061	57.7384
91.18	51.869	52.5449	57.79	59.2545	58.6572	59.137	58.6942	59.7644			91.18	49.4809	51.1939	56.0142	57.893	57.9641	57.7064	57.0464	58.1172			91.18	49.3616	55.1747	58.3723	59.06	58.2843	57.1943	56.4674	57.6898
91.28	51.8417	52.5282	57.745	59.2341	58.6287	59.0997	58.6755	59.7312			91.28	49.4587	51.174	56.0014	57.8677	57.9423	57.6471	57.0014	58.092			91.28	49.2817	55.1747	58.3326	59.0243	58.2338	57.1424	56.4284	57.6291
91.38	51.8307	52.4925	57.7288	59.1909	58.5927	59.064	58.6472	59.7165			91.38	49.4587	51.1654	55.9693	57.8333	57.8989	57.6152	56.9868	58.0541			91.38	49.2333	55.1481	58.2978	58.9772	58.1624	57.1189	56.3864	57.582
91.48	51.8143	52.4873	57.7083	59.1655	58.5661	59.0356	58.6147	59.6663			91.48	49.4763	51.1169	55.9502	57.8046	57.8818	57.5867	56.9621	58.037			91.48	49.2079	55.125	58.2615	58.9529	58.1475	57.0559	56.3431	57.5527
91.58	51.8288	52.4568	57.6733	59.135	58.5209	59.0039	58.5767	59.6462			91.58	49.4587	51.0985	55.9208	57.8068	57.8624	57.5467	56.9341	57.9968			91.58	49.1952	55.1038	58.2458	58.9173	58.1281	56.9978	56.3274	57.5127
91.68	51.7832	52.4276	57.6347	59.1223	58.4822	58.973	58.5612	59.6115			91.68	49.4253	51.077	55.8991	57.7815	57.8498	57.5149	56.8891	57.982			91.68	49.1534	55.0861	58.2251	58.9173	58.0953	56.9539	56.3167	57.4901
91.78	51.7996	52.4243	57.6069	59.085	58.4591	58.9308	58.5183	59.5968			91.78	49.3917	51.0358	55.867	57.7643	57.8248	57.5069	56.8744	57.9396			91.78	49.1792	55.0205	58.2061	58.8957	58.0582	56.9099	56.2809	57.4485
91.88	51.7449	52.3856	57.5925	59.0681	58.4361	58.9153	58.4948	59.5582			91.88	49.3695	51.0201	55.8196	57.7528	57.7961	57.4555	56.8499	57.8822			91.88	49.1374	54.9885	58.1666	58.8601	58.0031	56.8988	56.2421	57.3998
91.98	51.7559	52.3542	57.5584	59.0477	58.4131	58.891	58.4648	59.5204			91.98	49.363	50.9988	55.8158	57.7069	57.7676	57.4271	56.8217	57.8536			91.98	49.1853	54.9919	58.1429	58.8244	57.9942	56.8753	56.2266	57.3965
92.08	51.732	52.3437	57.5386	59.0173	58.3808	58.8788	58.4364	59.4872			92.08	49.3362	50.956	55.7941	57.6608	57.7391	57.3986	56.8049	57.8077			92.08	49.1661	54.9708	58.1032	58.7888	57.9614	56.8203	56.1876	57.3634
92.18	51.7047	52.3133	57.5172	58.9953	58.3605	58.8382	58.4138	59.4555			92.18	49.3362	50.9418	55.7672	57.6493	57.7242	57.3609	56.7769	57.7905			92.18	49.1214	54.9531	58.1032	58.7744	57.9391	56.8155	56.1256	57.3219
92.28	51.6864	52.2861	57.4911	58.9664	58.3319	58.796	58.374	59.4454			92.28	49.314	50.909	55.7326	57.6206	57.6991	57.3393	56.7319	57.7619			92.28	49.1472	54.9263	58.0479	58.7316	57.884	56.7809	56.1441	57.287
92.38	51.6609	52.2745	57.4758	58.9427	58.307	58.783	58.353	59.4068			92.38	49.314	50.882	55.7007	57.586	57.6877	57.3131	56.7127	57.716			92.38	49.1214	54.9476	58.0084	58.696	57.8766	56.7574	56.1101	57.2577
92.48	51.6591	52.2547	57.4444	58.9046	58.2748	58.7448	58.3197	59.3859			92.48	49.2806	50.8707	55.684	57.5573	57.6763	57.296	56.6611	57.6874			92.48	49.1214	54.9229	57.9878	58.6817	57.8572	56.7338	56.0866	57.2437
92.58	51.6114	52.2473	57.4211	58.8682	58.2379	58.7148	58.3018	59.3497			92.58	49.2627	50.855	55.6688	57.555	57.6397	57.2674	56.6196	57.676			92.58	49.0734	54.8997	57.9687	58.6459	57.808	56.6946	56.0479	57.2263
92.68	51.6006	52.241	57.4014	58.8522	58.2011	58.7018	58.2824	59.3142			92.68	49.2026	50.8207	55.6558	57.5112	57.6077	57.2299	56.6005	57.6679			92.68	49.0476	54.882	57.9529	58.6245	57.7798	56.6552	56.0214	57.1741
92.78	51.5896	52.197	57.3745	58.8411	58.1919	58.666	58.2686	59.2817			92.78	49.216	50.8065	55.6558	57.4711	57.5963	57.2081	56.5837	57.6415			92.78	49.0415	54.8554	57.945	58.5889	57.7455	56.6395	55.9858	57.1308
92.88	51.5733	52.1792	57.3628	58.792	58.155	58.6514	58.2475	59.2516			92.88	49.2026	50.7852	55.6047	57.4446	57.5792	57.1819	56.5578	57.6267			92.88	48.9931	54.7932	57.9056	58.5646	57.7412	56.6002	55.9703	57.1135
92.98	51.5129	52.1572	57.3368	58.7886	58.1182	58.6189	58.2119	59.22			92.98	49.1849	50.7653	55.5919	57.4113	57.5507	57.1534	56.541	57.6015			92.98	49.0095	54.7932	57.8898	58.5203	57.7084	56.5608	55.9236	57.0875
93.08	51.502	52.1289	57.3206	58.7565	58.0813	58.5864	58.1746	59.2036			93.08	49.1738	50.7423	55.5598	57.3963	57.5049	57.1249	56.513	57.59			93.08	48.9611	54.7489	57.8661	58.4931	57.6533	56.5451	55.8848	57.0908
93.18	51.5038	52.1162	57.2847	58.7437	58.0491	58.5474	58.1535	59.1798			93.18	49.165	50.7423	55.551	57.3813	57.5049	57.0907	56.4759	57.5533			93.18	48.9132	54.7223	57.8264	58.4604	57.6265	56.498	55.8335	57.0701
93.28	51.458	52.087	57.2712	58.7268	58.0214	58.532	58.1276	59.1712			93.28	49.1294	50.7281	55.5215	57.3215	57.4878	57.0622	56.4455	57.5007			93.28	48.8812	54.7046	57.8027	58.4175	57.5893	56.498	55.8071	57.0926
93.38	51.4454	52.0733	57.2488	58.6929	57.9892	58.5012	58.1008	59.1258			93.38	49.1248	50.7125	55.4896	57.2675	57.4764	57.0337	56.4309	57.4697			93.38	48.8812	54.6992	57.7632	58.3818	57.567	56.4713	55.7683	57.0701
93.48	51.4306	52.0607	57.2336	58.659	57.9459	58.476	58.0895	59.0964			93.48	49.0915	50.6997	55.4575	57.218	57.4478	57.0053	56.4264	57.4376			93.48	48.8812	54.6604	57.7474	58.3462	57.5297	56.4351	55.7296	57.0337
93.58	51.4306	52.043	57.2102	58.6294	57.9421	58.4411	58.0692	59.0655			93.58	49.0915	50.657	55.3936	57.2008	57.4159	56.9631	56.3893	57.4124			93.58	48.8812	54.6424	57.7474	58.3246	57.5104	56.3769	55.7296	57.0266
93.68	51.3977	52.0189	57.1815	58.6039	57.9072	58.4297	58.0513	59.0555			93.68	49.0958	50.647	55.3846	57.2066	57.3908	56.9447	56.3557	57.3838			93.68	48.8812	54.6158	57.7077	58.289	57.5	56.3439	55.6906	57.0233
93.78	51.3813	51.9958	57.1608	58.5548	57.8712	58.4281	58.0173	59.0152			93.78	49.1026	50.6357	55.3449	57.1916	57.353	56.9333	56.3298	57.355			93.78	48.8492	54.6036	57.6682	58.2534	57.4554	56.2906	55.6705	56.9833
93.88	51.3357	51.979	57.1232	58.5472	57.8574	58.4029	57.9801	58.996			93.88	49.0869	50.6	55.3231	57.1468	57.3405	56.8946	56.3165	57.3093			93.88	48.8013	54.5627	57.6445	58.2391	57.4405	56.289	55.6363	56.9573
93.98	51.3247	51.9424	57.0918	58.5092	57.8168	58.3599	57.9501	58.9844			93.98	49.0314	50.5858	55.3066	57.1169	57.3165	56.857	56.2883	57.2898			93.98	48.8652	54.5591	57.605	58.2177	57.4032	56.2308	55.5975	56.9137
94.08	51.3119	51.9141	57.0855	58.4828	57.7956	58.3363	57.9265	58.9457			94.08	49.0246	50.5473	55.2784	57.1031	57.2707	56.8285	56.2603	57.268			94.08	48.8812	54.5361	57.589	58.2104	57.3437	56.1884	55.5586	56.914
94.18	51.3119	51.8753	57.0514	58.4557	57.7698	58.3152	57.9087	58.9358			94.18	49.0023	50.5289	55.2593	57.0835	57.2468	56.7999	56.2154	57.2497			94.18	48.8332	54.5184	57.5417	58.1706	57.3289	56.1633	55.5198	56.8704
94.28	51.2791	51.8743	57.0424	58.4304	57.7366	58.2916	57.8861	58.8902			94.28	48.969	50.5074	55.2119	57.0687	57.2343	56.7715	56.2041	57.2152			94.28	48.8332	54.4953	57.5022	58.132	57.3095	56.1711	55.4966	56.8671
94.38	51.281	51.8375	56.9975	58.4092	57.7146	58.247	57.8519	58.867			94.38	48.9736	50.4932	55.2208	57.0226	57.2159	56.743	56.1896	57.189			94.38	48.7853	54.4528	57.4864	58.1077	57.2767	56.157	55.4576	56.8653
94.48	51.2663	51.8312	56.9617	58.3813	57.6943	58.2218	57.8342	58.8408			94.48	48.9801	50.4505	55.1926	56.9824	57.2137	56.7054	56.1548	57.1626			94.48	48.7594	54.4031	57.4625	58.0962	57.2544	56.1365	55.4188	56.8271
94.58	51.2663	51.8166	56.9392	58.3457	57.6482	58.1917	57.8009	58.8037			94.58	48.9468	50.4292	55.144	56.9421	57.1852	56.6746	56.139	57.1236			94.58	48.7209	54.3765	57.404	58.0635	57.2172	56.113	55.3956	56.8357
94.68	51.2389	51.7988	56.9052	58.3211	57.6114	58.1788	57.7896	58.7681			94.68	48.9311	50.4035	55.1312	56.8984	57.1658	56.6665	56.1009	57.1145			94.68	48.7209	54.3586	57.3961	58.0392	57.1801	56.0894	55.3723	56.8184
94.78	51.2207	51.7757	56.8809	58.3025	57.5883	58.1601	57.7717	58.7642			94.78	48.9135	50.4177	55.1171	56.8673	57.1737	56.6483	56.0694	57.0973			94.78	48.7209	54.332	57.3756	58.0036	57.1576	56.0784	55.3691	56.7751
94.88	51.206	51.782	56.8593	58.2889	57.5607	58.1276	57.7417	58.7403			94.88	48.8913	50.3836	55.0966	56.8386	57.1452	56.6004	56.0076	57.0686			94.88	48.7209	54.3143	57.3359	57.9678	57.1205	56.0297	55.3256	56.8218
94.98	51.217	51.7443	56.8423	58.2567	57.5588	58.1024	57.7207	58.7241			94.98	48.8576	50.365	55.0378	56.8099	57.1109	56.581	56.0233	57.0571			94.98	48.6889	54.2877	57.3122	57.9365	57.0833	55.9872	55.2868	56.7838
95.08	51.1657	51.7149	56.8019	58.2415	57.5321	58.0675	57.6931	58.6986			95.08	48.8354	50.3437	55.0263	56.7753	57.096	56.5582	56.002	57.0113			95.08	48.7148	54.2434	57.2964	57.925	57.046	56.0077	55.248	56.7402
95.18	51.1657	51.7003	56.7786	58.2025	57.5036	58.0464	57.668	58.6678			95.18	48.8354	50.3295	54.9969	56.7638	57.0709	56.54	55.9829	57.0135			95.18	48.6475	54.2434	57.257	57.8894	57.0208	55.9778	55.251	56.7282
95.28	51.1475	51.6835	56.7661	58.1721	57.4934	58.0325	57.6161	58.6368			95.28	48.8021	50.3081	54.9802	56.7466	57.0595	56.5206	55.9571	56.9883			95.28	48.673	54.2166	57.2333	57.8894	57.0162	55.9558	55.2168	56.6882
95.38	51.1019	51.672	56.7329	58.1399	57.4437	58.0131	57.5966	58.6191			95.38	48.8289	50.3038	54.9649	56.7316	57.0253	56.4943	55.9212	56.9459			95.38	48.7467	54.2166	57.2173	57.8535	56.9791	55.9321	55.1936	56.6918
95.48	51.1164	51.6468	56.7122	58.1272	57.4289	57.9741	57.5634	58.5928			95.48	48.8132	50.2768	54.9328	56.7156	57.0104	56.4978	55.9066	56.9104			95.48	48.6955	54.1901	57.2094	57.8066	56.9642	55.9085	55.1548	56.6536
95.58	51.1054	51.6185	56.6898	58.1052	57.3994	57.9586	57.5448	58.5689			95.58	48.8132	50.2369	54.9304	56.6891	56.9852	56.4694	55.8953	56.8852			95.58	48.6668	54.1458	57.1889	57.7936	56.9419	55.8929	55.116	56.6276
95.68	51.0563	51.628	56.6529	58.0705	57.3625	57.914	57.531	58.5519			95.68	48.7466	50.2269	54.8855	56.6627	56.983	56.4408	55.8505	56.8704			95.68	48.673	54.1458	57.1699	57.7752	56.9269	55.8693	55.0896	56.6016
95.78	51.0781	51.6122	56.6386	58.0594	57.3561	57.8904	57.5034	58.521			95.78	48.7466	50.1942	54.8586	56.6374	56.9567	56.3929	55.8391	56.8394			95.78	48.673	54.1138	57.1541	57.7393	56.9077	55.8112	55.057	56.5718
95.88	51.0344	51.6028	56.6162	58.0341	57.3432	57.8799	57.4685	58.4824			95.88	48.7466	50.1543	54.8535	56.6202	56.9053	56.3609	55.8077	56.7821			95.88	48.625	54.0836	57.1114	57.7037	56.8897	55.7955	55.0273	56.5356
95.98	51.0287	51.5819	56.5938	58.0179	57.2934	57.8572	57.4572	58.46			95.98	48.7243	50.1301	54.8036	56.5834	56.886	56.3462	55.7719	56.7535			95.98	48.625	54.057	57.067	57.6681	56.8526	55.7828	55.0073	56.5094
96.08	51.0105	51.5546	56.5695	57.9857	57.2667	57.8312	57.4328	58.4221			96.08	48.691	50.0945	54.7921	56.543	56.862	56.3303	55.7269	56.742			96.08	48.5992	54.0127	57.067	57.6851	56.8153	55.7671	55.046	56.5234
96.18	50.996	51.542	56.5444	57.9646	57.2446	57.8084	57.4256	58.399			96.18	48.7354	50.0945	54.7602	56.5017	56.8482	56.304	55.6989	56.7247			96.18	48.593	53.995	57.0275	57.6538	56.8004	55.7279	55.015	56.4852
96.28	50.9888	51.5106	56.5326	57.935	57.193	57.7752	57.3907	58.365			96.28	48.7021	50.0561	54.7408	56.4879	56.8197	56.2755	55.6707	56.6961			96.28	48.5865	53.9684	57.0117	57.601	56.7752	55.7074	54.9683	56.4243
96.38	50.9649	51.498	56.4923	57.9197	57.1727	57.7516	57.3762	58.3589			96.38	48.6753	50.0546	54.7089	56.4649	56.7911	56.2469	55.6427	56.6882			96.38	48.593	53.9825	56.9959	57.5752	56.7379	55.6649	54.9295	56.4227
96.48	50.9376	51.4719	56.4752	57.8824	57.1524	57.7313	57.3551	58.3318			96.48	48.6574	50.0276	54.6897	56.4453	56.7545	56.2469	55.5978	56.6618			96.48	48.5451	53.9416	56.9722	57.5396	56.6813	55.6728	54.9482	56.3585
96.58	50.9376	51.4582	56.4457	57.8715	57.1147	57.7158	57.3372	58.3125			96.58	48.6574	50.019	54.6871	56.4212	56.7284	56.2322	55.5696	56.6332			96.58	48.5131	53.9239	56.9753	57.5252	56.6739	55.6492	54.914	56.3585
96.68	50.8955	51.4184	56.4161	57.8393	57.0879	57.6825	57.3121	58.2947			96.68	48.6842	49.9806	54.6385	56.4305	56.6883	56.2071	55.5619	56.6022			96.68	48.5131	53.8974	56.9532	57.5038	56.6546	55.6335	54.8985	56.289
96.78	50.8845	51.4027	56.4116	57.8231	57.0676	57.655	57.2716	58.2738			96.78	48.6574	49.9806	54.6001	56.3982	56.6598	56.1785	55.5472	56.5701			96.78	48.5131	53.8531	56.9279	57.4682	56.6219	55.6257	54.852	56.2594
96.88	50.837	51.4058	56.3613	57.8037	57.0465	57.6201	57.2505	58.2546			96.88	48.6842	49.9833	54.5579	56.3672	56.6278	56.133	55.508	56.5323			96.88	48.5131	53.8797	56.9089	57.4468	56.5847	55.61	54.8363	56.237
96.98	50.859	51.3796	56.338	57.7731	57.029	57.586	57.2206	58.2159			96.98	48.6087	49.9877	54.5427	56.3521	56.6027	56.1045	55.4765	56.5128			96.98	48.4647	53.8531	56.8931	57.4111	56.5459	55.5895	54.8208	56.1934
97.08	50.8242	51.3493	56.3066	57.7495	56.9985	57.5705	57.21	58.1966			97.08	48.6286	49.935	54.5233	56.3096	56.5741	56.0737	55.463	56.4842			97.08	48.4647	53.8565	56.8931	57.411	56.5548	55.5708	54.81	56.1501
97.18	50.7767	51.3241	56.3012	57.7376	56.969	57.5234	57.1768	58.1719			97.18	48.5796	49.9306	54.476	56.3154	56.5456	56.0531	55.4238	56.4647			97.18	48.4807	53.8354	56.8536	57.3753	56.5445	55.544	54.7587	56.1068
97.28	50.7732	51.3241	56.2868	57.7113	56.9267	57.5063	57.1532	58.1364			97.28	48.5574	49.9208	54.4594	56.2866	56.5262	56.0417	55.4091	56.4463			97.28	48.4328	53.8177	56.8297	57.3611	56.5102	55.5078	54.751	56.0668
97.38	50.7676	51.2885	56.2374	57.6825	56.9018	57.4893	57.1451	58.104			97.38	48.5241	49.9235	54.4555	56.2786	56.5136	56.0268	55.3788	56.4268			97.38	48.4328	53.7909	56.806	57.3424	56.4879	55.4842	54.7307	56.0668
97.48	50.755	51.2592	56.2231	57.6614	56.8898	57.4763	57.1192	58.1002			97.48	48.5241	49.9079	54.4082	56.2522	56.4828	56.0019	55.3596	56.3982			97.48	48.4426	53.7732	56.7665	57.3254	56.4506	55.4637	54.6965	56.0286
97.58	50.733	51.2193	56.2016	57.6369	56.8696	57.4333	57.099	58.0615			97.58	48.4307	49.8951	54.389	56.2326	56.4543	55.9562	55.3227	56.3523			97.58	48.4168	53.7252	56.7507	57.3254	56.4357	55.4291	54.6577	56.0166
97.68	50.7421	51.2078	56.1809	57.6047	56.8216	57.4129	57.0665	58.0445			97.68	48.4284	49.8738	54.3443	56.2176	56.3971	55.9278	55.3036	56.3237			97.68	48.4393	53.6935	56.727	57.3112	56.3807	55.4026	54.6345	56.0026
97.78	50.7456	51.2056	56.145	57.5868	56.8069	57.3828	57.0341	58.0267			97.78	48.4039	49.8524	54.3314	56.2004	56.3686	55.9129	55.2777	56.3122			97.78	48.4106	53.6614	56.711	57.2754	56.354	55.382	54.5955	55.9593
97.88	50.7311	51.1806	56.1298	57.5665	56.7848	57.3455	57.0001	57.9896			97.88	48.4238	49.8382	54.3225	56.1717	56.3321	55.8707	55.2497	56.2836			97.88	48.4168	53.6669	56.6748	57.254	56.3346	55.3428	54.5723	55.9333
97.98	50.7274	51.1366	56.1019	57.5437	56.7387	57.3228	56.9814	57.9781			97.98	48.3905	49.8167	54.2739	56.1774	56.3057	55.8707	55.235	56.2663			97.98	48.4168	53.6578	56.6557	57.2326	56.339	55.3271	54.546	55.9157
98.08	50.7311	51.1355	56.075	57.5141	56.7239	57.2976	56.9465	57.958			98.08	48.4216	49.7855	54.2739	56.1337	56.2623	55.8136	55.2215	56.247			98.08	48.3688	53.6172	56.632	57.2112	56.2944	55.3034	54.5335	55.9106
98.18	50.7147	51.104	56.058	57.4963	56.7037	57.2692	56.9246	57.9264			98.18	48.3794	49.777	54.2226	56.1337	56.2372	55.8057	55.1767	56.2206			98.18	48.4168	53.5833	56.5926	57.1754	56.2915	55.2674	54.5132	55.8984
98.28	50.7091	51.0915	56.0077	57.4708	56.6623	57.244	56.8987	57.9102			98.28	48.3794	49.767	54.2252	56.1084	56.203	55.7624	55.1486	56.192			98.28	48.3848	53.587	56.5893	57.1783	56.2572	55.2485	54.4792	55.8984
98.38	50.6507	51.0558	55.9853	57.4234	56.6226	57.2147	56.8857	57.8808			98.38	48.3572	49.7456	54.1664	56.0912	56.1743	55.7224	55.1205	56.137			98.38	48.3368	53.5427	56.5529	57.1683	56.2199	55.1965	54.4402	55.8691
98.48	50.6397	51.039	55.9754	57.4014	56.5977	57.1749	56.8598	57.8391			98.48	48.3236	49.7199	54.1587	56.0831	56.1425	55.719	55.1172	56.0922			98.48	48.2889	53.5159	56.5324	57.1612	56.1827	55.1541	54.417	55.8497
98.58	50.6579	51.0024	55.9476	57.3777	56.5857	57.1506	56.8517	57.8182			98.58	48.3281	49.6957	54.1266	56.0647	56.1173	55.6655	55.0812	56.0888			98.58	48.2569	53.4982	56.4897	57.1255	56.1456	55.1149	54.3782	55.8255
98.68	50.6635	50.9866	55.9197	57.3557	56.548	57.1092	56.8249	57.782			98.68	48.3014	49.6858	54.1074	56.0372	56.0808	55.637	55.0644	56.0773			98.68	48.2889	53.4682	56.45	57.1226	56.141	55.1195	54.3392	55.7769
98.78	50.678	50.9521	55.9055	57.3337	56.5259	57.0978	56.8111	57.7487			98.78	48.268	49.6631	54.0716	56.0107	56.0544	55.638	55.025	56.0349			98.78	48.279	53.4664	56.3884	57.1041	56.1084	55.0678	54.3315	55.7595
98.88	50.6324	50.9426	55.874	57.3031	56.4982	57.0612	56.7958	57.7202			98.88	48.286	49.6545	54.0627	55.9992	56.0397	55.597	55.0105	56.0086			98.88	48.295	53.445	56.382	57.0828	56.1084	55.044	54.3005	55.7475
98.98	50.6215	50.9112	55.8597	57.2828	56.4899	57.0394	56.7641	57.6846			98.98	48.2347	49.653	54.0332	55.9531	56.0031	55.5572	54.9802	55.9972			98.98	48.2569	53.4273	56.3473	57.0469	56.0637	55.0048	54.2927	55.7335
99.08	50.6544	50.8923	55.8489	57.26	56.4549	57.0134	56.7358	57.673			99.08	48.2014	49.6388	54.009	55.9244	55.9837	55.5309	54.952	55.9684			99.08	48.2729	53.4007	56.3234	57.0499	56.0608	54.9656	54.254	55.7075
99.18	50.6233	50.8631	55.8058	57.2304	56.4208	56.9866	56.718	57.6353			99.18	48.2014	49.6175	53.9949	55.921	55.9403	55.5001	54.933	55.9513			99.18	48.2729	53.4007	56.303	57.0327	56.0265	54.9262	54.2569	55.7109
99.28	50.6271	50.8472	55.7914	57.204	56.3932	56.9557	56.7018	57.6252			99.28	48.1792	49.6031	53.9987	55.8842	55.9368	55.4887	54.8981	55.9112			99.28	48.2245	53.3562	56.2918	57.0184	56.0117	54.9026	54.2275	55.6902
99.38	50.6215	50.8378	55.761	57.1761	56.3618	56.9313	56.692	57.6151			99.38	48.1569	49.5648	53.9859	55.8728	55.9002	55.4739	54.8768	55.8767			99.38	48.2184	53.3244	56.2491	56.9971	55.9922	54.8761	54.2259	55.6467
99.48	50.6051	50.8012	55.7304	57.1558	56.3563	56.8818	56.6612	57.5827			99.48	48.1569	49.5803	53.9348	55.8439	55.8923	55.4603	54.8421	55.8481			99.48	48.2245	53.3422	56.2048	56.9614	55.9372	54.8555	54.1995	55.6207
99.58	50.5995	50.776	55.6963	57.1313	56.3213	56.8607	56.6287	57.5634			99.58	48.1233	49.5504	53.8875	55.8129	55.8774	55.4409	54.8117	55.8367			99.58	48.1766	53.3208	56.1653	56.9728	55.9253	54.8163	54.2027	55.6156
99.68	50.563	50.7749	55.6874	57.1049	56.2816	56.8469	56.6166	57.5217			99.68	48.1501	49.5249	53.8644	55.7899	55.8283	55.4056	54.7837	55.8389			99.68	48.1446	53.2818	56.1574	56.9327	55.8851	54.8242	54.1685	55.6033
99.78	50.5209	50.7457	55.6515	57.0745	56.277	56.8281	56.6182	57.4954			99.78	48.1302	49.5362	53.8618	55.7485	55.8226	55.4009	54.7499	55.8079			99.78	48.1286	53.25	56.1179	56.8971	55.8598	54.7801	54.1607	55.5738
99.88	50.5174	50.7194	55.6219	57.0457	56.2393	56.803	56.5883	57.4514			99.88	48.1279	49.5036	53.826	55.7347	55.7974	55.3748	54.7219	55.7829			99.88	48.1286	53.25	56.0782	56.8828	55.8404	54.7455	54.1343	55.5774
99.98	50.4844	50.6828	55.5949	57.0212	56.2153	56.764	56.5356	57.4453			99.98	48.0678	49.5178	53.7838	55.7151	55.7438	55.3781	54.6939	55.7667			99.98	48.1352	53.1966	56.0624	56.8686	55.8404	54.7063	54.1142	55.5462
100.08	50.4863	50.6556	55.5734	57.0118	56.2006	56.7527	56.5315	57.4151			100.08	48.0857	49.5178	53.7556	55.6714	55.7233	55.3656	54.6657	55.7084			100.08	48.0966	53.1398	56.015	56.8472	55.8032	54.7014	54.0985	55.5167
100.18	50.4681	50.6545	55.551	56.9881	56.1702	56.7178	56.5072	57.3819			100.18	48.1011	49.5205	53.7325	55.6852	55.6947	55.3575	54.6579	55.6762			100.18	48.0966	53.1292	55.9992	56.8114	55.7838	54.6668	54.0939	55.4732
100.28	50.4024	50.6125	55.5294	56.95	56.1462	56.6926	56.4813	57.3626			100.28	48.0678	49.5036	53.7237	55.6599	55.7061	55.3405	54.623	55.6613			100.28	48.0647	53.1169	55.9834	56.7586	55.7333	54.6668	54.083	55.4645
100.38	50.3713	50.599	55.5169	56.9339	56.1177	56.6755	56.4724	57.3355			100.38	48.0678	49.4678	53.6763	55.6405	55.6811	55.312	54.6097	55.6396			100.38	48.0261	53.0901	55.9597	56.7401	55.7244	54.6197	54.0597	55.4212
100.48	50.3748	50.5497	55.4908	56.9017	56.0798	56.652	56.4601	57.3224			100.48	48.0678	49.4323	53.6405	55.6312	55.6228	55.2835	54.5647	55.6074			100.48	47.9687	53.0724	55.9201	56.7186	55.6885	54.5805	54.0209	55.3985
100.58	50.3622	50.5277	55.4603	56.8874	56.0503	56.6251	56.4342	57.3078			100.58	48.0345	49.4438	53.6213	55.6025	55.6204	55.2926	54.5366	55.5788			100.58	48.0167	53.0672	55.947	56.7043	55.6647	54.5411	53.9945	55.3865
100.68	50.3	50.5047	55.4468	56.8594	56.0375	56.5983	56.4261	57.2684			100.68	48.0276	49.3995	53.6238	55.5852	55.5919	55.2663	54.5086	55.5445			100.68	47.9847	53.0458	55.9043	56.6972	55.6321	54.5019	53.9587	55.3534
100.78	50.2799	50.4942	55.4119	56.8382	56.008	56.5667	56.3905	57.256			100.78	48.0122	49.3754	53.5892	55.5703	55.5463	55.2379	54.4973	55.5067			100.78	47.9847	53.0015	55.8885	56.6616	55.6171	54.4862	53.9355	55.3343
100.88	50.2343	50.4784	55.3849	56.8128	55.9914	56.5399	56.3727	57.2352			100.88	48.0122	49.3781	53.5573	55.5278	55.5383	55.2116	54.4524	55.5043			100.88	47.9622	52.9838	55.849	56.6259	55.6022	54.4469	53.9386	55.317
100.98	50.2287	50.4522	55.3778	56.7848	55.9739	56.5139	56.3693	57.195			100.98	48.0122	49.3825	53.5278	55.5127	55.472	55.198	54.4244	55.4872			100.98	47.9204	52.9573	55.8378	56.6115	55.5919	54.4075	53.9277	55.2736
101.08	50.2195	50.4176	55.3374	56.7722	55.9546	56.4806	56.3313	57.1749			101.08	47.9789	49.3468	53.478	55.4991	55.4457	55.1809	54.4074	55.4448			101.08	47.8884	52.9393	55.8014	56.5901	55.5577	54.4029	53.8812	55.2596
101.18	50.1704	50.3978	55.3122	56.7306	55.9251	56.4684	56.3086	57.1641			101.18	47.9564	49.3255	53.4767	55.453	55.432	55.1637	54.3794	55.4436			101.18	47.8884	52.9128	55.7777	56.5545	55.5205	54.3683	53.8657	55.2336
101.28	50.1174	50.381	55.2988	56.7137	55.9021	56.4287	56.2981	57.137			101.28	47.9564	49.3112	53.4293	55.4104	55.4035	55.1388	54.3514	55.4047			101.28	47.8724	52.895	55.7619	56.5073	55.498	54.3526	53.8579	55.1868
101.38	50.1155	50.3632	55.271	56.679	55.879	56.4099	56.2745	57.107			101.38	47.9009	49.287	53.3972	55.392	55.3579	55.1011	54.3042	55.3702			101.38	47.8724	52.8419	55.7224	56.4688	55.4788	54.329	53.8315	55.1608
101.48	50.0881	50.3213	55.2449	56.6536	55.8514	56.3759	56.2559	57.0807			101.48	47.9188	49.2515	53.3781	55.384	55.3292	55.1033	54.2592	55.3553			101.48	47.8085	52.8028	55.6985	56.4474	55.4609	54.3023	53.8376	55.1312
101.58	50.0825	50.3055	55.2404	56.6189	55.8265	56.3401	56.2267	57.0467			101.58	47.8564	49.25	53.3563	55.338	55.3007	55.0782	54.2278	55.3576			101.58	47.8085	52.7885	55.6827	56.4118	55.446	54.2661	53.8034	55.1175
101.68	50.0589	50.3035	55.2145	56.5969	55.7979	56.3124	56.2056	57.0297			101.68	47.8832	49.2329	53.3461	55.3265	55.2722	55.0668	54.1997	55.3267			101.68	47.7605	52.7974	55.64	56.3759	55.4089	54.2425	53.7647	55.0652
101.78	50.0753	50.3055	55.183	56.5774	55.7822	56.2987	56.1626	56.9903			101.78	47.8564	49.2186	53.2924	55.3185	55.2264	55.0384	54.1717	55.3152			101.78	47.7285	52.7708	55.588	56.3403	55.3864	54.1954	53.7414	55.0739
101.88	50.0297	50.2867	55.1615	56.552	55.7592	56.2613	56.149	56.9749			101.88	47.8342	49.1787	53.2437	55.292	55.1979	55.0349	54.157	55.3119			101.88	47.7285	52.7	55.5722	56.316	55.3715	54.2111	53.7257	55.0306
101.98	50.0187	50.2793	55.1292	56.5215	55.7528	56.2378	56.1141	56.947			101.98	47.8342	49.1731	53.231	55.2633	55.1785	54.9962	54.1323	55.2557			101.98	47.6802	52.7088	55.5515	56.2762	55.3492	54.1798	53.7024	55.0079
102.08	50.0058	50.2636	55.1203	56.4994	55.726	56.2191	56.0873	56.9239			102.08	47.7741	49.1618	53.1989	55.2346	55.1808	54.9779	54.0908	55.2407			102.08	47.6322	52.6823	55.5325	56.229	55.3464	54.156	53.6792	54.9873
102.18	49.9712	50.2353	55.0862	56.469	55.7039	56.1948	56.0663	56.8838			102.18	47.7451	49.1574	53.1797	55.231	55.1351	54.9505	54.0707	55.2214			102.18	47.6322	52.6521	55.5167	56.2118	55.3269	54.1403	53.6217	54.9613
102.28	49.9694	50.2238	55.0547	56.4359	55.6809	56.1639	56.0402	56.8606			102.28	47.7718	49.1091	53.1605	55.1885	55.0895	54.9436	54.056	55.2064			102.28	47.6003	52.6289	55.493	56.1762	55.3075	54.1246	53.6356	54.8968
102.38	49.9182	50.2144	55.0188	56.3961	55.656	56.1379	56.0087	56.822			102.38	47.7228	49.0506	53.1081	55.1598	55.0745	54.9073	54.0481	55.1686			102.38	47.6068	52.6112	55.4772	56.1662	55.2867	54.1011	53.6201	54.9126
102.48	49.9091	50.1766	54.9802	56.3699	55.621	56.1079	55.9762	56.8003			102.48	47.7228	49.0449	53.0709	55.1311	55.0357	54.873	54.0224	55.1628			102.48	47.5203	52.6112	55.4772	56.1333	55.2808	54.0619	53.5907	54.8535
102.58	49.9018	50.1829	54.9722	56.3512	55.5823	56.0745	55.956	56.7726			102.58	47.7408	49.0008	53.0621	55.1311	55.0038	54.8536	54.0032	55.1204			102.58	47.5584	52.5846	55.4375	56.1077	55.2749	54.046	53.5627	54.8257
102.68	49.8782	50.1536	54.9381	56.3183	55.5676	56.0526	55.9219	56.7525			102.68	47.7228	48.9881	53.0326	55.1022	54.958	54.8445	53.9583	55.109			102.68	47.4883	52.588	55.4503	56.0834	55.2376	54.0224	53.5472	54.784
102.78	49.8415	50.1557	54.9156	56.2768	55.5473	56.0388	55.9009	56.7193			102.78	47.6895	48.9552	53.0198	55.0735	54.9295	54.8161	53.9393	55.0631			102.78	47.4883	52.5456	55.4138	56.0477	55.2153	53.9832	53.5597	54.7391
102.88	49.8562	50.1306	54.8967	56.264	55.5353	56.0161	55.883	56.6915			102.88	47.6895	48.9295	53.0005	55.0448	54.8918	54.7704	53.9044	55.038			102.88	47.456	52.4906	55.3901	56.0119	55.19	53.9675	53.5426	54.7147
102.98	49.8543	50.0928	54.8689	56.2606	55.515	55.9999	55.8628	56.6628			102.98	47.6895	48.884	52.9686	55.0102	54.8439	54.7441	53.8831	55.0059			102.98	47.3699	52.4906	55.3269	56.0077	55.1707	53.9486	53.5239	54.7009
103.08	49.8597	50.0729	54.8376	56.2284	55.4947	55.9771	55.8303	56.6366			103.08	47.6895	48.8698	52.9494	54.9815	54.8154	54.7306	53.8348	54.9771			103.08	47.3601	52.4781	55.3506	55.9763	55.1454	53.9361	53.5006	54.6922
103.18	49.8179	50.0771	54.8232	56.1971	55.4736	55.9592	55.8116	56.6119			103.18	47.6673	48.8512	52.9468	54.9701	54.7696	54.7019	53.8101	54.96			103.18	47.3666	52.4516	55.2872	55.9763	55.1111	53.8967	53.4851	54.6609
103.28	49.8232	50.0677	54.799	56.1684	55.4487	55.9308	55.7801	56.5957			103.28	47.6605	48.8413	52.9366	54.939	54.7468	54.6564	53.8124	54.952			103.28	47.376	52.4338	55.2636	55.9549	55.1111	53.8607	53.4649	54.6227
103.38	49.7921	50.0614	54.781	56.1633	55.4311	55.9162	55.7493	56.571			103.38	47.6895	48.8313	52.9071	54.9125	54.7388	54.6415	53.7753	54.9256			103.38	47.3281	52.4214	55.2478	55.9306	55.0962	53.8307	53.4462	54.6053
103.48	49.7903	50.0311	54.7675	56.1209	55.3953	55.8829	55.7476	56.5347			103.48	47.7072	48.7985	52.8854	54.8781	54.701	54.6119	53.7618	54.9107			103.48	47.3281	52.3896	55.2241	55.8977	55.0768	53.7977	53.4074	54.5793
103.58	49.7959	50.0247	54.7317	56.0989	55.3813	55.874	55.7104	56.5161			103.58	47.6784	48.7772	52.8701	54.8631	54.6839	54.5823	53.7281	54.897			103.58	47.3055	52.3416	55.2083	55.8763	55.0591	53.7742	53.3965	54.562
103.68	49.7685	50.0089	54.7227	56.0608	55.3566	55.8528	55.6844	56.4922			103.68	47.6784	48.7629	52.8598	54.8241	54.6725	54.5538	53.7169	54.8592			103.68	47.2383	52.3789	55.2034	55.8621	55.0217	53.7758	53.3841	54.5185
103.78	49.7412	49.9838	54.6912	56.0531	55.3602	55.8171	55.6706	56.4667			103.78	47.6827	48.7416	52.847	54.778	54.6554	54.5252	53.6586	54.8373			103.78	47.2736	52.3451	55.1686	55.8434	54.9846	53.7428	53.3686	54.4751
103.88	49.7227	49.9891	54.685	56.0252	55.3455	55.8114	55.6471	56.4436			103.88	47.6895	48.723	52.8189	54.7596	54.6154	54.5195	53.6271	54.7995			103.88	47.2322	52.3185	55.1449	55.8122	54.9623	53.7363	53.3219	54.4283
103.98	49.7227	49.9932	54.6401	56.004	55.3003	55.7805	55.6342	56.4227			103.98	47.6895	48.7061	52.7958	54.717	54.5812	54.4911	53.6101	54.7709			103.98	47.2801	52.3008	55.1291	55.7906	54.9651	53.7003	53.2986	54.4005
104.08	49.6954	49.9723	54.6347	55.993	55.2865	55.7489	55.6034	56.3756			104.08	47.6562	48.6917	52.7537	54.6998	54.5698	54.442	53.5933	54.7537			104.08	47.2322	52.2529	55.1054	55.7693	54.9326	53.6876	53.2955	54.3623
104.18	49.7136	49.9451	54.5988	55.9583	55.2505	55.7188	55.579	56.364			104.18	47.6562	48.6561	52.7319	54.6538	54.5275	54.4226	53.5653	54.7423			104.18	47.1998	52.2208	55.0785	55.755	54.9101	53.6798	53.2474	54.3503
104.28	49.6589	49.9409	54.5988	55.9295	55.2293	55.6953	55.5539	56.3362			104.28	47.6516	48.6534	52.7037	54.6343	54.532	54.4055	53.5541	54.7273			104.28	47.1998	52.2031	55.0499	55.7194	54.8908	53.6579	53.2241	54.2894
104.38	49.6315	49.9335	54.5575	55.9151	55.2155	55.6668	55.5312	56.3077			104.38	47.6382	48.6348	52.687	54.6078	54.5069	54.3906	53.5429	54.7251			104.38	47.1518	52.2174	55.0262	55.6978	54.8581	53.6092	53.1947	54.2443
104.48	49.6042	49.9178	54.5405	55.8854	55.1787	55.6587	55.4882	56.2745			104.48	47.634	48.6091	52.6922	54.5675	54.4784	54.3406	53.5261	54.6964			104.48	47.1904	52.1943	55.0058	55.6622	54.8209	53.606	53.1698	54.2374
104.58	49.5583	49.8874	54.518	55.8516	55.1538	55.6327	55.4753	56.2544			104.58	47.6004	48.5993	52.6742	54.5503	54.4499	54.3337	53.5114	54.6425			104.58	47.1678	52.1677	54.9867	55.6265	54.7986	53.5824	53.1557	54.1974
104.68	49.5731	49.8832	54.4902	55.8305	55.1437	55.6092	55.4493	56.2265			104.68	47.5781	48.5777	52.6423	54.5354	54.4212	54.3086	53.4867	54.622			104.68	47.1297	52.15	54.9867	55.6052	54.7733	53.543	53.1434	54.1714
104.78	49.5165	49.8748	54.4669	55.7949	55.1113	55.5702	55.4169	56.1972			104.78	47.5781	48.5635	52.6103	54.5273	54.4041	54.2802	53.4451	54.607			104.78	47.1199	52.15	54.963	55.6123	54.739	53.5195	53.1044	54.1141
104.88	49.5074	49.8528	54.4615	55.7855	55.0865	55.5402	55.378	56.1686			104.88	47.5516	48.5395	52.5591	54.5123	54.3927	54.238	53.4137	54.568			104.88	47.0719	52.15	54.9108	55.5765	54.7019	53.5038	53.0811	54.0672
104.98	49.4873	49.8266	54.4248	55.7474	55.0709	55.5272	55.3408	56.1355			104.98	47.5226	48.5108	52.5437	54.4813	54.3642	54.206	53.38	54.5303			104.98	47.0399	52.1057	54.8918	55.4952	54.6796	53.4456	53.0424	54.0968
105.08	49.4433	49.8288	54.4068	55.7101	55.0405	55.5004	55.3196	56.1169			105.08	47.4893	48.4981	52.5271	54.4779	54.3208	54.2025	53.352	54.5187			105.08	47.0399	52.1091	54.8523	55.4767	54.6422	53.4362	53.0036	54.0586
105.18	49.4615	49.8308	54.3925	55.7034	55.0165	55.4801	55.2905	56.0883			105.18	47.5494	48.4753	52.5181	54.4503	54.3071	54.1776	53.352	54.4982			105.18	46.992	52.1091	54.8444	55.4195	54.6422	53.4016	53.0114	54.0326
105.28	49.4452	49.7994	54.3789	55.6906	55.0156	55.4476	55.2532	56.0613			105.28	47.5226	48.4496	52.4886	54.4088	54.29	54.166	53.307	54.4649			105.28	46.9436	52.0878	54.8128	55.4266	54.6051	53.378	52.9881	54.0066
105.38	49.4269	49.7669	54.344	55.6628	54.9741	55.4192	55.2369	56.0474			105.38	47.5004	48.4454	52.4402	54.3871	54.2786	54.1376	53.2958	54.458			105.38	46.8735	52.0701	54.7921	55.4052	54.5679	53.3247	52.9539	53.977
105.48	49.3886	49.7554	54.3323	55.6323	54.9685	55.3866	55.2175	56.0158			105.48	47.4671	48.4141	52.4439	54.4181	54.2499	54.1034	53.2678	54.4156			105.48	46.8637	52.0435	54.7304	55.3696	54.5306	53.2915	52.9026	53.9162
105.58	49.4087	49.7313	54.317	55.6102	54.9344	55.3623	55.1802	55.9909			105.58	47.4893	48.3927	52.4248	54.3778	54.2328	54.0577	53.2396	54.4213			105.58	46.8542	52.0044	54.7099	55.3338	54.5231	53.3136	52.9026	53.8591
105.68	49.3921	49.7134	54.2892	55.5908	54.9078	55.3558	55.1576	55.9694			105.68	47.4671	48.367	52.4272	54.3398	54.2351	54.0293	53.2251	54.3756			105.68	46.8317	52.0383	54.6623	55.3124	54.5083	53.2996	52.8793	53.8155
105.78	49.3538	49.6873	54.2623	55.562	54.8875	55.3161	55.1251	55.947			105.78	47.4334	48.3428	52.3966	54.3089	54.21	54.0008	53.1857	54.347			105.78	46.9022	51.9992	54.6465	55.2768	54.4711	53.2601	52.8591	53.7982
105.88	49.321	49.6799	54.239	55.55	54.8515	55.2973	55.0846	55.9315			105.88	47.4069	48.3258	52.3607	54.28	54.1929	53.9722	53.1554	54.3217			105.88	46.8637	51.9815	54.6196	55.2625	54.4488	53.246	52.8016	53.7549
105.98	49.3428	49.6716	54.2157	55.5238	54.8257	55.2648	55.0724	55.9222			105.98	47.3779	48.3072	52.3479	54.2547	54.1734	53.9551	53.1532	54.2953			105.98	46.7932	51.9547	54.5992	55.241	54.4235	53.1974	52.7628	53.7115
106.08	49.3411	49.66	54.1906	55.4917	54.8082	55.2299	55.074	55.8975			106.08	47.3446	48.2717	52.3288	54.2053	54.1642	53.9153	53.1184	54.253			106.08	46.7038	51.937	54.5706	55.2053	54.4115	53.1738	52.7348	53.6751
106.18	49.3393	49.6507	54.1842	55.4518	54.7668	55.212	55.0408	55.8721			106.18	47.3266	48.2332	52.3096	54.1881	54.1438	53.8981	53.1049	54.238			106.18	46.7419	51.9281	54.5437	55.1582	54.3744	53.1768	52.7209	53.6333
106.28	49.3063	49.6191	54.1484	55.4315	54.7382	55.1917	55.0213	55.852			106.28	47.34	48.2289	52.2623	54.1594	54.122	53.8696	53.0713	54.2232			106.28	46.7837	51.9016	54.5516	55.1454	54.3401	53.1422	52.6571	53.6073
106.38	49.3245	49.5982	54.1456	55.4053	54.6995	55.1657	55.0051	55.8227			106.38	47.3446	48.2075	52.2737	54.1307	54.0992	53.8412	53.0802	54.1979			106.38	46.7358	51.8839	54.493	55.1125	54.3119	53.1187	52.6153	53.59
106.48	49.3082	49.5941	54.1286	55.3545	54.6931	55.1252	54.959	55.8025			106.48	47.3446	48.1791	52.2482	54.1271	54.0729	53.799	53.0543	54.183			106.48	46.6653	51.8839	54.4805	55.0655	54.2776	53.0795	52.5919	53.5813
106.58	49.2752	49.5658	54.1107	55.3494	54.6627	55.1057	54.9492	55.7833			106.58	47.3446	48.1578	52.2009	54.1133	54.0672	53.767	53.024	54.1406			106.58	46.6554	51.8396	54.4519	55.0526	54.2776	53.0638	52.5686	53.5309
106.68	49.2752	49.5562	54.0936	55.3112	54.6166	55.0821	54.9095	55.7524			106.68	47.3713	48.1435	52.1881	54.0939	54.0387	53.7386	53.006	54.1258			106.68	46.646	51.8396	54.444	55.0312	54.2507	53.0527	52.5298	53.4858
106.78	49.2516	49.5364	54.0479	55.2978	54.5999	55.0439	54.8869	55.7308			106.78	47.3557	48.122	52.1496	54.0535	54.0237	53.7043	52.9848	54.1005			106.78	46.6427	51.8128	54.3904	54.987	54.2107	53.0322	52.4911	53.4425
106.88	49.2076	49.5164	54.0334	55.2647	54.5798	55.0009	54.8673	55.7061			106.88	47.3557	48.0823	52.1368	54.0213	53.9873	53.6644	52.9668	54.081			106.88	46.6075	51.8164	54.3618	54.9599	54.2033	52.993	52.4724	53.4163
106.98	49.2296	49.4882	54.0192	55.2266	54.5723	54.9904	54.8276	55.7006			106.98	47.3557	48.0652	52.0857	54.0213	53.9815	53.636	52.9421	54.0834			106.98	46.6075	51.7951	54.3618	54.9369	54.1659	52.993	52.4288	53.3938
107.08	49.2387	49.4462	53.9957	55.2139	54.5226	54.9725	54.7968	55.6782			107.08	47.3224	48.0622	52.0767	53.9926	53.953	53.5881	52.914	54.0546			107.08	46.5595	51.7774	54.3507	54.8912	54.1288	52.9724	52.362	53.3556
107.18	49.2151	49.4305	53.9573	55.185	54.518	54.9278	54.77	55.6273			107.18	47.2956	48.0296	52.0511	53.9639	53.9245	53.5618	52.8915	54.018			107.18	46.598	51.7508	54.3381	54.8728	54.1467	52.9537	52.3326	53.3296
107.28	49.2114	49.4221	53.9527	55.147	54.4921	54.8978	54.7344	55.6234			107.28	47.289	48.0154	52.028	53.9259	53.8936	53.5332	52.8634	54.0089			107.28	46.5689	51.7242	54.3144	54.8499	54.1362	52.9143	52.2891	53.3123
107.38	49.162	49.397	53.9195	55.1232	54.4525	54.8848	54.7198	55.5971			107.38	47.289	47.9939	51.9961	53.9063	53.8754	53.4991	52.8443	53.963			107.38	46.5275	51.7331	54.2748	54.8298	54.1139	52.8783	52.2161	53.295
107.48	49.1382	49.3792	53.8935	55.1021	54.4387	54.8653	54.689	55.5679			107.48	47.2979	47.9797	51.9512	53.8834	53.8502	53.4706	52.8186	53.9286			107.48	46.5275	51.7065	54.259	54.8199	54.0886	52.872	52.2268	53.2514
107.58	49.1529	49.3509	53.8809	55.0682	54.4212	54.8466	54.659	55.5323			107.58	47.2668	47.9583	51.9217	53.8662	53.8217	53.442	52.7904	53.8931			107.58	46.5177	51.662	54.2195	54.8156	54.0842	52.8751	52.1648	53.2427
107.68	49.1639	49.3258	53.854	55.0369	54.4	54.8141	54.6388	55.513			107.68	47.2668	47.9441	51.8873	53.8201	53.8182	53.4249	52.7624	53.9034			107.68	46.5275	51.6443	54.1798	54.7885	54.0469	52.8232	52.1445	53.2376
107.78	49.1165	49.3121	53.8325	55.0047	54.3678	54.7995	54.612	55.4936			107.78	47.2443	47.9228	51.8744	53.8029	53.7931	53.3965	52.7176	53.877			107.78	46.4956	51.6177	54.1561	54.7485	54.0499	52.7934	52.0716	53.1994
107.88	49.0872	49.2953	53.8118	54.9869	54.3447	54.7638	54.5884	55.4759			107.88	47.2443	47.8544	51.8515	53.7742	53.7646	53.3816	52.7029	53.8484			107.88	46.521	51.5875	54.1593	54.7271	54.0394	52.7572	52.0095	53.2168
107.98	49.0926	49.2577	53.7805	54.9733	54.3079	54.741	54.5577	55.4682			107.98	47.2623	47.8302	51.8464	53.7453	53.7439	53.3566	52.6534	53.8312			107.98	46.5275	51.6177	54.1403	54.7085	54.0171	52.7336	51.9706	53.1856
108.08	49.058	49.2461	53.758	54.9311	54.2941	54.7264	54.5358	55.4249			108.08	47.2155	47.816	51.8169	53.7338	53.7337	53.328	52.6221	53.8026			108.08	46.4796	51.5734	54.1403	54.6814	53.98	52.6944	51.9892	53.1785
108.18	49.0197	49.2209	53.7553	54.9132	54.2729	54.6988	54.5115	55.4048			108.18	47.2289	47.7947	51.8041	53.6879	53.7074	53.3109	52.5771	53.7453			108.18	46.4796	51.5734	54.1166	54.6515	53.9426	52.6787	51.9318	53.1648
108.28	49.0197	49.1717	53.7113	54.8862	54.2277	54.6679	54.4944	55.3886			108.28	47.211	47.7633	51.772	53.6592	53.6652	53.2882	52.5794	53.7167			108.28	46.5177	51.5255	54.0771	54.6414	53.9204	52.6393	51.893	53.1126
108.38	49.0414	49.1612	53.6862	54.8649	54.2158	54.6289	54.4702	55.3593			108.38	47.1777	47.7376	51.7504	53.6511	53.6447	53.2539	52.5379	53.6708			108.38	46.4796	51.4758	54.0374	54.6058	53.895	52.6157	51.8727	53.0901
108.48	48.9776	49.1372	53.688	54.8412	54.1955	54.6136	54.4466	55.3161			108.48	47.1777	47.6878	51.7209	53.6533	53.616	53.2231	52.5232	53.6536			108.48	46.4796	51.4581	54.0137	54.5957	53.8981	52.5765	51.8385	53.0519
108.58	48.9886	49.1235	53.6548	54.8125	54.1779	54.5802	54.4198	55.306			108.58	47.1777	47.719	51.6914	53.6074	53.6184	53.2083	52.5097	53.6077			108.58	46.4476	51.4315	53.9979	54.5844	53.8981	52.5922	51.792	53.0346
108.68	48.9921	49.1026	53.6395	54.7905	54.1356	54.5526	54.3875	55.289			108.68	47.1509	47.6878	51.6569	53.6005	53.5875	53.197	52.4985	53.57			108.68	46.4857	51.4227	53.9742	54.5486	53.8609	52.553	51.7888	52.9964
108.78	48.9738	49.0743	53.6189	54.7684	54.1126	54.5396	54.3672	55.2596			108.78	47.111	47.6521	51.6531	53.573	53.5761	53.1799	52.4705	53.5481			108.78	46.5337	51.4049	53.9348	54.5444	53.8236	52.5135	51.7533	52.9615
108.88	48.9411	49.0386	53.6	54.7565	54.0913	54.512	54.3567	55.2334			108.88	47.0888	47.6352	51.6441	53.5556	53.5305	53.1513	52.4401	53.539			108.88	46.4956	51.3604	53.8951	54.5272	53.8192	52.49	51.7143	52.9337
108.98	48.91	49.0166	53.5704	54.721	54.0655	54.4811	54.3064	55.2094			108.98	47.0888	47.6166	51.6058	53.5362	53.5111	53.1091	52.3919	53.5103			108.98	46.4636	51.3339	53.8951	54.4916	53.8013	52.4508	51.66	52.913
109.08	48.91	48.9768	53.5471	54.7023	54.0471	54.4706	54.2861	55.1809			109.08	47.0153	47.5952	51.5738	53.5247	53.4848	53.0908	52.3638	53.4931			109.08	46.4251	51.3339	53.8793	54.4773	53.7641	52.4302	51.6367	52.873
109.18	48.8971	48.9663	53.5157	54.6821	54.013	54.443	54.2845	55.1446			109.18	47.0107	47.5382	51.5521	53.4925	53.4539	53.0771	52.3559	53.4645			109.18	46.4411	51.3162	53.8556	54.4773	53.7418	52.4113	51.5978	52.8522
109.28	48.8953	48.9412	53.4932	54.6532	53.991	54.4113	54.2448	55.1152			109.28	46.9506	47.5497	51.5072	53.5061	53.4356	53.0624	52.3301	53.4152			109.28	46.4476	51.2719	53.8365	54.4245	53.6868	52.3721	51.559	52.8522
109.38	48.8607	48.9202	53.4574	54.6261	53.9531	54.3902	54.1953	55.0998			109.38	46.9706	47.5198	51.5059	53.4636	53.4105	53.0145	52.302	53.3671			109.38	46.3992	51.2719	53.8161	54.3987	53.6896	52.3093	51.5544	52.802
109.48	48.8277	48.9119	53.4439	54.5923	53.943	54.3593	54.1727	55.0805			109.48	46.933	47.4813	51.4585	53.4521	53.382	52.9918	52.3177	53.35			109.48	46.3992	51.2451	53.8112	54.3845	53.6673	52.2936	51.5202	52.7948
109.58	48.7674	48.8877	53.426	54.5702	53.9117	54.3292	54.1621	55.0473			109.58	46.8994	47.484	51.4394	53.4234	53.3671	52.9769	52.2808	53.3476			109.58	46.3419	51.231	53.7764	54.3488	53.6302	52.2777	51.4984	52.7569
109.68	48.7601	48.8437	53.4125	54.5516	53.8914	54.3162	54.141	55.0226			109.68	46.8507	47.4671	51.4317	53.4199	53.3419	52.9518	52.2458	53.3305			109.68	46.3292	51.2008	53.7527	54.3417	53.6479	52.2542	51.4922	52.7602
109.78	48.7639	48.8248	53.3766	54.5177	53.8591	54.3009	54.1078	55.0001			109.78	46.8438	47.4529	51.3819	53.3969	53.2883	52.9324	52.2143	53.3178			109.78	46.3353	51.2097	53.7527	54.3059	53.6153	52.215	51.4503	52.7395
109.88	48.7092	48.7945	53.3783	54.505	53.8581	54.2854	54.0875	54.9778			109.88	46.8105	47.4314	51.3792	53.3694	53.2484	52.9096	52.2066	53.2926			109.88	46.348	51.2097	53.729	54.2703	53.6123	52.1757	51.4222	52.736
109.98	48.7127	48.7756	53.347	54.4855	53.8259	54.2481	54.0664	54.9446			109.98	46.7925	47.4002	51.3498	53.3372	53.2335	52.9005	52.1786	53.2697			109.98	46.3033	51.1831	53.7559	54.2346	53.5929	52.1363	51.4316	52.7133
110.08	48.7183	48.7599	53.33	54.4475	53.7992	54.2197	54.0454	54.9245			110.08	46.7549	47.413	51.3306	53.3199	53.205	52.8719	52.1504	53.2583			110.08	46.2234	51.1654	53.7369	54.2131	53.5706	52.1128	51.396	52.696
110.18	48.7183	48.739	53.3093	54.4398	53.7919	54.2091	54.0171	54.8913			110.18	46.7327	47.3787	51.2987	53.3176	53.19	52.8549	52.1224	53.2273			110.18	46.2234	51.1388	53.7179	54.1774	53.5557	52.0971	51.357	52.6735
110.28	48.6998	48.739	53.2976	54.4033	53.7503	54.1701	53.9854	54.8719			110.28	46.7327	47.3559	51.3011	53.3027	53.165	52.8309	52.0774	53.2124			110.28	46.175	51.1122	53.6974	54.1632	53.5111	52.0735	51.357	52.6664
110.38	48.6998	48.7074	53.2851	54.3882	53.7356	54.1547	53.9724	54.8589			110.38	46.7504	47.3603	51.2667	53.2739	53.1364	52.8207	52.0493	53.1976			110.38	46.2009	51.0943	53.6735	54.1519	53.4963	52.0279	51.3369	52.6267
110.48	48.6451	48.697	53.2537	54.3662	53.7302	54.1279	53.9538	54.8442			110.48	46.6948	47.3275	51.2385	53.259	53.1193	52.7864	52.0213	53.2102			110.48	46.159	51.0677	53.631	54.1133	53.4589	52.0089	51.3182	52.6213
110.58	48.6451	48.6865	53.2286	54.3399	53.6951	54.1092	53.9416	54.8125			110.58	46.6547	47.3103	51.1987	53.2291	53.0908	52.775	51.9875	53.1838			110.58	46.1271	51.05	53.6215	54.1133	53.4589	52.0184	51.3027	52.6267
110.68	48.6196	48.6425	53.2124	54.3102	53.6611	54.0849	53.9254	54.7947			110.68	46.6547	47.3005	51.1655	53.2107	53.0645	52.7442	51.9595	53.1379			110.68	46.0791	50.9969	53.5755	54.0775	53.4397	51.9792	51.2795	52.5831
110.78	48.6177	48.6415	53.206	54.2891	53.637	54.0589	53.9051	54.7755			110.78	46.6325	47.2719	51.145	53.1993	53.0314	52.7295	51.9404	53.1207			110.78	46.0791	50.9792	53.566	54.0205	53.4292	51.984	51.2918	52.5711
110.88	48.5904	48.6288	53.1926	54.2552	53.6224	54.0353	53.8874	54.7561			110.88	46.5812	47.2463	51.1131	53.1498	53.0165	52.7317	51.9259	53.0921			110.88	46.0471	50.9471	53.5709	53.9991	53.4218	51.9478	51.2717	52.5311
110.98	48.5757	48.587	53.1613	54.2442	53.5845	54.0052	53.8784	54.733			110.98	46.5769	47.2321	51.0964	53.1037	52.988	52.7009	51.8977	53.0543			110.98	46.1111	50.9169	53.5265	53.9748	53.3964	51.9084	51.2747	52.5347
111.08	48.5483	48.587	53.1389	54.2358	53.5449	53.9858	53.8541	54.7267			111.08	46.5812	47.2106	51.0657	53.0842	52.948	52.6895	51.8865	53.0519			111.08	46.0791	50.8904	53.4965	53.9419	53.3995	51.8848	51.2562	52.5138
111.18	48.5354	48.5482	53.1119	54.2138	53.5338	53.9622	53.8322	54.6951			111.18	46.5658	47.1638	51.049	53.0727	52.9332	52.661	51.8529	53.0268			111.18	46.0791	50.869	53.468	53.9419	53.3621	51.8645	51.2143	52.4705
111.28	48.5502	48.521	53.1029	54.1849	53.4988	53.9411	53.8062	54.6843			111.28	46.5322	47.1182	51.0197	53.0394	52.9023	52.6279	51.8416	53.0256			111.28	46.0471	50.8372	53.468	53.9448	53.325	51.8534	51.194	52.4669
111.38	48.499	48.4979	53.0607	54.1722	53.4813	53.9085	53.7836	54.675			111.38	46.4989	47.104	51.0043	53.0347	52.8851	52.6097	51.827	53.0211			111.38	45.9992	50.8193	53.471	53.9276	53.2655	51.8377	51.1972	52.4651
111.48	48.4845	48.4822	53.0221	54.1587	53.4574	53.8761	53.7673	54.6557			111.48	46.4989	47.0996	50.9761	52.9785	52.8566	52.5812	51.8023	53.0507			111.48	45.9992	50.8193	53.4364	53.892	53.2461	51.8142	51.1785	52.4269
111.58	48.5027	48.4507	53.0087	54.1214	53.4371	53.8452	53.7536	54.6195			111.58	46.4767	47.0754	50.9339	52.9577	52.8029	52.5663	51.763	53.029			111.58	45.9832	50.8336	53.4174	53.8562	53.2507	51.811	51.163	52.3836
111.68	48.5046	48.4592	52.9656	54.107	53.4242	53.8176	53.7365	54.6086			111.68	46.3832	47.0369	50.9339	52.9221	52.7709	52.5322	51.7294	52.9695			111.68	45.9992	50.7927	53.4016	53.8348	53.2133	51.7907	51.1397	52.3783
111.78	48.5081	48.4319	52.9521	54.0732	53.4112	53.7909	53.7041	54.5993			111.78	46.4211	47.0327	50.8865	52.8922	52.7424	52.5128	51.7012	52.9225			111.78	45.9254	50.7609	53.3842	53.7992	53.1762	51.7826	51.1194	52.3403
111.88	48.4845	48.4141	52.9289	54.0519	53.379	53.7722	53.6725	54.5793			111.88	46.41	47.0085	50.8789	52.8485	52.7139	52.4935	51.6867	52.9178			111.88	45.8869	50.7485	53.373	53.7992	53.1716	51.7434	51.0978	52.3229
111.98	48.5046	48.4004	52.8965	54.0096	53.3404	53.7568	53.6514	54.5553			111.98	46.41	46.9901	50.8405	52.8197	52.6762	52.4672	51.662	52.8916			111.98	45.8869	50.7219	53.3858	53.7805	53.1063	51.7404	51.09	52.3107
112.08	48.4588	48.3878	52.8776	54.0079	53.3293	53.7251	53.6336	54.5314			112.08	46.3499	46.9757	50.8291	52.8048	52.6681	52.4329	51.6508	52.8514			112.08	45.8389	50.7307	53.3651	53.7491	53.0794	51.7388	51.0775	52.2967
112.18	48.4351	48.3732	52.8562	53.9917	53.2942	53.7023	53.6101	54.5113			112.18	46.3744	46.9159	50.8187	52.7795	52.643	52.4182	51.634	52.8171			112.18	45.8389	50.7307	53.3477	53.7277	53.0646	51.7277	51.0542	52.2707
112.28	48.4295	48.3617	52.823	53.9588	53.2841	53.6893	53.5744	54.4843			112.28	46.2676	46.9288	50.8099	52.7508	52.611	52.3931	51.589	52.8056			112.28	45.8328	50.6899	53.3098	53.6921	53.0689	51.6806	51.0681	52.2621
112.38	48.4496	48.3218	52.8049	53.9427	53.2602	53.6601	53.5566	54.4665			112.38	46.3143	46.9073	50.7701	52.7162	52.6076	52.3817	51.5609	52.7632			112.38	45.791	50.7005	53.3098	53.682	53.0526	51.6649	51.0542	52.2447
112.48	48.4351	48.3218	52.7995	53.9181	53.228	53.6373	53.5436	54.455			112.48	46.2653	46.8832	50.7355	52.676	52.5597	52.3474	51.5328	52.7276			112.48	45.791	50.6456	53.2859	53.6378	53.0348	51.6255	51.062	52.2656
112.58	48.4424	48.2863	52.7637	53.8893	53.1975	53.6081	53.5209	54.4488			112.58	46.2653	46.8688	50.7164	52.6299	52.5483	52.3452	51.4991	52.6716			112.58	45.8356	50.6242	53.2671	53.6108	52.9975	51.6098	51.0232	52.2274
112.68	48.3893	48.2831	52.7287	53.8758	53.1606	53.596	53.4853	54.4109			112.68	46.232	46.8306	50.719	52.5817	52.5369	52.3076	51.4711	52.6818			112.68	45.8549	50.6242	53.2781	53.5921	52.9826	51.5863	51.0232	52.2014
112.78	48.3821	48.2517	52.7063	53.8444	53.1302	53.5756	53.4642	54.3893			112.78	46.232	46.8162	50.6754	52.5633	52.4968	52.3042	51.4296	52.6566			112.78	45.8069	50.5763	53.2859	53.5993	52.9455	51.5706	51.0029	52.1979
112.88	48.4022	48.2495	52.6722	53.8275	53.1054	53.535	53.4447	54.3584			112.88	46.214	46.7792	50.6908	52.5553	52.4534	52.2791	51.4149	52.6416			112.88	45.759	50.5534	53.2228	53.5636	52.9455	51.547	50.9842	52.2014
112.98	48.3893	48.2077	52.647	53.8122	53.0574	53.5179	53.4163	54.3483			112.98	46.2098	46.7407	50.6716	52.5265	52.4398	52.2505	51.3701	52.6142			112.98	45.759	50.5534	53.1991	53.5422	52.9232	51.5203	50.9455	52.1841
113.08	48.362	48.2171	52.6317	53.7835	53.0224	53.4863	53.3791	54.3313			113.08	46.2274	46.7578	50.6589	52.4839	52.4112	52.222	51.3531	52.5992			113.08	45.727	50.5089	53.207	53.5278	52.9083	51.4997	50.9067	52.1579
113.18	48.3767	48.2014	52.5985	53.7665	53.0105	53.4546	53.3612	54.3028			113.18	46.1987	46.7194	50.6395	52.4552	52.3769	52.1936	51.3419	52.5706			113.18	45.727	50.5143	53.207	53.4922	52.871	51.4951	50.8958	52.1319
113.28	48.3528	48.1835	52.5599	53.7487	52.9902	53.4392	53.3393	54.2804			113.28	46.1539	46.7052	50.6268	52.4345	52.3655	52.1787	51.3139	52.5535			113.28	45.6791	50.5177	53.1833	53.4494	52.8487	51.5076	50.86	52.1059
113.38	48.3199	48.1794	52.5573	53.7318	52.9727	53.4156	53.3215	54.2588			113.38	46.1539	46.6782	50.6204	52.4196	52.329	52.1536	51.2858	52.5134			113.38	45.6725	50.4735	53.1673	53.4352	52.8115	51.4841	50.8803	52.0885
113.48	48.3199	48.1615	52.5375	53.6962	52.9597	53.3823	53.298	54.2403			113.48	46.1539	46.6625	50.6038	52.3943	52.3107	52.1365	51.2689	52.4675			113.48	45.6307	50.4735	53.1515	53.428	52.7744	51.4448	50.8445	52.0626
113.58	48.3255	48.1626	52.5196	53.6818	52.921	53.3604	53.2802	54.2202			113.58	46.1206	46.6468	50.5884	52.3771	52.2799	52.108	51.2408	52.4675			113.58	45.6791	50.4557	53.1436	53.3809	52.7519	51.4527	50.8212	52.0763
113.68	48.2853	48.15	52.5043	53.6624	52.8906	53.3425	53.2672	54.1993			113.68	46.0984	46.6098	50.5845	52.3597	52.2628	52.091	51.2408	52.4389			113.68	45.7045	50.4292	53.1041	53.378	52.7148	51.4054	50.7824	52.0885
113.78	48.267	48.1437	52.4855	53.6412	52.8575	53.3174	53.2364	54.1808			113.78	46.0716	46.5912	50.6025	52.331	52.2341	52.0624	51.2128	52.4102			113.78	45.6307	50.4115	53.0804	53.3851	52.6999	51.3897	50.7592	52.0626
113.88	48.2287	48.128	52.4613	53.6141	52.8123	53.2954	53.1959	54.1469			113.88	46.0582	46.5699	50.5781	52.3023	52.217	52.051	51.1734	52.4068			113.88	45.5827	50.3636	53.0834	53.3495	52.6776	51.3694	50.7544	52.0399
113.98	48.2196	48.106	52.4254	53.5878	52.7985	53.2752	53.1756	54.1283			113.98	46.0651	46.5699	50.5629	52.2734	52.1976	52.0373	51.1566	52.3599			113.98	45.5987	50.3263	53.0456	53.3281	52.6403	51.3851	50.7622	52.0452
114.08	48.2067	48.086	52.4191	53.5752	52.781	53.2524	53.1351	54.1143			114.08	46.0651	46.5557	50.5436	52.2447	52.1714	51.9974	51.1286	52.3437			114.08	45.5508	50.2961	53.0407	53.3067	52.6031	51.3505	50.7202	52.0017
114.18	48.1995	48.0703	52.3984	53.5421	52.7506	53.2232	53.1092	54.102			114.18	46.0651	46.54	50.5308	52.216	52.1542	51.9825	51.123	52.3185			114.18	45.5893	50.2695	53.0012	53.2709	52.5778	51.308	50.6628	52.0157
114.28	48.1976	48.0483	52.3733	53.5116	52.7414	53.1834	53.0905	54.0726			114.28	46.0092	46.5271	50.4925	52.1873	52.1256	51.9655	51.1118	52.2727			114.28	45.6307	50.2375	53.0012	53.2681	52.5585	51.2829	50.6317	51.9757
114.38	48.2013	48.0368	52.3446	53.4981	52.6926	53.163	53.0637	54.0533			114.38	46.0428	46.5271	50.4605	52.1585	52.0834	51.9256	51.0927	52.2613			114.38	45.5827	50.2073	52.9854	53.2495	52.5363	51.2656	50.6192	51.9584
114.48	48.1829	48.0211	52.3222	53.4761	52.6796	53.1501	53.0216	54.0341			114.48	46.0428	46.4915	50.4451	52.1551	52.0686	51.9107	51.0579	52.2074			114.48	45.5508	50.1808	52.9381	53.2139	52.5048	51.2436	50.6037	51.9184
114.58	48.1539	48.0106	52.2962	53.4523	52.6585	53.1265	53.0014	53.9939			114.58	46.0428	46.4817	50.4412	52.1298	52.04	51.8972	51.0477	52.181			114.58	45.5508	50.1417	52.9223	53.1925	52.4543	51.2247	50.5572	51.927
114.68	48.1464	47.9845	52.2593	53.4184	52.6216	53.0818	52.9868	53.9699			114.68	46.0428	46.4531	50.4284	52.1011	52.0229	51.8685	51.0297	52.1775			114.68	45.5028	50.1097	52.8826	53.1781	52.432	51.1666	50.5184	51.915
114.78	48.1373	47.997	52.2539	53.4108	52.5911	53.0762	52.9576	53.9646			114.78	46.036	46.4275	50.4092	52.0722	51.9944	51.8401	51.0017	52.173			114.78	45.509	50.092	52.8589	53.1596	52.3947	51.162	50.4794	51.8888
114.88	48.1555	47.9582	52.219	53.4015	52.5663	53.0599	52.9446	53.9336			114.88	46.0428	46.4303	50.3965	52.055	51.9567	51.8287	50.9826	52.1684			114.88	45.5188	50.0654	52.8431	53.1567	52.3798	51.165	50.4281	51.8715
114.98	48.1483	47.954	52.2055	53.3601	52.546	53.0339	52.9275	53.9051			114.98	46.0428	46.4133	50.3773	52.0263	51.9235	51.8001	50.9804	52.1444			114.98	45.4868	50.069	52.8382	53.121	52.3575	51.1304	50.4252	51.8455
115.08	48.1118	47.9184	52.1741	53.3363	52.4944	52.9934	52.9049	53.8981			115.08	46.0605	46.4246	50.3581	51.9975	51.9087	51.7659	50.9748	52.1501			115.08	45.4389	50.0477	52.8273	53.1282	52.3025	51.1225	50.36	51.875
115.18	48.1099	47.9184	52.1741	53.3151	52.4833	52.9804	52.8935	53.8742			115.18	46.0651	46.3918	50.335	51.9895	51.8916	51.7204	50.9489	52.1282			115.18	45.4163	50.0211	52.7797	53.1068	52.2756	51.0833	50.3629	51.8542
115.28	48.13	47.9059	52.1383	53.3042	52.4677	52.9738	52.8692	53.8449			115.28	46.0428	46.3605	50.3133	51.963	51.8629	51.6918	50.9321	52.1272			115.28	45.3905	50.0034	52.7639	53.071	52.2533	51.0676	50.3242	51.8368
115.38	48.0844	47.8828	52.1051	53.2753	52.428	52.9511	52.8417	53.8194			115.38	46.0693	46.3349	50.3159	51.9883	51.8629	51.6633	50.9118	52.0974			115.38	45.3651	49.9768	52.7402	53.0353	52.2564	51.0676	50.2854	51.8108
115.48	48.0788	47.8524	52.1042	53.2491	52.4096	52.9397	52.8335	53.8047			115.48	46.0161	46.3136	50.2851	51.963	51.8344	51.6463	50.8815	52.1122			115.48	45.3843	49.9378	52.7402	53.0496	52.2088	51.0282	50.2621	51.8159
115.58	48.0643	47.8514	52.0934	53.2457	52.3654	52.904	52.8205	53.7754			115.58	46.036	46.2879	50.2685	51.9516	51.823	51.6349	50.8794	52.0722			115.58	45.3425	49.9058	52.7244	53.0211	52.2013	50.9889	50.2419	51.8022
115.68	48.0826	47.8377	52.0575	53.2195	52.3479	52.8813	52.7905	53.7507			115.68	46.0092	46.2808	50.2494	51.9343	51.7945	51.6235	50.8647	52.0263			115.68	45.3106	49.8703	52.7007	52.9997	52.167	50.9654	50.2387	51.7762
115.78	48.0204	47.8221	52.0333	53.1737	52.3378	52.8585	52.776	53.7266			115.78	45.9694	46.2708	50.2364	51.9055	51.7773	51.6086	50.8367	51.9942			115.78	45.2626	49.8295	52.661	52.9641	52.1343	50.9654	50.1876	51.7586
115.88	48.015	47.8304	52.0234	53.1686	52.3139	52.8293	52.7565	53.7058			115.88	45.9827	46.2708	50.202	51.8883	51.735	51.5835	50.794	51.9953			115.88	45.2626	49.7959	52.6373	52.9568	52.112	50.9543	50.1689	51.7326
115.98	48.0021	47.7874	52.0054	53.1542	52.2963	52.8163	52.7395	53.6927			115.98	45.9537	46.2281	50.1662	51.8768	51.7054	51.5607	50.7973	51.9553			115.98	45.3011	49.7727	52.6215	52.9211	52.0748	50.9183	50.1502	51.7362
116.08	47.9912	47.7822	51.991	53.1331	52.2825	52.787	52.7184	53.6672			116.08	45.9537	46.2139	50.1367	51.8596	51.6745	51.5323	50.7693	51.906			116.08	45.2626	49.755	52.5979	52.9069	52.0198	50.9024	50.0834	51.724
116.18	47.9692	47.7465	51.974	53.1018	52.2484	52.7773	52.6908	53.651			116.18	45.9582	46.1754	50.1213	51.8309	51.646	51.5037	50.7412	51.8774			116.18	45.2626	49.7284	52.5821	52.8855	52.0198	50.8789	50.057	51.672
116.28	47.9236	47.713	51.9507	53.0712	52.2419	52.7562	52.6649	53.6271			116.28	45.9827	46.1568	50.1021	51.8194	51.646	51.4923	50.7243	51.8338			116.28	45.2626	49.7107	52.5584	52.8499	51.9855	50.8553	50.0446	51.6286
116.38	47.9729	47.7036	51.9184	53.0425	52.218	52.7164	52.6512	53.5923			116.38	45.9537	46.1355	50.0997	51.802	51.6026	51.4468	50.6962	51.8293			116.38	45.2306	49.6839	52.5663	52.8312	51.9706	50.8397	50.0027	51.5991
116.48	47.9292	47.7036	51.895	53.0162	52.2189	52.7009	52.6058	53.5621			116.48	45.9537	46.1	50.083	51.7733	51.5981	51.4182	50.6794	51.8201			116.48	45.2306	49.6628	52.5426	52.8256	51.9557	50.7926	49.9591	51.5851
116.58	47.9182	47.6753	51.8601	53.0001	52.1718	52.6741	52.596	53.5382			116.58	45.8802	46.0458	50.0702	51.7446	51.5717	51.3726	50.685	51.8051			116.58	45.2306	49.6308	52.5029	52.7927	51.9184	50.7956	49.9391	51.5591
116.68	47.911	47.6775	51.8618	52.9679	52.1488	52.6717	52.5717	53.5089			116.68	45.8936	46.0544	50.0165	51.725	51.5409	51.344	50.6491	51.78			116.68	45.2306	49.6131	52.495	52.757	51.8961	50.761	49.8737	51.5158
116.78	47.8962	47.6575	51.8385	52.9425	52.1314	52.6515	52.5515	53.4819			116.78	45.8981	46.0216	49.9998	51.6985	51.5089	51.3156	50.6176	51.7627			116.78	45.2306	49.6076	52.4982	52.7212	51.859	50.7218	49.8613	51.5278
116.88	47.8689	47.6281	51.8187	52.9272	52.0991	52.6336	52.5312	53.4586			116.88	45.8648	45.9932	49.9806	51.6813	51.4975	51.27	50.5896	51.7055			116.88	45.2306	49.6131	52.4792	52.6684	51.859	50.7061	49.8271	51.5158
116.98	47.8689	47.6093	51.8196	52.9027	52.0816	52.5978	52.5126	53.4278			116.98	45.8648	45.9718	49.9678	51.6641	51.4633	51.2414	50.5728	51.6631			116.98	45.1503	49.5688	52.4871	52.6642	51.8395	50.6825	49.7929	51.4898
117.08	47.8086	47.5841	51.8134	52.8807	52.0669	52.5946	52.4996	53.4147			117.08	45.8825	45.9675	49.9639	51.6411	51.469	51.213	50.5446	51.6253			117.08	45.1503	49.5511	52.4634	52.6286	51.8113	50.6668	49.7416	51.4289
117.18	47.8048	47.5601	51.79	52.8604	52.0548	52.5686	52.4599	53.3922			117.18	45.8135	45.9361	49.9396	51.6376	51.4405	51.1845	50.5166	51.5989			117.18	45.1343	49.5386	52.4476	52.6141	51.8052	50.6401	49.7138	51.3907
117.28	47.7866	47.5161	51.7506	52.8366	52.018	52.5482	52.4299	53.3761			117.28	45.8024	45.9048	49.9128	51.6123	51.4232	51.1559	50.5075	51.6115			117.28	45.1023	49.5243	52.4239	52.5714	51.7816	50.6352	49.6719	51.3769
117.38	47.7866	47.4992	51.7191	52.8104	52.0198	52.528	52.412	53.3467			117.38	45.7868	45.8792	49.8846	51.5836	51.3856	51.1537	50.4942	51.5967			117.38	45.1023	49.4977	52.3842	52.5571	51.7622	50.596	49.6331	51.3334
117.48	47.7592	47.495	51.6984	52.7824	52.0069	52.5077	52.3966	53.322			117.48	45.7868	45.865	49.8654	51.5549	51.3684	51.1388	50.4661	51.5679			117.48	45.0704	49.4534	52.3605	52.5357	51.7473	50.5755	49.6096	51.2901
117.58	47.7319	47.4584	51.685	52.7477	51.9747	52.4874	52.3674	53.3034			117.58	45.8135	45.855	49.8527	51.526	51.3719	51.1104	50.4492	51.5565			117.58	45.0704	49.4125	52.3575	52.4999	51.7325	50.5568	49.5989	51.2641
117.68	47.7136	47.4417	51.6464	52.7367	51.9388	52.463	52.3634	53.2795			117.68	45.8201	45.8222	49.8423	51.4916	51.3548	51.0933	50.4211	51.5279			117.68	45.0224	49.3823	52.348	52.5171	51.7102	50.5174	49.5786	51.2207
117.78	47.6916	47.4101	51.6357	52.7181	51.9332	52.4346	52.3261	53.2502			117.78	45.7714	45.8393	49.8078	51.4801	51.3377	51.0762	50.3763	51.5358			117.78	45.029	49.3646	52.321	52.4857	51.6877	50.5441	49.5398	51.2207
117.88	47.708	47.406	51.6087	52.6868	51.9231	52.424	52.3139	53.2332			117.88	45.7312	45.7967	49.7886	51.4605	51.309	51.0568	50.3649	51.5243			117.88	44.9904	49.3381	52.3052	52.453	51.6654	50.5095	49.5056	51.1772
117.98	47.6643	47.3924	51.5935	52.6731	51.8964	52.3842	52.2945	53.203			117.98	45.758	45.7937	49.7758	51.4514	51.2805	51.0305	50.3201	51.5026			117.98	44.9904	49.3026	52.2814	52.4358	51.6282	50.486	49.4963	51.1807
118.08	47.6404	47.3421	51.5684	52.636	51.877	52.368	52.2702	53.1829			118.08	45.7603	45.7582	49.7516	51.434	51.252	50.9929	50.3222	51.4819			118.08	44.9904	49.2761	52.2656	52.4287	51.6134	50.4624	49.4621	51.1565
118.18	47.6552	47.3315	51.5369	52.6054	51.8568	52.3484	52.2507	53.1614			118.18	45.7312	45.7369	49.7182	51.4053	51.2212	50.9735	50.2977	51.4614			118.18	44.9585	49.2581	52.2656	52.393	51.6357	50.4232	49.4466	51.1199
118.28	47.5984	47.2908	51.5315	52.5851	51.831	52.3258	52.2199	53.1629			118.28	45.6979	45.7055	49.7054	51.3766	51.1892	50.9621	50.2729	51.4133			118.28	44.9105	49.2316	52.2182	52.3616	51.6134	50.4121	49.4233	51.113
118.38	47.5675	47.2592	51.5038	52.5555	51.8162	52.3062	52.1801	53.1343			118.38	45.6646	45.6585	49.7016	51.3731	51.1778	50.9336	50.2471	51.3938			118.38	44.8781	49.2352	52.2024	52.3572	51.576	50.3759	49.4001	51.0732
118.48	47.5619	47.2425	51.4922	52.525	51.7831	52.2697	52.1478	53.115			118.48	45.6688	45.6612	49.6926	51.3674	51.1778	50.9052	50.2167	51.3788			118.48	44.8302	49.2139	52.1597	52.3216	51.5612	50.3367	49.3846	51.0506
118.58	47.5675	47.2195	51.4741	52.5021	51.7775	52.2559	52.1227	53.0958			118.58	45.6711	45.6443	49.6761	51.3363	51.1583	50.8903	50.1853	51.3812			118.58	44.7982	49.1873	52.1518	52.2859	51.5166	50.3131	49.3611	51.0037
118.68	47.5493	47.1932	51.4679	52.4809	51.7379	52.234	52.087	53.0903			118.68	45.6156	45.5943	49.6607	51.3329	51.132	50.8652	50.1572	51.3674			118.68	44.7982	49.1873	52.1311	52.2816	51.4913	50.3162	49.3518	50.9603
118.78	47.509	47.1545	51.4266	52.4514	51.714	52.2178	52.0651	53.0703			118.78	45.5865	45.5617	49.6479	51.3191	51.1149	50.8481	50.1595	51.3388			118.78	44.8015	49.1873	52.0916	52.2545	51.4675	50.3099	49.3378	50.943
118.88	47.4908	47.1377	51.4042	52.4386	51.6881	52.1861	52.0448	53.0547			118.88	45.5865	45.5446	49.6312	51.2961	51.0864	50.8196	50.1213	51.3273			118.88	44.7982	49.1571	52.1106	52.2459	51.4541	50.2737	49.3146	50.9168
118.98	47.4943	47.1252	51.3764	52.4047	51.6734	52.165	52.0164	53.0285			118.98	45.5865	45.5345	49.5967	51.2789	51.0577	50.8002	50.0842	51.31			118.98	44.7982	49.1341	52.0758	52.2145	51.408	50.258	49.2758	50.8995
119.08	47.4833	47.1042	51.353	52.3836	51.6651	52.1422	51.9921	53.0115			119.08	45.5532	45.4733	49.5788	51.2708	51.043	50.7763	50.073	51.2929			119.08	44.7662	49.0951	52.0758	52.2287	51.3827	50.2345	49.2649	50.8735
119.18	47.4359	47.0728	51.3324	52.3641	51.6236	52.1317	51.9719	52.9868			119.18	45.5532	45.4449	49.5583	51.2443	51.0292	50.7718	50.045	51.2907			119.18	44.7183	49.0631	52.0363	52.2044	51.3827	50.2329	49.2339	50.8475
119.28	47.4522	47.0571	51.3009	52.3379	51.6016	52.0984	51.9435	52.9567			119.28	45.5575	45.3708	49.5264	51.2328	51.0007	50.7455	50.0079	51.285			119.28	44.6605	49.0133	52.0315	52.186	51.3455	50.2188	49.2245	50.8042
119.38	47.445	47.0288	51.2902	52.2963	51.5941	52.0968	51.9354	52.942			119.38	45.5375	45.3637	49.5134	51.1984	50.9722	50.7284	49.9866	51.2665			119.38	44.6543	49.0152	52.0203	52.1717	51.3455	50.1606	49.2136	50.7988
119.48	47.4487	47.0434	51.2839	52.2752	51.584	52.0748	51.9192	52.9273			119.48	45.4977	45.3451	49.5097	51.1754	50.9436	50.717	49.9608	51.2471			119.48	44.6059	48.9779	51.9966	52.1503	51.3082	50.1355	49.1949	50.7606
119.58	47.4214	46.9921	51.2695	52.265	51.56	52.0497	51.8803	52.9042			119.58	45.4977	45.3194	49.479	51.1444	50.9241	50.6965	49.9573	51.2184			119.58	44.574	48.9566	51.9381	52.1573	51.3082	50.1244	49.1516	50.7606
119.68	47.4249	46.9701	51.2453	52.2404	51.5139	52.0382	51.8552	52.8872			119.68	45.4752	45.2954	49.4623	51.1121	50.9231	50.6884	49.9327	51.2069			119.68	44.574	48.93	51.9177	52.1359	51.3053	50.0898	49.1281	50.7173
119.78	47.3847	46.9491	51.2391	52.2269	51.4992	52.0171	51.8357	52.8857			119.78	45.4418	45.2768	49.4111	51.0949	50.9094	50.66	49.8957	51.1726			119.78	44.5486	48.93	51.8701	52.1145	51.2859	50.0774	49.1126	50.6531
119.88	47.3847	46.9239	51.1942	52.1904	51.4743	51.9895	51.8057	52.8655			119.88	45.4085	45.2597	49.3817	51.0971	50.8716	50.6429	49.8485	51.1519			119.88	44.5678	48.8857	51.8306	52.1003	51.2859	50.0381	49.0893	50.6218
119.98	47.3664	46.9104	51.1726	52.1676	51.4541	51.9652	51.7668	52.8486			119.98	45.402	45.2454	49.3664	51.0661	50.8579	50.6178	49.8315	51.121			119.98	44.574	48.8857	51.7911	52.0646	51.2636	50.0144	49.0692	50.6444
120.08	47.3611	46.8842	51.1511	52.1422	51.4394	51.9538	51.7449	52.8201			120.08	45.3863	45.2099	49.3573	51.0639	50.7986	50.6086	49.8126	51.1038			120.08	44.574	48.868	51.7879	52.0431	51.2487	49.9752	49.0583	50.6218
120.18	47.3391	46.8664	51.1358	52.1142	51.4264	51.9311	51.7311	52.8154			120.18	45.3863	45.19	49.3318	51.0489	50.7974	50.636	49.8035	51.1038			120.18	44.526	48.8146	51.7435	52.0288	51.2264	49.9595	49.035	50.6044
120.28	47.3208	46.8338	51.1241	52.0922	51.409	51.9027	51.7125	52.7868			120.28	45.3706	45.1672	49.3087	51.0374	50.7722	50.6143	49.7755	51.0752			120.28	44.526	48.8183	51.7231	52.0146	51.2114	49.9359	49.035	50.5611
120.38	47.2715	46.8161	51.1017	52.0677	51.385	51.8921	51.6785	52.7583			120.38	45.3752	45.1457	49.2768	51.034	50.7437	50.5972	49.7475	51.058			120.38	44.526	48.7969	51.7277	52.0074	51.1742	49.8965	49.0118	50.5558
120.48	47.2479	46.7898	51.0721	52.0676	51.3573	51.8563	51.6711	52.735			120.48	45.3262	45.1457	49.2922	51.034	50.7266	50.5721	49.7305	51.0557			120.48	44.4781	48.7792	51.6882	51.9861	51.152	49.9092	48.9728	50.4969
120.58	47.2624	46.7447	51.0685	52.0202	51.3362	51.8295	51.6339	52.7088			120.58	45.3128	45.106	49.2537	50.9972	50.6981	50.5517	49.7025	51.0523			120.58	44.4781	48.7792	51.6485	51.9718	51.1548	49.9029	48.9496	50.5038
120.68	47.2112	46.751	51.0479	52.0042	51.3085	51.819	51.6071	52.7042			120.68	45.3196	45.0987	49.2193	50.9798	50.6809	50.5403	49.6744	51.0236			120.68	44.526	48.7527	51.6485	51.9504	51.1371	49.8621	48.9682	50.4916
120.78	47.1929	46.7218	51.0452	51.9829	51.2891	51.7914	51.5682	52.6787			120.78	45.2971	45.1031	49.1999	50.9547	50.6638	50.4946	49.6576	51.0121			120.78	44.4682	48.7084	51.6091	51.9576	51.1371	49.8369	48.9154	50.4916
120.88	47.1929	46.7112	51.0273	51.9627	51.279	51.7865	51.5447	52.6671			120.88	45.2795	45.0889	49.1847	50.9224	50.6616	50.4832	49.6463	50.9743			120.88	44.4621	48.7349	51.5933	51.9362	51.1148	49.8416	48.8953	50.4482
120.98	47.1894	46.6996	51.0237	51.9389	51.256	51.7483	51.5342	52.6508			120.98	45.2194	45.046	49.168	50.9143	50.649	50.4662	49.6318	50.9376			120.98	44.4141	48.6693	51.5696	51.9104	51.0657	49.7788	48.8718	50.4482
121.08	47.1509	46.6987	50.9833	51.9051	51.2274	51.7362	51.5114	52.6293			121.08	45.2373	45.0077	49.1361	50.8878	50.6182	50.4377	49.6047	50.9262			121.08	44.4141	48.6107	51.5301	51.8861	51.0597	49.7551	48.8486	50.4049
121.18	47.1693	46.6567	50.9645	51.8652	51.2071	51.728	51.4855	52.6068			121.18	45.2083	45.0006	49.1169	50.8764	50.5895	50.4091	49.5734	50.9147			121.18	44.4141	48.593	51.5141	51.8647	51.0298	49.752	48.8517	50.3927
121.28	47.1565	46.6557	50.9519	51.8517	51.1702	51.7021	51.4653	52.5898			121.28	45.2128	44.982	49.0848	50.8591	50.561	50.3977	49.5475	50.8976			121.28	44.3817	48.5876	51.4825	51.8434	51.006	49.7285	48.8331	50.3962
121.38	47.1509	46.6358	50.933	51.8288	51.1472	51.6931	51.4328	52.5706			121.38	45.2014	44.9777	49.0951	50.8419	50.5461	50.3771	49.534	50.8471			121.38	44.3657	48.5753	51.4667	51.8119	51.0032	49.6923	48.7989	50.3527
121.48	47.1436	46.6169	50.933	51.8077	51.1104	51.659	51.4125	52.542			121.48	45.1416	44.9421	49.0656	50.8304	50.5268	50.3692	49.534	50.8483			121.48	44.3657	48.5485	51.443	51.8075	50.954	49.6953	48.774	50.3354
121.58	47.1291	46.6012	50.9115	51.7881	51.0947	51.6265	51.402	52.5181			121.58	45.1638	44.9394	49.0337	50.8132	50.4924	50.3579	49.506	50.823			121.58	44.3657	48.5576	51.4035	51.7719	50.9361	49.6766	48.7553	50.3476
121.68	47.1018	46.5803	50.8998	51.7679	51.091	51.5989	51.3664	52.4833			121.68	45.1482	44.9563	49.0106	50.8016	50.4731	50.3498	49.4892	50.823			121.68	44.3338	48.5451	51.3687	51.7576	50.9033	49.6561	48.7398	50.3094
121.78	47.1235	46.5876	50.8756	51.7315	51.0532	51.5811	51.346	52.4516			121.78	45.1527	44.9009	49.0016	50.7936	50.4559	50.3406	49.4892	50.7852			121.78	44.2858	48.5167	51.2974	51.7505	50.8692	49.6136	48.7165	50.2834
121.88	47.0615	46.5656	50.8666	51.7103	51.0385	51.5534	51.3153	52.4409			121.88	45.1305	44.8938	49.0016	50.7671	50.4297	50.3145	49.4701	50.7716			121.88	44.2858	48.5008	51.277	51.7149	50.8468	49.5744	48.6901	50.2661
121.98	47.0707	46.5372	50.8388	51.6976	51.0256	51.5388	51.3128	52.403			121.98	45.108	44.8752	48.9888	50.7464	50.4125	50.2951	49.4645	50.7371			121.98	44.2538	48.4456	51.261	51.6763	50.8201	49.5587	48.6545	50.2487
122.08	47.0323	46.5121	50.8298	51.6781	51.0044	51.5299	51.2869	52.3906			122.08	45.0747	44.8781	48.9505	50.7234	50.4011	50.2553	49.4465	50.7176			122.08	44.2059	48.4475	51.2373	51.6791	50.7917	49.5476	48.6545	50.2016
122.18	47.0323	46.5121	50.7948	51.6434	51.0063	51.5144	51.2667	52.3621			122.18	45.0747	44.8553	48.9529	50.7327	50.3634	50.2472	49.4577	50.6992			122.18	44.1739	48.4368	51.1978	51.6577	50.7724	49.4957	48.6311	50.2001
122.28	47.0248	46.5048	50.7698	51.6341	50.9722	51.4965	51.2342	52.3427			122.28	45.0525	44.8397	48.9377	50.6866	50.3576	50.238	49.433	50.7004			122.28	44.1255	48.3889	51.1583	51.6434	50.7351	49.4722	48.6155	50.1619
122.38	47.0103	46.4807	50.7607	51.5935	50.9583	51.4682	51.214	52.3234			122.38	45.0525	44.8182	48.9159	50.6579	50.3327	50.221	49.4049	50.6821			122.38	44.1579	48.3712	51.1107	51.6221	50.698	49.4565	48.5923	50.1359
122.48	47.0047	46.4577	50.7446	51.5764	50.9261	51.456	51.2002	52.2964			122.48	45.0191	44.7926	48.8864	50.6372	50.3132	50.2039	49.3881	50.6626			122.48	44.1514	48.3232	51.1186	51.6078	50.6831	49.433	48.5535	50.1185
122.58	46.9884	46.4671	50.7249	51.5587	50.9104	51.4454	51.1791	52.2941			122.58	45.0191	44.7897	48.9018	50.6292	50.2983	50.2062	49.3466	50.6432			122.58	44.1096	48.2915	51.0791	51.5607	50.6608	49.4251	48.5147	50.075
122.68	46.983	46.4671	50.7006	51.5384	50.8754	51.4194	51.167	52.2624			122.68	45.0191	44.7855	48.8827	50.6004	50.2698	50.1754	49.3319	50.6168			122.68	44.1096	48.2737	51.0743	51.5364	50.5894	49.4173	48.4913	50.049
122.78	46.9591	46.4335	50.679	51.5155	50.8459	51.4015	51.1612	52.2516			122.78	45.0035	44.7584	48.8481	50.5545	50.2413	50.1503	49.3173	50.5904			122.78	44.1096	48.2292	51.0443	51.5121	50.5492	49.4094	48.4945	50.0057
122.88	46.9189	46.4335	50.645	51.4944	50.8173	51.3732	51.1353	52.2284			122.88	45.008	44.7329	48.8135	50.5234	50.2297	50.1321	49.3151	50.5778			122.88	44.0776	48.2558	51.0157	51.5035	50.5269	49.37	48.4758	50.0194
122.98	46.9337	46.4052	50.6351	51.4884	50.7897	51.3602	51.1248	52.2022			122.98	44.9679	44.7329	48.7904	50.4969	50.215	50.1354	49.2757	50.5709			122.98	44.0296	48.2292	50.992	51.4865	50.4895	49.3497	48.437	49.997
123.08	46.9044	46.3989	50.6109	51.4511	50.7583	51.3357	51.1142	52.1728			123.08	44.9636	44.7186	48.7816	50.4658	50.1841	50.107	49.2701	50.5366			123.08	44.0296	48.2115	50.9683	51.4649	50.4524	49.3543	48.3951	49.9275
123.18	46.9007	46.3843	50.5759	51.4207	50.7363	51.3187	51.0843	52.1551			123.18	44.93	44.6971	48.7713	50.4245	50.1419	50.0899	49.268	50.5251			123.18	44.0296	48.185	50.9558	51.4293	50.4301	49.3275	48.3748	49.9101
123.28	46.8953	46.3706	50.5705	51.4096	50.7353	51.3008	51.0583	52.1458			123.28	44.9567	44.7143	48.7393	50.4107	50.1213	50.0613	49.2589	50.4965			123.28	44.0296	48.1672	50.9526	51.4079	50.3929	49.2915	48.3515	49.8877
123.38	46.8514	46.3602	50.5408	51.3825	50.7252	51.2733	51.0477	52.1172			123.38	44.9146	44.6971	48.7202	50.3784	50.0928	50.0363	49.2365	50.4678			123.38	44.0296	48.1618	50.9368	51.405	50.3779	49.2758	48.3251	49.8408
123.48	46.846	46.3518	50.5076	51.369	50.6967	51.2473	51.0218	52.1049			123.48	44.9078	44.6829	48.6779	50.3762	50.0733	49.9873	49.2421	50.4644			123.48	43.9977	48.1407	50.9131	51.3865	50.3379	49.271	48.3128	49.7973
123.58	46.8331	46.3425	50.4798	51.3529	50.6773	51.2286	50.9984	52.0925			123.58	44.8744	44.6403	48.6561	50.3475	50.0585	49.9701	49.2141	50.4425			123.58	43.9497	48.1227	50.8973	51.3836	50.3184	49.2207	48.274	49.8268
123.68	46.8076	46.334	50.4619	51.3241	50.6607	51.1977	50.9992	52.0546			123.68	44.8411	44.6089	48.6535	50.305	50.0436	49.9416	49.2016	50.4106			123.68	43.9017	48.0962	50.8734	51.3794	50.3184	49.1923	48.2505	49.7886
123.78	46.7819	46.3078	50.4377	51.2911	50.6423	51.1961	50.9837	52.0469			123.78	44.8588	44.6047	48.637	50.2819	50.0356	49.9336	49.1915	50.407			123.78	43.8694	48.0928	50.8497	51.3436	50.2813	49.1939	48.2304	49.7453
123.88	46.7838	46.2942	50.4269	51.2852	50.6247	51.158	50.9603	52.0376			123.88	44.8633	44.616	48.605	50.267	49.9933	49.8961	49.1635	50.3818			123.88	43.8374	48.0696	50.8766	51.2966	50.2588	49.1736	48.1962	49.7331
123.98	46.7583	46.2691	50.3821	51.2758	50.6082	51.1246	50.9399	52.0269			123.98	44.8232	44.5976	48.6114	50.2381	49.9922	49.8675	49.1467	50.3613			123.98	43.8759	48.0376	50.8576	51.305	50.2217	49.1704	48.1807	49.714
124.08	46.7583	46.2586	50.3631	51.2572	50.5713	51.1214	50.9359	52.016			124.08	44.7856	44.6003	48.5819	50.2094	49.9786	49.8641	49.1275	50.3509			124.08	43.8374	48.0076	50.8181	51.2822	50.2068	49.1501	48.142	49.6757
124.18	46.7637	46.226	50.3497	51.2428	50.5446	51.0905	50.9108	51.989			124.18	44.7676	44.5719	48.5474	50.1887	49.9328	49.839	49.1185	50.3246			124.18	43.8054	48.004	50.8181	51.258	50.1697	49.1342	48.1185	49.6811
124.28	46.7784	46.2208	50.3228	51.2234	50.5271	51.0621	50.8938	51.9821			124.28	44.781	44.5805	48.5282	50.1669	49.9157	49.8106	49.1017	50.2959			124.28	43.8054	47.9667	50.8023	51.2394	50.1697	49.0871	48.103	49.6411
124.38	46.7326	46.2136	50.2995	51.1996	50.4995	51.0418	50.8727	51.9643			124.38	44.7454	44.5435	48.5115	50.1519	49.9008	49.782	49.0849	50.2649			124.38	43.7575	47.9365	50.7786	51.2052	50.1472	49.0871	48.0797	49.6186
124.48	46.7216	46.203	50.2672	51.1793	50.4857	51.019	50.85	51.9373			124.48	44.7764	44.5148	48.5027	50.1313	49.8758	49.7649	49.0568	50.2637			124.48	43.7575	47.9188	50.7786	51.1824	50.11	49.106	48.0533	49.584
124.58	46.7272	46.1957	50.2331	51.1412	50.4681	51.0012	50.8289	51.9002			124.58	44.7343	44.5021	48.4833	50.1002	49.8735	49.7364	49.0265	50.2639			124.58	43.7255	47.8922	50.7389	51.1723	50.0877	49.0525	48.0098	49.5769
124.68	46.6596	46.1977	50.1981	51.1403	50.4376	50.9655	50.8208	51.9064			124.68	44.7477	44.495	48.4514	50.0807	49.8586	49.708	49.0287	50.2363			124.68	43.7255	47.8657	50.7152	51.1367	50.055	49.0274	47.9943	49.5804
124.78	46.6725	46.1757	50.1837	51.1064	50.4165	50.9597	50.7843	51.8701			124.78	44.7274	44.4766	48.4424	50.0656	49.8208	49.6907	49.0253	50.2042			124.78	43.6775	47.848	50.6962	51.1151	50.0432	49.0085	47.9787	49.5369
124.88	46.654	46.1694	50.1505	51.0835	50.4175	50.9362	50.7779	51.8577			124.88	44.7297	44.4935	48.4296	50.0623	49.798	49.6623	49.0006	50.1734			124.88	43.6775	47.8035	50.6946	51.0795	49.991	48.9692	47.9509	49.5404
124.98	46.6122	46.1485	50.1245	51.0709	50.3806	50.9126	50.7649	51.8199			124.98	44.7075	44.4837	48.3937	50.0369	49.765	49.6509	48.9726	50.1413			124.98	43.6775	47.7946	50.6757	51.0581	49.9687	48.9692	47.9322	49.5195
125.08	46.5902	46.1297	50.0851	51.0709	50.3455	50.8932	50.7471	51.7983			125.08	44.7075	44.4622	48.381	50.0082	49.7249	49.6132	48.9558	50.1125			125.08	43.6296	47.7912	50.6757	51.0368	49.9315	48.9535	47.9352	49.4762
125.18	46.572	46.1422	50.0581	51.0413	50.3289	50.8786	50.7292	51.7789			125.18	44.6654	44.4381	48.3618	49.9795	49.7273	49.603	48.9367	50.1011			125.18	43.6296	47.7537	50.652	51.0053	49.921	48.93	47.9012	49.4502
125.28	46.5663	46.1191	50.0473	51.0217	50.3151	50.8534	50.7098	51.7674			125.28	44.6631	44.4195	48.3644	49.9622	49.6988	49.5768	48.9523	50.0667			125.28	43.5812	47.7326	50.636	50.9653	49.8972	48.8749	47.8777	49.4467
125.38	46.5446	46.1119	50.0187	50.9955	50.2838	50.8249	50.6935	51.7481			125.38	44.6673	44.3982	48.3336	49.9657	49.6872	49.5369	48.9142	50.0689			125.38	43.5492	47.7201	50.5966	50.9439	49.9062	48.8702	47.8622	49.4553
125.48	46.5189	46.0847	50.0096	50.9735	50.2626	50.7933	50.6741	51.7287			125.48	44.701	44.4009	48.3107	49.96	49.6839	49.5197	48.8828	50.0439			125.48	43.5492	47.7201	50.5777	50.9083	49.8749	48.8513	47.8577	49.4485
125.58	46.5025	46.0542	49.9755	50.9524	50.2488	50.7705	50.6733	51.7095			125.58	44.6742	44.384	48.2979	49.9185	49.6587	49.4912	48.8793	50.0265			125.58	43.5751	47.6652	50.568	50.8725	49.8347	48.8246	47.8467	49.4207
125.68	46.466	46.0531	49.9522	50.9311	50.223	50.7591	50.6546	51.6902			125.68	44.6474	44.3583	48.257	49.9163	49.6302	49.4765	48.8524	50.0151			125.68	43.5332	47.635	50.4907	50.8897	49.8199	48.8042	47.836	49.398
125.78	46.4714	46.0405	49.9307	50.8973	50.1954	50.7258	50.6278	51.6748			125.78	44.6409	44.3668	48.2299	49.899	49.6017	49.432	48.8345	50.0037			125.78	43.5013	47.5907	50.47	50.8697	49.7976	48.801	47.8002	49.372
125.88	46.4497	46.0248	49.9091	50.8761	50.1824	50.6983	50.6027	51.6608			125.88	44.6186	44.3482	48.2147	49.9048	49.5845	49.4171	48.8434	49.9601			125.88	43.4754	47.5907	50.4653	50.8511	49.7976	48.7994	47.7769	49.4016
125.98	46.4312	46.0144	49.8966	50.8533	50.1474	50.682	50.5874	51.6493			125.98	44.6186	44.334	48.1955	49.8875	49.5652	49.4057	48.8154	49.9384			125.98	43.4213	47.5462	50.3989	50.8155	49.7825	48.7648	47.766	49.3669
126.08	46.4202	45.9808	49.8786	50.8269	50.1447	50.6641	50.5712	51.6268			126.08	44.6118	44.3127	48.1826	49.845	49.556	49.3716	48.7817	49.9234			126.08	43.3894	47.5462	50.4099	50.7968	49.7825	48.7131	47.7334	49.346
126.18	46.4258	45.9673	49.8302	50.8151	50.1207	50.6479	50.5582	51.5998			126.18	44.6186	44.2629	48.1597	49.83	49.5274	49.3567	48.7929	49.8948			126.18	43.357	47.5196	50.3989	50.7626	49.7454	48.6864	47.7272	49.3338
126.28	46.4111	45.9379	49.805	50.7872	50.0876	50.6276	50.5347	51.5836			126.28	44.603	44.2414	48.1507	49.815	49.4931	49.3396	48.757	49.8834			126.28	43.3348	47.5196	50.3592	50.744	49.7231	48.6471	47.7131	49.294
126.38	46.3527	45.9201	49.8069	50.7847	50.0847	50.613	50.5112	51.5628			126.38	44.6075	44.2529	48.1315	49.7839	49.4954	49.2917	48.739	49.8491			126.38	43.3156	47.4753	50.3355	50.7226	49.7231	48.6501	47.707	49.294
126.48	46.3674	45.8907	49.8033	50.7634	50.0627	50.604	50.4796	51.5666			126.48	44.585	44.2372	48.1187	49.7667	49.4931	49.3008	48.7054	49.8203			126.48	43.2771	47.4753	50.3007	50.704	49.6859	48.6282	47.6837	49.2974
126.58	46.3527	45.8939	49.7826	50.7432	50.0369	50.5805	50.4747	51.5342			126.58	44.585	44.2031	48.1033	49.7724	49.4508	49.2576	48.6975	49.8227			126.58	43.2771	47.4363	50.2912	50.6941	49.6709	48.592	47.6449	49.3027
126.68	46.3344	45.8761	49.7619	50.7169	50.0185	50.5561	50.4577	51.5257			126.68	44.585	44.1846	48.0828	49.7724	49.419	49.2633	48.6695	49.8089			126.68	43.2771	47.4043	50.2691	50.6726	49.6486	48.5685	47.6292	49.294
126.78	46.3344	45.8552	49.7511	50.7025	50.0156	50.5309	50.426	51.5087			126.78	44.5252	44.1632	48.0547	49.7588	49.4109	49.229	48.6525	49.7974			126.78	43.2549	47.36	50.2485	50.6512	49.6486	48.5292	47.606	49.2592
126.88	46.3417	45.8362	49.736	50.6814	49.9706	50.5196	50.422	51.4933			126.88	44.5184	44.1802	48.0355	49.7265	49.3813	49.2005	48.6279	49.786			126.88	43.2131	47.3813	50.2327	50.5841	49.6114	48.5087	47.564	49.2472
126.98	46.3162	45.8299	49.7	50.6754	49.9539	50.483	50.3984	51.4878			126.98	44.4739	44.1703	48.006	49.723	49.3618	49.172	48.5852	49.7515			126.98	43.2131	47.3813	50.209	50.5827	49.5743	48.4898	47.5718	49.2245
127.08	46.2816	45.7996	49.6883	50.6559	49.9309	50.4855	50.379	51.4639			127.08	44.5007	44.149	47.9908	49.7115	49.3333	49.172	48.5627	49.7229			127.08	43.1811	47.3954	50.2059	50.5485	49.5518	48.4506	47.5781	49.2281
127.18	46.2615	45.789	49.6767	50.6195	49.9189	50.4595	50.349	51.4546			127.18	44.5073	44.149	47.9715	49.6977	49.2956	49.1572	48.5683	49.6943			127.18	43.1811	47.3954	50.1725	50.5085	49.5369	48.4349	47.5439	49.1863
127.28	46.2832	45.7692	49.6497	50.6178	49.8875	50.4465	50.3426	51.4338			127.28	44.456	44.1133	47.9498	49.6725	49.2647	49.1013	48.5369	49.6829			127.28	43.1811	47.3688	50.1537	50.4898	49.4968	48.4081	47.5439	49.1587
127.38	46.2542	45.742	49.6417	50.5924	49.8498	50.4254	50.3133	51.4175			127.38	44.4184	44.092	47.9241	49.6828	49.2681	49.0694	48.5369	49.6541			127.38	43.1811	47.3475	50.133	50.4557	49.4729	48.3876	47.5392	49.1898
127.48	46.2194	45.7387	49.6346	50.5712	49.8323	50.3921	50.2785	51.406			127.48	44.3959	44.092	47.9012	49.661	49.2419	49.0522	48.5211	49.637			127.48	43.1332	47.298	50.1298	50.4542	49.4404	48.3516	47.5207	49.143
127.58	46.2156	45.7073	49.6004	50.5543	49.8157	50.3652	50.2591	51.3743			127.58	44.3959	44.0677	47.8973	49.6518	49.2304	49.0238	48.4864	49.6084			127.58	43.1332	47.3191	50.0903	50.437	49.4404	48.3216	47.5097	49.1516
127.68	46.2376	45.679	49.5879	50.5288	49.8129	50.345	50.238	51.3534			127.68	44.3805	44.092	47.8884	49.6403	49.2168	49.0022	48.4539	49.6026			127.68	43.1332	47.298	50.0666	50.3844	49.4253	48.2667	47.4817	49.1292
127.78	46.1939	45.6487	49.587	50.5204	49.7853	50.3336	50.2047	51.3256			127.78	44.3848	44.0706	47.8884	49.6231	49.1848	48.9804	48.428	49.5739			127.78	43.1332	47.2589	50.0239	50.3756	49.403	48.2383	47.4584	49.1116
127.88	46.1427	45.6497	49.543	50.4933	49.7705	50.3043	50.1958	51.2963			127.88	44.3626	44.0449	47.8563	49.5942	49.1699	48.961	48.4112	49.5453			127.88	43.1233	47.2535	50.0271	50.3586	49.3807	48.2226	47.4475	49.1116
127.98	46.1574	45.6287	49.5287	50.4695	49.7558	50.2825	50.1626	51.2847			127.98	44.3292	43.9994	47.8371	49.5863	49.1563	48.9417	48.383	49.5281			127.98	43.1332	47.2269	50.0271	50.3444	49.3584	48.2258	47.4352	49.0892
128.08	46.1682	45.6109	49.5089	50.4644	49.7282	50.2808	50.1562	51.2623			128.08	44.356	44.0165	47.8244	49.5598	49.1449	48.9063	48.3359	49.4995			128.08	43.1332	47.2092	50.0032	50.3257	49.3213	48.2226	47.4584	49.0736
128.18	46.1701	45.6194	49.4955	50.4442	49.7116	50.2581	50.1269	51.2399			128.18	44.3025	44.0065	47.7898	49.5483	49.1162	48.887	48.3179	49.5052			128.18	43.1332	47.1826	49.9874	50.3086	49.3062	48.2069	47.4352	49.037
128.28	46.192	45.6109	49.4865	50.4298	49.6775	50.2297	50.0954	51.2168			128.28	44.2959	43.9851	47.7412	49.5311	49.0899	48.8721	48.2966	49.4593			128.28	43.1008	47.1826	49.948	50.2729	49.2839	48.1707	47.3964	49.0372
128.38	46.1628	45.5795	49.4712	50.4104	49.6572	50.2378	50.0516	51.1959			128.38	44.2626	43.9496	47.7412	49.5103	49.0854	48.8527	48.2539	49.4307			128.38	43.1492	47.186	49.967	50.2587	49.2468	48.1802	47.3807	49.0077
128.48	46.1427	45.5815	49.4488	50.412	49.6388	50.2053	50.0386	51.1766			128.48	44.2179	43.9609	47.6951	49.4907	49.0614	48.8356	48.2259	49.4021			128.48	43.1008	47.1436	49.9559	50.2015	49.2319	48.1566	47.3761	48.9903
128.58	46.1499	45.5774	49.4343	50.3984	49.6148	50.1785	50.0337	51.1666			128.58	44.2179	43.9325	47.6619	49.4735	49.0477	48.8072	48.1753	49.3848			128.58	43.1008	47.1524	49.9322	50.1658	49.2319	48.1361	47.3652	48.9641
128.68	46.1062	45.5691	49.403	50.3637	49.601	50.1485	49.9989	51.1349			128.68	44.2179	43.9452	47.6452	49.4217	49.0284	48.79	48.1473	49.3676			128.68	43.0627	47.1649	49.9322	50.1658	49.2096	48.1315	47.3574	48.9468
128.78	46.0842	45.5586	49.3832	50.346	49.5697	50.1468	49.9697	51.1264			128.78	44.2179	43.9068	47.626	49.4045	49.0135	48.7707	48.1361	49.3528			128.78	42.9664	47.1595	49.8848	50.113	49.2125	48.1472	47.3419	48.9381
128.88	46.066	45.5271	49.377	50.3155	49.5438	50.1119	49.9494	51.1179			128.88	44.1845	43.8756	47.6132	49.4023	48.9985	48.7444	48.1046	49.3619			128.88	42.925	47.1649	49.8815	50.0659	49.2096	48.0939	47.3606	48.8948
128.98	46.0422	45.5083	49.3564	50.2985	49.53	50.0981	49.9129	51.0886			128.98	44.1845	43.8712	47.562	49.3758	48.9735	48.7295	48.0833	49.3276			128.98	42.925	47.1506	49.8451	50.0344	49.1946	48.1047	47.3419	48.8688
129.08	46.0422	45.4905	49.3429	50.2698	49.507	50.0851	49.9024	51.0685			129.08	44.2068	43.867	47.5492	49.3586	48.9678	48.6738	48.0462	49.3162			129.08	42.925	47.1383	49.8214	50.0089	49.1395	48.0812	47.3374	48.8775
129.18	46.0094	45.4726	49.3286	50.2621	49.4839	50.0648	49.8764	51.0546			129.18	44.1845	43.857	47.5403	49.324	48.9427	48.6669	48.0372	49.2989			129.18	42.925	47.1204	49.8056	49.973	49.1129	48.0655	47.331	48.8515
129.28	46.0057	45.4517	49.2962	50.2156	49.4701	50.025	49.8683	51.0376			129.28	44.1845	43.857	47.5082	49.3125	48.9358	48.6589	48.0125	49.2702			129.28	42.877	47.0938	49.7819	49.9588	49.0755	48.0655	47.3264	48.7873
129.38	45.9874	45.4297	49.2782	50.2011	49.4452	50.0047	49.8319	51.0183			129.38	44.1512	43.8214	47.4917	49.2838	48.8969	48.6167	47.9676	49.2588			129.38	42.8512	47.0938	49.7534	49.9089	49.0934	48.0498	47.3032	48.8028
129.48	45.9802	45.414	49.2549	50.18	49.4259	49.9933	49.8181	50.9873			129.48	44.1512	43.7786	47.4431	49.2458	48.8958	48.5677	47.9338	49.2245			129.48	42.861	47.0548	49.7106	49.8875	49.0831	48.0263	47.3032	48.761
129.58	45.951	45.4045	49.2236	50.1723	49.4121	49.9519	49.8132	50.9774			129.58	44.1558	43.7644	47.4431	49.2401	48.8708	48.5643	47.9226	49.213			129.58	42.861	47.0709	49.7155	49.8517	49.0607	48.0025	47.2642	48.7126
129.68	45.951	45.3962	49.2003	50.1394	49.3881	49.9405	49.789	50.9627			129.68	44.1447	43.7431	47.4123	49.2148	48.8535	48.5449	47.8946	49.1843			129.68	42.861	47.0371	49.7218	49.8446	49.0355	47.9868	47.2487	48.6864
129.78	45.9309	45.3805	49.1858	50.1147	49.3568	49.9153	49.759	50.9356			129.78	44.1356	43.7288	47.3636	49.1975	48.8456	48.5163	47.8666	49.1843			129.78	42.8126	47.053	49.6837	49.8132	49.0235	47.9633	47.2409	48.6691
129.88	45.9143	45.3437	49.1427	50.0927	49.3568	49.8991	49.7411	50.9093			129.88	44.1401	43.7075	47.3444	49.155	48.8079	48.4902	47.8362	49.1695			129.88	42.8126	47.0318	49.7027	49.7876	49.0012	47.976	47.2409	48.6691
129.98	45.9108	45.3354	49.1293	50.075	49.3347	49.8763	49.7184	50.8994			129.98	44.1068	43.6933	47.3176	49.14	48.7965	48.4708	47.8048	49.1305			129.98	42.8446	47.0496	49.6632	49.7519	48.9789	47.9554	47.2254	48.6395
130.08	45.8652	45.3039	49.0854	50.0445	49.3117	49.8471	49.6982	50.8824			130.08	44.1111	43.6718	47.287	49.1228	48.7794	48.4514	47.7767	49.1236			130.08	42.7745	47.0496	49.6474	49.7375	48.9416	47.9397	47.2022	48.6257
130.18	45.8322	45.2914	49.0674	50.0208	49.3043	49.8244	49.6811	50.8623			130.18	44.1179	43.6576	47.2779	49.0974	48.7508	48.4366	47.7598	49.0961			130.18	42.7647	47.0496	49.6474	49.7161	48.9595	47.9162	47.2177	48.612
130.28	45.8542	45.2683	49.0377	50.0055	49.2923	49.8033	49.6682	50.8384			130.28	44.0578	43.6362	47.2676	49.0768	48.7336	48.4251	47.7318	49.0721			130.28	42.7167	47.0318	49.6396	49.7019	48.9416	47.9162	47.1835	48.5649
130.38	45.8448	45.242	49.0108	49.9682	49.2785	49.7805	49.6276	50.8183			130.38	44.0689	43.6362	47.2332	49.048	48.7051	48.4001	47.7037	49.0159			130.38	42.6848	47.0318	49.6157	49.6662	48.9267	47.9005	47.1867	48.5702
130.48	45.8231	45.2233	48.9812	49.9572	49.249	49.7594	49.613	50.7843			130.48	44.0398	43.6063	47.1974	49.0446	48.6902	48.3796	47.6666	48.9873			130.48	42.6848	47.0053	49.5999	49.6447	48.8599	47.8768	47.1479	48.5424
130.58	45.7738	45.22	48.9642	49.9513	49.226	49.7261	49.613	50.7711			130.58	44.0398	43.5865	47.1934	49.0537	48.6937	48.3647	47.6307	48.9723			130.58	42.6848	46.9873	49.5999	49.609	48.8479	47.9035	47.1399	48.5164
130.68	45.7719	45.2076	48.9301	49.9293	49.2057	49.7213	49.5862	50.7402			130.68	44.0176	43.5723	47.1718	49.0193	48.656	48.3305	47.6375	48.9437			130.68	42.6368	46.9608	49.5476	49.5877	48.8151	47.8846	47.1012	48.5093
130.78	45.792	45.1688	48.8915	49.9124	49.1752	49.7042	49.5628	50.7325			130.78	44.0265	43.5365	47.1525	49.0159	48.6366	48.3111	47.6251	48.915			130.78	42.6048	46.9431	49.5446	49.5877	48.7928	47.8846	47.0966	48.4818
130.88	45.781	45.1394	48.887	49.8895	49.1633	49.6855	49.54	50.6962			130.88	44.0467	43.5052	47.1205	48.9676	48.6171	48.2917	47.588	48.8978			130.88	42.6048	46.9431	49.5051	49.5833	48.8002	47.8846	47.1089	48.492
130.98	45.7499	45.1133	48.843	49.8877	49.1394	49.6628	49.5133	50.6591			130.98	44	43.4797	47.1078	48.933	48.6	48.2827	47.5465	48.86			130.98	42.6368	46.9165	49.5051	49.5562	48.7779	47.8611	47.0857	48.4696
131.08	45.7499	45.1101	48.8089	49.8573	49.1153	49.6465	49.502	50.6429			131.08	43.9954	43.4583	47.0758	48.9077	48.5647	48.2348	47.5297	48.829			131.08	42.5884	46.8774	49.4812	49.5305	48.7749	47.8454	47.0702	48.4296
131.18	45.7225	45.0765	48.7757	49.8471	49.1052	49.6254	49.489	50.6036			131.18	43.9911	43.4439	47.0719	48.8871	48.5623	48.2028	47.5185	48.8004			131.18	42.627	46.8454	49.4654	49.4948	48.7556	47.8643	47.0236	48.4087
131.28	45.7225	45.0724	48.7569	49.8455	49.0766	49.606	49.4712	50.5742			131.28	44.0176	43.3971	47.0246	48.8561	48.5452	48.1914	47.4903	48.758			131.28	42.6048	46.8633	49.4417	49.4977	48.7183	47.8265	47.0002	48.4087
131.38	45.7373	45.021	48.7282	49.8234	49.0463	49.5775	49.4696	50.5487			131.38	43.9843	43.3728	47.0246	48.8434	48.5258	48.1879	47.4735	48.7397			131.38	42.595	46.8579	49.4545	49.5233	48.696	47.8408	46.9847	48.3445
131.48	45.719	45.0158	48.6815	49.7819	49.0232	49.5743	49.4444	50.5248			131.48	43.9575	43.3672	47.0028	48.8296	48.4995	48.163	47.4623	48.7259			131.48	42.6048	46.8454	49.4211	49.4806	48.6811	47.8454	46.9692	48.3445
131.58	45.6805	44.9927	48.6672	49.7582	49.0094	49.5459	49.4265	50.5101			131.58	43.951	43.33	46.9862	48.8123	48.4824	48.1344	47.4342	48.6973			131.58	42.6048	46.8454	49.3832	49.4592	48.6768	47.8062	46.9459	48.3567
131.68	45.6587	44.979	48.634	49.7498	48.9845	49.5044	49.4128	50.4762			131.68	43.9288	43.2945	46.9887	48.7698	48.4619	48.0922	47.4005	48.6549			131.68	42.6208	46.8277	49.3785	49.4162	48.6932	47.8062	46.9304	48.3134
131.78	45.6531	44.9592	48.6187	49.7218	48.956	49.4825	49.3893	50.4661			131.78	43.8954	43.2731	46.9389	48.7548	48.4446	48.0718	47.3724	48.6366			131.78	42.5823	46.8277	49.3546	49.3949	48.6589	47.7905	46.9226	48.2871
131.88	45.6094	44.9487	48.6115	49.7142	48.9403	49.4622	49.3699	50.4236			131.88	43.9219	43.2518	46.9222	48.7168	48.4196	48.0432	47.3691	48.6113			131.88	42.5245	46.8154	49.3388	49.3806	48.6246	47.751	46.8837	48.2612
131.98	45.6038	44.9267	48.5775	49.6794	48.9081	49.4297	49.3463	50.4213			131.98	43.8954	43.2376	46.8902	48.6974	48.3774	48.041	47.3309	48.5827			131.98	42.5245	46.8011	49.3516	49.3735	48.6112	47.7402	46.8604	48.2698
132.08	45.5893	44.9372	48.5406	49.6735	48.8804	49.394	49.3309	50.4082			132.08	43.8954	43.2161	46.8812	48.6685	48.343	48.0261	47.286	48.5827			132.08	42.5245	46.7746	49.3184	49.3379	48.5769	47.7229	46.8449	48.2178
132.18	45.6003	44.9173	48.5208	49.6523	48.8472	49.3761	49.3034	50.3796			132.18	43.8729	43.1849	46.8711	48.6652	48.3283	47.9976	47.2546	48.554			132.18	42.5245	46.7923	49.2994	49.3165	48.5844	47.704	46.8216	48.2005
132.28	45.5764	44.8963	48.5083	49.6185	48.8353	49.3469	49.2847	50.3557			132.28	43.8729	43.1763	46.8517	48.6663	48.2996	47.9805	47.2377	48.5368			132.28	42.5245	46.7568	49.2994	49.302	48.5621	47.6883	46.8061	48.1952
132.38	45.5764	44.8722	48.5101	49.6016	48.8113	49.316	49.2758	50.3402			132.38	43.8131	43.1548	46.8352	48.6375	48.2849	47.9805	47.2007	48.5082			132.38	42.4765	46.7303	49.2994	49.2807	48.5472	47.649	46.7906	48.1832
132.48	45.5764	44.869	48.4733	49.5761	48.7855	49.2957	49.2507	50.3178			132.48	43.7841	43.1166	46.8198	48.6363	48.2711	47.9633	47.204	48.4796			132.48	42.5023	46.7035	49.2961	49.2664	48.5249	47.6253	46.7797	48.1396
132.58	45.5582	44.8481	48.4697	49.5448	48.7754	49.273	49.2239	50.2908			132.58	43.7841	43.095	46.7879	48.6226	48.2334	47.9394	47.1759	48.4623			132.58	42.4831	46.6824	49.252	49.245	48.4758	47.6018	46.7594	48.1258
132.68	45.5399	44.8313	48.4563	49.5397	48.7302	49.2511	49.1915	50.2862			132.68	43.7841	43.0852	46.7751	48.6111	48.2312	47.9268	47.1591	48.4509			132.68	42.5245	46.6326	49.2392	49.2522	48.4356	47.605	46.7439	48.0927
132.78	45.5126	44.8166	48.4374	49.5143	48.7164	49.2226	49.1794	50.2576			132.78	43.7841	43.0566	46.7558	48.5938	48.2025	47.9235	47.131	48.4223			132.78	42.4765	46.6149	49.236	49.2308	48.4177	47.5704	46.7206	48.027
132.88	45.485	44.8093	48.4141	49.4939	48.6759	49.2023	49.1388	50.236			132.88	43.7841	43.0168	46.7238	48.5732	48.1854	47.8836	47.1029	48.3879			132.88	42.4446	46.5884	49.2202	49.2421	48.3805	47.5468	46.7206	48.027
132.98	45.4979	44.778	48.4052	49.4787	48.6437	49.1902	49.1282	50.2082			132.98	43.7883	42.9953	46.7007	48.5249	48.1569	47.8574	47.0726	48.3592			132.98	42.4446	46.5706	49.1965	49.2236	48.3716	47.5311	46.7161	48.0148
133.08	45.4668	44.7632	48.3916	49.4661	48.615	49.1585	49.1031	50.1958			133.08	43.7351	42.9811	46.6765	48.5077	48.1546	47.8436	47.0411	48.357			133.08	42.4446	46.5438	49.1807	49.1878	48.3388	47.5358	46.6819	47.9748
133.18	45.4485	44.7464	48.3826	49.455	48.6012	49.1374	49.0959	50.1649			133.18	43.6949	42.9654	46.6598	48.4788	48.1226	47.838	47.0434	48.3328			133.18	42.4187	46.5298	49.138	49.205	48.3359	47.5076	46.6586	47.9488
133.28	45.4268	44.7328	48.3692	49.4432	48.5652	49.1049	49.078	50.1495			133.28	43.6883	42.9669	46.6278	48.4673	48.0941	47.8095	47.0278	48.3191			133.28	42.4126	46.4996	49.1205	49.1878	48.3121	47.4839	46.6429	47.9523
133.38	45.3756	44.7255	48.3468	49.4364	48.5606	49.0878	49.0537	50.1294			133.38	43.6684	42.9284	46.5959	48.4329	48.0827	47.7981	46.9984	48.2904			133.38	42.3966	46.4996	49.1363	49.1622	48.2942	47.4603	46.6041	47.9141
133.48	45.3482	44.7014	48.3334	49.3957	48.5524	49.0683	49.0472	50.1193			133.48	43.6217	42.91	46.6113	48.4214	48.0542	47.7809	46.9739	48.2423			133.48	42.3966	46.473	49.111	49.1379	48.2794	47.4573	46.6167	47.8881
133.58	45.3445	44.6857	48.3198	49.3881	48.5054	49.0285	49.0342	50.0907			133.58	43.6171	42.8887	46.5831	48.3926	48.0369	47.7638	46.9569	48.2446			133.58	42.3646	46.4764	49.0699	49.1023	48.2302	47.4368	46.6041	47.9019
133.68	45.3335	44.6763	48.2812	49.3712	48.4934	49.0293	49.0108	50.08			133.68	43.5616	42.8858	46.5613	48.3846	48.0198	47.7616	46.9401	48.2275			133.68	42.3163	46.4819	49.0462	49.0923	48.2049	47.3976	46.5654	47.8741
133.78	45.3024	44.6574	48.2795	49.3382	48.4814	49.0066	49.0132	50.0591			133.78	43.5616	42.8772	46.5255	48.3615	47.9913	47.7375	46.9289	48.1896			133.78	42.3163	46.4641	48.9907	49.1023	48.2123	47.3581	46.5186	47.8672
133.88	45.3024	44.6312	48.2642	49.3288	48.4667	48.9839	49.0026	50.0205			133.88	43.5348	42.853	46.5127	48.3409	47.9799	47.724	46.9289	48.1873			133.88	42.2363	46.4376	48.9907	49.0638	48.1454	47.3346	46.5031	47.8446
133.98	45.2531	44.6049	48.2391	49.3204	48.4427	48.9587	48.9751	50.0081			133.98	43.5325	42.8388	46.4935	48.3121	47.9628	47.7069	46.8873	48.1851			133.98	42.2363	46.4074	48.9513	49.0451	48.1126	47.2953	46.4876	47.8081
134.08	45.2512	44.5925	48.2301	49.3111	48.4141	48.9416	48.9467	49.985			134.08	43.5394	42.8417	46.4616	48.2948	47.9341	47.7046	46.8694	48.1701			134.08	42.2843	46.4108	48.9545	49.0124	48.126	47.2718	46.4831	47.815
134.18	45.2295	44.5599	48.2113	49.2899	48.4086	48.9189	48.9353	49.9495			134.18	43.5058	42.8074	46.4486	48.2834	47.9033	47.6989	46.8313	48.1622			134.18	42.2044	46.3576	48.9355	48.9952	48.0978	47.2559	46.4675	47.8013
134.28	45.2021	44.5546	48.2014	49.2822	48.3875	48.8977	48.924	49.9178			134.28	43.5058	42.8032	46.4206	48.2719	47.8714	47.6635	46.811	48.1358			134.28	42.2044	46.3665	48.896	48.9594	48.0709	47.2513	46.4147	47.7753
134.38	45.1654	44.5243	48.1969	49.25	48.3782	48.8807	48.8883	49.9131			134.38	43.5015	42.789	46.4103	48.2683	47.8599	47.6441	46.7998	48.1244			134.38	42.1179	46.3399	48.8532	48.938	48.0561	47.2199	46.4101	47.7388
134.48	45.1654	44.5191	48.1853	49.2289	48.3432	48.8515	48.8673	49.8853			134.48	43.4881	42.8032	46.3936	48.2339	47.8314	47.6214	46.783	48.107			134.48	42.1084	46.3009	48.8089	48.9309	48.0189	47.2088	46.3711	47.7544
134.58	45.1654	44.5023	48.1664	49.2035	48.3257	48.8272	48.8527	49.8699			134.58	43.4724	42.7819	46.3784	48.2028	47.8143	47.6041	46.7548	48.0784			134.58	42.0761	46.2689	48.7931	48.9166	47.9964	47.201	46.3665	47.7804
134.68	45.138	44.4971	48.143	49.2018	48.3138	48.8142	48.8324	49.8576			134.68	43.4992	42.7819	46.3656	48.1603	47.8029	47.5757	46.7548	48.067			134.68	42.0281	46.2689	48.7694	48.9238	47.9741	47.1775	46.3556	47.7317
134.78	45.138	44.4614	48.1475	49.1671	48.3017	48.7744	48.808	49.8328			134.78	43.4571	42.7576	46.3463	48.1281	47.7744	47.5506	46.738	48.0498			134.78	42.1146	46.2511	48.7725	48.9053	47.937	47.1382	46.3324	47.7144
134.88	45.0924	44.4583	48.1466	49.1501	48.2787	48.7637	48.8048	49.8135			134.88	43.428	42.7604	46.3335	48.1109	47.7663	47.5302	46.71	48.0327			134.88	42.0924	46.2105	48.7139	48.8923	47.9519	47.1223	46.3091	47.6884
134.98	45.0651	44.4405	48.1206	49.1069	48.2317	48.7435	48.7781	49.8004			134.98	43.3947	42.7077	46.3297	48.0936	47.7217	47.5039	46.6818	48.0327			134.98	42.0924	46.2069	48.6902	48.881	47.8848	47.0988	46.2858	47.7093
135.08	45.0651	44.4425	48.091	49.0951	48.2326	48.7192	48.7644	49.7788			135.08	43.3947	42.7035	46.3016	48.0535	47.6887	47.4823	46.6818	47.9834			135.08	42.0441	46.2105	48.6665	48.881	47.8625	47.0831	46.2701	47.6711
135.18	45.0504	44.408	48.091	49.0765	48.2215	48.6923	48.7351	49.7533			135.18	43.4012	42.6565	46.2848	48.0246	47.6807	47.4731	46.6538	47.9753			135.18	42.006	46.1678	48.6271	48.8596	47.8402	47.0439	46.2314	47.6451
135.28	45.056	44.3985	48.0623	49.057	48.2123	48.6801	48.7051	49.7386			135.28	43.3878	42.6536	46.2696	48.0212	47.6543	47.4674	46.6425	47.9467			135.28	41.9961	46.0915	48.6238	48.8238	47.8031	47.0328	46.2206	47.6191
135.38	45.034	44.3776	48.0435	49.0409	48.1736	48.6591	48.7036	49.7123			135.38	43.3346	42.6536	46.267	48.0131	47.6372	47.4389	46.6145	47.9353			135.38	41.974	46.0649	48.6032	48.8096	47.8031	46.9966	46.2081	47.6017
135.48	45.0284	44.3608	48.0524	49.0299	48.1727	48.6355	48.6808	49.6923			135.48	43.3614	42.6565	46.2351	47.9844	47.5973	47.4411	46.5976	47.918			135.48	41.9801	46.0472	48.5827	48.8054	47.8179	46.973	46.1848	47.5842
135.58	45.001	44.3482	48.039	49.0129	48.1414	48.6151	48.6606	49.6953			135.58	43.3614	42.6393	46.212	47.9763	47.5801	47.4276	46.583	47.918			135.58	41.9801	46.0738	48.5288	48.7953	47.8031	46.9338	46.1816	47.5929
135.68	45.001	44.3367	48.0354	49.0003	48.1294	48.5859	48.6419	49.6714			135.68	43.3614	42.6082	46.2146	47.9615	47.5516	47.3989	46.5606	47.9065			135.68	41.9322	46.0207	48.5005	48.754	47.7539	46.9181	46.1459	47.5842
135.78	44.9884	44.3357	48.0282	48.9765	48.1267	48.5769	48.6217	49.6606			135.78	43.3277	42.5825	46.1992	47.9498	47.5345	47.3989	46.5392	47.8756			135.78	41.9002	46.0029	48.4608	48.7268	47.7183	46.8946	46.1226	47.5582
135.88	44.9774	44.322	48.0013	48.9579	48.1064	48.5558	48.6224	49.6398			135.88	43.3277	42.5825	46.1864	47.9097	47.506	47.3705	46.5303	47.8436			135.88	41.9002	45.9621	48.4292	48.6926	47.6914	46.8662	46.1226	47.5011
135.98	44.9957	44.3084	47.986	48.9519	48.0926	48.5486	48.59	49.6336			135.98	43.3545	42.5611	46.1774	47.9016	47.4773	47.3705	46.5135	47.8401			135.98	41.8522	45.9584	48.3928	48.7096	47.6691	46.8238	46.0993	47.4853
136.08	44.9608	44.3074	47.9717	48.941	48.0658	48.5185	48.5705	49.6166			136.08	43.3457	42.5425	46.1481	47.8889	47.4602	47.3328	46.5021	47.8126			136.08	41.8199	45.9407	48.35	48.6954	47.6868	46.8127	46.0791	47.4715
136.18	44.9699	44.2801	47.9672	48.9147	48.0593	48.49	48.5479	49.6027			136.18	43.3388	42.5568	46.1351	47.8729	47.4488	47.302	46.4685	47.8115			136.18	41.8199	45.9282	48.3263	48.6597	47.6543	46.8002	46.0916	47.428
136.28	44.9737	44.2644	47.9367	48.891	48.0465	48.4836	48.5325	49.5826			136.28	43.2879	42.554	46.093	47.8717	47.4374	47.2736	46.4405	47.7862			136.28	41.7719	45.8876	48.2869	48.6553	47.6318	46.764	46.0451	47.428
136.38	44.9463	44.2424	47.9205	48.8817	47.9986	48.4568	48.5082	49.5795			136.38	43.2833	42.5325	46.0713	47.8406	47.403	47.2701	46.4292	47.7862			136.38	41.7719	45.8556	48.2711	48.6625	47.5946	46.7216	46.0248	47.4107
136.48	44.9316	44.2204	47.9187	48.8605	47.9977	48.4195	48.4969	49.5602			136.48	43.2833	42.5085	46.0713	47.8291	47.3826	47.2542	46.4123	47.7576			136.48	41.7719	45.8254	48.2662	48.6455	47.5798	46.698	45.9906	47.402
136.58	44.8823	44.2099	47.9151	48.8224	47.9802	48.4161	48.4644	49.5548			136.58	43.3055	42.5112	46.0392	47.8004	47.3655	47.2279	46.4011	47.7462			136.58	41.692	45.8254	48.2474	48.6312	47.5575	46.6713	45.9751	47.3847
136.68	44.8769	44.1984	47.9026	48.8012	47.9653	48.3918	48.4514	49.5262			136.68	43.2565	42.4727	46.0264	47.7832	47.3517	47.1994	46.373	47.721			136.68	41.692	45.7954	48.2077	48.6097	47.5201	46.6383	45.9286	47.3587
136.78	44.8605	44.1733	47.8739	48.78	47.9406	48.3878	48.419	49.5138			136.78	43.2278	42.4543	45.9918	47.7544	47.306	47.1824	46.3595	47.7117			136.78	41.66	45.7811	48.184	48.5784	47.5053	46.6447	45.9238	47.3327
136.88	44.8367	44.1533	47.8514	48.7588	47.9174	48.3707	48.4142	49.4891			136.88	43.1944	42.4713	46.0034	47.751	47.306	47.1539	46.3506	47.6831			136.88	41.612	45.7545	48.1682	48.5526	47.483	46.6115	45.8896	47.35
136.98	44.8514	44.147	47.8505	48.7351	47.9036	48.3675	48.3987	49.4683			136.98	43.1944	42.487	45.9753	47.7429	47.2637	47.1253	46.3191	47.6682			136.98	41.5637	45.7279	48.1445	48.5313	47.4681	46.5755	45.8556	47.3325
137.08	44.8586	44.123	47.8308	48.7208	47.8834	48.3439	48.3906	49.4559			137.08	43.1944	42.4685	45.9753	47.7211	47.2319	47.1196	46.2944	47.6545			137.08	41.5317	45.71	48.1048	48.517	47.431	46.5331	45.8305	47.31
137.18	44.8219	44.079	47.7976	48.6996	47.8548	48.3366	48.3615	49.4358			137.18	43.1765	42.4543	45.9625	47.6912	47.2203	47.1424	46.2664	47.6258			137.18	41.4837	45.6977	48.0811	48.4954	47.3908	46.5174	45.8353	47.2718
137.28	44.8184	44.0705	47.785	48.6996	47.8345	48.326	48.3396	49.4018			137.28	43.1053	42.4499	45.933	47.6705	47.1953	47.1139	46.2405	47.6281			137.28	41.4518	45.6834	48.0781	48.4485	47.3713	46.4701	45.7965	47.2458
137.38	44.7911	44.0569	47.7546	48.6657	47.8079	48.3147	48.3266	49.398			137.38	43.1053	42.4543	45.9112	47.6509	47.1861	47.0968	46.2438	47.6143			137.38	41.4038	45.6782	48.0811	48.4242	47.3342	46.4308	45.7856	47.2285
137.48	44.7637	44.0475	47.724	48.6217	47.7792	48.2968	48.2901	49.3602			137.48	43.0831	42.423	45.9215	47.6566	47.1519	47.0547	46.2158	47.5857			137.48	41.41	45.6428	48.0416	48.3884	47.3119	46.4103	45.7731	47.1852
137.58	44.738	44.0276	47.7141	48.6081	47.7599	48.2862	48.2584	49.3579			137.58	43.0831	42.4357	45.9112	47.6394	47.1313	47.0364	46.199	47.5571			137.58	41.3333	45.6214	48.0258	48.3884	47.297	46.3995	45.7343	47.1556
137.68	44.7308	44.0024	47.6819	48.5962	47.7424	48.261	48.2537	49.3362			137.68	43.0563	42.4401	45.8894	47.6394	47.1175	47.0227	46.171	47.5398			137.68	41.3239	45.5949	48.0021	48.3969	47.2894	46.3443	45.6878	47.133
137.78	44.7034	43.9919	47.6603	48.5725	47.711	48.2457	48.2269	49.3161			137.78	43.101	42.4186	45.8883	47.6244	47.1004	47.0056	46.1654	47.5205			137.78	41.2755	45.5772	48.0052	48.377	47.2523	46.3365	45.6955	47.1156
137.88	44.6943	43.9763	47.6433	48.5446	47.6907	48.2237	48.2026	49.3169			137.88	43.1053	42.3973	45.8729	47.6279	47.0719	46.9772	46.1541	47.4941			137.88	41.2821	45.5504	47.9861	48.3527	47.242	46.313	45.6955	47.0723
137.98	44.6997	43.9584	47.611	48.5345	47.6595	48.2034	48.1944	49.3169			137.98	43.1053	42.3831	45.8601	47.5854	47.0719	46.9486	46.126	47.4676			137.98	41.3399	45.5238	47.9436	48.3171	47.2077	46.2973	45.6488	47.067
138.08	44.6686	43.9447	47.5993	48.5327	47.6567	48.1831	48.1742	49.2884			138.08	43.0386	42.3945	45.841	47.5785	47.0684	46.9201	46.1428	47.4367			138.08	41.3399	45.5504	47.942	48.2957	47.1704	46.2548	45.6333	47.0323
138.18	44.6723	43.9238	47.5588	48.5218	47.6327	48.1628	48.162	49.2521			138.18	43.0876	42.3831	45.8064	47.5532	47.0548	46.8916	46.107	47.4195			138.18	41.2915	45.547	47.923	48.2741	47.1555	46.2343	45.6226	46.9994
138.28	44.6047	43.9007	47.5374	48.4921	47.6107	48.1328	48.1336	49.2474			138.28	43.0765	42.3404	45.7897	47.5417	47.0126	46.863	46.0979	47.4253			138.28	41.2915	45.5238	47.9072	48.2599	47.1555	46.1761	45.6055	46.9854
138.38	44.5991	43.8767	47.506	48.4667	47.5783	48.1157	48.1134	49.2367			138.38	42.9962	42.3404	45.7859	47.5072	47.0114	46.8552	46.0811	47.3967			138.38	41.2915	45.5204	47.8835	48.2429	47.1511	46.1242	45.5945	46.9645
138.48	44.6029	43.8546	47.4915	48.4583	47.5609	48.1035	48.0794	49.2266			138.48	43.0429	42.336	45.7769	47.5072	46.9977	46.846	46.053	47.3931			138.48	41.2915	45.4829	47.8677	48.2371	47.1183	46.1039	45.5713	46.9161
138.58	44.5809	43.8557	47.4764	48.4303	47.5397	48.0743	48.0721	49.2073			138.58	43.0275	42.3262	45.7666	47.5072	46.9863	46.8289	46.0249	47.3943			138.58	41.2915	45.4493	47.8438	48.2071	47.1183	46.0693	45.5558	46.8726
138.68	44.5956	43.8243	47.47	48.4261	47.5167	48.0386	48.0607	49.1934			138.68	43.023	42.2905	45.7641	47.4853	46.9554	46.7912	46.0417	47.3565			138.68	41.2595	45.453	47.828	48.1886	47.1035	46.0536	45.5448	46.8675
138.78	44.5774	43.8034	47.4288	48.4167	47.4688	48.0263	48.0388	49.1879			138.78	43.0429	42.2691	45.7514	47.4554	46.9611	46.7718	46.0361	47.3336			138.78	41.2595	45.4352	47.8171	48.1528	47.0663	46.0096	45.548	46.8292
138.88	44.5755	43.7718	47.4153	48.3778	47.4503	48.0012	48.0324	49.1802			138.88	43.0497	42.2806	45.7514	47.4578	46.9462	46.7434	46.0081	47.3164			138.88	41.2854	45.4262	47.7964	48.1344	47.0589	45.953	45.5091	46.8206
138.98	44.5535	43.7384	47.4027	48.3726	47.442	47.9922	48.0081	49.1671			138.98	43.0497	42.2478	45.7322	47.452	46.9348	46.741	46.0081	47.3141			138.98	41.2435	45.4262	47.7996	48.1172	47.0395	45.942	45.4703	46.791
139.08	44.5535	43.7478	47.391	48.3422	47.406	47.9638	47.9877	49.1478			139.08	43.0318	42.2363	45.7424	47.4325	46.9063	46.74	45.9913	47.2993			139.08	41.2435	45.3996	47.7806	48.0958	47.0216	45.9357	45.4858	46.7824
139.18	44.5407	43.7278	47.3525	48.3252	47.3941	47.9451	47.9635	49.1239			139.18	43.0275	42.1979	45.7256	47.4038	46.8892	46.7149	45.9631	47.3186			139.18	41.2116	45.4032	47.7679	48.0258	47.0067	45.92	45.447	46.751
139.28	44.5517	43.7017	47.3489	48.3058	47.361	47.9208	47.9448	49.0929			139.28	43.0497	42.1765	45.7104	47.3957	46.8778	46.6863	45.9351	47.2935			139.28	41.2435	45.3819	47.7379	47.9958	46.9844	45.8965	45.4238	46.7286
139.38	44.5353	43.6775	47.313	48.293	47.3369	47.9119	47.9473	49.0891			139.38	43.0409	42.1794	45.6745	47.3692	46.8607	46.6784	45.9374	47.2762			139.38	41.2435	45.3642	47.7379	47.9772	46.9695	45.8808	45.4083	46.6904
139.48	44.5079	43.6588	47.2852	48.2635	47.29	47.8908	47.9148	49.0721			139.48	43.072	42.1623	45.6745	47.3405	46.832	46.6692	45.9328	47.2476			139.48	41.2341	45.3376	47.7047	47.9673	46.9473	45.8571	45.3848	46.6817
139.58	44.4806	43.6429	47.2717	48.2313	47.2817	47.8614	47.9091	49.0497			139.58	43.072	42.1623	45.6426	47.3427	46.8458	46.6716	45.9071	47.219			139.58	41.2435	45.3376	47.6905	47.9531	46.9442	45.8178	45.3693	46.6384
139.68	44.4549	43.6231	47.2547	48.2279	47.2522	47.8567	47.9124	49.0297			139.68	43.0497	42.1481	45.6323	47.3152	46.832	46.6464	45.8789	47.2019			139.68	41.2435	45.2985	47.6777	47.9145	46.9248	45.8178	45.3693	46.6713
139.78	44.4348	43.6148	47.2206	48.2066	47.2199	47.8282	47.8848	49.0119			139.78	43.0497	42.1268	45.6105	47.2829	46.8377	46.6294	45.8891	47.1903			139.78	41.2595	45.2933	47.6777	47.8745	46.9099	45.7943	45.3725	46.6557
139.88	44.4567	43.5989	47.1982	48.1779	47.2052	47.799	47.8702	48.9794			139.88	43.0765	42.1125	45.6169	47.2829	46.7955	46.6008	45.8846	47.1869			139.88	41.2595	45.2488	47.6541	47.8531	46.8876	45.7973	45.3538	46.6297
139.98	44.4203	43.5833	47.164	48.1449	47.1684	47.7787	47.854	48.9624			139.98	43.023	42.0912	45.5823	47.2542	46.775	46.61	45.8677	47.1731			139.98	41.2116	45.2488	47.6383	47.8559	46.8848	45.7629	45.315	46.6122
140.08	44.4111	43.5571	47.164	48.1389	47.1527	47.747	47.8353	48.9501			140.08	43.0164	42.0912	45.5658	47.2507	46.7635	46.5837	45.8487	47.1331			140.08	41.2595	45.2222	47.6146	47.8217	46.8505	45.7392	45.3335	46.6262
140.18	44.4312	43.5539	47.147	48.122	47.1158	47.7227	47.82	48.9192			140.18	43.0164	42.1025	45.5466	47.2255	46.7556	46.5576	45.8341	47.1159			140.18	41.2116	45.2045	47.5986	47.7989	46.831	45.7156	45.315	46.6122
140.28	44.3945	43.5466	47.129	48.1084	47.0891	47.7153	47.7972	48.8837			140.28	42.9942	42.0697	45.5299	47.1967	46.7464	46.5382	45.806	47.0964			140.28	41.2501	45.1991	47.5749	47.7888	46.8028	45.6999	45.315	46.5862
140.38	44.3618	43.5309	47.1174	48.0958	47.0652	47.6901	47.7924	48.8806			140.38	42.9942	42.0342	45.5299	47.1852	46.7293	46.5074	45.7779	47.07			140.38	41.2435	45.2045	47.5591	47.7674	46.7716	45.6764	45.2918	46.5775
140.48	44.3691	43.5203	47.0815	48.0788	47.0531	47.6837	47.7632	48.8466			140.48	42.9985	42.0342	45.5184	47.1945	46.7259	46.5039	45.761	47.0585			140.48	41.173	45.1868	47.5512	47.7674	46.7657	45.6732	45.2995	46.5602
140.58	44.3527	43.5046	47.0635	48.0627	47.0255	47.6633	47.7551	48.8358			140.58	42.9606	42.03	45.5017	47.1415	46.7008	46.4891	45.7498	47.0621			140.58	41.1157	45.1603	47.5465	47.7532	46.7463	45.6372	45.276	46.5133
140.68	44.3179	43.4974	47.0367	48.0475	47.0062	47.643	47.7438	48.8057			140.68	42.9942	42.0199	45.4826	47.1221	46.6915	46.4811	45.7464	47.0357			140.68	41.1636	45.1637	47.5354	47.7175	46.7537	45.6291	45.2373	46.4909
140.78	44.2886	43.47	47.0249	48.0246	46.9794	47.6171	47.7292	48.7949			140.78	42.9606	42.0099	45.4698	47.0932	46.6721	46.4526	45.7218	47.0185			140.78	41.1316	45.1637	47.5117	47.7104	46.7165	45.6134	45.2373	46.4647
140.88	44.2704	43.4523	46.9944	48.0026	46.9729	47.6016	47.7081	48.7763			140.88	42.9384	41.9986	45.4403	47.1025	46.6607	46.4491	45.705	46.9898			140.88	41.1571	45.1212	47.4801	47.696	46.6941	45.5899	45.1923	46.4422
140.98	44.2741	43.4523	46.9783	47.984	46.9564	47.5887	47.6838	48.7532			140.98	42.9384	41.9942	45.4288	47.0645	46.6436	46.3934	45.6936	46.9864			140.98	41.1157	45.1459	47.472	47.6746	46.6897	45.5664	45.1675	46.4213
141.08	44.2522	43.4293	46.9468	47.9653	46.9296	47.5602	47.6611	48.7331			141.08	42.8449	41.9773	45.3994	47.0473	46.6151	46.3922	45.6936	46.9761			141.08	41.1538	45.1246	47.4562	47.6274	46.6971	45.582	45.1675	46.3902
141.18	44.2101	43.3947	46.92	47.9356	46.9066	47.5366	47.6456	48.7068			141.18	42.8985	41.9516	45.3764	47.0184	46.598	46.3762	45.6824	46.9497			141.18	41.1316	45.1069	47.4325	47.6461	46.6763	45.5474	45.1705	46.4004
141.28	44.1808	43.3947	46.902	47.9281	46.903	47.5172	47.623	48.7068			141.28	42.8828	41.9131	45.3392	46.9897	46.575	46.3693	45.6633	46.9462			141.28	41.1316	45.1123	47.4325	47.6105	46.6569	45.5458	45.1518	46.3867
141.38	44.1554	43.3757	46.8661	47.9078	46.8974	47.4937	47.6092	48.669			141.38	42.8495	41.9031	45.3355	46.961	46.5579	46.3386	45.6353	46.9497			141.38	41.1218	45.1157	47.4167	47.6033	46.6346	45.5271	45.1518	46.3607
141.48	44.1334	43.3579	46.8526	47.8865	46.867	47.4822	47.5897	48.642			141.48	42.8672	41.8889	45.3162	46.9322	46.5294	46.3214	45.6208	46.9325			141.48	41.1316	45.098	47.404	47.5891	46.6198	45.5537	45.113	46.3431
141.58	44.084	43.3507	46.8302	47.8807	46.8532	47.4643	47.5646	48.6296			141.58	42.8384	41.8619	45.2842	46.9288	46.5294	46.293	45.6173	46.9038			141.58	41.1316	45.0715	47.3375	47.5847	46.5706	45.535	45.0975	46.3345
141.68	44.0822	43.3318	46.8077	47.8383	46.844	47.4595	47.5516	48.6088			141.68	42.8384	41.8533	45.3137	46.8896	46.5351	46.2645	45.6208	46.8924			141.68	41.0931	45.0537	47.3503	47.5533	46.5453	45.5193	45.0742	46.3171
141.78	44.0567	43.3444	46.7853	47.8179	46.8228	47.4262	47.5484	48.5763			141.78	42.8384	41.8347	45.2688	46.8518	46.5123	46.2645	45.5792	46.8981			141.78	41.0898	45.0537	47.3535	47.5533	46.5424	45.5082	45.051	46.2911
141.88	44.0457	43.3108	46.7647	47.7976	46.8053	47.4181	47.5233	48.5662			141.88	42.7803	41.8134	45.2459	46.823	46.4837	46.2474	45.5611	46.8866			141.88	41.1316	45.0095	47.3375	47.5618	46.523	45.4877	45.0355	46.2651
141.98	44.0366	43.2899	46.7512	47.7765	46.7933	47.3938	47.5014	48.564			141.98	42.7561	41.7779	45.2331	46.7828	46.4723	46.2155	45.5477	46.858			141.98	41.0837	45.0235	47.3139	47.5461	46.5081	45.472	45.009	46.2478
142.08	44.0146	43.2794	46.7297	47.7553	46.7841	47.3823	47.4998	48.5415			142.08	42.7427	41.7948	45.2138	46.7713	46.4552	46.2245	45.5365	46.8602			142.08	41.0837	45.0183	47.2744	47.5319	46.4738	45.4485	44.9888	46.2218
142.18	44.0111	43.2564	46.7163	47.741	46.7398	47.3506	47.477	48.5308			142.18	42.7561	41.785	45.201	46.7539	46.4267	46.1961	45.5309	46.8523			142.18	41.1316	45.0004	47.2744	47.499	46.4902	45.4249	44.9732	46.2305
142.28	43.9746	43.2479	46.6938	47.7214	46.7362	47.3271	47.4568	48.4975			142.28	42.7714	41.7465	45.1717	46.7161	46.4153	46.179	45.5084	46.8099			142.28	41.0837	45.0004	47.2507	47.4719	46.459	45.4044	44.9375	46.2043
142.38	43.9417	43.2238	46.6686	47.6808	46.7214	47.2995	47.4447	48.4852			142.38	42.7381	41.7421	45.1563	46.6851	46.398	46.1505	45.4938	46.803			142.38	41.0513	45.0004	47.2537	47.4604	46.4456	45.4454	44.9345	46.2078
142.48	43.936	43.2113	46.6588	47.6681	46.6993	47.2873	47.4341	48.4805			142.48	42.7048	41.7181	45.1371	46.677	46.3809	46.1482	45.4938	46.7778			142.48	41.0517	45.004	47.2349	47.439	46.4367	45.4092	44.9112	46.1869
142.58	43.9052	43.185	46.6373	47.6452	46.6891	47.2598	47.4187	48.4512			142.58	42.6826	41.7208	45.1332	46.654	46.3787	46.1162	45.4691	46.7606			142.58	41.0997	45.0004	47.2428	47.4177	46.3965	45.4014	44.8723	46.1869
142.68	43.8905	43.185	46.6248	47.6122	46.6707	47.2434	47.4073	48.4388			142.68	42.7048	41.6853	45.1243	46.6332	46.3638	46.0878	45.4276	46.732			142.68	41.0513	45.0004	47.2031	47.382	46.3742	45.3857	44.8723	46.1436
142.78	43.832	43.1693	46.5879	47.6113	46.6671	47.2126	47.3985	48.4172			142.78	42.6715	41.6811	45.0898	46.6493	46.3353	46.0764	45.4208	46.7204			142.78	41.0513	44.9827	47.1794	47.3678	46.3816	45.3857	44.8522	46.1436
142.88	43.832	43.1778	46.5673	47.6004	46.6302	47.1955	47.3539	48.4003			142.88	42.698	41.6525	45.0539	46.639	46.3239	46.0707	45.3938	46.6895			142.88	41.0193	44.9827	47.1399	47.3462	46.3593	45.3698	44.8335	46.1176
142.98	43.8065	43.1641	46.5672	47.5817	46.62	47.1785	47.3531	48.3855			142.98	42.7159	41.6211	45.022	46.6218	46.2895	46.0285	45.3758	46.6666			142.98	40.9331	44.9384	47.1162	47.332	46.3445	45.3463	44.818	46.1176
143.08	43.799	43.1452	46.5565	47.5757	46.6053	47.1639	47.3377	48.357			143.08	42.7159	41.6113	45.0026	46.5964	46.2827	45.9965	45.3625	46.6575			143.08	40.9234	44.9118	47.1004	47.3106	46.334	45.3463	44.818	46.0916
143.18	43.7864	43.1253	46.5305	47.5495	46.5832	47.1436	47.3222	48.3501			143.18	42.6558	41.5998	45.0002	46.5735	46.2553	45.9795	45.3343	46.654			143.18	40.9234	44.9295	47.0607	47.2749	46.3146	45.3306	44.7557	46.1141
143.28	43.7864	43.1044	46.5027	47.5266	46.5693	47.1346	47.3052	48.3276			143.28	42.6492	41.5785	44.9707	46.5493	46.2382	45.9726	45.3231	46.6426			143.28	40.9234	44.8975	47.018	47.2536	46.3146	45.3259	44.779	46.0916
143.38	43.7736	43.0896	46.4883	47.5182	46.5583	47.1119	47.289	48.3014			143.38	42.6267	41.5571	44.9412	46.5274	46.2382	45.9452	45.2951	46.6461			143.38	40.949	44.8941	46.9739	47.2563	46.2654	45.3038	44.7557	46.0743
143.48	43.7773	43.0803	46.4668	47.4928	46.538	47.1086	47.2736	48.2859			143.48	42.5934	41.5571	44.926	46.4918	46.2211	45.9281	45.2759	46.6288			143.48	40.9074	44.8764	46.9739	47.2563	46.2403	45.2835	44.7402	46.069
143.58	43.7534	43.0447	46.456	47.4716	46.5288	47.0973	47.2404	48.2713			143.58	42.5268	41.5429	44.9221	46.4746	46.2017	45.9167	45.2614	46.5978			143.58	40.9074	44.8905	46.95	47.2079	46.2372	45.2678	44.717	46.0481
143.68	43.7443	43.0352	46.4372	47.4471	46.5021	47.0689	47.2161	48.2589			143.68	42.5379	41.5216	44.913	46.4493	46.2039	45.9087	45.2332	46.5658			143.68	40.8081	44.8675	46.9263	47.1892	46.2178	45.2678	44.6967	46.0307
143.78	43.7408	43.03	46.4174	47.4267	46.4938	47.0615	47.2096	48.2419			143.78	42.5046	41.5101	44.8787	46.432	46.1891	45.8859	45.2311	46.5658			143.78	40.7889	44.8373	46.9263	47.1679	46.1627	45.2708	44.7015	45.9874
143.88	43.7132	43.0206	46.3914	47.4098	46.4662	47.0421	47.1974	48.2226			143.88	42.5046	41.5045	44.8556	46.417	46.1754	45.854	45.1884	46.5544			143.88	40.7473	44.8267	46.9105	47.132	46.1583	45.2646	44.6627	45.9874
143.98	43.7006	43.009	46.368	47.3843	46.4523	47.0364	47.1683	48.2111			143.98	42.5	41.4689	44.8529	46.3895	46.1469	45.8426	45.1716	46.5509			143.98	40.7473	44.7965	46.9232	47.1278	46.1212	45.2159	44.6547	45.9752
144.08	43.6676	43.0049	46.3626	47.3785	46.4367	47.0055	47.1634	48.1994			144.08	42.4866	41.4645	44.8172	46.4091	46.1354	45.8141	45.1434	46.5256			144.08	40.7953	44.7788	46.9026	47.1178	46.1063	45.1891	44.6392	45.9214
144.18	43.6457	42.9723	46.3277	47.3496	46.4219	46.9991	47.1366	48.1747			144.18	42.4823	41.4459	44.8043	46.386	46.1068	45.7913	45.121	46.5452			144.18	40.7633	44.7788	46.8631	47.0822	46.0838	45.2205	44.613	45.9145
144.28	43.6623	42.9577	46.3214	47.3318	46.4035	46.9836	47.1164	48.17			144.28	42.4487	41.4503	44.7851	46.3745	46.0989	45.7798	45.0874	46.5314			144.28	40.7633	44.761	46.8473	47.0608	46.069	45.208	44.6392	45.8919
144.38	43.6403	42.9441	46.3035	47.2996	46.3933	46.965	47.096	48.1323			144.38	42.4265	41.4148	44.7774	46.3434	46.084	45.7627	45.0761	46.5142			144.38	40.7152	44.7345	46.8234	47.0365	46.0869	45.1891	44.6005	45.8659
144.48	43.6256	42.9126	46.2873	47.287	46.3786	46.9544	47.0758	48.1222			144.48	42.4265	41.4033	44.7314	46.294	46.0441	45.74	45.0615	46.4947			144.48	40.7857	44.7345	46.7997	47.0036	46.069	45.1734	44.5772	45.8623
144.58	43.591	42.9147	46.2595	47.2768	46.3445	46.9365	47.0556	48.1083			144.58	42.3932	41.379	44.7149	46.2825	46.0577	45.7229	45.0592	46.4799			144.58	40.7633	44.7077	46.7839	46.9822	46.0198	45.1499	44.5617	45.8399
144.68	43.5947	42.898	46.247	47.2438	46.3297	46.9243	47.0248	48.0835			144.68	42.3599	41.355	44.6955	46.2653	46.0325	45.6944	45.0312	46.4913			144.68	40.7249	44.729	46.7839	46.9679	45.9947	45.1342	44.5617	45.8435
144.78	43.5891	42.8623	46.2245	47.2345	46.3021	46.8918	47.0094	48.0643			144.78	42.3599	41.3264	44.6636	46.2388	46.0154	45.6658	45.0031	46.4684			144.78	40.7152	44.6866	46.7602	46.9466	45.9796	45.1467	44.5384	45.8017
144.88	43.5727	42.8466	46.2075	47.2252	46.2773	46.8862	46.9907	48.062			144.88	42.3154	41.3008	44.6597	46.2251	45.9755	45.6488	45.0031	46.4511			144.88	40.7152	44.6847	46.7444	46.9323	45.9573	45.1264	44.5227	45.7999
144.98	43.5671	42.8215	46.1976	47.1819	46.2754	46.8626	46.9705	48.0304			144.98	42.3154	41.2965	44.6125	46.2251	45.9584	45.6419	44.9952	46.4478			144.98	40.7216	44.69	46.7444	46.9109	45.935	45.1215	44.515	45.779
145.08	43.5818	42.8078	46.1948	47.1735	46.2386	46.8617	46.9502	48.0218			145.08	42.2553	41.2864	44.5995	46.179	45.9549	45.626	44.9863	46.4087			145.08	40.6832	44.69	46.708	46.8751	45.9023	45.1105	44.4762	45.779
145.18	43.5708	42.7837	46.1797	47.1667	46.2376	46.8293	46.938	48.0002			145.18	42.2152	41.2722	44.5779	46.179	45.9333	45.6009	44.9694	46.3768			145.18	40.6769	44.6457	46.6889	46.8537	45.8651	45.0869	44.4607	45.7826
145.28	43.5489	42.7638	46.1527	47.1388	46.1961	46.8285	46.9097	47.9948			145.28	42.2152	41.2822	44.5612	46.1365	45.9105	45.5803	44.9581	46.3618			145.28	40.6192	44.6243	46.6652	46.8653	45.871	45.0712	44.4607	45.779
145.38	43.5708	42.7377	46.1392	47.1159	46.1879	46.8008	46.9072	47.9716			145.38	42.1818	41.2751	44.5766	46.1216	45.8956	45.5689	44.9413	46.3366			145.38	40.5871	44.6225	46.6889	46.8638	45.8531	45.0712	44.4404	45.779
145.48	43.5489	42.7103	46.1168	47.1015	46.1823	46.7935	46.8959	47.9585			145.48	42.1551	41.258	44.5203	46.1181	45.867	45.5519	44.9133	46.3366			145.48	40.5871	44.6014	46.6606	46.8152	45.8383	45.035	44.4265	45.7357
145.58	43.5271	42.6894	46.0943	47.0804	46.1713	46.7765	46.8772	47.9407			145.58	42.175	41.2367	44.4972	46.102	45.8498	45.5234	44.9133	46.308			145.58	40.5871	44.5746	46.6337	46.781	45.816	45.0445	44.383	45.7566
145.68	43.5033	42.6696	46.0854	47.0668	46.162	46.7578	46.8449	47.9284			145.68	42.1639	41.2195	44.4947	46.1043	45.8213	45.5062	44.8851	46.2794			145.68	40.5391	44.5746	46.6337	46.7609	45.8234	45.0445	44.3752	45.7357
145.78	43.4703	42.6559	46.0755	47.0541	46.1482	46.7456	46.8164	47.8967			145.78	42.1662	41.2011	44.478	46.087	45.7928	45.5062	44.8762	46.2644			145.78	40.5071	44.548	46.5942	46.7582	45.8011	45.0242	44.3597	45.7184
145.88	43.4813	42.6349	46.0477	47.0185	46.1114	46.7254	46.814	47.8728			145.88	42.1639	41.1769	44.4269	46.0664	45.77	45.4948	44.8571	46.2621			145.88	40.5071	44.5269	46.5703	46.7609	45.7415	45.0085	44.3209	45.7061
145.98	43.4794	42.6036	46.0316	46.9973	46.0994	46.7091	46.7743	47.8527			145.98	42.1439	41.1798	44.3846	46.0469	45.7356	45.464	44.8459	46.2599			145.98	40.5071	44.5623	46.5545	46.7467	45.7192	44.9722	44.2977	45.6924
146.08	43.485	42.5846	46.0074	46.982	46.0892	46.6847	46.7581	47.8534			146.08	42.1041	41.1798	44.3629	46.0043	45.7071	45.4744	44.8291	46.2506			146.08	40.459	44.5251	46.5545	46.711	45.7043	44.9847	44.2742	45.6664
146.18	43.4631	42.5668	46.0154	46.966	46.0515	46.6709	46.7305	47.8303			146.18	42.1041	41.1798	44.3309	45.9836	45.6957	45.4514	44.8009	46.2163			146.18	40.5071	44.5446	46.5593	46.6896	45.6851	44.9455	44.2587	45.6402
146.28	43.4794	42.569	45.9848	46.9507	46.0414	46.6555	46.7029	47.804			146.28	42.0816	41.1627	44.3334	45.9606	45.6671	45.4379	44.7763	46.222			146.28	40.4494	44.5074	46.5466	46.6538	45.679	44.9455	44.2354	45.661
146.38	43.4722	42.5616	45.9553	46.9211	46.0239	46.6327	46.7094	47.794			146.38	42.0816	41.1399	44.3155	45.9434	45.6329	45.4208	44.7561	46.1761			146.38	40.395	44.5038	46.5101	46.6324	45.6449	44.9298	44.1842	45.6488
146.48	43.4759	42.526	45.9328	46.9	45.9787	46.6092	46.6786	47.7746			146.48	42.0482	41.1114	44.295	45.9145	45.5872	45.4036	44.7561	46.1761			146.48	40.363	44.4595	46.5039	46.6182	45.6523	44.9187	44.178	45.6368
146.58	43.4612	42.5091	45.9346	46.8678	45.9686	46.6035	46.6681	47.7554			146.58	42.0482	41.1198	44.2733	45.8858	45.5757	45.4014	44.7448	46.1589			146.58	40.363	44.4452	46.4834	46.5683	45.63	44.8936	44.1577	45.6488
146.68	43.4301	42.5113	45.9239	46.8331	45.952	46.5914	46.6503	47.7454			146.68	42.0482	41.1085	44.2515	45.8686	45.5472	45.3865	44.728	46.1303			146.68	40.315	44.415	46.447	46.5583	45.5927	44.8857	44.1657	45.6228
146.78	43.4521	42.4987	45.9113	46.8195	45.9437	46.5735	46.6421	47.7306			146.78	42.0816	41.1085	44.2541	45.8399	45.5187	45.3751	44.7168	46.1017			146.78	40.2669	44.4293	46.4279	46.5396	45.5883	44.856	44.1422	45.6402
146.88	43.4577	42.4756	45.9077	46.7754	45.9253	46.5605	46.6178	47.7114			146.88	42.0482	41.0701	44.2222	45.8225	45.5016	45.3443	44.6999	46.0822			146.88	40.2349	44.4186	46.4644	46.5396	45.5555	44.8511	44.1034	45.6228
146.98	43.4448	42.4379	45.8718	46.7365	45.9123	46.5402	46.6163	47.7029			146.98	42.0482	41.0515	44.203	45.7938	45.4867	45.3124	44.6886	46.0718			146.98	40.283	44.415	46.4437	46.504	45.5407	44.823	44.0676	45.5795
147.08	43.4266	42.4285	45.8638	46.7154	45.8995	46.5369	46.6057	47.6889			147.08	41.9992	41.0088	44.2054	45.7962	45.4639	45.301	44.6718	46.057			147.08	40.2349	44.3884	46.4437	46.504	45.5184	44.8354	44.0615	45.5535
147.18	43.4065	42.4024	45.8629	46.6823	45.8828	46.5085	46.5732	47.6704			147.18	41.9927	41.026	44.1901	45.7824	45.4593	45.2633	44.6572	46.0387			147.18	40.2349	44.3707	46.4437	46.4782	45.481	44.8119	44.0444	45.5622
147.28	43.4119	42.3907	45.8431	46.6738	45.8746	46.4857	46.5627	47.6573			147.28	41.9594	40.9831	44.1709	45.7881	45.433	45.2441	44.6303	46.0101			147.28	40.2349	44.3441	46.42	46.5069	45.4588	44.8119	44.0024	45.55
147.38	43.4119	42.3625	45.8341	46.645	45.8534	46.4646	46.5473	47.6395			147.38	41.9816	40.9917	44.1427	45.7709	45.4136	45.2325	44.6291	45.9927			147.38	40.2349	44.3051	46.42	46.4726	45.4439	44.7884	43.9792	45.5362
147.48	43.3901	42.3541	45.8207	46.629	45.846	46.4557	46.5303	47.6148			147.48	41.9594	40.9733	44.1172	45.7663	45.3988	45.2154	44.6044	45.9779			147.48	40.1869	44.273	46.4042	46.4325	45.4439	44.8008	43.9404	45.5309
147.58	43.3716	42.3415	45.8144	46.6163	45.8377	46.4329	46.5043	47.5855			147.58	41.9192	40.9704	44.1006	45.7537	45.3702	45.179	44.5876	45.9813			147.58	40.1869	44.273	46.4042	46.4155	45.4037	44.7884	43.9482	45.5362
147.68	43.3826	42.3238	45.8071	46.595	45.8193	46.4127	46.4938	47.5754			147.68	41.9146	40.9618	44.0877	45.7363	45.3438	45.1721	44.5764	45.9389			147.68	40.1549	44.2553	46.3805	46.3711	45.4142	44.7773	43.9249	45.4926
147.78	43.3845	42.3101	45.7794	46.5739	45.8137	46.4029	46.4687	47.5414			147.78	41.9146	40.9376	44.0493	45.7363	45.3473	45.1413	44.5428	45.9355			147.78	40.1549	44.2288	46.3647	46.3969	45.3591	44.7648	43.8859	45.4666
147.88	43.3443	42.2713	45.7668	46.5485	45.7934	46.4021	46.4598	47.5159			147.88	41.9414	40.9547	44.0225	45.7214	45.2994	45.1152	44.5146	45.9068			147.88	40.1549	44.2022	46.3647	46.3613	45.3576	44.7648	43.8704	45.4406
147.98	43.3607	42.265	45.7498	46.5315	45.7796	46.3534	46.4509	47.506			147.98	41.9483	40.9662	44.0046	45.7157	45.2674	45.0934	44.4978	45.9034			147.98	40.1549	44.1845	46.341	46.3613	45.3397	44.7254	43.8472	45.4233
148.08	43.3663	42.2419	45.7264	46.5188	45.7769	46.3315	46.4322	47.4904			148.08	41.9215	40.9662	43.9917	45.6961	45.2503	45.0787	44.4866	45.9068			148.08	40.1068	44.1525	46.3489	46.3399	45.3397	44.7019	43.8239	45.4442
148.18	43.3607	42.2336	45.7148	46.4875	45.7723	46.3111	46.4103	47.472			148.18	41.8813	40.9561	43.9598	45.6846	45.2389	45.0559	44.4697	45.8953			148.18	40.0748	44.1223	46.3251	46.3256	45.3069	44.7208	43.8239	45.4233
148.28	43.381	42.2053	45.704	46.4613	45.7346	46.2893	46.3973	47.4387			148.28	41.8813	40.9591	43.9406	45.6674	45.2411	45.0559	44.4506	45.8645			148.28	40.1068	44.1223	46.2823	46.3355	45.2802	44.691	43.8006	45.4198
148.38	43.3625	42.1896	45.704	46.4426	45.7197	46.2518	46.3827	47.4195			148.38	41.8813	40.9447	43.9124	45.6559	45.2275	45.0273	44.4529	45.8403			148.38	40.0204	44.1012	46.2619	46.3085	45.2831	44.6815	43.7849	45.4095
148.48	43.3791	42.1875	45.6923	46.418	45.7124	46.2299	46.3682	47.4063			148.48	41.8813	40.902	43.9047	45.6467	45.2161	45.0102	44.4416	45.8587			148.48	40.0364	44.0514	46.2382	46.3041	45.2652	44.6705	43.7462	45.4093
148.58	43.3663	42.1509	45.6618	46.3994	45.6894	46.2056	46.3552	47.3824			148.58	41.8813	40.9091	43.9086	45.6249	45.1988	44.9954	44.4079	45.8496			148.58	39.9851	44.0691	46.2333	46.2898	45.2503	44.6626	43.7478	45.3624
148.68	43.3389	42.132	45.6501	46.3706	45.658	46.1958	46.3398	47.3615			148.68	41.848	40.8878	43.906	45.6213	45.1703	44.9818	44.3967	45.8324			148.68	39.9787	44.0514	46.2224	46.2399	45.2459	44.6469	43.7261	45.3624
148.78	43.3389	42.113	45.6125	46.3495	45.6488	46.1731	46.3155	47.3344			148.78	41.8525	40.9049	43.8893	45.5926	45.1532	44.9704	44.3933	45.8346			148.78	39.9787	44.0389	46.2224	46.2328	45.2355	44.6234	43.712	45.3191
148.88	43.3116	42.0952	45.6115	46.3334	45.6368	46.1593	46.3123	47.3175			148.88	41.8078	40.8878	43.8574	45.5834	45.1418	44.9532	44.3765	45.8037			148.88	39.9563	44.0426	46.1827	46.2185	45.2132	44.5996	43.6871	45.3191
148.98	43.2931	42.0921	45.608	46.3071	45.6138	46.1341	46.2855	47.3028			148.98	41.8036	40.8878	43.8382	45.5639	45.1247	44.9418	44.3461	45.806			148.98	39.9627	44.0426	46.1827	46.2184	45.2088	44.5604	43.6732	45.3018
149.08	43.2749	42.0827	45.5802	46.3089	45.5908	46.1341	46.2547	47.2827			149.08	41.8036	40.8878	43.796	45.5616	45.0961	44.9339	44.3293	45.7843			149.08	39.9691	44.0249	46.1464	46.1827	45.1983	44.5683	43.6607	45.2722
149.18	43.2622	42.0564	45.5667	46.2707	45.5816	46.0944	46.2393	47.2596			149.18	41.8392	40.8707	43.7806	45.5466	45.0789	44.9076	44.3013	45.7636			149.18	39.9884	44.0249	46.1163	46.1614	45.2252	44.5447	43.667	45.2498
149.28	43.273	42.0377	45.5677	46.2605	45.5539	46.0748	46.2149	47.2402			149.28	41.7924	40.8451	43.7614	45.5179	45.0504	44.8792	44.2968	45.7522			149.28	39.9307	43.9769	46.1147	46.1471	45.1789	44.5055	43.6452	45.2063
149.38	43.2531	42.0166	45.5451	46.2478	45.5355	46.0618	46.1979	47.2279			149.38	41.7745	40.8451	43.7268	45.5179	45.0504	44.8313	44.281	45.7465			149.38	39.9307	43.9538	46.1005	46.1228	45.1612	44.4818	43.6064	45.1976
149.48	43.2201	42.0083	45.5335	46.2334	45.5217	46.0391	46.1833	47.2139			149.48	41.7366	40.8621	43.7103	45.5006	45.0127	44.8301	44.2541	45.7177			149.48	39.9307	43.9608	46.064	46.1213	45.1387	44.4425	43.5831	45.1803
149.58	43.2421	41.9778	45.5129	46.214	45.494	46.0163	46.1728	47.2133			149.58	41.7634	40.8522	43.7103	45.5028	45.0025	44.7913	44.2698	45.7029			149.58	39.8987	43.9361	46.0768	46.1042	45.1537	44.419	43.5444	45.1369
149.68	43.2475	41.9715	45.4859	46.1961	45.4866	45.9928	46.1396	47.1916			149.68	41.7212	40.8307	43.7103	45.4753	44.9624	44.7594	44.2451	45.6777			149.68	39.9211	43.9449	46.0436	46.0828	45.1358	44.4033	43.5287	45.1576
149.78	43.1947	41.9486	45.4554	46.1936	45.4756	45.9766	46.129	47.1723			149.78	41.7412	40.8109	43.6973	45.4466	44.9477	44.7446	44.2283	45.6753			149.78	39.9307	43.9184	45.9881	46.0685	45.0941	44.3639	43.5131	45.1456
149.88	43.1928	41.9486	45.4527	46.1674	45.448	45.9636	46.1112	47.1452			149.88	41.7101	40.7881	43.6782	45.4397	44.919	44.7195	44.2002	45.6605			149.88	39.8826	43.9006	45.9693	46.0685	45.0792	44.3246	43.4899	45.1161
149.98	43.1781	41.9329	45.4303	46.1589	45.4461	45.9513	46.091	47.1221			149.98	41.6879	40.7739	43.6782	45.4431	44.9076	44.6911	44.1946	45.6318			149.98	39.8826	43.8741	45.9581	46.0685	45.057	44.3011	43.4666	45.0934
150.08	43.1689	41.9255	45.4168	46.1462	45.4286	45.9254	46.0893	47.1028			150.08	41.6811	40.7411	43.6834	45.4316	44.8905	44.6738	44.1665	45.6296			150.08	39.8506	43.8918	45.9375	46.0543	45.0747	44.2727	43.4479	45.0501
150.18	43.1563	41.9108	45.4096	46.1377	45.4277	45.8872	46.0569	47.095			150.18	41.6477	40.7241	43.6718	45.4144	44.887	44.6546	44.1553	45.5974			150.18	39.8506	43.8527	45.9217	46.0329	45.027	44.254	43.4356	45.0381
150.28	43.1161	41.8994	45.3881	46.1234	45.3908	45.8831	46.0561	47.085			150.28	41.6477	40.7026	43.6372	45.4029	44.8905	44.6283	44.1272	45.5688			150.28	39.8026	43.7887	45.898	46.0186	45.0168	44.2303	43.4434	45.0154
150.38	43.0831	41.8888	45.363	46.1267	45.3696	45.8539	46.0278	47.0534			150.38	41.6255	40.6884	43.6207	45.3799	44.8506	44.6248	44.1104	45.5574			150.38	39.8506	43.7853	45.898	45.9973	44.9973	44.191	43.4279	44.9981
150.48	43.0979	41.8668	45.346	46.1165	45.3557	45.8418	46.0027	47.0425			150.48	41.5922	40.667	43.5861	45.3592	44.8198	44.6112	44.0822	45.5424			150.48	39.8026	43.7587	45.8743	45.9828	44.9825	44.1518	43.3889	44.9721
150.58	43.0684	41.8563	45.3154	46.0759	45.3281	45.8279	46.0034	47.0155			150.58	41.6523	40.6485	43.5822	45.3454	44.8141	44.5826	44.0654	45.5286			150.58	39.7706	43.741	45.8585	45.9614	44.9602	44.144	43.3656	44.9754
150.68	43.0869	41.8469	45.2975	46.0615	45.3208	45.7938	45.9872	47.004			150.68	41.6076	40.6315	43.563	45.3178	44.7877	44.5712	44.0521	45.4736			150.68	39.8186	43.7551	45.8348	45.9543	44.9602	44.1283	43.3269	44.9545
150.78	43.0156	41.828	45.2912	46.0497	45.2969	45.7776	45.9629	46.9761			150.78	41.5811	40.6173	43.5657	45.3131	44.782	44.5542	44.0206	45.46			150.78	39.8186	43.7321	45.7951	45.9516	44.9453	44.0888	43.3036	44.9112
150.88	43.0102	41.8249	45.2688	46.0378	45.2747	45.767	45.9419	46.956			150.88	41.572	40.5958	43.5694	45.2994	44.7443	44.5257	43.9924	45.4312			150.88	39.857	43.7178	45.7714	45.9329	44.923	44.0418	43.3098	44.8939
150.98	43.0064	41.8176	45.2598	46.0403	45.2609	45.7508	45.9143	46.9445			150.98	41.5364	40.5788	43.5375	45.288	44.7249	44.4971	43.9756	45.4141			150.98	39.8666	43.6876	45.7682	45.9044	44.908	44.0072	43.2694	44.8679
151.08	43.0174	41.8102	45.2373	46.0226	45.2295	45.7183	45.9143	46.9368			151.08	41.503	40.5389	43.5221	45.2821	44.7135	44.48	43.9555	45.3855			151.08	39.8282	43.6699	45.7714	45.8973	44.8857	43.982	43.2724	44.8506
151.18	42.9644	41.7809	45.2239	46.0006	45.224	45.7159	45.8745	46.8966			151.18	41.503	40.5247	43.5119	45.2648	44.685	44.4606	43.9497	45.3567			151.18	39.8026	43.6736	45.7556	45.883	44.8708	43.9866	43.2072	44.8246
151.28	42.9644	41.7651	45.2015	45.9963	45.2037	45.6939	45.8688	46.892			151.28	41.5409	40.5034	43.4992	45.2534	44.6815	44.4402	43.942	45.3224			151.28	39.8026	43.6522	45.7556	45.8502	44.8664	43.9709	43.2243	44.8106
151.38	42.9644	41.7337	45.188	45.9786	45.165	45.6858	45.8575	46.8765			151.38	41.5142	40.5004	43.4569	45.2269	44.6736	44.4367	43.9116	45.3029			151.38	39.841	43.6522	45.7319	45.8116	44.856	43.9474	43.1917	44.781
151.48	42.8968	41.7254	45.1791	45.9615	45.1531	45.6656	45.821	46.8657			151.48	41.4808	40.4818	43.4518	45.2132	44.6563	44.4231	43.897	45.2766			151.48	39.8187	43.6256	45.7113	45.833	44.8337	43.9474	43.2104	44.7777
151.58	42.8914	41.7159	45.1655	45.9523	45.1475	45.655	45.8056	46.8556			151.58	41.4586	40.4777	43.4248	45.1821	44.6278	44.4116	43.8801	45.265			151.58	39.8666	43.5991	45.7001	45.8087	44.8114	43.9365	43.1871	44.7515
151.68	42.8914	41.72	45.1431	45.9302	45.1328	45.6339	45.7732	46.8363			151.68	41.4586	40.4463	43.384	45.1499	44.6278	44.3774	43.8386	45.2307			151.68	39.8666	43.56	45.6764	45.7902	44.7965	43.916	43.1839	44.755
151.78	42.8657	41.6845	45.1099	45.9217	45.107	45.6128	45.7724	46.8278			151.78	41.4498	40.425	43.3814	45.1212	44.5993	44.366	43.8487	45.2158			151.78	39.8666	43.528	45.6528	45.793	44.774	43.9003	43.1871	44.6977
151.88	42.8365	41.6551	45.0956	45.9108	45.0978	45.5957	45.748	46.8101			151.88	41.4475	40.4108	43.384	45.1212	44.5844	44.3512	43.8319	45.2078			151.88	39.8186	43.4926	45.637	45.776	44.7369	43.8768	43.1716	44.729
151.98	42.7946	41.629	45.0848	45.8938	45.0637	45.5964	45.7327	46.7978			151.98	41.4142	40.4064	43.3647	45.1097	44.5707	44.3376	43.8127	45.1745			151.98	39.9147	43.5103	45.6133	45.776	44.7443	43.8609	43.1668	44.6977
152.08	42.7726	41.629	45.0696	45.871	45.0333	45.5787	45.7221	46.7607			152.08	41.4142	40.375	43.3647	45.0947	44.5799	44.3262	43.7938	45.1586			152.08	39.8666	43.4837	45.6133	45.7544	44.722	43.8374	43.1326	44.6681
152.18	42.7544	41.5974	45.0713	45.8582	45.0241	45.5518	45.6938	46.7537			152.18	41.3629	40.3424	43.3519	45.0672	44.5535	44.3182	43.7959	45.1448			152.18	39.8666	43.4572	45.5975	45.733	44.6997	43.8217	43.1249	44.6508
152.28	42.7324	41.5713	45.0614	45.8253	45.0011	45.5315	45.6768	46.7476			152.28	41.3629	40.3367	43.3327	45.0522	44.5421	44.3033	43.7679	45.1162			152.28	39.8346	43.4572	45.561	45.7188	44.6997	43.8027	43.0861	44.6248
152.38	42.7488	41.5451	45.0202	45.8244	44.9844	45.5315	45.6621	46.7283			152.38	41.3695	40.3182	43.3173	45.0235	44.525	44.2748	43.7567	45.099			152.38	39.8666	43.4251	45.5547	45.6974	44.6774	43.7776	43.0829	44.6248
152.48	42.727	41.5294	45.0085	45.8133	44.9798	45.521	45.633	46.7166			152.48	41.3695	40.2897	43.3008	44.9924	44.5136	44.2634	43.7229	45.0874			152.48	39.8442	43.4358	45.5341	45.6945	44.6447	43.74	43.0441	44.5815
152.58	42.685	41.5084	45.0023	45.7931	44.9559	45.4811	45.624	46.7012			152.58	41.3361	40.2684	43.2713	44.974	44.4965	44.2599	43.7117	45.0876			152.58	39.8506	43.3949	45.4867	45.676	44.6357	43.7351	43.0239	44.5815
152.68	42.6812	41.5084	44.9663	45.7693	44.9411	45.4682	45.6013	46.6781			152.68	41.3139	40.2498	43.2687	44.9463	44.4714	44.2521	43.6837	45.0588			152.68	39.8987	43.3541	45.5136	45.6404	44.585	43.7351	43.0038	44.5642
152.78	42.7032	41.5053	44.9385	45.7473	44.9337	45.4471	45.5884	46.6704			152.78	41.3139	40.2327	43.2522	44.9315	44.461	44.235	43.6804	45.0726			152.78	39.8506	43.3329	45.4946	45.6473	44.5881	43.7541	43.0084	44.5588
152.88	42.6721	41.5084	44.9206	45.7397	44.9088	45.4259	45.5722	46.6471			152.88	41.3139	40.1971	43.2277	44.9119	44.4565	44.2156	43.6556	45.0588			152.88	39.889	43.3152	45.4788	45.6431	44.5658	43.7541	43.0006	44.526
152.98	42.6504	41.4698	44.9035	45.7236	44.895	45.4048	45.5665	46.6356			152.98	41.3074	40.1871	43.224	44.8969	44.4142	44.2007	43.6219	45.0302			152.98	39.8283	43.3205	45.4598	45.6289	44.5433	43.7432	42.9618	44.5588
153.08	42.59	41.4508	44.8668	45.7143	44.8609	45.3975	45.5471	46.6163			153.08	41.2917	40.1587	43.192	44.8589	44.4166	44.1687	43.6197	45.013			153.08	39.8506	43.3064	45.4075	45.6259	44.5285	43.7007	42.9696	44.538
153.18	42.59	41.4162	44.8533	45.6965	44.837	45.3837	45.5397	46.6008			153.18	41.2695	40.133	43.1727	44.8395	44.4109	44.1608	43.5938	44.9843			153.18	39.8506	43.2619	45.3917	45.6117	44.4913	43.7007	42.9587	44.5086
153.28	42.59	41.4141	44.847	45.6762	44.8186	45.365	45.5073	46.5923			153.28	41.2871	40.1187	43.1535	44.7934	44.38	44.163	43.577	44.9728			153.28	39.889	43.2139	45.368	45.5903	44.469	43.6991	42.9541	44.4946
153.38	42.5681	41.3964	44.821	45.6745	44.7826	45.3342	45.4992	46.5591			153.38	41.2584	40.0974	43.1511	44.7958	44.3651	44.1379	43.549	44.9557			153.38	39.8506	43.2301	45.3474	45.576	44.469	43.6802	42.9618	44.4946
153.48	42.5442	41.3753	44.7931	45.6507	44.7642	45.3309	45.4871	46.5468			153.48	41.2316	40.0974	43.1344	44.7819	44.3309	44.1095	43.5376	44.9442			153.48	39.8506	43.191	45.3522	45.5547	44.4317	43.6567	42.9571	44.4946
153.58	42.548	41.3429	44.7877	45.6483	44.743	45.322	45.4765	46.5274			153.58	41.225	40.0788	43.1242	44.7394	44.3195	44.0924	43.504	44.919			153.58	39.8186	43.1733	45.3253	45.5404	44.4317	43.6567	42.9463	44.4686
153.68	42.526	41.3459	44.7662	45.6321	44.7218	45.3065	45.4473	46.512			153.68	41.2293	40.069	43.1216	44.7164	44.2908	44.0673	43.4793	44.9178			153.68	39.7706	43.1679	45.3286	45.509	44.4273	43.6567	42.9231	44.4513
153.78	42.526	41.3303	44.7537	45.6169	44.7043	45.2895	45.4344	46.4911			153.78	41.2362	40.069	43.1242	44.7186	44.2875	44.0867	43.4478	44.9076			153.78	39.7962	43.1733	45.3047	45.5189	44.4168	43.6331	42.9199	44.4686
153.88	42.526	41.3041	44.7258	45.5661	44.6923	45.2651	45.4319	46.4788			153.88	41.2362	40.0548	43.0934	44.6899	44.2623	44.0753	43.4445	44.8983			153.88	39.8026	43.1465	45.2889	45.4861	44.3917	43.6221	42.8996	44.4426
153.98	42.4986	41.2779	44.707	45.5601	44.7034	45.2554	45.4222	46.4634			153.98	41.2182	40.0219	43.0703	44.6727	44.2452	44.0889	43.4534	44.8697			153.98	39.7706	43.1431	45.2652	45.4803	44.3499	43.5937	42.9074	44.4253
154.08	42.4839	41.2392	44.6855	45.5407	44.6739	45.2278	45.4157	46.4603			154.08	41.2139	39.9977	43.0576	44.6612	44.2338	44.0616	43.4366	44.864			154.08	39.7225	43.1199	45.2652	45.4618	44.3351	43.5937	42.8873	44.4253
154.18	42.4675	41.2203	44.6657	45.5127	44.6647	45.2164	45.3842	46.4518			154.18	41.1983	40.0092	43.0576	44.6577	44.2167	44.0467	43.4086	44.8468			154.18	39.7225	43.0934	45.2445	45.3933	44.2949	43.578	42.8795	44.4253
154.28	42.4219	41.214	44.6433	45.511	44.6371	45.1985	45.3736	46.4394			154.28	41.2025	39.9793	43.0384	44.6359	44.2144	44.0296	43.3805	44.8354			154.28	39.7225	43.0897	45.2684	45.369	44.2859	43.5545	42.8686	44.4027
154.38	42.3981	41.1993	44.6361	45.4797	44.6417	45.1604	45.3711	46.434			154.38	41.1692	39.9622	43.0538	44.5979	44.1995	44.0182	43.3547	44.8433			154.38	39.7225	43.0525	45.2382	45.3761	44.2532	43.5388	42.8453	44.434
154.48	42.3981	41.1449	44.6379	45.4585	44.6122	45.1555	45.3476	46.4139			154.48	41.1692	39.9735	43.0192	44.6082	44.171	43.9898	43.3243	44.8216			154.48	39.6425	43.0314	45.2099	45.3305	44.2204	43.5153	42.8298	44.434
154.58	42.3981	41.1291	44.5939	45.445	44.5771	45.1279	45.3306	46.4131			154.58	41.1359	39.972	42.9937	44.5635	44.1504	43.9988	43.3243	44.8067			154.58	39.6809	43.0046	45.186	45.3334	44.216	43.5153	42.8298	44.4355
154.68	42.3525	41.1155	44.5778	45.4408	44.5743	45.1116	45.303	46.3923			154.68	41.1026	39.9237	42.9655	44.5461	44.1447	43.9727	43.2828	44.7952			154.68	39.7385	42.9869	45.1702	45.3191	44.1787	43.5388	42.8143	44.4166
154.78	42.3378	41.0998	44.5481	45.4221	44.5679	45.093	45.2763	46.3637			154.78	41.0803	39.9051	42.9424	44.5439	44.1197	43.9555	43.2513	44.7804			154.78	39.6905	42.9426	45.1702	45.2976	44.1295	43.5153	42.825	44.3991
154.88	42.3343	41.084	44.5436	45.3908	44.5541	45.0783	45.2698	46.3629			154.88	41.0581	39.8838	42.9296	44.5461	44.1197	43.9384	43.2345	44.7585			154.88	39.6905	42.916	45.1465	45.3005	44.1267	43.4996	42.8143	44.4253
154.98	42.3488	41.0757	44.5149	45.3831	44.531	45.0523	45.2601	46.339			154.98	41.0581	39.8838	42.8951	44.5117	44.1048	43.9237	43.2312	44.7609			154.98	39.6585	42.8983	45.1593	45.2833	44.1044	43.4996	42.7909	44.42
155.08	42.3343	41.0631	44.4979	45.3501	44.5107	45.0255	45.2488	46.3127			155.08	41.0245	39.881	42.8721	44.5002	44.091	43.9156	43.2065	44.7323			155.08	39.6585	42.8538	45.1101	45.2691	44.1072	43.4917	42.7909	44.4253
155.18	42.3562	41.0474	44.4746	45.3442	44.5034	45.0117	45.2236	46.3127			155.18	41.0245	39.8411	42.8746	44.5002	44.091	43.8986	43.1783	44.7208			155.18	39.6585	42.8272	45.1433	45.2477	44.0895	43.4758	42.7692	44.4253
155.28	42.3396	41.0369	44.4629	45.3357	44.4804	44.9882	45.2188	46.2942			155.28	40.9758	39.8411	42.849	44.483	44.0716	43.8986	43.1615	44.7035			155.28	39.6585	42.8095	45.107	45.2334	44.0567	43.4523	42.7443	44.42
155.38	42.2795	41.0232	44.4522	45.3264	44.4711	44.9671	45.2058	46.2664			155.38	40.969	39.8054	42.844	44.4541	44.0853	43.8815	43.1335	44.6749			155.38	39.6104	42.8043	45.0833	45.212	44.012	43.4131	42.7443	44.408
155.48	42.2868	41.0117	44.445	45.3162	44.4472	44.9501	45.1952	46.2594			155.48	40.9624	39.8225	42.8273	44.4254	44.0568	43.8837	43.1222	44.7059			155.48	39.6104	42.7918	45.0833	45.1978	44.0104	43.3974	42.7211	44.4009
155.58	42.2887	40.9949	44.419	45.2722	44.4324	44.9403	45.1806	46.2533			155.58	40.9468	39.7912	42.8145	44.4025	44.0397	43.8609	43.0941	44.6921			155.58	39.5848	42.7387	45.0673	45.1762	43.9927	43.3738	42.7288	44.3991
155.68	42.2849	40.9603	44.4099	45.2569	44.4251	44.9151	45.1709	46.234			155.68	40.9468	39.787	42.7762	44.368	44.0374	43.8564	43.0773	44.6749			155.68	39.5464	42.7387	45.0673	45.162	43.9554	43.3501	42.7056	44.3731
155.78	42.2484	40.9551	44.3849	45.24	44.4021	44.9037	45.1571	46.2177			155.78	40.9134	39.777	42.7441	44.3588	44.0224	43.8678	43.0224	44.6635			155.78	39.5464	42.7119	45.0436	45.1406	43.9331	43.3344	42.6698	44.3731
155.88	42.2648	40.9426	44.3821	45.1977	44.3882	44.89	45.1523	46.1954			155.88	40.9134	39.777	42.7403	44.3449	44.011	43.8586	42.9874	44.6463			155.88	39.4984	42.6942	45.0627	45.1192	43.9405	43.3108	42.6543	44.3731
155.98	42.2576	40.9163	44.3579	45.1849	44.3578	44.8777	45.1385	46.1846			155.98	40.9134	39.7556	42.7313	44.3162	43.9849	43.8415	42.9841	44.6176			155.98	39.5304	42.6819	45.0436	45.1192	43.9182	43.2952	42.6278	44.342
156.08	42.2337	40.9331	44.34	45.1723	44.3495	44.8559	45.1329	46.1814			156.08	40.8801	39.7527	42.6967	44.3301	43.9849	43.8039	42.9594	44.6176			156.08	39.4984	42.6676	45.0436	45.0978	43.9034	43.3078	42.6123	44.3298
156.18	42.2192	40.9216	44.3041	45.1443	44.333	44.8428	45.0923	46.1537			156.18	40.8579	39.7343	42.6903	44.3117	43.9574	43.7674	42.965	44.6061			156.18	39.476	42.6942	45.0278	45.0836	43.8811	43.3108	42.6123	44.3644
156.28	42.1972	40.9048	44.2924	45.1367	44.2943	44.8185	45.0996	46.1274			156.28	40.8399	39.7343	42.6738	44.299	43.9369	43.7697	42.9146	44.589			156.28	39.5304	42.6463	45.0167	45.062	43.8811	43.2873	42.6091	44.368
156.38	42.1972	40.8902	44.2861	45.1113	44.2794	44.8014	45.0712	46.1235			156.38	40.8533	39.7201	42.6608	44.2818	43.9391	43.7617	42.92	44.5775			156.38	39.4343	42.641	44.9914	45.0092	43.8439	43.2511	42.5891	44.3384
156.48	42.1699	40.8745	44.2727	45.0707	44.2685	44.7941	45.0599	46.1034			156.48	40.8066	39.7044	42.6468	44.2978	43.9254	43.7572	42.892	44.5604			156.48	39.46	42.6304	44.9772	45.005	43.8557	43.2322	42.5316	44.3384
156.58	42.1517	40.8514	44.235	45.0656	44.2593	44.7827	45.0509	46.0927			156.58	40.82	39.7059	42.6289	44.2737	43.9004	43.7275	42.892	44.5489			156.58	39.4343	42.6056	44.9805	44.9836	43.8514	43.2322	42.5036	44.3211
156.68	42.1662	40.8305	44.2171	45.0452	44.2224	44.7503	45.0315	46.0656			156.68	40.8021	39.6958	42.6161	44.2415	43.8935	43.7104	42.8842	44.5318			156.68	39.4343	42.602	44.9835	44.9478	43.8363	43.2165	42.4881	44.2951
156.78	42.1552	40.8346	44.2009	45.0436	44.1994	44.7373	45.0088	46.0432			156.78	40.8021	39.6988	42.597	44.2507	43.8684	43.7104	42.8752	44.534			156.78	39.4343	42.6056	44.9489	44.9335	43.7992	43.193	42.4835	44.2516
156.88	42.146	40.822	44.174	45.0554	44.1902	44.721	44.9885	46.0347			156.88	40.7687	39.6816	42.5752	44.2357	43.857	43.6818	42.8719	44.534			156.88	39.4023	42.5967	44.9489	44.895	43.7769	43.1537	42.4881	44.2656
156.98	42.1023	40.8063	44.165	45.0351	44.18	44.7088	44.978	46.0162			156.98	40.7687	39.6517	42.5649	44.2242	43.8226	43.6762	42.864	44.5202			156.98	39.4407	42.5559	44.925	44.8765	43.7649	43.138	42.4912	44.2516
157.08	42.0967	40.7906	44.1461	45.0088	44.1716	44.6934	44.9707	45.9961			157.08	40.7733	39.6461	42.5329	44.2207	43.8204	43.6648	42.8471	44.4778			157.08	39.4023	42.5345	44.9092	44.8552	43.7426	43.1302	42.4539	44.2691
157.18	42.0658	40.7697	44.1318	44.9919	44.1515	44.6706	44.9456	45.9791			157.18	40.7465	39.6375	42.5047	44.1955	43.7941	43.6477	42.819	44.4709			157.18	39.3542	42.5345	44.8855	44.8193	43.7472	43.1302	42.4523	44.2638
157.28	42.0474	40.7456	44.1201	44.9801	44.1302	44.6585	44.9358	45.9583			157.28	40.7465	39.6133	42.497	44.1609	43.777	43.6271	42.8157	44.463			157.28	39.3542	42.508	44.8697	44.8193	43.7144	43.1145	42.4151	44.2256
157.38	42.031	40.7456	44.0842	44.9461	44.121	44.626	44.918	45.9521			157.38	40.6975	39.6446	42.4818	44.1322	43.7564	43.6078	42.8078	44.4342			157.38	39.3542	42.4902	44.846	44.7837	43.7098	43.1097	42.4103	44.2082
157.48	42.0055	40.7047	44.0618	44.9352	44.0979	44.6178	44.905	45.9367			157.48	40.6574	39.6346	42.4818	44.1208	43.7233	43.5965	42.7909	44.4171			157.48	39.3222	42.4778	44.8223	44.7793	43.6875	43.0986	42.3948	44.1823
157.58	42.0273	40.6994	44.0465	44.9326	44.0778	44.6122	44.8937	45.9204			157.58	40.6574	39.6346	42.4627	44.1127	43.7004	43.5965	42.7797	44.3999			157.58	39.2422	42.4671	44.8223	44.7523	43.6727	43.0907	42.3716	44.1856
157.68	42.0018	40.6859	44.0295	44.8954	44.0684	44.6057	44.8767	45.881			157.68	40.624	39.5961	42.4305	44.0725	43.6742	43.5884	42.7718	44.3713			157.68	39.2422	42.46	44.7984	44.7265	43.6622	43.0751	42.3328	44.1909
157.78	42.0055	40.6827	44.0215	44.8657	44.0445	44.5967	44.845	45.8733			157.78	40.6018	39.5919	42.4497	44.0678	43.6742	43.5792	42.755	44.3461			157.78	39.2422	42.4369	44.7826	44.7123	43.6563	43.0326	42.356	44.1649
157.88	41.9873	40.6565	43.9838	44.8547	44.0169	44.5773	44.8321	45.8594			157.88	40.6018	39.589	42.4281	44.0436	43.657	43.5508	42.7405	44.3139			157.88	39.2102	42.4369	44.7431	44.6909	43.6325	43.0123	42.3451	44.1787
157.98	41.9597	40.6502	43.9721	44.8369	44.0086	44.5432	44.8264	45.8425			157.98	40.5685	39.5562	42.4011	44.0379	43.6171	43.52	42.7291	44.3139			157.98	39.2005	42.4103	44.7194	44.6766	43.6132	42.965	42.3328	44.1389
158.08	41.9744	40.6198	43.9523	44.8166	43.9966	44.5391	44.8231	45.8393			158.08	40.5685	39.5562	42.3858	44.0116	43.6079	43.5188	42.7123	44.3025			158.08	39.1718	42.3926	44.7146	44.6552	43.6027	42.9493	42.3095	44.1214
158.18	41.9634	40.6104	43.929	44.7979	43.98	44.5123	44.7915	45.8184			158.18	40.5283	39.5178	42.3667	43.9793	43.5908	43.5052	42.7011	44.2682			158.18	39.1525	42.3926	44.7273	44.6339	43.6086	42.9258	42.2938	44.1127
158.28	41.9597	40.5915	43.9003	44.7895	43.9625	44.5002	44.7915	45.7984			158.28	40.5241	39.4993	42.3346	43.9575	43.5656	43.4937	42.6978	44.2566			158.28	39.0917	42.3926	44.6876	44.6194	43.5907	42.9477	42.2892	44.1389
158.38	41.9543	40.581	43.902	44.7733	43.9413	44.4708	44.7819	45.7783			158.38	40.5241	39.4665	42.3193	43.9506	43.5485	43.4596	42.6899	44.228			158.38	39.1205	42.366	44.6876	44.6152	43.5684	42.9385	42.2861	44.1163
158.48	41.9597	40.5581	43.8913	44.7531	43.9321	44.4636	44.7462	45.7505			158.48	40.5241	39.4636	42.3026	43.9368	43.5371	43.4504	42.6731	44.2108			158.48	39.0437	42.3483	44.664	44.5882	43.5536	42.9525	42.2706	44.0954
158.58	41.9197	40.5642	43.8805	44.7192	43.9155	44.4497	44.7348	45.7382			158.58	40.4639	39.4281	42.2643	43.9081	43.5086	43.4333	42.6428	44.1913			158.58	39.0404	42.3483	44.6719	44.5796	43.5313	42.9415	42.2318	44.0921
158.68	41.9288	40.5392	43.8554	44.7133	43.9257	44.4408	44.7226	45.732			158.68	40.4571	39.4139	42.2514	43.8965	43.5006	43.4197	42.6225	44.1959			158.68	38.9636	42.3358	44.6482	44.5666	43.5164	42.9179	42.2318	44.0954
158.78	41.9543	40.5392	43.8419	44.6913	43.9045	44.4092	44.7186	45.7204			158.78	40.4571	39.3712	42.2322	43.8701	43.4742	43.4254	42.6001	44.1513			158.78	38.954	42.3074	44.6482	44.5268	43.4941	42.8944	42.2085	44.0694
158.88	41.8994	40.5109	43.8302	44.6684	43.8805	44.4067	44.6789	45.7011			158.88	40.4528	39.3497	42.2284	43.8655	43.4709	43.4174	42.5832	44.1363			158.88	38.9219	42.3181	44.6245	44.5052	43.497	42.8787	42.1696	44.0521
158.98	41.8959	40.5076	43.8177	44.6328	43.8658	44.3864	44.6683	45.6895			158.98	40.4238	39.3357	42.2194	43.847	43.4628	43.4082	42.563	44.1191			158.98	38.8739	42.295	44.6245	44.491	43.4791	42.855	42.1696	44.0261
159.08	41.8465	40.4889	43.8106	44.6404	43.8381	44.388	44.6626	45.6702			159.08	40.4238	39.3355	42.2002	43.8298	43.4343	43.374	42.5551	44.0905			159.08	38.8739	42.295	44.6008	44.491	43.4568	42.8519	42.154	44.0001
159.18	41.8557	40.4762	43.7765	44.6023	43.8216	44.3604	44.6416	45.6602			159.18	40.4238	39.2999	42.1747	43.8102	43.4172	43.3878	42.5158	44.0905			159.18	38.8739	42.3038	44.6212	44.4725	43.4419	42.8314	42.1308	43.9947
159.28	41.8594	40.4762	43.7433	44.5862	43.8233	44.3523	44.6375	45.6509			159.28	40.3415	39.2999	42.1555	43.785	43.3887	43.3456	42.5124	44.0618			159.28	38.8259	42.2772	44.6008	44.4868	43.4048	42.7922	42.1153	43.9825
159.38	41.8101	40.4732	43.745	44.5667	43.7985	44.349	44.6124	45.6316			159.38	40.3349	39.2644	42.1426	43.7643	43.3772	43.3603	42.5046	44.0584			159.38	38.7938	42.2772	44.5722	44.4411	43.3825	42.7765	42.092	43.9565
159.48	41.8045	40.4564	43.7172	44.5456	43.7985	44.3377	44.6035	45.6122			159.48	40.3013	39.2502	42.1337	43.7643	43.3465	43.3285	42.4967	44.0504			159.48	38.7938	42.2507	44.5975	44.4482	43.3676	42.753	42.0765	43.9392
159.58	41.7935	40.4449	43.6939	44.5117	43.7755	44.3142	44.5865	45.6108			159.58	40.3013	39.196	42.1234	43.7528	43.3235	43.3205	42.499	44.0218			159.58	38.7938	42.2187	44.5771	44.4268	43.3452	42.7292	42.0717	43.9063
159.68	41.7953	40.4292	43.6849	44.4947	43.7663	44.3109	44.567	45.5891			159.68	40.268	39.1718	42.1043	43.7528	43.3088	43.2999	42.4788	44.0046			159.68	38.7458	42.2153	44.5771	44.4126	43.3482	42.7371	42.0423	43.9079
159.78	41.7771	40.4081	43.6598	44.4821	43.7293	44.3052	44.5314	45.5683			159.78	40.2281	39.1576	42.0902	43.7413	43.2801	43.2714	42.4596	43.9931			159.78	38.7458	42.2366	44.585	44.374	43.3423	42.7135	42.0143	43.8699
159.88	41.7497	40.405	43.6383	44.4634	43.7266	44.2784	44.5184	45.552			159.88	40.1834	39.1689	42.0787	43.7241	43.2687	43.276	42.4484	43.9644			159.88	38.7138	42.2153	44.5611	44.3482	43.308	42.7324	42.0143	43.8263
159.98	41.7278	40.4081	43.6059	44.4439	43.7184	44.2621	44.5078	45.5405			159.98	40.1968	39.1505	42.0697	43.7091	43.2516	43.2487	42.4407	43.9472			159.98	38.7138	42.1762	44.5611	44.3168	43.2857	42.7135	41.991	43.8177
160.08	41.6803	40.3767	43.5907	44.4354	43.7138	44.2508	44.4989	45.5204			160.08	40.168	39.1532	42.0532	43.6677	43.2345	43.2316	42.4451	43.9186			160.08	38.6978	42.171	44.5453	44.294	43.2709	42.6978	41.9678	43.8317
160.18	41.6712	40.3663	43.5799	44.4143	43.7036	44.2224	44.4859	45.5003			160.18	40.168	39.1404	42.0402	43.6539	43.206	43.203	42.4227	43.89			160.18	38.6594	42.1442	44.5248	44.2768	43.2486	42.6978	41.9707	43.8039
160.28	41.6583	40.3536	43.579	44.3932	43.6722	44.2094	44.4689	45.484			160.28	40.1902	39.1319	42.0556	43.6355	43.1911	43.1859	42.4237	43.8842			160.28	38.6657	42.1619	44.4979	44.2625	43.2455	42.6821	41.9336	43.8003
160.38	41.6366	40.3369	43.5575	44.3719	43.6667	44.1883	44.4536	45.4825			160.38	40.168	39.1049	42.0402	43.6205	43.183	43.1836	42.4148	43.8648			160.38	38.6657	42.1442	44.4821	44.2412	43.2261	42.6743	41.932	43.8039
160.48	41.631	40.3212	43.5566	44.3567	43.6253	44.1672	44.4292	45.4718			160.48	40.168	39.0836	42.0147	43.609	43.1545	43.1688	42.3756	43.8556			160.48	38.6177	42.1442	44.4821	44.2412	43.1889	42.6508	41.9133	43.783
160.58	41.6275	40.3118	43.5324	44.3406	43.6096	44.1581	44.3968	45.4331			160.58	40.1122	39.0579	42.0058	43.5918	43.1203	43.1404	42.3586	43.8556			160.58	38.6882	42.139	44.471	44.2198	43.1667	42.6397	41.9025	43.7657
160.68	41.631	40.2855	43.5324	44.3254	43.5874	44.1453	44.3887	45.4323			160.68	40.1122	39.0579	41.9891	43.5722	43.1225	43.1404	42.3474	43.827			160.68	38.6657	42.1442	44.4584	44.1841	43.1518	42.6115	41.8745	43.7657
160.78	41.631	40.272	43.5009	44.3017	43.5838	44.1265	44.3766	45.4053			160.78	40.1122	39.075	41.9724	43.5481	43.0974	43.1289	42.3138	43.8006			160.78	38.6177	42.1265	44.4345	44.1626	43.1518	42.6115	41.8357	43.7397
160.88	41.6109	40.2561	43.4919	44.2975	43.5635	44.1144	44.3684	45.4023			160.88	40.1122	39.0792	41.9482	43.5435	43.0665	43.1118	42.3138	43.7788			160.88	38.6657	42.0999	44.4345	44.1483	43.1369	42.6005	41.8125	43.743
160.98	41.5945	40.2404	43.4757	44.2728	43.5405	44.1006	44.366	45.3845			160.98	40.1122	39.0478	41.9059	43.5285	43.0563	43.0833	42.2834	43.7524			160.98	38.6657	42.0786	44.4187	44.127	43.1144	42.591	41.7783	43.6839
161.08	41.609	40.2341	43.4543	44.2433	43.5285	44.0851	44.3449	45.3768			161.08	40.1122	39.0436	41.8828	43.5216	43.0129	43.0719	42.2576	43.7353			161.08	38.5793	42.0468	44.395	44.1341	43.1175	42.5848	41.7503	43.6737
161.18	41.5908	40.2352	43.4408	44.228	43.5064	44.0656	44.3198	45.3598			161.18	40.1122	39.0108	41.8713	43.4917	43.0083	43.0639	42.2407	43.7353			161.18	38.5376	42.029	44.3713	44.1014	43.0996	42.5878	41.7115	43.6615
161.28	41.5304	40.2437	43.422	44.217	43.4741	44.0429	44.3214	45.3359			161.28	40.0566	39.0037	41.8522	43.4711	43.0083	43.0468	42.2239	43.7353			161.28	38.5761	42.0023	44.3713	44.0884	43.0952	42.5642	41.7115	43.6495
161.38	41.5159	40.2069	43.4085	44.2068	43.4668	44.0218	44.3117	45.3266			161.38	40.0877	38.9767	41.8548	43.4733	42.9673	43.0319	42.1957	43.7065			161.38	38.5857	41.9668	44.3555	44.0771	43.0668	42.5486	41.7115	43.5886
161.48	41.5122	40.1923	43.4004	44.184	43.4364	44.0007	44.2833	45.3211			161.48	40.09	38.9724	41.8278	43.4687	42.9626	43.0149	42.1924	43.6894			161.48	38.4993	41.9403	44.3319	44.0557	43.0401	42.525	41.6912	43.5835
161.58	41.4757	40.1671	43.3843	44.1704	43.4226	43.9715	44.2631	45.3126			161.58	40.09	38.9724	41.8202	43.4711	42.949	42.9772	42.1677	43.6688			161.58	38.4896	41.9082	44.2875	44.0412	43.0579	42.5518	41.6757	43.5399
161.68	41.4484	40.1629	43.3735	44.1662	43.3866	43.9706	44.2427	45.3033			161.68	40.0566	38.951	41.7998	43.4596	42.9203	42.9464	42.1397	43.6493			161.68	38.496	41.878	44.2654	44.0341	43.0371	42.5202	41.6695	43.5348
161.78	41.399	40.1514	43.3547	44.1331	43.3856	43.9536	44.2185	45.2763			161.78	40.0076	38.9253	41.778	43.4422	42.9089	42.9636	42.1262	43.647			161.78	38.4576	41.8481	44.2559	44.0341	43.0179	42.5015	41.6463	43.5226
161.88	41.3752	40.1357	43.3439	44.1238	43.3653	43.9259	44.2104	45.2632			161.88	40.0011	38.9013	41.7804	43.4422	42.901	42.926	42.1117	43.6229			161.88	38.432	41.8515	44.2448	44.037	42.9851	42.4777	41.626	43.514
161.98	41.3478	40.1272	43.3304	44.1102	43.3313	43.8975	44.1982	45.2338			161.98	39.9789	38.8869	41.7652	43.425	42.8747	42.9042	42.097	43.592			161.98	38.3808	41.8249	44.2021	44.0199	42.9761	42.4777	41.6214	43.4966
162.08	41.3478	40.0991	43.2999	44.0908	43.336	43.8869	44.1601	45.2253			162.08	40.0011	38.8513	41.7179	43.4135	42.8747	42.8895	42.0588	43.5748			162.08	38.4256	41.8072	44.2132	44.027	42.9434	42.462	41.595	43.4706
162.18	41.3478	40.0832	43.2936	44.0789	43.3211	43.8577	44.1285	45.213			162.18	40.0187	38.8685	41.7243	43.3963	42.8576	42.8781	42.0386	43.5634			162.18	38.4159	41.7806	44.1974	44.0056	42.9477	42.4512	41.5562	43.5106
162.28	41.3478	40.0885	43.281	44.046	43.2916	43.848	44.1155	45.1976			162.28	40.0011	38.82	41.6948	43.3963	42.829	42.8518	42.0274	43.5462			162.28	38.4192	41.7629	44.1925	43.9842	42.8837	42.4071	41.5562	43.4306
162.38	41.2803	40.0812	43.2586	44.0374	43.2824	43.8204	44.0968	45.1759			162.38	39.9678	38.7945	41.6628	43.3676	42.8176	42.8381	42.0105	43.5038			162.38	38.3775	41.7361	44.1974	44.0029	42.8794	42.3914	41.5172	43.4271
162.48	41.2966	40.0697	43.2694	44.0087	43.2686	43.8122	44.0847	45.1558			162.48	39.9678	38.7844	41.6653	43.3676	42.8005	42.8211	42.0128	43.5026			162.48	38.3295	41.6973	44.1735	43.9872	42.9091	42.3914	41.5405	43.4098
162.58	41.2693	40.0571	43.2551	43.9925	43.2548	43.7879	44.0645	45.1396			162.58	39.9498	38.7729	41.6501	43.3676	42.7891	42.7926	41.9993	43.506			162.58	38.3295	41.6653	44.1814	43.97	42.8914	42.3679	41.5172	43.4046
162.68	41.2658	40.0425	43.2362	43.9798	43.2207	43.7765	44.0466	45.1126			162.68	39.972	38.7729	41.618	43.3388	42.781	42.7755	41.9622	43.4717			162.68	38.3295	41.6387	44.1626	43.9486	42.8763	42.352	41.4785	43.3664
162.78	41.2658	40.0172	43.2264	43.9696	43.2152	43.7448	44.0337	45.1056			162.78	39.9564	38.7516	41.5898	43.3273	42.7663	42.7561	41.9432	43.4774			162.78	38.2718	41.621	44.1577	43.9557	42.854	42.3285	41.4443	43.3491
162.88	41.2382	40.0277	43.2048	43.9612	43.1995	43.7229	44.0223	45.0794			162.88	39.9299	38.7203	41.5693	43.3101	42.7684	42.7492	41.915	43.4602			162.88	38.2975	41.5801	44.134	43.9486	42.8317	42.3128	41.4162	43.3404
162.98	41.2529	40.0183	43.1878	43.9485	43.1857	43.7026	44.0052	45.0717			162.98	39.923	38.7332	41.5477	43.3067	42.7433	42.7275	41.8982	43.435			162.98	38.2751	41.5588	44.1182	43.9342	42.8317	42.2892	41.3775	43.3144
163.08	41.2419	40.0277	43.1734	43.9383	43.1765	43.6774	43.9833	45.0369			163.08	39.9498	38.7161	41.5156	43.2986	42.7525	42.7093	41.887	43.4143			163.08	38.3039	41.5056	44.0945	43.9128	42.8169	42.2735	41.3542	43.3109
163.18	41.1982	40.0205	43.1591	43.9079	43.1599	43.6636	43.981	45.0354			163.18	39.8965	38.6805	41.5028	43.2675	42.7262	42.699	41.8455	43.3857			163.18	38.2975	41.4879	44.0945	43.9128	42.7946	42.25	41.3542	43.2882
163.28	41.1652	40.0131	43.1464	43.9036	43.1378	43.6392	43.9631	45.0084			163.28	39.8897	38.659	41.4836	43.2468	42.7091	42.6637	41.814	43.4167			163.28	38.3231	41.4613	44.0787	43.8985	42.7797	42.2263	41.3494	43.2709
163.38	41.1596	39.9806	43.1357	43.8943	43.1166	43.6166	43.9477	45.0014			163.38	39.8897	38.6377	41.4517	43.2181	42.7114	42.6443	41.814	43.4029			163.38	38.3295	41.4648	44.0311	43.8914	42.7572	42.2216	41.3387	43.2658
163.48	41.1505	39.9785	43.124	43.8808	43.1101	43.6173	43.9218	44.9906			163.48	39.8897	38.6093	41.4324	43.2353	42.6977	42.6682	41.786	43.3914			163.48	38.3295	41.4434	43.9917	43.8772	42.7424	42.2075	41.3154	43.2327
163.58	41.147	39.9628	43.0936	43.8723	43.0927	43.6166	43.9104	44.9798			163.58	39.8675	38.6049	41.4004	43.2066	42.6806	42.6353	41.7691	43.3857			163.58	38.2815	41.3744	43.9759	43.8772	42.7201	42.1949	41.2874	43.2102
163.68	41.125	39.9576	43.0873	43.8698	43.0798	43.5889	43.9088	44.9559			163.68	39.8675	38.595	41.3914	43.1779	42.66	42.6159	41.7579	43.3491			163.68	38.3039	41.3671	43.9522	43.8415	42.6829	42.1713	41.2842	43.1842
163.78	41.1196	39.9366	43.0746	43.8528	43.0475	43.5759	43.8764	44.9304			163.78	39.8518	38.595	41.3685	43.1605	42.6291	42.5872	41.7242	43.3169			163.78	38.3231	41.3939	43.9125	43.8086	42.6725	42.1713	41.258	43.1583
163.88	41.0848	39.9125	43.0487	43.8241	43.0272	43.5783	43.857	44.9265			163.88	39.8231	38.595	41.3493	43.1411	42.6212	42.5588	41.7129	43.3112			163.88	38.3295	41.3335	43.873	43.8172	42.6606	42.1713	41.2765	43.1407
163.98	41.0502	39.8979	43.0181	43.8156	43.0078	43.5702	43.8578	44.9211			163.98	39.8231	38.595	41.3364	43.1261	42.6234	42.5417	41.6961	43.2998			163.98	38.3295	41.3051	43.8461	43.7872	42.6382	42.1478	41.2345	43.1147
164.08	41.0282	39.8685	43.0073	43.8172	42.9968	43.558	43.8359	44.9002			164.08	39.8008	38.585	41.3135	43.1146	42.6087	42.5303	41.6849	43.2826			164.08	38.3199	41.2892	43.8098	43.7701	42.6502	42.121	41.2144	43.0974
164.18	41.0009	39.858	42.9804	43.7893	42.9674	43.5442	43.8278	44.8708			164.18	39.8008	38.5737	41.3044	43.079	42.5949	42.5246	41.6681	43.254			164.18	38.3135	41.2572	43.7859	43.7701	42.6159	42.0754	41.2329	43.1096
164.28	41.0009	39.8423	42.9912	43.7648	42.9203	43.5214	43.8107	44.8801			164.28	39.794	38.5524	41.3044	43.0628	42.5949	42.5019	41.6399	43.2676			164.28	38.2655	41.2395	43.7464	43.7344	42.6307	42.0661	41.2222	43.0974
164.38	41.0009	39.8265	42.9642	43.741	42.9121	43.5052	43.7985	44.8631			164.38	39.8008	38.5551	41.2661	43.0456	42.5778	42.4846	41.6231	43.2597			164.38	38.2975	41.1952	43.7418	43.7202	42.5936	42.0456	41.1989	43.0714
164.48	40.9861	39.813	42.9607	43.7359	42.8937	43.4809	43.7832	44.8307			164.48	39.8008	38.538	41.2533	43.0341	42.5664	42.4562	41.6208	43.2288			164.48	38.2494	41.1952	43.7069	43.7202	42.5713	42.0064	41.1834	43.0714
164.58	40.9424	39.7773	42.9383	43.7308	42.877	43.4907	43.7645	44.8346			164.58	39.7741	38.4853	41.2393	43.0169	42.5492	42.4277	41.6063	43.2276			164.58	38.2431	41.1684	43.6673	43.6816	42.5564	41.9907	41.16	43.0541
164.68	40.9242	39.7585	42.9221	43.7241	42.8577	43.4728	43.7524	44.8376			164.68	39.7339	38.4982	41.2276	42.9996	42.5207	42.422	41.6085	43.2253			164.68	38.2718	41.1507	43.6326	43.6944	42.5519	41.9858	41.1522	43.0541
164.78	40.9223	39.7375	42.9239	43.6986	42.8447	43.4524	43.7475	44.8207			164.78	39.7339	38.4696	41.1957	42.9835	42.5069	42.4107	41.5951	43.2138			164.78	38.2431	41.1241	43.6071	43.6887	42.5191	41.9907	41.1367	43.0281
164.88	40.9277	39.7344	42.8969	43.6708	42.8273	43.4411	43.7426	44.8122			164.88	39.7296	38.4427	41.1868	42.9536	42.4886	42.4107	41.5669	43.1967			164.88	38.2174	41.1241	43.5883	43.6772	42.5042	41.9748	41.126	42.9967
164.98	40.9277	39.7113	42.8844	43.6445	42.8079	43.4159	43.7539	44.796			164.98	39.7162	38.4312	41.1893	42.9536	42.4922	42.3991	41.5501	43.1967			164.98	38.2174	41.1207	43.5486	43.6387	42.4894	41.9512	41.1367	42.9672
165.08	40.8821	39.7302	42.8682	43.6309	42.7867	43.4053	43.7183	44.7766			165.08	39.7296	38.427	41.1701	42.9364	42.4635	42.3934	41.5389	43.1852			165.08	38.2014	41.0976	43.5328	43.6202	42.4671	41.912	41.1134	42.9499
165.18	40.9041	39.6987	42.8333	43.6173	42.7618	43.3908	43.7102	44.7589			165.18	39.7162	38.4098	41.1574	42.9099	42.435	42.3764	41.5221	43.1852			165.18	38.1821	41.071	43.4965	43.6372	42.4299	41.9277	41.0979	42.9552
165.28	40.8875	39.6799	42.8342	43.6081	42.7388	43.3981	43.6916	44.7304			165.28	39.7117	38.4071	41.1382	42.9019	42.4179	42.3479	41.4996	43.168			165.28	38.1854	41.071	43.4301	43.5888	42.4299	41.8695	41.0747	42.9412
165.38	40.8765	39.6525	42.8162	43.5802	42.7296	43.3793	43.6794	44.7296			165.38	39.7117	38.3885	41.1254	42.8845	42.4065	42.3228	41.4828	43.16			165.38	38.1854	41.0444	43.4253	43.5802	42.4105	41.8255	41.0544	42.9152
165.48	40.8968	39.6536	42.8081	43.5615	42.7019	43.381	43.6591	44.7141			165.48	39.7385	38.3699	41.11	42.8673	42.3894	42.3193	41.485	43.1531			165.48	38.211	41.0265	43.4141	43.5702	42.4151	41.8019	41.0512	42.8892
165.58	40.8639	39.6558	42.7768	43.5335	42.6789	43.3558	43.647	44.711			165.58	39.7117	38.3743	41.1061	42.8558	42.3607	42.2908	41.4581	43.1221			165.58	38.1854	41.0744	43.3904	43.6016	42.3897	41.7863	41.0047	42.8716
165.68	40.8419	39.639	42.7642	43.5251	42.6789	43.355	43.6284	44.701			165.68	39.7117	38.353	41.0933	42.8432	42.3436	42.2738	41.4345	43.1221			165.68	38.1854	41.0744	43.3588	43.5844	42.3703	41.7627	40.9924	42.8716
165.78	40.7944	39.6118	42.7292	43.5124	42.6559	43.3282	43.6065	44.6701			165.78	39.696	38.3388	41.0895	42.8444	42.3322	42.2624	41.4355	43.1107			165.78	38.1694	41.0533	43.3352	43.5702	42.3331	41.7313	41.0172	42.8334
165.88	40.7853	39.6013	42.7095	43.4844	42.6384	43.3184	43.5984	44.6585			165.88	39.7162	38.3003	41.0933	42.8157	42.3151	42.2453	41.421	43.0935			165.88	38.1214	41.0621	43.2955	43.5702	42.3183	41.6919	40.9969	42.8023
165.98	40.7907	39.5981	42.6816	43.4811	42.618	43.286	43.57	44.6431			165.98	39.7051	38.3074	41.0651	42.8042	42.2865	42.2453	41.4008	43.0821			165.98	38.0893	41.0142	43.2845	43.5345	42.296	41.6684	40.9767	42.8023
166.08	40.7872	39.5782	42.6681	43.47	42.6163	43.2803	43.5553	44.6315			166.08	39.6672	38.3101	41.0422	42.7789	42.2751	42.2167	41.4075	43.0764			166.08	38.0893	41.0301	43.2481	43.536	42.2809	41.6448	40.9582	42.759
166.18	40.7907	39.5573	42.6493	43.4616	42.5988	43.2649	43.5546	44.6237			166.18	39.6672	38.313	41.0229	42.7696	42.2466	42.2304	41.3795	43.0476			166.18	38.067	40.9699	43.2481	43.4945	42.2735	41.6056	40.9427	42.7417
166.28	40.7724	39.551	42.6188	43.4362	42.573	43.2478	43.5254	44.6237			166.28	39.6849	38.3287	40.9909	42.7524	42.2501	42.2088	41.3559	43.0362			166.28	38.0477	40.9645	43.2086	43.4888	42.2364	41.5818	40.9427	42.7626
166.38	40.7724	39.5384	42.6143	43.4276	42.5499	43.2453	43.5083	44.6184			166.38	39.6405	38.2988	40.9909	42.7237	42.2295	42.1882	41.3457	43.019			166.38	38.0093	40.9645	43.2086	43.4559	42.2141	41.5818	40.927	42.7417
166.48	40.7724	39.5227	42.5973	43.4183	42.5251	43.2226	43.4873	44.6099			166.48	39.6339	38.2959	40.9782	42.6811	42.2238	42.1712	41.32	43.019			166.48	37.9613	40.9379	43.1928	43.4346	42.2394	41.5662	40.9037	42.7155
166.58	40.7177	39.5195	42.5793	43.3862	42.5195	43.2137	43.4646	44.5944			166.58	39.6339	38.2917	40.959	42.6604	42.186	42.1712	41.3109	43.0076			166.58	38.0093	40.9202	43.1689	43.4375	42.2215	41.5426	40.9037	42.6981
166.68	40.703	39.4912	42.5721	43.3727	42.4964	43.1942	43.4411	44.5828			166.68	39.5827	38.2817	40.9462	42.6604	42.1929	42.1427	41.2918	42.9904			166.68	38.0093	40.9202	43.1248	43.4203	42.1962	41.5034	40.893	42.6981
166.78	40.6866	39.4683	42.5587	43.354	42.4882	43.1723	43.4379	44.5627			166.78	39.5781	38.2503	40.9271	42.6317	42.1575	42.1255	41.2806	42.979			166.78	37.9773	40.8936	43.1531	43.3847	42.2141	41.4877	40.8759	42.693
166.88	40.6904	39.4735	42.5318	43.3489	42.4698	43.1618	43.42	44.5542			166.88	39.5781	38.2418	40.9271	42.6143	42.1575	42.1141	41.2526	42.9617			166.88	37.9773	40.9114	43.1104	43.3631	42.2125	41.464	40.8572	42.6808
166.98	40.7121	39.4514	42.5228	43.3235	42.4642	43.1341	43.3997	44.5334			166.98	39.5559	38.2432	40.9372	42.6028	42.1438	42.097	41.2245	42.924			166.98	37.9292	40.8936	43.1025	43.3275	42.1664	41.4436	40.8417	42.6808
167.08	40.6995	39.4598	42.5201	43.3007	42.4328	43.0992	43.3795	44.521			167.08	39.5559	38.2462	40.9359	42.5718	42.1414	42.1027	41.2245	42.9216			167.08	37.9292	40.9202	43.1057	43.3132	42.1575	41.4247	40.8184	42.6635
167.18	40.6995	39.4461	42.5031	43.2761	42.4089	43.109	43.3673	44.5056			167.18	39.5225	38.2248	40.9398	42.5569	42.1004	42.0764	41.2211	42.893			167.18	37.9292	40.8936	43.082	43.309	42.1693	41.409	40.8262	42.6375
167.28	40.714	39.4284	42.4869	43.2685	42.3822	43.0911	43.3608	44.491			167.28	39.5448	38.2248	40.9205	42.5454	42.0866	42.0378	41.2076	42.8735			167.28	37.9292	40.9114	43.0662	43.299	42.147	41.3855	40.8152	42.6201
167.38	40.6958	39.4409	42.4689	43.2557	42.3702	43.0879	43.3325	44.4825			167.38	39.5448	38.1891	40.9077	42.5154	42.0958	42.0309	41.2054	42.8666			167.38	37.9292	40.8936	43.0423	43.309	42.1321	41.3698	40.8027	42.6115
167.48	40.7121	39.4021	42.4662	43.2456	42.3472	43.0764	43.3171	44.4701			167.48	39.4935	38.1506	40.8886	42.5086	42.0695	42.0309	41.1908	42.8528			167.48	37.9292	40.8882	43.0456	43.2918	42.095	41.3461	40.7794	42.6115
167.58	40.6756	39.3875	42.4492	43.2143	42.3333	43.0668	43.3082	44.4631			167.58	39.4624	38.1636	40.8886	42.5017	42.0695	42.0172	41.1796	42.8357			167.58	37.9549	40.8936	43.0265	43.2633	42.0727	41.3068	40.7904	42.5853
167.68	40.6721	39.3781	42.433	43.2058	42.3278	43.0464	43.2927	44.4477			167.68	39.467	38.1536	40.8758	42.4857	42.0524	42.015	41.1627	42.8357			167.68	37.9612	40.8457	43.0029	43.2562	42.0502	41.3068	40.7562	42.5679
167.78	40.6721	39.3446	42.4231	43.1939	42.3131	43.0261	43.2725	44.4361			167.78	39.4847	38.165	40.8438	42.4879	42.0524	42.0001	41.1492	42.8047			167.78	37.9612	40.8403	43.0029	43.2275	42.0279	41.2801	40.7174	42.5419
167.88	40.6866	39.3446	42.4016	43.1635	42.3057	43.0018	43.2595	44.4138			167.88	39.4892	38.1237	40.8311	42.4683	42.0375	41.9967	41.1347	42.7589			167.88	37.8875	40.8491	42.9871	43.2177	42.0354	41.3068	40.7359	42.5386
167.98	40.6721	39.3111	42.3953	43.1355	42.2891	42.9887	43.2555	44.3867			167.98	39.4892	38.1293	40.8208	42.4362	42.0273	41.9716	41.1235	42.7383			167.98	37.8876	40.8226	42.9522	43.2204	42.0131	41.2833	40.7252	42.5159
168.08	40.6721	39.2963	42.364	43.1144	42.2781	42.9839	43.2279	44.382			168.08	39.4559	38.1322	40.8093	42.4246	42.0067	41.9603	41.1088	42.7268			168.08	37.9228	40.8049	42.9397	43.1848	42.0161	41.2676	40.7019	42.4986
168.18	40.6537	39.3058	42.3586	43.1017	42.2513	42.975	43.2134	44.3597			168.18	39.4559	38.1109	40.8221	42.4246	41.9953	41.9603	41.092	42.7268			168.18	37.9036	40.8049	42.9158	43.1462	41.9982	41.2598	40.6864	42.4517
168.28	40.6756	39.2921	42.3397	43.0804	42.2274	42.9717	43.1915	44.3642			168.28	39.4291	38.1109	40.8054	42.4097	41.9782	41.9693	41.0785	42.6809			168.28	37.8492	40.7994	42.9158	43.1276	42.0131	41.2441	40.6629	42.4204
168.38	40.6537	39.266	42.3388	43.0593	42.2293	42.9433	43.1962	44.338			168.38	39.4223	38.1136	40.7926	42.3959	41.9839	41.9603	41.0673	42.7119			168.38	37.8492	40.7658	42.916	43.1234	41.9982	41.2203	40.6397	42.4031
168.48	40.6263	39.268	42.3181	43.028	42.197	42.9343	43.1711	44.3156			168.48	39.4223	38.1009	40.808	42.3672	41.9805	41.9317	41.0505	42.673			168.48	37.8491	40.7606	42.9348	43.1276	42.0102	41.2157	40.6132	42.4291
168.58	40.6263	39.2429	42.2939	43.0144	42.2025	42.9149	43.1526	44.3048			168.58	39.4046	38.0752	40.7926	42.3292	41.9554	41.926	41.0223	42.6523			168.58	37.7691	40.7606	42.9	43.0919	42.0028	41.2046	40.6009	42.4031
168.68	40.6263	39.222	42.2939	42.9975	42.1859	42.88	43.1445	44.2763			168.68	39.3667	38.061	40.7798	42.3189	41.9382	41.8883	41.037	42.6523			168.68	37.7211	40.7551	42.8812	43.0777	41.9908	41.2	40.6009	42.4031
168.78	40.6046	39.2114	42.2581	42.9831	42.1721	42.88	43.1201	44.2647			168.78	39.3667	38.0467	40.7606	42.3268	41.9268	41.8861	41.0134	42.6237			168.78	37.6827	40.7606	42.8368	43.0735	41.9908	41.1889	40.6196	42.3771
168.88	40.6027	39.1863	42.2508	42.9729	42.1556	42.8596	43.0998	44.2469			168.88	39.3667	38.0254	40.7606	42.2831	41.9074	41.8747	41.0033	42.6064			168.88	37.641	40.7606	42.8526	43.0634	41.9759	41.1654	40.5854	42.3598
168.98	40.5807	39.1874	42.2267	42.9517	42.1334	42.8353	43.0796	44.24			168.98	39.3177	38.0396	40.7479	42.2614	41.8925	41.8712	40.9887	42.595			168.98	37.641	40.7426	42.8494	43.0676	41.9536	41.1654	40.5977	42.3338
169.08	40.5534	39.1748	42.2249	42.9213	42.1012	42.8271	43.0714	44.216			169.08	39.3713	37.9997	40.7312	42.2463	41.8754	41.8461	40.9887	42.595			169.08	37.641	40.7161	42.8131	43.0349	41.9388	41.1497	40.5651	42.3162
169.18	40.5807	39.1538	42.2239	42.9069	42.1002	42.8069	43.0488	44.2037			169.18	39.3177	37.997	40.7069	42.2349	41.864	41.8326	40.9607	42.5835			169.18	37.593	40.7161	42.7973	43.0106	41.9312	41.1262	40.5357	42.3371
169.28	40.5276	39.1371	42.2176	42.9	42.0689	42.7865	43.0358	44.1874			169.28	39.338	37.997	40.7094	42.2176	41.8811	41.7949	40.9775	42.5492			169.28	37.593	40.6895	42.8319	43.0134	41.9342	41.1105	40.5154	42.3162
169.38	40.526	39.1349	42.198	42.89	42.0384	42.7678	43.0123	44.1673			169.38	39.3266	37.9869	40.6902	42.2062	41.864	41.8143	40.9628	42.5377			169.38	37.545	40.6718	42.8131	42.992	41.9342	41.0994	40.5387	42.2989
169.48	40.5478	39.1192	42.1755	42.8527	42.0191	42.746	42.9839	44.155			169.48	39.3223	37.9727	40.6774	42.1889	41.8526	41.8006	40.9494	42.532			169.48	37.545	40.6718	42.7846	42.9949	41.9611	41.0789	40.4874	42.2902
169.58	40.5534	39.116	42.1746	42.8492	41.9905	42.7337	42.975	44.1488			169.58	39.289	37.947	40.6928	42.1775	41.8445	41.7892	40.9381	42.5033			169.58	37.593	40.6984	42.7418	42.9777	41.9388	41.0632	40.4937	42.2729
169.68	40.5386	39.1171	42.1477	42.8349	41.9813	42.7053	42.9636	44.1387			169.68	39.289	37.9286	40.6774	42.1624	41.8377	41.7561	40.9381	42.4747			169.68	37.593	40.6452	42.726	42.9421	41.9357	41.0272	40.4766	42.2729
169.78	40.5075	39.0951	42.1369	42.8221	41.9528	42.694	42.9417	44.1071			169.78	39.289	37.9328	40.6647	42.1349	41.8068	41.7516	40.9303	42.4747			169.78	37.5609	40.6275	42.7181	42.932	41.9163	41.0491	40.4409	42.2556
169.88	40.5295	39.0543	42.1126	42.8136	41.9344	42.6623	42.9353	44.0901			169.88	39.3001	37.9328	40.6493	42.1337	41.8239	41.7549	40.9068	42.4632			169.88	37.5353	40.6416	42.6944	42.9421	41.9014	41.027	40.4253	42.2296
169.98	40.5351	39.0533	42.0876	42.7883	41.9353	42.6485	42.9255	44.0739			169.98	39.3001	37.8858	40.6416	42.1061	41.7989	41.7378	40.9022	42.4461			169.98	37.4809	40.6043	42.6787	42.9207	41.8911	41.0129	40.4222	42.226
170.08	40.5276	39.028	42.0777	42.7739	41.8984	42.6322	42.8834	44.0561			170.08	39.3001	37.8943	40.6455	42.1027	41.7897	41.7265	40.9045	42.4173			170.08	37.4809	40.6007	42.6548	42.8807	41.894	41.0191	40.3989	42.2209
170.18	40.526	39.0176	42.075	42.773	41.8957	42.6078	42.8728	44.0407			170.18	39.24	37.8759	40.6327	42.074	41.7783	41.707	40.8932	42.4173			170.18	37.5065	40.615	42.658	42.8706	41.8791	41.0004	40.3834	42.2209
170.28	40.4984	39.0197	42.0561	42.7476	41.8883	42.5997	42.8558	44.0384			170.28	39.2332	37.8759	40.6134	42.0624	41.7612	41.6923	40.8764	42.3749			170.28	37.5129	40.5866	42.639	42.8493	41.8568	40.9847	40.3601	42.2036
170.38	40.4839	39.0008	42.0535	42.7231	41.8772	42.5794	42.8534	44.0098			170.38	39.2332	37.8615	40.6006	42.0544	41.7235	41.6751	40.8461	42.3601			170.38	37.5386	40.5564	42.5995	42.8279	41.8523	40.961	40.3804	42.1774
170.48	40.4767	38.9799	42.0427	42.6994	41.8496	42.5592	42.838	43.9735			170.48	39.2155	37.8402	40.5968	42.0566	41.7178	41.6547	40.8146	42.3566			170.48	37.5129	40.5387	42.6122	42.825	41.842	40.9374	40.3601	42.16
170.58	40.4657	38.9568	42.0229	42.6926	41.8514	42.5291	42.8307	43.975			170.58	39.1776	37.8189	40.5878	42.0325	41.696	41.6239	40.8146	42.3177			170.58	37.5129	40.5387	42.5995	42.8279	41.8046	40.9218	40.3414	42.134
170.68	40.462	38.9337	42.005	42.6739	41.8201	42.5266	42.808	43.9481			170.68	39.1776	37.8218	40.5533	42.0337	41.6755	41.6204	40.7978	42.297			170.68	37.5609	40.5262	42.5758	42.8279	41.8046	40.9218	40.3399	42.1167
170.78	40.462	38.9148	41.9907	42.6612	41.7943	42.4974	42.7999	43.9318			170.78	39.1956	37.8047	40.5367	42.005	41.6469	41.5988	40.7866	42.2856			170.78	37.5129	40.5033	42.5521	42.8306	41.7824	40.8982	40.3027	42.1167
170.88	40.462	38.9274	41.9637	42.6146	41.7925	42.4861	42.7675	43.9117			170.88	39.1374	37.7833	40.5176	42.0188	41.6492	41.5919	40.7698	42.2546			170.88	37.5513	40.4713	42.56	42.8136	41.7675	40.8668	40.2979	42.1116
170.98	40.462	38.9202	41.953	42.6062	41.7841	42.4657	42.7554	43.9133			170.98	39.1175	37.7691	40.5046	42.005	41.6219	41.5668	40.7495	42.2363			170.98	37.561	40.482	42.5361	42.7994	41.7452	40.859	40.2591	42.0994
171.08	40.4437	38.8971	41.9332	42.5935	41.7851	42.452	42.7391	43.8731			171.08	39.0953	37.7591	40.5046	41.9796	41.6013	41.5497	40.7607	42.2398			171.08	37.593	40.4447	42.5203	42.7778	41.7303	40.8558	40.2591	42.0907
171.18	40.4309	38.8991	41.9019	42.5723	41.7759	42.4535	42.7246	43.8592			171.18	39.0662	37.7334	40.4958	41.9589	41.5899	41.5383	40.736	42.2282			171.18	37.5225	40.4554	42.4966	42.795	41.7081	40.8196	40.2436	42.0525
171.28	40.4199	38.8887	41.9009	42.5621	41.7483	42.4333	42.7091	43.843			171.28	39.0662	37.7121	40.4753	41.9567	41.5647	41.5213	40.736	42.1859			171.28	37.5513	40.4588	42.4571	42.7849	41.7406	40.796	40.2623	42.0212
171.38	40.4164	38.8645	41.8901	42.53	41.7418	42.4146	42.6921	43.8268			171.38	39.0597	37.7008	40.4535	41.9531	41.5728	41.5213	40.708	42.1653			171.38	37.593	40.427	42.4681	42.7778	41.7081	40.7803	40.2436	42.0038
171.48	40.3944	38.8416	41.8739	42.5071	41.7344	42.3911	42.6661	43.8128			171.48	39.0662	37.7008	40.4023	41.9531	41.5441	41.4927	40.7215	42.1653			171.48	37.593	40.3843	42.4571	42.7564	41.7081	40.7568	40.2281	41.9743
171.58	40.3834	38.8258	41.8587	42.4808	41.7022	42.3829	42.6678	43.8075			171.58	39.0662	37.6836	40.4176	41.9244	41.518	41.4711	40.6832	42.1618			171.58	37.5609	40.3702	42.4571	42.7422	41.693	40.7598	40.2049	41.9778
171.68	40.389	38.7976	41.8363	42.4555	41.6884	42.378	42.6548	43.7951			171.68	39.0662	37.6665	40.4216	41.9383	41.5133	41.4585	40.6496	42.1539			171.68	37.4873	40.3702	42.4334	42.7065	41.705	40.7646	40.1894	41.9518
171.78	40.356	38.8038	41.8273	42.4478	41.6671	42.3536	42.6297	43.7913			171.78	39.0329	37.6623	40.3895	41.913	41.495	41.4414	40.635	42.1366			171.78	37.4809	40.3437	42.4176	42.7235	41.6856	40.7411	40.1536	41.9345
171.88	40.3853	38.785	41.8004	42.4513	41.6497	42.3383	42.6232	43.765			171.88	38.9996	37.6266	40.3703	41.913	41.4779	41.4187	40.6293	42.108			171.88	37.4809	40.2851	42.4176	42.7179	41.6856	40.7411	40.1271	41.9085
171.98	40.389	38.7682	41.7941	42.4537	41.6376	42.3098	42.62	43.7573			171.98	38.9774	37.6381	40.3703	41.9094	41.4585	41.4038	40.6316	42.0794			171.98	37.4809	40.2814	42.3937	42.6894	41.6707	40.7017	40.1116	41.891
172.08	40.3705	38.7336	41.7869	42.414	41.6192	42.2968	42.6013	43.7334			172.08	38.9774	37.6195	40.3485	41.9015	41.4471	41.39	40.6181	42.0622			172.08	37.4105	40.278	42.4016	42.6636	41.6484	40.7174	40.1271	41.8512
172.18	40.3523	38.7441	41.7798	42.4182	41.6054	42.2806	42.5957	43.7202			172.18	38.9774	37.6195	40.3703	41.8843	41.43	41.39	40.5901	42.0506			172.18	37.4008	40.2692	42.3543	42.6493	41.629	40.7017	40.1039	41.8354
172.28	40.3249	38.7273	41.7555	42.3894	41.5852	42.2676	42.5924	43.7048			172.28	38.9774	37.5881	40.3536	41.8726	41.4014	41.373	40.5788	42.0334			172.28	37.4008	40.2549	42.3589	42.628	41.6336	40.697	40.0884	41.8079
172.38	40.3249	38.7158	41.7223	42.3775	41.5612	42.2546	42.5632	43.6823			172.38	38.9774	37.5413	40.3384	41.8554	41.3728	41.3708	40.571	42.0186			172.38	37.4008	40.2549	42.2911	42.628	41.5964	40.6592	40.0884	41.8043
172.48	40.3177	38.7053	41.7304	42.3877	41.5565	42.2375	42.5526	43.6638			172.48	38.9173	37.5413	40.3192	41.8554	41.3728	41.3353	40.5901	42.0048			172.48	37.3656	40.2229	42.3148	42.6137	41.5964	40.6578	40.0651	41.7783
172.58	40.3158	38.6864	41.7242	42.3462	41.5501	42.2384	42.5422	43.6599			172.58	38.9705	37.544	40.3063	41.8358	41.3478	41.3331	40.5619	41.9934			172.58	37.3688	40.2317	42.2911	42.6137	41.5739	40.6389	40.0494	41.7608
172.68	40.2829	38.6666	41.6901	42.342	41.5224	42.218	42.5502	43.6453			172.68	38.9551	37.5269	40.3063	41.8382	41.3557	41.3126	40.5451	41.982			172.68	37.3208	40.2106	42.2751	42.5923	41.5368	40.6278	40.0261	41.7348
172.78	40.2464	38.6236	41.6729	42.3258	41.5206	42.2164	42.5308	43.6313			172.78	38.9774	37.5126	40.2846	41.8071	41.3077	41.3045	40.5339	41.9762			172.78	37.3688	40.1892	42.2704	42.5781	41.5339	40.6137	40.0029	41.7175
172.88	40.252	38.6299	41.664	42.314	41.4994	42.1962	42.5081	43.6267			172.88	38.9774	37.4913	40.2589	41.806	41.293	41.2761	40.5283	41.9739			172.88	37.3368	40.1432	42.2562	42.5737	41.5145	40.6232	39.9687	41.7088
172.98	40.2118	38.6163	41.6478	42.2869	41.4801	42.1668	42.4975	43.6144			172.98	38.944	37.4913	40.2232	41.7923	41.2781	41.2453	40.5171	41.9475			172.98	37.3625	40.1484	42.2467	42.5638	41.5071	40.6121	39.9408	41.6915
173.08	40.2281	38.6215	41.6388	42.2674	41.4672	42.1628	42.4822	43.5758			173.08	38.9705	37.4558	40.2001	41.7806	41.2643	41.2384	40.5003	41.9303			173.08	37.4008	40.1218	42.2356	42.5423	41.4922	40.5838	39.9251	41.6655
173.18	40.1935	38.613	41.6272	42.2589	41.4496	42.1596	42.4618	43.5649			173.18	38.9506	37.4529	40.1847	41.7692	41.2472	41.2305	40.4721	41.9303			173.18	37.3752	40.1041	42.2119	42.5209	41.4699	40.5681	39.9251	41.6395
173.28	40.1826	38.5953	41.6209	42.2378	41.4414	42.1312	42.4505	43.5503			173.28	38.9218	37.423	40.172	41.7634	41.2266	41.2133	40.4632	41.9017			173.28	37.3208	40.0916	42.1961	42.5066	41.4549	40.5445	39.9283	41.6219
173.38	40.1606	38.569	41.5905	42.2251	41.4054	42.1263	42.427	43.5357			173.38	38.8882	37.423	40.1629	41.7634	41.1959	41.2019	40.4418	41.9189			173.38	37.2504	40.0775	42.1771	42.4852	41.4505	40.521	39.8911	41.629
173.48	40.1606	38.5513	41.5733	42.2065	41.3797	42.1059	42.4254	43.5156			173.48	38.8882	37.4102	40.1425	41.7486	41.1787	41.194	40.4182	41.9154			173.48	37.2408	40.051	42.1485	42.471	41.4251	40.5053	39.905	41.6272
173.58	40.1643	38.545	41.5554	42.1785	41.3704	42.1108	42.3946	43.4954			173.58	38.866	37.3987	40.0978	41.7232	41.1673	41.1541	40.4048	41.8903			173.58	37.3144	40.033	42.1327	42.471	41.4028	40.4942	39.9096	41.6186
173.68	40.1351	38.5135	41.5446	42.1802	41.3428	42.0905	42.3946	43.4947			173.68	38.866	37.3845	40.0951	41.7118	41.1594	41.1393	40.3935	41.8788			173.68	37.2471	40.0064	42.1327	42.471	41.388	40.5162	39.8864	41.6046
173.78	40.1332	38.5126	41.5249	42.1701	41.3428	42.0654	42.3808	43.4754			173.78	38.8327	37.3874	40.1055	41.7072	41.133	41.1221	40.3767	41.873			173.78	37.2407	40.0064	42.0965	42.4352	41.3657	40.4785	39.874	41.5786
173.88	40.1332	38.4852	41.5088	42.1599	41.3198	42.0516	42.3776	43.463			173.88	38.8327	37.3703	40.0696	41.6886	41.1159	41.1152	40.3598	41.8444			173.88	37.2407	39.9887	42.0695	42.4494	41.3255	40.458	39.8367	41.5908
173.98	40.1276	38.4852	41.4926	42.159	41.3106	42.0394	42.3606	43.4715			173.98	38.866	37.3446	40.0914	41.6508	41.1216	41.0879	40.3463	41.8615			173.98	37.2087	39.9622	42.0663	42.4352	41.324	40.4345	39.8243	41.5439
174.08	40.1332	38.4632	41.4756	42.126	41.3106	42.0337	42.3621	43.463			174.08	38.8327	37.3318	40.0568	41.6404	41.0873	41.0879	40.315	41.8467			174.08	37.1927	39.971	42.0141	42.4253	41.3463	40.4109	39.7901	41.5648
174.18	40.1295	38.4643	41.4549	42.1252	41.2939	42.0053	42.3419	43.4538			174.18	38.8104	37.3134	40.044	41.6427	41.0759	41.0685	40.298	41.8593			174.18	37.1927	39.9622	42.0141	42.4281	41.3135	40.4188	39.7854	41.5439
174.28	40.1332	38.4497	41.4566	42.121	41.2765	41.9979	42.3298	43.446			174.28	38.8059	37.2919	40.0121	41.6312	41.0588	41.0538	40.3036	41.8329			174.28	37.1223	39.9622	41.9904	42.4281	41.3135	40.4329	39.7854	41.5179
174.38	40.1131	38.4329	41.4352	42.1048	41.2507	41.9866	42.3314	43.4383			174.38	38.7771	37.2777	39.9928	41.614	41.0588	41.0366	40.2868	41.8065			174.38	37.0646	39.9356	42.0094	42.4238	41.3061	40.4266	39.7699	41.5006
174.48	40.115	38.4172	41.3966	42.0837	41.2507	41.976	42.316	43.4476			174.48	38.7771	37.2564	39.9648	41.5852	41.0439	41.0081	40.2588	41.7963			174.48	37.0646	39.9179	42.0141	42.4138	41.2763	40.3842	39.7699	41.5144
174.58	40.0876	38.4066	41.3966	42.0812	41.2451	41.963	42.2989	43.4267			174.58	38.7438	37.2593	39.9417	41.568	41.0474	41.0218	40.242	41.7813			174.58	37.0646	39.8911	41.9904	42.4138	41.2541	40.3639	39.7699	41.4919
174.68	40.1021	38.3909	41.3688	42.0761	41.2323	41.9623	42.2811	43.4044			174.68	38.7438	37.2421	39.9225	41.5393	41.0189	40.9967	40.2173	41.7527			174.68	37.0389	39.8947	41.9904	42.3924	41.2361	40.3401	39.7512	41.4744
174.78	40.0657	38.3805	41.3697	42.071	41.2304	41.9354	42.2633	43.4128			174.78	38.7438	37.2223	39.8904	41.53	40.988	40.9796	40.1858	41.7413			174.78	37.0262	39.8734	41.9667	42.3895	41.2093	40.3401	39.6891	41.4693
174.88	40.082	38.3648	41.3561	42.0328	41.2156	41.9314	42.2398	43.3974			174.88	38.6703	37.2208	39.8776	41.4989	40.9698	40.9683	40.169	41.7413			174.88	37.0582	39.8682	41.9509	42.371	41.187	40.359	39.6766	41.4571
174.98	40.06	38.3668	41.3302	42.0303	41.1953	41.9403	42.239	43.3804			174.98	38.6657	37.1995	39.8738	41.5013	40.9731	40.9602	40.1711	41.7127			174.98	37.071	39.8557	41.9318	42.3568	41.1721	40.3166	39.6611	41.4571
175.08	40.0638	38.3386	41.3069	42.0108	41.1934	41.9257	42.2106	43.3866			175.08	38.6925	37.1851	39.8675	41.4874	40.9446	40.9512	40.1487	41.7012			175.08	37.0903	39.8291	41.8875	42.3352	41.1721	40.3244	39.6844	41.4571
175.18	40.0509	38.3123	41.2799	42.0108	41.1704	41.9054	42.2098	43.3765			175.18	38.6657	37.188	39.8431	41.4874	40.9252	40.934	40.1307	41.6839			175.18	37.023	39.8291	41.8638	42.3381	41.1841	40.3009	39.6611	41.4137
175.28	40.0236	38.2988	41.2512	41.9905	41.1585	41.8997	42.1782	43.3765			175.28	38.6657	37.1709	39.8354	41.4449	40.9275	40.9112	40.1128	41.6839			175.28	37.0422	39.8078	41.848	42.321	41.1603	40.2617	39.6611	41.3669
175.38	40.0107	38.3103	41.2458	41.9735	41.1557	41.8688	42.1635	43.3688			175.38	38.6657	37.1709	39.8201	41.4243	40.9103	40.8941	40.1016	41.6725			175.38	37.0966	39.7848	41.848	42.3168	41.135	40.2617	39.6378	41.3755
175.48	40.0144	38.284	41.2261	41.9524	41.1446	41.8705	42.1571	43.3394			175.48	38.6393	37.1495	39.8201	41.4437	40.8817	40.8906	40.1095	41.6553			175.48	37.0966	39.7794	41.848	42.2897	41.1424	40.246	39.6223	41.3618
175.58	40.0144	38.2642	41.2126	41.9286	41.129	41.842	42.1271	43.3301			175.58	38.6056	37.1353	39.7983	41.4162	40.8703	40.8657	40.1016	41.6439			175.58	37.0966	39.7848	41.8085	42.2811	41.1081	40.2224	39.5991	41.3355
175.68	39.9962	38.2735	41.1991	41.9388	41.1096	41.8201	42.1093	43.3186			175.68	38.5769	37.114	39.801	41.4012	40.8532	40.8576	40.0757	41.6381			175.68	37.0966	39.7848	41.7688	42.2853	41.0828	40.2065	39.5758	41.3355
175.78	39.9925	38.26	41.1659	41.9262	41.0894	41.7998	42.085	43.3009			175.78	38.5769	37.114	39.7816	41.3495	40.8246	40.8484	40.0488	41.6267			175.78	37.0966	39.7723	41.7688	42.2497	41.0679	40.2065	39.5601	41.3355
175.88	39.9962	38.2495	41.1498	41.9135	41.0645	41.7981	42.0857	43.2977			175.88	38.5991	37.0898	39.7536	41.3472	40.8246	40.8451	40.0421	41.6095			175.88	37.0646	39.7848	41.7421	42.2497	41.0456	40.1673	39.5213	41.3095
175.98	39.9632	38.2337	41.1354	41.9033	41.0387	41.7755	42.072	43.2707			175.98	38.5658	37.0883	39.7625	41.3207	40.8006	40.8508	40.0152	41.5808			175.98	37.055	39.776	41.7087	42.2139	41.0308	40.183	39.5446	41.2835
176.08	39.9541	38.218	41.1228	41.8779	41.0249	41.7583	42.0728	43.2699			176.08	38.5923	37.067	39.7433	41.3207	40.7904	40.8371	40.0005	41.5808			176.08	37.0262	39.776	41.6662	42.2097	41.0576	40.1405	39.5213	41.2871
176.18	39.9651	38.218	41.1139	41.8609	41.0157	41.7373	42.0404	43.2576			176.18	38.5589	37.0542	39.7433	41.292	40.7733	40.8086	39.9837	41.5808			176.18	37.055	39.7848	41.6502	42.2139	41.0382	40.1327	39.5058	41.2662
176.28	39.9139	38.1971	41.1031	41.8449	40.9991	41.7291	42.0315	43.2375			176.28	38.6056	37.0456	39.733	41.2886	40.7424	40.8006	39.9725	41.5556			176.28	37.0262	39.7583	41.6139	42.1996	41.0233	40.1311	39.4826	41.2351
176.38	39.9359	38.1814	41.0807	41.8228	40.9816	41.7145	42.0282	43.229			176.38	38.5769	37.0214	39.7023	41.2805	40.7367	40.7915	39.9557	41.5602			176.38	36.9845	39.7315	41.5837	42.1783	41.0129	40.1438	39.4671	41.2713
176.48	39.9013	38.1531	41.0529	41.8178	40.9558	41.6942	42.0153	43.2298			176.48	38.5991	37.0214	39.6986	41.2633	40.7218	40.7744	39.9443	41.5522			176.48	36.9109	39.7583	41.587	42.164	41.0039	40.1202	39.4438	41.2489
176.58	39.8774	38.1237	41.0511	41.7931	40.9456	41.682	41.9917	43.2105			176.58	38.5945	37.0072	39.6793	41.2344	40.7014	40.7629	39.9443	41.535			176.58	36.9301	39.7403	41.5347	42.164	40.9637	40.0621	39.4438	41.2489
176.68	39.8629	38.11	41.0331	41.772	40.9309	41.6675	41.9772	43.1958			176.68	38.5991	36.9858	39.6768	41.2172	40.691	40.7458	39.9331	41.5407			176.68	36.8885	39.7583	41.5078	42.1068	40.9414	40.0494	39.4203	41.1916
176.78	39.8536	38.1028	41.0197	41.7576	40.9079	41.652	41.9569	43.1966			176.78	38.6145	36.9829	39.6755	41.2229	40.6819	40.7174	39.9163	41.5236			176.78	36.8885	39.7583	41.492	42.1068	40.9488	40.021	39.408	41.1707
176.88	39.8136	38.0588	40.9972	41.7407	40.8867	41.643	41.9504	43.1796			176.88	38.5769	36.9858	39.6601	41.2057	40.6648	40.7003	39.8995	41.5201			176.88	36.8308	39.7492	41.4572	42.0712	40.9266	39.9945	39.3971	41.1447
176.98	39.8281	38.064	40.9837	41.7127	40.8765	41.6251	41.935	43.1425			176.98	38.5769	36.9474	39.6473	41.1909	40.6648	40.7025	39.9016	41.5121			176.98	36.8244	39.7583	41.4446	42.0613	40.9117	39.9788	39.369	41.162
177.08	39.8099	38.066	40.9506	41.7043	40.8775	41.6032	41.9164	43.1395			177.08	38.5769	36.9601	39.6473	41.1655	40.6477	40.6889	39.8883	41.4948			177.08	36.7764	39.7315	41.397	42.0498	40.9117	39.9788	39.3661	41.136
177.18	39.7587	38.0787	40.9362	41.6932	40.8507	41.574	41.9082	43.1502			177.18	38.5279	36.9501	39.6178	41.1655	40.634	40.6775	39.8771	41.4948			177.18	36.7443	39.7315	41.3812	42.0326	40.8894	39.9788	39.3738	41.1325
177.28	39.7587	38.0399	40.939	41.6873	40.8359	41.5667	41.8871	43.1202			177.28	38.5478	36.9288	39.6255	41.162	40.6019	40.6603	39.8714	41.4777			177.28	36.7187	39.7403	41.3812	42.0142	40.8894	39.9629	39.3505	41.11
177.38	39.7587	38.0441	40.9138	41.6747	40.8267	41.548	41.8701	43.1077			177.38	38.4946	36.9175	39.6154	41.123	40.6019	40.6489	39.8714	41.4639			177.38	36.738	39.7137	41.3812	41.9926	40.8894	39.9394	39.3116	41.0927
177.48	39.7624	38.0242	40.8967	41.6305	40.8147	41.5318	41.862	43.0846			177.48	38.5367	36.879	39.5962	41.1173	40.5986	40.6319	39.8601	41.4627			177.48	36.7187	39.7315	41.3418	41.967	40.8671	39.9394	39.2883	41.1396
177.58	39.7678	38.0043	40.8877	41.617	40.7963	41.5075	41.8369	43.0815			177.58	38.521	36.879	39.5808	41.1023	40.6214	40.6124	39.8433	41.4662			177.58	36.6643	39.6872	41.326	41.9599	40.8521	39.9158	39.2728	41.0978
177.68	39.7552	37.9791	40.8599	41.6069	40.7605	41.4969	41.8231	43.0714			177.68	38.5547	36.8577	39.5641	41.0736	40.6076	40.5977	39.8321	41.41			177.68	36.706	39.6872	41.2974	41.9498	40.8298	39.9158	39.2496	41.0754
177.78	39.7168	37.9382	40.8491	41.5941	40.7511	41.4668	41.8029	43.073			177.78	38.521	36.8604	39.5641	41.0609	40.5825	40.5863	39.8152	41.3974			177.78	36.6643	39.6872	41.3023	41.9498	40.8075	39.9158	39.2263	41.0492
177.88	39.7168	37.9215	40.833	41.5772	40.7438	41.4466	41.7891	43.0429			177.88	38.521	36.8548	39.5449	41.0368	40.562	40.5577	39.7984	41.386			177.88	36.7027	39.6729	41.2865	41.9113	40.7926	39.9158	39.2108	41.0665
177.98	39.7002	37.933	40.8232	41.5492	40.7189	41.4383	41.7923	43.039			177.98	38.4877	36.8577	39.5322	41.0298	40.5448	40.5406	39.7826	41.3688			177.98	36.7123	39.6835	41.2865	41.8713	40.7821	39.919	39.2108	41.07
178.08	39.6675	37.9162	40.7954	41.5417	40.718	41.4042	41.7761	43.0213			178.08	38.4877	36.8477	39.5282	40.9907	40.5334	40.5293	39.7861	41.3712			178.08	36.6739	39.6729	41.2389	41.8713	40.748	39.9237	39.1718	41.0492
178.18	39.6399	37.8859	40.7792	41.5095	40.6931	41.3953	41.7542	43.0097			178.18	38.4834	36.822	39.5218	40.9701	40.5334	40.5122	39.759	41.3608			178.18	36.6323	39.6658	41.2231	41.8499	40.748	39.9001	39.1486	41.0232
178.28	39.6254	37.8691	40.7549	41.5095	40.6719	41.3856	41.7404	42.9958			178.28	38.4544	36.822	39.5066	40.9792	40.5163	40.4836	39.7287	41.3288			178.28	36.5842	39.6552	41.2231	41.8314	40.733	39.8609	39.1517	41.0198
178.38	39.6364	37.8691	40.7522	41.4968	40.6627	41.3734	41.7299	42.9711			178.38	38.3943	36.8249	39.4681	40.9527	40.5049	40.4551	39.7142	41.3115			178.38	36.5458	39.6518	41.2231	41.8214	40.7107	39.842	39.1563	41.0094
178.48	39.5817	37.8335	40.7217	41.4756	40.6481	41.3556	41.7096	42.9517			178.48	38.392	36.8078	39.4553	40.9412	40.5014	40.438	39.6974	41.3138			178.48	36.5362	39.6252	41.2089	41.8256	40.6915	39.8215	39.1221	40.9885
178.58	39.5943	37.8146	40.7128	41.4688	40.6378	41.3303	41.6919	42.9502			178.58	38.3989	36.8078	39.4553	40.9102	40.4764	40.4186	39.6804	41.2864			178.58	36.4882	39.5861	41.1787	41.8113	40.6958	39.7979	39.1408	40.9365
178.68	39.5669	37.8125	40.6966	41.4654	40.6029	41.3207	41.6715	42.9232			178.68	38.4253	36.7935	39.4362	40.8896	40.4626	40.4267	39.6783	41.2829			178.68	36.4561	39.5541	41.1883	41.7715	40.6958	39.7744	39.0911	40.9658
178.78	39.5487	37.8041	40.7001	41.4359	40.5826	41.3011	41.6747	42.9185			178.78	38.3721	36.7835	39.4362	40.8746	40.4477	40.3924	39.6636	41.2714			178.78	36.4561	39.5541	41.1866	41.7885	40.681	39.7587	39.0631	40.9243
178.88	39.5487	37.8167	40.6768	41.418	40.5936	41.2573	41.6586	42.9132			178.88	38.3655	36.7651	39.408	40.855	40.4306	40.3639	39.6435	41.2543			178.88	36.4561	39.5364	41.1725	41.7401	40.6587	39.7352	39.0476	40.893
178.98	39.5066	37.8041	40.6518	41.4121	40.5826	41.2573	41.6488	42.8877			178.98	38.3476	36.7509	39.3721	40.8492	40.4284	40.3468	39.6244	41.2255			178.98	36.4145	39.5098	41.163	41.7413	40.6214	39.7195	39.0088	40.8756
179.08	39.5031	37.7821	40.6293	41.4061	40.5485	41.2297	41.6464	42.8692			179.08	38.343	36.7266	39.3721	40.8585	40.4043	40.3184	39.6132	41.2141			179.08	36.4081	39.4833	41.1488	41.7285	40.5947	39.7195	38.9855	40.8634
179.18	39.4811	37.7832	40.6158	41.3909	40.5319	41.2191	41.6407	42.8537			179.18	38.3254	36.7081	39.3594	40.8631	40.3736	40.2898	39.5963	41.1969			179.18	36.3857	39.4653	41.136	41.7072	40.5693	39.7114	38.97	40.8236
179.28	39.4482	37.7287	40.6041	41.3715	40.5162	41.2012	41.6254	42.8398			179.28	38.3319	36.6938	39.3505	40.8492	40.362	40.2921	39.585	41.1683			179.28	36.4465	39.4833	41.1551	41.7072	40.5619	39.7303	38.942	40.8323
179.38	39.4152	37.7339	40.5907	41.3613	40.5014	41.1858	41.6058	42.8352			179.38	38.3319	36.6725	39.353	40.8263	40.362	40.2556	39.5817	41.1396			179.38	36.4081	39.4565	41.152	41.6858	40.547	39.6957	38.9497	40.827
179.48	39.408	37.7296	40.5558	41.346	40.483	41.1663	41.5978	42.8035			179.48	38.2986	36.6924	39.3389	40.7998	40.3587	40.2328	39.585	41.1224			179.48	36.4081	39.4387	41.136	41.6501	40.547	39.6957	38.9155	40.7941
179.58	39.4061	37.7182	40.5468	41.3273	40.4766	41.1663	41.5824	42.7819			179.58	38.2986	36.6796	39.312	40.7804	40.3461	40.218	39.5548	41.111			179.58	36.4338	39.4387	41.1599	41.6715	40.5322	39.6957	38.8923	40.7628
179.68	39.4117	37.692	40.5261	41.3113	40.4425	41.1558	41.5743	42.7625			179.68	38.2986	36.6412	39.2698	40.7493	40.3278	40.2272	39.5401	41.0938			179.68	36.4081	39.4122	41.136	41.6501	40.5099	39.6722	38.8658	40.7628
179.78	39.3715	37.6679	40.5037	41.2995	40.4471	41.1347	41.5637	42.7487			179.78	38.2564	36.6227	39.2737	40.7343	40.2993	40.1964	39.5233	41.0652			179.78	36.3601	39.4387	41.1393	41.6472	40.4771	39.6565	38.8348	40.7368
179.88	39.3661	37.6574	40.4902	41.302	40.426	41.1217	41.5613	42.7332			179.88	38.2319	36.6397	39.2724	40.7366	40.273	40.1644	39.5121	41.0364			179.88	36.3601	39.421	41.1439	41.6386	40.4503	39.5984	38.7835	40.7057
179.98	39.3385	37.6574	40.4812	41.274	40.4231	41.1046	41.5622	42.7171			179.98	38.1986	36.6056	39.2418	40.7228	40.273	40.153	39.5121	41.0159			179.98	36.328	39.3731	41.1202	41.6143	40.4503	39.5937	38.81	40.7037
180.08	39.346	37.6186	40.4543	41.2706	40.3919	41.1054	41.5548	42.7046			180.08	38.2251	36.5985	39.2378	40.7343	40.2593	40.1359	39.4952	41.0078			180.08	36.328	39.389	41.1202	41.6001	40.428	39.5827	38.7913	40.697
180.18	39.3259	37.6281	40.4409	41.2698	40.3614	41.0835	41.5435	42.676			180.18	38.2319	36.5686	39.2147	40.7135	40.2685	40.1187	39.493	40.9907			180.18	36.28	39.3288	41.0965	41.5787	40.428	39.5921	38.7758	40.6675
180.28	39.2894	37.6312	40.4229	41.2639	40.3412	41.0632	41.5337	42.656			180.28	38.2319	36.54	39.1892	40.7032	40.2422	40.1073	39.4783	40.9483			180.28	36.28	39.3182	41.1044	41.6001	40.4131	39.5778	38.7525	40.6708
180.38	39.2967	37.5998	40.4202	41.2486	40.3245	41.0485	41.5233	42.6444			180.38	38.2496	36.5059	39.1777	40.6767	40.2502	40.104	39.4671	40.9276			180.38	36.232	39.3234	41.0696	41.5858	40.3908	39.5778	38.737	40.6499
180.48	39.2747	37.5893	40.4032	41.2411	40.3098	41.038	41.5151	42.6351			180.48	38.2319	36.5159	39.1546	40.686	40.2113	40.0822	39.4503	40.9128			180.48	36.2064	39.2791	41.0807	41.5644	40.3878	39.5543	38.7322	40.6326
180.58	39.2527	37.561	40.3646	41.2156	40.3107	41.0104	41.5005	42.6243			180.58	38.2584	36.5116	39.1522	40.671	40.1793	40.0618	39.4335	40.9219			180.58	36.1936	39.2614	41.0807	41.5431	40.3908	39.5386	38.737	40.6326
180.68	39.2473	37.5495	40.344	41.2046	40.2941	40.9933	41.5014	42.6043			180.68	38.2385	36.5301	39.1546	40.6734	40.1966	40.0504	39.4356	40.9047			180.68	36.2384	39.2401	41.057	41.5045	40.3908	39.5151	38.6919	40.6101
180.78	39.2254	37.5264	40.327	41.2046	40.2877	40.9739	41.4908	42.5996			180.78	38.1986	36.4944	39.1124	40.6595	40.1679	40.0469	39.4223	40.8761			180.78	36.2384	39.2083	41.0759	41.4859	40.3535	39.4915	38.6857	40.5893
180.88	39.1924	37.5232	40.3197	41.1893	40.2674	40.9577	41.4738	42.5834			180.88	38.1986	36.4802	39.0676	40.6399	40.1394	40.0082	39.4109	40.8474			180.88	36.1392	39.2294	41.0807	41.4645	40.3714	39.4758	38.709	40.6032
180.98	39.1999	37.5264	40.3063	41.1538	40.2582	40.9552	41.4689	42.5563			180.98	38.2074	36.4632	39.0562	40.6215	40.1109	39.9706	39.3829	40.813			180.98	36.1199	39.2171	41.057	41.4331	40.3714	39.4758	38.6982	40.5806
181.08	39.1833	37.472	40.2838	41.1411	40.2324	40.9341	41.4487	42.5425			181.08	38.1875	36.4488	39.0459	40.5847	40.0936	39.9763	39.3829	40.7902			181.08	36.1583	39.1638	41.057	41.4073	40.3535	39.4648	38.6748	40.5633
181.18	39.1615	37.4688	40.2703	41.1351	40.2269	40.9268	41.4381	42.5301			181.18	38.2097	36.4375	39.0139	40.5825	40.0915	39.9592	39.3661	40.7728			181.18	36.0975	39.1638	41.057	41.4073	40.3609	39.4521	38.6593	40.5373
181.28	39.1286	37.4446	40.2686	41.1182	40.1937	40.9064	41.4097	42.5309			181.28	38.1941	36.4162	38.9857	40.5675	40.0765	39.9614	39.3514	40.7752			181.28	36.0399	39.146	41.0412	41.393	40.3535	39.4521	38.6173	40.5373
181.38	39.1103	37.43	40.2604	41.0945	40.1753	40.8983	41.404	42.5077			181.38	38.1718	36.4047	38.9626	40.556	40.048	39.9478	39.3268	40.7614			181.38	35.9918	39.1018	41.0174	41.393	40.3506	39.4521	38.6127	40.4937
181.48	39.1103	37.4269	40.2416	41.0834	40.1771	40.8926	41.3968	42.5093			181.48	38.1761	36.3876	38.9589	40.541	40.0195	39.9227	39.3358	40.7328			181.48	35.9918	39.1018	40.9937	41.3603	40.3312	39.4521	38.6127	40.5406
181.58	39.083	37.4165	40.2255	41.0665	40.1559	40.8634	41.3773	42.4791			181.58	38.1761	36.3876	38.9499	40.5238	40.0023	39.9021	39.301	40.7156			181.58	35.9341	39.0752	40.9779	41.3431	40.3565	39.4129	38.5895	40.5199
181.68	39.061	37.408	40.2255	41.0479	40.1559	40.8439	41.3611	42.4637			181.68	38.1761	36.3834	38.9499	40.5044	39.9783	39.8851	39.3077	40.6985			181.68	35.9598	39.0575	40.9779	41.336	40.3609	39.3766	38.5895	40.4955
181.78	39.0371	37.4143	40.2138	41.0318	40.1246	40.831	41.3587	42.4567			181.78	38.1362	36.3706	38.8988	40.4928	39.9681	39.8759	39.2987	40.6697			181.78	35.9118	39.0307	40.9621	41.336	40.3417	39.3704	38.5505	40.4677
181.88	39.0098	37.3745	40.1905	40.9971	40.12	40.8131	41.3457	42.4483			181.88	38.1163	36.3521	38.8988	40.4583	39.951	39.8566	39.265	40.6411			181.88	35.9374	39.0307	40.9621	41.3046	40.3281	39.3736	38.5505	40.4851
181.98	39.0098	37.3745	40.1806	40.9945	40.0942	40.8009	41.3343	42.4289			181.98	38.1183	36.3307	38.8794	40.456	39.9225	39.8451	39.2538	40.6125			181.98	35.9118	38.9989	40.9509	41.2788	40.3386	39.3501	38.5273	40.4417
182.08	38.9897	37.364	40.1672	40.9819	40.0666	40.8106	41.3222	42.4189			182.08	38.1206	36.3307	38.8578	40.4318	39.9052	39.8451	39.237	40.609			182.08	35.9118	38.9687	40.9384	41.286	40.3043	39.3342	38.5505	40.4626
182.18	38.9916	37.3483	40.1241	40.959	40.0574	40.805	41.3149	42.4165			182.18	38.0983	36.2952	38.8501	40.41	39.8881	39.828	39.2257	40.5987			182.18	35.9118	38.9687	40.921	41.2817	40.2866	39.2982	38.5227	40.4244
182.28	39.0063	37.3566	40.1241	40.9437	40.0343	40.783	41.3043	42.3995			182.28	38.0716	36.2837	38.8347	40.3871	39.8859	39.8166	39.1976	40.5723			182.28	35.9118	38.951	40.9193	41.286	40.3015	39.2919	38.5195	40.4244
182.38	38.946	37.3588	40.1133	40.9379	40.0361	40.7489	41.2939	42.3849			182.38	38.0317	36.2595	38.831	40.3663	39.871	39.8166	39.1808	40.5723			182.38	35.8797	38.9031	40.8861	41.2474	40.2792	39.2714	38.5086	40.3931
182.48	38.9186	37.3431	40.107	40.9234	40.0389	40.7359	41.2784	42.3571			182.48	38.0317	36.2624	38.8156	40.3629	39.871	39.7995	39.1696	40.5552			182.48	35.8317	38.8799	40.872	41.2604	40.2687	39.2322	38.5117	40.3897
182.58	38.9149	37.3577	40.0999	40.8938	40.014	40.7253	41.2743	42.3486			182.58	38.0582	36.2283	38.8028	40.3663	39.8425	39.7995	39.1661	40.5666			182.58	35.8381	38.8533	40.8404	41.226	40.2196	39.2322	38.4962	40.3602
182.68	38.8966	37.3514	40.0864	40.8802	39.9808	40.7034	41.2516	42.3185			182.68	38.0249	36.2239	38.7874	40.3261	39.8195	39.7881	39.1528	40.5461			182.68	35.8573	38.8481	40.7991	41.2289	40.2418	39.2054	38.4605	40.3635
182.78	38.8856	37.3588	40.0864	40.8641	39.967	40.7034	41.2306	42.317			182.78	38.0206	36.1997	38.7643	40.3088	39.8162	39.7972	39.1414	40.5414			182.78	35.8317	38.8143	40.8118	41.2289	40.239	39.2085	38.4698	40.3549
182.88	38.8765	37.3326	40.0505	40.859	39.9605	40.6872	41.2054	42.2976			182.88	38.0382	36.2026	38.7427	40.2973	39.8024	39.7733	39.1337	40.5266			182.88	35.8317	38.8091	40.7912	41.2076	40.2196	39.2038	38.4497	40.3115
182.98	38.8728	37.3326	40.0344	40.8277	39.9569	40.675	41.1974	42.2799			182.98	38.0095	36.1698	38.7414	40.2824	39.7853	39.7403	39.1246	40.5266			182.98	35.7837	38.7648	40.796	41.2076	40.1973	39.1928	38.4497	40.3375
183.08	38.8655	37.3326	40.0102	40.8091	39.9532	40.6766	41.1787	42.2776			183.08	37.9827	36.167	38.735	40.2662	39.7739	39.7254	39.1078	40.4956			183.08	35.7837	38.7648	40.7802	41.1931	40.1824	39.1928	38.462	40.308
183.18	38.8454	37.3305	40.0102	40.7913	39.9347	40.6791	41.1803	42.2428			183.18	37.9425	36.1455	38.7387	40.2628	39.7739	39.7174	39.0931	40.4807			183.18	35.758	38.738	40.7326	41.1547	40.2001	39.1928	38.4169	40.3115
183.28	38.8709	37.3085	39.993	40.7786	39.9264	40.6546	41.1608	42.2312			183.28	37.8935	36.1313	38.7004	40.2134	39.7602	39.722	39.0966	40.4658			183.28	35.7997	38.6937	40.7296	41.1675	40.2047	39.1771	38.4434	40.2855
183.38	38.8728	37.3032	39.9805	40.7642	39.908	40.6369	41.1682	42.232			183.38	37.887	36.1171	38.6812	40.2031	39.759	39.6855	39.0595	40.4692			183.38	35.7517	38.6937	40.7326	41.1361	40.1898	39.1535	38.4263	40.2682
183.48	38.8234	37.2959	39.9832	40.7498	39.9025	40.632	41.1504	42.2011			183.48	37.887	36.0958	38.6683	40.1766	39.7454	39.6969	39.0606	40.4727			183.48	35.7517	38.6406	40.7168	41.1504	40.1675	39.1535	38.4263	40.2889
183.58	38.8181	37.2854	39.9608	40.7286	39.8887	40.6124	41.1382	42.2004			183.58	37.8537	36.0815	38.6339	40.1651	39.7077	39.6855	39.0516	40.4521			183.58	35.7901	38.6263	40.6932	41.129	40.1527	39.13	38.3984	40.2682
183.68	38.8181	37.2728	39.9455	40.7278	39.85	40.6076	41.1098	42.1856			183.68	37.8802	36.0602	38.6275	40.1479	39.7054	39.6683	39.0348	40.4485			183.68	35.8157	38.5838	40.6646	41.1147	40.1348	39.13	38.372	40.2769
183.78	38.8181	37.2697	39.9311	40.7176	39.8389	40.5816	41.1098	42.1795			183.78	37.869	36.0387	38.6108	40.1364	39.6769	39.6775	39.0147	40.4406			183.78	35.8477	38.5783	40.6504	41.0933	40.1228	39.0938	38.3565	40.2247
183.88	38.7998	37.254	39.9266	40.699	39.8343	40.5735	41.0855	42.171			183.88	37.8648	36.0387	38.63	40.1329	39.6859	39.6512	38.9955	40.4406			183.88	35.8093	38.5783	40.614	41.0976	40.1005	39.0875	38.3332	40.2509
183.98	38.8071	37.2414	39.9203	40.6711	39.8223	40.5613	41.0871	42.1509			183.98	37.8648	36.0188	38.6018	40.1479	39.6734	39.6512	38.9675	40.4234			183.98	35.7517	38.5997	40.6014	41.0789	40.1005	39.097	38.3175	40.2333
184.08	38.8234	37.2508	39.9177	40.6626	39.7947	40.5515	41.0555	42.1408			184.08	37.8602	35.9961	38.5941	40.119	39.6688	39.6479	38.9596	40.4061			184.08	35.7517	38.6049	40.5903	41.0575	40.0856	39.0749	38.2942	40.2073
184.18	38.8272	37.2436	39.9096	40.6498	39.7781	40.5345	41.0247	42.1216			184.18	37.8468	35.9961	38.598	40.0903	39.6541	39.6399	38.9416	40.3947			184.18	35.7901	38.5838	40.5745	41.0433	40.0633	39.0954	38.2942	40.1813
184.28	38.8052	37.2362	39.9007	40.6414	39.7873	40.5004	41.0182	42.1069			184.28	37.8001	35.9848	38.5853	40.065	39.6254	39.6136	38.9316	40.3913			184.28	35.8093	38.582	40.5508	41.0219	40.0485	39.0624	38.268	40.1849
184.38	38.7998	37.2382	39.8935	40.6287	39.7671	40.4882	40.9931	42.0821			184.38	37.8246	35.999	38.5699	40.0444	39.6427	39.6	38.9316	40.3833			184.38	35.806	38.5182	40.535	41.0219	40.026	39.0435	38.2477	40.19
184.48	38.754	37.2425	39.8728	40.5974	39.7652	40.4801	40.9817	42.0752			184.48	37.8314	35.9889	38.5366	40.0328	39.6254	39.5657	38.9057	40.3637			184.48	35.8157	38.5252	40.5111	41.0005	40.026	39.0326	38.2322	40.164
184.58	38.776	37.2205	39.8485	40.5965	39.7422	40.4663	40.9639	42.0521			184.58	37.8314	36.0004	38.5212	40.0328	39.614	39.5714	38.9057	40.3742			184.58	35.8157	38.4809	40.5111	40.9863	40.0111	39.0199	38.2197	40.164
184.68	38.7816	37.189	39.8351	40.5778	39.7338	40.4379	40.9396	42.0466			184.68	37.8089	35.9818	38.5174	40.0271	39.5832	39.5543	38.8686	40.3661			184.68	35.7997	38.4809	40.4765	40.9649	39.9888	38.9994	38.2167	40.1518
184.78	38.754	37.168	39.8423	40.5685	39.721	40.4329	40.9314	42.0405			184.78	37.7825	35.9647	38.5084	40.0098	39.5798	39.5292	38.8495	40.3489			184.78	35.8093	38.4541	40.4765	40.9863	39.9963	38.9964	38.1903	40.138
184.88	38.754	37.1544	39.8459	40.5609	39.7145	40.3964	40.9193	42.0242			184.88	37.7756	35.9561	38.502	40.0122	39.5684	39.5373	38.8383	40.358			184.88	35.7517	38.4541	40.4433	40.9605	39.974	38.957	38.1777	40.112
184.98	38.7395	37.1587	39.8153	40.555	39.6961	40.3826	40.9031	42.0119			184.98	37.7423	35.925	38.502	39.9845	39.5513	39.5088	38.8215	40.3397			184.98	35.7997	38.463	40.4716	40.8976	39.9294	38.9696	38.1421	40.112
185.08	38.7505	37.1722	39.8127	40.5254	39.6814	40.3762	40.8788	42.0112			185.08	37.7423	35.9463	38.4893	39.9833	39.5397	39.5088	38.8103	40.3203			185.08	35.7997	38.463	40.4558	40.9048	39.9145	38.9491	38.128	40.0771
185.18	38.714	37.1754	39.7831	40.5203	39.663	40.3485	40.8853	42.0119			185.18	37.7243	35.9463	38.4701	39.9697	39.5397	39.4939	38.7956	40.3351			185.18	35.7613	38.4187	40.4321	40.8934	39.9279	38.9334	38.1374	40.0511
185.28	38.7358	37.1554	39.7678	40.5143	39.6685	40.3404	40.8706	41.9787			185.28	37.7469	35.8922	38.4726	39.9443	39.5421	39.4802	38.7821	40.3203			185.28	35.7196	38.4046	40.4084	40.8721	39.9368	38.9099	38.097	40.0252
185.38	38.7304	37.1356	39.7678	40.5016	39.6501	40.3152	40.8521	41.971			185.38	37.7201	35.8892	38.4572	39.9501	39.5318	39.4517	38.7485	40.3087			185.38	35.7196	38.3744	40.3926	40.8463	39.922	38.8864	38.0954	40.0078
185.48	38.7358	37.123	39.7418	40.4932	39.6306	40.2933	40.8358	41.9594			185.48	37.7201	35.875	38.4228	39.9351	39.5226	39.4517	38.7237	40.3168			185.48	35.6332	38.3531	40.3688	40.822	39.8995	38.855	38.0769	40.0287
185.58	38.6682	37.1356	39.7445	40.4805	39.6132	40.2852	40.8269	41.947			185.58	37.7534	35.875	38.4252	39.9236	39.5364	39.4233	38.7204	40.3203			185.58	35.6556	38.3567	40.3688	40.822	39.8669	38.8312	38.038	40.0078
185.68	38.6628	37.123	39.732	40.4492	39.5892	40.273	40.8058	41.9332			185.68	37.7312	35.8537	38.4162	39.8949	39.5226	39.4062	38.7092	40.3087			185.68	35.6556	38.3299	40.353	40.8178	39.84	38.8501	37.9992	39.9905
185.78	38.6628	37.1156	39.723	40.4339	39.5965	40.2486	40.7888	41.9247			185.78	37.6979	35.8537	38.4085	39.9064	39.4975	39.4084	38.6923	40.2779			185.78	35.6236	38.3299	40.353	40.8077	39.8429	38.8674	37.9759	39.9383
185.88	38.6628	37.1073	39.7094	40.4356	39.5919	40.2405	40.7775	41.9131			185.88	37.6979	35.8395	38.4061	39.8891	39.477	39.3947	38.6811	40.2847			185.88	35.6363	38.3299	40.3372	40.8077	39.8595	38.855	37.9604	39.9523
185.98	38.6299	37.0947	39.7094	40.4381	39.5781	40.2299	40.7637	41.8914			185.98	37.6711	35.8253	38.3869	39.8777	39.4792	39.3833	38.6642	40.2801			185.98	35.6395	38.3034	40.3135	40.8077	39.8132	38.855	37.937	39.9383
186.08	38.6446	37.0759	39.6915	40.4187	39.5625	40.2226	40.7475	41.886			186.08	37.6309	35.7981	38.3869	39.8777	39.4519	39.3491	38.653	40.2663			186.08	35.6395	38.2768	40.3135	40.7864	39.7878	38.8312	37.8982	39.9123
186.18	38.6317	37.0601	39.6781	40.4238	39.5431	40.2064	40.7426	41.8667			186.18	37.6309	35.7966	38.3741	39.8603	39.4621	39.3321	38.6362	40.2515			186.18	35.6395	38.2856	40.3023	40.7935	39.7968	38.8155	37.8982	39.869
186.28	38.6135	37.0465	39.6538	40.4043	39.5274	40.1958	40.7264	41.8552			186.28	37.6087	35.8138	38.3548	39.8373	39.4427	39.3127	38.6059	40.2515			186.28	35.6652	38.2856	40.2898	40.7935	39.8029	38.8155	37.906	39.869
186.38	38.6116	37.0413	39.6287	40.3916	39.5182	40.1755	40.7264	41.8358			186.38	37.6087	35.818	38.3356	39.8373	39.4256	39.3035	38.5856	40.248			186.38	35.5979	38.2591	40.2661	40.7721	39.7804	38.8155	37.8362	39.843
186.48	38.617	37.013	39.6322	40.3746	39.5182	40.173	40.6988	41.8212			186.48	37.591	35.7824	38.3229	39.8201	39.4085	39.275	38.6047	40.2606			186.48	35.6236	38.2591	40.2501	40.7363	39.7433	38.792	37.8205	39.8256
186.58	38.5843	37.0108	39.6197	40.3586	39.5044	40.1455	40.6826	41.8141			186.58	37.5532	35.7611	38.3229	39.7994	39.3971	39.2579	38.5912	40.2458			186.58	35.5915	38.2591	40.2234	40.7149	39.721	38.7685	37.8205	39.7994
186.68	38.5896	36.9973	39.618	40.3466	39.5044	40.1325	40.6656	41.7987			186.68	37.5865	35.7469	38.3255	39.7971	39.38	39.2465	38.5711	40.2458			186.68	35.5915	38.2591	40.2217	40.7006	39.7061	38.7528	37.805	39.7821
186.78	38.5714	36.9836	39.609	40.3492	39.4924	40.1082	40.6616	41.7957			186.78	37.5777	35.7255	38.3101	39.7799	39.3627	39.243	38.552	40.2458			186.78	35.6395	38.2591	40.1948	40.7006	39.6838	38.726	37.7817	39.7561
186.88	38.5714	36.9742	39.5929	40.3365	39.4749	40.1008	40.6445	41.7833			186.88	37.5532	35.7141	38.3101	39.7649	39.3513	39.2181	38.552	40.2344			186.88	35.6011	38.2591	40.1632	40.7178	39.6613	38.7528	37.7817	39.7388
186.98	38.5934	36.9448	39.5929	40.3382	39.4418	40.0943	40.6316	41.774			186.98	37.5532	35.6969	38.2973	39.7374	39.3342	39.1963	38.524	40.2171			186.98	35.5915	38.1971	40.16	40.6837	39.6465	38.7292	37.7584	39.6868
187.08	38.577	36.9385	39.5839	40.3213	39.4261	40.0643	40.621	41.7493			187.08	37.5532	35.6756	38.2781	39.7166	39.3228	39.1838	38.5329	40.2056			187.08	35.5435	38.2148	40.1395	40.6964	39.6242	38.7449	37.7584	39.6606
187.18	38.5861	36.9479	39.5569	40.2925	39.4242	40.0513	40.6016	41.7385			187.18	37.5532	35.6756	38.246	39.7143	39.3057	39.1667	38.507	40.1885			187.18	35.5435	38.1971	40.1268	40.6793	39.5973	38.7449	37.7787	39.6503
[truncated: 2,934 more rows]

## Sheet: 3-sup1B
Replicate 1											Replicate 2											Replicate 3
[truncated: 4,797 more rows]
