# Supplementary material for: A point mutation in the nucleotide exchange factor eIF2B constitutively activates the integrated stress response by allosteric modulation
Source: eLife. 2022 Apr 13;11:e76171. doi: 10.7554/eLife.76171 (PMC9132573; doi:10.7554/eLife.76171)
Supplement: Figure 3—source data 1. [file elife-76171-fig3-data1.xlsx]

## Sheet: 3A
Time (s)	125	62.5	31.25	15.625	7.8125
-60.02*	-0.00464*	0.0056*	-0.0702972*	0.0421143*	0.0651093*		excluded data*
-59.92*	-0.00464*	0.0056*	-0.0585785*	0.0421143*	0.0651093*
-59.82*	-0.0124512*	-0.00221*	-0.066391*	0.022583*	0.0690155*
-59.72*	-0.0241699*	0.00169*	-0.066391*	0.0343018*	0.061203*
-59.62*	-0.0241699*	0.00169*	-0.0781097*	0.022583*	0.061203*
-59.52*	-0.0241699*	0.0095*	-0.066391*	0.022583*	0.0611959*
-59.42*	-0.0358887*	-0.00221*	-0.0781097*	0.0108643*	0.0494843*
-59.32*	-0.0241699*	-0.0139313*	-0.0781097*	0.022583*	0.0455828*
-59.22*	-0.0163574*	-0.00612*	-0.0742035*	0.0303955*	0.0533905*
-59.12*	-0.0241699*	-0.0139313*	-0.0898285*	0.0108643*	0.045578*
-59.02*	-0.0241699*	-0.0217438*	-0.0898285*	0.0303955*	0.0377655*
-58.92*	-0.0319824*	-0.0217438*	-0.0898285*	0.0303955*	0.0377655*
-58.82*	-0.0319824*	-0.0334625*	-0.0898285*	0.0186768*	0.0377655*
-58.72*	-0.0437012*	-0.0217438*	-0.097641*	0.0303955*	0.0377655*
-58.62*	-0.0437012*	-0.0217438*	-0.0898285*	0.0303955*	0.0377655*
-58.52*	-0.0437012*	-0.0217438*	-0.0898285*	0.0303955*	0.0377655*
-58.42*	-0.0437012*	-0.0217438*	-0.0898285*	0.0186768*	0.029953*
-58.32*	-0.0358887*	-0.0139313*	-0.082016*	0.0186768*	0.0377607*
-58.22*	-0.0515137*	-0.0334625*	-0.0898285*	0.0186768*	0.029953*
-58.12*	-0.0749512*	-0.0451813*	-0.0898285*	0.00696*	0.00652*
-58.02*	-0.0749512*	-0.0334625*	-0.0898285*	-0.000854*	0.014328*
-57.92*	-0.0671387*	-0.0334625*	-0.0898285*	-0.000854*	0.0260468*
-57.82*	-0.0554199*	-0.0451813*	-0.0898285*	-0.000854*	0.014328*
-57.72*	-0.0671387*	-0.0334625*	-0.0898285*	-0.000854*	0.0260468*
-57.62*	-0.0749512*	-0.041275*	-0.10936*	-0.000854*	0.0182343*
-57.52*	-0.0749512*	-0.052989*	-0.10936*	-0.000854*	0.0104265*
-57.42*	-0.0593262*	-0.0529938*	-0.101547*	0.0108643*	0.0182343*
-57.32*	-0.0632324*	-0.072525*	-0.128891*	0.00305*	0.0104265*
-57.22*	-0.0554199*	-0.0569*	-0.132797*	-0.0125732*	0.0182343*
-57.12*	-0.0554199*	-0.0647125*	-0.132797*	-0.0125732*	0.0182414*
-57.02*	-0.0437012*	-0.0647125*	-0.128891*	-0.000854*	0.0182343*
-56.92*	-0.0437012*	-0.0529938*	-0.14061*	-0.0125732*	0.0182343*
-56.82*	-0.0437012*	-0.0451813*	-0.132797*	0.00696*	0.0143352*
-56.72*	-0.0437012*	-0.041275*	-0.121078*	-0.000854*	0.029953*
-56.62*	-0.0241699*	-0.0217438*	-0.10936*	0.0303955*	0.0377655*
-56.52*	-0.0241699*	-0.0334506*	-0.121078*	-0.000854*	0.0299649*
-56.42*	-0.00464*	-0.0139313*	-0.121078*	0.00696*	0.045578*
-56.32*	-0.0124512*	-0.0178375*	-0.10936*	0.00305*	0.033864*
-56.22*	0.0148926*	-0.0139313*	-0.121078*	-0.00867*	0.029953*
-56.12*	0.0578613*	0.0251312*	-0.10936*	0.0303955*	0.0768328*
-56.02*	-0.0241699*	-0.0209584*	-0.101547*	0.00696*	0.0338664*
-55.92*	-0.0241699*	-0.0139313*	-0.0867004*	0.0186768*	0.0377655*
-55.82*	-0.0124512*	-0.0069*	-0.082016*	0.0186768*	0.049489*
-55.72*	-0.0163574*	-0.00612*	-0.082016*	0.0733643*	0.0572968*
-55.62*	0.0266113*	0.00951*	-0.0781097*	0.0460205*	0.0690203*
-55.52*	0.0406799*	0.0056*	-0.082016*	0.0288391*	0.0752749*
-55.42*	0.0398865*	0.00325*	-0.0702972*	0.0413208*	0.0760345*
-55.32*	0.0617676*	0.00404*	-0.0624847*	0.0405579*	0.0807357*
-55.22*	0.0773926*	0.00795*	-0.0679474*	0.0327454*	0.0776215*
-55.12*	0.0680237*	0.0188904*	-0.0491943*	0.0303955*	0.0807338*
-55.02*	0.0734863*	-0.000656*	-0.0413971*	0.0475769*	0.0979161*
-54.92*	0.0914612*	0.00795*	-0.0210724*	0.0639954*	0.106522*
-54.82*	0.0867615*	0.0173187*	-0.0117035*	0.0499268*	0.10963*
-54.72*	0.0969238*	0.0173187*	0.0000153*	0.0577393*	0.111984*
-54.62*	0.0883179*	0.0266876*	0.0187531*	0.0686646*	0.121353*
-54.52*	0.105515*	0.0391731*	0.039856*	0.0780487*	0.128376*
-54.42*	0.0984802*	0.0305939*	0.0421906*	0.0710144*	0.126816*
-54.32*	0.0875549*	0.0196686*	0.0453339*	0.0718079*	0.122139*
-54.22*	0.0867615*	0.0423126*	0.0406342*	0.0764771*	0.119797*
-54.12*	0.0914612*	0.0431061*	0.0609589*	0.0913391*	0.110405*
-54.02*	0.0617676*	0.0227661*	0.0562592*	0.0749207*	0.0846253*
-53.92*	0.0594177*	0.0196686*	0.0336151*	0.0874329*	0.0729218*
-53.82*	0.0547485*	0.00951*	0.0398712*	0.0928955*	0.0689926*
-53.72*	0.0305176*	0.000137*	0.0211029*	0.0811768*	0.0596466*
-53.62*	0.016449*	-0.000656*	0.0211029*	0.0616455*	0.0525923*
-53.52*	-0.00229*	-0.0233159*	0.00237*	0.0749359*	0.0385432*
-53.42*	-0.00854*	-0.0279999*	-0.00624*	0.0835266*	0.0315094*
-53.32*	-0.0397949*	-0.041275*	-0.0249786*	0.0843048*	0.0142985*
-53.22*	-0.0655823*	-0.0647125*	-0.0546722*	0.0546265*	-0.0247345*
-53.12*	-0.062439*	-0.0545502*	-0.0406036*	0.0499268*	-0.00287*
-53.02*	-0.0671387*	-0.0451913*	-0.0406036*	0.0577393*	0.00104*
-52.92*	-0.0718384*	-0.0475311*	-0.0398407*	0.069458*	0.00963*
-52.82*	-0.0741577*	-0.0701752*	-0.0390472*	0.069458*	0.00105*
-52.72*	-0.0749512*	-0.0514374*	-0.0366974*	0.0733643*	0.00417*
-52.62*	-0.0593262*	-0.0522003*	-0.0406036*	0.0600891*	0.0151105*
-52.52*	-0.0632324*	-0.0553508*	-0.0453033*	0.0616455*	0.000252*
-52.42*	-0.046051*	-0.0545502*	-0.0390472*	0.0632019*	0.00652*
-52.32*	-0.0343323*	-0.0522156*	-0.0413971*	0.0803833*	0.00807*
-52.22*	-0.0374451*	-0.0428314*	-0.0327911*	0.0819702*	0.0260468*
-52.12*	-0.0265198*	-0.041275*	-0.0374908*	0.053833*	0.00886*
-52.02*	-0.0124512*	-0.0412774*	-0.0390472*	0.0710144*	0.0182319*
-51.92*	0.00473*	-0.0162811*	-0.0234222*	0.0616455*	0.014328*
-51.82*	0.00787*	-0.0115814*	-0.019516*	0.0663452*	0.00652*
-51.72*	0.0336304*	-0.0139313*	-0.00233*	0.0803833*	0.00963*
-51.62*	0.0328674*	-0.00768*	-0.0031*	0.0757141*	0.00496*
-51.52*	0.0555115*	0.00873*	-0.0140533*	0.0905457*	0.019803*
-51.42*	0.104736*	0.0563812*	0.00237*	0.130402*	0.0596466*
-51.32*	0.124268*	0.083725*	0.00783*	0.137421*	0.0729179*
-51.22*	0.137543*	0.0876312*	0.00313*	0.131958*	0.0783844*
-51.12*	0.155518*	0.0860748*	0.0101776*	0.11087*	0.0690141*
-51.02*	0.169586*	0.0852861*	0.011734*	0.107742*	0.0533953*
-50.92*	0.196136*	0.111069*	0.0351715*	0.0796204*	0.0244904*
-50.82*	0.215668*	0.0876312*	0.0578156*	0.0460205*	0.0276046*
-50.72*	0.227386*	0.0735626*	0.0625153*	0.0460205*	0.0182343*
-50.62*	0.212555*	0.0782623*	0.0804901*	0.0632019*	0.0377655*
-50.52*	0.22583*	0.0891924*	0.0836029*	0.0366516*	0.0455828*
-50.42*	0.200836*	0.0899811*	0.0937653*	0.0280457*	0.0588531*
-50.32*	0.0992737*	0.0782623*	0.0883026*	0.00931*	0.0557375*
-50.22*	0.0437927*	0.0634003*	0.0992279*	0.0202332*	0.0572968*
-50.12*	0.0406799*	0.0626373*	0.102371*	0.00931*	0.0612063*
-50.02*	0.00787*	0.0587287*	0.10704*	0.0264893*	0.0572944*
-49.92*	0.00864*	0.0501251*	0.105484*	-0.0032*	0.0533905*
-49.82*	0.000824*	0.00951*	0.0836029*	-0.00867*	0.0260491*
-49.72*	-0.0140076*	0.00951*	0.0883026*	-0.0297546*	0.0182343*
-49.62*	0.0125427*	0.00951*	0.101578*	-0.0281982*	0.0245047*
-49.52*	0.0461426*	0.134503*	0.113297*	-0.0149231*	0.0510373*
-49.42*	0.0602112*	0.194656*	0.100021*	-0.0141296*	0.0572968*
-49.32*	-0.00854*	0.154037*	0.0156403*	-0.0633545*	-0.0146031*
-49.22*	-0.030426*	0.107162*	-0.0601349*	-0.0813293*	-0.0622406*
-49.12*	-0.0202637*	0.111069*	0.0148621*	-0.0438232*	0.0236983*
-49.02*	0.0539551*	0.129047*	0.0414276*	-0.0219421*	0.0385623*
-48.92*	0.0656738*	0.136063*	0.0507965*	-0.00476*	0.0471344*
-48.82*	0.0773926*	0.150131*	0.0664215*	-0.00476*	0.0557308*
-48.72*	0.0656738*	0.138412*	0.0468903*	-0.024292*	0.0354156*
-48.62*	0.0484924*	0.111862*	0.0336151*	-0.0375671*	0.0150962*
-48.52*	0.0227051*	0.0680928*	0.0171967*	-0.0500793*	-0.00599*
-48.42*	0.0398865*	0.0290375*	0.0179901*	-0.0766296*	-0.0223846*
-48.32*	0.0117798*	-0.00768*	-0.0327911*	-0.133667*	-0.0825377*
-48.22*	0.00238*	-0.0264435*	-0.0687408*	-0.0235138*	-0.105209*
-48.12*	0.0773926*	0.0329437*	-0.0531158*	0.0944519*	-0.0102511*
-48.02*	-0.454651*	-0.377308*	0.0836029*	0.320236*	-0.407627*
-47.92*	-1.10934*	-1.04207*	0.150009*	-1.23914*	-1.07474*
-47.82*	0.320358*	-0.0787659*	-0.0937347*	-0.436005*	0.287441*
-47.72*	0.335999*	0.243881*	0.0804901*	-0.143036*	0.224487*
-47.62*	0.338318*	0.243881*	0.089859*	-0.0719604*	0.105831*
-47.52*	0.107849*	-0.0084*	-0.0734253*	0.00851*	0.139392*
-47.42*	0.0117493*	0.121216*	-0.0078*	0.131958*	0.219009*
-47.32*	0.144562*	0.225906*	0.128128*	0.213196*	0.233012*
-47.22*	0.125046*	0.244659*	0.166428*	0.259308*	0.219803*
-47.12*	0.135223*	0.222015*	0.146118*	0.190552*	0.211155*
-47.02*	0.142242*	0.210258*	0.148453*	0.138214*	0.200233*
-46.92*	0.139893*	0.199356*	0.177368*	0.122589*	0.172928*
-46.82*	0.110977*	0.183716*	0.149231*	0.116333*	0.133804*
-46.72*	0.0828552*	0.155594*	0.159393*	0.108521*	0.113541*
-46.62*	0.0617676*	0.125137*	0.170334*	0.145248*	0.0830531*
-46.52*	0.0289612*	0.0899477*	0.160172*	0.171021*	0.0416384*
-46.42*	-0.015564*	0.0352936*	0.100021*	0.130402*	-0.0145721*
-46.32*	-0.00308*	0.0251312*	0.074234*	0.104614*	-0.0247297*
-46.22*	0.0398865*	0.0266876*	0.0703278*	0.128052*	-0.0231781*
-46.12*	0.0656738*	0.0431061*	0.058609*	0.138214*	-0.00911*
-46.02*	0.103943*	0.0727625*	0.0601654*	0.127258*	0.00807*
-45.92*	0.0797424*	0.0860748*	0.0398712*	0.121033*	0.00496*
-45.82*	0.0992737*	0.113419*	0.0406342*	0.120239*	0.0494785*
-45.72*	0.0969238*	0.122787*	0.0336151*	0.120239*	0.0572968*
-45.62*	0.0828552*	0.12825*	0.00548*	0.0944519*	0.0510316*
-45.52*	0.0563049*	0.109514*	-0.0132599*	0.0718079*	0.0440235*
-45.42*	0.0578613*	0.110275*	-0.0140533*	0.0905457*	0.0432281*
-45.32*	0.0594177*	0.0915375*	-0.019516*	0.0944519*	0.0315027*
-45.22*	0.0391083*	0.0884094*	-0.0367126*	0.0960236*	0.026825*
-45.12*	0.0187988*	0.0602875*	-0.050766*	0.0921173*	0.0182319*
-45.02*	0.016449*	0.0548368*	-0.0523224*	0.108521*	0.0221524*
-44.92*	0.0328674*	0.0759125*	-0.0179596*	0.126495*	0.0549469*
-44.82*	0.0258179*	0.0673065*	-0.0164032*	0.123352*	0.0494823*
-44.72*	0.031311*	0.0821686*	-0.0304413*	0.11087*	0.0416718*
-44.62*	0.0359802*	0.0813751*	-0.0374908*	0.104614*	0.0401034*
-44.52*	0.0148926*	0.0641985*	-0.0601349*	0.085083*	0.0315142*
-44.42*	0.0281677*	0.0665436*	-0.0398254*	0.0991516*	0.045578*
-44.32*	0.015686*	0.0485687*	-0.057785*	0.112427*	0.0479264*
-44.22*	0.016449*	0.0548248*	-0.0546722*	0.106964*	0.0471344*
-44.12*	0.0227051*	0.0540314*	-0.0429535*	0.120239*	0.0494828*
-44.02*	0.0305176*	0.0618525*	-0.0257721*	0.117889*	0.0276117*
-43.92*	0.0359802*	0.0681*	-0.0101471*	0.133514*	0.029953*
-43.82*	0.031311*	0.0587311*	0.00627*	0.122589*	0.0190263*
-43.72*	0.032074*	0.0563812*	-0.00389*	0.11087*	0.0158844*
-43.62*	0.0297241*	0.0618439*	0.0109406*	0.111633*	0.0299568*
-43.52*	0.0383301*	0.0563827*	0.0179901*	0.108521*	0.0260482*
-43.42*	0.0352173*	0.0681*	0.0218964*	0.11087*	0.0283966*
-43.32*	0.0437927*	0.0602875*	0.0289154*	0.106964*	0.0276113*
-43.22*	0.0594177*	0.0681*	0.0328217*	0.121796*	0.0315094*
-43.12*	0.0719299*	0.0626373*	0.0336151*	0.122589*	0.0323062*
-43.02*	0.0836487*	0.0681033*	0.0507965*	0.116333*	0.0377688*
-42.92*	0.078949*	0.0712128*	0.0640717*	0.111633*	0.0236969*
-42.82*	0.0852051*	0.0587311*	0.0609589*	0.120239*	0.0268388*
-42.72*	0.0914612*	0.0485687*	0.0859528*	0.126495*	0.0276031*
-42.62*	0.104736*	0.0391998*	0.0711212*	0.122589*	0.0385575*
-42.52*	0.104736*	0.0352983*	0.0664215*	0.117889*	0.0354204*
-42.42*	0.112549*	0.0329437*	0.0757904*	0.134308*	0.0549469*
-42.32*	0.104736*	0.0360565*	0.0718842*	0.121796*	0.0572901*
-42.22*	0.0953674*	0.0274811*	0.0609589*	0.0991516*	0.0479279*
-42.12*	0.102386*	0.0290375*	0.0765839*	0.106171*	0.0549431*
-42.02*	0.107849*	0.0227804*	0.0812531*	0.0944519*	0.0572958*
-41.92*	0.107086*	0.00951*	0.0820465*	0.0718079*	0.0494843*
-41.82*	0.106293*	-0.00221*	0.0820465*	0.0616455*	0.0377598*
-41.72*	0.10553*	-0.0131378*	0.0726776*	0.0522766*	0.0377655*
-41.62*	0.114105*	-0.00456*	0.0703278*	0.0475769*	0.0299578*
-41.52*	0.130524*	0.0056*	0.0664215*	0.0639954*	0.032299*
-41.42*	0.125824*	0.00871*	0.0695343*	0.0608521*	0.0197906*
-41.32*	0.124268*	0.00639*	0.0726776*	0.046814*	-0.00285*
-41.22*	0.133636*	0.0056*	0.0609589*	0.0671082*	0.00417*
-41.12*	0.12973*	-0.018631*	0.0523529*	0.0514832*	0.000266*
-41.02*	0.146149*	-0.0100212*	0.0718842*	0.053833*	0.0143318*
-40.92*	0.142242*	-0.00533*	0.0945587*	0.069458*	0.0166779*
-40.82*	0.143799*	-0.00221*	0.0976715*	0.0796204*	0.027616*
-40.72*	0.157074*	0.0165253*	0.118759*	0.0905457*	0.0572968*
-40.62*	0.175049*	0.0337372*	0.136734*	0.0968018*	0.0479336*
-40.52*	0.193024*	0.0462189*	0.148453*	0.100708*	0.045578*
-40.42*	0.203949*	0.0485687*	0.14064*	0.106964*	0.045578*
-40.32*	0.206299*	0.0485687*	0.146896*	0.106171*	0.0377655*
-40.22*	0.200836*	0.0548248*	0.142197*	0.100708*	0.0377655*
-40.12*	0.214111*	0.0681*	0.152359*	0.106964*	0.0377617*
-40.02*	0.217224*	0.0501184*	0.146103*	0.102264*	0.0315027*
-39.92*	0.208649*	0.0329437*	0.123459*	0.0928955*	0.0221405*
-39.82*	0.214111*	0.03685*	0.128922*	0.100708*	0.0377631*
-39.72*	0.210205*	0.0251312*	0.123459*	0.085083*	0.0401154*
-39.62*	0.210999*	0.0196686*	0.119553*	0.069458*	0.0283985*
-39.52*	0.209412*	0.0110664*	0.120316*	0.0632019*	0.0408821*
-39.42*	0.206299*	-0.00221*	0.121109*	0.0616455*	0.0377655*
-39.32*	0.218018*	0.00951*	0.127365*	0.0679016*	0.0494914*
-39.22*	0.229736*	0.0274811*	0.150009*	0.0733643*	0.0494843*
-39.12*	0.216461*	0.0188751*	0.153915*	0.053833*	0.0572896*
-39.02*	0.207855*	0.00951*	0.125015*	0.0343018*	0.0479326*
-38.92*	0.218018*	0.0235748*	0.139084*	0.0397644*	0.0666656*
-38.82*	0.215668*	0.0173187*	0.13829*	0.0577393*	0.0783844*
-38.72*	0.206299*	0.0266876*	0.148453*	0.0499268*	0.0807343*
-38.62*	0.195374*	0.0173187*	0.131271*	0.0405579*	0.0713673*
-38.52*	0.209412*	0.0227852*	0.126572*	0.0436707*	0.0627632*
-38.42*	0.206299*	0.0290375*	0.139084*	0.0499268*	0.0690155*
-38.32*	0.189117*	0.0259247*	0.119553*	0.0390015*	0.0659084*
-38.22*	0.204742*	0.0384064*	0.121109*	0.0592957*	0.0690155*
-38.12*	0.196136*	0.03685*	0.110947*	0.0632019*	0.0705724*
-38.02*	0.206299*	0.0313802*	0.113297*	0.0702515*	0.0596395*
-37.92*	0.189117*	0.00795*	0.110184*	0.0600891*	0.0479279*
-37.82*	0.180511*	0.00871*	0.124222*	0.0608521*	0.0526009*
-37.72*	0.193024*	0.0157623*	0.121109*	0.069458*	0.0690155*
-37.62*	0.189117*	0.0173187*	0.132828*	0.0718079*	0.0698123*
-37.52*	0.19223*	0.0313907*	0.14064*	0.0772705*	0.0862002*
-37.42*	0.200043*	0.0399628*	0.152359*	0.0921021*	0.0822906*
-37.32*	0.212555*	0.03685*	0.157822*	0.100708*	0.0885482*
-37.22*	0.214111*	0.0470123*	0.160965*	0.109314*	0.0971527*
-37.12*	0.198486*	0.0290375*	0.161728*	0.0928955*	0.0885515*
-37.02*	0.206299*	0.0251336*	0.17189*	0.110077*	0.0963616*
-36.92*	0.210205*	0.0188751*	0.170334*	0.116333*	0.109634*
-36.82*	0.206299*	0.000137*	0.158615*	0.0975952*	0.0987101*
-36.72*	0.216461*	-0.00377*	0.16954*	0.0944519*	0.100266*
-36.62*	0.210205*	-0.00847*	0.164078*	0.0913391*	0.10182*
-36.52*	0.205505*	-0.0139308*	0.142197*	0.0827332*	0.101822*
-36.42*	0.207092*	-0.0115814*	0.149246*	0.0811768*	0.102615*
-36.32*	0.206299*	-0.0233002*	0.14064*	0.0718079*	0.0815287*
-36.22*	0.210205*	-0.0201874*	0.132828*	0.0733643*	0.0885468*
-36.12*	0.200043*	-0.0279999*	0.122665*	0.0733643*	0.0940027*
-36.02*	0.195374*	-0.0506501*	0.103928*	0.0616455*	0.0807281*
-35.92*	0.188324*	-0.0592499*	0.103134*	0.0600891*	0.0791779*
-35.82*	0.186768*	-0.072525*	0.0961151*	0.0553894*	0.0651126*
-35.72*	0.180511*	-0.0686188*	0.118759*	0.0710144*	0.0799408*
-35.62*	0.171143*	-0.0592499*	0.122665*	0.0733643*	0.0791721*
-35.52*	0.159424*	-0.0717387*	0.121902*	0.0733643*	0.0807271*
-35.42*	0.156311*	-0.0803375*	0.121109*	0.0585327*	0.0776215*
-35.32*	0.149261*	-0.0826874*	0.118759*	0.0671082*	0.0682211*
-35.22*	0.145355*	-0.0818939*	0.130478*	0.0710144*	0.0783844*
-35.12*	0.13443*	-0.0826874*	0.119553*	0.0710144*	0.0752659*
-35.02*	0.135986*	-0.0920577*	0.100021*	0.0585327*	0.0690141*
-34.92*	0.130524*	-0.0858002*	0.0875092*	0.0577393*	0.0752716*
-34.82*	0.145355*	-0.072525*	0.107834*	0.0788269*	0.0885515*
-34.72*	0.143799*	-0.0670624*	0.132828*	0.0889893*	0.0846405*
-34.62*	0.135986*	-0.0529938*	0.128128*	0.0811768*	0.0877466*
-34.52*	0.124268*	-0.0623641*	0.11174*	0.0718079*	0.07762*
-34.42*	0.133636*	-0.0647125*	0.10704*	0.0788269*	0.0744781*
-34.32*	0.135986*	-0.049881*	0.114853*	0.0866394*	0.097909*
-34.22*	0.118805*	-0.0701752*	0.102371*	0.0702515*	0.0908966*
-34.12*	0.116455*	-0.0756378*	0.0922089*	0.069458*	0.0768266*
-34.02*	0.122711*	-0.0553389*	0.089859*	0.069458*	0.0830889*
-33.92*	0.141449*	-0.0506439*	0.10704*	0.0835266*	0.092453*
-33.82*	0.150055*	-0.0397186*	0.103928*	0.0827332*	0.0940056*
-33.72*	0.154724*	-0.0436249*	0.108597*	0.0788269*	0.0963593*
-33.62*	0.147705*	-0.0240936*	0.127365*	0.0811768*	0.0963593*
-33.52*	0.151611*	-0.0154934*	0.130478*	0.069458*	0.0979099*
-33.42*	0.146149*	-0.0311127*	0.123459*	0.0600891*	0.0908966*
-33.32*	0.145355*	-0.0240936*	0.115646*	0.0499268*	0.0948062*
-33.22*	0.141449*	-0.010025*	0.132034*	0.0553894*	0.111191*
-33.12*	0.146149*	-0.010025*	0.132828*	0.0514832*	0.115891*
-33.02*	0.139893*	-0.0123701*	0.134384*	0.053833*	0.119802*
-32.92*	0.145355*	0.00404*	0.139084*	0.0679016*	0.136978*
-32.82*	0.159424*	0.0266876*	0.152359*	0.0616455*	0.157303*
-32.72*	0.146149*	0.021225*	0.161728*	0.0710144*	0.151047*
-32.62*	0.155518*	0.03685*	0.162521*	0.0639954*	0.158858*
-32.52*	0.150055*	0.0368571*	0.154709*	0.0679016*	0.153404*
-32.42*	0.164886*	0.0548248*	0.167984*	0.069458*	0.166672*
-32.32*	0.155518*	0.0485687*	0.160172*	0.0671082*	0.176037*
-32.22*	0.150818*	0.0423126*	0.163284*	0.0632019*	0.164322*
-32.12*	0.146149*	0.0407562*	0.152359*	0.053833*	0.169022*
-32.02*	0.139893*	0.0407505*	0.158615*	0.0421143*	0.170572*
-31.92*	0.128174*	0.0290375*	0.14299*	0.0327454*	0.170578*
-31.82*	0.122711*	0.0290375*	0.13829*	0.022583*	0.158859*
-31.72*	0.116455*	0.0274811*	0.14064*	0.022583*	0.158859*
-31.62*	0.112549*	0.03685*	0.14064*	0.0303955*	0.166675*
-31.52*	0.118011*	0.0399618*	0.155472*	0.0358582*	0.172133*
-31.42*	0.118011*	0.0407562*	0.162521*	0.0405579*	0.158859*
-31.32*	0.116455*	0.0431061*	0.160172*	0.0499268*	0.176048*
-31.22*	0.120361*	0.0563812*	0.17189*	0.0616455*	0.182297*
-31.12*	0.114899*	0.0579376*	0.181259*	0.0616455*	0.182297*
-31.02*	0.125824*	0.066545*	0.164078*	0.0710144*	0.176836*
-30.92*	0.110992*	0.0587311*	0.172684*	0.0639954*	0.172928*
-30.82*	0.110992*	0.0641937*	0.179703*	0.069458*	0.187759*
-30.72*	0.114105*	0.0657501*	0.167984*	0.069458*	0.178391*
-30.62*	0.124268*	0.0876312*	0.179703*	0.0889893*	0.204179*
-30.52*	0.118805*	0.0899796*	0.182053*	0.0913391*	0.208083*
-30.42*	0.114105*	0.0915375*	0.167984*	0.0952454*	0.197922*
-30.32*	0.130524*	0.103256*	0.185165*	0.0968018*	0.205741*
-30.22*	0.153168*	0.116531*	0.191422*	0.108521*	0.217453*
-30.12*	0.155518*	0.108719*	0.181259*	0.110077*	0.228384*
-30.02*	0.176605*	0.125144*	0.191422*	0.108521*	0.229179*
-29.92*	0.204742*	0.138412*	0.195328*	0.120239*	0.240891*
-29.82*	0.215668*	0.155594*	0.209396*	0.120239*	0.24871*
-29.72*	0.229736*	0.16185*	0.222672*	0.131958*	0.266678*
-29.62*	0.224274*	0.156387*	0.222672*	0.120239*	0.260427*
-29.52*	0.233643*	0.165756*	0.239853*	0.137421*	0.268234*
-29.42*	0.243011*	0.154037*	0.242203*	0.128052*	0.256516*
-29.32*	0.224274*	0.154037*	0.232834*	0.118683*	0.247152*
-29.22*	0.235199*	0.157944*	0.23674*	0.120239*	0.256516*
-29.12*	0.22583*	0.157944*	0.238297*	0.108521*	0.238545*
-29.02*	0.233643*	0.172009*	0.255478*	0.116333*	0.244793*
-28.92*	0.22583*	0.167313*	0.251572*	0.110077*	0.236984*
-28.82*	0.243805*	0.181381*	0.256271*	0.118683*	0.254949*
-28.72*	0.236755*	0.167313*	0.239853*	0.0905457*	0.238541*
-28.62*	0.237549*	0.169662*	0.251572*	0.100708*	0.248703*
-28.52*	0.237549*	0.179031*	0.253922*	0.102264*	0.230728*
-28.42*	0.229736*	0.181381*	0.242203*	0.104614*	0.229172*
-28.32*	0.229736*	0.187637*	0.23439*	0.0928955*	0.229179*
-28.22*	0.235992*	0.189194*	0.246109*	0.104614*	0.233078*
-28.12*	0.245361*	0.197006*	0.242203*	0.118683*	0.240885*
-28.02*	0.237549*	0.187636*	0.232834*	0.0991516*	0.23152*
-27.92*	0.237549*	0.194656*	0.230484*	0.0968018*	0.217453*
-27.82*	0.237549*	0.197006*	0.230484*	0.0889893*	0.217453*
-27.72*	0.237549*	0.189194*	0.230484*	0.0983582*	0.209641*
-27.62*	0.22583*	0.189194*	0.222672*	0.0889893*	0.197922*
-27.52*	0.232086*	0.18919*	0.217209*	0.0889893*	0.197918*
-27.42*	0.227386*	0.182938*	0.212509*	0.0749207*	0.191666*
-27.32*	0.237549*	0.1931*	0.222672*	0.085083*	0.190109*
-27.22*	0.237549*	0.1931*	0.222672*	0.085083*	0.190109*
-27.12*	0.245361*	0.19545*	0.230484*	0.0811768*	0.190104*
-27.02*	0.224274*	0.187636*	0.213303*	0.078064*	0.180739*
-26.92*	0.243011*	0.185287*	0.199234*	0.069458*	0.178391*
-26.82*	0.235992*	0.194656*	0.199234*	0.0577393*	0.178398*
-26.72*	0.245361*	0.208725*	0.210953*	0.0616455*	0.178391*
-26.62*	0.243011*	0.208725*	0.199234*	0.0616455*	0.169022*
-26.52*	0.245361*	0.208725*	0.199234*	0.0499268*	0.158859*
-26.42*	0.237549*	0.208725*	0.199234*	0.038208*	0.158859*
-26.32*	0.239105*	0.202469*	0.192978*	0.0397644*	0.158072*
-26.22*	0.249268*	0.212631*	0.20314*	0.0421143*	0.170578*
-26.12*	0.237549*	0.212631*	0.20314*	0.0421143*	0.170578*
-26.02*	0.246918*	0.212631*	0.20079*	0.0303955*	0.162766*
-25.92*	0.249268*	0.200912*	0.20314*	0.0303955*	0.151047*
-25.82*	0.237549*	0.189194*	0.183609*	0.0202332*	0.139335*
-25.72*	0.267242*	0.200912*	0.183609*	0.0343018*	0.143234*
-25.62*	0.268799*	0.200912*	0.183609*	0.022583*	0.143234*
-25.52*	0.262543*	0.200912*	0.195328*	0.0054*	0.131516*
-25.42*	0.249268*	0.200912*	0.183609*	0.00305*	0.131516*
-25.32*	0.249268*	0.200912*	0.17424*	-0.00867*	0.110422*
-25.22*	0.232086*	0.191544*	0.17189*	-0.0180359*	0.0908966*
-25.12*	0.229736*	0.177475*	0.154709*	-0.0203857*	0.076828*
-25.02*	0.208649*	0.179825*	0.150009*	-0.0203857*	0.0690155*
-24.92*	0.206299*	0.165756*	0.152359*	-0.0203857*	0.0690155*
-24.82*	0.22348*	0.1884*	0.148453*	0.00226*	0.0744748*
-24.72*	0.200836*	0.169662*	0.132828*	-0.00476*	0.061203*
-24.62*	0.198486*	0.169662*	0.142197*	-0.00476*	0.061203*
-24.52*	0.198486*	0.169662*	0.123459*	-0.0164795*	0.0494843*
-24.42*	0.180511*	0.169662*	0.113297*	-0.0164795*	0.0432281*
-24.32*	0.167236*	0.169662*	0.101578*	-0.0164795*	0.0221453*
-24.22*	0.175049*	0.177475*	0.10939*	-0.0164795*	0.029953*
-24.12*	0.167236*	0.169662*	0.10939*	-0.0164795*	0.0182343*
-24.02*	0.167236*	0.160301*	0.101578*	-0.0164795*	0.0104289*
-23.92*	0.169586*	0.163406*	0.101578*	0.00305*	0.0127716*
-23.82*	0.167236*	0.16185*	0.101578*	-0.00632*	-0.0013*
-23.72*	0.167236*	0.169662*	0.0937653*	-0.00867*	-0.0013*
-23.62*	0.167236*	0.168106*	0.0937653*	-0.0102234*	0.00497*
-23.52*	0.167236*	0.172018*	0.0961151*	0.00305*	0.00417*
-23.42*	0.176605*	0.179031*	0.103134*	-0.00555*	0.000259*
-23.32*	0.169586*	0.179825*	0.113297*	-0.00632*	0.0104218*
-23.22*	0.167236*	0.171219*	0.113297*	-0.00867*	0.00261*
-23.12*	0.167236*	0.169662*	0.121109*	-0.00867*	-0.00911*
-23.02*	0.167236*	0.16967*	0.11174*	-0.00867*	-0.0091*
-22.92*	0.167236*	0.172012*	0.10704*	0.00305*	0.00261*
-22.82*	0.175049*	0.171219*	0.121109*	0.0108643*	-0.0106659*
-22.72*	0.175049*	0.157944*	0.113297*	0.0108643*	-0.00365*
-22.62*	0.168793*	0.157944*	0.113297*	0.0108643*	0.0104218*
-22.52*	0.167236*	0.148575*	0.101578*	0.0108643*	0.0104218*
-22.42*	0.157867*	0.146225*	0.101578*	0.0108643*	0.0104218*
-22.32*	0.155518*	0.139969*	0.101578*	0.0108643*	-0.0013*
-22.22*	0.155518*	0.138412*	0.101578*	0.0015*	-0.00285*
-22.12*	0.147705*	0.129044*	0.101578*	-0.0125732*	-0.0013*
-22.02*	0.147705*	0.126694*	0.089859*	-0.0125732*	-0.0013*
-21.92*	0.147705*	0.126694*	0.089859*	-0.0188293*	-0.00755*
-21.82*	0.153961*	0.125137*	0.0961151*	-0.0141296*	-0.0145712*
-21.72*	0.143799*	0.126694*	0.0976715*	-0.0125732*	-0.0130157*
-21.62*	0.143799*	0.120438*	0.0976715*	-0.0203857*	-0.0223789*
-21.52*	0.153168*	0.107171*	0.0992279*	-0.0110168*	-0.015357*
-21.42*	0.167236*	0.118881*	0.113297*	-0.00632*	-0.00911*
-21.32*	0.173492*	0.125137*	0.119553*	-0.00241*	-0.0122156*
-21.22*	0.184418*	0.118881*	0.130478*	-0.0032*	-0.00365*
-21.12*	0.177399*	0.112625*	0.132828*	-0.00711*	-0.00755*
-21.02*	0.175049*	0.111073*	0.132828*	-0.00867*	-0.0184746*
-20.92*	0.173492*	0.117325*	0.127365*	-0.00241*	-0.0145721*
-20.82*	0.175049*	0.0977936*	0.119553*	-0.0102234*	-0.01301*
-20.72*	0.178162*	0.104813*	0.120316*	-0.0032*	-0.0099*
-20.62*	0.175049*	0.0970001*	0.128922*	0.000702*	-0.00129*
-20.52*	0.175049*	0.116533*	0.121109*	-0.000854*	-0.0013*
-20.42*	0.157074*	0.109512*	0.121109*	-0.000854*	-0.0130157*
-20.32*	0.173492*	0.113419*	0.132828*	0.00931*	0.00496*
-20.22*	0.16568*	0.108719*	0.132828*	0.00461*	0.00652*
-20.12*	0.155518*	0.107162*	0.132828*	-0.00867*	0.00653*
-20.02*	0.172699*	0.11498*	0.157822*	-0.000854*	0.0354209*
-19.92*	0.181305*	0.121231*	0.157059*	0.0054*	0.0377655*
-19.82*	0.182861*	0.120438*	0.167984*	0.0108643*	0.0494843*
-19.72*	0.182861*	0.109512*	0.161728*	-0.000854*	0.0401154*
-19.62*	0.178162*	0.116531*	0.160172*	0.00851*	0.0471358*
-19.52*	0.169586*	0.118881*	0.160172*	-0.000854*	0.0432281*
-19.42*	0.167236*	0.118881*	0.14299*	-0.000854*	0.0323029*
-19.32*	0.167236*	0.113419*	0.146896*	-0.00241*	0.0362101*
-19.22*	0.157867*	0.105606*	0.142197*	-0.0102234*	0.0377655*
-19.12*	0.143799*	0.0954437*	0.131271*	-0.024292*	0.0284023*
-19.02*	0.153168*	0.0985579*	0.13829*	-0.0149231*	0.0354171*
-18.92*	0.155518*	0.0876312*	0.128922*	-0.0125732*	0.0315094*
-18.82*	0.140686*	0.0806122*	0.131271*	-0.0102234*	0.0323062*
-18.72*	0.143799*	0.0696564*	0.130478*	-0.0125732*	0.0283966*
-18.62*	0.137543*	0.0618439*	0.114853*	-0.0188293*	0.0197897*
-18.52*	0.135986*	0.0602875*	0.113297*	-0.0203857*	0.00652*
-18.42*	0.135986*	0.0548248*	0.113297*	-0.0227356*	0.0182343*
-18.32*	0.155518*	0.0743561*	0.110184*	-0.00241*	0.029954*
-18.22*	0.147705*	0.0759125*	0.118759*	-0.000854*	0.0182343*
-18.12*	0.147705*	0.0759125*	0.121109*	0.00851*	0.0182447*
-18.02*	0.143799*	0.08529*	0.130478*	0.0280457*	0.0354242*
-17.92*	0.155518*	0.09935*	0.144547*	0.0405579*	0.0494843*
-17.82*	0.155518*	0.0876312*	0.123459*	0.0303955*	0.0494843*
-17.72*	0.155518*	0.0759125*	0.121109*	0.0241394*	0.0416718*
-17.62*	0.141449*	0.0681*	0.103134*	0.022583*	0.0323029*
-17.52*	0.139893*	0.0680943*	0.0922089*	0.022583*	0.0299473*
-17.42*	0.130524*	0.0470123*	0.0633087*	0.0132141*	0.00261*
-17.32*	0.114899*	0.052475*	0.0601654*	0.00931*	0.00652*
-17.22*	0.106293*	0.0446625*	0.058609*	0.00696*	-0.0106659*
-17.12*	0.125824*	0.0634003*	0.058609*	0.0202332*	0.00572*
-17.02*	0.107086*	0.0681071*	0.058609*	0.022583*	-0.0106587*
-16.92*	0.118011*	0.0720062*	0.0625153*	0.0343018*	-0.00911*
-16.82*	0.110992*	0.0602875*	0.0562592*	0.022583*	-0.00912*
-16.72*	0.0875549*	0.0509186*	0.05159*	0.0132141*	-0.0301971*
-16.62*	0.0867615*	0.0391998*	0.0406342*	0.0186768*	-0.032547*
-16.52*	0.0773926*	0.0345035*	0.0390778*	0.0186768*	-0.0231748*
-16.42*	0.0734863*	0.0423126*	0.0507965*	0.0241394*	-0.0153656*
-16.32*	0.0672302*	0.0290375*	0.0507965*	0.0108643*	-0.0286407*
-16.22*	0.0617676*	0.021225*	0.0523529*	0.0108643*	-0.0223846*
-16.12*	0.0641174*	0.0290375*	0.0625153*	0.0280457*	-0.0270844*
-16.02*	0.0594177*	0.0173187*	0.0625153*	0.022583*	-0.0286407*
-15.92*	0.0461426*	0.0173187*	0.0507965*	0.0288391*	-0.0286407*
-15.82*	0.0406799*	0.0196686*	0.0531464*	0.0327454*	-0.0380111*
-15.72*	0.0383301*	0.00951*	0.0507965*	0.0303955*	-0.0341034*
-15.62*	0.0266113*	0.0157623*	0.0507965*	0.0280457*	-0.0403595*
-15.52*	0.0187988*	0.0056*	0.0297089*	0.0288391*	-0.0520821*
-15.42*	0.0125427*	-0.000656*	0.0211029*	0.0124207*	-0.0489655*
-15.32*	0.0187988*	0.00716*	0.027359*	0.0280457*	-0.0403652*
-15.22*	0.00943*	0.000137*	0.0101776*	0.0132141*	-0.055191*
-15.12*	-0.00464*	-0.0139313*	0.00783*	0.0171204*	-0.0466194*
-15.02*	-0.0108948*	-0.0108123*	0.00157*	0.0217896*	-0.0583282*
-14.92*	-0.00854*	-0.0178375*	0.00938*	0.022583*	-0.0598907*
-14.82*	-0.0179138*	-0.0272064*	0.00237*	0.0194702*	-0.063005*
-14.72*	-0.0257263*	-0.0350189*	0.0000153*	0.0280457*	-0.0622406*
-14.62*	-0.0241699*	-0.041275*	-0.0078*	0.0303955*	-0.0716105*
-14.52*	-0.0257263*	-0.0334678*	-0.0031*	0.038208*	-0.0716147*
-14.42*	-0.0249634*	-0.0397186*	-0.0218658*	0.0303955*	-0.0833282*
-14.32*	-0.0124512*	-0.0233002*	-0.00233*	0.0397644*	-0.0833282*
-14.22*	-0.0062*	-0.0334625*	0.0000153*	0.0421143*	-0.0817719*
-14.12*	-0.0101013*	-0.0217438*	-0.00545*	0.0390015*	-0.0708127*
-14.02*	-0.0163574*	-0.0217438*	-0.00233*	0.038208*	-0.063797*
-13.92*	-0.00699*	-0.0217438*	0.0000153*	0.0280457*	-0.0755157*
-13.82*	-0.0108948*	-0.0217438*	-0.00624*	0.0186768*	-0.0723968*
-13.72*	-0.000732*	-0.0217438*	0.0101776*	0.0108643*	-0.0536346*
-13.62*	-0.0124512*	-0.0123749*	0.00392*	0.00851*	-0.0520782*
-13.52*	-0.0062*	-0.010026*	0.00392*	0.00305*	-0.0505228*
-13.42*	-0.0140076*	-0.0193939*	0.0000153*	-0.00867*	-0.0497284*
-13.32*	-0.00699*	-0.0154877*	0.0000153*	-0.0203857*	-0.045826*
-13.22*	-0.0226135*	-0.0201874*	-0.00624*	-0.0281982*	-0.0528717*
-13.12*	-0.0257263*	-0.0240936*	-0.0078*	-0.0305481*	-0.0520768*
-13.02*	-0.0241699*	-0.0311141*	-0.00545*	-0.0274048*	-0.0575423*
-12.92*	-0.0241699*	-0.041275*	-0.0078*	-0.0188293*	-0.0505219*
-12.82*	-0.0163574*	-0.0240936*	-0.00545*	-0.0141296*	-0.0458221*
-12.72*	-0.00699*	-0.0217438*	0.00548*	-0.024292*	-0.0348969*
-12.62*	-0.0062*	-0.0272064*	0.00783*	-0.0149231*	-0.0262947*
-12.52*	-0.0108948*	-0.0319033*	0.0000153*	-0.0110168*	-0.0309877*
-12.42*	-0.0179138*	-0.0350189*	0.00627*	-0.00241*	-0.0247345*
-12.32*	-0.0132446*	-0.0303497*	-0.0101471*	-0.00946*	-0.0270853*
-12.22*	-0.0202637*	-0.0233002*	-0.00233*	-0.0102234*	-0.0403595*
-12.12*	-0.0350952*	-0.0428314*	-0.0171661*	-0.0203857*	-0.0497227*
-12.02*	-0.0241699*	-0.0240936*	-0.0078*	-0.00241*	-0.0341034*
-11.92*	-0.0241699*	-0.0217438*	-0.019516*	-0.0203857*	-0.032547*
-11.82*	-0.0358887*	-0.0389252*	-0.019516*	-0.0203857*	-0.0419173*
-11.72*	-0.0358887*	-0.0350189*	-0.0210724*	-0.039917*	-0.0466156*
-11.62*	-0.0296326*	-0.02565*	-0.0117035*	-0.0258484*	-0.0364571*
-11.52*	-0.0249634*	-0.022531*	-0.0179596*	-0.0211792*	-0.0505157*
-11.42*	-0.0241699*	-0.0217438*	-0.0101471*	-0.0203857*	-0.0341034*
-11.32*	-0.0202637*	-0.010025*	0.0101776*	-0.0164795*	-0.0114651*
-11.22*	-0.0233765*	-0.0193939*	0.00237*	-0.0258484*	-0.0301971*
-11.12*	-0.00699*	-0.00768*	0.00783*	-0.0258484*	-0.0153584*
-11.02*	-0.00464*	-0.00222*	0.011734*	-0.0032*	-0.00286*
-10.92*	-0.0108948*	0.0009*	-0.00624*	-0.00711*	-0.0192719*
-10.82*	-0.0124512*	0.00169*	0.00157*	0.000702*	-0.0114603*
-10.72*	-0.0124512*	0.00951*	-0.00935*	-0.00632*	-0.0122223*
-10.62*	0.00552*	0.021225*	0.00627*	0.00931*	-0.0013*
-10.52*	0.000824*	0.00325*	-0.00624*	0.00461*	0.00181*
-10.42*	0.00864*	0.00795*	0.00157*	0.000702*	-0.00285*
-10.32*	-0.00229*	0.00795*	0.00237*	0.0015*	-0.0013*
-10.22*	-0.0140076*	0.0056*	-0.0210724*	-0.0117798*	-0.0106659*
-10.12*	-0.0163574*	-0.0123749*	-0.0234222*	-0.0188293*	-0.0309844*
-10.02*	0.00473*	-0.00377*	-0.0117035*	-0.0203857*	-0.020834*
-9.91998*	-0.00229*	-0.0115814*	-0.019516*	-0.0203857*	-0.0145721*
-9.82001*	-0.0226135*	-0.0225372*	-0.0257721*	-0.0266418*	-0.0309844*
-9.72003*	-0.0140076*	-0.010025*	-0.0179596*	-0.0281982*	-0.0114594*
-9.62*	-0.0124512*	-0.010025*	-0.00935*	-0.0281982*	-0.00285*
-9.52002*	-0.00699*	0.00404*	0.0000153*	-0.0219421*	0.00652*
-9.41998*	-0.00308*	0.0056*	0.00157*	-0.0110168*	0.00652*
-9.32001*	0.00162*	0.00951*	0.00627*	-0.00632*	0.0182328*
-9.22003*	0.00552*	-0.00221*	0.0101776*	-0.00867*	0.0104218*
-9.12*	-0.00464*	0.00716*	0.0000153*	0.000702*	0.0166826*
-9.02002*	0.0125427*	0.0173187*	0.00783*	0.0186768*	0.0260468*
-8.91998*	0.0148926*	0.0157623*	0.0171967*	0.0249329*	0.0354156*
-8.82001*	0.0148926*	0.0173187*	0.00783*	0.0186768*	0.0377688*
-8.72003*	0.0187988*	0.0110626*	0.011734*	0.0241394*	0.0315094*
-8.62*	0.0187988*	0.0188751*	0.011734*	0.022583*	0.0362034*
-8.52002*	0.00708*	0.0181069*	0.011734*	0.022583*	0.0205789*
-8.41998*	0.000824*	0.0110626*	0.00548*	0.00461*	0.021347*
-8.32001*	0.00552*	-0.00221*	0.00392*	0.00931*	0.0221453*
-8.22003*	0.0148926*	-0.00221*	0.0179901*	0.0186768*	0.0276031*
-8.12*	0.00552*	-0.00221*	-0.00154*	0.0015*	0.0205827*
-8.02002*	0.00473*	-0.00221*	0.00548*	-0.000854*	0.0244975*
-7.91998*	0.0187988*	-0.00221*	0.011734*	0.0108643*	0.029953*
-7.82001*	0.00708*	0.00404*	0.0211029*	-0.000854*	0.0299578*
-7.72003*	0.0148926*	0.0056*	0.0195465*	0.0163269*	0.0377655*
-7.62*	0.0117798*	0.0056*	0.0164337*	0.0015*	0.0377641*
-7.52002*	0.0109863*	0.00561*	-0.00389*	-0.0125732*	0.0377727*
-7.41998*	0.0109863*	0.0235748*	0.00783*	-0.000854*	0.0440216*
-7.32001*	0.0140991*	0.00716*	0.00157*	-0.00711*	0.048697*
-7.22003*	0.0187988*	0.0266876*	0.0211029*	0.00931*	0.0494843*
-7.12*	0.0187988*	0.0290375*	0.0156403*	0.00461*	0.0494843*
-7.02002*	0.0281677*	0.0384054*	0.00392*	0.0015*	0.0479269*
-6.91998*	0.0172424*	0.0391998*	0.00237*	0.0015*	0.0479279*
-6.82001*	0.0148926*	0.0352936*	-0.00545*	-0.0125732*	0.0432243*
-6.72003*	0.00864*	0.0305939*	-0.00859*	-0.00946*	0.0315094*
-6.62*	0.0250549*	0.0384064*	0.00392*	0.00305*	0.0479279*
-6.52002*	0.0187988*	0.0407553*	-0.0078*	0.00305*	0.0494833*
-6.41998*	0.0172424*	0.0391998*	-0.0031*	0.0015*	0.0572968*
-6.32001*	0.0148926*	0.03685*	-0.00233*	-0.0125732*	0.0549469*
-6.22003*	0.0148926*	0.0431061*	0.0000153*	-0.00632*	0.0572968*
-6.12*	0.0359802*	0.0563812*	0.0000153*	-0.000854*	0.0752716*
-6.02002*	0.0383301*	0.0485578*	0.0000153*	-0.000854*	0.076817*
-5.91998*	0.0203552*	0.0188751*	-0.0179596*	-0.00946*	0.068222*
-5.82001*	0.0367737*	0.0266876*	-0.0156097*	-0.00867*	0.0807343*
-5.72003*	0.0266113*	0.0290375*	-0.0078*	-0.00867*	0.061203*
-5.62*	0.0250549*	0.0196686*	-0.00935*	-0.000854*	0.0659084*
-5.52002*	0.0266113*	0.0290494*	0.0000153*	0.00305*	0.0768399*
-5.41998*	0.0461426*	0.0485687*	0.0211029*	0.0171204*	0.0979156*
-5.32001*	0.0281677*	0.03685*	0.0234528*	0.0124207*	0.0940156*
-5.22003*	0.047699*	0.0407562*	0.0234528*	0.022583*	0.092453*
-5.12*	0.0500488*	0.0485687*	0.0234528*	0.0303955*	0.106522*
-5.02002*	0.0406799*	0.0485759*	0.0234528*	0.0303955*	0.108085*
-4.91998*	0.047699*	0.0485687*	0.0234528*	0.0280457*	0.108078*
-4.82001*	0.046936*	0.0548248*	0.0297089*	0.0327454*	0.106523*
-4.72003*	0.0437927*	0.0657501*	0.0312653*	0.0249329*	0.108078*
-4.62*	0.0539551*	0.0759125*	0.027359*	0.0186768*	0.115887*
-4.52002*	0.0398865*	0.0618501*	0.0132904*	0.0217896*	0.103384*
-4.41998*	0.0500488*	0.0665436*	0.011734*	0.0264893*	0.111984*
-4.32001*	0.0383301*	0.0602875*	0.011734*	0.0147705*	0.106516*
-4.22003*	0.0289612*	0.0329437*	-0.00545*	-0.00632*	0.0987091*
-4.12*	0.0344238*	0.0157623*	-0.0179596*	-0.00867*	0.104172*
-4.02002*	0.0172424*	0.00561*	-0.0132599*	-0.0203857*	0.105735*
-3.91998*	0.0266113*	0.0110626*	-0.00624*	-0.0258484*	0.119797*
-3.82001*	0.0109863*	-0.0115814*	-0.0171661*	-0.0492859*	0.10808*
-3.72003*	0.0125427*	-0.0178375*	-0.0140533*	-0.0461731*	0.104172*
-3.62*	0.00708*	-0.00456*	-0.0078*	-0.039917*	0.100266*
-3.52002*	0.00708*	-0.0193939*	-0.0078*	-0.039917*	0.109634*
-3.41998*	-0.00229*	-0.0123749*	-0.0078*	-0.0492859*	0.106522*
-3.32001*	-0.0140076*	-0.0404816*	-0.0171661*	-0.0492859*	0.0987029*
-3.22003*	-0.0241699*	-0.0529938*	-0.0273285*	-0.071167*	0.0822906*
-3.12*	-0.014801*	-0.0436249*	-0.0101471*	-0.0602417*	0.0846491*
-3.02002*	-0.000732*	-0.0295467*	-0.0132599*	-0.055542*	0.100275*
-2.91998*	0.0148926*	-0.0319061*	-0.0117035*	-0.039917*	0.125259*
-2.82001*	0.0101929*	-0.041275*	-0.0101471*	-0.0383606*	0.113553*
-2.72003*	0.0195923*	-0.0428314*	0.0101776*	-0.0297546*	0.11824*
-2.62*	0.0148926*	-0.0303497*	0.0195465*	-0.0227356*	0.12762*
-2.52002*	0.0242615*	-0.0444031*	0.0289154*	-0.0125732*	0.127609*
-2.41998*	0.0109863*	-0.0631561*	0.0390778*	-0.0125732*	0.114334*
-2.32001*	-0.015564*	-0.101425*	0.02034*	-0.0508423*	0.0791783*
-2.22003*	-0.0171356*	-0.139709*	0.0203247*	-0.0797577*	0.0604248*
-2.12*	-0.0163574*	-0.160019*	0.0258026*	-0.106323*	0.0674744*
-2.02002*	-0.0296326*	-0.157654*	0.0312653*	-0.111786*	0.0729523*
-1.91998*	0.019577*	-0.142059*	0.0562744*	-0.111008*	0.1073*
-1.82001*	-0.015564*	-0.175644*	0.0234528*	-0.166473*	0.0791993*
-1.72003*	0.00317*	-0.174088*	0.0390778*	-0.143036*	0.104172*
-1.62*	0.0359802*	-0.143631*	0.0250092*	-0.100861*	0.12992*
-1.52002*	0.0148926*	-0.140505*	-0.0171661*	-0.0906982*	0.118223*
-1.41998*	0.00864*	-0.131119*	-0.0312347*	-0.0657043*	0.16745*
-1.32001*	0.0281677*	-0.113937*	-0.0203094*	-0.0266418*	0.182307*
-1.22003*	0.0664673*	-0.113144*	0.0101776*	0.0116577*	0.204178*
-1.12*	0.110199*	-0.0709686*	0.027359*	0.0202332*	0.225276*
-1.02002*	0.151611*	-0.0842261*	0.0258026*	0.0303955*	0.237002*
-0.919983*	0.16333*	-0.131119*	0.0171967*	0.0405426*	0.240891*
-0.820007*	0.239105*	-0.0920563*	0.0484467*	0.0686646*	0.285463*
-0.720032*	0.309418*	-0.102219*	0.0664215*	0.0678864*	0.336197*
-0.619995*	0.331299*	-0.0959625*	0.125015*	0.102264*	0.358192*
-0.52002*	0.335205*	0.0353127*	0.185165*	0.0835114*	0.373737*
-0.419983*	0.151627*	0.0173187*	0.0648651*	0.0514984*	0.258087*
-0.320007*	0.328186*	0.230606*	0.367203*	0.161652*	0.209929*
-0.220032*	-0.0515137*	0.7603*	0.541428*	0.713989*	-0.36145*
-0.119995*	-1.00464*	0.478256*	0.305481*	0.171021*	-1.369*
-0.0200195*	-0.644485*	0.41269*	0.0406342*	-0.278976*	-1.24422*
0.0800171	0.117249*	-0.697525*	-1.00545*	-1.45242*	-0.557541*
0.179993	2.23834*	-0.798294*	-1.36717*	-1.6235*	0.694549*
0.279968	5.7399*	1.6306*	-0.23201*	-0.680542*	0.885422*
0.380005	8.61722*	3.32591*	1.23048*	0.653824*	0.363615*
0.47998	9.05862*	3.58673*	1.53204*	0.885864*	0.0728168*
0.580017	8.22504*	3.47121*	1.56407*	0.881958*	0.151047*
0.679993	7.30551*	3.34309*	1.46016*	0.967102*	0.327476*
0.779968	6.30553*	3.02356*	1.29221*	0.965561*	0.312775*
0.880005	5.27896*	2.72981*	1.18361*	0.980408*	0.398639*
0.97998	4.58755*	2.46022*	1.05783*	0.973358*	0.440044*
1.08002	3.95163*	2.17513*	0.929703*	0.92572*	0.467453*
1.17999	3.33209*	1.93138	0.842209	0.935089	0.500998
1.27997	2.65787*	1.69075	0.755493	0.92572	0.48465
1.38	2.0274*	1.47359	0.597672	0.89447	0.508826
1.47998	1.43677*	1.26418	0.456268	0.897583	0.53383
1.58002	0.690674*	1.15327	0.342209	0.898376	0.590118
1.67999	0.278961*	1.03374	0.229706	0.86087	0.596334
1.77997	-0.0554199*	0.934525	0.136734	0.868683	0.639328
1.88	-0.358551*	0.84935	0.0500031	0.885864	0.658848
1.97998	-0.652283*	0.822786	-0.0078	0.880402	0.682283
2.08002	-0.923401*	0.84935	-0.0671692	0.872589	0.719009
2.17999	-0.976501*	0.88295	-0.085144	0.855392	0.731521
2.27997	-0.908539*	0.961075	-0.117172	0.901489	0.766678
2.38	-0.920258*	1.06419	-0.132797	0.900711	0.787772
2.47998	-1.02808*	1.07356	-0.145309	0.938202	0.836197
2.58002	-1.03979*	1.09624	-0.157013	0.989777	0.866684
2.67999	-1.05621*	1.12825	-0.139053	1.01321	0.888543
2.77997	-0.950745*	1.16966	-0.124207	1.03275	0.881516
2.88	-0.792908*	1.25169	-0.128891	1.06009	0.897929
2.97998	-0.64682*	1.37199	-0.130463	1.08664	0.914321
3.08002	-0.400726*	1.48372	-0.11795	1.11087	0.928391
3.17999	-0.121826*	1.57903	-0.107803	1.10852	0.929927
3.27997	0.231293	1.72044	-0.150757	1.11713	0.911209
3.38	0.688324	1.88371	-0.122635	1.14603	0.915112
3.47998	1.07034	2.02589	-0.0812378	1.15695	0.922128
3.58002	1.44772	2.16731	-0.0609131	1.16791	0.919022
3.67999	1.86331	2.35793	-0.0210876	1.14914	0.908059
3.77997	2.45239	2.6064	-0.019516	1.16946	0.917465
3.88	3.07349	2.84233	0.0125122	1.20462	0.933853
3.97998	3.68677	3.08842	0.0617371	1.2179	0.947922
4.08002	4.34222	3.28764	0.114075	1.23587	0.955734
4.17999	4.95395	3.55247	0.16095	1.25696	0.967453
4.27997	5.65707	3.84779	0.221893	1.29446	0.958084
4.38	6.36334	4.14702	0.297668	1.32727	0.969009
4.47998	7.08832	4.42982	0.366425	1.35852	0.967447
4.58002	7.85788	4.73686	0.393768	1.37494	0.948715
4.67999	8.68442	5.03294	0.477356	1.41321	0.958856
4.77997	9.51178	5.35561	0.555481	1.47726	0.979172
4.88	10.3063	5.6642	0.646896	1.51712	0.990891
4.97998	11.2118	5.97435	0.707825	1.50931	0.998703
5.08002	12.1649	6.27357	0.780487	1.53976	0.989334
5.17999	13.1243	6.59154	0.881271	1.57805	0.998703
5.27997	14.0297	6.91029	0.989075	1.62415	1.00652
5.38	14.9735	7.29622	1.0844	1.66711	1.02605
5.47998	15.9203	7.66029	1.18439	1.69836	1.03151
5.58002	16.936	8.01732	1.27814	1.74368	1.03777
5.67999	17.9469	8.36653	1.39767	1.77649	1.04792
5.77997	18.9946	8.76341	1.52971	1.82571	1.04948
5.88	20.0407	9.16185	1.67267	1.88586	1.06902
5.97998	21.0758	9.52122	1.80705	1.92102	1.08229
6.08002	22.0938	9.90324	1.98283	1.97806	1.08308
6.17999	23.1047	10.3079	2.13986	2.0343	1.09089
6.27997	24.175	10.6908	2.2758	2.05618	1.08464
6.38	25.2165	11.1165	2.41486	2.08664	1.0901
6.47998	26.2368	11.5228	2.56252	2.13586	1.10964
6.58002	27.2633	11.9368	2.72736	2.15775	1.13152
6.67999	28.3118	12.3431	2.88673	2.19211	1.14168
6.77997	29.3914	12.7689	3.01877	2.22025	1.15886
6.88	30.4485	13.1986	3.14845	2.26868	1.17214
6.97998	31.6047	13.6556	3.28284	2.31635	1.20027
7.08002	32.768	14.0947	3.45158	2.37415	1.20027
7.17999	33.8852	14.5423	3.60393	2.43274	1.22526
7.27997	34.9704	14.9751	3.76018	2.45853	1.22292
7.38	36.0742	15.4439	3.92422	2.53586	1.25027
7.47998	37.143	15.8611	4.09454	2.5968	1.25888
7.58002	38.2813	16.3353	4.25237	2.63431	1.28621
7.67999	39.3329	16.7603	4.40471	2.69446	1.30104
7.77997	40.3258	17.2236	4.56877	2.74759	1.30183
7.88	41.3868	17.6595	4.74846	2.77493	1.29794
7.97998	42.4508	18.1236	4.94766	2.82101	1.32604
8.08002	43.5094	18.5728	5.1297	2.88586	1.35027
8.17999	44.5274	19.0282	5.28362	2.91556	1.34871
8.27997	45.5954	19.4923	5.4594	2.96399	1.37917
8.38	46.6313	19.9618	5.61565	3.0007	1.39169
8.47998	47.6555	20.4212	5.78596	3.06087	1.42294
8.58002	48.6797	20.9181	5.93439	3.13196	1.44167
8.67999	49.7	21.354	6.1086	3.17648	1.45339
8.77997	50.6774	21.8314	6.30392	3.23978	1.45653
8.88	51.5719	22.2759	6.44611	3.29446	1.46745
8.97998	52.5344	22.7431	6.5883	3.34445	1.47527
9.08002	53.4602	23.1798	6.74455	3.39368	1.48073
9.17999	54.3797	23.6587	6.93517	3.4679	1.49635
9.27997	55.3469	24.1392	7.09454	3.54602	1.50105
9.38	56.2711	24.5962	7.26955	3.5968	1.50887
9.47998	57.1805	25.0243	7.44768	3.64758	1.51823
9.58002	58.1321	25.483	7.63751	3.70618	1.52605
9.67999	59.0563	25.9611	7.84846	3.76009	1.53777
9.77997	59.9672	26.4244	8.0258	3.81165	1.53777
9.88	60.8735	26.9048	8.19453	3.85226	1.56666
9.97998	61.7063	27.3517	8.38518	3.89133	1.5573
10.08	62.5383	27.8033	8.59064	3.93665	1.55965
10.18	63.3641	28.2603	8.76408	4.00383	1.56511
10.28	64.1821	28.7204	8.9547	4.06085	1.57994
10.38	64.9985	29.1603	9.11798	4.0968	1.58855
10.48	65.8641	29.6454	9.27736	4.16556	1.61198
10.58	66.6766	30.09	9.44611	4.23352	1.60262
10.68	67.5125	30.5103	9.60393	4.28821	1.60808
10.78	68.3063	30.9814	9.79689	4.33743	1.60027
10.88	69.0391	31.4509	10.0039	4.40305	1.60809
10.98	69.7625	31.9064	10.2078	4.47415	1.63933
11.08	70.5086	32.3462	10.3774	4.51477	1.65105
11.18	71.2563	32.8033	10.5195	4.57336	1.65261
11.28	71.9836	33.2619	10.7117	4.62024	1.66902
11.38	72.7196	33.704	10.8914	4.6718	1.66902
11.48	73.4125	34.1525	11.0781	4.73117	1.6784
11.58	74.1172	34.5993	11.2774	4.79367	1.69011
11.68	74.8329	35.0689	11.4422	4.8515	1.70965
11.78	75.5282	35.5103	11.6	4.89914	1.72527
11.88	76.1977	35.9283	11.7656	4.96399	1.72762
11.98	76.836	36.3611	11.9531	5.00931	1.73855
12.08	77.4774	36.8095	12.1235	5.07962	1.75652
12.18	78.1078	37.2439	12.2625	5.13977	1.74715
12.28	78.7461	37.6994	12.4492	5.22101	1.76744
12.38	79.3368	38.1251	12.6117	5.28275	1.7784
12.48	79.9243	38.5509	12.7563	5.32336	1.78151
12.58	80.5453	38.983	12.9531	5.37805	1.79012
12.68	81.1157	39.3994	13.1375	5.43118	1.79402
12.78	81.6922	39.8048	13.3711	5.48978	1.79793
12.88	82.2836	40.2462	13.5531	5.55383	1.81512
12.98	82.8907	40.697	13.7422	5.61398	1.82604
13.08	83.4594	41.129	13.9219	5.67102	1.83699
13.18	84.004	41.5415	14.1141	5.70618	1.83229
13.28	84.5727	41.9322	14.3203	5.76321	1.82918
13.38	85.1586	42.3322	14.5297	5.83118	1.84636
13.48	85.7188	42.7462	14.7516	5.92023	1.869
13.58	86.2462	43.1447	14.975	5.97571	1.87996
13.68	86.7704	43.5259	15.1742	6.04602	1.88933
13.78	87.2719	43.9244	15.35	6.13118	1.90575
13.88	87.725	44.3283	15.5203	6.19055	1.92449
13.98	88.1915	44.7189	15.7203	6.26242	1.94167
14.08	88.6571	45.1212	15.9383	6.31555	1.93855
14.18	89.1367	45.5001	16.1188	6.36867	1.93932
14.28	89.5587	45.8908	16.3047	6.43274	1.95964
14.38	89.9969	46.3017	16.468	6.48978	1.96434
14.48	90.4586	46.7048	16.65	6.54211	1.97527
14.58	90.875	47.0611	16.832	6.59445	1.97838
14.68	91.3227	47.4845	17.0008	6.66165	1.98933
14.78	91.7368	47.879	17.1617	6.68274	1.99089
14.88	92.186	48.2994	17.3469	6.74759	2.01278
14.98	92.6383	48.6392	17.5235	6.82101	2.03931
15.08	93.1055	48.9142	17.6977	6.86243	2.0284
15.18	93.5766	49.2423	17.8656	6.93118	2.04558
15.28	94.1032	49.6009	18.0664	6.99289	2.04558
15.38	94.4977	49.9361	18.2516	7.04602	2.05885
15.48	94.7563	50.2548	18.4539	7.10931	2.07527
15.58	95.086	50.5626	18.6586	7.18274	2.07918
15.68	95.5094	50.9056	18.857	7.22961	2.09947
15.78	95.8751	51.2173	19.061	7.29211	2.10808
15.88	96.2438	51.5642	19.275	7.36398	2.1198
15.98	96.6094	51.9275	19.4906	7.41711	2.13933
16.08	97.0157	52.2759	19.6821	7.4679	2.1526
16.18	97.3891	52.6212	19.8617	7.55072	2.15965
16.28	97.6876	52.9517	20.0391	7.61243	2.16042
16.38	98.0071	53.2829	20.2422	7.69366	2.17058
16.48	98.3774	53.6486	20.4477	7.74368	2.18465
16.58	98.7462	54.0275	20.6196	7.7843	2.20808
16.68	99.0344	54.404	20.7984	7.85226	2.2151
16.78	99.2274	54.7619	20.9946	7.91399	2.23073
16.88	99.4633	55.1212	21.1719	7.97336	2.23152
16.98	99.6508	55.4665	21.3149	8.02649	2.24245
17.08	99.9555	55.7994	21.4711	8.09525	2.25261
17.18	100.374	56.172	21.6602	8.1554	2.26278
17.28	100.762	56.5533	21.8485	8.22025	2.27449
17.38	101.095	56.865	22.043	8.26868	2.2815
17.48	101.416	57.1158	22.2281	8.31165	2.27605
17.58	101.68	57.404	22.3891	8.38351	2.2784
17.68	101.988	57.7017	22.6102	8.46869	2.28387
17.78	102.237	57.9978	22.8063	8.54132	2.29558
17.88	102.476	58.272	22.9727	8.60539	2.29323
17.98	102.766	58.5642	23.1664	8.69211	2.31121
18.08	103.016	58.8611	23.3578	8.76086	2.33699
18.18	103.242	59.1236	23.5391	8.79602	2.32291
18.28	103.463	59.3923	23.725	8.86087	2.32057
18.38	103.73	59.672	23.9274	8.90305	2.32683
18.48	103.965	59.947	24.1211	8.98978	2.35027
18.58	104.242	60.2228	24.2977	9.05383	2.36043
18.68	104.481	60.483	24.4946	9.11868	2.36589
18.78	104.701	60.7423	24.6695	9.17493	2.37761
18.88	104.91	60.9908	24.8172	9.22806	2.36199
18.98	105.173	61.2478	25.0055	9.28195	2.37761
19.08	105.416	61.5212	25.168	9.32336	2.38933
19.18	105.66	61.7642	25.3836	9.4093	2.38778
19.28	105.882	62.0384	25.5563	9.49915	2.40651
19.38	106.094	62.2837	25.7188	9.55383	2.41278
19.48	106.348	62.5618	25.8891	9.6257	2.42058
19.58	106.559	62.8072	26.0508	9.66711	2.43385
19.68	106.78	63.0704	26.2266	9.73041	2.44091
19.78	106.988	63.322	26.3711	9.78586	2.45103
19.88	107.211	63.5806	26.5555	9.8429	2.46043
19.98	107.379	63.8361	26.7383	9.90384	2.4612
20.08	107.545	64.0853	26.9375	9.95383	2.47136
20.18	107.703	64.3244	27.1094	9.99524	2.4698
20.28	107.87	64.5509	27.3008	10.0327	2.46901
20.38	108.045	64.7798	27.4524	10.0913	2.47607
20.48	108.213	65.0447	27.6359	10.132	2.48619
20.58	108.373	65.2751	27.836	10.1843	2.48933
20.68	108.596	65.5142	28.0242	10.232	2.51278
20.78	108.757	65.74	28.2031	10.3077	2.52916
20.88	108.976	65.9626	28.3906	10.3741	2.54012
20.98	109.181	66.172	28.5664	10.4148	2.5526
21.08	109.383	66.3892	28.7461	10.4804	2.55809
21.18	109.555	66.6017	28.8813	10.5632	2.56902
21.28	109.773	66.822	29.0453	10.6359	2.55965
21.38	109.935	67.0392	29.1797	10.7062	2.57057
21.48	110.037	67.2494	29.3242	10.7515	2.57683
21.58	110.168	67.4658	29.4844	10.8312	2.5948
21.68	110.309	67.6517	29.6156	10.882	2.60964
21.78	110.473	67.8415	29.7735	10.9601	2.62526
21.88	110.599	68.0298	29.9274	11.032	2.62996
21.98	110.727	68.2462	30.0813	11.0781	2.64559
22.08	110.874	68.4494	30.2359	11.1515	2.6487
22.18	110.998	68.6556	30.3828	11.2179	2.65886
22.28	111.152	68.8322	30.5336	11.2741	2.67839
22.38	111.323	69.0275	30.6836	11.3085	2.68465
22.48	111.463	69.2009	30.8555	11.3718	2.7151
22.58	111.573	69.3751	31.0258	11.3937	2.72292
22.68	111.677	69.5603	31.1984	11.4601	2.74089
22.78	111.761	69.7345	31.3383	11.5241	2.75105
22.88	111.842	69.9298	31.4867	11.5835	2.7487
22.98	111.945	70.108	31.6453	11.6226	2.76824
23.08	112.054	70.3064	31.8039	11.6921	2.78777
23.18	112.155	70.4837	31.957	11.7546	2.80104
23.28	112.267	70.6455	32.1047	11.8203	2.80809
23.38	112.357	70.8244	32.2672	11.8624	2.82057
23.48	112.473	71.0189	32.4242	11.9249	2.82917
23.58	112.595	71.1798	32.586	11.9718	2.83855
23.68	112.698	71.3783	32.7438	12.0359	2.85808
23.78	112.841	71.5509	32.8906	12.107	2.87135
23.88	112.974	71.7056	33.0438	12.1421	2.88387
23.98	113.102	71.8767	33.2031	12.2101	2.90887
24.08	113.241	72.0447	33.3664	12.2718	2.93776
24.18	113.356	72.2103	33.5375	12.3335	2.95339
24.28	113.481	72.3759	33.6961	12.3921	2.97762
24.38	113.588	72.5353	33.8281	12.4445	2.98934
24.48	113.714	72.6962	33.9961	12.4991	3.00808
24.58	113.84	72.8462	34.143	12.5695	3.01823
24.68	113.963	72.9673	34.2758	12.6241	3.0284
24.78	114.07	73.1243	34.4367	12.6906	3.05495
24.88	114.205	73.2556	34.5742	12.714	3.06276
24.98	114.332	73.4048	34.7258	12.7531	3.07918
25.08	114.32	73.5408	34.8766	12.7929	3.07918
25.18	114.359	73.6501	35.0211	12.8499	3.08619
25.28	114.349	73.7595	35.1391	12.8921	3.10027
25.38	114.503	73.8814	35.2758	12.946	3.09871
25.48	114.717	74.004	35.4453	12.9937	3.11979
25.58	114.929	74.1345	35.5766	13.0406	3.11589
25.68	115.011	74.2658	35.7344	13.1085	3.13542
25.78	115.06	74.3978	35.8672	13.1726	3.1487
25.88	115.097	74.5408	36.0055	13.2077	3.16042
25.98	115.193	74.6783	36.1453	13.2695	3.17918
26.08	115.217	74.7712	36.2461	13.321	3.17839
26.18	115.261	74.8829	36.3539	13.3741	3.18621
26.28	115.283	74.9978	36.5016	13.421	3.20103
26.38	115.369	75.1431	36.6414	13.4937	3.21589
26.48	115.398	75.2634	36.7438	13.5031	3.20809
26.58	115.468	75.4134	36.8633	13.5577	3.23463
26.68	115.533	75.5728	36.9946	13.6023	3.2487
26.78	115.572	75.7064	37.1266	13.6109	3.24089
26.88	115.638	75.8345	37.2625	13.6695	3.25497
26.98	115.748	75.9626	37.4024	13.7312	3.28541
27.08	115.769	76.072	37.5078	13.7921	3.27214
27.18	115.862	76.2119	37.6219	13.8531	3.28621
27.28	115.98	76.3353	37.7359	13.9195	3.27995
27.38	116.003	76.4783	37.8828	13.9905	3.29713
27.48	116.08	76.5978	37.9828	14.021	3.29793
27.58	116.17	76.7165	38.1133	14.0929	3.3073
27.68	116.269	76.8611	38.2453	14.1593	3.30885
27.78	116.359	76.965	38.3672	14.2234	3.31902
27.88	116.444	77.0744	38.4758	14.3085	3.33699
27.98	116.513	77.1916	38.5938	14.3546	3.3409
28.08	116.581	77.3079	38.7149	14.4241	3.34947
28.18	116.666	77.4025	38.8125	14.4687	3.36434
28.28	116.672	77.5056	38.9336	14.5093	3.36824
28.38	116.755	77.6228	39.0641	14.5491	3.37682
28.48	116.766	77.7345	39.1664	14.6031	3.37996
28.58	116.824	77.8283	39.2625	14.6476	3.39714
28.68	116.849	77.9275	39.3906	14.6812	3.40886
28.78	116.899	78.0212	39.4922	14.7351	3.43776
28.88	116.935	78.1189	39.5742	14.7921	3.45028
28.98	116.988	78.2376	39.693	14.8601	3.47057
29.08	117.031	78.3493	39.8524	14.8999	3.47606
29.18	117.113	78.4376	40.0313	14.9601	3.48698
29.28	117.132	78.5197	40.125	15.0015	3.48933
29.38	117.187	78.5892	40.2828	15.053	3.50182
29.48	117.214	78.6986	40.4063	15.1148	3.51042
29.58	117.238	78.7642	40.4774	15.1577	3.50731
29.68	117.286	78.89	40.582	15.2116	3.51979
29.78	117.327	78.9822	40.6813	15.2609	3.52995
29.88	117.355	79.0868	40.7813	15.3234	3.52995
29.98	117.411	79.2009	40.8766	15.3741	3.54322
30.08	117.445	79.3158	40.9828	15.3952	3.5323
30.18	117.472	79.4064	41.0742	15.4117	3.53777
30.28	117.534	79.5251	41.1688	15.4468	3.5573
30.38	117.61	79.6243	41.2883	15.4968	3.5573
30.48	117.681	79.7353	41.4008	15.5499	3.56746
30.58	117.749	79.8454	41.518	15.5781	3.57527
30.68	117.844	79.9431	41.632	15.6257	3.58775
30.78	117.945	80.0267	41.7422	15.6765	3.5909
30.88	118.059	80.1259	41.8805	15.7273	3.59947
30.98	118.153	80.2181	42.0078	15.7804	3.60808
31.08	118.255	80.3142	42.1196	15.8374	3.60887
31.18	118.381	80.4251	42.2383	15.8898	3.63072
31.28	118.498	80.5267	42.3516	15.9288	3.62215
31.38	118.595	80.6267	42.4414	15.9616	3.62761
31.48	118.716	80.7025	42.5469	16.0234	3.63622
31.58	118.838	80.804	42.6328	16.0726	3.63072
31.68	118.944	80.9056	42.711	16.1124	3.62996
31.78	119.031	80.9861	42.8047	16.146	3.62761
31.88	119.151	81.097	42.8883	16.1999	3.65651
31.98	119.274	81.2103	42.957	16.2359	3.66746
32.08	119.405	81.304	43.0375	16.2726	3.66667
32.18	119.526	81.4095	43.1359	16.3093	3.66979
32.28	119.633	81.5087	43.2289	16.3702	3.66902
32.38	119.764	81.5954	43.318	16.4093	3.67839
32.48	119.893	81.6923	43.3945	16.4499	3.67761
32.58	120.027	81.8204	43.5078	16.4898	3.69872
32.68	120.145	81.9165	43.607	16.5398	3.70965
32.78	120.274	82.0134	43.6977	16.5992	3.72371
32.88	120.419	82.1111	43.7852	16.6398	3.71902
32.98	120.555	82.2142	43.8961	16.6882	3.73853
33.08	120.647	82.2861	43.9899	16.7179	3.72762
33.18	120.786	82.3923	44.0844	16.7867	3.73699
33.28	120.906	82.4814	44.1945	16.8546	3.75807
33.38	121.018	82.5658	44.2563	16.8976	3.73934
33.48	121.143	82.6634	44.3547	16.9655	3.75417
33.58	121.256	82.7728	44.457	17.0421	3.77995
33.68	121.359	82.8611	44.5336	17.1046	3.78776
33.78	121.471	82.9564	44.5938	17.1476	3.78777
33.88	121.598	83.0517	44.6828	17.1882	3.79948
33.98	121.702	83.1517	44.7578	17.2413	3.79949
34.08	121.82	83.2478	44.8555	17.2867	3.81746
34.18	121.914	83.3447	44.9352	17.3694	3.82994
34.28	122.026	83.4251	45.0258	17.4132	3.83308
34.38	122.149	83.5072	45.1149	17.4585	3.83074
34.48	122.255	83.6095	45.2031	17.5093	3.83543
34.58	122.346	83.7079	45.3039	17.5648	3.83775
34.68	122.457	83.7782	45.4047	17.6202	3.82918
34.78	122.566	83.8501	45.5039	17.6499	3.83699
34.88	122.668	83.94	45.5953	17.6999	3.84947
34.98	122.77	84.0423	45.7031	17.7281	3.86199
35.08	122.902	84.1243	45.7844	17.7702	3.8698
35.18	123.042	84.2204	45.8633	17.8257	3.89559
35.28	123.145	84.2923	45.9321	17.8663	3.8987
35.38	123.241	84.3548	46.0055	17.8898	3.90105
35.48	123.366	84.4228	46.1031	17.9382	3.92058
35.58	123.473	84.5017	46.1719	17.9781	3.93855
35.68	123.559	84.5658	46.2672	18.0109	3.9323
35.78	123.682	84.6361	46.3227	18.0382	3.94011
35.88	123.785	84.6947	46.4055	18.0882	3.96901
35.98	123.881	84.7704	46.457	18.1241	3.96981
36.08	123.977	84.8204	46.5235	18.1577	3.97917
36.18	124.053	84.8587	46.586	18.2023	3.97762
36.28	124.151	84.9251	46.6672	18.2413	3.99635
36.38	124.26	84.9861	46.7367	18.282	4.01042
36.48	124.343	85.0634	46.8063	18.3234	4.01198
36.58	124.432	85.1486	46.8852	18.3687	4.01903
36.68	124.483	85.204	46.9703	18.407	4.0237
36.78	124.571	85.2572	47.0367	18.4601	4.03151
36.88	124.641	85.3142	47.1117	18.4991	4.04012
36.98	124.73	85.3915	47.1922	18.546	4.05885
37.08	124.815	85.4642	47.2578	18.589	4.05965
37.18	124.888	85.5267	47.3258	18.614	4.06276
37.28	124.966	85.6033	47.3969	18.6835	4.07527
37.38	125.074	85.6634	47.4633	18.7273	4.07918
37.48	125.138	85.7337	47.5328	18.7804	4.07838
37.58	125.195	85.7673	47.6031	18.8195	4.08855
37.68	125.273	85.8158	47.6914	18.8679	4.10808
37.78	125.363	85.8665	47.7641	18.8999	4.11824
37.88	125.45	85.9181	47.8273	18.9406	4.12761
37.98	125.535	85.9868	47.8945	18.989	4.13072
38.08	125.602	86.0212	47.9508	19.0343	4.13387
38.18	125.659	86.0642	48.0039	19.0499	4.12135
38.28	125.712	86.1103	48.0547	19.0929	4.13152
38.38	125.782	86.1392	48.1328	19.1382	4.12841
38.48	125.85	86.1845	48.193	19.1882	4.15651
38.58	125.894	86.2376	48.2672	19.2296	4.14949
38.68	125.967	86.2689	48.3141	19.2585	4.14635
38.78	126.041	86.3142	48.3735	19.3015	4.15886
38.88	126.098	86.3548	48.4414	19.3413	4.14793
38.98	126.161	86.3884	48.5055	19.3741	4.14088
39.08	126.221	86.4353	48.5664	19.4132	4.15105
39.18	126.276	86.4853	48.6266	19.4616	4.16042
39.28	126.318	86.529	48.6758	19.4952	4.16121
39.38	126.36	86.5642	48.7328	19.5078	4.15886
39.48	126.421	86.5892	48.775	19.5499	4.15731
39.58	126.492	86.6259	48.843	19.5984	4.16432
39.68	126.552	86.6736	48.8985	19.632	4.17839
39.78	126.595	86.7306	48.9539	19.6656	4.18309
39.88	126.652	86.765	48.9859	19.6984	4.19402
39.98	126.677	86.804	49.0445	19.7273	4.20885
40.08	126.723	86.847	49.1055	19.7609	4.20964
40.18	126.751	86.8798	49.1563	19.7882	4.20809
40.28	126.785	86.9064	49.2031	19.8257	4.21199
40.38	126.806	86.9447	49.2539	19.8468	4.21902
40.48	126.845	86.9759	49.3047	19.8874	4.21745
40.58	126.876	87.0111	49.3469	19.9015	4.21745
40.68	126.913	87.0486	49.3985	19.9421	4.23229
40.78	126.959	87.0892	49.4375	19.9781	4.22997
40.88	126.96	87.09	49.4672	19.9898	4.21745
40.98	127.001	87.1337	49.5156	20.007	4.21902
41.08	127.027	87.1673	49.5656	20.0569	4.23854
41.18	127.045	87.2103	49.5961	20.0812	4.23933
41.28	127.059	87.2212	49.6367	20.0992	4.23543
41.38	127.079	87.2392	49.6813	20.1202	4.24871
41.48	127.118	87.2689	49.7281	20.1491	4.26979
41.58	127.132	87.3025	49.7719	20.171	4.27058
41.68	127.152	87.3298	49.8102	20.1945	4.26823
41.78	127.167	87.3533	49.8344	20.2163	4.27605
41.88	127.198	87.3861	49.8828	20.2585	4.27605
41.98	127.202	87.4173	49.9274	20.2804	4.28777
42.08	127.192	87.4368	49.9508	20.3195	4.28151
42.18	127.191	87.4587	49.9852	20.3452	4.30575
42.28	127.208	87.4759	50.0383	20.3874	4.31667
42.38	127.214	87.5072	50.0508	20.4093	4.32917
42.48	127.212	87.5306	50.0688	20.4304	4.31902
42.58	127.221	87.5681	50.1086	20.4734	4.3401
42.68	127.236	87.6087	50.1453	20.5132	4.35027
42.78	127.231	87.6306	50.1813	20.5249	4.3409
42.88	127.235	87.6384	50.218	20.5593	4.34792
42.98	127.261	87.6986	50.2602	20.5929	4.36979
43.08	127.273	87.7181	50.2852	20.6163	4.35808
43.18	127.311	87.7376	50.3281	20.6609	4.3698
43.28	127.333	87.7751	50.3688	20.6734	4.37761
43.38	127.37	87.7986	50.3953	20.6968	4.38622
43.48	127.427	87.8181	50.4274	20.7101	4.39715
43.58	127.446	87.8564	50.4586	20.739	4.40807
43.68	127.471	87.8689	50.4844	20.7468	4.40886
43.78	127.49	87.8884	50.5094	20.7632	4.4073
43.88	127.522	87.9111	50.5258	20.7804	4.41042
43.98	127.588	87.9368	50.5656	20.8265	4.42604
44.08	127.619	87.9587	50.5985	20.8609	4.42918
44.18	127.655	87.9704	50.6305	20.8937	4.4362
44.28	127.692	87.9704	50.6524	20.9132	4.44167
44.38	127.716	87.9876	50.6758	20.9304	4.4612
44.48	127.734	88.0009	50.707	20.9523	4.45418
44.58	127.763	88.0236	50.7344	20.982	4.45653
44.68	127.788	88.0486	50.75	21.0031	4.4612
44.78	127.809	88.0634	50.7828	20.9991	4.45729
44.88	127.848	88.0892	50.8086	21.0109	4.45809
44.98	127.904	88.1173	50.836	21.0367	4.45574
45.08	127.906	88.1267	50.8656	21.0577	4.46745
45.18	127.902	88.1478	50.8898	21.071	4.45965
45.28	127.942	88.1689	50.9164	21.0984	4.47527
45.38	127.963	88.1681	50.9453	21.1093	4.47917
45.48	127.993	88.1892	50.9766	21.1281	4.47918
45.58	128.001	88.2275	51.0094	21.1491	4.48698
45.68	127.981	88.2493	51.0274	21.1804	4.4987
45.78	127.975	88.2572	51.0578	21.1999	4.50182
45.88	127.997	88.2728	51.0805	21.2218	4.50106
45.98	127.981	88.2775	51.1055	21.246	4.50496
46.08	127.973	88.3079	51.1352	21.2624	4.50887
46.18	128.014	88.3103	51.1477	21.2741	4.50963
46.28	128.024	88.3118	51.1734	21.2843	4.51042
46.38	128.043	88.322	51.1883	21.3163	4.5284
46.48	128.078	88.3298	51.2242	21.3405	4.52995
46.58	128.097	88.3314	51.2516	21.3562	4.53151
46.68	128.089	88.3353	51.2695	21.3741	4.54168
46.78	128.111	88.3493	51.2938	21.4077	4.55809
46.88	128.127	88.3572	51.3063	21.4273	4.56511
46.98	128.153	88.3767	51.3352	21.4577	4.56822
47.08	128.157	88.39	51.3461	21.4679	4.55965
47.18	128.136	88.4079	51.357	21.4734	4.56277
47.28	128.171	88.4345	51.4024	21.4991	4.58464
47.38	128.194	88.4494	51.4164	21.5288	4.57917
47.48	128.191	88.4329	51.4289	21.5304	4.57137
47.58	128.2	88.4408	51.4586	21.5515	4.57838
47.68	128.226	88.4626	51.4774	21.5796	4.58074
47.78	128.247	88.4736	51.5055	21.5984	4.58855
47.88	128.249	88.4728	51.5274	21.6124	4.59401
47.98	128.257	88.4884	51.5563	21.6382	4.58934
48.08	128.277	88.4915	51.5781	21.6515	4.59636
48.18	128.295	88.5009	51.607	21.6804	4.5901
48.28	128.261	88.5095	51.6055	21.6788	4.57683
48.38	128.26	88.5173	51.6367	21.6906	4.58855
48.48	128.281	88.5447	51.6719	21.7085	4.58543
48.58	128.295	88.5501	51.6953	21.7179	4.5901
48.68	128.308	88.5579	51.7203	21.7484	4.59791
48.78	128.302	88.5603	51.7383	21.7531	4.5909
48.88	128.292	88.554	51.7672	21.771	4.5823
48.98	128.309	88.5618	51.7961	21.7898	4.5901
49.08	128.292	88.5423	51.8071	21.7921	4.57137
49.18	128.308	88.5392	51.8164	21.7867	4.57527
49.28	128.321	88.5423	51.8344	21.7999	4.57292
49.38	128.348	88.5501	51.8562	21.8265	4.57838
49.48	128.338	88.529	51.8602	21.8374	4.57683
49.58	128.321	88.5368	51.8805	21.8507	4.56746
49.68	128.329	88.54	51.8922	21.8601	4.57447
49.78	128.316	88.5236	51.9078	21.8624	4.55965
49.88	128.298	88.5306	51.9305	21.8804	4.56902
49.98	128.302	88.5384	51.9523	21.8913	4.57839
50.08	128.302	88.5314	51.9781	21.9015	4.58073
50.18	128.277	88.5173	51.9774	21.896	4.56591
50.28	128.295	88.5345	52.0109	21.9187	4.57603
50.38	128.282	88.5306	52.0328	21.9273	4.58855
50.48	128.282	88.5462	52.0539	21.946	4.59792
50.58	128.279	88.5775	52.0828	21.9546	4.60497
50.68	128.261	88.5822	52.0953	21.9601	4.59011
50.78	128.263	88.5907	52.1242	21.9788	4.60963
50.88	128.235	88.5853	52.1352	21.9718	4.5909
50.98	128.228	88.5822	52.143	21.9859	4.60027
51.08	128.239	88.5876	52.1617	22.0054	4.5909
51.18	128.241	88.5931	52.1734	22.0163	4.60573
51.28	128.248	88.5993	52.1938	22.0538	4.61433
51.38	128.239	88.5837	52.2047	22.0499	4.61043
51.48	128.251	88.5947	52.2164	22.071	4.61901
51.58	128.252	88.6001	52.225	22.0874	4.61668
51.68	128.241	88.5915	52.2242	22.1101	4.6159
51.78	128.233	88.5907	52.2477	22.1218	4.63698
51.88	128.234	88.5993	52.2672	22.132	4.63307
51.98	128.212	88.5907	52.2672	22.1296	4.62917
52.08	128.223	88.5759	52.2836	22.1437	4.64168
52.18	128.22	88.5603	52.3008	22.1499	4.64559
52.28	128.231	88.5423	52.3258	22.1671	4.65025
52.38	128.228	88.5236	52.3281	22.1773	4.64793
52.48	128.218	88.5212	52.332	22.1866	4.65496
52.58	128.237	88.4993	52.3625	22.196	4.66667
52.68	128.234	88.4837	52.3594	22.2023	4.6526
52.78	128.216	88.472	52.3766	22.2101	4.64949
52.88	128.227	88.4673	52.3914	22.2163	4.65339
52.98	128.2	88.4486	52.3828	22.2179	4.6487
53.08	128.206	88.4423	52.3938	22.2195	4.6487
53.18	128.204	88.4236	52.4063	22.2296	4.67058
53.28	128.192	88.415	52.4156	22.2601	4.67058
53.38	128.183	88.4118	52.4274	22.2648	4.67839
53.48	128.177	88.397	52.4321	22.2671	4.6784
53.58	128.17	88.4087	52.443	22.2898	4.69011
53.68	128.152	88.3962	52.4664	22.2921	4.69793
53.78	128.15	88.4064	52.4828	22.3007	4.70964
53.88	128.132	88.4017	52.4766	22.3093	4.70028
53.98	128.13	88.4001	52.5031	22.3327	4.69792
54.08	128.135	88.4017	52.5	22.3351	4.70964
54.18	128.109	88.4001	52.5117	22.3374	4.70574
54.28	128.118	88.3978	52.525	22.3484	4.71745
54.38	128.106	88.3728	52.5274	22.3413	4.71901
54.48	128.09	88.3689	52.5219	22.3663	4.73543
54.58	128.092	88.3603	52.5422	22.3796	4.74635
54.68	128.081	88.34	52.5469	22.3898	4.76043
54.78	128.071	88.3407	52.568	22.4054	4.76823
54.88	128.048	88.3064	52.568	22.407	4.76589
54.98	128.043	88.3142	52.5828	22.4117	4.7784
55.08	128.034	88.304	52.5953	22.4304	4.77995
55.18	128.015	88.3009	52.607	22.439	4.7737
55.28	128.003	88.2986	52.6172	22.4585	4.77684
55.38	127.993	88.3095	52.6266	22.471	4.79714
55.48	127.986	88.3064	52.643	22.4718	4.80184
55.58	127.978	88.2814	52.6445	22.4898	4.79948
55.68	127.95	88.2595	52.6445	22.4796	4.78777
55.78	127.941	88.265	52.6617	22.4968	4.79713
55.88	127.915	88.2611	52.65	22.4835	4.79949
55.98	127.92	88.2619	52.661	22.4898	4.79638
56.08	127.905	88.2587	52.6766	22.5148	4.79869
56.18	127.884	88.2533	52.6875	22.5304	4.79949
56.28	127.873	88.265	52.6969	22.528	4.82057
56.38	127.861	88.2501	52.7055	22.5367	4.80809
56.48	127.849	88.2611	52.7149	22.532	4.81511
56.58	127.841	88.2579	52.7149	22.5382	4.80885
56.68	127.833	88.2822	52.7336	22.5398	4.82058
56.78	127.843	88.3009	52.7446	22.5546	4.81981
56.88	127.834	88.3025	52.7461	22.5577	4.82683
56.98	127.817	88.2923	52.7438	22.5671	4.82682
57.08	127.806	88.2845	52.7383	22.5554	4.81276
57.18	127.804	88.2736	52.7446	22.5601	4.81745
57.28	127.763	88.2611	52.7516	22.5499	4.80574
57.38	127.759	88.2884	52.757	22.5593	4.80495
57.48	127.756	88.2767	52.75	22.5632	4.81667
57.58	127.754	88.2908	52.7563	22.5718	4.81902
57.68	127.753	88.2868	52.7594	22.5734	4.81121
57.78	127.776	88.3118	52.7594	22.5827	4.82838
57.88	127.791	88.2868	52.7852	22.5913	4.83698
57.98	127.812	88.2345	52.7656	22.5812	4.82683
58.08	127.834	88.2236	52.7906	22.6007	4.8362
58.18	127.853	88.2243	52.7711	22.6007	4.83074
58.28	127.877	88.2009	52.7821	22.6281	4.82762
58.38	127.868	88.1759	52.7813	22.6476	4.84244
58.48	127.87	88.1337	52.7727	22.6281	4.82839
58.58	127.861	88.1111	52.7891	22.6359	4.84401
58.68	127.841	88.1087	52.7883	22.6585	4.86979
58.78	127.838	88.0837	52.768	22.6617	4.8698
58.88	127.806	88.0681	52.7188	22.6437	4.83465
58.98	127.788	88.0501	52.7047	22.6773	4.87214
59.08	127.757	88.0173	52.6625	22.6687	4.84636
59.18	127.72	87.9861	52.6445	22.6554	4.89324
59.28	127.713	88.0306	52.6461	22.7359	4.87761
59.38	127.709	87.9861	52.5719	22.6687	4.80106
59.48	127.666	87.8899	52.518	22.6101	4.86431
59.58	127.624	87.6837	52.3024	22.6671	4.78542
59.68	126.596*	86.4642*	51.6024*	22.5874*	4.29515*
59.78	125.288*	86.0501*	51.7188*	22.7335*	4.26198*
59.88	123.763*	86.322*	52.3906*	23.6562*	4.57483*
59.98	121.066*	86.0733*	52.7742*	24.264*	5.15156*
60.08	119.087*	87.8204	53.9805	24.8031	5.22449
60.18	116.252*	86.665	53.7125	24.3773	5.97376
60.28	114.066*	84.1243	51.4227	22.3171	5.21434
60.38	113.71*	83.5907	50.8555	21.6687	4.76902
60.48	114.352*	83.7378	50.7523	21.4906	4.68244
60.58	114.939*	84.2111	51	21.5976	4.63387
60.68	115.548*	84.4837	51.1695	21.5421	4.64093
60.78	116.121	84.6782	51.2453	21.5288	4.59792
60.88	116.728	84.7744	51.2797	21.4648	4.49169
60.98	117.226	84.8299	51.3281	21.4148	4.39562
61.08	117.968	84.9595	51.343	21.3499	4.38072
61.18	118.311	85.2361	51.3633	21.2452	4.38154
61.28	118.723	85.4556	51.3945	21.1882	4.3448
61.38	119.128	85.6564	51.3531	21.0999	4.29089
61.48	119.686	85.8751	51.3578	21.046	4.27605
61.58	120.091	85.9673	51.2383	20.9241	4.20573
61.68	120.509	86.0048	51.1703	20.7945	4.20729
61.78	120.714	86.015	51.0414	20.6999	4.18074
61.88	120.907	86.0243	50.8914	20.614	4.15495
61.98	121.166	86.0033	50.7313	20.482	4.12761
62.08	121.351	86.0134	50.5633	20.3913	4.10963
62.18	121.621	85.9298	50.3899	20.3077	4.07762
62.28	121.902	85.8556	50.1805	20.2273	4.04167
62.38	122.163	85.7579	49.9641	20.1421	4.03309
62.48	122.366	85.6275	49.7742	20.0656	4.03622
62.58	122.603	85.5298	49.6875	19.9773	4.0284
62.68	122.795	85.4673	49.5844	19.8898	4.02135
62.78	122.943	85.3447	49.4484	19.8132	4.01668
62.88	123.1	85.2158	49.2656	19.7179	4.01042
62.98	123.186	85.1025	49.0852	19.5952	3.97762
63.08	123.311	84.954	48.9172	19.5359	3.99635
63.18	123.34	84.7298	48.7453	19.4655	3.99088
63.28	123.398	84.4548	48.4727	19.3663	3.96745
63.38	123.4	84.1931	48.2336	19.2976	3.9573
63.48	123.486	84.0134	48.0352	19.2374	3.97761
63.58	123.513	83.7908	47.8047	19.1445	3.96745
63.68	123.413	83.5368	47.5672	19.0507	3.95964
63.78	123.346	83.3142	47.3242	19.0015	3.95729
63.88	123.239	83.1189	47.0953	18.907	3.95964
63.98	123.13	82.8291	46.8789	18.8437	3.95653
64.08	123.131	82.5626	46.6367	18.7952	3.94402
64.18	123.143	82.2658	46.4094	18.7429	3.94166
64.28	123.088	81.9712	46.1602	18.6695	3.92839
64.38	123.041	81.6665	45.9859	18.6163	3.92604
64.48	122.96	81.3439	45.8	18.5593	3.91432
64.58	122.838	81.0048	45.5899	18.5093	3.89793
64.68	122.677	80.7501	45.3742	18.4398	3.90025
64.78	122.524	80.3939	45.161	18.3687	3.89793
64.88	122.346	80.1158	44.9875	18.2749	3.88698
64.98	122.114	79.7806	44.8281	18.2366	3.8776
65.08	121.886	79.4111	44.6313	18.189	3.86824
65.18	121.756	79.0556	44.4914	18.132	3.8698
65.28	121.534	78.7275	44.3438	18.0515	3.86745
65.38	121.25	78.3806	44.1813	17.9702	3.85261
65.48	121.017	78.0126	44.0235	17.9077	3.8448
65.58	120.781	77.6806	43.8688	17.8202	3.83775
65.68	120.498	77.3759	43.7477	17.7515	3.81902
65.78	120.223	77.0673	43.6109	17.6984	3.8112
65.88	120.014	76.7517	43.4805	17.6593	3.8073
65.98	119.831	76.4868	43.3492	17.632	3.81276
66.08	119.656	76.2048	43.1953	17.5905	3.80965
66.18	119.417	75.9267	43.0531	17.5484	3.79011
66.28	119.116	75.6673	42.9195	17.5343	3.79713
66.38	118.827	75.4173	42.7656	17.5007	3.79167
66.48	118.57	75.1423	42.6406	17.4757	3.7862
66.58	118.228	74.8681	42.4938	17.4179	3.77605
66.68	117.915	74.5915	42.3828	17.4163	3.77604
66.78	117.633	74.3368	42.2375	17.3913	3.76823
66.88	117.391	74.0907	42.1235	17.3765	3.77369
66.98	117.048	73.8259	41.9828	17.3468	3.75886
67.08	116.656	73.5329	41.8547	17.3273	3.7448
67.18	116.27	73.2611	41.7359	17.2859	3.75417
67.28	115.935	73.0095	41.6274	17.2984	3.75105
67.38	115.593	72.7533	41.525	17.2702	3.74635
67.48	115.288	72.4954	41.418	17.2413	3.74245
67.58	115.006	72.2626	41.3141	17.2195	3.72762
67.68	114.684	72.0173	41.2094	17.189	3.71981
67.78	114.322	71.7845	41.1266	17.1788	3.72682
67.8799	113.935	71.5243	41.0133	17.1609	3.7151
67.98	113.539	71.2892	40.8985	17.1343	3.69246
68.08	113.163	71.1087	40.8149	17.1359	3.69637
68.18	112.791	70.8962	40.7149	17.1359	3.6862
68.28	112.397	70.6837	40.6235	17.1202	3.6862
68.3799	111.969	70.4462	40.5203	17.089	3.67214
68.48	111.673	70.2689	40.4438	17.0999	3.67683
68.58	111.44	70.0501	40.3766	17.089	3.67838
68.68	111.252	69.8298	40.2797	17.0703	3.6784
68.78	111.004	69.6033	40.1984	17.0593	3.66041
68.8799	110.604	69.429	40.0883	17.0367	3.65105
68.98	110.256	69.2181	40.0274	17.028	3.6573
69.08	109.888	69.0267	39.9313	17.0046	3.65025
69.18	109.534	68.8415	39.8656	16.9913	3.64794
69.28	109.237	68.6759	39.8164	16.9898	3.65651
69.3799	108.916	68.4946	39.7492	16.9812	3.6526
69.48	108.587	68.3283	39.6797	16.9616	3.64949
69.58	108.305	68.1712	39.6266	16.9507	3.64869
69.68	107.968	68.0001	39.561	16.921	3.63387
69.78	107.676	67.8743	39.5156	16.9249	3.6276
69.8799	107.368	67.7283	39.4649	16.9171	3.60652
69.98	107.112	67.5814	39.4313	16.9093	3.60808
70.08	106.841	67.4368	39.3883	16.9109	3.61744
70.18	106.583	67.2697	39.35	16.8999	3.60808
70.28	106.345	67.1673	39.3164	16.8937	3.61824
70.3799	106.103	67.0306	39.2594	16.8702	3.62135
70.48	105.859	66.9033	39.1977	16.8679	3.61745
70.58	105.617	66.7829	39.1789	16.8718	3.63777
70.68	105.32	66.6173	39.1196	16.8632	3.63152
70.78	105.063	66.4861	39.0727	16.8484	3.62761
70.8799	104.781	66.3509	39.0109	16.839	3.6276
70.98	104.498	66.2126	38.9477	16.8101	3.60652
71.08	104.227	66.1009	38.9141	16.8093	3.61355
71.18	103.948	65.99	38.8805	16.8101	3.62605
71.28	103.64	65.8751	38.8407	16.8062	3.6276
71.3799	103.342	65.7353	38.7867	16.7913	3.60964
71.48	103.098	65.6321	38.7555	16.7976	3.61744
71.58	102.898	65.4845	38.6992	16.789	3.61669
71.68	102.741	65.3845	38.6617	16.7913	3.62135
71.78	102.53	65.2751	38.6196	16.7906	3.62916
71.8799	102.302	65.154	38.5766	16.7632	3.61043
71.98	102.081	65.0634	38.5445	16.7601	3.61589
72.08	101.863	64.9454	38.5117	16.7578	3.6198
72.18	101.666	64.8626	38.4766	16.7491	3.6198
72.28	101.488	64.7751	38.457	16.7585	3.62605
72.3799	101.229	64.6658	38.4133	16.7413	3.61354
72.48	101.027	64.5853	38.3696	16.7413	3.6198
72.58	100.833	64.5119	38.3555	16.7273	3.60809
72.68	100.63	64.4525	38.3203	16.7398	3.61979
72.78	100.434	64.3556	38.2797	16.7218	3.61043
72.8799	100.241	64.279	38.2555	16.7242	3.62526
72.98	100.049	64.2118	38.2281	16.7195	3.62762
73.08	99.886	64.1329	38.2094	16.7195	3.6276
73.18	99.6883	64.0642	38.1719	16.6929	3.6198
73.28	99.4852	63.9736	38.1383	16.6866	3.62761
73.3799	99.3211	63.9017	38.1172	16.6788	3.61589
73.48	99.1555	63.8478	38.0899	16.671	3.62761
73.58	98.9735	63.7751	38.0453	16.6609	3.61979
73.68	98.7977	63.6931	38.0109	16.6452	3.6198
73.78	98.6243	63.5993	37.9969	16.6288	3.60653
73.8799	98.4657	63.5408	37.9859	16.6374	3.62526
73.98	98.2727	63.4657	37.9586	16.632	3.61354
74.08	98.1157	63.3845	37.943	16.6296	3.60652
74.18	97.9586	63.3259	37.9203	16.6265	3.6198
74.28	97.7844	63.2345	37.8875	16.6031	3.61043
74.3799	97.6258	63.1618	37.8766	16.5952	3.62917
74.48	97.4641	63.0931	37.8672	16.5984	3.63152
74.58	97.3071	63.015	37.8508	16.5905	3.62135
74.68	97.1477	62.9337	37.8172	16.5663	3.61669
74.78	97.0282	62.8728	37.8164	16.5671	3.62761
74.8799	96.8641	62.8079	37.7922	16.5554	3.63072
74.98	96.7086	62.7423	37.7758	16.5382	3.6245
75.08	96.5813	62.6907	37.7594	16.5484	3.63542
75.18	96.4438	62.6189	37.7422	16.5241	3.63073
75.28	96.325	62.579	37.75	16.5437	3.63151
75.3799	96.1829	62.5275	37.725	16.5312	3.62841
75.48	96.0618	62.4939	37.7203	16.5187	3.64478
75.58	95.9172	62.4454	37.6977	16.5109	3.63777
75.68	95.7914	62.3978	37.6914	16.5046	3.64088
75.78	95.675	62.3767	37.6695	16.4976	3.63777
75.8799	95.5579	62.3322	37.6485	16.4874	3.62605
75.98	95.4344	62.2845	37.6094	16.4679	3.62682
76.08	95.2977	62.2782	37.5992	16.4812	3.64088
76.18	95.1672	62.2486	37.5805	16.4624	3.64013
76.28	95.0532	62.2259	37.5524	16.4515	3.62917
76.3799	95.0086	62.1986	37.5586	16.4585	3.63697
76.48	94.8922	62.1564	37.5313	16.4429	3.62215
76.58	94.786	62.1244	37.5195	16.4398	3.6159
76.68	94.661	62.0954	37.5133	16.4523	3.6276
76.78	94.5251	62.0353	37.4813	16.4413	3.6198
76.8799	94.4735	61.9626	37.4883	16.4499	3.61979
76.98	94.3899	61.9079	37.4727	16.4413	3.61668
77.08	94.2391	61.8548	37.4492	16.4421	3.60964
77.18	94.1532	61.7947	37.4485	16.4499	3.61744
77.28	94.0344	61.7243	37.4399	16.4499	3.6198
77.3799	93.9469	61.6658	37.4297	16.457	3.6198
77.48	93.868	61.6322	37.4164	16.4484	3.60807
77.58	93.7704	61.5564	37.3898	16.4515	3.60808
77.68	93.6985	61.5251	37.3891	16.4702	3.60807
77.78	93.593	61.4845	37.3656	16.4507	3.60808
77.8799	93.4977	61.4783	37.357	16.4577	3.61433
77.98	93.4063	61.4618	37.343	16.4538	3.60729
78.08	93.3126	61.4275	37.3211	16.4492	3.60887
78.18	93.2274	61.3923	37.318	16.4655	3.62526
78.28	93.1313	61.3743	37.2945	16.4538	3.60963
78.3799	93.0508	61.3673	37.2797	16.4585	3.60887
78.48	92.9618	61.3337	37.268	16.4601	3.61745
78.58	92.8836	61.3079	37.2711	16.4679	3.62916
78.68	92.7985	61.2736	37.2563	16.4796	3.62996
78.78	92.7	61.2634	37.2477	16.4742	3.62605
78.8799	92.5907	61.2142	37.2305	16.471	3.61901
78.98	92.493	61.1736	37.232	16.4781	3.63777
79.08	92.3829	61.1056	37.2289	16.4796	3.62996
79.18	92.2883	61.0915	37.1992	16.4859	3.61589
79.28	92.1992	61.0478	37.1891	16.4905	3.62682
79.3799	92.0993	61.0158	37.1836	16.4913	3.6284
79.48	92.0125	60.9822	37.168	16.4976	3.62526
79.58	91.9485	60.9408	37.1586	16.5007	3.62761
79.68	91.911	60.9134	37.1516	16.4991	3.62761
79.78	91.8524	60.8962	37.1602	16.5085	3.63698
79.8799	91.8024	60.847	37.1391	16.5093	3.63152
79.98	91.7625	60.8165	37.1305	16.5109	3.64323
80.08	91.7008	60.8064	37.1117	16.5202	3.63777
80.18	91.6204	60.779	37.0883	16.5117	3.62996
80.28	91.5789	60.7572	37.0813	16.5101	3.62681
80.3799	91.5008	60.7439	37.0571	16.5171	3.6276
80.48	91.4391	60.7252	37.0485	16.5109	3.61043
80.58	91.3758	60.7204	37.0492	16.5171	3.61434
80.68	91.3	60.6884	37.05	16.5218	3.619
80.78	91.2196	60.6736	37.0375	16.5265	3.60808
80.8799	91.1735	60.6579	37.0313	16.5226	3.61669
80.98	91.0969	60.6306	37.0258	16.5367	3.62526
81.08	91.0125	60.6072	37.0227	16.5335	3.62135
81.18	90.9461	60.5681	37.0008	16.5132	3.61199
81.28	90.9172	60.5525	36.9859	16.5171	3.61434
81.3799	90.8625	60.5329	36.9781	16.528	3.61589
81.48	90.7938	60.5087	36.961	16.532	3.60183
81.58	90.7336	60.5001	36.9625	16.5343	3.60963
81.68	90.6829	60.4783	36.9383	16.5288	3.60262
81.78	90.6438	60.4743	36.9313	16.5398	3.61824
81.8799	90.6032	60.4533	36.9188	16.539	3.61589
81.98	90.5258	60.4267	36.8961	16.5296	3.60808
82.08	90.4641	60.4064	36.8883	16.5171	3.59636
82.18	90.4157	60.3767	36.875	16.5124	3.59401
82.28	90.3539	60.3743	36.8867	16.5171	3.58855
82.3799	90.2922	60.3533	36.8688	16.5085	3.58309
82.48	90.2649	60.3392	36.8696	16.5124	3.59791
82.58	90.2243	60.3072	36.8516	16.4999	3.58854
82.68	90.1571	60.2611	36.8227	16.4734	3.57138
82.78	90.1008	60.2658	36.8375	16.4859	3.57683
82.8799	90.0282	60.2509	36.8414	16.4944	3.58385
82.98	89.9641	60.2478	36.8414	16.482	3.5909
83.08	89.904	60.2283	36.8289	16.4913	3.57918
83.18	89.8719	60.215	36.8086	16.4718	3.5862
83.28	89.8024	60.197	36.8008	16.457	3.57918
83.3799	89.7563	60.1892	36.793	16.4538	3.57683
83.48	89.7024	60.1751	36.7984	16.446	3.57683
83.58	89.6125	60.1658	36.7875	16.4406	3.57449
83.68	89.5422	60.1447	36.7789	16.4499	3.58073
83.78	89.5016	60.1267	36.7758	16.4374	3.56746
83.8799	89.4407	60.0931	36.7672	16.4171	3.57137
83.98	89.3875	60.0955	36.768	16.4171	3.56512
84.08	89.3329	60.0744	36.7711	16.4304	3.57838
84.18	89.2907	60.029	36.7695	16.4195	3.56902
84.28	89.225	60.0087	36.7516	16.4109	3.56823
84.3799	89.1946	59.9861	36.7485	16.4015	3.57917
84.48	89.1149	59.9478	36.7422	16.4015	3.57137
84.58	89.0657	59.9329	36.7399	16.3898	3.57683
84.68	89.0204	59.9056	36.7289	16.3781	3.57448
84.78	88.9993	59.8868	36.7399	16.3882	3.58855
84.8799	88.9461	59.8665	36.7305	16.3702	3.587
84.98	88.9274	59.8439	36.725	16.3663	3.59402
85.08	88.9032	59.8275	36.7399	16.3679	3.60808
85.18	88.8821	59.7947	36.7227	16.3624	3.60652
85.28	88.8391	59.7845	36.7344	16.3531	3.61589
85.3799	88.7649	59.7501	36.7242	16.3523	3.60964
85.48	88.7102	59.7298	36.7305	16.3429	3.62917
85.58	88.7118	59.7072	36.7149	16.3312	3.62996
85.68	88.6961	59.7064	36.7188	16.3195	3.6276
85.78	88.6711	59.6837	36.6977	16.3171	3.63699
85.8799	88.6344	59.6673	36.7008	16.3234	3.63933
85.98	88.5985	59.6423	36.7055	16.3116	3.65339
86.08	88.5407	59.6267	36.6781	16.3023	3.64559
86.18	88.4993	59.6134	36.6774	16.3062	3.64713
86.28	88.4539	59.6048	36.6695	16.3077	3.65651
86.3799	88.3954	59.5798	36.6524	16.2913	3.64088
86.48	88.3625	59.5579	36.6563	16.2843	3.63933
86.58	88.3407	59.5447	36.6617	16.2843	3.64558
86.68	88.2844	59.5158	36.6469	16.2726	3.63933
86.78	88.2336	59.4954	36.6406	16.2788	3.6487
86.8799	88.1633	59.4728	36.6289	16.2765	3.63777
86.98	88.111	59.4353	36.6156	16.2687	3.64169
87.08	88.075	59.4251	36.6266	16.2749	3.64714
87.18	88.0266	59.4118	36.6305	16.2687	3.64479
87.28	87.9993	59.4103	36.6235	16.2859	3.65261
87.3799	87.9915	59.3939	36.6383	16.2882	3.66667
87.48	87.9539	59.3744	36.6211	16.2882	3.65887
87.58	87.9329	59.3673	36.6289	16.3015	3.67683
87.68	87.8649	59.3415	36.6133	16.2921	3.67839
87.78	87.8211	59.3236	36.6156	16.2999	3.68385
87.8799	87.7532	59.2931	36.607	16.2999	3.6784
87.98	87.7415	59.2861	36.6203	16.3132	3.69401
88.08	87.7063	59.2681	36.6024	16.2945	3.68855
88.18	87.6633	59.2361	36.5992	16.2804	3.66667
88.28	87.6321	59.2142	36.5883	16.2804	3.67604
88.3799	87.5649	59.2001	36.5719	16.282	3.67214
88.48	87.5133	59.1876	36.5797	16.2906	3.67683
88.58	87.4852	59.1673	36.5625	16.2804	3.67839
88.68	87.4524	59.1462	36.543	16.2726	3.67604
88.78	87.4407	59.1447	36.5453	16.2804	3.6862
88.8799	87.4188	59.1243	36.5274	16.278	3.67839
88.98	87.404	59.1134	36.5313	16.2827	3.687
89.08	87.3532	59.0876	36.5195	16.2671	3.68621
89.18	87.2969	59.0712	36.5117	16.2741	3.70103
89.28	87.2438	59.0455	36.5	16.2687	3.68855
89.3799	87.1829	59.0345	36.4899	16.2687	3.68777
89.48	87.1321	59.0275	36.4985	16.2726	3.70182
89.58	87.075	59.0009	36.4859	16.2531	3.69011
89.68	87.0133	58.9845	36.4727	16.2491	3.68074
89.78	86.9469	58.9704	36.4578	16.2578	3.6901
89.8799	86.8758	58.9392	36.4523	16.2523	3.67213
89.98	86.8508	58.929	36.4336	16.2413	3.67058
90.08	86.8196	58.9048	36.4071	16.2202	3.66746
90.18	86.7743	58.8665	36.3898	16.2015	3.6487
90.28	86.7235	58.8353	36.3594	16.2023	3.65651
90.3799	86.693	58.8189	36.3485	16.1992	3.64949
90.48	86.6633	58.7962	36.3375	16.1788	3.63933
90.58	86.6414	58.7736	36.3203	16.1593	3.64558
90.68	86.5954	58.7454	36.3102	16.1687	3.63542
90.78	86.5453	58.7275	36.3008	16.1593	3.63854
90.8799	86.4938	58.7095	36.293	16.1593	3.62995
90.98	86.4368	58.6751	36.2633	16.1491	3.62135
91.08	86.3852	58.6384	36.2485	16.1437	3.6198
91.18	86.3282	58.6111	36.2539	16.1265	3.6237
91.28	86.304	58.5861	36.2344	16.1187	3.61824
91.3799	86.2727	58.5775	36.2211	16.1101	3.6198
91.48	86.2391	58.5626	36.2164	16.1101	3.61589
91.58	86.1961	58.554	36.211	16.0929	3.61745
91.68	86.1633	58.5329	36.2008	16.0796	3.62605
91.78	86.1422	58.5158	36.2078	16.0796	3.63777
91.8799	86.1008	58.4837	36.1875	16.0773	3.63308
91.98	86.0813	58.4665	36.2008	16.0788	3.64559
92.08	86.0774	58.4533	36.1938	16.1124	3.65496
92.18	86.0516	58.4446	36.1992	16.1202	3.66431
92.28	86.0133	58.4337	36.1891	16.1007	3.66667
92.3799	85.9477	58.4072	36.1719	16.1101	3.66668
92.48	85.9001	58.3978	36.1563	16.1085	3.66667
92.58	85.843	58.3658	36.1367	16.1202	3.66668
92.68	85.8313	58.3454	36.1469	16.1265	3.67838
92.78	85.7743	58.3415	36.1461	16.1359	3.67604
92.8799	85.7063	58.3173	36.1227	16.1218	3.67839
92.98	85.6672	58.2994	36.1133	16.1226	3.67293
93.08	85.6321	58.2962	36.1016	16.1179	3.68776
93.18	85.554	58.2673	36.0899	16.1202	3.67839
93.28	85.5047	58.2571	36.0938	16.1296	3.67838
93.3799	85.4602	58.2228	36.0742	16.1093	3.66902
93.48	85.4157	58.2064	36.0688	16.1085	3.65886
93.58	85.4016	58.1954	36.068	16.1351	3.66667
93.68	85.3469	58.1876	36.0531	16.1249	3.66902
93.78	85.2805	58.1814	36.0453	16.1202	3.67604
93.8799	85.2391	58.1572	36.0328	16.1234	3.66042
93.98	85.1844	58.1462	36.0367	16.1265	3.66667
94.08	85.1438	58.1251	36.0313	16.1202	3.65885
94.18	85.0743	58.1033	36.0164	16.1085	3.65575
94.28	85.0516	58.1017	36.0172	16.1148	3.65495
94.3799	84.9954	58.0868	36.0016	16.1218	3.65807
94.48	84.9719	58.0892	36.0039	16.1296	3.66277
94.58	84.9461	58.0783	36.0016	16.1124	3.6573
94.68	84.9055	58.047	35.9891	16.1093	3.66667
94.78	84.8532	58.0345	35.9805	16.1085	3.66668
94.8799	84.8563	58.047	35.9899	16.1085	3.67058
94.98	84.8336	58.0462	35.9805	16.1062	3.67604
95.08	84.8071	58.0173	35.9547	16.0945	3.6784
95.18	84.7766	58.0189	35.9594	16.1085	3.6901
95.28	84.7438	57.9993	35.9508	16.1007	3.6784
95.3799	84.7258	57.9869	35.9438	16.1031	3.69792
95.48	84.6899	57.9618	35.9156	16.0945	3.69792
95.58	84.6461	57.9259	35.8891	16.0905	3.69948
95.68	84.6008	57.9079	35.8883	16.0874	3.70964
95.78	84.5657	57.8884	35.8813	16.0913	3.71825
95.8799	84.5227	57.8751	35.8609	16.089	3.71745
95.98	84.4899	57.8572	35.8539	16.0929	3.72918
96.08	84.4539	57.8322	35.8578	16.089	3.72526
96.18	84.4055	57.8079	35.8414	16.0827	3.72838
96.28	84.3704	57.7767	35.8297	16.0874	3.73543
96.3799	84.3274	57.7595	35.8149	16.0992	3.73933
96.48	84.2704	57.7283	35.7945	16.0765	3.73229
96.58	84.2321	57.697	35.7875	16.1062	3.74088
96.68	84.1946	57.6658	35.7602	16.0835	3.73778
96.78	84.1501	57.6447	35.7477	16.0968	3.72527
96.8799	84.1274	57.6103	35.7359	16.0968	3.73072
96.98	84.0891	57.5767	35.7196	16.0718	3.71199
97.08	84.0329	57.5462	35.7086	16.0851	3.71901
97.18	84.018	57.5251	35.7047	16.0765	3.72291
97.28	83.9766	57.4978	35.6938	16.0703	3.71199
97.3799	83.9461	57.4759	35.6781	16.0499	3.70963
97.48	83.904	57.4478	35.6508	16.0406	3.70027
97.58	83.8688	57.4431	35.6539	16.0554	3.69401
97.68	83.8344	57.4267	35.6305	16.0632	3.67995
97.78	83.7961	57.4025	35.6305	16.0757	3.68464
97.8799	83.7516	57.3767	35.6	16.0601	3.67683
97.98	83.7141	57.365	35.5961	16.0554	3.66277
98.08	83.6844	57.3517	35.5899	16.0851	3.67448
98.18	83.654	57.3431	35.5875	16.0984	3.67604
98.28	83.6157	57.329	35.5641	16.1062	3.67213
98.3799	83.5782	57.3111	35.5633	16.1015	3.67293
98.48	83.5516	57.2868	35.5469	16.1179	3.66667
98.58	83.5243	57.2829	35.5484	16.0992	3.67293
98.68	83.5188	57.2611	35.5367	16.0945	3.67213
98.78	83.4954	57.2376	35.5297	16.0866	3.67994
98.8799	83.4485	57.2173	35.5024	16.082	3.66121
98.98	83.4118	57.2142	35.4977	16.0984	3.67603
99.08	83.3625	57.1759	35.4852	16.0796	3.67527
99.18	83.3118	57.1462	35.4797	16.0632	3.66042
99.28	83.2758	57.1478	35.4805	16.0929	3.65885
99.3799	83.2266	57.1212	35.461	16.0898	3.65885
99.48	83.1664	57.0814	35.4531	16.0827	3.64714
99.58	83.1344	57.0837	35.4492	16.089	3.64714
99.68	83.1024	57.0564	35.4469	16.089	3.63542
99.78	83.043	57.0369	35.4321	16.0773	3.61824
99.8799	82.993	57.0119	35.4164	16.0773	3.60418
99.98	82.9735	56.9915	35.4133	16.0749	3.61118
100.08	82.9266	56.9642	35.3906	16.0499	3.58854
100.18	82.8633	56.9361	35.3617	16.0327	3.57918
100.28	82.8211	56.904	35.3539	16.0187	3.5573
100.38	82.7961	56.8993	35.3625	16.0226	3.56901
100.48	82.7547	56.8806	35.3531	16.0109	3.56902
100.58	82.7165	56.865	35.35	15.9913	3.56667
100.68	82.6766	56.8376	35.332	15.9796	3.5612
100.78	82.6477	56.8181	35.3203	15.9624	3.55183
100.88	82.6149	56.797	35.3071	15.9601	3.53777
100.98	82.5868	56.7673	35.3102	15.9484	3.53777
101.08	82.5657	56.7571	35.293	15.9406	3.54167
101.18	82.5352	56.7291	35.2821	15.9312	3.52059
101.28	82.5008	56.7142	35.2867	15.9304	3.51823
101.38	82.4704	56.6837	35.2695	15.9273	3.50651
101.48	82.4164	56.6572	35.2594	15.9319	3.50026
101.58	82.3875	56.6072	35.25	15.9234	3.50496
101.68	82.3555	56.5978	35.2328	15.921	3.49715
101.78	82.3274	56.5759	35.2281	15.9171	3.50416
101.88	82.2875	56.5478	35.2188	15.8913	3.48855
101.98	82.2493	56.5275	35.211	15.8882	3.4987
102.08	82.2149	56.5095	35.2031	15.8726	3.48152
102.18	82.1727	56.49	35.1914	15.8585	3.47917
102.28	82.1501	56.4728	35.186	15.8546	3.48463
102.38	82.1039	56.4462	35.1695	15.8405	3.47292
102.48	82.0852	56.4259	35.1695	15.8405	3.48308
102.58	82.0555	56.4079	35.1641	15.8405	3.47761
102.68	82.0079	56.3767	35.1352	15.8046	3.46981
102.78	81.9813	56.365	35.1211	15.8171	3.46746
102.88	81.9539	56.3603	35.1094	15.8054	3.47291
102.98	81.9172	56.3361	35.0992	15.7921	3.45963
103.08	81.8844	56.3181	35.0844	15.7812	3.45965
103.18	81.8469	56.3087	35.0688	15.7804	3.47135
103.28	81.8055	56.304	35.068	15.7898	3.46745
103.38	81.7751	56.2868	35.0508	15.7867	3.47371
103.48	81.7258	56.2736	35.0406	15.7687	3.48464
103.58	81.6868	56.2579	35.0258	15.771	3.48152
103.68	81.636	56.2454	35.0063	15.7585	3.47917
103.78	81.5836	56.2165	34.9899	15.7609	3.47918
103.88	81.5516	56.2111	34.9805	15.7554	3.48698
103.98	81.4891	56.1962	34.961	15.7507	3.47526
104.08	81.4524	56.1868	34.9469	15.7468	3.47682
104.18	81.3977	56.1837	34.9297	15.7491	3.47917
104.28	81.343	56.1658	34.9102	15.7507	3.47917
104.38	81.2766	56.1556	34.8969	15.7671	3.47918
104.48	81.2415	56.1384	34.9	15.7726	3.49089
104.58	81.1868	56.1173	34.8906	15.7687	3.49089
104.68	81.1649	56.1087	34.8711	15.7663	3.4987
104.78	81.1165	56.0876	34.8805	15.7671	3.50652
104.88	81.0836	56.0626	34.8696	15.757	3.4987
104.98	81.0438	56.0564	34.8477	15.7491	3.50652
105.08	81.0329	56.0368	34.8516	15.7507	3.51042
105.18	81.0047	56.0056	34.8492	15.7476	3.51042
105.28	80.9852	55.9861	34.8399	15.7585	3.51824
105.38	80.9743	55.9759	34.8383	15.7609	3.51823
105.48	80.9368	55.9587	34.8297	15.7593	3.51823
105.58	80.9071	55.9486	34.8203	15.7468	3.51824
105.68	80.8961	55.9376	34.8188	15.7624	3.5315
105.78	80.8547	55.9298	34.8086	15.7578	3.5323
105.88	80.8102	55.8962	34.8071	15.7491	3.53622
105.98	80.7938	55.8861	34.8086	15.7585	3.53777
106.08	80.7454	55.8673	34.7984	15.7593	3.53777
106.18	80.7118	55.8454	34.7969	15.757	3.53776
106.28	80.6735	55.8353	34.7891	15.7585	3.53777
106.38	80.6375	55.8119	34.7828	15.7546	3.53152
106.48	80.6071	55.7931	34.7852	15.7617	3.54402
106.58	80.5649	55.7611	34.7813	15.7601	3.5487
106.68	80.5329	55.74	34.7695	15.7609	3.54948
106.78	80.4969	55.7072	34.7617	15.7531	3.55575
106.88	80.4563	55.6892	34.7633	15.7593	3.5612
106.98	80.4094	55.6501	34.7524	15.7702	3.5612
107.08	80.3665	55.6267	34.7524	15.7632	3.55965
107.18	80.3336	55.6017	34.7383	15.7585	3.56667
107.28	80.3368	55.5876	34.7399	15.7609	3.56902
107.38	80.3	55.5658	34.7227	15.7531	3.56902
107.48	80.2516	55.5462	34.725	15.7554	3.56902
107.58	80.1946	55.5173	34.707	15.7491	3.56355
107.68	80.1414	55.4845	34.7086	15.7491	3.57448
107.78	80.1149	55.4587	34.7031	15.7491	3.58855
107.88	80.0633	55.4079	34.6977	15.7507	3.58855
107.98	80.0211	55.3939	34.6875	15.7491	3.58855
108.08	80.0008	55.3454	34.6852	15.7296	3.58309
108.18	79.9594	55.3236	34.675	15.7413	3.5901
108.28	79.9352	55.2908	34.6586	15.7195	3.58855
108.38	79.8954	55.2736	34.6602	15.7101	3.60574
108.48	79.8844	55.2673	34.6524	15.714	3.60808
108.58	79.8649	55.2423	34.6328	15.7031	3.61199
108.68	79.8641	55.2259	34.6211	15.6984	3.61979
108.78	79.8368	55.197	34.6016	15.6866	3.60809
108.88	79.8063	55.1814	34.6	15.6999	3.61199
108.98	79.7844	55.1837	34.5875	15.6984	3.62606
109.08	79.7727	55.1868	34.582	15.7101	3.63933
109.18	79.7235	55.1697	34.5688	15.7116	3.62761
109.28	79.6915	55.1525	34.5571	15.7007	3.62606
109.38	79.6532	55.1267	34.5563	15.6968	3.63698
109.48	79.6383	55.1228	34.5586	15.6945	3.64714
109.58	79.6157	55.1103	34.5406	15.6921	3.65261
109.68	79.593	55.0923	34.5352	15.6851	3.64558
109.78	79.5579	55.0697	34.5313	15.6726	3.65261
109.88	79.5438	55.0579	34.5195	15.6804	3.65105
109.98	79.5133	55.0525	34.5117	15.6773	3.64559
110.08	79.4969	55.0548	34.5211	15.6827	3.65886
110.18	79.4415	55.0447	34.5102	15.6695	3.6573
110.28	79.4032	55.0173	34.5063	15.6765	3.6526
110.38	79.3485	55.0087	34.482	15.6609	3.6487
110.48	79.3141	55.0158	34.4899	15.6632	3.6573
110.58	79.2953	55.0072	34.4727	15.6577	3.65886
110.68	79.2672	54.9962	34.4594	15.6593	3.66823
110.78	79.2258	54.9665	34.4399	15.6359	3.64949
110.88	79.2126	54.9548	34.4375	15.6343	3.65495
110.98	79.1922	54.9353	34.4258	15.6281	3.65339
111.08	79.1555	54.9079	34.4094	15.6116	3.63698
111.18	79.1336	54.8861	34.4024	15.6007	3.64479
111.28	79.0758	54.8478	34.3696	15.5796	3.63778
111.38	79.0555	54.8439	34.3711	15.5874	3.63932
111.48	79.0188	54.8197	34.3516	15.571	3.64244
111.58	78.9852	54.8079	34.3399	15.571	3.64323
111.68	78.9547	54.779	34.3297	15.5616	3.63777
111.78	78.9172	54.7478	34.3031	15.5327	3.62996
111.88	78.8665	54.7345	34.2984	15.5398	3.6198
111.98	78.843	54.7165	34.293	15.5288	3.60808
112.08	78.8219	54.697	34.2797	15.5304	3.61744
112.18	78.7727	54.6775	34.2602	15.5187	3.59871
112.28	78.7297	54.6579	34.25	15.5171	3.59636
112.38	78.7172	54.6322	34.2438	15.5218	3.60026
112.48	78.6852	54.6095	34.2438	15.5343	3.58855
112.58	78.6375	54.5994	34.2406	15.5288	3.58855
112.68	78.6149	54.5853	34.25	15.5476	3.60572
112.78	78.5829	54.5798	34.2399	15.5421	3.60808
112.88	78.5446	54.5548	34.2305	15.5484	3.60808
112.98	78.5243	54.5462	34.2172	15.5476	3.60026
113.08	78.4758	54.5142	34.1992	15.5327	3.57918
113.18	78.443	54.5033	34.1797	15.5187	3.57683
113.28	78.4032	54.4954	34.1602	15.5163	3.58308
113.38	78.3641	54.472	34.1485	15.5109	3.57838
113.48	78.3274	54.4454	34.1383	15.4991	3.56902
113.58	78.2829	54.4368	34.1328	15.4913	3.57839
113.68	78.2571	54.4103	34.1211	15.4913	3.57136
113.78	78.2157	54.3884	34.1196	15.4913	3.56902
113.88	78.1852	54.3845	34.0899	15.4913	3.56901
113.98	78.1297	54.3509	34.0852	15.4835	3.56275
114.08	78.0813	54.3103	34.0625	15.4695	3.54949
114.18	78.0485	54.3009	34.0516	15.4742	3.5612
114.28	78.036	54.2947	34.0313	15.4702	3.5612
114.38	78.0055	54.279	34.0289	15.4718	3.55574
114.48	77.9789	54.2509	34.0172	15.4632	3.55104
114.58	77.929	54.2501	33.9961	15.4523	3.54167
114.68	77.8751	54.2111	33.975	15.4351	3.53231
114.78	77.8368	54.2103	33.9594	15.4421	3.52996
114.88	77.7938	54.197	33.9492	15.4468	3.52604
114.98	77.7657	54.1603	33.9375	15.4312	3.51667
115.08	77.7172	54.1384	33.9234	15.4202	3.50807
115.18	77.6852	54.0994	33.9024	15.4195	3.4909
115.28	77.6532	54.0876	33.8906	15.4093	3.49635
115.38	77.6251	54.0665	33.8789	15.4093	3.48933
115.48	77.5907	54.0447	33.8774	15.3976	3.47917
115.58	77.5633	54.0282	33.8531	15.3913	3.46745
115.68	77.536	54.0095	33.8492	15.3882	3.46745
115.78	77.5079	53.9869	33.8461	15.3804	3.46199
115.88	77.4657	53.9665	33.832	15.3702	3.4573
115.98	77.4368	53.9525	33.8266	15.3781	3.46746
116.08	77.3922	53.947	33.8203	15.3781	3.46745
116.18	77.3578	53.9275	33.8024	15.3734	3.4612
116.28	77.3141	53.9079	33.793	15.3741	3.45183
116.38	77.304	53.8962	33.7813	15.3609	3.45653
116.48	77.2532	53.865	33.7695	15.3648	3.44402
116.58	77.2415	53.8587	33.7617	15.3702	3.45573
116.68	77.2039	53.8298	33.7485	15.3679	3.45729
116.78	77.1758	53.7955	33.7289	15.3609	3.43856
116.88	77.1454	53.7868	33.7188	15.3507	3.44792
116.98	77.1024	53.7704	33.7047	15.3445	3.44167
117.08	77.0719	53.7658	33.6969	15.3484	3.44011
117.18	77.0438	53.7361	33.6914	15.3374	3.44011
117.28	77.004	53.7165	33.6703	15.3218	3.42528
117.38	76.9852	53.7087	33.6719	15.3195	3.44558
117.48	76.9539	53.6853	33.668	15.3288	3.45573
117.58	76.9188	53.658	33.6422	15.3195	3.44948
117.68	76.8961	53.6384	33.6508	15.3312	3.45182
117.78	76.8469	53.6072	33.6313	15.3101	3.45183
117.88	76.804	53.5954	33.6172	15.3077	3.44792
117.98	76.7516	53.5759	33.6172	15.296	3.44792
118.08	76.7118	53.5509	33.607	15.296	3.43621
118.18	76.6868	53.5462	33.6094	15.3077	3.44791
118.28	76.6321	53.5173	33.5899	15.3093	3.44637
118.38	76.5852	53.4876	33.5797	15.3132	3.44948
118.48	76.5461	53.4587	33.5727	15.3023	3.43855
118.58	76.5047	53.4275	33.5602	15.2999	3.43621
118.68	76.468	53.4259	33.5625	15.3101	3.44791
118.78	76.4172	53.4017	33.5445	15.3132	3.45103
118.88	76.3758	53.3689	33.5352	15.321	3.44637
118.98	76.3454	53.3587	33.5352	15.3234	3.45964
119.08	76.2961	53.34	33.5203	15.3218	3.45027
119.18	76.2571	53.3064	33.5016	15.3195	3.44557
119.28	76.2126	53.2931	33.4985	15.3077	3.44793
119.38	76.2039	53.279	33.4938	15.3195	3.44792
119.48	76.1766	53.2572	33.4789	15.3116	3.44636
119.58	76.1446	53.2267	33.4711	15.2984	3.43465
119.68	76.1141	53.2165	33.4688	15.3062	3.44557
119.78	76.0836	53.1837	33.4492	15.296	3.43621
119.88	76.0477	53.1595	33.443	15.3015	3.43385
119.98	76.0086	53.1267	33.4336	15.3093	3.42683
120.08	75.9485	53.097	33.4234	15.2921	3.40886
120.18	75.8946	53.0783	33.4008	15.2812	3.41667
120.28	75.8641	53.0447	33.3906	15.2687	3.39714
120.38	75.8094	53.0283	33.3789	15.2507	3.38855
120.48	75.7829	53.0353	33.3906	15.2687	3.4073
120.58	75.7336	53.0173	33.3711	15.257	3.40887
120.68	75.7157	53.0189	33.3711	15.2687	3.42994
120.78	75.6672	53.004	33.3711	15.278	3.44011
120.88	75.6282	52.9884	33.3617	15.2827	3.43074
120.98	75.6422	52.9626	33.357	15.2765	3.44246
121.08	75.6125	52.9642	33.3477	15.2882	3.44558
121.18	75.5829	52.9587	33.3399	15.2999	3.44791
121.28	75.5657	52.947	33.3258	15.2726	3.44166
121.38	75.5383	52.9197	33.3125	15.278	3.44637
121.48	75.4954	52.9056	33.293	15.282	3.44947
121.58	75.468	52.8791	33.2782	15.2656	3.44246
121.68	75.4485	52.8611	33.2813	15.2702	3.45182
121.78	75.429	52.8556	33.2695	15.2726	3.44011
121.88	75.4055	52.8431	33.2578	15.2867	3.45729
121.98	75.3743	52.8197	33.2438	15.2741	3.44793
122.08	75.368	52.8025	33.2516	15.2937	3.45182
122.18	75.3493	52.7697	33.225	15.2867	3.44246
122.28	75.3219	52.7556	33.211	15.2804	3.44792
122.38	75.3133	52.7454	33.2055	15.2804	3.44557
122.48	75.3063	52.7423	33.1953	15.2749	3.45027
122.58	75.2938	52.7345	33.186	15.2867	3.43621
122.68	75.2711	52.7243	33.1969	15.2882	3.44791
122.78	75.2196	52.6986	33.1813	15.282	3.44011
122.88	75.175	52.6986	33.1719	15.2741	3.44011
122.98	75.1649	52.6892	33.1602	15.2609	3.4573
123.08	75.1422	52.6837	33.1485	15.2687	3.45964
123.18	75.1219	52.6462	33.1383	15.2671	3.45964
123.28	75.0758	52.6173	33.1297	15.2593	3.45028
123.38	75.0461	52.6165	33.1172	15.2663	3.45964
123.48	75.0211	52.5876	33.1094	15.2609	3.4659
123.58	74.9836	52.5564	33.0977	15.2491	3.45574
123.68	74.9735	52.5759	33.0992	15.2531	3.47681
123.78	74.9368	52.5486	33.082	15.2476	3.47917
123.88	74.9071	52.5173	33.0703	15.2374	3.46746
123.98	74.8665	52.5119	33.0586	15.2546	3.46745
124.08	74.8079	52.4798	33.0508	15.2429	3.46745
124.18	74.7649	52.4759	33.0391	15.2413	3.45574
124.28	74.718	52.4376	33.0195	15.2124	3.44792
124.38	74.6735	52.4158	33.0117	15.2273	3.44793
124.48	74.6555	52.4056	33.0117	15.2398	3.44792
124.58	74.6196	52.3743	32.9922	15.2234	3.45103
124.68	74.5891	52.3595	32.9805	15.2218	3.46355
124.78	74.5407	52.3205	32.9727	15.2046	3.46043
124.88	74.4993	52.3079	32.9531	15.2179	3.45964
124.98	74.461	52.2775	32.9321	15.2085	3.45808
125.08	74.4164	52.2556	32.9117	15.1999	3.44948
125.18	74.3782	52.2478	32.9117	15.2023	3.45728
125.28	74.3454	52.2376	32.9024	15.1906	3.4659
125.38	74.304	52.2072	32.8992	15.1773	3.45808
125.48	74.2649	52.1736	32.8789	15.1765	3.45573
125.58	74.2157	52.1462	32.8609	15.1788	3.43776
125.68	74.175	52.1243	32.857	15.1593	3.44557
125.78	74.1438	52.0783	32.8305	15.1382	3.43075
125.88	74.1227	52.0775	32.832	15.1374	3.42839
125.98	74.0852	52.0486	32.8188	15.132	3.41667
126.08	74.0571	52.0111	32.8024	15.114	3.4026
126.18	74.0094	51.9869	32.7836	15.0913	3.39794
126.28	73.9821	51.9353	32.7672	15.0812	3.38542
126.38	73.9383	51.9017	32.75	15.0632	3.37916
126.48	73.9071	51.8782	32.7422	15.0538	3.37916
126.58	73.8555	51.8384	32.7133	15.039	3.36043
126.68	73.8133	51.8275	32.7008	15.028	3.35808
126.78	73.7766	51.7986	32.6977	15.0304	3.35809
126.88	73.7555	51.7853	32.6914	15.0304	3.36823
126.98	73.7258	51.758	32.6797	15.0132	3.35808
127.08	73.6946	51.7454	32.668	15.0343	3.36589
127.18	73.6664	51.7103	32.6516	15.0202	3.35183
127.28	73.6461	51.6876	32.6524	15.0226	3.37135
127.38	73.6165	51.654	32.6297	15.0015	3.3784
127.48	73.5852	51.6267	32.6266	14.9874	3.36589
127.58	73.5524	51.597	32.6094	14.9796	3.34636
127.68	73.5399	51.5681	32.6016	14.971	3.35182
127.78	73.4969	51.5447	32.582	14.964	3.34792
127.88	73.4602	51.529	32.5797	14.9546	3.35026
127.98	73.4141	51.5056	32.561	14.9507	3.34871
128.08	73.3836	51.4923	32.5391	14.9484	3.3448
128.18	73.3352	51.4626	32.5258	14.9484	3.34401
128.28	73.3055	51.4564	32.5172	14.9538	3.35807
128.38	73.2704	51.4368	32.4938	14.946	3.35027
128.48	73.2555	51.4275	32.4867	14.9523	3.34636
128.58	73.2141	51.4236	32.4781	14.9523	3.34636
128.68	73.1868	51.4103	32.4727	14.9351	3.34636
128.78	73.154	51.3978	32.4672	14.9327	3.33855
128.88	73.1375	51.3947	32.461	14.9327	3.34791
128.98	73.0797	51.3704	32.4258	14.9093	3.3409
129.08	73.0555	51.3572	32.4274	14.9015	3.33854
129.18	73.0118	51.3267	32.4008	14.8843	3.32918
129.28	72.9618	51.304	32.3852	14.882	3.32448
129.38	72.9305	51.3017	32.382	14.8757	3.33855
129.48	72.8875	51.2892	32.375	14.8531	3.33855
129.58	72.8571	51.2697	32.368	14.8413	3.33855
129.68	72.8219	51.2533	32.3477	14.839	3.3448
129.78	72.8055	51.254	32.3492	14.8601	3.35573
129.88	72.7751	51.2572	32.3399	14.8624	3.35808
129.98	72.7352	51.254	32.3297	14.8531	3.35808
130.08	72.7141	51.2532	32.3266	14.8585	3.35807
130.18	72.675	51.2298	32.3102	14.8616	3.35808
130.28	72.6571	51.2267	32.3125	14.8531	3.35808
130.38	72.6227	51.2181	32.3024	14.8429	3.35807
130.48	72.5876	51.1915	32.2899	14.8312	3.35808
130.58	72.5438	51.1751	32.2695	14.839	3.35808
130.68	72.5321	51.172	32.2774	14.8296	3.35417
130.78	72.5016	51.154	32.2578	14.8249	3.35573
130.88	72.4813	51.1439	32.2578	14.8195	3.35808
130.98	72.4329	51.1267	32.2477	14.8062	3.34636
131.08	72.4172	51.1189	32.2555	14.8226	3.34401
131.18	72.3954	51.1165	32.2422	14.8273	3.34245
131.28	72.3586	51.0993	32.2344	14.8218	3.34872
131.38	72.3376	51.0978	32.2406	14.8405	3.36199
131.48	72.3133	51.097	32.2516	14.8335	3.3698
131.58	72.2883	51.0915	32.2539	14.8171	3.37917
131.68	72.2586	51.072	32.2422	14.8195	3.38152
131.78	72.236	51.047	32.2227	14.8038	3.37996
131.88	72.2274	51.0368	32.2289	14.7843	3.37761
131.98	72.2126	51.0267	32.2188	14.7765	3.38698
132.08	72.1868	51.0197	32.2305	14.7906	3.39168
132.18	72.1594	50.9993	32.2227	14.796	3.38152
132.28	72.1305	50.9923	32.2188	14.7859	3.38387
132.38	72.1024	50.9744	32.2281	14.796	3.38543
132.48	72.0836	50.9759	32.2227	14.8351	3.40651
132.58	72.054	50.947	32.2031	14.8405	3.39713
132.68	72.0149	50.9166	32.1883	14.8281	3.38622
132.78	71.993	50.9056	32.1797	14.8366	3.39479
132.88	71.95	50.8704	32.1539	14.8249	3.39088
132.98	71.9235	50.8556	32.1406	14.8312	3.37762
133.08	71.8977	50.8493	32.1406	14.8335	3.3987
133.18	71.868	50.8392	32.1422	14.8116	3.39323
133.28	71.8391	50.8103	32.125	14.8038	3.3995
133.38	71.8141	50.8079	32.1211	14.7999	3.39713
133.48	71.7672	50.7814	32.1102	14.7906	3.38777
133.58	71.743	50.7423	32.0977	14.7765	3.37761
133.68	71.7079	50.7181	32.0836	14.7624	3.37136
133.78	71.6852	50.7009	32.0703	14.7531	3.3698
133.88	71.6633	50.6986	32.0703	14.7491	3.37761
133.98	71.6047	50.6697	32.0602	14.7491	3.38698
134.08	71.575	50.6447	32.0508	14.7507	3.37761
134.18	71.5383	50.6267	32.0313	14.7413	3.37761
134.28	71.5133	50.6165	32.0117	14.7398	3.37762
134.38	71.4875	50.5993	32.0039	14.7413	3.38152
134.48	71.4539	50.572	31.9922	14.7413	3.38152
134.58	71.4266	50.5548	31.9906	14.7296	3.38777
134.68	71.3899	50.529	31.9727	14.7234	3.37135
134.78	71.3532	50.5267	31.957	14.7281	3.38387
134.88	71.3274	50.5001	31.9492	14.732	3.37996
134.98	71.2961	50.4845	31.9414	14.7101	3.37761
135.08	71.2454	50.4548	31.9219	14.7101	3.37761
135.18	71.2204	50.4431	31.9164	14.7062	3.3737
135.28	71.1922	50.4134	31.9063	14.7062	3.37371
135.38	71.175	50.4079	31.8961	14.7101	3.38698
135.48	71.1422	50.3861	31.8789	14.7101	3.39714
135.58	71.093	50.3689	31.8805	14.7077	3.38932
135.68	71.0453	50.3376	31.8531	14.7038	3.38308
135.78	71.0071	50.3275	31.8383	14.6945	3.38778
135.88	70.9969	50.3165	31.832	14.7007	3.38932
135.98	70.9571	50.2814	31.8125	14.6929	3.37996
136.08	70.925	50.2845	31.8008	14.6866	3.38698
136.18	70.886	50.2595	31.7875	14.6788	3.37761
136.28	70.8875	50.2462	31.7813	14.6882	3.38933
136.38	70.8547	50.2337	31.7867	14.6984	3.39714
136.48	70.8157	50.2165	31.7875	14.6906	3.39714
136.58	70.7766	50.179	31.7633	14.6726	3.37917
136.68	70.7571	50.1759	31.7594	14.6749	3.38932
136.78	70.7274	50.1673	31.7438	14.6749	3.38933
136.88	70.7063	50.1673	31.7344	14.6773	3.38933
136.98	70.6735	50.1501	31.711	14.6765	3.39869
137.08	70.6344	50.1158	31.6805	14.6617	3.39168
137.18	70.6024	50.0954	31.6602	14.6593	3.38933
137.28	70.554	50.0853	31.65	14.6476	3.38387
137.38	70.5329	50.0681	31.6406	14.6687	3.39714
137.48	70.493	50.0486	31.6274	14.6695	3.39713
137.58	70.4352	50.0064	31.6	14.6617	3.37996
137.68	70.4032	50.0032	31.5953	14.6554	3.38542
137.78	70.3485	49.9798	31.5836	14.6585	3.37917
137.88	70.3141	49.965	31.5766	14.671	3.38933
137.98	70.2649	49.9564	31.5586	14.6632	3.38933
138.08	70.2352	49.9392	31.5484	14.6695	3.37762
138.18	70.2165	49.9314	31.543	14.671	3.38932
138.28	70.1868	49.9103	31.5282	14.6827	3.37996
138.38	70.1555	49.9056	31.5156	14.6788	3.38542
138.48	70.1227	49.8884	31.5172	14.6906	3.37761
138.58	70.0907	49.8751	31.5078	14.6788	3.37761
138.68	70.0594	49.8626	31.5031	14.6906	3.38307
138.78	70.0251	49.8587	31.4844	14.6827	3.3698
138.88	69.9852	49.8361	31.4906	14.6827	3.3698
138.98	69.9485	49.8181	31.4727	14.6827	3.3698
139.08	69.9266	49.7986	31.461	14.6827	3.36198
139.18	69.8946	49.7658	31.4492	14.6749	3.35808
139.28	69.8625	49.7533	31.4414	14.6593	3.35809
139.38	69.8446	49.7478	31.4414	14.6593	3.3698
139.48	69.8219	49.74	31.4477	14.6593	3.37605
139.58	69.7961	49.7267	31.4414	14.6577	3.37761
139.68	69.7563	49.6908	31.4234	14.6351	3.37136
139.78	69.7297	49.6868	31.4195	14.6241	3.35808
[truncated: 7,208 more rows]

## Sheet: 3B
Time (s)	125	62.5	31.25	15.625	7.8125
-60.08*	0.360962*	0.398804*	0.359497*	0.304871*	0.335999*		excluded data*
-59.98*	0.341431*	0.383179*	0.339966*	0.285339*	0.328191*
-59.8801*	0.337524*	0.40271*	0.339966*	0.304871*	0.335999*
-59.78*	0.337524*	0.40271*	0.339966*	0.304871*	0.328193*
-59.6801*	0.341431*	0.402703*	0.339966*	0.316589*	0.328179*
-59.58*	0.329712*	0.390991*	0.328247*	0.293152*	0.316467*
-59.48*	0.341431*	0.379272*	0.320435*	0.293152*	0.32428*
-59.3801*	0.329712*	0.379272*	0.316528*	0.281433*	0.312561*
-59.28*	0.329712*	0.37146*	0.308716*	0.273621*	0.304753*
-59.1801*	0.337524*	0.367554*	0.308716*	0.297058*	0.304749*
-59.08*	0.337524*	0.359741*	0.296997*	0.289246*	0.29303*
-58.98*	0.349243*	0.359741*	0.296997*	0.289246*	0.304749*
-58.8801*	0.341431*	0.359741*	0.289185*	0.281433*	0.304749*
-58.78*	0.349243*	0.359741*	0.30481*	0.289246*	0.304756*
-58.6801*	0.349243*	0.379272*	0.30481*	0.289246*	0.316467*
-58.58*	0.349243*	0.367554*	0.296997*	0.289246*	0.304749*
-58.48*	0.360962*	0.379272*	0.308716*	0.293152*	0.316463*
-58.3801*	0.345337*	0.351929*	0.289185*	0.285339*	0.308655*
-58.28*	0.329712*	0.348022*	0.296997*	0.269714*	0.304749*
-58.1801*	0.329712*	0.34021*	0.289185*	0.289246*	0.304749*
-58.08*	0.337524*	0.34021*	0.289185*	0.269714*	0.316467*
-57.98*	0.337524*	0.34021*	0.277466*	0.293152*	0.304756*
-57.8801*	0.341431*	0.34021*	0.289185*	0.293152*	0.316467*
-57.78*	0.333618*	0.332397*	0.269653*	0.304871*	0.30866*
-57.6801*	0.349243*	0.332402*	0.277466*	0.300964*	0.316472*
-57.58*	0.357056*	0.328491*	0.277466*	0.312683*	0.32428*
-57.48*	0.372681*	0.324585*	0.281372*	0.316589*	0.328191*
-57.3801*	0.380493*	0.34021*	0.265747*	0.312683*	0.335999*
-57.28*	0.368774*	0.34021*	0.265747*	0.300964*	0.324285*
-57.1801*	0.376587*	0.336304*	0.265747*	0.308777*	0.332092*
-57.08*	0.388306*	0.348022*	0.265747*	0.308777*	0.32428*
-56.98*	0.380493*	0.348022*	0.265747*	0.308777*	0.324287*
-56.8801*	0.380493*	0.351929*	0.277466*	0.320496*	0.347717*
-56.78*	0.392212*	0.34021*	0.277466*	0.340027*	0.347717*
-56.6801*	0.380493*	0.340217*	0.269653*	0.312683*	0.336006*
-56.58*	0.400024*	0.351929*	0.281372*	0.312683*	0.35553*
-56.48*	0.384399*	0.344116*	0.269653*	0.316589*	0.332092*
-56.3801*	0.403931*	0.344116*	0.269653*	0.293152*	0.332092*
-56.28*	0.450806*	0.367554*	0.269653*	0.320496*	0.363342*
-56.1801*	0.360962*	0.30896*	0.262634*	0.293152*	0.332092*
-56.08*	0.349243*	0.297241*	0.261047*	0.281433*	0.32428*
-55.98*	0.349243*	0.289429*	0.257935*	0.27832*	0.319587*
-55.8801*	0.360962*	0.301147*	0.257935*	0.324402*	0.316467*
-55.78*	0.382813*	0.332397*	0.250122*	0.297058*	0.328186*
-55.6801*	0.384399*	0.332397*	0.250122*	0.308777*	0.320374*
-55.58*	0.385986*	0.320679*	0.250122*	0.290833*	0.310242*
-55.48*	0.378906*	0.311279*	0.250122*	0.274353*	0.313294*
-55.3801*	0.384399*	0.314453*	0.246216*	0.28302*	0.296936*
-55.28*	0.400024*	0.306641*	0.236084*	0.271301*	0.296196*
-55.1801*	0.397705*	0.291802*	0.229065*	0.261902*	0.285211*
-55.08*	0.388306*	0.287842*	0.229004*	0.252502*	0.287537*
-54.98*	0.389893*	0.294922*	0.251709*	0.279114*	0.310234*
-54.8801*	0.386719*	0.293335*	0.250122*	0.297058*	0.303162*
-54.78*	0.380493*	0.293335*	0.250122*	0.269714*	0.289113*
-54.6801*	0.381226*	0.283934*	0.243042*	0.266541*	0.279722*
-54.58*	0.391418*	0.298767*	0.261047*	0.28064*	0.296143*
-54.48*	0.375*	0.276123*	0.246948*	0.27594*	0.293745*
-54.3801*	0.366455*	0.259766*	0.247803*	0.267395*	0.286804*
-54.28*	0.363281*	0.268311*	0.240723*	0.266541*	0.289116*
-54.1801*	0.370361*	0.291*	0.251709*	0.286926*	0.286789*
-54.08*	0.353149*	0.276123*	0.256348*	0.287659*	0.269592*
-53.98*	0.335999*	0.267578*	0.247803*	0.28302*	0.250049*
-53.8801*	0.340698*	0.269897*	0.24939*	0.300964*	0.246155*
-53.78*	0.333618*	0.267578*	0.244629*	0.300964*	0.235999*
-53.6801*	0.316406*	0.256569*	0.225098*	0.289246*	0.223488*
-53.58*	0.300049*	0.240234*	0.216553*	0.268188*	0.198547*
-53.48*	0.286743*	0.217529*	0.205566*	0.279114*	0.193763*
-53.3801*	0.255493*	0.211304*	0.189209*	0.262695*	0.164124*
-53.28*	0.234436*	0.199585*	0.164185*	0.249451*	0.132845*
-53.1801*	0.192261*	0.173809*	0.142334*	0.222839*	0.118816*
-53.08*	0.177368*	0.168335*	0.134521*	0.211121*	0.107117*
-52.98*	0.170288*	0.147217*	0.114136*	0.191589*	0.106257*
-52.8801*	0.180542*	0.150391*	0.129028*	0.203308*	0.114929*
-52.78*	0.169556*	0.123779*	0.11499*	0.191589*	0.0844126*
-52.6801*	0.181274*	0.132445*	0.118896*	0.193176*	0.0891714*
-52.58*	0.200806*	0.131592*	0.123535*	0.211121*	0.103943*
-52.48*	0.199219*	0.126953*	0.105591*	0.205627*	0.0938125*
-52.3801*	0.21875*	0.128479*	0.119629*	0.215759*	0.0961304*
-52.28*	0.210205*	0.123047*	0.118896*	0.202576*	0.101623*
-52.1801*	0.222656*	0.133179*	0.123535*	0.199402*	0.114929*
-52.08*	0.239868*	0.140991*	0.129028*	0.193909*	0.113342*
-51.98*	0.226563*	0.139404*	0.121216*	0.183777*	0.109447*
-51.8801*	0.262573*	0.173828*	0.14856*	0.194763*	0.125061*
-51.78*	0.264038*	0.180054*	0.150879*	0.219666*	0.1258*
-51.6801*	0.284424*	0.19336*	0.159546*	0.224426*	0.150086*
-51.58*	0.285156*	0.200317*	0.162598*	0.236877*	0.162537*
-51.48*	0.302368*	0.21521*	0.134521*	0.25177*	0.17745*
-51.3801*	0.345337*	0.258179*	0.156372*	0.291565*	0.210999*
-51.28*	0.375*	0.281616*	0.168823*	0.312683*	0.248474*
-51.1801*	0.384399*	0.279298*	0.169678*	0.286926*	0.253969*
-51.08*	0.397705*	0.291748*	0.168091*	0.286133*	0.242249*
-50.98*	0.421875*	0.312866*	0.17981*	0.290833*	0.220414*
-50.8801*	0.472656*	0.332397*	0.215698*	0.250183*	0.22113*
-50.78*	0.472656*	0.307373*	0.230591*	0.234558*	0.238342*
-50.6801*	0.471924*	0.302734*	0.220459*	0.24469*	0.23053*
-50.58*	0.454712*	0.291748*	0.221191*	0.232239*	0.23053*
-50.48*	0.464111*	0.310547*	0.230591*	0.225159*	0.256299*
-50.3801*	0.425049*	0.306641*	0.251709*	0.224426*	0.278992*
-50.28*	0.332031*	0.305786*	0.260254*	0.232971*	0.285219*
-50.1801*	0.311768*	0.291017*	0.268921*	0.236145*	0.285219*
-50.08*	0.297668*	0.271484*	0.279785*	0.238464*	0.289124*
-49.98*	0.265625*	0.268311*	0.285278*	0.225159*	0.281306*
-49.8801*	0.257813*	0.254272*	0.268066*	0.203308*	0.253967*
-49.78*	0.249268*	0.223022*	0.27124*	0.18927*	0.226631*
-49.6801*	0.238281*	0.223037*	0.269653*	0.172058*	0.239944*
-49.58*	0.278931*	0.273804*	0.281372*	0.190002*	0.25238*
-49.48*	0.315674*	0.401184*	0.298584*	0.204895*	0.289111*
-49.3801*	0.294556*	0.426147*	0.261841*	0.203308*	0.267273*
-49.28*	0.21875*	0.344116*	0.138428*	0.143127*	0.182056*
-49.1801*	0.212524*	0.31287*	0.125916*	0.148621*	0.178165*
-49.08*	0.228149*	0.314453*	0.181396*	0.173645*	0.23761*
-48.98*	0.278931*	0.322998*	0.175903*	0.164246*	0.225044*
-48.8801*	0.290649*	0.332397*	0.191528*	0.168152*	0.239929*
-48.78*	0.282837*	0.332397*	0.195435*	0.148621*	0.228932*
-48.6801*	0.268799*	0.319938*	0.165771*	0.150208*	0.206352*
-48.58*	0.251587*	0.285522*	0.158691*	0.127502*	0.203979*
-48.48*	0.238281*	0.238647*	0.142334*	0.115051*	0.177423*
-48.3801*	0.243042*	0.205078*	0.126709*	0.0626831*	0.155579*
-48.28*	0.201538*	0.184692*	0.0844727*	0.0579834*	0.0961471*
-48.1801*	0.212524*	0.199547*	0.0571289*	0.170471*	0.106224*
-48.08*	0.139038*	0.136292*	0.104004*	0.31189*	0.10083*
-47.98*	-0.542175*	-0.428589*	0.260254*	0.113464*	-0.450493*
-47.8801*	-0.671082*	-0.71991*	0.222778*	-1.20917*	-0.639771*
-47.78*	0.789856*	0.40271*	0.0251465*	0.00568*	0.739419*
-47.6801*	0.439819*	0.434193*	0.24231*	0.0165405*	0.28777*
-47.58*	0.459351*	0.346436*	0.14386*	0.100159*	0.277405*
-47.48*	0.203918*	0.138611*	0.0274658*	0.179871*	0.334476*
-47.3801*	0.203918*	0.346436*	0.172729*	0.309509*	0.402405*
-47.28*	0.34845*	0.409729*	0.279053*	0.372864*	0.384373*
-47.1801*	0.299255*	0.401108*	0.287659*	0.379089*	0.373459*
-47.08*	0.331299*	0.377747*	0.269653*	0.290833*	0.364929*
-46.98*	0.357056*	0.392578*	0.295471*	0.259583*	0.360981*
-46.8801*	0.323425*	0.372986*	0.30011*	0.246277*	0.325806*
-46.78*	0.292969*	0.334717*	0.282166*	0.230652*	0.287495*
-46.6801*	0.267212*	0.294886*	0.290771*	0.22522*	0.247706*
-46.58*	0.241455*	0.251953*	0.289185*	0.254089*	0.214905*
-46.48*	0.196167*	0.205078*	0.251709*	0.255676*	0.161782*
-46.3801*	0.164063*	0.168335*	0.203247*	0.207214*	0.144592*
-46.28*	0.195313*	0.182373*	0.17981*	0.207214*	0.146916*
-46.1801*	0.228149*	0.181647*	0.187622*	0.228333*	0.160223*
-46.08*	0.264038*	0.206604*	0.193848*	0.227478*	0.178162*
-45.98*	0.292236*	0.244141*	0.198608*	0.222107*	0.200866*
-45.8801*	0.284424*	0.255859*	0.197754*	0.218933*	0.210999*
-45.78*	0.310181*	0.273804*	0.204834*	0.218933*	0.246153*
-45.6801*	0.304688*	0.287839*	0.182129*	0.225159*	0.244565*
-45.58*	0.28833*	0.279297*	0.181396*	0.200989*	0.247742*
-45.48*	0.278931*	0.27063*	0.186035*	0.193909*	0.252381*
-45.3801*	0.277344*	0.269897*	0.17981*	0.201721*	0.236755*
-45.28*	0.266418*	0.24176*	0.173523*	0.18457*	0.237542*
-45.1801*	0.243774*	0.246455*	0.168091*	0.188477*	0.234431*
-45.08*	0.238281*	0.228516*	0.165771*	0.195496*	0.246155*
-44.98*	0.241455*	0.238647*	0.189941*	0.224426*	0.268012*
-44.8801*	0.260132*	0.23938*	0.219604*	0.231384*	0.277405*
-44.78*	0.250854*	0.251953*	0.21814*	0.240051*	0.28131*
-44.6801*	0.257813*	0.260498*	0.217285*	0.230652*	0.267273*
-44.58*	0.251587*	0.258179*	0.216553*	0.230652*	0.275818*
-44.48*	0.261719*	0.244141*	0.219666*	0.212708*	0.269605*
-44.3801*	0.293823*	0.262085*	0.253296*	0.234558*	0.310242*
-44.28*	0.28125*	0.271484*	0.261841*	0.25177*	0.326606*
-44.1801*	0.294556*	0.280031*	0.281372*	0.250183*	0.328187*
-44.08*	0.306274*	0.287842*	0.291504*	0.252502*	0.318787*
-43.98*	0.320313*	0.30896*	0.318848*	0.268127*	0.328185*
-43.8801*	0.321167*	0.306641*	0.329834*	0.247864*	0.323547*
-43.78*	0.308594*	0.289429*	0.324341*	0.228333*	0.307074*
-43.6801*	0.330444*	0.287838*	0.328979*	0.231384*	0.316463*
-43.58*	0.321899*	0.281616*	0.322021*	0.215027*	0.308655*
-43.48*	0.321167*	0.281616*	0.33374*	0.22052*	0.302423*
-43.3801*	0.320313*	0.269897*	0.32666*	0.200989*	0.287537*
-43.28*	0.328125*	0.281616*	0.338379*	0.209534*	0.295349*
-43.1801*	0.327393*	0.275392*	0.325928*	0.197083*	0.294618*
-43.08*	0.323486*	0.27771*	0.320435*	0.179871*	0.285217*
-42.98*	0.328125*	0.282349*	0.330566*	0.180603*	0.287536*
-42.8801*	0.321899*	0.279297*	0.318115*	0.191589*	0.276672*
-42.78*	0.311768*	0.262085*	0.293091*	0.193176*	0.275816*
-42.6801*	0.298462*	0.248041*	0.304077*	0.18927*	0.276667*
-42.58*	0.286743*	0.232422*	0.27356*	0.18219*	0.275818*
-42.48*	0.290649*	0.238647*	0.268066*	0.193176*	0.28754*
-42.3801*	0.286743*	0.23938*	0.283691*	0.205627*	0.296936*
-42.28*	0.284424*	0.240234*	0.267334*	0.177551*	0.282892*
-42.1801*	0.257813*	0.219115*	0.267334*	0.162659*	0.275817*
-42.08*	0.260132*	0.217529*	0.266479*	0.158752*	0.265686*
-41.98*	0.264893*	0.211304*	0.269653*	0.142395*	0.277405*
-41.8801*	0.273438*	0.211304*	0.269653*	0.132996*	0.265686*
-41.78*	0.270386*	0.202759*	0.255615*	0.111145*	0.257873*
-41.6801*	0.277344*	0.190186*	0.246216*	0.111877*	0.253967*
-41.58*	0.280518*	0.199585*	0.234497*	0.111145*	0.255554*
-41.48*	0.285156*	0.200317*	0.239136*	0.129822*	0.264094*
-41.3801*	0.271118*	0.202759*	0.23999*	0.132263*	0.243835*
-41.28*	0.273438*	0.191772*	0.216553*	0.111877*	0.236754*
-41.1801*	0.269531*	0.176876*	0.205566*	0.11969*	0.236752*
-41.08*	0.25708*	0.156616*	0.193848*	0.105652*	0.234436*
-40.98*	0.253174*	0.15979*	0.206421*	0.0978394*	0.239933*
-40.8801*	0.251587*	0.160522*	0.207153*	0.115051*	0.236755*
-40.78*	0.242188*	0.165161*	0.209473*	0.104065*	0.24226*
-40.6801*	0.263306*	0.183231*	0.222778*	0.125183*	0.267277*
-40.58*	0.268799*	0.197998*	0.226685*	0.140808*	0.253967*
-40.48*	0.289063*	0.211304*	0.238403*	0.154114*	0.265686*
-40.3801*	0.298462*	0.199585*	0.228271*	0.15094*	0.253967*
-40.28*	0.303955*	0.205078*	0.236816*	0.164246*	0.265691*
-40.1801*	0.306274*	0.207397*	0.218872*	0.161926*	0.273498*
-40.08*	0.299194*	0.197998*	0.205566*	0.166565*	0.264099*
-39.98*	0.300049*	0.176147*	0.189209*	0.152527*	0.246156*
-39.8801*	0.290649*	0.160522*	0.191528*	0.152527*	0.257874*
-39.78*	0.306274*	0.168335*	0.197021*	0.160339*	0.267267*
-39.6801*	0.297729*	0.158204*	0.185303*	0.140808*	0.251648*
-39.58*	0.295288*	0.147217*	0.176636*	0.15094*	0.242981*
-39.48*	0.282837*	0.144897*	0.191528*	0.144714*	0.250066*
-39.3801*	0.278931*	0.140991*	0.189209*	0.154114*	0.246155*
-39.28*	0.278931*	0.134766*	0.189941*	0.140808*	0.24616*
-39.1801*	0.280518*	0.1394*	0.197754*	0.140808*	0.238338*
-39.08*	0.269531*	0.12146*	0.191528*	0.121277*	0.247742*
-38.98*	0.271118*	0.111328*	0.173584*	0.123596*	0.236763*
-38.8801*	0.273438*	0.12146*	0.182129*	0.140808*	0.260193*
-38.78*	0.275024*	0.104248*	0.183716*	0.156433*	0.257877*
-38.6801*	0.262573*	0.109742*	0.204834*	0.150208*	0.255555*
-38.58*	0.260132*	0.112061*	0.197754*	0.139221*	0.256287*
-38.48*	0.263306*	0.0941162*	0.181396*	0.132996*	0.238341*
-38.3801*	0.249268*	0.0855713*	0.17749*	0.124451*	0.23761*
-38.28*	0.241455*	0.0808105*	0.164185*	0.131409*	0.234442*
-38.1801*	0.257813*	0.0902047*	0.166504*	0.15094*	0.244563*
-38.08*	0.239868*	0.0800781*	0.14856*	0.143982*	0.236023*
-37.98*	0.25708*	0.0878906*	0.167358*	0.15802*	0.23211*
-37.8801*	0.238281*	0.0675049*	0.157104*	0.149353*	0.22345*
-37.78*	0.233643*	0.0761719*	0.171997*	0.164246*	0.230533*
-37.6801*	0.245361*	0.0784855*	0.17981*	0.15802*	0.237604*
-37.58*	0.238281*	0.0722656*	0.168091*	0.140808*	0.225037*
-37.48*	0.238281*	0.0792236*	0.17981*	0.153259*	0.236756*
-37.3801*	0.233643*	0.09021*	0.17041*	0.164246*	0.238342*
-37.28*	0.251587*	0.0917969*	0.190796*	0.175232*	0.237602*
-37.1801*	0.235962*	0.0862989*	0.174316*	0.156433*	0.230525*
-37.08*	0.216431*	0.0784912*	0.175903*	0.15094*	0.210999*
-36.98*	0.216431*	0.0690918*	0.17749*	0.160339*	0.213314*
-36.8801*	0.200806*	0.0605469*	0.17749*	0.143982*	0.204773*
-36.78*	0.206299*	0.0566406*	0.174316*	0.143127*	0.191463*
-36.6801*	0.196899*	0.049562*	0.164185*	0.122864*	0.174257*
-36.58*	0.189819*	0.0511475*	0.166504*	0.11969*	0.178162*
-36.48*	0.192261*	0.0488281*	0.159546*	0.121277*	0.16571*
-36.3801*	0.189087*	0.0371094*	0.156372*	0.118958*	0.155579*
-36.28*	0.196899*	0.0183105*	0.156372*	0.109558*	0.136774*
-36.1801*	0.167969*	0.0183125*	0.135254*	0.0900269*	0.131289*
-36.08*	0.172729*	0.00977*	0.126709*	0.101746*	0.128967*
-35.98*	0.15625*	-0.00122*	0.115723*	0.0994263*	0.122739*
-35.8801*	0.150024*	0.00427*	0.122803*	0.104065*	0.10553*
-35.78*	0.148438*	0.000366*	0.127441*	0.111877*	0.106258*
-35.6801*	0.130493*	0.00269*	0.13916*	0.121277*	0.0993099*
-35.58*	0.134399*	0.0152588*	0.151733*	0.125183*	0.0977173*
-35.48*	0.121948*	0.000366*	0.136841*	0.112732*	0.0852594*
-35.3801*	0.117188*	0.00269*	0.131348*	0.111877*	0.0750122*
-35.28*	0.09375*	0.00586*	0.143066*	0.115784*	0.0687866*
-35.1801*	0.0930176*	0.00269*	0.142334*	0.127502*	0.060245*
-35.08*	0.0992432*	0.00818*	0.142334*	0.132263*	0.0664673*
-34.98*	0.10083*	0.0136719*	0.13916*	0.140808*	0.0680542*
-34.8801*	0.101563*	0.0198975*	0.138428*	0.123596*	0.0742798*
-34.78*	0.0992432*	0.010498*	0.14856*	0.132996*	0.0547547*
-34.6801*	0.103149*	0.0316157*	0.168823*	0.132996*	0.0671992*
-34.58*	0.0992432*	0.0292969*	0.17749*	0.130676*	0.0657349*
-34.48*	0.113281*	0.0198975*	0.17041*	0.135315*	0.0766029*
-34.3801*	0.130493*	0.0284424*	0.178223*	0.139221*	0.0883179*
-34.28*	0.116455*	0.0214844*	0.159546*	0.132263*	0.083672*
-34.1801*	0.0992432*	-0.000365*	0.14624*	0.129089*	0.0742812*
-34.08*	0.10083*	0.010498*	0.136841*	0.140808*	0.0797729*
-33.98*	0.109375*	0.0214844*	0.127441*	0.142395*	0.0742846*
-33.8801*	0.128174*	0.026123*	0.138428*	0.15094*	0.0648804*
-33.78*	0.139038*	0.0378418*	0.145386*	0.158752*	0.0859947*
-33.6801*	0.130493*	0.0339403*	0.142334*	0.152527*	0.0742846*
-33.58*	0.142212*	0.0410156*	0.158691*	0.148621*	0.0765991*
-33.48*	0.159424*	0.0566406*	0.165771*	0.150208*	0.0836806*
-33.3801*	0.152344*	0.0534668*	0.161865*	0.152527*	0.0875854*
-33.28*	0.15625*	0.05896*	0.164917*	0.158752*	0.102352*
-33.1801*	0.151611*	0.0589671*	0.160278*	0.143127*	0.101631*
-33.08*	0.161743*	0.072998*	0.162598*	0.156433*	0.117249*
-32.98*	0.152344*	0.0839844*	0.169678*	0.165833*	0.127388*
-32.8801*	0.173462*	0.0925293*	0.17981*	0.172058*	0.142273*
-32.78*	0.171143*	0.109741*	0.178223*	0.18219*	0.144598*
-32.6801*	0.181274*	0.113642*	0.17749*	0.193176*	0.144587*
-32.58*	0.171143*	0.101929*	0.161865*	0.173645*	0.138367*
-32.48*	0.191406*	0.115234*	0.17981*	0.191589*	0.156316*
-32.3801*	0.208618*	0.117554*	0.175903*	0.193909*	0.154724*
-32.28*	0.189819*	0.115967*	0.164917*	0.190002*	0.154727*
-32.1801*	0.206299*	0.113652*	0.171997*	0.183777*	0.161809*
-32.08*	0.208618*	0.12146*	0.169678*	0.183777*	0.164124*
-31.98*	0.200806*	0.109741*	0.165771*	0.181458*	0.156312*
-31.8801*	0.202393*	0.113647*	0.158691*	0.183777*	0.156311*
-31.78*	0.200806*	0.115234*	0.168091*	0.172058*	0.156316*
-31.6801*	0.196899*	0.11756*	0.168091*	0.172058*	0.156317*
-31.58*	0.199219*	0.122192*	0.168823*	0.170471*	0.154724*
-31.48*	0.203125*	0.12146*	0.173584*	0.173645*	0.156311*
-31.3801*	0.200806*	0.115234*	0.168091*	0.172058*	0.146912*
-31.28*	0.204712*	0.12146*	0.17981*	0.172058*	0.160224*
-31.1801*	0.206299*	0.135498*	0.182129*	0.183777*	0.160217*
-31.08*	0.203125*	0.134766*	0.183716*	0.178284*	0.161804*
-30.98*	0.210205*	0.138672*	0.190796*	0.181458*	0.165705*
-30.8801*	0.190674*	0.129272*	0.175903*	0.160339*	0.15863*
-30.78*	0.203125*	0.131592*	0.17981*	0.164246*	0.168035*
-30.6801*	0.208618*	0.129278*	0.175903*	0.172058*	0.177435*
-30.58*	0.218018*	0.138672*	0.185303*	0.169739*	0.185242*
-30.48*	0.203125*	0.125366*	0.168091*	0.142395*	0.175847*
-30.3801*	0.210205*	0.137085*	0.166504*	0.156433*	0.171936*
-30.28*	0.21875*	0.151123*	0.17981*	0.160339*	0.183659*
-30.1801*	0.228149*	0.155033*	0.174316*	0.154846*	0.184391*
-30.08*	0.242188*	0.154297*	0.168091*	0.148621*	0.19928*
-29.98*	0.241455*	0.148804*	0.160278*	0.140808*	0.187568*
-29.8801*	0.253906*	0.162842*	0.173584*	0.140808*	0.19928*
-29.78*	0.259399*	0.172241*	0.187622*	0.140808*	0.19696*
-29.6801*	0.253174*	0.162117*	0.175903*	0.129089*	0.195381*
-29.58*	0.259399*	0.180054*	0.182129*	0.143127*	0.207092*
-29.48*	0.253906*	0.172241*	0.191528*	0.144714*	0.195377*
-29.3801*	0.25708*	0.168335*	0.185303*	0.138489*	0.200867*
-29.28*	0.25*	0.180054*	0.189209*	0.140808*	0.183655*
-29.1801*	0.251587*	0.172246*	0.187622*	0.132996*	0.182073*
-29.08*	0.259399*	0.169922*	0.186035*	0.129089*	0.183655*
-28.98*	0.259399*	0.174561*	0.205566*	0.127502*	0.187558*
-28.8801*	0.253174*	0.172241*	0.200928*	0.103333*	0.177429*
-28.78*	0.260132*	0.190186*	0.205566*	0.111877*	0.193788*
-28.6801*	0.271118*	0.180054*	0.20166*	0.101746*	0.175842*
-28.58*	0.251587*	0.174561*	0.199341*	0.104065*	0.174255*
-28.48*	0.263306*	0.195679*	0.21106*	0.105652*	0.168035*
-28.3801*	0.263306*	0.193359*	0.21106*	0.113464*	0.16803*
-28.28*	0.264893*	0.211304*	0.222778*	0.105652*	0.168035*
-28.1801*	0.267212*	0.219122*	0.230591*	0.115051*	0.168036*
-28.08*	0.271118*	0.208984*	0.228271*	0.111145*	0.16571*
-27.98*	0.267212*	0.209717*	0.218872*	0.0978394*	0.156311*
-27.8801*	0.267212*	0.211304*	0.207153*	0.0900269*	0.144592*
-27.78*	0.271118*	0.223022*	0.218872*	0.0923462*	0.156311*
-27.6801*	0.259399*	0.211311*	0.218872*	0.101746*	0.144599*
-27.58*	0.272705*	0.211304*	0.224365*	0.0939331*	0.148499*
-27.48*	0.277344*	0.217529*	0.225098*	0.100159*	0.154727*
-27.3801*	0.271118*	0.223022*	0.218872*	0.0861206*	0.148499*
-27.28*	0.267212*	0.223022*	0.218872*	0.0939331*	0.148499*
-27.1801*	0.259399*	0.224615*	0.218872*	0.0939331*	0.148504*
-27.08*	0.268799*	0.228516*	0.216553*	0.0932007*	0.146179*
-26.98*	0.257813*	0.226929*	0.207153*	0.0900269*	0.136787*
-26.8801*	0.268799*	0.233154*	0.207153*	0.0900269*	0.13678*
-26.78*	0.267212*	0.250366*	0.207153*	0.0978394*	0.144599*
-26.6801*	0.269531*	0.250366*	0.218872*	0.101746*	0.146179*
-26.58*	0.271118*	0.242554*	0.207153*	0.0900269*	0.125061*
-26.48*	0.271118*	0.242554*	0.21106*	0.0939331*	0.136784*
-26.3801*	0.269531*	0.248779*	0.205566*	0.0884399*	0.133606*
-26.28*	0.271118*	0.250366*	0.207153*	0.0822144*	0.148506*
-26.1801*	0.282837*	0.26209*	0.218872*	0.0939331*	0.148503*
-26.08*	0.28125*	0.262085*	0.221191*	0.0822144*	0.148499*
-25.98*	0.294556*	0.273804*	0.230591*	0.0939331*	0.160224*
-25.8801*	0.306274*	0.273804*	0.234497*	0.0962524*	0.160217*
-25.78*	0.303955*	0.273804*	0.230591*	0.113464*	0.160224*
-25.6801*	0.321899*	0.285527*	0.24231*	0.117371*	0.160222*
-25.58*	0.320313*	0.293335*	0.24231*	0.122864*	0.16803*
-25.48*	0.314087*	0.293335*	0.230591*	0.101746*	0.156318*
-25.3801*	0.314087*	0.293335*	0.228271*	0.105652*	0.157898*
-25.28*	0.303955*	0.291016*	0.21106*	0.0916138*	0.146173*
-25.1801*	0.282837*	0.273808*	0.20874*	0.0822144*	0.125066*
-25.08*	0.280518*	0.279297*	0.197754*	0.0783081*	0.132874*
-24.98*	0.271118*	0.269897*	0.21106*	0.0900269*	0.136781*
-24.8801*	0.261719*	0.27063*	0.21106*	0.0829468*	0.139099*
-24.78*	0.268799*	0.273804*	0.199341*	0.0861206*	0.136785*
-24.6801*	0.259399*	0.273811*	0.209473*	0.0822144*	0.144599*
-24.58*	0.271118*	0.285522*	0.228271*	0.0939331*	0.148499*
-24.48*	0.257813*	0.273804*	0.199341*	0.0861206*	0.135193*
-24.3801*	0.251587*	0.273804*	0.199341*	0.0744019*	0.121155*
-24.28*	0.255493*	0.273804*	0.203247*	0.0783081*	0.12116*
-24.1801*	0.251587*	0.273804*	0.199341*	0.0861206*	0.128967*
-24.08*	0.251587*	0.271484*	0.199341*	0.0744019*	0.117249*
-23.98*	0.253174*	0.272217*	0.191528*	0.0861206*	0.126653*
-23.8801*	0.239868*	0.262085*	0.199341*	0.0916138*	0.117249*
-23.78*	0.239868*	0.262085*	0.187622*	0.0822144*	0.117257*
-23.6801*	0.239868*	0.275394*	0.191528*	0.09552*	0.118839*
-23.58*	0.232056*	0.271484*	0.189209*	0.0900269*	0.115662*
-23.48*	0.234375*	0.264404*	0.17041*	0.0829468*	0.111766*
-23.3801*	0.249268*	0.279297*	0.17981*	0.0916138*	0.128967*
-23.28*	0.239868*	0.280029*	0.191528*	0.0939331*	0.128967*
-23.1801*	0.239868*	0.262085*	0.17981*	0.0822144*	0.128967*
-23.08*	0.232056*	0.262085*	0.169678*	0.0744019*	0.121155*
-22.98*	0.239868*	0.259766*	0.154785*	0.0822144*	0.128974*
-22.8801*	0.251587*	0.260498*	0.160278*	0.0939331*	0.126648*
-22.78*	0.239868*	0.242554*	0.160278*	0.0822144*	0.119575*
-22.6801*	0.25*	0.254277*	0.152466*	0.0939331*	0.140691*
-22.58*	0.243774*	0.259766*	0.160278*	0.101746*	0.140686*
-22.48*	0.241455*	0.242554*	0.14856*	0.0939331*	0.140693*
-22.3801*	0.232056*	0.240967*	0.160278*	0.0939331*	0.140686*
-22.28*	0.232056*	0.234741*	0.152466*	0.0916138*	0.142273*
-22.1801*	0.224243*	0.220708*	0.140747*	0.0626831*	0.136785*
-22.08*	0.220337*	0.219116*	0.140747*	0.0704956*	0.144592*
-21.98*	0.220337*	0.211304*	0.129028*	0.0571899*	0.135201*
-21.8801*	0.233643*	0.224609*	0.142334*	0.06427*	0.130554*
-21.78*	0.239868*	0.219116*	0.136841*	0.0626831*	0.13678*
-21.6801*	0.228149*	0.209723*	0.129028*	0.0626831*	0.134467*
-21.58*	0.238281*	0.211304*	0.13916*	0.0728149*	0.12738*
-21.48*	0.251587*	0.211304*	0.14856*	0.0916138*	0.148499*
-21.3801*	0.253174*	0.212891*	0.142334*	0.0720825*	0.136047*
-21.28*	0.261719*	0.219116*	0.150879*	0.0728149*	0.127393*
-21.1801*	0.268799*	0.22144*	0.160278*	0.0923462*	0.146916*
-21.08*	0.259399*	0.223022*	0.168091*	0.0939331*	0.13446*
-20.98*	0.260986*	0.212891*	0.161865*	0.0838013*	0.126659*
-20.8801*	0.278931*	0.228516*	0.165771*	0.0994263*	0.132874*
-20.78*	0.275757*	0.217529*	0.164917*	0.0923462*	0.141424*
-20.6801*	0.278931*	0.22535*	0.160278*	0.0884399*	0.144601*
-20.58*	0.282837*	0.225342*	0.171997*	0.0861206*	0.148499*
-20.48*	0.269531*	0.220703*	0.160278*	0.0861206*	0.148499*
-20.3801*	0.25708*	0.205078*	0.160278*	0.0759888*	0.138367*
-20.28*	0.25708*	0.205811*	0.156372*	0.0767212*	0.152412*
-20.1801*	0.259399*	0.211305*	0.168091*	0.0822144*	0.156312*
-20.08*	0.261719*	0.211304*	0.162598*	0.0744019*	0.15863*
-19.98*	0.268799*	0.212891*	0.179077*	0.0838013*	0.164127*
-19.8801*	0.267212*	0.217529*	0.164185*	0.0783081*	0.164124*
-19.78*	0.278931*	0.208984*	0.174316*	0.0822144*	0.173532*
-19.6801*	0.279663*	0.205821*	0.171997*	0.0845337*	0.17036*
-19.58*	0.28833*	0.211304*	0.168091*	0.101746*	0.174255*
-19.48*	0.290649*	0.219116*	0.185303*	0.113464*	0.18525*
-19.3801*	0.302368*	0.224609*	0.181396*	0.115051*	0.181335*
-19.28*	0.28833*	0.228516*	0.174316*	0.118958*	0.187566*
-19.1801*	0.278931*	0.207406*	0.173584*	0.105652*	0.193063*
-19.08*	0.292969*	0.219849*	0.178223*	0.11969*	0.185974*
-18.98*	0.298462*	0.230835*	0.195435*	0.129089*	0.189886*
-18.8801*	0.305542*	0.226196*	0.197021*	0.12677*	0.193054*
-18.78*	0.267212*	0.205811*	0.174316*	0.109558*	0.173522*
-18.6801*	0.265625*	0.190194*	0.166504*	0.0962524*	0.162545*
-18.58*	0.267212*	0.191772*	0.168091*	0.101746*	0.164124*
-18.48*	0.259399*	0.185547*	0.168091*	0.0923462*	0.164132*
-18.3801*	0.271118*	0.193359*	0.171265*	0.107239*	0.16803*
-18.28*	0.267212*	0.195679*	0.178223*	0.109558*	0.164131*
-18.1801*	0.278931*	0.199586*	0.187622*	0.111877*	0.175844*
-18.08*	0.271118*	0.190186*	0.189941*	0.115784*	0.15863*
-17.98*	0.267212*	0.199585*	0.207153*	0.134583*	0.175849*
-17.8801*	0.271118*	0.211304*	0.216553*	0.132996*	0.187561*
-17.78*	0.271118*	0.211304*	0.21106*	0.143127*	0.191472*
-17.6801*	0.277344*	0.199585*	0.205566*	0.132996*	0.185242*
-17.58*	0.259399*	0.187866*	0.197021*	0.132996*	0.164124*
-17.48*	0.268799*	0.189453*	0.194702*	0.122864*	0.164123*
-17.3801*	0.25708*	0.176147*	0.174316*	0.118958*	0.156311*
-17.28*	0.246094*	0.168335*	0.156372*	0.101746*	0.142282*
-17.1801*	0.242188*	0.172979*	0.168091*	0.104065*	0.141424*
-17.08*	0.241455*	0.191772*	0.156372*	0.113464*	0.146179*
-16.98*	0.242188*	0.191772*	0.164185*	0.121277*	0.144592*
-16.8801*	0.237549*	0.180054*	0.154785*	0.101746*	0.13678*
-16.78*	0.237549*	0.169922*	0.159546*	0.111145*	0.134455*
-16.6801*	0.207031*	0.158208*	0.143066*	0.0900269*	0.113347*
-16.58*	0.200806*	0.139404*	0.144653*	0.0900269*	0.115662*
-16.48*	0.196899*	0.158936*	0.156372*	0.0884399*	0.135189*
-16.3801*	0.183594*	0.133179*	0.14856*	0.0822144*	0.128967*
-16.28*	0.181274*	0.133179*	0.150879*	0.0744019*	0.118835*
-16.1801*	0.175049*	0.121467*	0.14856*	0.0650024*	0.115669*
-16.08*	0.191406*	0.125366*	0.160278*	0.0744019*	0.109436*
-15.98*	0.181274*	0.12146*	0.160278*	0.0759888*	0.117247*
-15.8801*	0.171143*	0.119141*	0.157959*	0.079895*	0.107117*
-15.78*	0.150024*	0.101929*	0.14856*	0.0587769*	0.0875926*
-15.6801*	0.161743*	0.103516*	0.14856*	0.0650024*	0.0977173*
-15.58*	0.153931*	0.109741*	0.14624*	0.06427*	0.0859985*
-15.48*	0.160156*	0.104248*	0.135254*	0.0689087*	0.0828209*
-15.3801*	0.142212*	0.0925293*	0.129028*	0.0532837*	0.078186*
-15.28*	0.139893*	0.0878906*	0.11499*	0.0525513*	0.077455*
-15.1801*	0.130493*	0.0823965*	0.11731*	0.0447388*	0.0687857*
-15.08*	0.121094*	0.0714111*	0.104004*	0.039978*	0.0765991*
-14.98*	0.114868*	0.074585*	0.100098*	0.0353394*	0.0586581*
-14.8801*	0.108643*	0.0722656*	0.107178*	0.0307007*	0.0579224*
-14.78*	0.0930176*	0.0527344*	0.0977783*	0.0220337*	0.0453491*
-14.6801*	0.0992432*	0.0589657*	0.0860596*	0.0197144*	0.0469418*
-14.58*	0.0969238*	0.05896*	0.0892334*	0.0236206*	0.046936*
-14.48*	0.0882568*	0.0495605*	0.0844727*	0.0119019*	0.0469322*
-14.3801*	0.0718994*	0.0332031*	0.0688477*	0.0142212*	0.0352173*
-14.28*	0.0812988*	0.0472412*	0.0860596*	0.0236206*	0.0375352*
-14.1801*	0.0773926*	0.039423*	0.0759277*	0.0111694*	0.0344791*
-14.08*	0.0562744*	0.02771*	0.0688477*	0.008*	0.0234985*
-13.98*	0.0703125*	0.0316162*	0.0782471*	0.0103149*	0.0234976*
-13.8801*	0.078125*	0.0316162*	0.0688477*	0.0119019*	0.024231*
-13.78*	0.0718994*	0.0316162*	0.064209*	0.0119019*	0.0328979*
-13.6801*	0.0640869*	0.026123*	0.0704346*	0.00641*	0.0274048*
-13.58*	0.0656738*	0.0355225*	0.0587158*	0.00409*	0.0180054*
-13.48*	0.0578613*	0.0214844*	0.0509033*	0.00409*	0.017272*
-13.3801*	0.0585938*	0.00977*	0.0587158*	0.00409*	0.00555*
-13.28*	0.0585938*	0.00659*	0.0454102*	-0.00763*	0.0047*
-13.1801*	0.0422363*	-0.00903*	0.0391846*	-0.00531*	0.00787*
-13.08*	0.0484619*	-0.00977*	0.0290527*	-0.00836*	-0.00616*
-12.98*	0.0523682*	-0.00745*	0.0196533*	-0.00531*	-0.00934*
-12.8801*	0.0406494*	-0.00513*	0.0134277*	-0.00604*	-0.0100708*
-12.78*	0.0351563*	-0.00745*	0.0102539*	-0.00763*	-0.00934*
-12.6801*	0.0344238*	-0.0136681*	0.00793*	-0.00531*	-0.010067*
-12.58*	0.0351563*	-0.0129395*	0.00793*	0.0025*	0.00238*
-12.48*	0.0227051*	-0.0175781*	-0.0022*	0.00568*	-0.0116549*
-12.3801*	0.0179443*	-0.0184326*	-0.00537*	0.000916*	-0.00543*
-12.28*	0.0328369*	-0.0136719*	0.00244*	0.017395*	0.0000596*
-12.1801*	0.024292*	-0.0214901*	-0.0022*	0.0158081*	-0.0217953*
-12.08*	0.0094*	-0.0285645*	-0.0194092*	0.00568*	-0.0296021*
-11.98*	0.0094*	-0.019165*	-0.0115967*	0.008*	-0.027277*
-11.8801*	0.0094*	-0.00977*	-0.0115967*	0.0197144*	-0.0256958*
-11.78*	0.0094*	-0.0292969*	-0.0100098*	0.0119019*	-0.0444875*
-11.6801*	0.00317*	-0.0113487*	0.000122*	0.0134888*	-0.0233727*
-11.58*	0.0179443*	-0.00281*	-0.00537*	0.0204468*	-0.0249634*
-11.48*	0.0133057*	0.00427*	-0.00928*	0.0236206*	-0.0295973*
-11.3801*	0.0094*	0.012085*	0.00171*	0.0314331*	-0.0327759*
-11.28*	0.000854*	-0.00195*	0.00562*	0.00958*	-0.0257015*
-11.1801*	-0.0117188*	-0.00976*	-0.0155029*	0.00177*	-0.0444875*
-11.08*	0.0094*	0.000366*	-0.0115967*	0.0142212*	-0.0217896*
-10.98*	0*	0.0011*	-0.0131836*	0.0103149*	-0.0366812*
-10.8801*	-0.0101318*	0.000366*	-0.0209961*	0.0025*	-0.0327759*
-10.78*	-0.0101318*	0.000366*	-0.0022*	0.0134888*	-0.0202084*
-10.6801*	-0.0163574*	-0.00744*	-0.0178223*	-0.00604*	-0.0350914*
-10.58*	-0.015625*	-0.00122*	-0.0170898*	0.00641*	-0.0265503*
-10.48*	-0.0273438*	-0.0175781*	-0.0288086*	-0.00531*	-0.0335026*
-10.3801*	-0.00854*	-0.00195*	-0.0217285*	0.00177*	-0.0233765*
-10.28*	-0.0202637*	-0.00745*	-0.0334473*	0.00336*	-0.0256977*
-10.1801*	-0.0218506*	-0.0129433*	-0.0428467*	0.00641*	-0.0288734*
-10.08*	-0.0390625*	-0.0175781*	-0.0428467*	-0.00763*	-0.0429077*
-9.98004*	-0.0319824*	-0.0214844*	-0.0545654*	-0.0193481*	-0.0530391*
-9.88007*	-0.0390625*	-0.0301514*	-0.0444336*	-0.0209351*	-0.0366821*
-9.78003*	-0.0476074*	-0.019165*	-0.0483398*	-0.0193481*	-0.0405884*
-9.68005*	-0.0531006*	-0.0386891*	-0.0373535*	-0.0271606*	-0.0413136*
-9.58002*	-0.046875*	-0.0253906*	-0.0311279*	-0.013855*	-0.0233765*
-9.48004*	-0.0351563*	-0.019165*	-0.0288086*	-0.0170288*	-0.0311856*
-9.38007*	-0.0319824*	-0.0230713*	-0.0217285*	-0.00214*	-0.0350952*
-9.28003*	-0.0358887*	-0.019165*	-0.029541*	-0.00763*	-0.0233717*
-9.18005*	-0.0335693*	-0.00903*	-0.0272217*	-0.00922*	-0.0256958*
-9.08002*	-0.03125*	-0.0113525*	-0.0350342*	-0.00763*	-0.0272827*
-8.98004*	-0.0179443*	-0.00586*	-0.0209961*	0.00568*	-0.0132375*
-8.88007*	-0.0179443*	0.000366*	-0.0115967*	0.0119019*	-0.00385*
-8.78003*	-0.0179443*	-0.00122*	-0.0194092*	0.0103149*	-0.0132437*
-8.68005*	-0.0218506*	-0.00513*	-0.0233154*	-0.00763*	-0.0100722*
-8.58002*	-0.0296631*	-0.00818*	-0.0233154*	-0.00763*	-0.0178833*
-8.48004*	-0.03125*	-0.0129395*	-0.0327148*	-0.0209351*	-0.0265469*
-8.38007*	-0.0358887*	-0.0152588*	-0.0389404*	-0.013855*	-0.0194702*
-8.28003*	-0.0374756*	-0.0152588*	-0.0373535*	-0.0154419*	-0.0288663*
-8.18005*	-0.0437012*	-0.0191636*	-0.0334473*	-0.00995*	-0.0139756*
-8.08002*	-0.0390625*	-0.019165*	-0.0405273*	-0.0193481*	-0.0178833*
-7.98004*	-0.0374756*	-0.0269775*	-0.0311279*	-0.0271606*	-0.0116529*
-7.88007*	-0.0413818*	-0.0292969*	-0.0209961*	-0.0193481*	-0.015564*
-7.78003*	-0.0374756*	-0.0113525*	-0.0115967*	-0.0170288*	-0.00385*
-7.68005*	-0.0499268*	-0.0113511*	-0.0201416*	-0.00995*	-0.0155625*
-7.58002*	-0.0413818*	0.000366*	-0.0115967*	-0.0154419*	-0.00385*
-7.48004*	-0.0452881*	0.00195*	-0.0155029*	-0.00763*	-0.00226*
-7.38007*	-0.0523682*	-0.00513*	-0.0249023*	-0.0209351*	-0.00702*
-7.28003*	-0.0491943*	-0.0168457*	-0.0288086*	-0.0255737*	-0.00383*
-7.18005*	-0.0413818*	0.012085*	-0.0115967*	-0.00922*	0.00787*
-7.08002*	-0.0390625*	0.00269*	-0.0115967*	-0.013855*	-0.00226*
-6.98004*	-0.0280762*	0.0214844*	-0.0100098*	-0.00995*	0.00555*
-6.88007*	-0.0374756*	0.00195*	-0.029541*	-0.0193481*	-0.0132446*
-6.78003*	-0.0429688*	0.00659*	-0.0147705*	-0.022522*	0.00238*
-6.68005*	-0.0358887*	0.00269*	-0.00769*	-0.0154419*	0.00946*
-6.58002*	-0.0374756*	0.00427*	-0.0194092*	-0.0271606*	0.00397*
-6.48004*	-0.0319824*	-0.00195*	-0.0123291*	-0.0216675*	0.00397*
-6.38007*	-0.0413818*	-0.00745*	-0.0131836*	-0.0271606*	0.0180054*
-6.28003*	-0.0413818*	-0.0175781*	-0.0115967*	-0.0255737*	0.015698*
-6.18005*	-0.0195313*	0.00818*	-0.00378*	-0.0115356*	0.0368042*
-6.08002*	-0.0296631*	0.00818*	-0.00378*	-0.0115356*	0.0352173*
-5.98004*	-0.03125*	-0.00122*	-0.0131836*	-0.0108032*	0.0359531*
-5.88007*	-0.0358887*	-0.00513*	-0.0194092*	-0.00372*	0.0391235*
-5.78003*	-0.0218506*	0.012085*	-0.0115967*	0.00409*	0.0469346*
-5.68005*	-0.0319824*	-0.00195*	-0.0217285*	0.00409*	0.046205*
-5.58002*	-0.0296631*	-0.00745*	-0.0311279*	0.00409*	0.046936*
-5.48004*	-0.0335693*	-0.0113525*	-0.0209961*	0.0134888*	0.0453553*
-5.38007*	-0.0234375*	-0.00745*	-0.0194092*	0.0298462*	0.0648804*
-5.28003*	-0.0195313*	-0.0113525*	-0.0115967*	0.0197144*	0.0469432*
-5.18005*	-0.00623*	-0.00743*	-0.0194092*	0.0236206*	0.0602536*
-5.08002*	-0.000732*	0.000366*	-0.0115967*	0.0314331*	0.0664673*
-4.98004*	-0.015625*	0.00427*	-0.0194092*	0.0220337*	0.066473*
-4.88007*	-0.0108643*	0.00195*	-0.0178223*	0.017395*	0.0680542*
-4.78003*	-0.0195313*	0.010498*	-0.0115967*	0.0134888*	0.0547533*
-4.68005*	-0.0218506*	0.00819*	-0.0233154*	0.000183*	0.0547619*
-4.58002*	-0.00781*	0.0222168*	-0.0131836*	0.0126343*	0.0632935*
-4.48004*	-0.0257568*	0.0136719*	-0.0194092*	0.0158081*	0.0391307*
-4.38007*	-0.0257568*	0.0238037*	-0.0194092*	0.008*	0.0328979*
-4.28003*	-0.0397949*	0.0159912*	-0.0334473*	0.00177*	0.0328994*
-4.18005*	-0.0491943*	-0.00195*	-0.0405273*	-0.00372*	0.015686*
-4.08002*	-0.0593262*	-0.019165*	-0.0686035*	-0.0154419*	0.00629*
-3.98004*	-0.0609131*	-0.0129395*	-0.0522461*	-0.0177612*	0.0274034*
-3.88007*	-0.0726318*	-0.0292969*	-0.0725098*	-0.0411987*	0.00787*
-3.78003*	-0.0820313*	-0.03479*	-0.0717773*	-0.0404663*	0.011776*
-3.68005*	-0.0960693*	-0.0480838*	-0.0897217*	-0.0584106*	-0.0116458*
-3.58002*	-0.0765381*	-0.0214844*	-0.0701904*	-0.0388794*	-0.00153*
-3.48004*	-0.0671387*	-0.0168457*	-0.0780029*	-0.02948*	0.01337*
-3.38007*	-0.0827637*	-0.0238037*	-0.0842285*	-0.0333862*	0.0133667*
-3.28003*	-0.0804443*	-0.0308838*	-0.0819092*	-0.0505981*	-0.00542*
-3.18005*	-0.0703125*	-0.028554*	-0.0678711*	-0.0498657*	0.0000715*
-3.08002*	-0.0609131*	-0.0308838*	-0.0725098*	-0.0505981*	0.015686*
-2.98004*	-0.0648193*	-0.0168457*	-0.0780029*	-0.0545044*	0.0219345*
-2.88007*	-0.0406494*	0.000366*	-0.0600586*	-0.0248413*	0.0453491*
-2.78003*	-0.0460205*	-0.00586*	-0.0686035*	-0.0255737*	0.0211963*
-2.68005*	-0.0531006*	0.00111*	-0.0545654*	-0.0170288*	0.02742*
-2.58002*	-0.0585938*	-0.00433*	-0.0600586*	0.000183*	0.0274048*
-2.48004*	-0.0452881*	-0.00903*	-0.0467529*	0.008*	0.0290022*
-2.38007*	-0.038208*	-0.00977*	-0.0513916*	0.0111694*	0.00165*
-2.28003*	-0.0484009*	-0.0183716*	-0.0514526*	0.0205078*	-0.00695*
-2.18005*	-0.0257568*	-0.0253892*	-0.045166*	0.0119019*	0.00946*
-2.08002*	-0.0280762*	-0.0355835*	-0.0233154*	0.017395*	0.000061*
-1.98004*	0.000793*	-0.00824*	0.00641*	0.0361328*	0.0399332*
-1.88007*	0.0320435*	0.0449219*	0.0430908*	0.0408325*	0.0485229*
-1.78003*	0.0172119*	0.0472412*	0.0469971*	0.0213013*	0.0313339*
-1.68005*	0.078125*	0.0948291*	0.0961914*	0.0806274*	0.0640674*
-1.58002*	0.0797119*	0.0996094*	0.0681152*	0.0704956*	0.0524292*
-1.48004*	0.0976563*	0.117554*	0.0548096*	0.0884399*	0.0539336*
-1.38007*	0.0703125*	0.131592*	0.0516357*	0.0728149*	0.0859985*
-1.28003*	0.0828857*	0.126953*	0.0603027*	0.0697632*	0.0875716*
-1.18005*	0.0546875*	0.112071*	0.0509033*	0.0337524*	0.0781965*
-1.08002*	0.0523682*	0.101929*	0.0603027*	0.0197144*	0.0859985*
-0.980042*	0.0289307*	0.0823975*	0.0375977*	-0.0100098*	0.050828*
-0.880066*	-0.015625*	0.0394287*	-0.00146*	-0.0733032*	-0.00153*
-0.780029*	0.0585938*	0.0964355*	0.0352783*	-0.0022*	0.0219855*
-0.680054*	0.122681*	0.145005*	0.0821533*	0.0376587*	0.125168*
-0.580017*	0.177368*	0.216736*	0.166504*	0.130615*	0.203186*
-0.480042*	0.165649*	0.230835*	0.0720215*	0.139282*	0.139179*
-0.380066*	0.157043*	0.236328*	0.113403*	0.130676*	0.0187988*
-0.280029*	-0.197632*	0.484009*	0.20874*	0.355652*	-0.336026*
-0.180054*	-0.764038*	0.475772*	0.0696411*	0.215027*	-1.32611*
-0.0800171*	-1.16327*	0.272217*	-0.0834961*	-0.331055*	-1.50775*
0.0199585	-0.491394*	0.238647*	-0.560791*	-0.833435*	-1.22495*
0.119934	0.246887*	-1.02386*	-1.31238*	-1.5451*	-0.478821*
0.219971	2.22974*	-0.550415*	-1.33813*	-1.66388*	0.623009*
0.319946	4.91486*	1.82119*	0.129028*	-0.283447*	0.612265*
0.419983	6.23517*	2.54016*	1.07355*	0.980652*	0.250061*
0.519958	4.88904*	1.98395*	0.971191*	0.937683*	-0.0704112*
0.619934	2.92969*	1.46362*	0.731323*	0.895447*	0.00708*
0.719971	0.972717*	0.896484*	0.489197*	0.811157*	0.0726519*
0.819946	-0.875732*	0.373715*	0.386841*	0.804138*	0.24841*
0.919983	-2.77808*	-0.149658*	0.141541*	0.690002*	0.285217*
1.01996	-4.32574*	-0.743347*	-0.0975342*	0.655701*	0.265605*
1.11993	-5.92493*	-1.34729*	-0.338135*	0.650208*	0.275085*
1.21997	-7.52808*	-1.98553*	-0.610779*	0.569763*	0.248461*
1.31995	-9.0304*	-2.49888*	-0.800659*	0.487732*	0.243792*
1.41998	-10.4711*	-2.9848*	-0.995178*	0.465027*	0.300842*
1.51996	-11.9086*	-3.46368*	-1.20142*	0.421326*	0.322712*
1.61993	-13.2742*	-3.88715*	-1.39362*	0.400208*	0.367249*
1.71997	-14.3851*	-4.32697*	-1.578*	0.361145*	0.386761*
1.81995	-15.3828*	-4.69887*	-1.7218*	0.355652*	0.437544*
1.91998	-16.3781*	-5.05896*	-1.87488*	0.325989	0.472717
2.01996	-17.4*	-5.39807*	-1.99518*	0.286926	0.490657
2.11993	-18.2922*	-5.63867*	-2.11005*	0.268921	0.536804
2.21997	-18.9851*	-5.91211*	-2.23816*	0.230652	0.556319
2.31995	-19.6843*	-6.1676*	-2.3866*	0.239258	0.546934
2.41998	-20.3187*	-6.38403*	-2.50305*	0.229065	0.588318
2.51996	-20.9437*	-6.63708*	-2.62799*	0.232239	0.604789
2.61993	-21.5172*	-6.88013*	-2.71631*	0.224426	0.614136
2.71997	-21.982*	-7.1012*	-2.80927*	0.216614	0.644581
2.81995	-22.421*	-7.32386*	-2.93347*	0.200989	0.628228
2.91998	-22.8367*	-7.50281*	-3.03351*	0.217346	0.635193
3.01996	-23.2234*	-7.63403*	-3.1319*	0.193176	0.668027
3.11993	-23.5101*	-7.76447*	-3.23193*	0.187683	0.666443
3.21997	-23.7578*	-7.88245*	-3.33734*	0.183044	0.665705
3.31995	-23.8945*	-7.95977*	-3.42017*	0.193176	0.665717
3.41998	-24.0344*	-8.05902*	-3.48505*	0.217346	0.701599
3.51996	-24.1617*	-8.17694*	-3.54828*	0.186951	0.704766
3.61993	-24.2961*	-8.26215*	-3.62726*	0.18219	0.696106
3.71997	-24.2992*	-8.29962*	-3.71082*	0.193176	0.725881
3.81995	-24.1781*	-8.31683*	-3.79755*	0.177551	0.717229
3.91998	-24.0961*	-8.31683*	-3.8233*	0.191589	0.734436
4.01996	-23.9898*	-8.32465*	-3.87958*	0.193176	0.734436
4.11993	-23.8398*	-8.33948*	-3.93427*	0.211121	0.753967
4.21997	-23.6836*	-8.26758*	-3.96393*	0.224426	0.775085
4.31995	-23.4601*	-8.19964*	-4.0163*	0.254089	0.771919
4.41998	-23.2398*	-8.11133*	-4.04596*	0.265808	0.777405
4.51996	-23.0328*	-8.05115*	-4.09674*	0.276794	0.784485
4.61993	-22.7813*	-7.96838*	-4.1413*	0.285339	0.774231
4.71997	-22.4836*	-7.87695*	-4.14911*	0.315002	0.777412
4.81995	-22.1492*	-7.76367*	-4.16626*	0.349426	0.789124
4.91998	-21.8164*	-7.67151*	-4.18427*	0.361145	0.796936
5.01996	-21.3555*	-7.56445*	-4.22174*	0.357971	0.794621
5.11993	-20.8812*	-7.46448*	-4.20532*	0.386108	0.79303
5.21997	-20.4273*	-7.36133*	-4.19989*	0.394714	0.804756
5.31995	-19.9688*	-7.20825*	-4.1936*	0.433777	0.816467
5.41998	-19.4859*	-7.02148*	-4.19989*	0.433777	0.822693
5.51996	-18.9898*	-6.85901*	-4.2077*	0.447083	0.828186
5.61993	-18.3835*	-6.66919*	-4.17877*	0.445496	0.825867
5.71997	-17.7984*	-6.48401*	-4.17407*	0.466614	0.82428
5.81995	-17.2546*	-6.30432*	-4.15692*	0.496277	0.835999
5.91998	-16.7117*	-6.08557*	-4.09985*	0.523621	0.834412
6.01996	-16.1164*	-5.85431*	-4.0647*	0.556458	0.845398
6.11993	-15.5062*	-5.63794*	-4.02252*	0.578308	0.833679
6.21997	-14.8461*	-5.41138*	-3.99829*	0.587708	0.824287
6.31995	-14.1375*	-5.16528*	-3.9577*	0.607971	0.846132
6.41998	-13.486*	-4.93091*	-3.92175*	0.640808	0.842224
6.51996	-12.8289*	-4.68481*	-3.85223*	0.669739	0.859436
6.61993	-12.1703*	-4.47778*	-3.80457*	0.697815	0.857117
6.71997	-11.4492*	-4.21997*	-3.7569*	0.708801	0.855537
6.81995	-10.7562*	-3.94653*	-3.72253*	0.730652	0.865667
6.91998	-10.0453*	-3.65741*	-3.67328*	0.749451	0.868835
7.01996	-9.20465*	-3.409*	-3.63501*	0.777527	0.872749
7.11993	-8.37262*	-3.13403*	-3.57642*	0.820496	0.88678
7.21997	-7.5437*	-2.87543*	-3.53735*	0.837708	0.885194
7.31995	-6.69452*	-2.59026*	-3.4632*	0.842346	0.881297
7.41998	-5.88824*	-2.30042*	-3.3952*	0.867371	0.896179
7.51996	-5.02258*	-2.04022*	-3.35376*	0.888489	0.888378
7.61993	-4.15625*	-1.7309*	-3.32251*	0.929871	0.904724
7.71997	-3.35229*	-1.44415*	-3.26782*	0.927551	0.903992
7.81995	-2.51874*	-1.17309*	-3.19751*	0.935364	0.892279
7.91998	-1.64532*	-0.879333*	-3.11163*	0.967346	0.891418
8.01996	-0.750732*	-0.574646*	-3.02411*	0.988464	0.894599
8.11993	0.114075*	-0.252747*	-2.97485*	1.00568	0.903992
8.21997	0.97583	0.0488281*	-2.92017*	1.008	0.896919
8.31995	1.83832	0.383978*	-2.84985*	1.02985	0.927435
8.41998	2.72034	0.674622	-2.81702*	1.05176	0.927429
8.51996	3.66486	1.00977	-2.75067*	1.08612	0.932074
8.61993	4.57813	1.33942	-2.6593*	1.11578	0.935974
8.71997	5.49927	1.62775	-2.5733*	1.1424	0.917306
8.81995	6.40161	1.96832	-2.48505*	1.16193	0.921936
8.91998	7.29456	2.27069	-2.44751*	1.17438	0.921936
9.01996	8.24377	2.57617	-2.3811*	1.18768	0.932069
9.11993	9.16797	2.87848	-2.3374*	1.20331	0.928162
9.21997	10.0992	3.21832	-2.2077*	1.24628	0.943061
9.31995	11.0266	3.55426	-2.12878*	1.26971	0.943054
9.41998	11.9141	3.84491	-2.03345*	1.28925	0.933655
9.51996	12.8258	4.1441	-1.94598*	1.28925	0.933661
9.61993	13.7649	4.44727	-1.87561*	1.31738	0.941467
9.71997	14.7172	4.82379	-1.76392*	1.34393	0.953187
9.81995	15.6742	5.14021	-1.68665*	1.35797	0.955518
9.91998	16.6422	5.47461	-1.57251*	1.38922	0.976624
10.02	17.5641	5.8316	-1.47333*	1.42987	0.974304
10.1199	18.4766	6.15582	-1.3772*	1.43689	0.964905
10.22	19.3851	6.50818	-1.2749*	1.46185	0.977362
10.3199	20.2914	6.8418	-1.2038*	1.50018	0.98053
10.42	21.1914	7.17694	-1.12488*	1.52521	0.98053
10.52	22.1133	7.52148	-1.05536*	1.55096	0.986023
10.6199	23.0078	7.83942	-0.986572*	1.58612	0.984436
10.72	23.9172	8.18475	-0.886597*	1.60724	0.992244
10.8199	24.8055	8.52772	-0.800659	1.61969	0.976629
10.92	25.707	8.88867	-0.723328	1.65411	0.976624
11.02	26.5898	9.23395	-0.63501	1.68768	0.984436
11.1199	27.4711	9.56598	-0.53894	1.71112	0.982849
11.22	28.3844	9.91992	-0.430298	1.7619	0.989933
11.3199	29.2617	10.2863	-0.32489	1.80017	0.993843
11.42	30.1625	10.6465	-0.199097	1.83844	0.996155
11.52	31.0477	10.9926	-0.0662842	1.86188	0.996166
11.6199	31.9141	11.3512	0.0462646	1.90179	1.00397
11.72	32.793	11.7183	0.161865	1.94781	1.01569
11.8199	33.6547	12.0777	0.261841	1.98846	1.02509
11.92	34.5164	12.434	0.375122	2.0213	1.02191
12.02	35.3789	12.7863	0.493896	2.04865	1.01569
12.1199	36.2368	13.1488	0.585266	2.09784	1.02509
12.22	37.0281	13.5097	0.656372	2.12201	1.01642
12.3199	37.8203	13.8848	0.763428	2.1424	1.01727
12.42	38.6508	14.2207	0.841553	2.16815	1.0141
12.52	39.4594	14.5699	0.918091	2.19159	0.997747
12.6199	40.2485	14.9074	1.03064	2.22833	1.00555
12.72	41.0508	15.2715	1.14465	2.25568	1.00947
12.8199	41.8266	15.6426	1.2439	2.30487	1.01178
12.92	42.6102	16.0004	1.33606	2.32281	1.01251
13.02	43.3618	16.377	1.43372	2.39471	1.02119
13.1199	44.1609	16.7379	1.5462	2.41815	1.02191
13.22	44.9164	17.0894	1.67981	2.4588	1.02509
13.3199	45.6547	17.4668	1.79858	2.508	1.01569
13.42	46.3953	17.8339	1.9165	2.53217	1.03595
13.52	47.1414	18.2168	2.02515	2.58221	1.0368
13.6199	47.8164	18.5621	2.14624	2.60175	1.0274
13.72	48.5024	18.941	2.2478	2.6416	1.02668
13.8199	49.1899	19.3184	2.37823	2.67596	1.03522
13.92	49.8758	19.6816	2.48682	2.70953	1.03363
14.02	50.5586	20.0488	2.62042	2.75018	1.02509
14.1199	51.2039	20.4081	2.77588	2.79077	1.02423
14.22	51.8641	20.7793	2.86731	2.81659	1.02741
14.3199	52.504	21.134	2.9892	2.83771	1.0384
14.42	53.1477	21.5121	3.12744	2.8869	1.05475
14.52	53.8172	21.8472	3.26184	2.90875	1.05549
14.6199	54.4907	22.1895	3.39777	2.93927	1.06415
14.72	55.1586	22.5684	3.51025	2.96893	1.07819
14.8199	55.7953	22.9137	3.62201	2.99786	1.07978
14.92	56.4836	23.2652	3.74622	3.02985	1.08441
15.02	57.1375	23.5957	3.84937	3.05878	1.07587
15.1199	57.8149	23.9199	3.96655	3.09161	1.07428
15.22	58.3781	24.2957	4.07043	3.11969	1.07429
15.3199	58.804	24.6715	4.21729	3.14081	1.0727
15.42	59.3305	25.0285	4.34314	3.17133	1.07587
15.52	60.0555	25.3887	4.4939	3.20331	1.0915
15.6199	60.7141	25.7683	4.63135	3.23846	1.09454
15.72	61.3563	26.1402	4.77905	3.26581	1.09773
15.8199	61.9758	26.516	4.90869	3.31891	1.11725
15.92	62.6297	26.8988	5.03687	3.35956	1.12897
16.02	63.1727	27.2964	5.16968	3.3869	1.13519
16.1199	63.6469	27.6777	5.29858	3.42133	1.13995
16.22	64.118	28.0972	5.44153	3.47675	1.14691
16.3199	64.6031	28.4457	5.58215	3.52045	1.14851
16.42	65.1274	28.8301	5.70093	3.57208	1.1579
16.52	65.6453	29.2168	5.81812	3.59784	1.16181
16.6199	66.1422	29.5941	5.93213	3.6236	1.15472
16.72	66.582	29.9473	6.07983	3.6908	1.17426
16.8199	66.936	30.3184	6.20325	3.72125	1.17743
16.92	67.3461	30.684	6.33765	3.76971	1.18207
17.02	67.7407	31.0543	6.45093	3.80255	1.18756
17.1199	68.193	31.3691	6.56262	3.82831	1.18524
17.22	68.7157	31.7379	6.68298	3.88068	1.18915
17.3199	69.1914	32.0746	6.797	3.92206	1.1938
17.42	69.7024	32.441	6.94385	3.96503	1.20709
17.52	70.2039	32.7621	7.07983	3.9986	1.20477
17.6199	70.6766	33.1051	7.1947	4.0307	1.19537
17.72	71.057	33.4574	7.33057	4.08295	1.21492
17.8199	71.4781	33.8238	7.46106	4.14001	1.22113
17.92	71.9344	34.141	7.60321	4.14703	1.22662
18.02	72.2469	34.5004	7.7439	4.20331	1.23993
18.1199	72.5359	34.8472	7.89075	4.25018	1.24225
18.22	72.9446	35.1761	8.03296	4.2713	1.23285
18.3199	73.3492	35.5097	8.17432	4.3111	1.22663
18.42	73.743	35.8636	8.33215	4.34943	1.24615
18.52	74.1063	36.1973	8.46027	4.36737	1.25556
18.6199	74.5243	36.5348	8.59155	4.40021	1.24615
18.72	74.8977	36.877	8.74072	4.42596	1.25397
18.8199	75.3172	37.2339	8.90948	4.44708	1.26178
18.92	75.7101	37.559	9.0415	4.47906	1.24615
19.02	76.0891	37.9105	9.16028	4.508	1.24616
19.1199	76.454	38.2418	9.30408	4.53925	1.26337
19.22	76.8336	38.5808	9.43994	4.58221	1.26801
19.3199	77.1727	38.9175	9.58215	4.61737	1.2735
19.42	77.5117	39.2097	9.71259	4.65094	1.26569
19.52	77.8563	39.5386	9.84387	4.68378	1.27582
19.6199	78.1821	39.834	9.95715	4.71429	1.28058
19.72	78.4899	40.1605	10.0822	4.7525	1.27814
19.8199	78.8094	40.4723	10.1986	4.78534	1.28059
19.92	79.1258	40.791	10.3282	4.84161	1.28363
20.02	79.3937	41.0964	10.465	4.85797	1.27741
20.1199	79.6609	41.3887	10.6017	4.89081	1.27509
20.22	79.9156	41.6973	10.7111	4.91193	1.27191
20.3199	80.2602	41.9801	10.8447	4.95099	1.27668
20.42	80.6437	42.3011	10.9618	4.98456	1.27423
20.52	80.3469	42.6566	11.1056	5.02203	1.28681
20.6199	80.936	42.9645	11.2455	5.05255	1.27899
20.72	81.2633	43.2777	11.4025	5.09003	1.29377
20.8199	81.4625	43.559	11.5587	5.12518	1.30244
20.92	81.7687	43.8495	11.7072	5.16266	1.30548
21.02	82.0477	44.1285	11.8361	5.20258	1.31964
21.1199	82.2899	44.416	11.9509	5.2486	1.31647
21.22	82.4938	44.7074	12.1033	5.27753	1.32587
21.3199	82.7415	44.9707	12.2189	5.30096	1.31488
21.42	82.968	45.2527	12.3439	5.3103	1.30865
21.52	83.1766	45.5402	12.4923	5.34003	1.32587
21.6199	83.3719	45.8152	12.6423	5.37518	1.33051
21.72	83.5898	46.0785	12.7618	5.40253	1.32661
21.8199	83.8196	46.3629	12.9048	5.45953	1.3454
21.92	83.9962	46.6191	13.0165	5.49554	1.3493
22.02	84.1774	46.9043	13.1704	5.51581	1.35395
22.1199	84.3859	47.1863	13.3126	5.55096	1.36334
22.22	84.6031	47.4668	13.4314	5.61969	1.37506
22.3199	84.7836	47.7012	13.5626	5.66351	1.38837
22.42	84.9914	47.9496	13.7228	5.69781	1.39691
22.52	85.1813	48.209	13.8806	5.74628	1.40473
22.6199	85.3937	48.4222	14.0126	5.77362	1.3985
22.72	85.5719	48.6895	14.1541	5.8111	1.40399
22.8199	85.7328	48.9004	14.283	5.85333	1.3946
22.92	85.9	49.148	14.4212	5.88849	1.39459
23.02	86.0446	49.3793	14.5321	5.94	1.40632
23.1199	86.1938	49.6277	14.6954	5.98297	1.40472
23.22	86.3547	49.8644	14.8447	6.02289	1.39777
23.3199	86.5266	50.0996	14.9712	6.05878	1.39301
23.42	86.6805	50.3386	15.0916	6.06659	1.38446
23.52	86.8	50.5918	15.2032	6.12128	1.37506
23.6199	86.9469	50.8152	15.3149	6.15875	1.38678
23.72	87.1086	51.0762	15.465	6.21271	1.39691
23.8199	87.2649	51.2848	15.5658	6.23224	1.39228
23.92	87.407	51.5121	15.6954	6.25409	1.3985
24.02	87.5687	51.7426	15.8368	6.3017	1.40082
24.1199	87.7703	51.9636	15.9666	6.3338	1.40863
24.22	87.9266	52.1926	16.097	6.36896	1.41181
24.3199	88.0461	52.4004	16.2072	6.3869	1.42352
24.42	88.193	52.6105	16.3126	6.41034	1.41644
24.52	88.3407	52.8356	16.4666	6.45331	1.43756
24.6199	88.5032	53.0504	16.6111	6.50018	1.43524
24.72	88.6383	53.2527	16.7626	6.5119	1.42817
24.8199	88.804	53.4847	16.8986	6.53925	1.44769
24.92	88.8954	53.7145	17.0361	6.5744	1.44305
25.02	88.9813	53.9379	17.1782	6.61658	1.45477
25.1199	89.111	54.1371	17.2837	6.64935	1.45551
25.22	89.2336	54.3324	17.4314	6.68927	1.4649
25.3199	89.3219	54.5308	17.5408	6.71735	1.46259
25.42	89.5961	54.7246	17.6642	6.75177	1.4649
25.52	89.7008	54.9418	17.7908	6.7713	1.46491
25.6199	89.7946	55.1503	17.8947	6.80096	1.4649
25.72	89.8469	55.3308	18.0314	6.85016	1.47504
25.8199	89.9547	55.5238	18.1353	6.88922	1.47895
25.92	90.0149	55.7223	18.2728	6.91351	1.48761
26.02	90.0883	55.9066	18.3868	6.94781	1.49225
26.1199	90.1813	56.0762	18.49	6.97675	1.49225
26.22	90.2805	56.2308	18.6235	7.0119	1.49299
26.3199	90.3547	56.4137	18.7533	7.04865	1.50946
26.42	90.4734	56.5902	18.8774	7.0744	1.51337
26.52	90.5836	56.7957	19.0236	7.10175	1.51801
26.6199	90.6829	56.9761	19.1345	7.15094	1.53522
26.72	90.8118	57.1316	19.2524	7.18146	1.53131
26.8199	90.8469	57.2848	19.3939	7.2088	1.529
26.92	90.8976	57.4418	19.5118	7.2486	1.53754
27.02	90.9703	57.6097	19.629	7.28143	1.54303
27.1199	91.0141	57.7551	19.7455	7.31036	1.52899
27.22	91.1305	57.8972	19.8579	7.3299	1.53131
27.3199	91.193	58.0316	19.9728	7.36029	1.51801
27.42	91.2649	58.1816	20.1111	7.40021	1.52509
27.52	91.3665	58.3324	20.2228	7.42987	1.51569
27.6199	91.4664	58.4691	20.3524	7.45331	1.5141
27.72	91.5992	58.623	20.4962	7.49078	1.50788
27.8199	91.725	58.7676	20.6454	7.53461	1.52118
27.92	91.8118	58.9238	20.7345	7.55878	1.52509
28.02	91.8649	59.0496	20.8634	7.58295	1.51643
28.1199	91.9016	59.1777	20.9962	7.62445	1.52118
28.22	91.9891	59.3129	21.1134	7.65802	1.5329
28.3199	92.0273	59.4457	21.2368	7.6806	1.52424
28.42	92.1102	59.5957	21.3728	7.72052	1.52509
28.52	92.1571	59.7402	21.4955	7.7619	1.52741
28.6199	92.2219	59.8676	21.6251	7.79083	1.5274
28.72	92.2344	59.9886	21.7423	7.815	1.52973
28.8199	92.2844	60.1176	21.8556	7.84784	1.53681
28.92	92.2985	60.2527	21.9556	7.8736	1.53595
29.02	92.3524	60.391	22.0736	7.91193	1.5384
29.1199	92.4039	60.5488	22.1915	7.95331	1.55865
29.22	92.4391	60.6582	22.3126	8.00177	1.54462
29.3199	92.4508	60.7879	22.4282	8.03217	1.54768
29.42	92.5172	60.9011	22.5431	8.0799	1.55865
29.52	92.5594	61.0426	22.6595	8.12286	1.57746
29.6199	92.5664	61.1667	22.7736	8.15875	1.57269
29.72	92.5719	61.3051	22.8735	8.19159	1.56647
29.8199	92.5953	61.4464	22.9806	8.22284	1.56647
29.92	92.6367	61.5707	23.0884	8.25409	1.56488
30.02	92.7125	61.7058	23.2048	8.28766	1.56415
30.1199	92.7438	61.8418	23.3243	8.31036	1.55475
30.22	92.8024	61.9926	23.4486	8.3338	1.57819
30.3199	92.8633	62.1394	23.5555	8.36188	1.57819
30.42	92.9531	62.2707	23.658	8.39081	1.57587
30.52	93.0055	62.4027	23.7712	8.42133	1.56806
30.6199	93.0789	62.5316	23.8876	8.44	1.58282
30.72	93.1813	62.6628	24.0001	8.49469	1.5954
30.8199	93.2664	62.7824	24.0923	8.53766	1.57892
30.92	93.3945	62.905	24.215	8.5744	1.58209
31.02	93.4649	63.0316	24.3533	8.60724	1.58137
31.1199	93.5765	63.1746	24.4923	8.64081	1.58673
31.22	93.6977	63.3035	24.6095	8.67206	1.58759
31.3199	93.8242	63.4222	24.6876	8.69	1.57819
31.42	93.9219	63.5652	24.8048	8.7182	1.58917
31.52	94.057	63.6941	24.9259	8.77045	1.59455
31.6199	94.1625	63.8347	25.0157	8.79315	1.5954
31.72	94.2555	63.9652	25.1212	8.82599	1.586
31.8199	94.3422	64.0769	25.2212	8.86578	1.58832
31.92	94.4415	64.2098	25.3439	8.8963	1.59698
32.02	94.5414	64.323	25.4626	8.92206	1.59381
32.1199	94.6469	64.448	25.5634	8.94391	1.59454
32.22	94.7742	64.5715	25.6697	8.99237	1.5954
32.3199	94.893	64.6722	25.7603	9.0119	1.58601
32.42	95.0258	64.7784	25.8634	9.04547	1.58673
32.52	95.1578	64.9082	25.9806	9.09552	1.59699
32.6199	95.2586	65.0113	26.104	9.13141	1.60553
32.72	95.379	65.1058	26.2087	9.16193	1.60713
32.8199	95.5117	65.2269	26.3204	9.21112	1.61176
32.92	95.657	65.323	26.4321	9.24469	1.60785
33.02	95.7563	65.4113	26.5298	9.27362	1.60322
33.1199	95.8633	65.5004	26.615	9.30646	1.60553
33.22	95.9695	65.5988	26.7079	9.34784	1.60004
33.3199	96.0688	65.698	26.8025	9.39081	1.60712
33.42	96.1859	65.7683	26.8876	9.41266	1.60004
33.52	96.3071	65.8699	27.004	9.46112	1.61725
33.6199	96.3492	65.9691	27.0837	9.48456	1.61725
33.72	96.4321	66.0574	27.172	9.5119	1.61725
33.8199	96.5399	66.1574	27.2665	9.54156	1.61725
33.92	96.6313	66.2488	27.3829	9.58221	1.61725
34.02	96.7008	66.3519	27.4689	9.59552	1.61885
34.1199	96.7859	66.4659	27.5845	9.63763	1.62579
34.22	96.8735	66.5574	27.697	9.67596	1.61884
34.3199	96.9922	66.6277	27.8032	9.69708	1.60944
34.42	97.0821	66.7129	27.9181	9.73615	1.6087
34.52	97.1586	66.8019	28.036	9.75482	1.60627
34.6199	97.2625	66.8957	28.158	9.79315	1.60712
34.72	97.361	66.9684	28.254	9.82599	1.60712
34.8199	97.4383	67.0465	28.3618	9.84235	1.61408
34.92	97.5352	67.1277	28.465	9.87286	1.60553
35.02	97.6141	67.2136	28.5555	9.89313	1.60554
35.1199	97.7321	67.2855	28.6564	9.92365	1.60712
35.22	97.8289	67.3738	28.7673	9.96112	1.61566
35.3199	97.9086	67.4441	28.8228	9.98065	1.60944
35.42	98.0023	67.505	28.9204	10.0025	1.60944
35.52	98.1251	67.5863	29.0157	10.0252	1.61103
35.6199	98.2148	67.6628	29.1157	10.0588	1.60162
35.72	98.2875	67.7332	29.2048	10.09	1.59381
35.8199	98.407	67.8113	29.2821	10.1142	1.59614
35.92	98.518	67.8723	29.3712	10.1408	1.5954
36.02	98.5899	67.9316	29.4259	10.1619	1.57429
36.1199	98.6743	67.9792	29.5118	10.2033	1.58368
36.22	98.7289	68.0339	29.5751	10.2111	1.57661
36.3199	98.8227	68.1137	29.6775	10.2447	1.59772
36.42	98.8961	68.1769	29.772	10.2619	1.60394
36.52	98.9438	68.2598	29.8728	10.283	1.59699
36.6199	98.9828	68.3292	29.9478	10.3033	1.58441
36.72	99.0586	68.4011	30.061	10.3439	1.60394
36.8199	99.1328	68.4457	30.1267	10.3635	1.58759
36.92	99.1688	68.4972	30.1985	10.3869	1.58051
37.02	99.2368	68.5769	30.3048	10.4221	1.58759
37.1199	99.2969	68.6394	30.3774	10.4322	1.5766
37.22	99.386	68.6957	30.4548	10.4565	1.57978
37.3199	99.4578	68.7644	30.5525	10.4908	1.58368
37.42	99.5195	68.823	30.6313	10.5197	1.57269
37.52	99.5602	68.8793	30.6938	10.5314	1.56648
37.6199	99.6336	68.9128	30.8087	10.565	1.56647
37.72	99.6969	68.9559	30.8845	10.5955	1.56806
37.8199	99.7461	69.0137	30.9501	10.6213	1.57428
37.92	99.8133	69.0543	31.0157	10.6353	1.57501
38.02	99.8711	69.1019	31.1001	10.6642	1.57587
38.1199	99.9274	69.1332	31.1486	10.6721	1.56488
38.22	99.9766	69.1808	31.2228	10.6955	1.55866
38.3199	100.031	69.2184	31.2853	10.7127	1.55793
38.42	100.104	69.2394	31.3618	10.7408	1.55707
38.52	100.173	69.2996	31.4556	10.7932	1.57587
38.6199	100.19	69.3308	31.5259	10.815	1.5672
38.72	100.26	69.3636	31.5955	10.8384	1.57037
38.8199	100.309	69.4051	31.6564	10.8572	1.56964
38.92	100.363	69.4496	31.7251	10.883	1.56488
39.02	100.405	69.473	31.7931	10.8947	1.54694
39.1199	100.459	69.5206	31.8618	10.9244	1.55707
39.22	100.48	69.5668	31.9415	10.9455	1.56415
39.3199	100.512	69.5902	32.0134	10.9643	1.55475
39.42	100.548	69.6238	32.0884	10.9807	1.55243
39.52	100.602	69.6534	32.1571	11.0142	1.55707
39.6199	100.656	69.7035	32.2345	11.0314	1.55865
39.72	100.699	69.7363	32.2845	11.0447	1.55793
39.8199	100.72	69.7761	32.3384	11.0705	1.55475
39.92	100.754	69.8074	32.3931	11.0923	1.55548
40.02	100.781	69.8503	32.4767	11.1252	1.57037
40.1199	100.809	69.8801	32.5353	11.1447	1.55634
40.22	100.821	69.9043	32.5939	11.1658	1.54853
40.3199	100.836	69.9324	32.6447	11.1721	1.55317
40.42	100.848	69.9597	32.7111	11.2017	1.55475
40.52	100.879	69.9832	32.7822	11.2228	1.55475
40.6199	100.909	70.0121	32.8439	11.233	1.55548
40.72	100.933	70.0496	32.9025	11.2557	1.54621
40.8199	100.955	70.0762	32.9509	11.2674	1.54303
40.92	100.965	70.091	33.0118	11.2814	1.54144
41.02	100.978	70.1199	33.0594	11.2939	1.52973
41.1199	100.995	70.1316	33.1228	11.3244	1.5368
41.22	101.001	70.1481	33.1603	11.3338	1.529
41.3199	101.035	70.1691	33.2095	11.3713	1.54694
41.42	101.063	70.1824	33.2563	11.3853	1.54926
41.52	101.091	70.2191	33.3298	11.4103	1.55243
41.6199	101.091	70.2386	33.3696	11.4221	1.54303
41.72	101.095	70.2504	33.4236	11.4354	1.54304
41.8199	101.116	70.2879	33.4806	11.4517	1.53523
41.92	101.134	70.3191	33.5493	11.4924	1.54694
42.02	101.148	70.3308	33.5923	11.5041	1.55316
42.1199	101.157	70.348	33.6439	11.5135	1.54071
42.22	101.125	70.3621	33.6923	11.5338	1.54926
42.3199	101.127	70.3738	33.7501	11.551	1.55634
42.42	101.125	70.3816	33.783	11.565	1.53522
42.52	101.127	70.4066	33.8212	11.5884	1.53754
42.6199	101.132	70.4207	33.8744	11.6072	1.54694
42.72	101.137	70.4418	33.9204	11.6229	1.53681
42.8199	101.141	70.4457	33.9813	11.6314	1.53754
42.92	101.138	70.448	34.0212	11.6525	1.55475
43.02	101.119	70.4598	34.0509	11.6564	1.54694
43.1199	101.116	70.4792	34.1095	11.6939	1.54694
43.22	101.156	70.5043	34.1704	11.7127	1.54694
43.3199	101.166	70.5199	34.2025	11.7166	1.54621
43.42	101.199	70.5082	34.2485	11.7307	1.54303
43.52	101.219	70.5011	34.2798	11.7447	1.53596
43.6199	101.233	70.5277	34.3322	11.772	1.54694
43.72	101.253	70.5277	34.3774	11.7791	1.54462
43.8199	101.241	70.5363	34.4236	11.7814	1.54535
43.92	101.252	70.5417	34.4618	11.7978	1.52972
44.02	101.273	70.5551	34.5072	11.8377	1.55011
44.1199	101.311	70.5707	34.5415	11.8557	1.53522
44.22	101.316	70.559	34.5822	11.8557	1.53363
44.3199	101.336	70.5613	34.5939	11.858	1.52192
44.42	101.314	70.5715	34.6329	11.8752	1.52899
44.52	101.305	70.5684	34.672	11.8885	1.51887
44.6199	101.334	70.598	34.715	11.9142	1.51019
44.72	101.356	70.5909	34.7446	11.9221	1.50629
44.8199	101.41	70.6003	34.7775	11.9221	1.50556
44.92	101.468	70.5918	34.8126	11.9354	1.49615
45.02	101.494	70.6058	34.8494	11.9494	1.49616
45.1199	101.52	70.5964	34.8798	11.9517	1.49615
45.22	101.527	70.6183	34.9314	11.9752	1.49616
45.3199	101.546	70.6035	34.9611	11.9838	1.49616
45.42	101.563	70.6097	34.9923	11.9807	1.49615
45.52	101.574	70.6105	35.0415	11.9947	1.49616
45.6199	101.598	70.6316	35.0626	12.0064	1.48834
45.72	101.592	70.6394	35.1102	12.0338	1.48517
45.8199	101.602	70.6472	35.1501	12.0432	1.48602
45.92	101.595	70.6309	35.172	12.0463	1.4704
46.02	101.559	70.6277	35.2087	12.0689	1.46259
46.1199	101.577	70.641	35.243	12.0845	1.46564
46.22	101.59	70.6355	35.272	12.0939	1.46881
46.3199	101.563	70.6293	35.3041	12.1088	1.4704
46.42	101.591	70.6293	35.3345	12.1236	1.4649
46.52	101.603	70.6355	35.3813	12.1314	1.45551
46.6199	101.619	70.616	35.4142	12.1252	1.44928
46.72	101.609	70.6176	35.4408	12.1463	1.45637
46.8199	101.616	70.6293	35.4868	12.1658	1.45319
46.92	101.625	70.6176	35.5126	12.1744	1.45392
47.02	101.629	70.6042	35.5408	12.1838	1.45477
47.1199	101.638	70.5902	35.561	12.1822	1.43597
47.22	101.623	70.6144	35.6095	12.1916	1.43366
47.3199	101.631	70.6074	35.6423	12.1971	1.43525
47.42	101.662	70.5964	35.6728	12.2228	1.43524
47.52	101.641	70.6042	35.7173	12.2252	1.42817
47.6199	101.634	70.6019	35.7572	12.2361	1.42975
47.72	101.648	70.587	35.7915	12.2525	1.43757
47.8199	101.658	70.5996	35.8204	12.2619	1.42426
47.92	101.658	70.5918	35.8541	12.2635	1.4173
48.02	101.646	70.5847	35.8829	12.2697	1.40241
48.1199	101.659	70.5558	35.9048	12.272	1.40082
48.22	101.685	70.559	35.9337	12.2814	1.39459
48.3199	101.666	70.5472	35.9611	12.2814	1.38678
48.42	101.673	70.5511	35.9845	12.283	1.38605
48.52	101.686	70.5339	36.0197	12.2892	1.38129
48.6199	101.689	70.5183	36.0454	12.3056	1.36566
48.72	101.707	70.5199	36.1017	12.3244	1.38446
48.8199	101.705	70.5183	36.1157	12.3377	1.36566
48.92	101.691	70.5027	36.1493	12.3463	1.36176
49.02	101.697	70.491	36.1892	12.3439	1.36884
49.1199	101.689	70.4629	36.215	12.3455	1.3493
49.22	101.703	70.4558	36.2439	12.3596	1.35944
49.3199	101.711	70.4324	36.2728	12.3642	1.34614
49.42	101.745	70.4379	36.2963	12.3846	1.34772
49.52	101.73	70.4183	36.3306	12.3908	1.33368
49.6199	101.699	70.3995	36.354	12.3853	1.31879
49.72	101.685	70.4004	36.3853	12.3869	1.32587
49.8199	101.667	70.4012	36.4095	12.3885	1.31648
49.92	101.676	70.4089	36.454	12.4048	1.31879
50.02	101.664	70.4082	36.4946	12.4142	1.32819
50.1199	101.665	70.3754	36.5267	12.4158	1.31573
50.22	101.666	70.3894	36.5516	12.4127	1.3133
50.3199	101.66	70.3855	36.5923	12.4236	1.31647
50.42	101.637	70.4011	36.6259	12.4322	1.30707
50.52	101.628	70.409	36.6595	12.4315	1.30793
50.6199	101.627	70.4277	36.6938	12.4494	1.31488
50.72	101.617	70.4191	36.7274	12.454	1.29926
50.8199	101.613	70.4207	36.7595	12.4728	1.30634
50.92	101.589	70.4199	36.7751	12.4744	1.28912
51.02	101.586	70.4105	36.7915	12.4822	1.28681
51.1199	101.576	70.3972	36.8149	12.483	1.27972
51.22	101.566	70.3871	36.8416	12.5041	1.29853
51.3199	101.563	70.3949	36.8618	12.5197	1.30244
51.42	101.566	70.3878	36.8931	12.522	1.30548
51.52	101.558	70.3785	36.9158	12.5252	1.29621
51.6199	101.541	70.3519	36.9321	12.5338	1.29303
51.72	101.534	70.3175	36.9438	12.5455	1.29535
51.8199	101.513	70.309	36.9634	12.5549	1.30316
51.92	101.496	70.2784	36.9868	12.5572	1.29144
52.02	101.488	70.266	37.0056	12.5549	1.29852
52.1199	101.48	70.2504	37.0275	12.5565	1.27899
52.22	101.465	70.2371	37.061	12.5666	1.29377
52.3199	101.464	70.209	37.0861	12.5838	1.29621
52.42	101.451	70.1996	37.0978	12.5783	1.29303
52.52	101.436	70.155	37.1063	12.5728	1.27742
52.6199	101.455	70.1355	37.1407	12.59	1.28363
52.72	101.441	70.1277	37.1548	12.5822	1.27508
52.8199	101.411	70.1012	37.1595	12.5838	1.25946
52.92	101.41	70.073	37.1798	12.5822	1.25238
53.02	101.388	70.0597	37.1844	12.5845	1.24848
53.1199	101.391	70.0551	37.2032	12.5822	1.24615
53.22	101.375	70.0519	37.2134	12.5869	1.24617
53.3199	101.373	70.059	37.2446	12.6135	1.24616
53.42	101.355	70.0504	37.2556	12.6033	1.24615
53.52	101.323	70.0191	37.2642	12.6041	1.23835
53.6199	101.306	70.0082	37.2759	12.6057	1.22662
53.72	101.296	69.9824	37.2869	12.6049	1.22663
53.8199	101.283	69.9753	37.3009	12.6041	1.22431
53.92	101.273	69.9574	37.3055	12.6041	1.20709
54.02	101.276	69.948	37.3243	12.6135	1.20709
54.1199	101.255	69.9379	37.3361	12.6072	1.19537
54.22	101.254	69.948	37.3735	12.6119	1.20319
54.3199	101.242	69.9535	37.3829	12.619	1.2016
54.42	101.224	69.9066	37.3923	12.6057	1.18915
54.52	101.221	69.8878	37.4032	12.6119	1.19769
54.6199	101.193	69.8496	37.4259	12.6135	1.19928
54.72	101.188	69.8292	37.4243	12.6174	1.18757
54.8199	101.184	69.8168	37.4478	12.6314	1.18598
54.92	101.157	69.8011	37.4603	12.619	1.18134
55.02	101.143	69.8074	37.4829	12.6275	1.18757
55.1199	101.127	69.7871	37.4946	12.6268	1.17426
55.22	101.127	69.7777	37.504	12.6346	1.1673
55.3199	101.098	69.7902	37.5142	12.6415	1.15864
55.42	101.085	69.766	37.5369	12.633	1.16571
55.52	101.073	69.7441	37.5587	12.6424	1.16413
55.6199	101.066	69.7113	37.5587	12.6408	1.1524
55.72	101.041	69.6863	37.5728	12.6431	1.15473
55.8199	101.039	69.6941	37.5767	12.6525	1.16413
55.92	101.034	69.6855	37.5853	12.6658	1.1673
56.02	101.041	69.6652	37.6009	12.676	1.17267
56.1199	101.023	69.6667	37.6251	12.6799	1.16803
56.22	101.002	69.6589	37.6274	12.6822	1.17036
56.3199	101.007	69.6387	37.6345	12.6854	1.1673
56.42	100.991	69.616	37.6407	12.6783	1.15631
56.52	100.969	69.5879	37.6525	12.6642	1.14301
56.6199	100.957	69.5792	37.6571	12.6666	1.1391
56.72	100.943	69.5684	37.6853	12.6674	1.13996
56.8199	100.933	69.5433	37.6915	12.6799	1.13678
56.92	100.914	69.5339	37.7017	12.6822	1.12506
57.02	100.91	69.5144	37.7111	12.6666	1.11176
57.1199	100.896	69.5254	37.7322	12.6658	1.11884
57.22	100.882	69.5144	37.7407	12.6721	1.1032
57.3199	100.863	69.4988	37.7391	12.6509	1.08443
57.42	100.873	69.5261	37.754	12.6666	1.09613
57.52	100.888	69.5316	37.7556	12.6658	1.10554
57.6199	100.884	69.5277	37.772	12.676	1.10944
57.72	100.881	69.5105	37.7759	12.6548	1.08832
57.8199	100.866	69.5238	37.7657	12.6658	1.09931
57.92	100.853	69.5137	37.7736	12.6721	1.10553
58.02	100.873	69.505	37.7798	12.6642	1.11177
58.1199	100.882	69.4847	37.811	12.6838	1.12897
58.22	100.855	69.4496	37.808	12.6877	1.10871
58.3199	100.824	69.4121	37.797	12.6877	1.10164
58.42	100.811	69.4034	37.7977	12.7111	1.09222
58.52	100.808	69.3676	37.8087	12.715	1.08052
58.6199	100.797	69.3503	37.8329	12.7548	1.086
58.72	100.788	69.3246	37.822	12.7713	1.08601
58.8199	100.773	69.2777	37.8048	12.758	1.0821
58.92	100.748	69.2253	37.7837	12.7244	1.05243
59.02	100.748	69.1605	37.8064	12.733	1.07429
59.1199	100.719	69.1215	37.7462	12.7033	1.03131
59.22	100.734	69.0964	37.7603	12.7674	1.04694
59.3199	100.659	69.0434	37.7407	12.7955	1.02975
59.42	100.683	69.2214	37.7166	12.8736	0.993835
59.52	100.806	69.252	37.7993	13.0822	1.11162
59.6199	100.053*	68.3543*	37.3666*	12.6463*	0.849304*
59.72	99.3571*	67.7566*	37.047*	12.9455*	0.640313*
59.8199	98.6399*	68.1889*	37.5157*	13.3745*	0.793349*
59.92	97.0789*	67.9449*	37.9095*	13.7861*	0.79303*
60.02	95.7422*	68.416*	38.3986*	14.083*	1.14128*
60.1199	95.1868*	70.3215*	39.6548*	14.6572*	1.51099*
60.22	93.7626*	68.9051*	38.9681*	13.6549*	1.97036*
60.3199	93.2633*	67.1339*	37.1095	11.94	1.01101
60.42	94.9031*	67.6394*	37.3141	11.9775	0.875061
60.52	96.9875*	68.3652*	37.4767	11.847	0.908091
60.6199	98.7532*	69.1316*	37.897	11.9221	0.932068
60.72	100.298*	69.7457*	38.1884	11.9783	0.97119
60.8199	101.921*	70.2746*	38.3532	11.89	0.932905
60.92	103.47*	70.6918*	38.5314	11.9322	0.845398
61.02	104.787*	71.1675*	38.7548	12.0322	0.813323
61.1199	106.194*	71.7191*	38.9103	12.0119	0.789124
61.22	107.11*	72.2145*	39.0509	11.7643	0.747747
61.3199	108.287*	72.5996*	39.1548	11.6923	0.715652
61.42	109.452*	73.0332*	39.2244	11.5705	0.691467
61.52	110.613*	73.4214*	39.3204	11.6221	0.68366
61.6199	111.616*	73.6808*	39.3103	11.5486	0.670349
61.72	112.412*	73.905*	39.3494	11.4908	0.642273
61.8199	113.035*	74.1027*	39.3275	11.397	0.613347
61.92	113.694*	74.2722*	39.3001	11.283	0.585999
62.02	114.42*	74.4301	39.2259	11.1627	0.564877
62.1199	115.067*	74.5527	39.1572	11.1096	0.51886
62.22	115.724*	74.6543	39.0814	11.0298	0.500051
62.3199	116.264*	74.7285	38.9775	10.9197	0.450085
62.42	116.745*	74.7105	38.8587	10.8361	0.439148
62.52	117.085*	74.6989	38.7423	10.7135	0.415716
62.6199	117.51*	74.6754	38.6266	10.6174	0.407043
62.72	117.964*	74.6301	38.5204	10.5064	0.388372
62.8199	118.299*	74.5519	38.3829	10.426	0.37506
62.92	118.616*	74.4855	38.204	10.3455	0.364929
63.02	118.881*	74.3957	38.0322	10.2564	0.326598
63.1199	119.098*	74.28	37.8446	10.1666	0.316467
63.22	119.24*	74.0668	37.6954	10.1252	0.316462
63.3199	119.378*	73.8441	37.4579	10.0181	0.299263
63.42	119.452*	73.6488	37.2579	9.95721	0.298523
63.52	119.577*	73.4183	37.0626	9.86664	0.285218
63.6199	119.612*	73.1918	36.8314	9.79236	0.285217
63.72	119.479*	72.9926	36.6056	9.68927	0.268017
63.8199	119.344*	72.7894	36.3931	9.63531	0.277411
63.92	119.305*	72.5598	36.1837	9.55804	0.276672
64.02	119.276*	72.2246	35.9415	9.4541	0.26569
64.1199	119.256*	71.9199	35.7196	9.3736	0.260193
64.22	119.234*	71.5778	35.5001	9.29474	0.246149
64.3199	119.124*	71.2769	35.2524	9.1955	0.236754
64.42	118.927*	70.955	35.0204	9.09235	0.236755
64.52	118.717*	70.5754	34.8126	9.00568	0.229795
64.6199	118.441*	70.2285	34.5868	8.91888	0.215637
64.72	118.152*	69.866	34.347	8.80646	0.198549
64.8199	117.87*	69.5035	34.1298	8.74396	0.197698
64.92	117.559*	69.155	33.9103	8.65332	0.207092
65.02	117.283*	68.7512	33.6931	8.55255	0.193055
65.1199	116.991*	68.337	33.4657	8.46112	0.175842
65.22	116.685*	67.9035	33.215	8.36578	0.166441
65.3199	116.278*	67.5082	32.9869	8.25568	0.165712
65.42	115.843*	67.1066	32.7775	8.16583	0.150085
65.52	115.427*	66.6808	32.5767	8.09314	0.145328
65.6199	115.015*	66.2668	32.3735	8.00958	0.148499
65.72	114.559*	65.8371	32.1392	7.91815	0.140689
65.8199	114.092*	65.4261	31.9181	7.83221	0.125054
65.92	113.736*	65.0113	31.6821	7.71112	0.115662
66.02	113.325*	64.6293	31.4298	7.65485	0.111022
66.1199	112.88*	64.2355	31.2048	7.57599	0.107117
66.22	112.401*	63.8621	30.9673	7.50409	0.0961375
66.3199	111.857*	63.4832	30.7618	7.43219	0.109436
66.42	111.317*	63.0863	30.5353	7.34784	0.0993042
66.52	110.777*	62.6691	30.3228	7.27289	0.0859976
66.6199	110.215*	62.2933	30.1056	7.18066	0.093811
66.72	109.774*	61.8995	29.8915	7.13531	0.0938072
66.8199	109.289*	61.5168	29.6658	7.05646	0.0883164
66.92	108.769*	61.0941	29.4587	6.98065	0.0836792
67.02	108.173*	60.684	29.2235	6.89471	0.0781822
67.1199	107.528*	60.2449	29.0063	6.79547	0.0687866
67.22	106.917*	59.8402	28.7947	6.72833	0.0563297
67.3199	106.263*	59.3855	28.5454	6.65485	0.0297279
67.42	105.67*	58.9988	28.3322	6.60175	0.0336304
67.52	105.152*	58.6262	28.1157	6.53375	0.0211849
67.6199	104.661	58.266	27.9119	6.47833	0.0172729
67.7199	104.097	57.8464	27.686	6.41815	-0.00152
67.82	103.48	57.4972	27.479	6.35406	0.00628
67.92	102.88	57.123	27.2423	6.2713	-0.0256958
68.02	102.245	56.7605	27.0447	6.1955	-0.0296021
68.1199	101.675	56.3832	26.8517	6.15643	-0.0350966
68.2199	101.088	56.041	26.658	6.09003	-0.0351019
68.32	100.477	55.6573	26.4368	6.00018	-0.0444984
68.42	99.8665	55.28	26.2478	5.92676	-0.0608473
68.52	99.2875	54.9089	26.0728	5.86737	-0.0468187
68.6199	98.6938	54.5277	25.9001	5.81195	-0.0546331
68.7199	98.1297	54.1644	25.6884	5.72125	-0.0562115
68.82	97.5532	53.7801	25.5134	5.65411	-0.0624399
68.92	96.9868	53.4285	25.3204	5.56891	-0.0647593
69.02	96.4055	53.0652	25.147	5.50641	-0.0656118
69.1199	95.8422	52.7113	24.9705	5.45331	-0.06317
69.2199	95.2446	52.3613	24.7931	5.3963	-0.0601158
69.32	94.6742	51.9957	24.6024	5.34235	-0.0444984
69.42	94.082	51.6543	24.4142	5.28375	-0.0608449
69.52	93.5164	51.323	24.2563	5.21661	-0.048408
69.6199	92.9508	50.9785	24.0837	5.16425	-0.0413265
69.7199	92.3602	50.6394	23.8829	5.07831	-0.0624404
69.82	91.8087	50.3207	23.7032	5.02362	-0.0725727
69.92	91.2445	49.9949	23.5181	4.98065	-0.0741544
70.02	90.6758	49.6824	23.3579	4.95563	-0.0718417
70.1199	90.1329	49.377	23.1931	4.90411	-0.0741634
70.2199	89.5781	49.0378	23.004	4.85175	-0.0803843
70.32	89.0539	48.7371	22.8228	4.78143	-0.0874624
70.42	88.5367	48.4387	22.658	4.72125	-0.0913625
70.52	88.0242	48.1332	22.4931	4.69391	-0.0686717
70.6199	87.4742	47.8145	22.322	4.6557	-0.0624447
70.7199	86.9219	47.4965	22.1462	4.61188	-0.0741587
70.82	86.3875	47.2058	21.9852	4.58221	-0.0819683
70.92	85.8625	46.9066	21.8142	4.54083	-0.0842953
71.02	85.3086	46.5964	21.6642	4.49469	-0.0991764
71.1199	84.7875	46.3285	21.5103	4.46271	-0.0921035
71.2199	84.2672	46.0137	21.347	4.42365	-0.0858831
71.32	83.725	45.6808	21.186	4.37982	-0.0991859
71.42	83.1992	45.3777	21.0298	4.35406	-0.110895
71.52	82.6891	45.0957	20.879	4.3432	-0.0905209
71.6199	82.2133	44.8051	20.7407	4.3017	-0.0991859
71.7199	81.7407	44.5043	20.572	4.25568	-0.110895
71.82	81.2688	44.2347	20.4197	4.22052	-0.103827
71.92	80.7953	43.9347	20.2603	4.17279	-0.113225
72.02	80.3024	43.6465	20.0978	4.11273	-0.121027
72.1199	79.8227	43.3191	19.922	4.08221	-0.132747
72.2199	79.3727	43.0746	19.7814	4.04938	-0.123346
72.32	78.9047	42.8363	19.6376	4.03143	-0.118719
72.42	78.4547	42.5652	19.4822	4.00409	-0.132752
72.52	77.9844	42.3066	19.3322	3.97125	-0.136657
72.6199	77.543	42.0652	19.2072	3.9549	-0.124933
72.7199	77.0751	41.8262	19.0525	3.93378	-0.123358
72.82	76.6313	41.5746	18.9087	3.90411	-0.142147
72.92	76.1937	41.3214	18.7798	3.88531	-0.124943
73.02	75.7516	41.0957	18.6501	3.85406	-0.132748
73.1199	75.3087	40.8441	18.5275	3.82208	-0.14447
73.2199	74.8828	40.6066	18.4009	3.77362	-0.140568
73.32	74.457	40.3582	18.2736	3.74237	-0.152284
73.42	74.025	40.1074	18.1486	3.71112	-0.164002
73.52	73.6016	39.8754	18.0095	3.70172	-0.164001
73.6199	73.2109	39.6449	17.9071	3.69391	-0.152288
73.7199	72.775	39.3949	17.7689	3.6557	-0.174134
73.82	72.3672	39.1644	17.6274	3.64313	-0.173402
73.92	71.9235	38.923	17.5181	3.633	-0.177304
74.02	71.5024	38.7074	17.4009	3.60406	-0.178043
74.1199	71.1008	38.4769	17.3025	3.59161	-0.171821
74.2199	70.6696	38.2559	17.1674	3.56036	-0.185853
74.32	70.2773	38.0238	17.0571	3.54083	-0.192925
74.42	69.8727	37.7957	16.9611	3.52985	-0.183534
74.52	69.475	37.5847	16.8485	3.51031	-0.185119
74.6199	69.0797	37.3574	16.7494	3.48383	-0.192079
74.7199	68.6914	37.1332	16.629	3.47125	-0.195252
74.82	68.2852	36.9128	16.5165	3.44781	-0.206236
74.92	67.8977	36.6934	16.4314	3.43378	-0.192083
75.02	67.5016	36.4675	16.3228	3.40411	-0.203058
75.1199	67.1703	36.2777	16.2189	3.39703	-0.194516
75.2199	66.7969	36.0676	16.0939	3.3775	-0.191347
75.32	66.4508	35.8574	15.9861	3.36664	-0.192079
75.42	66.1617	35.6644	15.8696	3.34003	-0.192926
75.52	65.8375	35.4824	15.7791	3.33221	-0.185858
75.6199	65.4789	35.28	15.6564	3.3111	-0.208554
75.7199	65.1656	35.0863	15.5728	3.29474	-0.209286
75.82	64.8571	34.8926	15.4767	3.28143	-0.197577
75.92	64.5078	34.7019	15.379	3.26971	-0.217953
76.02	64.2109	34.5168	15.2915	3.25641	-0.200748
76.1199	63.8883	34.3317	15.2205	3.24786	-0.192084
76.2199	63.5297	34.1003	15.1157	3.21967	-0.196835
76.32	63.2227	33.9246	15.0353	3.21661	-0.200746
76.42	62.9094	33.7246	14.9415	3.20099	-0.201479
76.52	62.6094	33.53	14.8595	3.16888	-0.214781
76.6199	62.2891	33.3558	14.772	3.16425	-0.203065
76.7199	61.9915	33.1738	14.7103	3.14398	-0.210882
76.82	61.6875	32.9926	14.6212	3.1236	-0.222597
76.92	61.3688	32.8402	14.547	3.11273	-0.22333
77.02	61.0547	32.6589	14.465	3.09625	-0.231993
77.1199	60.7578	32.4847	14.3915	3.08453	-0.231995
77.2199	60.4469	32.3246	14.322	3.07672	-0.222589
77.32	60.1399	32.1722	14.2618	3.08539	-0.222596
77.42	59.8438	32.0066	14.1814	3.0705	-0.222596
77.52	59.5352	31.8519	14.0868	3.0517	-0.222594
77.6199	59.2711	31.6957	14.0134	3.05646	-0.210878
77.7199	58.9664	31.5449	13.9314	3.04083	-0.210877
77.82	58.6946	31.391	13.8579	3.02203	-0.213197
77.92	58.4109	31.2238	13.7782	3.01813	-0.214048
78.02	58.1259	31.0707	13.7025	3.00336	-0.211611
78.1199	57.8359	30.9066	13.6118	2.98297	-0.212464
78.2199	57.557	30.7761	13.5376	2.98297	-0.212464
78.32	57.2743	30.6348	13.4509	2.97443	-0.211607
78.42	57.0039	30.4847	13.4001	2.97284	-0.212463
78.52	56.7266	30.3542	13.3501	2.96503	-0.200745
78.6199	56.4563	30.2012	13.2986	2.98065	-0.197569
78.7199	56.1953	30.0746	13.2681	2.97443	-0.201478
78.82	55.9258	29.9324	13.2072	2.96185	-0.206234
78.92	55.668	29.7972	13.1509	2.96661	-0.197567
79.02	55.3954	29.6934	13.0916	2.96112	-0.185855
79.1199	55.1344	29.5512	13.047	2.94318	-0.206971
79.2199	54.8836	29.4191	12.9712	2.93842	-0.206236
79.32	54.6594	29.2832	12.922	2.93378	-0.199896
79.42	54.418	29.1449	12.8556	2.91583	-0.212459
79.52	54.2086	29.0457	12.8103	2.92047	-0.195256
79.6199	53.9766	28.9324	12.7274	2.92206	-0.206967
79.7199	53.7578	28.8285	12.6954	2.91656	-0.200745
79.82	53.5305	28.7058	12.6228	2.91583	-0.191342
79.92	53.293	28.5644	12.5806	2.91034	-0.195257
80.02	53.0735	28.434	12.5291	2.90094	-0.201471
80.1199	52.8727	28.3207	12.49	2.91351	-0.185859
80.2199	52.625	28.1941	12.4266	2.89935	-0.206234
80.32	52.4258	28.0863	12.4041	2.8963	-0.199154
80.42	52.2141	27.9801	12.3697	2.91034	-0.193663
80.52	52.0117	27.8636	12.3416	2.90411	-0.201478
80.6199	51.7555	27.7511	12.3094	2.89154	-0.202331
80.7199	51.5664	27.6254	12.2712	2.89471	-0.203065
80.82	51.3625	27.5121	12.2267	2.89081	-0.203795
80.92	51.1344	27.4144	12.2009	2.8963	-0.204647
81.02	50.9375	27.3285	12.1766	2.89154	-0.196842
81.1199	50.7305	27.2191	12.1517	2.8924	-0.191346
81.2199	50.5172	27.1137	12.1274	2.87286	-0.193657
81.32	50.3531	27.0238	12.1196	2.88141	-0.183527
81.42	50.1523	26.9308	12.1095	2.88531	-0.185119
81.52	49.9547	26.834	12.0728	2.90253	-0.181214
81.6199	49.7672	26.7308	12.0619	2.8963	-0.170228
81.7199	49.5953	26.6449	12.0298	2.89313	-0.170228
81.82	49.3821	26.5605	12.0072	2.89008	-0.17572
81.92	49.1781	26.4894	11.979	2.87982	-0.164001
82.02	48.9938	26.3926	11.9673	2.87286	-0.164002
82.1199	48.804	26.3011	11.9337	2.86969	-0.153874
82.2199	48.6235	26.2214	11.8907	2.86505	-0.163994
82.32	48.4664	26.1566	11.8892	2.86188	-0.150689
82.42	48.3063	26.0964	11.8728	2.8775	-0.142148
82.52	48.1438	26.0231	11.8478	2.87445	-0.124942
82.6199	47.9531	25.9285	11.7947	2.86969	-0.135073
82.7199	47.7672	25.8535	11.7681	2.86505	-0.132748
82.82	47.5938	25.7784	11.7485	2.87201	-0.135922
82.92	47.4352	25.7191	11.7329	2.87677	-0.12726
83.02	47.2727	25.6332	11.6908	2.86346	-0.135069
83.1199	47.1055	25.5644	11.6681	2.883	-0.122621
83.2199	46.9524	25.5121	11.629	2.87054	-0.115539
83.32	46.7758	25.4418	11.6095	2.86969	-0.132751
83.42	46.6266	25.3621	11.5806	2.86188	-0.124939
83.52	46.4664	25.2972	11.5525	2.86346	-0.134338
83.6199	46.318	25.2363	11.5298	2.86578	-0.121029
83.7199	46.1633	25.1683	11.5095	2.86273	-0.115545
83.82	45.9938	25.0808	11.4868	2.85956	-0.135064
83.92	45.8359	25.0277	11.4705	2.85175	-0.124934
84.02	45.6836	24.9707	11.4556	2.85016	-0.114812
84.1199	45.5774	24.9183	11.4532	2.86505	-0.105409
84.2199	45.4008	24.8488	11.436	2.85797	-0.104674
84.32	45.1656	24.7738	11.4197	2.84003	-0.099916
84.42	45.0618	24.7106	11.3868	2.83221	-0.107726
84.52	44.9586	24.6589	11.3892	2.84393	-0.105409
84.6199	44.8164	24.6238	11.3845	2.84393	-0.0991774
84.7199	44.6774	24.584	11.3696	2.84161	-0.093689
84.82	44.5	24.5222	11.3478	2.84003	-0.103814
84.92	44.3977	24.4824	11.3533	2.84003	-0.0913649
85.02	44.2578	24.4324	11.3384	2.84235	-0.0741625
85.1199	44.2125	24.3949	11.3282	2.84003	-0.0842824
85.2199	44.1031	24.3621	11.3243	2.84552	-0.0741601
85.32	43.9703	24.291	11.3188	2.85016	-0.0757494
85.42	43.8414	24.2332	11.3009	2.84003	-0.0835571
85.52	43.7422	24.1934	11.2892	2.83221	-0.0803833
85.6199	43.6602	24.1433	11.2853	2.83221	-0.0741577
85.7199	43.5446	24.084	11.2712	2.82281	-0.0796461
85.82	43.4211	24.0418	11.2681	2.84003	-0.0741506
85.92	43.293	24.0043	11.2595	2.83221	-0.0608535
86.02	43.1829	23.9613	11.2439	2.8299	-0.0686631
86.1199	43.0719	23.9121	11.2056	2.81427	-0.0858765
86.2199	42.9492	23.8621	11.1978	2.80878	-0.0952768
86.32	42.8203	23.809	11.1876	2.80951	-0.0874672
86.42	42.7125	23.7527	11.172	2.80487	-0.101501
86.52	42.6055	23.7074	11.1587	2.79315	-0.111633
86.6199	42.4977	23.6738	11.1619	2.80487	-0.101497
86.7199	42.3922	23.6199	11.1564	2.80255	-0.10309
86.82	42.2789	23.5723	11.1368	2.80096	-0.107733
86.92	42.1711	23.5277	11.1072	2.78925	-0.135064
87.02	42.0625	23.491	11.1079	2.79474	-0.124946
87.1199	41.9703	23.4574	11.1001	2.78925	-0.12262
87.2199	41.8649	23.4238	11.0916	2.79156	-0.122615
87.32	41.8024	23.3777	11.0884	2.80096	-0.124932
87.42	41.7422	23.3542	11.0978	2.80096	-0.11322
87.52	41.6656	23.3223	11.0743	2.80328	-0.119446
87.6199	41.593	23.2855	11.0587	2.80487	-0.124934
87.7199	41.5273	23.2488	11.0486	2.78925	-0.134331
87.82	41.4313	23.2129	11.0376	2.80096	-0.113219
87.92	41.3024	23.1925	11.0438	2.79547	-0.121028
88.02	41.2086	23.1715	11.0306	2.78302	-0.115544
88.1199	41.0914	23.1097	11.0181	2.77362	-0.136651
88.2199	40.9938	23.073	11.0134	2.77362	-0.130428
88.32	40.9086	23.048	11.0024	2.77203	-0.12653
88.42	40.8743	23.0137	10.979	2.75568	-0.13897
88.52	40.7852	22.9831	10.9806	2.76581	-0.132759
88.6199	40.7047	22.9652	10.9689	2.7619	-0.134338
88.7199	40.6344	22.9551	10.9509	2.75018	-0.132751
88.82	40.5977	22.9324	10.9376	2.74469	-0.144472
88.92	40.5344	22.9121	10.9181	2.74005	-0.145201
89.02	40.4329	22.8715	10.9181	2.73615	-0.144472
89.1199	40.3211	22.8409	10.8986	2.72906	-0.155462
89.2199	40.2375	22.8043	10.8907	2.71503	-0.154596
89.32	40.1461	22.7917	10.8892	2.73456	-0.149963
89.42	40.0641	22.7754	10.8923	2.72284	-0.152279
89.52	40	22.7589	10.8853	2.71893	-0.156193
89.6199	39.9446	22.7363	10.8712	2.72284	-0.154609
89.7199	39.8469	22.7113	10.8392	2.71039	-0.164001
89.82	39.7617	22.6918	10.8368	2.71185	-0.165587
89.92	39.693	22.6628	10.84	2.72284	-0.171815
90.02	39.6344	22.6324	10.8197	2.7088	-0.184264
90.1199	39.6016	22.6199	10.8173	2.70404	-0.185119
90.2199	39.5625	22.5808	10.8087	2.70331	-0.181215
90.32	39.4915	22.5699	10.7885	2.69476	-0.185858
90.42	39.4235	22.5418	10.7681	2.66815	-0.203057
90.52	39.375	22.5215	10.7775	2.67206	-0.201484
90.6199	39.3235	22.5027	10.7524	2.66266	-0.206971
90.7199	39.2406	22.4698	10.7501	2.66425	-0.214051
90.82	39.1946	22.4528	10.7267	2.66034	-0.217102
90.92	39.15	22.4246	10.729	2.66656	-0.224186
91.02	39.0766	22.4027	10.7048	2.66425	-0.242123
91.1199	39.0204	22.3793	10.7072	2.66193	-0.23432
91.2199	38.9508	22.3418	10.6876	2.6424	-0.240532
91.32	38.9117	22.3308	10.6814	2.65094	-0.234307
91.42	38.875	22.3145	10.6899	2.66656	-0.222595
91.52	38.8438	22.2917	10.6798	2.66425	-0.228088
91.6199	38.8063	22.2738	10.6821	2.66583	-0.221003
91.7199	38.7649	22.2793	10.6908	2.66974	-0.205389
91.82	38.7047	22.241	10.6759	2.64081	-0.22417
91.92	38.6852	22.2426	10.6782	2.65094	-0.19366
92.02	38.6188	22.2285	10.6892	2.66425	-0.187444
92.1199	38.5898	22.2097	10.6954	2.67206	-0.185112
92.2199	38.554	22.2051	10.6899	2.68378	-0.164002
92.32	38.5101	22.1808	10.6915	2.67438	-0.171813
92.42	38.4641	22.1628	10.6876	2.67206	-0.175722
92.52	38.4	22.1324	10.6876	2.66425	-0.175719
92.6199	38.3531	22.1097	10.6814	2.65411	-0.171809
92.7199	38.3086	22.0824	10.686	2.66425	-0.173395
92.82	38.2906	22.0792	10.686	2.67047	-0.164007
92.92	38.2516	22.0621	10.672	2.66193	-0.174134
93.02	38.2047	22.0417	10.6681	2.65094	-0.1734
93.1199	38.1813	22.0316	10.6603	2.66425	-0.164001
93.2199	38.1289	22.0105	10.6486	2.66266	-0.156183
93.32	38.0914	21.9902	10.6486	2.67523	-0.154601
93.42	38.054	21.9753	10.6541	2.67206	-0.164001
93.52	38.0133	21.9551	10.6509	2.65723	-0.164001
93.6199	37.9977	21.9473	10.658	2.66742	-0.166327
93.7199	37.9235	21.9222	10.6384	2.62909	-0.185113
93.82	37.9063	21.9191	10.6353	2.63373	-0.165587
93.92	37.8633	21.9105	10.6196	2.63458	-0.171807
94.02	37.8258	21.9043	10.629	2.633	-0.171821
94.1199	37.8016	21.8793	10.6088	2.633	-0.172547
94.2199	37.7695	21.8691	10.6079	2.62286	-0.179627
94.32	37.7281	21.8488	10.604	2.61578	-0.186703
94.42	37.693	21.8425	10.5978	2.61578	-0.171814
94.52	37.6719	21.834	10.5923	2.61346	-0.181946
94.6199	37.6305	21.8184	10.597	2.60101	-0.175719
94.7199	37.5813	21.7918	10.5978	2.60956	-0.163994
94.82	37.543	21.7949	10.6001	2.60175	-0.163997
94.92	37.5032	21.78	10.6095	2.60016	-0.161683
95.02	37.4672	21.7699	10.5962	2.58844	-0.164001
95.1199	37.3961	21.741	10.572	2.57831	-0.163994
95.2199	37.386	21.7449	10.5806	2.58612	-0.160092
95.32	37.3375	21.734	10.5876	2.5799	-0.164001
95.42	37.2992	21.7316	10.5767	2.56891	-0.152287
95.52	37.2454	21.7051	10.5525	2.54547	-0.161678
95.6199	37.2242	21.6996	10.5493	2.56427	-0.15227
95.7199	37.2125	21.7035	10.5603	2.5838	-0.129579
95.82	37.1852	21.6934	10.5493	2.5705	-0.136659
95.92	37.1477	21.6683	10.5486	2.5705	-0.136652
96.02	37.1211	21.6699	10.5486	2.58221	-0.124945
96.1199	37.0992	21.6355	10.5337	2.58063	-0.124203
96.2199	37.0758	21.6238	10.5337	2.56427	-0.119442
96.32	37.0602	21.6097	10.5251	2.57208	-0.115539
96.42	37.0469	21.6019	10.5181	2.58685	-0.12421
96.52	37.0149	21.5707	10.5017	2.5611	-0.121029
96.6199	37.0094	21.5433	10.4978	2.5838	-0.133478
96.7199	36.9915	21.5332	10.4985	2.58612	-0.117127
96.82	36.9594	21.5206	10.4868	2.59784	-0.126531
96.92	36.9235	21.5035	10.4681	2.56036	-0.135069
97.02	36.8938	21.4832	10.4712	2.55878	-0.142152
97.1199	36.8695	21.4691	10.4751	2.56732	-0.134344
97.2199	36.8329	21.4496	10.4587	2.53461	-0.142882
97.32	36.8125	21.4363	10.4431	2.54315	-0.140561
97.42	36.8	21.4293	10.4431	2.54865	-0.146795
97.52	36.761	21.4066	10.4282	2.54156	-0.156183
97.6199	36.7367	21.3878	10.4243	2.54938	-0.165585
97.7199	36.7125	21.3848	10.4126	2.54474	-0.170228
97.82	36.6711	21.3715	10.408	2.54083	-0.166322
97.92	36.6461	21.348	10.4001	2.54156	-0.167901
98.02	36.6211	21.3418	10.4064	2.55487	-0.164009
98.1199	36.5813	21.3308	10.4009	2.57281	-0.173402
98.2199	36.5375	21.3097	10.397	2.57281	-0.1773
98.32	36.5204	21.3121	10.39	2.57367	-0.174139
98.42	36.4805	21.2816	10.3751	2.57281	-0.183526
98.52	36.4648	21.266	10.3813	2.5838	-0.181953
98.6199	36.4313	21.2605	10.3774	2.5611	-0.185119
98.7199	36.4039	21.2332	10.3611	2.5611	-0.181215
98.82	36.3805	21.2223	10.365	2.54242	-0.174132
98.92	36.343	21.2136	10.3501	2.54547	-0.181215
99.02	36.3102	21.209	10.347	2.54083	-0.180357
99.1199	36.2789	21.1801	10.3446	2.53766	-0.18903
99.2199	36.2524	21.1589	10.3282	2.52362	-0.203058
99.32	36.2313	21.1699	10.3282	2.52289	-0.203066
99.42	36.2172	21.1472	10.3282	2.52594	-0.206967
99.52	36.1946	21.1371	10.3282	2.53143	-0.203067
99.6199	36.1719	21.1332	10.311	2.52362	-0.203065
99.7199	36.1415	21.1097	10.3064	2.5119	-0.217101
99.82	36.1211	21.1035	10.3025	2.52362	-0.214784
99.92	36.082	21.1003	10.2899	2.52203	-0.221862
100.02	36.0742	21.0847	10.2892	2.5119	-0.210877
100.12	36.0634	21.0699	10.2869	2.50958	-0.224913
100.22	36.0313	21.0707	10.2712	2.5119	-0.222596
100.32	36.0016	21.0519	10.2704	2.49237	-0.230407
100.42	35.9727	21.0433	10.2603	2.49237	-0.234314
100.52	35.9641	21.0277	10.2634	2.49237	-0.243713
100.62	35.9531	21.0238	10.2697	2.49237	-0.230409
100.72	35.9235	21.0043	10.2501	2.48224	-0.232728
100.82	35.9016	20.9941	10.24	2.46893	-0.234314
100.92	35.8828	20.9808	10.229	2.46112	-0.234307
101.02	35.8766	20.9714	10.2306	2.46112	-0.234321
101.12	35.8602	20.9606	10.2181	2.4588	-0.244452
101.22	35.8203	20.9519	10.2095	2.44781	-0.25384
101.32	35.8079	20.9512	10.2072	2.43927	-0.257745
101.42	35.7875	20.9464	10.1978	2.45013	-0.247623
101.52	35.7617	20.9418	10.1993	2.43927	-0.260067
101.62	35.7548	20.9355	10.1892	2.44159	-0.244452
101.72	35.7242	20.9222	10.1704	2.44159	-0.263246
101.82	35.7015	20.9113	10.1603	2.43219	-0.255431
101.92	35.6813	20.9043	10.1603	2.42365	-0.261652
102.02	35.661	20.9027	10.1603	2.43146	-0.263983
102.12	35.6406	20.891	10.1486	2.41815	-0.265564
102.22	35.6204	20.8809	10.1384	2.41034	-0.274957
102.32	35.5883	20.88	10.147	2.40875	-0.263248
102.42	35.568	20.8652	10.1313	2.39313	-0.281189
102.52	35.5547	20.8597	10.1329	2.39703	-0.287415
102.62	35.5399	20.848	10.1267	2.39789	-0.275694
102.72	35.5195	20.8402	10.1173	2.38531	-0.285096
102.82	35.4844	20.8214	10.0978	2.3736	-0.294494
102.92	35.4703	20.8145	10.0884	2.37518	-0.292909
103.02	35.4329	20.8011	10.0876	2.36273	-0.304625
103.12	35.4313	20.8027	10.072	2.35956	-0.30072
103.22	35.4023	20.7918	10.0688	2.35406	-0.312432
103.32	35.386	20.7933	10.0704	2.36505	-0.299133
103.42	35.361	20.7637	10.061	2.36346	-0.302304
103.52	35.3375	20.7559	10.0681	2.35724	-0.287418
103.62	35.2985	20.7293	10.0486	2.34235	-0.304626
103.72	35.2805	20.7191	10.0376	2.34003	-0.304619
103.82	35.2617	20.7129	10.0509	2.35333	-0.304627
103.92	35.2383	20.7003	10.0392	2.35016	-0.30463
104.02	35.1969	20.6941	10.022	2.34625	-0.302303
104.12	35.2008	20.6816	10.0275	2.35175	-0.285095
104.22	35.1735	20.6683	10.0079	2.34235	-0.292901
104.32	35.1617	20.6628	10.0134	2.35724	-0.292908
104.42	35.1266	20.6527	10.0103	2.35175	-0.292908
104.52	35.111	20.6348	10.0001	2.34784	-0.30072
104.62	35.1016	20.6316	10.0079	2.35797	-0.304626
104.72	35.0914	20.6215	9.99072	2.3338	-0.304619
104.82	35.0735	20.6152	10.0017	2.34393	-0.292908
104.92	35.043	20.6019	10.0001	2.33221	-0.292908
105.02	35.0344	20.5785	9.9884	2.32281	-0.304626
105.12	35.0234	20.5707	9.98291	2.33771	-0.292908
105.22	35.0039	20.5511	9.98059	2.33453	-0.30072
105.32	34.9875	20.5339	9.97437	2.33612	-0.300715
105.42	34.9703	20.5316	9.97119	2.32599	-0.292908
105.52	34.9414	20.5144	9.96887	2.33453	-0.304626
105.62	34.9368	20.5176	9.97437	2.34625	-0.290585
105.72	34.9196	20.5176	9.96887	2.35101	-0.283514
105.82	34.8899	20.4769	9.95874	2.34003	-0.30304
105.92	34.8672	20.4597	9.94543	2.33063	-0.296807
106.02	34.861	20.4629	9.94775	2.34552	-0.292915
106.12	34.832	20.4496	9.93762	2.34003	-0.304622
106.22	34.8196	20.4402	9.9259	2.34235	-0.296815
106.32	34.7852	20.4363	9.90479	2.33844	-0.306209
106.42	34.7766	20.4238	9.89465	2.34711	-0.310849
106.52	34.7601	20.4089	9.89856	2.35248	-0.315616
106.62	34.7454	20.3832	9.87903	2.34393	-0.312434
106.72	34.7188	20.3731	9.87903	2.35175	-0.310845
106.82	34.7164	20.3715	9.88135	2.35333	-0.292908
106.92	34.7125	20.3597	9.88062	2.35406	-0.304628
107.02	34.6813	20.3324	9.86499	2.34943	-0.306944
107.12	34.6438	20.3106	9.84778	2.34235	-0.321831
107.22	34.6328	20.309	9.8501	2.36346	-0.300715
107.32	34.6188	20.2996	9.84778	2.36346	-0.304626
107.42	34.6008	20.2917	9.84937	2.36505	-0.304626
107.52	34.568	20.2933	9.83606	2.35956	-0.310852
107.62	34.5508	20.2949	9.83838	2.36346	-0.302302
107.72	34.5422	20.2894	9.84778	2.35956	-0.285095
107.82	34.5313	20.2777	9.83765	2.36188	-0.292908
107.92	34.511	20.2605	9.82434	2.36346	-0.292901
108.02	34.5	20.2621	9.83838	2.36346	-0.291328
108.12	34.4711	20.241	9.82898	2.36346	-0.298405
108.22	34.4446	20.2152	9.82202	2.35406	-0.312439
108.32	34.4258	20.2051	9.80872	2.35565	-0.31012
108.42	34.4055	20.184	9.8009	2.34393	-0.300717
108.52	34.3899	20.1777	9.797	2.33148	-0.30463
108.62	34.3594	20.1511	9.77747	2.32831	-0.304619
108.72	34.3516	20.141	9.78137	2.3205	-0.30072
108.82	34.3352	20.1215	9.77124	2.32281	-0.312439
108.92	34.3102	20.1035	9.76025	2.3205	-0.310847
109.02	34.2906	20.1003	9.76575	2.3205	-0.304631
109.12	34.2813	20.0902	9.75952	2.32281	-0.316339
109.22	34.2782	20.0918	9.76343	2.34161	-0.306952
109.32	34.25	20.0785	9.73682	2.3338	-0.325737
109.42	34.2415	20.0707	9.7384	2.33221	-0.31244
109.52	34.2094	20.0402	9.7251	2.33063	-0.325744
109.62	34.193	20.0348	9.72278	2.32208	-0.33038
109.72	34.1891	20.0261	9.72668	2.32672	-0.325748
109.82	34.1523	20.0027	9.71887	2.315	-0.343682
109.92	34.1438	20.0082	9.71106	2.32599	-0.330383
110.02	34.1211	20.0137	9.70166	2.33221	-0.33197
110.12	34.0985	20.0082	9.70483	2.31818	-0.338194
110.22	34.0898	20.0004	9.70093	2.3111	-0.333553
110.32	34.0664	19.9894	9.70166	2.31891	-0.325748
110.42	34.0305	19.9824	9.68994	2.30096	-0.342102
110.52	34.0024	19.9714	9.68762	2.29474	-0.335876
110.62	34.0227	19.9746	9.6814	2.31268	-0.333559
110.72	34.0094	19.9613	9.67749	2.29706	-0.334295
110.82	33.9915	19.9418	9.64465	2.28302	-0.343682
110.92	33.9805	19.934	9.64856	2.28143	-0.342098
111.02	33.9703	19.9222	9.64539	2.28217	-0.329655
111.12	33.9531	19.9011	9.64075	2.28534	-0.341364
111.22	33.9524	19.9004	9.63843	2.28302	-0.322572
111.32	33.9102	19.8809	9.61731	2.26349	-0.335877
111.42	33.9	19.8582	9.6095	2.25641	-0.34296
111.52	33.8633	19.8308	9.58606	2.23297	-0.339779
111.62	33.8547	19.8207	9.58057	2.23456	-0.349916
111.72	33.8219	19.8011	9.56812	2.22052	-0.346007
111.82	33.8024	19.7949	9.56104	2.20563	-0.351501
111.92	33.775	19.7699	9.56262	2.21661	-0.351497
112.02	33.761	19.7582	9.5603	2.21893	-0.353093
112.12	33.736	19.7386	9.54468	2.21112	-0.357726
112.22	33.7242	19.7426	9.53528	2.21271	-0.363221
112.32	33.7094	19.7175	9.52588	2.20013	-0.374943
112.42	33.6946	19.6856	9.51025	2.20331	-0.374934
112.52	33.6719	19.6879	9.50952	2.2049	-0.374944
112.62	33.6633	19.6824	9.51965	2.21344	-0.37262
112.72	33.6406	19.6722	9.51025	2.22284	-0.363213
112.82	33.6438	19.666	9.51184	2.22443	-0.359314
112.92	33.6211	19.655	9.50171	2.22516	-0.359315
113.02	33.6031	19.6324	9.50012	2.22052	-0.361632
113.12	33.5813	19.6199	9.4884	2.21112	-0.374939
113.22	33.5508	19.6121	9.46887	2.20172	-0.373346
113.32	33.543	19.6121	9.46887	2.21503	-0.368712
113.42	33.5211	19.584	9.46729	2.21112	-0.374939
113.52	33.4836	19.573	9.45715	2.20331	-0.37262
113.62	33.4586	19.5605	9.44934	2.19159	-0.365538
113.72	33.4531	19.5512	9.45093	2.19159	-0.374934
113.82	33.4407	19.5433	9.44543	2.17987	-0.374933
113.92	33.418	19.5496	9.44617	2.19159	-0.364811
114.02	33.3961	19.5316	9.42981	2.19391	-0.382748
114.12	33.3782	19.5176	9.42908	2.18927	-0.374938
114.22	33.3594	19.4965	9.41809	2.18536	-0.371026
114.32	33.3352	19.4926	9.42041	2.19159	-0.357723
114.42	33.3304	19.4894	9.4165	2.20013	-0.356998
114.52	33.3219	19.4746	9.39856	2.18378	-0.371029
114.62	33.2938	19.4707	9.40015	2.18146	-0.361639
114.72	33.2734	19.4441	9.3728	2.17438	-0.382747
114.82	33.2617	19.4418	9.37512	2.18536	-0.374933
114.92	33.243	19.4316	9.37903	2.18927	-0.365546
115.02	33.2094	19.4105	9.35791	2.17279	-0.388238
115.12	33.1907	19.3988	9.34778	2.17365	-0.386651
115.22	33.1914	19.391	9.33997	2.18378	-0.380426
115.32	33.1844	19.3809	9.33997	2.1955	-0.361634
115.42	33.1602	19.3676	9.34155	2.19159	-0.37494
115.52	33.1523	19.3488	9.33447	2.17828	-0.382751
115.62	33.1328	19.3441	9.31104	2.16583	-0.382746
115.72	33.1219	19.3317	9.3103	2.16974	-0.385072
115.82	33.1016	19.3168	9.28918	2.16034	-0.384338
115.92	33.0797	19.3113	9.27905	2.16034	-0.382744
116.02	33.0735	19.3011	9.27747	2.16034	-0.382759
116.12	33.0492	19.2816	9.26807	2.15326	-0.38433
116.22	33.0461	19.2816	9.26965	2.17596	-0.371034
116.32	33.0211	19.2621	9.25012	2.16193	-0.379571
116.42	33.0094	19.2699	9.25012	2.16583	-0.374939
116.52	32.986	19.2527	9.2384	2.16034	-0.386658
116.62	32.9727	19.2426	9.22046	2.16266	-0.392145
116.72	32.9735	19.2418	9.21655	2.16193	-0.373358
116.82	32.9531	19.2191	9.19543	2.14081	-0.394466
116.92	32.9375	19.2198	9.19385	2.14703	-0.388248
117.02	32.9016	19.2051	9.17822	2.1236	-0.402279
117.12	32.8945	19.1996	9.19153	2.13849	-0.402279
117.22	32.8798	19.1879	9.19702	2.13849	-0.395208
117.32	32.8477	19.1683	9.16809	2.10956	-0.39605
117.42	32.8438	19.1605	9.16809	2.1236	-0.382748
117.52	32.8281	19.1488	9.1626	2.12128	-0.388248
117.62	32.804	19.1371	9.15015	2.12128	-0.394464
117.72	32.7789	19.1215	9.14624	2.11896	-0.394476
117.82	32.7516	19.1097	9.12512	2.10175	-0.402278
117.92	32.7297	19.098	9.1134	2.10956	-0.394463
118.02	32.7188	19.0918	9.11963	2.10956	-0.394477
118.12	32.6891	19.0808	9.11731	2.10175	-0.394463
118.22	32.6852	19.0824	9.1095	2.10406	-0.388973
118.32	32.6696	19.0691	9.104	2.10797	-0.38825
118.42	32.6383	19.0316	9.08765	2.09943	-0.404601
118.52	32.6133	19.0238	9.08057	2.09393	-0.414003
118.62	32.5914	19.0059	9.08215	2.0838	-0.42181
118.72	32.5719	18.9988	9.07666	2.09625	-0.413273
118.82	32.5313	18.9691	9.06262	2.08453	-0.42022
118.92	32.5344	18.9636	9.06262	2.09393	-0.413998
119.02	32.5289	18.959	9.05798	2.09943	-0.408512
119.12	32.4977	18.9301	9.04541	2.08221	-0.423394
119.22	32.4836	18.9238	9.03296	2.08221	-0.413994
119.32	32.4727	18.9222	9.0376	2.08612	-0.410095
119.42	32.4531	18.8933	9.01343	2.08612	-0.408505
119.52	32.4501	18.8887	9.02515	2.0799	-0.408512
119.62	32.4219	18.8597	8.99622	2.07208	-0.423401
119.72	32.4016	18.8418	8.9845	2.06659	-0.425714
119.82	32.3867	18.8386	8.9751	2.06891	-0.415587
119.92	32.3711	18.8207	8.96887	2.07281	-0.431946
120.02	32.361	18.7917	8.95947	2.0705	-0.437439
120.12	32.329	18.7793	8.94702	2.05804	-0.44525
120.22	32.3125	18.7621	8.93762	2.05096	-0.433534
120.32	32.2969	18.7511	8.92981	2.03766	-0.444518
120.42	32.2727	18.7441	8.9259	2.03143	-0.439751
120.52	32.2594	18.7425	8.92981	2.03143	-0.43354
120.62	32.25	18.7214	8.9259	2.05096	-0.431206
120.72	32.2594	18.7246	8.93762	2.04156	-0.410097
120.82	32.2321	18.709	8.91577	2.04865	-0.424132
120.92	32.2258	18.6918	8.92041	2.05096	-0.431941
121.02	32.2203	18.6824	8.91809	2.05096	-0.423406
121.12	32.1992	18.6722	8.89856	2.03925	-0.413995
121.22	32.2008	18.6527	8.89697	2.04706	-0.415587
121.32	32.1891	18.641	8.89075	2.03375	-0.420227
121.42	32.1696	18.6316	8.87903	2.03375	-0.423402
121.52	32.1383	18.6191	8.87048	2.03851	-0.416319
121.62	32.1305	18.6019	8.86731	2.02594	-0.421814
121.72	32.111	18.5918	8.84778	2.03534	-0.433528
121.82	32.0992	18.5886	8.84387	2.03302	-0.423402
121.92	32.068	18.5769	8.83447	2.02985	-0.421811
122.02	32.0625	18.5629	8.83057	2.02594	-0.421817
122.12	32.0422	18.541	8.83765	2.03302	-0.435853
122.22	32.011	18.5199	8.82825	2.01971	-0.445244
122.32	32.0117	18.5144	8.82202	2.02362	-0.442926
122.42	31.9993	18.5137	8.82434	2.0213	-0.431947
122.52	31.9805	18.4902	8.79858	2.0213	-0.433532
122.62	31.9602	18.4769	8.79541	2.01971	-0.445245
122.72	31.957	18.4675	8.80713	2.01813	-0.433537
122.82	31.9196	18.4558	8.78918	2.01031	-0.433533
122.92	31.8945	18.434	8.78137	1.99628	-0.439026
123.02	31.8743	18.4238	8.76184	1.98456	-0.441345
123.12	31.8711	18.4183	8.74854	1.99396	-0.433527
123.22	31.8586	18.4199	8.76111	2.00958	-0.431952
123.32	31.8102	18.4011	8.74622	1.99469	-0.441345
123.42	31.7727	18.391	8.7384	1.99237	-0.439754
123.52	31.7555	18.3793	8.7345	1.98065	-0.437444
123.62	31.7383	18.3754	8.729	1.99237	-0.43512
123.72	31.7086	18.3715	8.7384	1.98224	-0.433533
123.82	31.6836	18.3519	8.71887	1.98846	-0.433526
123.92	31.6735	18.3418	8.71887	1.98297	-0.433529
124.02	31.6617	18.3347	8.71887	1.9986	-0.425724
124.12	31.6305	18.3113	8.69934	1.99237	-0.433527
124.22	31.611	18.3223	8.69934	1.98224	-0.433534
124.32	31.593	18.3012	8.69934	1.98297	-0.425713
124.42	31.5797	18.3035	8.69934	1.98615	-0.421815
124.52	31.5492	18.28	8.68762	1.99078	-0.432799
124.62	31.5133	18.2559	8.66809	1.97284	-0.429623
124.72	31.4875	18.248	8.66809	1.97052	-0.434271
124.82	31.4508	18.2214	8.64856	1.95331	-0.437433
124.92	31.4305	18.2207	8.64624	1.97833	-0.435859
125.02	31.4086	18.1996	8.61572	1.95953	-0.446832
125.12	31.3883	18.1879	8.60791	1.9494	-0.454644
125.22	31.3821	18.1824	8.62122	1.96112	-0.43976
125.32	31.3492	18.1582	8.60876	1.95099	-0.435851
125.42	31.3297	18.141	8.6095	1.94391	-0.445248
125.52	31.3086	18.1215	8.59619	1.96112	-0.43903
125.62	31.2711	18.1003	8.58057	1.9494	-0.450739
125.72	31.2516	18.0996	8.57983	1.95099	-0.44367
125.82	31.2336	18.073	8.5509	1.93219	-0.453064
125.92	31.2086	18.0512	8.54077	1.93378	-0.460873
126.02	31.1898	18.0378	8.53369	1.94	-0.466373
126.12	31.1711	18.0114	8.51733	1.93146	-0.485052
126.22	31.1321	17.9887	8.48682	1.90253	-0.496027
126.32	31.1172	17.9792	8.50012	1.90094	-0.485905
126.42	31.0938	17.9558	8.48059	1.89471	-0.501527
126.52	31.0634	17.9449	8.46655	1.88617	-0.494444
126.62	31.0391	17.9207	8.44775	1.88141	-0.503838
126.72	31.0211	17.934	8.45093	1.89081	-0.492126
126.82	30.9915	17.9121	8.44543	1.89081	-0.502255
126.92	30.9664	17.9043	8.44543	1.88849	-0.496038
127.02	30.9469	17.8777	8.43372	1.87128	-0.496027
127.12	30.9398	17.8777	8.42664	1.89703	-0.497623
127.22	30.9133	17.8535	8.41028	1.89081	-0.50152
127.32	30.9	17.8519	8.40173	1.8924	-0.488958
127.42	30.8805	17.8324	8.38135	1.883	-0.503845
127.52	30.8547	17.8152	8.37903	1.87128	-0.515564
127.62	30.8359	17.8207	8.3595	1.87982	-0.517155
127.72	30.8008	17.8051	8.33606	1.883	-0.532776
127.82	30.7828	17.8012	8.33057	1.87286	-0.531183
127.92	30.7626	17.7933	8.31812	1.86115	-0.533509
128.02	30.7383	17.7832	8.297	1.85956	-0.54132
128.12	30.7281	17.7777	8.29077	1.85956	-0.544487
128.22	30.6914	17.7722	8.2876	1.85016	-0.542909
128.32	30.6797	17.7644	8.2876	1.84235	-0.554626
128.42	30.6516	17.7699	8.25952	1.83221	-0.554619
128.52	30.6422	17.766	8.27197	1.84393	-0.554634
128.62	30.6227	17.7598	8.25793	1.85333	-0.562438
128.72	30.593	17.7527	8.25171	1.85565	-0.562439
128.82	30.582	17.7559	8.2384	1.83612	-0.567935
128.92	30.5618	17.741	8.21497	1.81268	-0.572576
129.02	30.5313	17.723	8.18994	1.80487	-0.574153
129.12	30.5087	17.6989	8.1853	1.79083	-0.588194
129.22	30.5	17.6902	8.1814	1.77362	-0.591366
129.32	30.4961	17.7003	8.17664	1.76031	-0.574162
129.42	30.4531	17.6855	8.16028	1.74005	-0.585878
129.52	30.4407	17.6777	8.14783	1.72052	-0.593688
129.62	30.4133	17.6628	8.13684	1.71112	-0.580383
129.72	30.3906	17.6543	8.11963	1.69391	-0.583557
129.82	30.3743	17.6433	8.11731	1.70331	-0.58197
129.92	30.3516	17.6231	8.1001	1.69318	-0.581965
130.02	30.3375	17.6199	8.11108	1.67987	-0.585881
130.12	30.3102	17.6082	8.09229	1.6806	-0.593686
130.22	30.293	17.5957	8.08997	1.68146	-0.58197
130.32	30.2727	17.5847	8.08057	1.65253	-0.593686
130.42	30.2649	17.5684	8.08923	1.66034	-0.585882
130.52	30.2266	17.5496	8.06653	1.65643	-0.597589
130.62	30.2227	17.5644	8.06653	1.66974	-0.593689
130.72	30.2024	17.5511	8.05872	1.64313	-0.603088
130.82	30.1914	17.5339	8.047	1.65253	-0.593682
130.92	30.193	17.5316	8.04932	1.65411	-0.589784
131.02	30.1735	17.5121	8.04932	1.65326	-0.603087
131.12	30.1328	17.4949	8.03137	1.66034	-0.609309
131.22	30.1227	17.4926	8.03137	1.66193	-0.607727
131.32	30.1047	17.4746	8.02124	1.65485	-0.61322
131.42	30.082	17.4636	8.02197	1.65021	-0.624932
131.52	30.0719	17.4652	8.03137	1.63141	-0.610908
131.62	30.0625	17.4535	8.03137	1.62909	-0.601501
131.72	30.054	17.4316	8.01965	1.633	-0.611626
131.82	30.0352	17.4222	8.02124	1.62909	-0.593689
131.92	30.0149	17.4128	8.01965	1.59784	-0.591366
132.02	30.0094	17.4082	8.01575	1.61505	-0.584293
132.12	29.9703	17.3816	8.01575	1.60565	-0.605401
132.22	29.9641	17.3848	8.01965	1.6236	-0.599915
132.32	29.9414	17.3793	8.01025	1.61737	-0.593689
132.42	29.9329	17.3621	8.01184	1.6369	-0.591365
132.52	29.9156	17.3597	8.00793	1.64313	-0.585881
132.62	29.8883	17.3512	8.0072	1.67133	-0.574896
132.72	29.8594	17.3308	7.99622	1.67047	-0.575738
132.82	29.8398	17.3308	7.99463	1.68219	-0.56403
132.92	29.8157	17.3066	7.98059	1.67596	-0.581965
133.02	29.7985	17.2972	7.97668	1.66974	-0.571843
133.12	29.7852	17.2917	7.98291	1.66425	-0.55072
133.22	29.7633	17.2933	7.98059	1.65253	-0.549129
133.32	29.7532	17.2918	7.98059	1.66034	-0.535089
133.42	29.7375	17.2832	7.97986	1.66193	-0.525702
133.52	29.6914	17.252	7.95715	1.64081	-0.535089
133.62	29.668	17.2371	7.94385	1.63922	-0.5484
133.72	29.6399	17.2191	7.93762	1.64081	-0.546807
133.82	29.6305	17.2136	7.93762	1.65253	-0.535095
133.92	29.5992	17.1918	7.93213	1.64081	-0.540581
134.02	29.5938	17.1855	7.93372	1.64703	-0.519477
134.12	29.5719	17.1722	7.922	1.64471	-0.531184
134.22	29.5422	17.1628	7.91809	1.6463	-0.531182
134.32	29.5289	17.1644	7.91028	1.65253	-0.51947
134.42	29.5039	17.1332	7.90247	1.64471	-0.531184
134.52	29.4922	17.123	7.90015	1.64081	-0.521794
134.62	29.4821	17.1097	7.89856	1.64313	-0.513245
134.72	29.4641	17.0925	7.88684	1.62677	-0.529599
134.82	29.4391	17.0879	7.88684	1.63849	-0.517889
134.92	29.4196	17.0606	7.86731	1.60956	-0.535088
135.02	29.3922	17.059	7.8595	1.62128	-0.535102
135.12	29.3704	17.0472	7.85718	1.61737	-0.527283
135.22	29.3594	17.03	7.84387	1.61737	-0.527276
135.32	29.3492	17.0199	7.84619	1.62128	-0.524963
135.42	29.3313	17.0027	7.84778	1.60956	-0.523365
135.52	29.3258	17.0004	7.8501	1.63141	-0.503857
135.62	29.307	16.9808	7.84619	1.63922	-0.517155
135.72	29.2828	16.9636	7.82202	1.633	-0.521782
135.82	29.2656	16.9668	7.83215	1.63849	-0.511654
135.92	29.2509	16.959	7.82825	1.63849	-0.50617
136.02	29.2203	16.9324	7.80872	1.62909	-0.513239
136.12	29.2008	16.9222	7.80249	1.633	-0.50384
136.22	29.1914	16.9121	7.797	1.63141	-0.496033
136.32	29.1696	16.9011	7.77588	1.62909	-0.503838
136.42	29.1617	16.9027	7.79077	1.633	-0.492123
136.52	29.1383	16.8855	7.7915	1.6275	-0.497623
136.62	29.111	16.8652	7.77979	1.62518	-0.492119
136.72	29.1055	16.866	7.78369	1.62518	-0.480408
136.82	29.0953	16.8582	7.77356	1.62677	-0.492122
136.92	29.0735	16.8519	7.76965	1.6236	-0.481996
137.02	29.0461	16.8317	7.76111	1.63068	-0.474913
137.12	29.0234	16.8207	7.75012	1.62128	-0.480408
137.22	29.0016	16.8035	7.74072	1.61346	-0.478816
137.32	28.9797	16.7894	7.7384	1.6236	-0.476501
137.42	28.9609	16.7699	7.73218	1.62286	-0.484308
137.52	28.9485	16.7613	7.73608	1.63068	-0.47492
137.62	28.9102	16.741	7.70947	1.62128	-0.496029
137.72	28.8984	16.7371	7.71338	1.6181	-0.489804
137.82	28.8743	16.7246	7.71265	1.633	-0.492126
137.92	28.8492	16.7136	7.69934	1.633	-0.492119
138.02	28.8242	16.723	7.70166	1.63849	-0.492134
138.12	28.8118	16.7113	7.69934	1.64081	-0.484315
138.22	28.7985	16.6894	7.68689	1.64081	-0.494452
138.32	28.7594	16.6628	7.6759	1.64081	-0.515557
138.42	28.7336	16.6644	7.67822	1.64471	-0.515559
138.52	28.7109	16.6504	7.6759	1.64081	-0.515569
138.62	28.6875	16.6355	7.66882	1.64081	-0.517148
138.72	28.675	16.6238	7.66028	1.64081	-0.523376
138.82	28.6523	16.6152	7.65405	1.633	-0.531189
138.92	28.6227	16.6137	7.64856	1.633	-0.531184
139.02	28.6016	16.598	7.64856	1.62909	-0.5351
139.12	28.579	16.5762	7.63684	1.6369	-0.535094
139.22	28.568	16.573	7.64075	1.62128	-0.531189
139.32	28.543	16.5629	7.62122	1.62128	-0.542903
139.42	28.5305	16.5511	7.60718	1.62128	-0.533508
139.52	28.5172	16.5293	7.60559	1.62286	-0.535095
139.62	28.4984	16.5378	7.59619	1.62592	-0.536686
139.72	28.4625	16.5027	7.58057	1.60565	-0.542908
[truncated: 7,208 more rows]

## Sheet: 3C
Time (s)	250	125	62.5	31.25
-60.06*	0.660461*	0.431396*	0.370789*	0.280579*		excluded data*
-59.96*	0.648743*	0.419678*	0.35907*	0.257141*
-59.86*	0.652649*	0.431396*	0.370789*	0.276672*
-59.76*	0.640935*	0.419678*	0.351262*	0.264954*
-59.66*	0.648743*	0.419678*	0.35907*	0.261047*
-59.56*	0.648743*	0.419678*	0.35907*	0.261047*
-59.46*	0.648743*	0.419678*	0.35907*	0.261047*
-59.36*	0.637024*	0.415771*	0.35907*	0.261047*
-59.26*	0.629211*	0.407959*	0.35907*	0.253235*
-59.16*	0.625305*	0.407959*	0.347351*	0.264954*
-59.06*	0.625305*	0.407959*	0.335632*	0.253235*
-58.96*	0.617493*	0.407959*	0.347351*	0.253235*
-58.86*	0.617493*	0.39624*	0.347351*	0.253235*
-58.76*	0.617486*	0.39624*	0.347344*	0.245422*
-58.66*	0.605774*	0.376709*	0.335632*	0.221985*
-58.56*	0.594055*	0.388428*	0.335632*	0.221985*
-58.46*	0.605774*	0.400146*	0.335632*	0.241516*
-58.36*	0.605774*	0.400146*	0.32782*	0.225891*
-58.26*	0.597961*	0.388428*	0.32782*	0.225891*
-58.16*	0.597961*	0.388428*	0.32782*	0.225891*
-58.06*	0.597961*	0.380615*	0.32782*	0.214172*
-57.96*	0.590149*	0.380615*	0.32782*	0.214172*
-57.86*	0.586243*	0.380615*	0.32782*	0.210266*
-57.76*	0.59405*	0.376709*	0.34344*	0.218079*
-57.66*	0.586243*	0.368896*	0.32782*	0.202454*
-57.56*	0.586243*	0.361084*	0.32782*	0.202454*
-57.46*	0.590149*	0.353271*	0.308289*	0.202454*
-57.36*	0.566711*	0.329834*	0.284851*	0.190735*
-57.26*	0.566711*	0.329834*	0.308289*	0.182922*
-57.16*	0.586243*	0.337646*	0.308289*	0.182922*
-57.06*	0.586243*	0.337646*	0.308289*	0.182922*
-56.96*	0.597961*	0.337646*	0.29657*	0.171204*
-56.86*	0.597961*	0.329834*	0.288757*	0.163391*
-56.76*	0.597966*	0.337646*	0.288762*	0.155579*
-56.66*	0.605774*	0.345459*	0.288757*	0.163391*
-56.56*	0.597961*	0.349365*	0.288757*	0.155579*
-56.46*	0.617493*	0.357178*	0.304382*	0.151672*
-56.36*	0.617493*	0.368896*	0.316101*	0.151672*
-56.26*	0.617488*	0.368896*	0.316096*	0.159485*
-56.16*	0.597961*	0.372803*	0.320007*	0.163391*
-56.06*	0.597961*	0.368896*	0.316101*	0.151672*
-55.96*	0.597961*	0.357178*	0.316101*	0.163391*
-55.86*	0.57843*	0.361084*	0.29657*	0.151672*
-55.76*	0.590142*	0.361084*	0.296563*	0.163391*
-55.66*	0.594055*	0.357178*	0.29657*	0.151672*
-55.56*	0.586243*	0.357178*	0.288757*	0.163391*
-55.46*	0.57843*	0.368896*	0.277039*	0.14386*
-55.36*	0.569031*	0.388428*	0.292664*	0.151672*
-55.26*	0.580016*	0.34314*	0.277038*	0.14386*
-55.16*	0.584656*	0.355591*	0.275452*	0.14386*
-55.06*	0.57843*	0.353271*	0.282532*	0.14386*
-54.96*	0.576111*	0.357178*	0.263*	0.129822*
-54.86*	0.558899*	0.350159*	0.26532*	0.151672*
-54.76*	0.547171*	0.345459*	0.265311*	0.151672*
-54.66*	0.55188*	0.347046*	0.27002*	0.172791*
-54.56*	0.5495*	0.351685*	0.256714*	0.177429*
-54.46*	0.555786*	0.346252*	0.246582*	0.176697*
-54.36*	0.554199*	0.336853*	0.237183*	0.182129*
-54.26*	0.548749*	0.334534*	0.242658*	0.17981*
-54.16*	0.534668*	0.325134*	0.244995*	0.178223*
-54.06*	0.531555*	0.318115*	0.223145*	0.191528*
-53.96*	0.519836*	0.303284*	0.213745*	0.182129*
-53.86*	0.515137*	0.296997*	0.206726*	0.173523*
-53.76*	0.504988*	0.286865*	0.213728*	0.156372*
-53.66*	0.504211*	0.283752*	0.215332*	0.171997*
-53.56*	0.479187*	0.254822*	0.194214*	0.150879*
-53.46*	0.458923*	0.247803*	0.184082*	0.140747*
-53.36*	0.444824*	0.23999*	0.179382*	0.119629*
-53.26*	0.429966*	0.205627*	0.171544*	0.104797*
-53.16*	0.421387*	0.187622*	0.162964*	0.0766602*
-53.06*	0.418274*	0.17749*	0.167664*	0.0766602*
-52.96*	0.415161*	0.179077*	0.164551*	0.0634155*
-52.86*	0.410461*	0.191528*	0.16687*	0.0852661*
-52.76*	0.401845*	0.185303*	0.160635*	0.0805664*
-52.66*	0.378418*	0.185303*	0.146545*	0.0766602*
-52.56*	0.380005*	0.17749*	0.141113*	0.0665283*
-52.46*	0.387024*	0.18219*	0.131714*	0.0618286*
-52.36*	0.388611*	0.174377*	0.11145*	0.0587158*
-52.26*	0.389341*	0.172791*	0.123899*	0.0649414*
-52.16*	0.391724*	0.174377*	0.128601*	0.0782471*
-52.06*	0.383911*	0.17749*	0.128601*	0.0735474*
-51.96*	0.387024*	0.18219*	0.133301*	0.0735474*
-51.86*	0.401062*	0.21106*	0.155151*	0.0852661*
-51.76*	0.39643*	0.21814*	0.148139*	0.0782471*
-51.66*	0.401855*	0.243103*	0.170776*	0.0914917*
-51.56*	0.415161*	0.24469*	0.177063*	0.0821533*
-51.46*	0.425293*	0.27124*	0.191101*	0.0727539*
-51.36*	0.461243*	0.314209*	0.245789*	0.100891*
-51.26*	0.478461*	0.334534*	0.257514*	0.102478*
-51.16*	0.483887*	0.345459*	0.26062*	0.119629*
-51.06*	0.44873*	0.372009*	0.27002*	0.124329*
-50.96*	0.406555*	0.397034*	0.273132*	0.139954*
-50.86*	0.403442*	0.424377*	0.273132*	0.164978*
-50.76*	0.410461*	0.443909*	0.254395*	0.186829*
-50.66*	0.39563*	0.426697*	0.244995*	0.178223*
-50.56*	0.38623*	0.439209*	0.250488*	0.199341*
-50.46*	0.35498*	0.414978*	0.244995*	0.194641*
-50.36*	0.343262*	0.364197*	0.241089*	0.209473*
-50.26*	0.29798*	0.27594*	0.220038*	0.207153*
-50.16*	0.26825*	0.266541*	0.213745*	0.212585*
-50.06*	0.242493*	0.24231*	0.205933*	0.207153*
-49.96*	0.199524*	0.21344*	0.172363*	0.214172*
-49.86*	0.200317*	0.193909*	0.163757*	0.199341*
-49.76*	0.231567*	0.176697*	0.14032*	0.189941*
-49.66*	0.322205*	0.162659*	0.128601*	0.182922*
-49.56*	0.446411*	0.185303*	0.191101*	0.190735*
-49.46*	0.510437*	0.223572*	0.309082*	0.20166*
-49.36*	0.469849*	0.197021*	0.304382*	0.14386*
-49.26*	0.410454*	0.135315*	0.222344*	0.0454102*
-49.16*	0.422974*	0.142334*	0.210632*	0.0477905*
-49.06*	0.437012*	0.169678*	0.213745*	0.0961914*
-48.96*	0.440918*	0.228271*	0.230957*	0.11261*
-48.86*	0.457336*	0.228271*	0.237976*	0.132141*
-48.76*	0.429995*	0.220459*	0.230165*	0.124329*
-48.66*	0.421387*	0.223572*	0.220764*	0.119629*
-48.56*	0.399536*	0.204834*	0.183289*	0.101685*
-48.46*	0.362793*	0.190002*	0.148132*	0.0961914*
-48.36*	0.32843*	0.203247*	0.127808*	0.0844727*
-48.26*	0.281586*	0.159546*	0.110688*	0.0313721*
-48.16*	0.290161*	0.181396*	0.132507*	0.0196533*
-48.06*	0.336243*	-0.0513916*	-0.0330811*	0.101685*
-47.96*	0.371399*	-0.722473*	-0.631531*	0.234497*
-47.86*	0.375305*	-0.324036*	-0.499512*	0.132141*
-47.76*	0.387303*	0.640747*	0.351537*	0.0532227*
-47.66*	0.42218*	0.397827*	0.366882*	0.202454*
-47.56*	0.342529*	0.335327*	0.219238*	0.0837402*
-47.46*	0.329224*	0.144714*	0.13562*	0.0305786*
-47.36*	0.464355*	0.187683*	0.297363*	0.161072*
-47.26*	0.557288*	0.261902*	0.326209*	0.236877*
-47.16*	0.555786*	0.245422*	0.312988*	0.230591*
-47.06*	0.527649*	0.243103*	0.285645*	0.202454*
-46.96*	0.527649*	0.247803*	0.272339*	0.214966*
-46.86*	0.534668*	0.227478*	0.256714*	0.208679*
-46.76*	0.543228*	0.205627*	0.234818*	0.200134*
-46.66*	0.544067*	0.161865*	0.19812*	0.209473*
-46.56*	0.514343*	0.141541*	0.159058*	0.198547*
-46.46*	0.476074*	0.101685*	0.13562*	0.174316*
-46.36*	0.430786*	0.0884399*	0.112976*	0.124329*
-46.26*	0.445625*	0.139221*	0.129402*	0.14386*
-46.16*	0.450317*	0.173584*	0.139526*	0.155579*
-46.06*	0.465942*	0.210327*	0.181763*	0.14856*
-45.96*	0.459656*	0.215759*	0.202026*	0.153992*
-45.86*	0.454224*	0.243103*	0.221558*	0.14856*
-45.76*	0.467469*	0.267334*	0.253602*	0.158691*
-45.66*	0.454224*	0.268127*	0.262207*	0.140747*
-45.56*	0.444824*	0.243103*	0.252808*	0.13916*
-45.46*	0.447205*	0.247803*	0.235657*	0.136841*
-45.36*	0.449524*	0.24469*	0.241882*	0.14386*
-45.26*	0.432311*	0.230591*	0.220763*	0.131348*
-45.16*	0.413574*	0.20874*	0.210632*	0.11261*
-45.06*	0.419067*	0.21344*	0.209839*	0.123535*
-44.96*	0.418274*	0.223572*	0.214539*	0.125122*
-44.86*	0.415161*	0.229858*	0.227844*	0.153259*
-44.76*	0.389346*	0.218872*	0.213748*	0.13446*
-44.66*	0.391724*	0.225159*	0.223145*	0.140747*
-44.56*	0.367493*	0.200928*	0.191101*	0.10791*
-44.46*	0.351868*	0.201721*	0.170776*	0.110291*
-44.36*	0.367493*	0.207153*	0.175476*	0.122742*
-44.26*	0.351081*	0.201721*	0.170784*	0.120422*
-44.16*	0.363586*	0.216553*	0.180176*	0.132141*
-44.06*	0.372986*	0.236084*	0.199707*	0.144653*
-43.96*	0.387024*	0.240784*	0.206726*	0.156372*
-43.86*	0.398743*	0.238403*	0.194214*	0.158691*
-43.76*	0.390135*	0.240784*	0.195005*	0.159485*
-43.66*	0.365173*	0.225952*	0.191895*	0.141541*
-43.56*	0.374512*	0.232178*	0.187195*	0.13916*
-43.46*	0.372192*	0.226685*	0.195007*	0.146973*
-43.36*	0.370605*	0.232971*	0.198914*	0.156372*
-43.26*	0.364374*	0.236877*	0.210627*	0.152466*
-43.16*	0.340149*	0.219666*	0.194214*	0.131348*
-43.06*	0.320618*	0.204041*	0.179382*	0.124329*
-42.96*	0.308899*	0.205627*	0.188782*	0.121216*
-42.86*	0.284668*	0.189209*	0.174683*	0.100098*
-42.76*	0.274538*	0.184509*	0.171572*	0.11261*
-42.66*	0.287781*	0.185303*	0.162964*	0.122742*
-42.56*	0.26593*	0.17749*	0.151245*	0.100891*
-42.46*	0.27063*	0.17749*	0.155945*	0.11731*
-42.36*	0.286255*	0.189209*	0.157532*	0.129028*
-42.26*	0.26825*	0.172791*	0.143433*	0.119629*
-42.16*	0.262024*	0.166565*	0.136414*	0.123535*
-42.06*	0.262817*	0.179077*	0.133301*	0.133728*
-41.96*	0.251099*	0.164978*	0.120789*	0.124329*
-41.86*	0.253418*	0.162659*	0.120789*	0.11261*
-41.76*	0.258113*	0.160278*	0.107479*	0.100098*
-41.66*	0.262817*	0.15094*	0.0981445*	0.0930786*
-41.56*	0.284668*	0.172791*	0.10907*	0.0930786*
-41.46*	0.282349*	0.174377*	0.118469*	0.102478*
-41.36*	0.277649*	0.157959*	0.107483*	0.0922852*
-41.26*	0.277654*	0.15094*	0.0973563*	0.0805664*
-41.16*	0.269836*	0.158752*	0.102844*	0.0704346*
-41.06*	0.266724*	0.145447*	0.0817261*	0.0704346*
-40.96*	0.272949*	0.153259*	0.0957642*	0.0719604*
-40.86*	0.26593*	0.157959*	0.0973511*	0.0813599*
-40.76*	0.270643*	0.15094*	0.0950451*	0.0782471*
-40.66*	0.295593*	0.169678*	0.119202*	0.0930786*
-40.56*	0.29718*	0.172791*	0.121582*	0.104797*
-40.46*	0.29718*	0.174377*	0.116882*	0.0930786*
-40.36*	0.290161*	0.169678*	0.10907*	0.0883789*
-40.26*	0.289372*	0.161072*	0.112187*	0.0899658*
-40.16*	0.288574*	0.165771*	0.112976*	0.0930786*
-40.06*	0.30188*	0.167358*	0.121582*	0.0899658*
-39.96*	0.300293*	0.172791*	0.116882*	0.0883789*
-39.86*	0.29718*	0.17749*	0.116882*	0.0930786*
-39.76*	0.301081*	0.173584*	0.112971*	0.0922852*
-39.66*	0.29248*	0.168091*	0.10437*	0.0883789*
-39.56*	0.279236*	0.147827*	0.0825195*	0.071228*
-39.46*	0.269836*	0.150146*	0.0817261*	0.0852661*
-39.36*	0.272949*	0.150146*	0.0778198*	0.0766602*
-39.26*	0.277644*	0.150146*	0.0848341*	0.0860596*
-39.16*	0.274536*	0.133728*	0.074707*	0.0821533*
-39.06*	0.277649*	0.143127*	0.0778198*	0.0852661*
-38.96*	0.284668*	0.161865*	0.0848389*	0.0922852*
-38.86*	0.308899*	0.174377*	0.10907*	0.109497*
-38.76*	0.301877*	0.181396*	0.10986*	0.132141*
-38.66*	0.304199*	0.17981*	0.0973511*	0.131348*
-38.56*	0.294067*	0.179077*	0.105957*	0.121216*
-38.46*	0.30188*	0.189209*	0.10907*	0.119629*
-38.36*	0.311218*	0.188416*	0.111389*	0.131348*
-38.26*	0.304991*	0.172791*	0.12158*	0.120422*
-38.16*	0.30188*	0.174377*	0.116882*	0.0977783*
-38.06*	0.284668*	0.169678*	0.123901*	0.104797*
-37.96*	0.29718*	0.172791*	0.119995*	0.111023*
-37.86*	0.29718*	0.166565*	0.118469*	0.114197*
-37.76*	0.301884*	0.153259*	0.112187*	0.11261*
-37.66*	0.2995*	0.153259*	0.128601*	0.116516*
-37.56*	0.29718*	0.170471*	0.139526*	0.124329*
-37.46*	0.294861*	0.174377*	0.134094*	0.132141*
-37.36*	0.312805*	0.184509*	0.159851*	0.152466*
-37.26*	0.304197*	0.189209*	0.151243*	0.16571*
-37.16*	0.304199*	0.181396*	0.159851*	0.160278*
-37.06*	0.29718*	0.17749*	0.144226*	0.151672*
-36.96*	0.29718*	0.17749*	0.152832*	0.158691*
-36.86*	0.29248*	0.169678*	0.143433*	0.158691*
-36.76*	0.290156*	0.184509*	0.143428*	0.156372*
-36.66*	0.281555*	0.169678*	0.133301*	0.155579*
-36.56*	0.279236*	0.179077*	0.148132*	0.160278*
-36.46*	0.284668*	0.17981*	0.143433*	0.153992*
-36.36*	0.279968*	0.17749*	0.143433*	0.151672*
-36.26*	0.265928*	0.169678*	0.129393*	0.151672*
-36.16*	0.259705*	0.166565*	0.125488*	0.14856*
-36.06*	0.260437*	0.160278*	0.116089*	0.143066*
-35.96*	0.246399*	0.15094*	0.0942383*	0.129028*
-35.86*	0.243286*	0.150146*	0.0895386*	0.127441*
-35.76*	0.255002*	0.166565*	0.101254*	0.14856*
-35.66*	0.250305*	0.150146*	0.0942383*	0.140747*
-35.56*	0.256531*	0.150146*	0.0996704*	0.142273*
-35.46*	0.258118*	0.14856*	0.0856323*	0.151672*
-35.36*	0.251099*	0.135315*	0.0825195*	0.14856*
-35.26*	0.254219*	0.131409*	0.0887523*	0.156372*
-35.16*	0.27063*	0.145447*	0.102051*	0.17041*
-35.06*	0.279968*	0.150146*	0.10907*	0.182129*
-34.96*	0.278442*	0.149353*	0.119995*	0.187622*
-34.86*	0.285461*	0.158752*	0.116882*	0.186035*
-34.76*	0.301878*	0.169678*	0.113768*	0.210266*
-34.66*	0.289368*	0.157959*	0.10907*	0.211853*
-34.56*	0.281555*	0.150146*	0.10437*	0.20166*
-34.46*	0.272949*	0.143127*	0.0856323*	0.199341*
-34.36*	0.255005*	0.142334*	0.0794067*	0.191528*
-34.26*	0.246392*	0.133728*	0.0848317*	0.185242*
-34.16*	0.244812*	0.118896*	0.0567017*	0.178223*
-34.06*	0.24408*	0.122009*	0.0708008*	0.171204*
-33.96*	0.253418*	0.11969*	0.0809326*	0.168091*
-33.86*	0.262024*	0.129822*	0.0864258*	0.174316*
-33.76*	0.263615*	0.12439*	0.0825238*	0.180603*
-33.66*	0.277649*	0.138428*	0.0825195*	0.197754*
-33.56*	0.272949*	0.138428*	0.0926514*	0.199341*
-33.46*	0.289368*	0.145447*	0.0965576*	0.20166*
-33.36*	0.277649*	0.135315*	0.0942383*	0.197754*
-33.26*	0.277646*	0.147034*	0.0973482*	0.200134*
-33.16*	0.282349*	0.145447*	0.0973511*	0.194641*
-33.06*	0.282349*	0.138428*	0.090332*	0.187622*
-32.96*	0.304199*	0.15094*	0.119995*	0.217285*
-32.86*	0.29718*	0.150146*	0.121582*	0.221985*
-32.76*	0.297177*	0.141541*	0.128598*	0.218872*
-32.66*	0.289368*	0.138428*	0.128601*	0.209473*
-32.56*	0.280762*	0.129822*	0.128601*	0.205566*
-32.46*	0.285461*	0.143127*	0.131714*	0.214172*
-32.36*	0.277649*	0.138428*	0.136414*	0.214172*
-32.26*	0.267519*	0.140015*	0.133303*	0.204041*
-32.16*	0.272949*	0.145447*	0.128601*	0.194641*
-32.06*	0.294067*	0.161865*	0.128601*	0.209473*
-31.96*	0.29248*	0.157959*	0.136414*	0.205566*
-31.86*	0.29718*	0.161072*	0.14032*	0.207153*
-31.76*	0.304204*	0.169678*	0.143437*	0.214172*
-31.66*	0.309692*	0.165771*	0.155945*	0.214172*
-31.56*	0.313599*	0.162659*	0.157532*	0.204041*
-31.46*	0.301086*	0.166565*	0.159851*	0.213379*
-31.36*	0.313599*	0.181396*	0.162964*	0.214172*
-31.26*	0.320618*	0.181396*	0.179382*	0.225891*
-31.16*	0.315918*	0.184509*	0.184082*	0.218872*
-31.06*	0.316711*	0.193909*	0.190308*	0.225891*
-30.96*	0.308899*	0.196228*	0.182495*	0.212585*
-30.86*	0.308899*	0.192322*	0.187195*	0.214172*
-30.76*	0.308911*	0.201721*	0.180188*	0.214172*
-30.66*	0.320618*	0.220459*	0.206726*	0.221985*
-30.56*	0.295593*	0.204041*	0.202026*	0.209473*
-30.46*	0.29718*	0.21344*	0.206726*	0.202454*
-30.36*	0.304993*	0.219666*	0.214539*	0.207153*
-30.26*	0.297979*	0.221252*	0.219244*	0.214172*
-30.16*	0.313599*	0.228271*	0.234863*	0.199341*
-30.06*	0.304199*	0.225159*	0.225464*	0.194641*
-29.96*	0.321411*	0.231384*	0.237976*	0.194641*
-29.86*	0.32843*	0.24469*	0.242676*	0.209473*
-29.76*	0.328435*	0.251709*	0.2497*	0.202454*
-29.66*	0.33313*	0.250916*	0.248901*	0.210266*
-29.56*	0.32843*	0.255615*	0.245789*	0.207153*
-29.46*	0.340149*	0.260315*	0.257507*	0.214172*
-29.36*	0.327637*	0.254822*	0.245789*	0.20166*
-29.26*	0.320622*	0.264221*	0.2497*	0.197754*
-29.16*	0.316711*	0.267334*	0.257507*	0.210266*
-29.06*	0.32373*	0.27124*	0.26062*	0.214966*
-28.96*	0.321411*	0.267334*	0.262207*	0.218872*
-28.86*	0.331543*	0.274353*	0.277039*	0.229004*
-28.76*	0.325315*	0.268921*	0.273923*	0.218872*
-28.66*	0.313599*	0.27124*	0.269226*	0.21106*
-28.56*	0.32843*	0.27124*	0.273926*	0.225891*
-28.46*	0.320618*	0.259521*	0.269226*	0.214172*
-28.36*	0.32373*	0.259521*	0.284058*	0.225891*
-28.26*	0.328435*	0.254822*	0.277043*	0.218079*
-28.16*	0.32843*	0.267334*	0.277039*	0.225891*
-28.06*	0.32373*	0.279053*	0.284058*	0.221191*
-27.96*	0.304993*	0.267334*	0.27002*	0.214172*
-27.86*	0.304993*	0.259521*	0.277039*	0.20636*
-27.76*	0.308899*	0.27124*	0.280945*	0.20636*
-27.66*	0.313599*	0.259521*	0.269226*	0.20636*
-27.56*	0.320618*	0.262634*	0.269226*	0.197754*
-27.46*	0.313599*	0.264221*	0.266113*	0.207153*
-27.36*	0.308899*	0.247803*	0.261414*	0.202454*
-27.26*	0.31281*	0.251709*	0.261418*	0.20636*
-27.16*	0.320618*	0.247803*	0.272339*	0.214172*
-27.06*	0.304199*	0.231384*	0.26062*	0.209473*
-26.96*	0.29718*	0.221252*	0.245789*	0.190735*
-26.86*	0.289368*	0.223572*	0.250488*	0.182922*
-26.76*	0.289375*	0.204834*	0.245796*	0.182922*
-26.66*	0.289368*	0.221252*	0.249695*	0.194641*
-26.56*	0.289368*	0.20874*	0.249695*	0.194641*
-26.46*	0.300293*	0.20874*	0.257507*	0.202454*
-26.36*	0.294067*	0.217346*	0.266113*	0.199341*
-26.26*	0.289368*	0.200928*	0.249695*	0.194641*
-26.16*	0.277649*	0.189209*	0.249695*	0.186829*
-26.06*	0.285461*	0.193909*	0.249695*	0.187622*
-25.96*	0.289368*	0.200928*	0.261414*	0.20636*
-25.86*	0.294067*	0.193115*	0.249695*	0.20636*
-25.76*	0.31281*	0.207947*	0.261418*	0.210266*
-25.66*	0.308899*	0.20874*	0.261414*	0.218079*
-25.56*	0.301086*	0.205627*	0.261414*	0.20636*
-25.46*	0.301086*	0.193115*	0.249695*	0.20636*
-25.36*	0.301086*	0.181396*	0.249695*	0.20166*
-25.26*	0.284671*	0.176697*	0.244998*	0.182922*
-25.16*	0.289368*	0.181396*	0.237976*	0.189941*
-25.06*	0.281555*	0.176697*	0.225464*	0.17981*
-24.96*	0.281555*	0.161865*	0.218445*	0.186829*
-24.86*	0.274536*	0.154846*	0.220032*	0.17511*
-24.76*	0.269841*	0.157166*	0.210637*	0.17511*
-24.66*	0.277649*	0.14624*	0.210632*	0.17981*
-24.56*	0.269836*	0.138428*	0.210632*	0.182129*
-24.46*	0.281555*	0.147034*	0.222351*	0.17511*
-24.36*	0.281555*	0.130615*	0.222351*	0.17511*
-24.26*	0.281555*	0.130615*	0.222351*	0.17511*
-24.16*	0.276855*	0.122803*	0.222351*	0.167297*
-24.06*	0.258118*	0.122803*	0.217651*	0.167297*
-23.96*	0.250305*	0.118103*	0.195801*	0.167297*
-23.86*	0.262817*	0.118896*	0.198914*	0.17511*
-23.76*	0.262026*	0.111084*	0.191103*	0.155579*
-23.66*	0.253418*	0.0993652*	0.194214*	0.155579*
-23.56*	0.26593*	0.107178*	0.194214*	0.158691*
-23.46*	0.26593*	0.111877*	0.191895*	0.156372*
-23.36*	0.26593*	0.106384*	0.194214*	0.163391*
-23.26*	0.274536*	0.111084*	0.184082*	0.163391*
-23.16*	0.269836*	0.111084*	0.179382*	0.163391*
-23.06*	0.262024*	0.0993652*	0.179382*	0.150879*
-22.96*	0.276855*	0.103271*	0.186401*	0.152466*
-22.86*	0.278442*	0.103271*	0.168457*	0.147766*
-22.76*	0.257324*	0.0915527*	0.152039*	0.147766*
-22.66*	0.250305*	0.0884399*	0.152039*	0.147766*
-22.56*	0.250305*	0.0837402*	0.147339*	0.136047*
-22.46*	0.255005*	0.0751343*	0.148132*	0.14386*
-22.36*	0.245605*	0.0603027*	0.14502*	0.14386*
-22.26*	0.250305*	0.0720215*	0.152039*	0.147766*
-22.16*	0.23938*	0.0720215*	0.147339*	0.147766*
-22.06*	0.23468*	0.0603027*	0.14032*	0.136047*
-21.96*	0.226074*	0.0681152*	0.136414*	0.14386*
-21.86*	0.222168*	0.071228*	0.139526*	0.13916*
-21.76*	0.210449*	0.0759277*	0.144226*	0.132141*
-21.66*	0.195618*	0.0759277*	0.141113*	0.132141*
-21.56*	0.212036*	0.0845337*	0.14032*	0.14856*
-21.46*	0.204224*	0.0915527*	0.14032*	0.147766*
-21.36*	0.202637*	0.0946655*	0.143433*	0.150879*
-21.26*	0.21204*	0.104065*	0.136418*	0.14856*
-21.16*	0.206543*	0.0946655*	0.133301*	0.155579*
-21.06*	0.187805*	0.0876465*	0.128601*	0.14386*
-20.96*	0.190918*	0.0907593*	0.131714*	0.13916*
-20.86*	0.192505*	0.095459*	0.123901*	0.13916*
-20.76*	0.192509*	0.0970459*	0.121586*	0.133728*
-20.66*	0.199524*	0.0993652*	0.125488*	0.124329*
-20.56*	0.204224*	0.0993652*	0.11377*	0.124329*
-20.46*	0.211243*	0.0962524*	0.116089*	0.116516*
-20.36*	0.214355*	0.0946655*	0.112183*	0.116516*
-20.26*	0.214355*	0.0946655*	0.11377*	0.116516*
-20.16*	0.207336*	0.079834*	0.10907*	0.116516*
-20.06*	0.204224*	0.0728149*	0.10907*	0.109497*
-19.96*	0.206543*	0.0829468*	0.112183*	0.114929*
-19.86*	0.207336*	0.095459*	0.11377*	0.120422*
-19.76*	0.207339*	0.0837402*	0.0926542*	0.109497*
-19.66*	0.212036*	0.0853271*	0.090332*	0.0930786*
-19.56*	0.226074*	0.086853*	0.10907*	0.104797*
-19.46*	0.204224*	0.079834*	0.10907*	0.100098*
-19.36*	0.202637*	0.079834*	0.112183*	0.0961914*
-19.26*	0.210456*	0.0829468*	0.108284*	0.0977783*
-19.16*	0.215149*	0.0876465*	0.112976*	0.100098*
-19.06*	0.20813*	0.0806274*	0.10675*	0.0977783*
-18.96*	0.215942*	0.0915527*	0.120789*	0.116516*
-18.86*	0.214355*	0.0899658*	0.119202*	0.10791*
-18.76*	0.202635*	0.0759277*	0.102049*	0.0977783*
-18.66*	0.192505*	0.0610962*	0.0825195*	0.0899658*
-18.56*	0.199524*	0.0681152*	0.0817261*	0.0852661*
-18.46*	0.187805*	0.0681152*	0.0731201*	0.0852661*
-18.36*	0.190918*	0.0759277*	0.0887451*	0.0836792*
-18.26*	0.192505*	0.0681152*	0.0856323*	0.0860596*
-18.16*	0.179199*	0.0563965*	0.0739136*	0.0813599*
-18.06*	0.200317*	0.0681152*	0.090332*	0.109497*
-17.96*	0.199524*	0.0603027*	0.0973511*	0.104797*
-17.86*	0.192505*	0.0681152*	0.0973511*	0.10791*
-17.76*	0.199529*	0.079834*	0.0973558*	0.11261*
-17.66*	0.199524*	0.0728149*	0.105164*	0.109497*
-17.56*	0.187805*	0.0681152*	0.105164*	0.100098*
-17.46*	0.183105*	0.0751343*	0.100464*	0.0836792*
-17.36*	0.171387*	0.0634155*	0.0934448*	0.0665283*
-17.26*	0.164378*	0.0532837*	0.0934548*	0.0540161*
-17.16*	0.172974*	0.0650024*	0.10675*	0.0540161*
-17.06*	0.172974*	0.0673218*	0.120789*	0.0540161*
-16.96*	0.183105*	0.0728149*	0.116882*	0.0618286*
-16.86*	0.168274*	0.0751343*	0.116882*	0.0587158*
-16.76*	0.175289*	0.0634155*	0.116085*	0.0524292*
-16.66*	0.156555*	0.0532837*	0.10437*	0.0469971*
-16.56*	0.148743*	0.048584*	0.090332*	0.0422974*
-16.46*	0.14563*	0.032959*	0.0942383*	0.0422974*
-16.36*	0.137024*	0.0337524*	0.0973511*	0.0422974*
-16.26*	0.145635*	0.0524902*	0.101262*	0.0587158*
-16.16*	0.132324*	0.0634155*	0.0973511*	0.0618286*
-16.06*	0.117493*	0.0532837*	0.0973511*	0.0618286*
-15.96*	0.133911*	0.0524902*	0.10907*	0.0657349*
-15.86*	0.119812*	0.0477905*	0.0965576*	0.0610352*
-15.76*	0.105781*	0.0407715*	0.077827*	0.0540161*
-15.66*	0.0979614*	0.0407715*	0.0926514*	0.0657349*
-15.56*	0.105774*	0.048584*	0.0934448*	0.0688477*
-15.46*	0.0948486*	0.0454712*	0.0825195*	0.0587158*
-15.36*	0.0831299*	0.032959*	0.0708008*	0.0422974*
-15.26*	0.0854449*	0.0282593*	0.0848346*	0.0493164*
-15.16*	0.0784302*	0.0212402*	0.0700073*	0.0344849*
-15.06*	0.0753174*	0.0181274*	0.067688*	0.0391846*
-14.96*	0.0510864*	0.0134277*	0.0700073*	0.0274658*
-14.86*	0.0463867*	-0.00299*	0.0574951*	0.0297852*
-14.76*	0.0424805*	0.00482*	0.0535889*	0.0266724*
-14.66*	0.0393677*	-0.0022*	0.0465698*	0.0266724*
-14.56*	0.0229492*	-0.0069*	0.0387573*	0.0250854*
-14.46*	0.0206299*	-0.00452*	0.043457*	0.0157471*
-14.36*	0.00812*	0.00171*	0.0418701*	0.0274658*
-14.26*	0.0128193*	0.00482*	0.0387592*	0.0227661*
-14.16*	0.0112305*	0.000916*	0.0465698*	0.0258789*
-14.06*	-0.000488*	-0.0061*	0.0348511*	0.0157471*
-13.96*	0.00891*	-0.00922*	0.0348511*	0.0110474*
-13.86*	0.0128174*	-0.00531*	0.0387573*	0.0196533*
-13.76*	0.00343*	-0.0100098*	0.0270457*	0.0180664*
-13.66*	0.00812*	0.00171*	0.043457*	0.0266724*
-13.56*	0.0128174*	-0.00299*	0.0426636*	0.0266724*
-13.46*	0.0151367*	-0.00299*	0.0379639*	0.0266724*
-13.36*	0.0128174*	-0.00922*	0.0301514*	0.0227661*
-13.26*	0.0167279*	-0.00531*	0.0317426*	0.0196533*
-13.16*	0.0120239*	0.00482*	0.043457*	0.0188599*
-13.06*	0.00732*	-0.0022*	0.0340576*	0.00244*
-12.96*	0.00342*	-0.0022*	0.0270386*	0.00323*
-12.86*	-0.0036*	-0.0022*	0.0317383*	-0.00146*
-12.76*	0.0128222*	0.0142212*	0.0387621*	0.00793*
-12.66*	0.00812*	0.0204468*	0.0418701*	0.0227661*
-12.56*	0.00812*	0.0142212*	0.043457*	0.0110474*
-12.46*	0.0112305*	0.024353*	0.0418701*	0.0180664*
-12.36*	0.0206299*	0.0267334*	0.0481567*	0.0274658*
-12.26*	0.0159273*	0.0290527*	0.0418672*	0.0157471*
-12.16*	0.00342*	0.0196533*	0.0418701*	0.0180664*
-12.06*	0.00812*	0.0290527*	0.0317383*	0.0149536*
-11.96*	0.0011*	0.017334*	0.0387573*	0.0149536*
-11.86*	0.0151367*	0.0212402*	0.0262451*	0.0149536*
-11.76*	0.00812*	0.017334*	0.0301514*	0.0258789*
-11.66*	0.00812*	0.00873*	0.0231323*	0.0227661*
-11.56*	0.005*	0.0150146*	0.00519*	0.00793*
-11.46*	0.00342*	0.0212402*	0.0114136*	0.0196533*
-11.36*	0.00812*	0.00952*	-0.000305*	0.0180664*
-11.26*	-0.0036*	0.00793*	-0.005*	0.0102539*
-11.16*	-0.0036*	0.0103149*	-0.0128174*	0.0110474*
-11.06*	0.00812*	0.017334*	-0.00421*	0.0110474*
-10.96*	-0.00671*	0.0142212*	-0.0143433*	0.000122*
-10.86*	0.000305*	0.0212402*	-0.000305*	0.0196533*
-10.76*	0.000308*	0.0212402*	-0.000302*	0.0102539*
-10.66*	0.000305*	0.024353*	-0.000305*	0.0180664*
-10.56*	0.00812*	0.0337524*	-0.00342*	0.0196533*
-10.46*	0.000305*	0.0259399*	-0.005*	0.00793*
-10.36*	0.000305*	0.0282593*	-0.005*	0.0141602*
-10.26*	0.00342*	0.024353*	-0.012023*	0.0102539*
-10.16*	0.000305*	0.0290527*	-0.0151367*	0.00323*
-10.06*	-0.0114136*	0.0142212*	-0.0284424*	0.00323*
-9.96002*	-0.0114136*	0.0165405*	-0.0362549*	-0.00848*
-9.85999*	-0.0184326*	0.0025*	-0.0455933*	-0.0115967*
-9.76001*	-0.0309377*	0.000916*	-0.0510793*	-0.0233154*
-9.65997*	-0.027832*	-0.0022*	-0.0510864*	-0.00928*
-9.56*	-0.0153198*	0.0103149*	-0.0401611*	0.00323*
-9.46002*	-0.0231323*	0.0142212*	-0.0432739*	-0.00378*
-9.35999*	-0.0114136*	0.0165405*	-0.0432739*	0.00244*
-9.26001*	-0.0231323*	0.0126343*	-0.0432739*	-0.00146*
-9.15997*	-0.027832*	0.00562*	-0.0463867*	-0.00848*
-9.06*	-0.0114136*	0.0142212*	-0.0393677*	-0.00458*
-8.96002*	-0.0153198*	0.017334*	-0.0401611*	-0.00378*
-8.85999*	-0.0106201*	0.00952*	-0.0432739*	0.00323*
-8.76001*	-0.00281*	0.0212402*	-0.0346661*	0.00323*
-8.65997*	-0.0114136*	0.017334*	-0.0385742*	0.00323*
-8.56*	-0.027832*	0.00952*	-0.0409546*	-0.00848*
-8.46002*	-0.0293579*	0.00641*	-0.034668*	-0.00769*
-8.35999*	-0.0161133*	0.0126343*	-0.0432739*	-0.0162964*
-8.26001*	-0.023128*	0.00952*	-0.0510821*	-0.0131836*
-8.15997*	-0.0114136*	0.0165405*	-0.0510864*	-0.00928*
-8.06*	-0.0200195*	0.0103149*	-0.0432739*	-0.0155029*
-7.96002*	-0.0153198*	0.00562*	-0.0549927*	-0.00848*
-7.85999*	-0.00671*	0.00952*	-0.0401611*	-0.00378*
-7.76001*	0.000302*	0.00952*	-0.0432768*	-0.00458*
-7.65997*	-0.0130005*	-0.0115967*	-0.0432739*	-0.0178833*
-7.56*	-0.0153198*	-0.013916*	-0.0549927*	-0.0202026*
-7.46002*	-0.0270386*	-0.0256348*	-0.0596924*	-0.0280151*
-7.35999*	-0.0215454*	-0.0123291*	-0.0463867*	-0.0311279*
-7.26001*	-0.0083*	-0.0100098*	-0.050293*	-0.0233154*
-7.15997*	-0.0153198*	-0.0217285*	-0.0432739*	-0.0241089*
-7.06*	-0.0184326*	-0.0248413*	-0.0385742*	-0.0358276*
-6.96002*	-0.0161133*	-0.022522*	-0.0245361*	-0.0288086*
-6.85999*	-0.0153198*	-0.0217285*	-0.0206299*	-0.0327148*
-6.76001*	-0.00983*	-0.0248413*	-0.00733*	-0.0264282*
-6.65997*	-0.0161133*	-0.0342407*	-0.00732*	-0.0241089*
-6.56*	-0.0114136*	-0.0217285*	-0.000305*	-0.0280151*
-6.46002*	-0.0114136*	-0.0264282*	0.00671*	-0.0256958*
-6.35999*	-0.0083*	-0.0334473*	-0.0120239*	-0.0233154*
-6.26001*	-0.0153079*	-0.0412598*	-0.0089*	-0.0280151*
-6.15997*	0.00421*	-0.0287476*	0.0153198*	-0.00848*
-6.06*	0.0011*	-0.0217285*	0.00751*	-0.0162964*
-5.96002*	0.0167236*	-0.0209351*	0.0161133*	-0.0194092*
-5.85999*	0.000305*	-0.022522*	0.00439*	-0.0241089*
-5.76001*	0.00342*	-0.0217285*	0.0192232*	-0.0162964*
-5.65997*	0.00812*	-0.038147*	0.0145264*	-0.0288086*
-5.56*	0.00812*	-0.0412598*	0.00751*	-0.0358276*
-5.46002*	0.00812*	-0.0412598*	0.00751*	-0.0311279*
-5.35999*	0.0097*	-0.0365601*	0.00751*	-0.0241089*
-5.26001*	0.0151367*	-0.0365601*	0.0192261*	-0.0123901*
-5.15997*	0.0198364*	-0.029541*	0.0192261*	-0.0241089*
-5.06*	0.0120239*	-0.0420532*	0.00751*	-0.0241089*
-4.96002*	0.00812*	-0.0365601*	0.0153198*	-0.0280151*
-4.85999*	0.0112305*	-0.0428467*	0.0106201*	-0.0249023*
-4.76001*	0.0128174*	-0.0287476*	0.0317383*	-0.0162964*
-4.65997*	0.0112305*	-0.0217285*	0.0387573*	-0.0280151*
-4.56*	0.0128174*	-0.0248413*	0.0356445*	-0.0311279*
-4.46002*	0.000305*	-0.0373535*	0.0340576*	-0.0358276*
-4.35999*	0.000305*	-0.0373535*	0.0387573*	-0.0436401*
-4.26001*	0.00732*	-0.0303345*	0.0426593*	-0.0366211*
-4.15997*	-0.0114136*	-0.0373535*	0.0145264*	-0.0467529*
-4.06*	-0.0114136*	-0.0459595*	0.0153198*	-0.0522461*
-3.96002*	-0.0145264*	-0.0412598*	0.0239258*	-0.0389404*
-3.85999*	-0.0239258*	-0.0568848*	0.0145264*	-0.0561523*
-3.76001*	-0.0387602*	-0.0639038*	-0.000308*	-0.0701904*
-3.65997*	-0.0551758*	-0.0803223*	-0.00732*	-0.0748901*
-3.56*	-0.0739136*	-0.0803223*	-0.0167236*	-0.0866089*
-3.46002*	-0.0653076*	-0.0733032*	-0.00732*	-0.0748901*
-3.35999*	-0.0864258*	-0.0967407*	-0.0097*	-0.0874023*
-3.26001*	-0.093442*	-0.10376*	-0.0315523*	-0.0944214*
-3.15997*	-0.0887451*	-0.0990601*	-0.0268555*	-0.10144*
-3.06*	-0.0817261*	-0.0842285*	-0.0237427*	-0.0913086*
-2.96002*	-0.0739136*	-0.076416*	-0.0307617*	-0.0983276*
-2.85999*	-0.0457764*	-0.0513916*	-0.0393677*	-0.0701904*
-2.76001*	-0.0208144*	-0.0194092*	-0.016725*	-0.0405273*
-2.65997*	-0.0332642*	-0.0334473*	-0.0338745*	-0.0592651*
-2.56*	-0.0348511*	-0.0287476*	-0.0409546*	-0.0545654*
-2.46002*	-0.0231323*	-0.013916*	-0.050293*	-0.0397339*
-2.35999*	-0.0247192*	-0.00378*	-0.0596924*	-0.0491333*
-2.26001*	-0.0410567*	0.0072*	-0.072917*	-0.0529785*
-2.15997*	-0.0247192*	0.0368652*	-0.0675049*	-0.0327148*
-2.06*	-0.0036*	0.0634155*	-0.0565796*	-0.000671*
-1.96002*	-0.00281*	0.0783081*	-0.0565186*	-0.00769*
-1.85999*	-0.0496826*	0.0899658*	-0.0479736*	-0.0202026*
-1.76001*	-0.0308967*	0.0837402*	-0.0549445*	-0.000671*
-1.65997*	-0.0184326*	0.111877*	0.00519*	0.00793*
-1.56*	0.0182495*	0.138428*	0.0457764*	-0.00146*
-1.46002*	0.00891*	0.143127*	0.0661011*	-0.0202026*
-1.35999*	0.00891*	0.143127*	0.0708008*	0.0126343*
-1.26001*	0.0472312*	0.140747*	0.0848899*	0.0297852*
-1.15997*	0.0792236*	0.15094*	0.090332*	0.0813599*
-1.06*	0.105774*	0.17749*	0.128601*	0.0844727*
-0.960022*	0.125305*	0.17749*	0.148132*	0.105591*
-0.859985*	0.0987549*	0.158752*	0.148132*	0.105591*
-0.76001*	0.20037*	0.15094*	0.195853*	0.14386*
-0.659973*	0.237793*	0.14624*	0.206726*	0.179016*
-0.559998*	0.360474*	0.189209*	0.272339*	0.238403*
-0.460022*	0.410461*	0.173584*	0.347351*	0.24469*
-0.359985*	0.367493*	0.160278*	0.307495*	0.147766*
-0.26001*	0.291351*	0.165771*	0.251679*	0.221191*
-0.159973*	-0.220764*	-0.365479*	-0.429993*	-0.0803833*
-0.0599976*	-0.144226*	-0.206909*	-0.187073*	-0.0663452*
0.039978*	0.307312*	0.203247*	0.316101*	0.23291*
0.140015*	0.107361*	-0.206909*	0.0918579*	-0.0787964*
0.23999*	-0.366782*	-0.276428*	0.183389*	-0.0366211*
0.340027*	-2.40826*	-0.562317*	0.417664*	0.147766*
0.440002*	-7.81061*	-1.51544*	-0.295593*	-0.0490723*
0.539978*	-14.8169*	-3.72327*	-1.2323*	-0.245972*
0.640015*	-21.8481*	-5.98187*	-1.78467*	-0.463928*
0.73999*	-28.8568*	-8.13812*	-2.53237*	-0.659241*
0.840027*	-35.6857*	-10.6671*	-3.2417*	-0.969421*
0.940002*	-42.0466*	-12.9913*	-4.03076*	-1.29987*
1.03998*	-48.5435*	-15.0944*	-4.81201*	-1.53973*
1.14001*	-54.6779*	-17.2733*	-5.61749*	-1.81787*
1.23999*	-60.7146*	-19.4366*	-6.39017*	-2.09753*
1.34003*	-66.2692*	-21.621*	-7.15894*	-2.3952*
1.44*	-71.588*	-23.7327*	-7.87689*	-2.66705*
1.53998*	-76.731*	-25.7874*	-8.59644*	-2.93115*
1.64001*	-81.4684*	-27.7921*	-9.29095*	-3.1983*
1.73999	-85.9333*	-29.5608*	-9.948*	-3.43817*
1.84003	-90.2762*	-31.2475*	-10.6214*	-3.67487*
1.94	-94.3364*	-32.9725*	-11.2753*	-3.93036*
2.03998	-98.1911*	-34.6881*	-11.887*	-4.18268*
2.14001	-101.719*	-36.2538*	-12.4113*	-4.41632*
2.23999	-104.925*	-37.6358*	-12.9581*	-4.65692*
2.34003	-107.872*	-38.9639*	-13.5003*	-4.87177*
2.44	-110.43*	-40.2756*	-14.0269*	-5.09283*
2.53998	-112.675*	-41.5647*	-14.5566*	-5.30383*
2.64001	-114.742*	-42.7428*	-15.0737*	-5.49207*
2.73999	-116.672*	-43.8522*	-15.5823*	-5.68195*
2.84003	-118.283*	-44.8553*	-16.0433*	-5.88739*
2.94	-119.62*	-45.8155*	-16.4597*	-6.06787*
3.03998	-120.729*	-46.7178*	-16.8628*	-6.2569*
3.14001	-121.525*	-47.553*	-17.2643*	-6.4491*
3.23999	-122.074*	-48.3217*	-17.6448*	-6.65222*
3.34003	-122.411*	-48.9819*	-17.9675*	-6.82959*
3.44	-122.517*	-49.6092*	-18.2987*	-6.98267*
3.53998	-122.244*	-50.235*	-18.6675*	-7.15222*
3.64001	-121.857*	-50.824*	-18.9784*	-7.31787*
3.73999	-121.195*	-51.3069*	-19.2527*	-7.48505*
3.84003	-120.332*	-51.6155*	-19.498*	-7.64288*
3.94	-118.929*	-51.9319*	-19.7324*	-7.79205*
4.03998	-117.478*	-52.192*	-19.955*	-7.9632*
4.14001	-115.865*	-52.4584*	-20.1761*	-8.10773*
4.23999	-114.104*	-52.685*	-20.3292*	-8.22955*
4.34003	-112.09*	-52.8475*	-20.4785*	-8.35773*
4.44	-109.793*	-52.9733*	-20.6183*	-8.45221*
4.53998	-107.29*	-53.0475*	-20.7753*	-8.58899*
4.64001	-104.678*	-53.0991*	-20.9105*	-8.70532*
4.73999	-101.986*	-53.0663*	-21.0323*	-8.7796*
4.84003	-99.1419*	-53.0303*	-21.1456*	-8.86475*
4.94	-95.9255*	-52.9233*	-21.2816*	-8.97882*
5.03998	-92.6638*	-52.7006*	-21.3839*	-9.0733*
5.14001	-89.1895*	-52.4905*	-21.5081*	-9.146*
5.23999	-85.6536*	-52.2428*	-21.6183*	-9.20538*
5.34003	-82.1036*	-51.9858*	-21.6909*	-9.26318*
5.44	-78.3255*	-51.7037*	-21.7472*	-9.35773*
5.53998	-74.3544*	-51.3561*	-21.7972*	-9.43195*
5.64001	-70.3497*	-50.9366*	-21.8433*	-9.49908*
5.73999	-66.1927*	-50.485*	-21.8597*	-9.5874*
5.84003	-62.013*	-50.0186*	-21.8597*	-9.64288*
5.94	-57.8521*	-49.5381*	-21.8597*	-9.71631*
6.03998	-53.4942*	-48.9882*	-21.8503*	-9.771*
6.14001	-49.0325*	-48.342*	-21.8276*	-9.80768*
6.23999	-44.5489*	-47.6741*	-21.7847*	-9.85693*
6.34003	-40.1927*	-46.9405*	-21.7456*	-9.9046*
6.44	-35.8364*	-46.1764*	-21.6792*	-9.94598*
6.53998	-31.3794*	-45.4053*	-21.6167*	-9.9632*
6.64001	-26.8864*	-44.635*	-21.5894*	-10.0007*
6.73999	-22.3122*	-43.8256*	-21.5229*	-10.046*
6.84003	-17.9403*	-43.01*	-21.4526*	-10.0944*
6.94	-13.6161*	-42.0959*	-21.3354*	-10.1132*
7.03998	-9.27155	-41.1061*	-21.237*	-10.1226*
7.14001	-4.89111	-40.1061*	-21.144*	-10.1382*
7.23999	-0.444204	-39.0733*	-21.0175*	-10.1655*
7.34003	3.70422	-38.0115*	-20.8846*	-10.1694*
7.44	8.00732	-36.9264*	-20.7698*	-10.2132*
7.53998	12.0925	-35.8475*	-20.6597*	-10.2397*
7.64001	16.1699	-34.7123*	-20.5292*	-10.271*
7.73999	20.1722	-33.5499*	-20.3737*	-10.271*
7.84003	24.13	-32.3358*	-20.2261*	-10.271*
7.94	28.1589	-31.1006*	-20.1112*	-10.271*
8.03998	31.8964	-29.8233*	-19.9394*	-10.264*
8.14001	35.5136	-28.5468*	-19.7761*	-10.2788*
8.23999	39.0331	-27.2256*	-19.5948*	-10.2827*
8.34003	42.4948	-25.9069*	-19.444*	-10.2788*
8.44	45.8807	-24.5413*	-19.2729*	-10.2991*
8.53998	49.319	-23.1483*	-19.0792*	-10.2991*
8.64001	52.5737	-21.7592*	-18.9003*	-10.2921*
8.73999	55.8628	-20.3155*	-18.7222*	-10.2648*
8.84003	58.9565	-18.9014*	-18.5331*	-10.2484*
8.94	61.8159	-17.4749*	-18.3464*	-10.2632*
9.03998	64.5261	-15.9866*	-18.1495*	-10.2749*
9.14001	67.3495	-14.5209*	-17.9745*	-10.2772*
9.23999	70.3206	-13.0413*	-17.7636*	-10.2484*
9.34003	72.9925	-11.546*	-17.5644*	-10.2468*
9.44	75.3948	-10.06*	-17.3581*	-10.2241*
9.53998	77.7714	-8.54907	-17.1777*	-10.2093*
9.64001	80.1526	-6.99518	-16.9269*	-10.1819*
9.73999	82.4808	-5.44592	-16.6503*	-10.1577*
9.84003	84.6971	-3.87561	-16.4003*	-10.1436*
9.94	86.8347	-2.29907	-16.1456*	-10.1226*
10.04	88.8401	-0.740479	-15.8886*	-10.0999*
10.14	90.8378	0.811096	-15.623*	-10.0562*
10.24	92.8378	2.38611	-15.3323*	-10.0468*
10.34	94.5995	3.97986	-15.0519*	-10.0179*
10.44	96.4511	5.565	-14.7722*	-9.98505
10.54	98.0518	7.15485	-14.5128*	-9.9671
10.64	99.6393	8.73297	-14.2558*	-9.93506
10.74	101.259	10.3447	-14.0144*	-9.8952
10.84	102.803	11.9494	-13.7425*	-9.86005
10.94	104.249	13.4634	-13.4425*	-9.82648
11.04	105.693	15.0103	-13.1542*	-9.79443
11.14	107.143	16.5541	-12.8769*	-9.78583
11.24	108.413	18.115	-12.5948*	-9.76788
11.34	109.654	19.6744	-12.2956*	-9.69366
11.44	110.804	21.222	-12.005*	-9.6452
11.54	111.984	22.7541	-11.68*	-9.59833
11.64	113.081	24.2955	-11.3613*	-9.57257
11.74	114.186	25.8736	-11.0214*	-9.52881
11.84	115.163	27.3666	-10.705*	-9.49286
11.94	116.16	28.8634	-10.3714*	-9.44208
12.04	117.135	30.315	-10.0573*	-9.39209
12.14	118.094	31.7611	-9.71515	-9.35773
12.24	119.019	33.1955	-9.38781	-9.34052
12.34	119.812	34.6666	-9.03235	-9.26318
12.44	120.53	36.1283	-8.69641	-9.24365
12.54	121.285	37.5697	-8.34955	-9.19989
12.64	122.038	38.9876	-8.01831	-9.14288
12.74	122.801	40.4713	-7.66516	-9.07098
12.84	123.515	41.8861	-7.3175	-9.03271
12.94	124.138	43.2307	-6.92999	-8.98895
13.04	124.753	44.5072	-6.58313	-8.94989
13.14	125.317	45.8322	-6.21674	-8.89679
13.24	125.895	47.1166	-5.84955	-8.82489
13.34	126.508	48.3861	-5.49329	-8.72803
13.44	127.056	49.6916	-5.10657	-8.67566
13.54	127.597	51.004	-4.71204	-8.60693
13.64	128.086	52.233	-4.34955	-8.54053
13.74	128.582	53.4056	-3.9433	-8.48584
13.84	129.024	54.5658	-3.54016	-8.43195
13.94	129.441	55.7189	-3.15735	-8.39832
14.04	129.84	56.858	-2.77844	-8.33429
14.14	130.271	58.008	-2.3761	-8.27722
14.24	130.711	59.1407	-1.96594	-8.21942
14.34	131.09	60.2798	-1.54565	-8.17493
14.44	131.371	61.3837	-1.1214	-8.1366
14.54	131.716	62.4377	-0.720581	-8.05927
14.64	132.041	63.5619	-0.329224	-7.99835
14.74	132.367	64.5931	0.0848408	-7.95691
14.84	132.668	65.5775	0.494202	-7.89368
14.94	133.013	66.622	0.919983	-7.84052
15.04	133.364	67.6173	1.34265	-7.76709
15.14	133.653	68.6205	1.75281	-7.73584
15.24	133.931	69.6454	2.19971	-7.66473
15.34	134.161	70.5204	2.65045	-7.59753
15.44	134.419	71.4095	3.05981	-7.54523
15.54	134.653	72.2618	3.4989	-7.4585
15.64	134.881	73.1611	3.93018	-7.3905
15.74	135.1	74.0392	4.3692	-7.31396
15.84	135.302	74.9111	4.78876	-7.24597
15.94	135.501	75.797	5.23016	-7.16553
16.04	135.697	76.7853	5.66998	-7.10303
16.14	135.911	77.4329	6.10046	-7.04443
16.24	136.091	78.1017	6.56452	-6.9538
16.34	136.283	78.822	7.0036	-6.90302
16.44	136.47	79.636	7.46765	-6.81787
16.54	136.649	80.3986	7.92859	-6.72803
16.64	136.803	81.1658	8.38641	-6.64832
16.74	136.995	81.8189	8.83094	-6.55615
16.84	137.196	82.4486	9.3114	-6.46942
16.94	137.342	82.9525	9.78876	-6.41162
17.04	137.489	83.4916	10.2403	-6.37256
17.14	137.615	84.0837	10.6903	-6.30145
17.24	137.727	84.6954	11.1583	-6.20929
17.34	137.886	85.3502	11.6247	-6.12567
17.44	138.029	85.9619	12.0645	-6.02722
17.54	138.165	86.5587	12.5075	-5.94287
17.64	138.294	87.1368	12.9551	-5.87335
17.74	138.413	87.6713	13.4138	-5.80066
17.84	138.53	88.24	13.8848	-5.73505
17.94	138.658	88.7424	14.3239	-5.6499
18.04	138.771	89.215	14.7731	-5.55225
18.14	138.877	89.6915	15.2559	-5.44208
18.24	138.999	90.204	15.7067	-5.36865
18.34	139.127	90.6931	16.1591	-5.29675
18.44	139.236	91.1954	16.6169	-5.21161
18.54	139.319	91.6681	17.0731	-5.11945
18.64	139.443	92.2618	17.5294	-5.02881
18.74	139.534	92.7939	17.9716	-4.95691
18.84	139.615	93.2384	18.4356	-4.86163
18.94	139.687	93.54	18.8825	-4.78113
19.04	139.782	93.915	19.3434	-4.7038
19.14	139.896	94.3204	19.8067	-4.60382
19.24	139.999	94.6619	20.2388	-4.52722
19.34	140.081	95.0197	20.67	-4.44989
19.44	140.139	95.397	21.1021	-4.37646
19.54	140.236	95.7697	21.5489	-4.29364
19.64	140.29	96.136	21.9989	-4.22333
19.74	140.351	96.4783	22.4645	-4.1413
19.84	140.443	96.8204	22.9044	-4.03351
19.94	140.521	97.1212	23.3348	-3.93427
20.04	140.604	97.4384	23.8013	-3.84442
20.14	140.652	97.7423	24.202	-3.76239
20.24	140.705	98.033	24.6317	-3.69989
20.34	140.764	98.2962	25.0645	-3.60852
20.44	140.839	98.5283	25.5114	-3.50299
20.54	140.87	98.7783	25.9567	-3.3913
20.64	140.939	99.0696	26.3809	-3.28351
20.74	141.014	99.3259	26.8122	-3.18817
20.84	141.077	99.5994	27.2341	-3.07098
20.94	141.113	99.8525	27.6395	-3.00458
21.04	141.153	100.117	28.045	-2.90302
21.14	141.191	100.359	28.4598	-2.80615
21.24	141.245	100.615	28.8591	-2.72021
21.34	141.284	100.849	29.2841	-2.61395
21.44	141.31	101.052	29.7075	-2.5163
21.54	141.362	101.258	30.1067	-2.42645
21.64	141.413	101.453	30.4966	-2.34131
21.74	141.449	101.67	30.8942	-2.23505
21.84	141.487	101.876	31.2833	-2.14832
21.94	141.529	102.03	31.6669	-2.03821
22.04	141.568	102.185	32.0653	-1.92957
22.14	141.621	102.376	32.4771	-1.82098
22.24	141.678	102.529	32.8231	-1.72803
22.34	141.728	102.726	33.2098	-1.6452
22.44	141.769	102.872	33.5739	-1.55145
22.54	141.823	103.045	33.9598	-1.45068
22.64	141.867	103.212	34.3317	-1.34283
22.74	141.924	103.369	34.7098	-1.23584
22.84	141.951	103.503	35.0692	-1.13818
22.94	142	103.658	35.4434	-1.04523
23.04	142.026	103.818	35.8005	-0.975647
23.14	142.062	103.976	36.1724	-0.852234
23.24	142.071	104.091	36.5286	-0.756958
23.34	142.097	104.255	36.8856	-0.660034
23.44	142.132	104.399	37.2271	-0.54834
23.54	142.152	104.501	37.5809	-0.465515
23.64	142.179	104.607	37.9185	-0.359253
23.74	142.221	104.731	38.2919	-0.258484
23.84	142.233	104.845	38.6348	-0.174133
23.94	142.249	104.945	38.9724	-0.0748901
24.04	142.286	105.066	39.3122	0.0360718
24.14	142.307	105.192	39.6489	0.154785
24.24	142.335	105.32	39.97	0.247742
24.34	142.393	105.415	40.288	0.358704
24.44	142.398	105.498	40.6224	0.448547
24.54	142.432	105.625	40.9747	0.541504
24.64	142.471	105.724	41.2755	0.63916
24.74	142.473	105.814	41.5747	0.727478
24.84	142.495	105.915	41.8825	0.839172
24.94	142.522	106	42.1934	0.942261
25.04	142.576	106.106	42.4919	1.05872
25.14	142.606	106.205	42.7927	1.16809
25.24	142.632	106.278	43.0817	1.27197
25.34	142.636	106.385	43.3653	1.38135
25.44	142.632	106.449	43.6552	1.46417
25.54	142.658	106.545	43.9724	1.58057
25.64	142.644	106.615	44.2489	1.67511
25.74	142.656	106.692	44.5278	1.7962
25.84	142.675	106.787	44.8161	1.92981
25.94	142.697	106.872	45.1036	2.05634
26.04	142.721	106.937	45.3552	2.13605
26.14	142.699	106.986	45.62	2.21338
26.24	142.707	107.044	45.863	2.32043
26.34	142.732	107.11	46.1309	2.44305
26.44	142.761	107.164	46.4099	2.53918
26.54	142.774	107.244	46.6528	2.65558
26.64	142.768	107.29	46.9005	2.76807
26.74	142.768	107.321	47.1567	2.87122
26.84	142.792	107.368	47.4005	2.95477
26.94	142.812	107.438	47.6481	3.0423
27.04	142.836	107.467	47.8825	3.13605
27.14	142.826	107.503	48.134	3.23212
27.24	142.858	107.584	48.356	3.34778
27.34	142.879	107.615	48.5934	3.44464
27.44	142.889	107.638	48.827	3.54932
27.54	142.897	107.669	49.0388	3.65167
27.64	142.926	107.705	49.2888	3.77435
27.74	142.96	107.744	49.5067	3.88605
27.84	142.979	107.82	49.7255	3.9696
27.94	142.996	107.849	49.9442	4.07355
28.04	143.012	107.885	50.1763	4.20636
28.14	143.017	107.938	50.3778	4.30402
28.24	143.026	107.965	50.57	4.40558
28.34	143.05	108.006	50.7692	4.50012
28.44	143.066	108.067	50.9755	4.61182
28.54	143.057	108.102	51.1708	4.7243
28.64	143.074	108.149	51.3786	4.82355
28.74	143.071	108.19	51.5778	4.91339
28.84	143.053	108.212	51.7692	5.02277
28.94	143.047	108.236	51.9419	5.14075
29.04	143.035	108.262	52.1091	5.26727
29.14	143.023	108.31	52.2762	5.37433
29.24	142.996	108.334	52.4247	5.4837
29.34	142.966	108.381	52.5708	5.59778
29.44	142.942	108.404	52.731	5.72589
29.54	142.914	108.442	52.9005	5.85712
29.64	142.899	108.456	53.0396	5.95636
29.74	142.883	108.478	53.2145	6.07825
29.84	142.838	108.478	53.3763	6.20245
29.94	142.81	108.522	53.5349	6.30872
30.04	142.807	108.529	53.6919	6.42041
30.14	142.743	108.517	53.8387	6.50714
30.24	142.672	108.47	53.9997	6.60321
30.34	142.644	108.467	54.1567	6.71185
30.44	142.706	108.487	54.3138	6.83057
30.54	142.689	108.49	54.4645	6.92822
30.64	142.678	108.473	54.6013	7.02435
30.74	142.651	108.498	54.7466	7.13214
30.84	142.628	108.5	54.8724	7.21887
30.94	142.636	108.514	54.9692	7.32355
31.04	142.623	108.503	55.0895	7.4165
31.14	142.613	108.503	55.2271	7.53058
31.24	142.6	108.546	55.356	7.62433
31.34	142.569	108.565	55.4606	7.70245
31.44	142.544	108.569	55.563	7.80011
31.54	142.543	108.574	55.6567	7.91339
31.64	142.546	108.585	55.7661	8.01105
31.74	142.529	108.576	55.8513	8.10089
31.84	142.52	108.585	55.9419	8.19543
31.94	142.534	108.596	56.0435	8.31183
32.04	142.498	108.57	56.1333	8.4165
32.14	142.497	108.492	56.2114	8.52826
32.24	142.51	108.488	56.2825	8.62744
32.34	142.488	108.472	56.363	8.72668
32.44	142.496	108.472	56.4193	8.83136
32.54	142.495	108.463	56.5145	8.94073
32.64	142.468	108.438	56.5841	9.02356
32.74	142.444	108.428	56.6599	9.11572
32.84	142.459	108.436	56.738	9.2298
32.94	142.449	108.445	56.813	9.32434
33.04	142.417	108.425	56.8802	9.40637
33.14	142.393	108.397	56.9489	9.49463
33.24	142.354	108.367	57.0208	9.61029
33.34	142.325	108.343	57.0864	9.71729
33.44	142.315	108.335	57.1372	9.80951
33.54	142.316	108.308	57.2153	9.90167
33.64	142.278	108.263	57.2888	9.98682
33.74	142.268	108.242	57.3442	10.0892
33.84	142.253	108.219	57.4193	10.1806
33.94	142.217	108.195	57.4536	10.2532
34.04	142.193	108.166	57.5075	10.3392
34.14	142.191	108.121	57.5599	10.4259
34.24	142.171	108.117	57.6099	10.5063
34.34	142.151	108.112	57.6606	10.5743
34.44	142.118	108.081	57.6747	10.6595
34.54	142.097	108.046	57.7161	10.7431
34.64	142.042	108	57.7552	10.8188
34.74	142.014	107.974	57.752	10.89
34.84	141.976	107.93	57.7716	10.965
34.94	141.947	107.874	57.8052	11.0306
35.04	141.937	107.817	57.8286	11.122
35.14	141.928	107.783	57.8395	11.2025
35.24	141.899	107.746	57.8716	11.2954
35.34	141.878	107.695	57.8833	11.3751
35.44	141.86	107.632	57.8802	11.4611
35.54	141.824	107.616	57.8981	11.5501
35.64	141.785	107.62	57.9028	11.6329
35.74	141.741	107.57	57.895	11.7056
35.84	141.714	107.535	57.9263	11.7665
35.94	141.661	107.495	57.931	11.8314
36.04	141.632	107.471	57.9403	11.9212
36.14	141.595	107.437	57.938	11.9798
36.24	141.546	107.394	57.938	12.04
36.34	141.514	107.347	57.9333	12.1157
36.44	141.478	107.267	57.9193	12.1876
36.54	141.416	107.187	57.9325	12.2446
36.64	141.41	107.078	57.9388	12.3126
36.74	141.388	107.003	57.938	12.3673
36.84	141.361	106.952	57.902	12.4165
36.94	141.335	106.903	57.8997	12.4626
37.04	141.319	106.839	57.9067	12.5345
37.14	141.287	106.776	57.9067	12.59
37.24	141.27	106.708	57.9099	12.647
37.34	141.237	106.668	57.9028	12.6938
37.44	141.201	106.624	57.9341	12.754
37.54	141.192	106.556	57.9411	12.8126
37.64	141.171	106.504	57.9263	12.89
37.74	141.171	106.478	57.9263	12.9438
37.84	141.12	106.413	57.8973	13.0009
37.94	141.071	106.352	57.8966	13.0501
38.04	141.037	106.288	57.8747	13.1095
38.14	141.006	106.232	57.8317	13.1595
38.24	140.978	106.147	57.7943	13.222
38.34	140.945	106.104	57.7676	13.2806
38.44	140.92	106.042	57.7318	13.3361
38.54	140.884	105.967	57.688	13.3868
38.64	140.839	105.882	57.6489	13.4376
38.74	140.844	105.831	57.6325	13.4985
38.84	140.809	105.793	57.606	13.5579
38.94	140.829	105.725	57.5739	13.6134
39.04	140.813	105.679	57.5309	13.6595
39.14	140.771	105.624	57.5208	13.7072
39.24	140.735	105.54	57.4919	13.7532
39.34	140.707	105.487	57.4724	13.7954
39.44	140.685	105.431	57.4575	13.8478
39.54	140.654	105.387	57.4036	13.8798
39.64	140.591	105.356	57.3747	13.9446
39.74	140.55	105.331	57.3661	13.9938
39.84	140.516	105.283	57.3364	14.0275
39.94	140.482	105.21	57.2974	14.0665
40.04	140.431	105.151	57.2661	14.1126
40.14	140.387	105.073	57.2239	14.1517
40.24	140.398	105.012	57.1864	14.1907
40.34	140.383	104.956	57.1567	14.2298
40.44	140.373	104.897	57.1372	14.2689
40.54	140.353	104.846	57.0981	14.3017
40.64	140.328	104.777	57.0934	14.3314
40.74	140.317	104.708	57.0864	14.3821
40.84	140.297	104.646	57.0497	14.4165
40.94	140.293	104.588	57.0208	14.4485
41.04	140.251	104.513	57.0161	14.4814
41.14	140.246	104.449	56.9888	14.5181
41.24	140.239	104.418	56.9747	14.5618
41.34	140.222	104.381	56.9349	14.59
41.44	140.212	104.338	56.8989	14.6173
41.54	140.168	104.306	56.8474	14.6587
41.64	140.129	104.236	56.7849	14.6681
41.74	140.121	104.185	56.7224	14.7056
41.84	140.107	104.144	56.688	14.7493
41.94	140.102	104.119	56.6372	14.7775
42.04	140.054	104.085	56.6099	14.8087
42.14	140.031	104.027	56.5544	14.8337
42.24	140.017	103.991	56.5083	14.8603
42.34	139.969	103.935	56.4692	14.8939
42.44	139.921	103.87	56.4302	14.9087
42.54	139.904	103.816	56.3825	14.9345
42.64	139.878	103.77	56.3481	14.9626
42.74	139.849	103.733	56.3044	14.9884
42.84	139.807	103.678	56.2536	15.0126
42.94	139.769	103.635	56.2153	15.0376
43.04	139.724	103.552	56.188	15.0618
43.14	139.704	103.499	56.1372	15.0814
43.24	139.646	103.475	56.1013	15.1056
43.34	139.574	103.431	56.0505	15.1306
43.44	139.54	103.393	55.9919	15.1525
43.54	139.486	103.319	55.931	15.1564
43.64	139.431	103.249	55.8942	15.179
43.74	139.373	103.196	55.8317	15.1954
43.84	139.334	103.12	55.7825	15.229
43.94	139.295	103.062	55.7388	15.2431
44.04	139.252	103.005	55.6833	15.2634
44.14	139.208	102.972	55.6247	15.2775
44.24	139.146	102.87	55.5544	15.2845
44.34	139.081	102.819	55.4888	15.2923
44.44	139.04	102.783	55.4544	15.3118
44.54	138.978	102.717	55.4091	15.3314
44.64	138.919	102.662	55.3747	15.3431
44.74	138.878	102.613	55.3216	15.3439
44.84	138.822	102.596	55.2778	15.3548
44.94	138.778	102.556	55.2294	15.3704
45.04	138.725	102.513	55.1638	15.3853
45.14	138.674	102.465	55.1177	15.3994
45.24	138.647	102.409	55.0755	15.4165
45.34	138.621	102.337	55.0302	15.429
45.44	138.603	102.264	54.9528	15.4485
45.54	138.572	102.237	54.8919	15.4572
45.64	138.577	102.178	54.8403	15.472
45.74	138.533	102.113	54.7896	15.4931
45.84	138.454	102.061	54.7231	15.5103
45.94	138.41	101.988	54.6591	15.5228
46.04	138.372	101.928	54.6177	15.5259
46.14	138.331	101.882	54.5544	15.5322
46.24	138.306	101.823	54.4888	15.5587
46.34	138.231	101.742	54.4216	15.572
46.44	138.178	101.707	54.3395	15.5939
46.54	138.134	101.631	54.3169	15.6173
46.64	138.083	101.564	54.2583	15.6204
46.74	138.05	101.497	54.2145	15.6306
46.84	137.986	101.441	54.1638	15.6329
46.94	137.939	101.405	54.1325	15.6415
47.04	137.91	101.358	54.0786	15.647
47.14	137.869	101.295	54.0114	15.6447
47.24	137.824	101.24	53.9896	15.6595
47.34	137.802	101.21	53.9481	15.6743
47.44	137.771	101.174	53.8989	15.6806
47.54	137.728	101.108	53.8481	15.6876
47.64	137.71	101.103	53.7927	15.7126
47.74	137.669	101.077	53.7552	15.7032
47.84	137.614	101.013	53.6708	15.7103
47.94	137.61	100.974	53.6278	15.7462
48.04	137.567	100.916	53.5591	15.7532
48.14	137.494	100.863	53.4818	15.7462
48.24	137.469	100.818	53.4567	15.765
48.34	137.446	100.765	53.4138	15.7728
48.44	137.398	100.742	53.3591	15.7689
48.54	137.349	100.703	53.3169	15.7806
48.64	137.313	100.654	53.2583	15.7814
48.74	137.267	100.588	53.2028	15.8001
48.84	137.227	100.525	53.1294	15.8048
48.94	137.205	100.506	53.0981	15.8212
49.04	137.171	100.455	53.0513	15.8267
49.14	137.161	100.435	53.0184	15.8353
49.24	137.125	100.413	52.9692	15.8267
49.34	137.08	100.401	52.9106	15.8376
49.44	137.054	100.372	52.8669	15.8415
49.54	137.047	100.303	52.8044	15.8439
49.64	137.036	100.264	52.7474	15.8478
49.74	137.024	100.248	52.6981	15.8556
49.84	137.007	100.22	52.6685	15.8493
49.94	136.994	100.19	52.6177	15.8681
50.04	136.969	100.151	52.5575	15.8634
50.14	136.941	100.117	52.4919	15.8806
50.24	136.923	100.054	52.4263	15.8876
50.34	136.894	100.003	52.3911	15.8868
50.44	136.88	99.94	52.356	15.8994
50.54	136.871	99.9111	52.3286	15.9001
50.64	136.853	99.8884	52.2919	15.9142
50.74	136.828	99.8502	52.2357	15.9111
50.84	136.809	99.7955	52.1802	15.897
50.94	136.792	99.7431	52.1122	15.8853
51.04	136.778	99.7017	52.0622	15.8829
51.14	136.775	99.6697	52.0317	15.8868
51.24	136.769	99.6298	52.0036	15.8735
51.34	136.751	99.608	51.9567	15.8634
51.44	136.727	99.5689	51.9036	15.8556
51.54	136.71	99.5204	51.8536	15.8462
51.64	136.692	99.4626	51.8044	15.8322
51.74	136.668	99.4056	51.7513	15.8243
51.84	136.66	99.3494	51.7263	15.8282
51.94	136.649	99.3033	51.6966	15.8204
52.04	136.626	99.2642	51.6599	15.7993
52.14	136.62	99.2431	51.6247	15.8079
52.24	136.603	99.2095	51.5786	15.8048
52.34	136.589	99.1611	51.5262	15.8001
52.44	136.583	99.1228	51.4841	15.8001
52.54	136.578	99.1166	51.4185	15.8017
52.64	136.563	99.0876	51.3521	15.7923
52.74	136.532	99.0533	51.2935	15.7892
52.84	136.51	99.0157	51.2364	15.7829
52.94	136.496	98.9908	51.1841	15.7767
53.04	136.478	98.9431	51.1536	15.7783
53.14	136.464	98.8814	51.0856	15.761
53.24	136.446	98.8306	51.0052	15.754
53.34	136.442	98.7791	50.9684	15.7579
53.44	136.418	98.7392	50.9044	15.7368
53.54	136.411	98.7064	50.8888	15.7345
53.64	136.391	98.658	50.8591	15.7267
53.74	136.367	98.622	50.8192	15.7251
53.84	136.343	98.5642	50.77	15.7103
53.94	136.314	98.5298	50.7106	15.7001
54.04	136.301	98.4955	50.6685	15.7025
54.14	136.265	98.4845	50.613	15.6907
54.24	136.253	98.4791	50.5864	15.6954
54.34	136.243	98.4439	50.5583	15.6829
54.44	136.214	98.4181	50.5153	15.6665
54.54	136.2	98.3939	50.4739	15.6611
54.64	136.18	98.3689	50.4208	15.6634
54.74	136.15	98.3306	50.3763	15.6486
54.84	136.132	98.3033	50.3083	15.6407
54.94	136.105	98.2775	50.2653	15.6423
55.04	136.083	98.2572	50.231	15.6447
55.14	136.064	98.2166	50.1786	15.6329
55.24	136.058	98.197	50.1442	15.6439
55.34	136.039	98.1822	50.1028	15.6368
55.44	136.015	98.1533	50.0583	15.6274
55.54	135.985	98.1181	49.9989	15.6204
55.64	135.989	98.1002	49.945	15.6126
55.74	135.969	98.0759	49.895	15.6056
55.84	135.946	98.0533	49.8481	15.59
55.94	135.912	98.0087	49.8192	15.5681
56.04	135.885	97.9838	49.7708	15.572
56.14	135.871	97.9619	49.7388	15.5735
56.24	135.846	97.9174	49.6802	15.5548
56.34	135.839	97.8915	49.6395	15.5649
56.44	135.821	97.8798	49.5903	15.5618
56.54	135.796	97.8423	49.5302	15.5423
56.64	135.779	97.8111	49.4935	15.5517
56.74	135.756	97.7986	49.4716	15.5571
56.84	135.724	97.7626	49.4255	15.5423
56.94	135.707	97.7213	49.3716	15.5353
57.04	135.696	97.7134	49.3208	15.5306
57.14	135.671	97.6775	49.2723	15.5259
57.24	135.653	97.6533	49.2192	15.5236
57.34	135.618	97.608	49.188	15.5087
57.44	135.595	97.6049	49.1606	15.4915
57.54	135.589	97.5978	49.1442	15.4946
57.64	135.559	97.5759	49.0895	15.4884
57.74	135.537	97.5463	49.0161	15.4767
57.84	135.53	97.5244	48.988	15.472
57.94	135.505	97.4861	48.9403	15.4525
58.04	135.462	97.4564	48.9075	15.465
58.14	135.445	97.415	48.8669	15.4493
58.24	135.418	97.3876	48.8435	15.4313
58.34	135.371	97.3775	48.827	15.4173
58.44	135.353	97.347	48.806	15.3994
58.54	135.336	97.3408	48.7653	15.3978
58.64	135.325	97.2994	48.7075	15.3994
58.74	135.302	97.2728	48.6755	15.3774
58.84	135.265	97.2353	48.6442	15.3353
58.94	135.246	97.2048	48.5864	15.2853
59.04	135.207	97.158	48.4997	15.2407
59.14	135.196	97.1314	48.4528	15.2103
59.24	135.239	97.1415	48.4302	15.2267
59.34	135.216	97.1049	48.3474	15.1329
59.44	135.066	97.0556	48.2739	15.0688
59.54	135.012	96.9978	48.0966	15.0548
59.64	134.962	96.9212	48.063	15.2595
59.74	135.497	97.4861	48.383	15.4837
59.84	135.542	97.5986	48.5583	15.3118
59.94	135.325	97.1876	48.1192	15.0446
60.04	135.929*	97.4908*	48.2489*	15.2806*
60.14	137.433*	97.2627*	47.9036*	14.9806*
60.24	141.451*	98.9064*	48.7349*	15.3376*
60.34	145.913*	100.498*	49.47*	15.3196*
60.44	150.189*	102.055*	49.9496*	15.7524*
60.54	154.035*	103.911*	50.8154*	16.2259*
60.64	157.414*	105.298*	51.6372*	16.6759*
60.74	160.401*	106.363*	52.0334*	16.7978*
60.84	163.598*	107.599*	52.5208*	16.9673*
60.94	166.303*	108.607*	52.7106*	17.0657*
61.04	168.449*	109.494*	53.006*	17.1611*
61.14	170.596*	110.296*	53.2966*	17.222*
61.24	172.744*	110.824*	53.5684*	17.2962*
61.34	174.457*	111.49*	53.7802*	17.3322*
61.44	175.977*	112.085*	53.9598*	17.3188*
61.54	177.592*	112.635*	54.084*	17.2845*
61.64	179.075*	113.083*	54.1107*	17.1782*
61.74	180.46*	113.353*	54.0942*	17.104*
61.84	181.452*	113.542*	54.0755*	16.9587*
61.94	182.43*	113.734*	54.0239*	16.7946*
62.04	183.233*	113.892*	53.9606*	16.5954*
62.14	184.103*	114.039*	53.8348*	16.3993*
62.24	184.664*	114.205*	53.6825*	16.1774*
62.34	185.095*	114.296*	53.495*	15.9267*
62.44	185.662*	114.218*	53.2286*	15.6813
62.54	186.105*	114.134*	52.963*	15.4173
62.64	186.289*	114.12*	52.674*	15.1431
62.74	186.567*	114.04*	52.4114*	14.9072
62.84	186.654*	113.847*	52.1028*	14.6243
62.94	186.611*	113.648*	51.7747*	14.3095
63.04	186.469*	113.406*	51.4232*	14.0009
63.14	186.354*	113.117*	51.0317*	13.7392
63.24	186.048*	112.74*	50.5505*	13.4095
63.34	185.942*	112.384*	50.0856*	13.0751
63.44	185.559*	112.009*	49.6208*	12.7571
63.54	185.142*	111.638*	49.1208*	12.4329
63.64	184.789*	111.163*	48.6403*	12.1111
63.74	184.271*	110.605*	48.152*	11.7571
63.84	183.696*	110.042*	47.6677*	11.4454
63.94	183.036*	109.467*	47.1301	11.0892
64.04	182.364*	108.964*	46.5536	10.7571
64.14	181.692*	108.48*	45.9598	10.4267
64.24	180.95*	107.954*	45.3926	10.0853
64.34	180.189*	107.352*	44.8223	9.78137
64.44	179.325*	106.662*	44.2372	9.45013
64.54	178.425*	105.964*	43.6418	9.1087
64.64	177.571*	105.192*	43.0458	8.78998
64.74	176.747*	104.42*	42.3872	8.45868
64.84	175.774*	103.718*	41.752	8.15717
64.94	174.91*	102.971*	41.1177	7.83917
65.04	173.985*	102.15*	40.4543	7.56104
65.14	173.01*	101.378*	39.7982	7.25873
65.24	171.874*	100.588*	39.1419	6.92902
65.34	170.841*	99.7345*	38.4841	6.62512
65.44	169.838*	98.8173*	37.8216	6.32745
65.54	168.762*	97.9041*	37.1653	6.03918
65.64	167.575*	97.0556*	36.5052	5.75403
65.74	166.464*	96.1329*	35.8568	5.45325
65.84	165.35*	95.2259	35.2302	5.18292
65.94	164.224*	94.3845	34.5958	4.90247
66.04	163.057*	93.5743	33.9684	4.61261
66.14	161.903*	92.7166	33.3176	4.30713
66.24	160.657*	91.7845	32.6958	4.02356
66.34	159.485*	90.8181	32.063	3.74933
66.44	158.331*	89.8751	31.4606	3.49933
66.54	157.136*	88.9423	30.8684	3.25403
66.64	155.908*	87.9869	30.2419	2.99933
66.74	154.616*	87.0471	29.6185	2.76263
66.84	153.342*	86.1002	29.0286	2.51416
66.94	152.103*	85.0908	28.4138	2.26416
67.04	150.897*	84.0876	27.7888	2.00873
67.14	149.66*	83.0782	27.2036	1.76575
67.24	148.45*	82.0829	26.6247	1.54932
67.34	147.203*	81.0759	26.0161	1.31653
67.44	145.957*	80.072	25.4067	1.11261
67.54	144.731*	79.0947	24.8216	0.879028
67.64	143.491*	78.0978	24.2927	0.650879
67.74	142.237*	77.1025	23.7349	0.445435
67.84	140.964*	76.0751	23.1771	0.230591
67.94	139.795*	75.0782	22.6473	0.0305786
68.04	138.585*	74.0814	22.106	-0.153809
68.14	137.381*	73.0986	21.57	-0.360046
68.24	136.176*	72.136	21.0458	-0.532715
68.34	134.896	71.1408	20.5013	-0.713135
68.44	133.697	70.1572	19.9888	-0.89209
68.54	132.503	69.1635	19.4771	-1.04675
68.64	131.298	68.1985	18.9528	-1.23193
68.7401	130.075	67.2111	18.4645	-1.3819
68.84	128.8	66.2845	17.9575	-1.56396
68.94	127.528	65.3666	17.4771	-1.73113
69.04	126.27	64.4267	17.0005	-1.88269
69.14	125.057	63.4954	16.527	-2.05225
69.2401	123.878	62.5424	16.0692	-2.19989
69.34	122.657	61.5931	15.6193	-2.35065
69.44	121.468	60.6392	15.1786	-2.5163
69.54	120.328	59.6993	14.7388	-2.6405
69.64	119.126	58.7556	14.3114	-2.77881
69.7401	117.902	57.8712	13.8872	-2.91473
69.84	116.831	57.0298	13.4528	-3.03973
69.94	115.752	56.1283	13.0278	-3.14441
70.04	114.632	55.2291	12.5981	-3.2616
70.14	113.464	54.3423	12.1786	-3.36084
70.2401	112.307	53.4791	11.7661	-3.46552
70.34	111.123	52.6181	11.3403	-3.58972
70.44	109.916	51.7869	10.9271	-3.70068
70.54	108.735	50.9415	10.5348	-3.78033
70.64	107.543	50.0486	10.1317	-3.87256
70.7401	106.371	49.1822	9.76141	-3.96631
70.84	105.264	48.3439	9.39892	-4.05768
70.94	104.145	47.5556	9.04267	-4.15381
71.04	103.075	46.7642	8.68017	-4.23895
71.14	101.99	45.9681	8.32391	-4.31238
71.2401	100.839	45.1501	7.97156	-4.41632
71.34	99.7159	44.3783	7.61456	-4.49597
71.44	98.6441	43.565	7.2583	-4.55457
71.54	97.5308	42.7908	6.91296	-4.6452
71.64	96.3949	42.0306	6.58564	-4.73035
71.7401	95.3167	41.2924	6.24579	-4.79834
71.84	94.2839	40.5087	5.93328	-4.85303
71.94	93.2362	39.7494	5.61457	-4.92566
72.04	92.1854	38.9939	5.30359	-4.98505
72.14	91.1253	38.2767	5.0083	-5.0202
72.2401	90.0855	37.5837	4.70672	-5.07098
72.34	89.0347	36.8627	4.39423	-5.11627
72.44	87.991	36.1345	4.10205	-5.18115
72.54	86.9339	35.44	3.81141	-5.22723
72.64	85.8893	34.7525	3.53955	-5.2663
72.7401	84.8448	34.0509	3.2489	-5.31396
72.84	83.8128	33.351	2.99579	-5.35535
72.94	82.7847	32.6713	2.71613	-5.40222
73.04	81.7714	32.0017	2.44812	-5.44287
73.14	80.7488	31.4088	2.20282	-5.49677
73.2401	79.7332	30.7798	1.95831	-5.54285
73.34	78.7574	30.1588	1.73487	-5.60614
73.44	77.8019	29.533	1.51452	-5.6452
73.54	76.8222	28.9048	1.27704	-5.67334
73.64	75.8276	28.3111	1.0661	-5.70612
73.7401	74.8347	27.6736	0.847352	-5.75616
73.84	73.8917	27.0767	0.612974	-5.80457
73.94	72.937	26.447	0.376284	-5.84363
74.04	71.9831	25.8158	0.159847	-5.87097
74.14	71.0128	25.2275	-0.0354614	-5.89209
74.2401	70.0831	24.6423	-0.227661	-5.92804
74.34	69.1901	24.0455	-0.457336	-5.95691
74.44	68.2784	23.4705	-0.663574	-6.01239
74.54	67.3784	22.9056	-0.827642	-6.01862
74.64	66.4659	22.3376	-0.997192	-6.05304
74.7401	65.6003	21.7877	-1.17609	-6.05927
74.84	64.7175	21.2408	-1.35889	-6.09674
74.94	63.8292	20.6845	-1.52844	-6.11084
75.04	62.9269	20.1736	-1.69091	-6.13269
75.14	62.062	19.6713	-1.84406	-6.15692
75.2401	61.1738	19.1392	-2.03388	-6.16864
75.34	60.298	18.615	-2.20813	-6.18115
75.44	59.4503	18.1345	-2.35187	-6.203
75.54	58.6066	17.6228	-2.52844	-6.23193
75.64	57.7597	17.1517	-2.69091	-6.23895
75.7401	56.9316	16.6931	-2.83234	-6.25378
75.84	56.076	16.2126	-2.98938	-6.2663
75.94	55.248	15.7408	-3.12842	-6.27411
76.04	54.4191	15.2798	-3.27215	-6.28894
76.14	53.6183	14.8259	-3.39252	-6.28271
76.2401	52.7996	14.3861	-3.50732	-6.28894
76.34	52.0449	13.9595	-3.60889	-6.28583
76.44	51.2941	13.5126	-3.72766	-6.28583
76.54	50.5128	13.0689	-3.83545	-6.29364
76.64	49.7167	12.6548	-3.96125	-6.30847
76.7401	48.9659	12.2119	-4.06751	-6.32257
76.84	48.1847	11.7916	-4.17608	-6.3288
76.94	47.4378	11.3728	-4.27374	-6.34052
77.04	46.6777	10.94	-4.39013	-6.36786
77.14	45.9035	10.5103	-4.48467	-6.37018
77.2401	45.1339	10.0876	-4.56281	-6.36084
77.34	44.3956	9.66107	-4.66437	-6.36395
77.44	43.6566	9.29156	-4.76904	-6.38428
77.54	42.9589	8.8736	-4.8714	-6.3858
77.64	42.2831	8.47437	-4.97687	-6.39209
77.7401	41.5902	8.11499	-5.05969	-6.396
77.84	40.8769	7.78998	-5.13703	-6.39441
77.94	40.1925	7.42206	-5.20575	-6.40533
78.04	39.5081	7.06653	-5.28155	-6.41632
78.14	38.83	6.7525	-5.35187	-6.42175
78.2401	38.1652	6.39783	-5.43701	-6.43738
78.34	37.505	6.047	-5.52845	-6.45068
78.44	36.8378	5.70953	-5.6253	-6.4624
78.54	36.1964	5.36969	-5.68701	-6.46472
78.64	35.5511	5.04388	-5.72767	-6.45068
78.7401	34.9074	4.73297	-5.80499	-6.453
78.84	34.2745	4.42047	-5.85889	-6.4577
78.94	33.6261	4.11188	-5.92608	-6.47253
79.04	32.9925	3.78528	-5.98938	-6.47412
79.14	32.3527	3.45093	-6.0589	-6.47723
79.2401	31.7206	3.14862	-6.14325	-6.50378
79.34	31.1136	2.87201	-6.1886	-6.49286
79.44	30.4808	2.58063	-6.23468	-6.50848
79.54	29.8613	2.28687	-6.26904	-6.51318
79.64	29.2589	2.04156	-6.31982	-6.51862
79.7401	28.6839	1.7525	-6.38312	-6.5163
79.84	28.0753	1.46185	-6.4253	-6.50146
79.94	27.4808	1.18219	-6.46594	-6.5116
80.04	26.923	0.930603	-6.51593	-6.51318
80.14	26.3714	0.685303	-6.55109	-6.50537
80.2401	25.8027	0.440002	-6.60888	-6.5069
80.34	25.2394	0.201721	-6.6214	-6.50146
80.44	24.7058	-0.0498657	-6.68158	-6.49988
80.54	24.1534	-0.290466	-6.72687	-6.49365
80.64	23.6113	-0.525635	-6.76435	-6.49518
80.7401	23.0753	-0.770935	-6.8128	-6.50146
80.84	22.5628	-0.975647	-6.82062	-6.49677
80.94	22.0433	-1.20532	-6.86358	-6.50146
81.04	21.541	-1.38031	-6.90265	-6.5069
81.14	21.0167	-1.61859	-6.95343	-6.51788
81.2401	20.4964	-1.82251	-6.99249	-6.5116
81.34	19.9777	-2.02173	-7.03546	-6.5116
81.44	19.4777	-2.22797	-7.0495	-6.5163
81.54	19.0019	-2.42407	-7.09876	-6.5116
81.64	18.5269	-2.61157	-7.1214	-6.50616
81.7401	18.0511	-2.78345	-7.14483	-6.5116
81.84	17.6019	-2.9483	-7.14954	-6.49835
81.94	17.1082	-3.16077	-7.18231	-6.50378
82.04	16.6331	-3.37329	-7.21594	-6.50378
82.14	16.1761	-3.52643	-7.2425	-6.50067
82.2401	15.7011	-3.72327	-7.26904	-6.50848
82.34	15.2698	-3.8811	-7.29327	-6.50378
82.44	14.8409	-4.04126	-7.29639	-6.48975
82.54	14.4065	-4.17487	-7.30268	-6.47723
82.64	13.9456	-4.32562	-7.34717	-6.48193
82.7401	13.5167	-4.51392	-7.36828	-6.48425
82.84	13.0862	-4.66547	-7.38153	-6.47253
82.94	12.6495	-4.81079	-7.39093	-6.45691
83.04	12.2105	-4.97565	-7.40655	-6.4632
83.14	11.7902	-5.13031	-7.42688	-6.46552
83.2401	11.38	-5.23737	-7.42999	-6.4538
83.34	11.0042	-5.38342	-7.45343	-6.4577
83.44	10.6105	-5.52173	-7.45655	-6.453
83.54	10.223	-5.68188	-7.46515	-6.44287
83.64	9.84875	-5.79126	-7.45813	-6.43347
83.7401	9.45343	-5.90533	-7.48468	-6.43115
83.84	9.08234	-6.0686	-7.49951	-6.42566
83.94	8.70734	-6.17328	-7.51593	-6.42334
84.04	8.36437	-6.27094	-7.50892	-6.41394
84.14	8.0019	-6.37799	-7.52374	-6.39911
84.2401	7.66126	-6.52014	-7.54169	-6.3905
84.34	7.29797	-6.58032	-7.555	-6.39209
84.44	6.90967	-6.70612	-7.56439	-6.39911
84.54	6.57452	-6.83423	-7.57764	-6.3905
84.64	6.20814	-6.88812	-7.58544	-6.38037
84.7401	5.86359	-6.9436	-7.58704	-6.36316
84.84	5.49408	-7.05609	-7.59716	-6.35614
84.94	5.13311	-7.18268	-7.59095	-6.35303
85.04	4.80969	-7.25922	-7.59718	-6.34363
85.14	4.46827	-7.36548	-7.60577	-6.33661
85.2401	4.14953	-7.4436	-7.59717	-6.32489
85.34	3.81671	-7.58032	-7.62219	-6.328
85.44	3.48938	-7.67407	-7.64013	-6.3288
85.54	3.17609	-7.73969	-7.65735	-6.32489
85.64	2.8722	-7.82562	-7.64794	-6.30536
85.7401	2.57923	-7.90454	-7.64953	-6.29443
85.84	2.29248	-7.97565	-7.65967	-6.28113
85.94	2.00891	-8.04828	-7.66437	-6.28271
86.04	1.72607	-8.12018	-7.66437	-6.28271
86.14	1.44172	-8.19751	-7.68078	-6.29675
86.2401	1.15735	-8.25922	-7.69092	-6.28113
86.34	0.899538	-8.31781	-7.70343	-6.28583
86.44	0.637815	-8.36548	-7.69873	-6.28192
86.54	0.351868	-8.41156	-7.70343	-6.27332
86.64	0.0909495	-8.47095	-7.70812	-6.25146
86.7401	-0.16846	-8.55298	-7.70655	-6.24677
86.84	-0.464538	-8.63892	-7.70813	-6.24677
86.94	-0.737977	-8.71002	-7.72296	-6.24365
87.04	-0.991089	-8.75922	-7.7417	-6.24597
87.14	-1.26922	-8.84204	-7.74639	-6.23425
87.2401	-1.51843	-8.90063	-7.73938	-6.22021
87.34	-1.76532	-8.96313	-7.74951	-6.22253
87.44	-1.9989	-9.03656	-7.75732	-6.21552
87.54	-2.22315	-9.12329	-7.75892	-6.21161
87.64	-2.45203	-9.1983	-7.76593	-6.2077
87.7401	-2.66296	-9.27094	-7.76122	-6.21631
87.84	-2.88641	-9.29907	-7.75891	-6.19519
87.94	-3.10749	-9.36157	-7.75653	-6.17877
88.04	-3.32081	-9.39282	-7.7558	-6.16632
88.14	-3.53094	-9.46704	-7.77764	-6.16394
88.2401	-3.72547	-9.48267	-7.78076	-6.15381
88.34	-3.90436	-9.53186	-7.79169	-6.15222
88.44	-4.11767	-9.60455	-7.79797	-6.16003
88.54	-4.30671	-9.63812	-7.78858	-6.15692
88.64	-4.49579	-9.66235	-7.79327	-6.15692
88.7401	-4.695	-9.68579	-7.79015	-6.15381
88.84	-4.87781	-9.67719	-7.77686	-6.13739
88.94	-5.05908	-9.71783	-7.78625	-6.1452
89.04	-5.24579	-9.73737	-7.78156	-6.1452
89.14	-5.42859	-9.77716	-7.79169	-6.14911
89.2401	-5.63953	-9.83502	-7.81049	-6.14911
89.34	-5.82861	-9.86157	-7.81982	-6.15222
89.44	-6.01063	-9.8811	-7.81751	-6.13037
89.54	-6.20123	-9.90375	-7.83075	-6.1405
89.64	-6.38721	-9.93658	-7.83704	-6.1452
89.7401	-6.55127	-9.97565	-7.84405	-6.15851
89.84	-6.71295	-10.0483	-7.85187	-6.14752
89.94	-6.91065	-10.1038	-7.84717	-6.1452
90.04	-7.04657	-10.1741	-7.85345	-6.15851
90.14	-7.19342	-10.2084	-7.8667	-6.14752
90.2401	-7.36297	-10.2553	-7.87841	-6.16473
90.34	-7.49969	-10.2725	-7.86908	-6.1546
90.44	-7.64423	-10.303	-7.87061	-6.15613
90.54	-7.78174	-10.3491	-7.88	-6.14911
90.64	-7.92077	-10.3546	-7.87842	-6.1405
90.7401	-8.0528	-10.3834	-7.87372	-6.13739
90.84	-8.21222	-10.4366	-7.8808	-6.1452
90.94	-8.35669	-10.4788	-7.87842	-6.14832
91.04	-8.49658	-10.5006	-7.89093	-6.1499
91.14	-8.66375	-10.5194	-7.89093	-6.1452
91.2401	-8.78015	-10.5452	-7.88782	-6.13348
91.34	-8.89892	-10.5647	-7.89794	-6.14209
91.44	-9.01062	-10.5912	-7.89173	-6.12488
91.54	-9.15125	-10.6069	-7.89014	-6.12958
91.64	-9.28094	-10.5999	-7.8753	-6.12097
91.7401	-9.41144	-10.6163	-7.8761	-6.10382
91.84	-9.54498	-10.6311	-7.88623	-6.11786
91.94	-9.66846	-10.6624	-7.89093	-6.12097
92.04	-9.80359	-10.6663	-7.89954	-6.11475
92.14	-9.92547	-10.7084	-7.90185	-6.11005
92.2401	-10.0184	-10.7256	-7.88781	-6.10144
92.34	-10.1442	-10.7545	-7.88544	-6.09833
92.44	-10.2606	-10.7686	-7.89795	-6.09833
92.54	-10.3872	-10.803	-7.88862	-6.09442
92.64	-10.5075	-10.8264	-7.89483	-6.09521
92.7401	-10.6169	-10.8373	-7.89484	-6.0741
92.84	-10.7247	-10.8616	-7.89325	-6.08191
92.94	-10.8161	-10.8928	-7.90423	-6.0788
93.04	-10.9372	-10.9241	-7.90185	-6.08661
93.14	-11.038	-10.9553	-7.91436	-6.09833
93.2401	-11.1395	-10.9662	-7.90967	-6.08661
93.34	-11.2271	-11.01	-7.92688	-6.09442
93.44	-11.3208	-11.046	-7.93701	-6.10303
93.54	-11.3926	-11.0725	-7.92689	-6.08191
93.64	-11.4771	-11.0842	-7.92688	-6.07959
93.7401	-11.5825	-11.1038	-7.9378	-6.0835
93.84	-11.6544	-11.1147	-7.93231	-6.08191
93.94	-11.7419	-11.1537	-7.94171	-6.08191
94.04	-11.8356	-11.1624	-7.9386	-6.07489
94.14	-11.9255	-11.1796	-7.92218	-6.07648
94.2401	-12.0153	-11.1967	-7.9386	-6.0741
94.34	-12.12	-11.2131	-7.93621	-6.06238
94.44	-12.2098	-11.2327	-7.9253	-6.06708
94.54	-12.2809	-11.2358	-7.92688	-6.06238
94.64	-12.3755	-11.2483	-7.92298	-6.05304
94.7401	-12.4598	-11.2764	-7.93701	-6.05536
94.84	-12.5349	-11.2866	-7.9386	-6.04285
94.94	-12.6169	-11.3077	-7.9292	-6.04755
95.04	-12.6864	-11.3092	-7.92219	-6.03894
95.14	-12.7614	-11.3303	-7.93701	-6.04834
95.2401	-12.8114	-11.3467	-7.92529	-6.03113
95.34	-12.856	-11.3499	-7.91987	-6.02881
95.44	-12.9169	-11.3795	-7.93231	-6.03894
95.54	-12.9794	-11.3858	-7.92688	-6.04053
95.64	-13.0427	-11.3928	-7.92218	-6.01941
95.7401	-13.113	-11.4084	-7.92999	-6.02881
95.84	-13.1802	-11.4163	-7.93078	-6.02332
95.94	-13.2388	-11.4249	-7.92218	-6.021
96.04	-13.3036	-11.4584	-7.93078	-6.0249
96.14	-13.3466	-11.4592	-7.93701	-6.01941
96.2401	-13.4255	-11.4749	-7.94873	-6.0116
96.34	-13.5005	-11.4827	-7.95343	-6.00928
96.44	-13.5559	-11.4936	-7.94952	-6.01941
96.54	-13.6286	-11.5342	-7.96124	-6.021
96.64	-13.6849	-11.553	-7.96124	-6.01318
96.7401	-13.7372	-11.5694	-7.96594	-6.0116
96.84	-13.8075	-11.5905	-7.97138	-6.00769
96.94	-13.8755	-11.5999	-7.98236	-6.01398
97.04	-13.945	-11.628	-7.97998	-6.0155
97.14	-14.0059	-11.6412	-7.98468	-6.0116
97.2401	-14.0669	-11.6483	-7.98078	-6.00928
97.34	-14.12	-11.6772	-7.9956	-6.021
97.44	-14.1771	-11.6788	-7.99408	-6.01318
97.54	-14.2364	-11.6905	-8.00421	-6.0155
97.64	-14.2927	-11.7037	-8.00262	-6.0116
97.7401	-14.3466	-11.7092	-7.99719	-5.99988
97.84	-14.4153	-11.7296	-7.99249	-5.98975
97.94	-14.4551	-11.7327	-7.9925	-5.98193
98.04	-14.4919	-11.7475	-8.00891	-5.97723
98.14	-14.5349	-11.7491	-7.99951	-5.97253
98.2401	-14.6083	-11.774	-8.00262	-5.98035
98.34	-14.652	-11.7811	-8.00971	-5.97491
98.44	-14.6911	-11.8178	-8.01202	-5.98895
98.54	-14.7231	-11.8178	-8.01593	-5.98425
98.64	-14.7707	-11.8303	-8.01904	-5.98035
98.7401	-14.82	-11.8303	-8.01514	-5.98193
98.84	-14.8724	-11.842	-8.02142	-5.98975
98.94	-14.8973	-11.8546	-8.01514	-5.98035
99.04	-14.9302	-11.8616	-8.01673	-5.9671
99.14	-14.9911	-11.8811	-8.03546	-5.97955
99.2401	-15.0544	-11.903	-8.03857	-5.97723
99.34	-15.0591	-11.8983	-8.03626	-5.97333
99.44	-15.0989	-11.9108	-8.04638	-5.96552
99.54	-15.1403	-11.9288	-8.05499	-5.97723
99.64	-15.1599	-11.9272	-8.03156	-5.96082
99.7401	-15.1958	-11.9413	-8.03937	-5.9585
99.84	-15.2067	-11.9506	-8.04016	-5.9624
99.94	-15.2606	-11.9584	-8.05029	-5.96783
100.04	-15.3122	-11.9545	-8.04639	-5.9538
100.14	-15.3708	-11.9686	-8.05268	-5.97021
100.24	-15.4138	-11.978	-8.06281	-5.97412
100.34	-15.4559	-11.9905	-8.07294	-5.97565
100.44	-15.5067	-11.9975	-8.07062	-5.96082
100.54	-15.5817	-12.0069	-8.07452	-5.9624
100.64	-15.613	-12.017	-8.0628	-5.9577
100.74	-15.6693	-12.0178	-8.0589	-5.9538
100.84	-15.7247	-12.046	-8.0675	-5.95068
100.94	-15.7661	-12.0444	-8.05109	-5.94128
101.04	-15.8239	-12.0413	-8.06592	-5.93427
101.14	-15.8591	-12.0507	-8.0722	-5.94366
101.24	-15.9138	-12.0483	-8.06982	-5.93347
101.34	-15.945	-12.0616	-8.05969	-5.93817
101.44	-15.9677	-12.0514	-8.05341	-5.92175
101.54	-15.9958	-12.0483	-8.06281	-5.90692
101.64	-16.0348	-12.0624	-8.05969	-5.92334
101.74	-16.0739	-12.0647	-8.05109	-5.91394
101.84	-16.1208	-12.0709	-8.06122	-5.90692
101.94	-16.1739	-12.0803	-8.04798	-5.90692
102.04	-16.22	-12.0819	-8.04328	-5.8952
102.14	-16.2684	-12.0991	-8.05108	-5.8952
102.24	-16.2935	-12.1006	-8.05187	-5.896
102.34	-16.3176	-12.1022	-8.04169	-5.88269
102.44	-16.3591	-12.1038	-8.04797	-5.8905
102.54	-16.395	-12.0952	-8.03156	-5.88348
102.64	-16.4263	-12.1093	-8.03937	-5.88818
102.74	-16.4567	-12.1186	-8.04328	-5.88739
102.84	-16.502	-12.1186	-8.04168	-5.88739
102.94	-16.5309	-12.1077	-8.04407	-5.87878
103.04	-16.5669	-12.1358	-8.03936	-5.88818
103.14	-16.6005	-12.1428	-8.04015	-5.88428
103.24	-16.6177	-12.1459	-8.02686	-5.87097
103.34	-16.6669	-12.1553	-8.03155	-5.87567
103.44	-16.695	-12.1741	-8.02845	-5.87488
103.54	-16.7114	-12.1936	-8.04016	-5.87256
103.64	-16.738	-12.2131	-8.04247	-5.88428
103.74	-16.7606	-12.2178	-8.04327	-5.87488
103.84	-16.7849	-12.2202	-8.04016	-5.86786
103.94	-16.8192	-12.2436	-8.0534	-5.87567
104.04	-16.8466	-12.2405	-8.03467	-5.85925
104.14	-16.8708	-12.26	-8.02454	-5.85223
104.24	-16.9067	-12.2717	-8.03937	-5.85223
104.34	-16.9286	-12.2795	-8.04639	-5.86084
104.44	-16.9442	-12.2913	-8.03937	-5.85144
104.54	-16.9724	-12.2913	-8.03626	-5.83661
104.64	-16.9966	-12.3061	-8.03857	-5.84442
104.74	-17.0184	-12.3186	-8.01984	-5.83972
104.84	-17.0356	-12.335	-8.03625	-5.82959
104.94	-17.0528	-12.3569	-8.03156	-5.82489
105.04	-17.07	-12.3663	-8.04327	-5.8327
105.14	-17.0934	-12.3569	-8.04327	-5.82019
105.24	-17.1177	-12.3764	-8.05499	-5.82489
105.34	-17.1544	-12.378	-8.05029	-5.8335
105.44	-17.1685	-12.3811	-8.03938	-5.81238
105.54	-17.1981	-12.3959	-8.04639	-5.81317
105.64	-17.2271	-12.3936	-8.03626	-5.82178
105.74	-17.2536	-12.4124	-8.04407	-5.81708
105.84	-17.2848	-12.4288	-8.0628	-5.81396
105.94	-17.3114	-12.4194	-8.0503	-5.80927
106.04	-17.3434	-12.4241	-8.05188	-5.81628
106.14	-17.3599	-12.4389	-8.04327	-5.79755
106.24	-17.3942	-12.4366	-8.03858	-5.79755
106.34	-17.4239	-12.4545	-8.04639	-5.80847
106.44	-17.4614	-12.46	-8.05579	-5.81708
106.54	-17.4794	-12.4537	-8.05811	-5.79755
106.64	-17.5184	-12.4678	-8.0628	-5.80927
106.74	-17.5427	-12.4662	-8.05579	-5.79755
106.84	-17.5622	-12.4631	-8.06281	-5.80066
106.94	-17.5966	-12.4709	-8.06281	-5.79053
107.04	-17.6255	-12.4905	-8.07061	-5.81006
107.14	-17.6325	-12.4952	-8.0675	-5.80536
107.24	-17.6489	-12.4975	-8.06671	-5.80457
107.34	-17.6708	-12.5022	-8.06982	-5.79755
107.44	-17.702	-12.5069	-8.06982	-5.80225
107.54	-17.7028	-12.5217	-8.07062	-5.80927
107.64	-17.7263	-12.5287	-8.07922	-5.80457
107.74	-17.7458	-12.5303	-8.07452	-5.80536
107.84	-17.7536	-12.5405	-8.08233	-5.81396
107.94	-17.7684	-12.5381	-8.06593	-5.79755
108.04	-17.7809	-12.5366	-8.07062	-5.80457
108.14	-17.82	-12.5475	-8.08155	-5.80377
108.24	-17.8497	-12.5655	-8.08624	-5.79834
108.34	-17.856	-12.5561	-8.08704	-5.79755
108.44	-17.8942	-12.5577	-8.08234	-5.79755
108.54	-17.9099	-12.546	-8.08704	-5.79364
108.64	-17.9411	-12.5483	-8.09717	-5.79364
108.74	-17.9575	-12.5561	-8.09014	-5.79364
108.84	-17.9794	-12.5577	-8.09406	-5.79443
108.94	-18.0106	-12.5647	-8.09875	-5.78503
109.04	-18.0357	-12.5647	-8.08936	-5.7663
109.14	-18.0661	-12.5678	-8.09015	-5.78271
109.24	-18.0856	-12.5624	-8.07922	-5.7749
109.34	-18.0981	-12.5717	-8.07452	-5.77332
109.44	-18.1364	-12.5694	-8.07452	-5.7663
109.54	-18.1614	-12.5826	-8.09247	-5.78113
109.64	-18.1802	-12.5842	-8.09563	-5.77802
109.74	-18.1911	-12.5803	-8.07763	-5.75458
109.84	-18.2263	-12.5756	-8.07764	-5.75848
109.94	-18.2489	-12.5889	-8.07452	-5.7663
110.04	-18.2536	-12.5756	-8.05579	-5.74988
110.14	-18.2778	-12.5897	-8.05109	-5.74756
110.24	-18.2997	-12.5912	-8.05499	-5.75537
110.34	-18.327	-12.6069	-8.06121	-5.75378
110.44	-18.3317	-12.6046	-8.05579	-5.74988
110.54	-18.3466	-12.6139	-8.05811	-5.74286
110.64	-18.363	-12.6085	-8.04798	-5.74365
110.74	-18.3872	-12.6116	-8.05499	-5.74365
110.84	-18.3942	-12.6085	-8.05109	-5.73895
110.94	-18.4059	-12.6069	-8.05109	-5.74677
111.04	-18.4317	-12.6116	-8.0628	-5.7569
111.14	-18.4536	-12.6069	-8.0542	-5.74286
111.24	-18.4724	-12.6163	-8.05579	-5.73975
111.34	-18.52	-12.6264	-8.0675	-5.74677
111.44	-18.5294	-12.6194	-8.06592	-5.74677
111.54	-18.5427	-12.6264	-8.06983	-5.73895
111.64	-18.5575	-12.6241	-8.06281	-5.74207
111.74	-18.5864	-12.6428	-8.07062	-5.73975
111.84	-18.5981	-12.6506	-8.07922	-5.74207
111.94	-18.613	-12.6506	-8.07063	-5.72333
112.04	-18.6247	-12.6475	-8.08234	-5.73193
112.14	-18.6442	-12.6624	-8.08234	-5.73975
112.24	-18.6677	-12.6545	-8.08233	-5.73895
112.34	-18.6739	-12.653	-8.07373	-5.73035
112.44	-18.6958	-12.6671	-8.08703	-5.74207
112.54	-18.7145	-12.6772	-8.08234	-5.73193
112.64	-18.7294	-12.6671	-8.08154	-5.72723
112.74	-18.7458	-12.6694	-8.08234	-5.72253
112.84	-18.7536	-12.6788	-8.09093	-5.72723
112.94	-18.7684	-12.6694	-8.07764	-5.7124
113.04	-18.7856	-12.6702	-8.08392	-5.7077
113.14	-18.8044	-12.6749	-8.07764	-5.7038
113.24	-18.8075	-12.6772	-8.07763	-5.71552
113.34	-18.8317	-12.6772	-8.07373	-5.7077
113.44	-18.8434	-12.6702	-8.07532	-5.703
113.54	-18.8387	-12.6788	-8.06983	-5.68817
113.64	-18.8607	-12.6936	-8.07532	-5.69598
113.74	-18.8981	-12.7084	-8.08233	-5.69287
113.84	-18.8973	-12.6944	-8.07453	-5.67645
113.94	-18.9169	-12.7162	-8.06592	-5.68658
114.04	-18.9138	-12.7249	-8.07062	-5.68427
114.14	-18.9294	-12.7139	-8.07532	-5.67413
114.24	-18.9528	-12.728	-8.07452	-5.67645
114.34	-18.9692	-12.7256	-8.07061	-5.68347
114.44	-18.9895	-12.735	-8.07294	-5.67175
114.54	-19.0083	-12.7405	-8.07531	-5.67645
114.64	-19.0192	-12.7499	-8.07532	-5.66943
114.74	-19.0427	-12.7592	-8.07763	-5.68115
114.84	-19.0505	-12.7436	-8.07062	-5.66473
114.94	-19.0591	-12.7499	-8.07532	-5.66864
115.04	-19.0919	-12.7623	-8.08233	-5.67175
115.14	-19.0942	-12.7647	-8.08234	-5.67255
115.24	-19.1161	-12.7748	-8.09015	-5.67255
115.34	-19.1372	-12.7811	-8.10657	-5.68427
115.44	-19.1411	-12.7905	-8.11359	-5.67334
115.54	-19.1505	-12.7748	-8.10029	-5.67175
115.64	-19.1763	-12.7866	-8.10968	-5.67175
115.74	-19.2028	-12.7889	-8.11127	-5.67725
115.84	-19.2145	-12.7983	-8.10577	-5.67645
115.94	-19.2341	-12.803	-8.11279	-5.68506
116.04	-19.2458	-12.8077	-8.09406	-5.66864
116.14	-19.2567	-12.8014	-8.09015	-5.66785
116.24	-19.2762	-12.8038	-8.10187	-5.67255
116.34	-19.2856	-12.8108	-8.09405	-5.67645
116.44	-19.2958	-12.8108	-8.09015	-5.66473
116.54	-19.3091	-12.8147	-8.07764	-5.65692
116.64	-19.3387	-12.7983	-8.08233	-5.65381
116.74	-19.3364	-12.8007	-8.07221	-5.64209
116.84	-19.3434	-12.8178	-8.08233	-5.65692
116.94	-19.3536	-12.8256	-8.08466	-5.65222
117.04	-19.3677	-12.8272	-8.06751	-5.65222
117.14	-19.3747	-12.8256	-8.07062	-5.6452
117.24	-19.3942	-12.8319	-8.07452	-5.64209
117.34	-19.4059	-12.8295	-8.06281	-5.63739
117.44	-19.4185	-12.8295	-8.07452	-5.63739
117.54	-19.4317	-12.8334	-8.07062	-5.62878
117.64	-19.4637	-12.8428	-8.07062	-5.63037
117.74	-19.4818	-12.842	-8.06281	-5.63428
117.84	-19.5106	-12.8616	-8.07452	-5.64911
117.94	-19.5161	-12.8585	-8.06281	-5.63739
118.04	-19.5427	-12.8569	-8.0675	-5.63269
118.14	-19.5614	-12.8538	-8.05029	-5.61786
118.24	-19.5708	-12.8538	-8.05499	-5.61786
118.34	-19.5801	-12.8499	-8.04639	-5.60925
118.44	-19.6107	-12.8616	-8.05108	-5.63037
118.54	-19.6278	-12.8764	-8.0589	-5.63269
118.64	-19.6364	-12.8733	-8.05969	-5.62567
118.74	-19.6309	-12.8928	-8.0581	-5.62878
118.84	-19.645	-12.8959	-8.0589	-5.62177
118.94	-19.6669	-12.8858	-8.0542	-5.62177
119.04	-19.6685	-12.8928	-8.05579	-5.61554
119.14	-19.6755	-12.9006	-8.07452	-5.62097
119.24	-19.6638	-12.8975	-8.0675	-5.61084
119.34	-19.6833	-12.8998	-8.0628	-5.60925
119.44	-19.695	-12.8842	-8.05811	-5.59912
119.54	-19.695	-12.8905	-8.04798	-5.59131
119.64	-19.6997	-12.8998	-8.0628	-5.61005
119.74	-19.7098	-12.8858	-8.05969	-5.59833
119.84	-19.7176	-12.8959	-8.0581	-5.60144
119.94	-19.7294	-12.9077	-8.05499	-5.59833
120.04	-19.7271	-12.9006	-8.04639	-5.58191
120.14	-19.7419	-12.9218	-8.04407	-5.5874
120.24	-19.7505	-12.9194	-8.05499	-5.58661
120.34	-19.7637	-12.9272	-8.0534	-5.58661
120.44	-19.7583	-12.9249	-8.04798	-5.58661
120.54	-19.7684	-12.9319	-8.04327	-5.58661
120.64	-19.7848	-12.9389	-8.04638	-5.58661
120.74	-19.7645	-12.928	-8.02453	-5.57489
120.84	-19.7825	-12.9397	-8.02845	-5.57178
120.94	-19.7997	-12.9366	-8.03546	-5.58191
121.04	-19.7974	-12.9319	-8.02686	-5.56317
121.14	-19.8192	-12.935	-8.03155	-5.56317
121.24	-19.8223	-12.9202	-8.02375	-5.55847
121.34	-19.8364	-12.9319	-8.04327	-5.57489
121.44	-19.8513	-12.9319	-8.03857	-5.57489
121.54	-19.8677	-12.928	-8.03235	-5.56476
121.64	-19.8778	-12.9397	-8.03936	-5.56708
121.74	-19.8825	-12.9514	-8.04016	-5.55927
121.84	-19.8942	-12.9514	-8.03076	-5.55927
121.94	-19.902	-12.9514	-8.02686	-5.55066
122.04	-19.9122	-12.9662	-8.03936	-5.56238
122.14	-19.9224	-12.9639	-8.04407	-5.56787
122.24	-19.938	-12.9678	-8.04328	-5.56708
122.34	-19.9528	-12.978	-8.0581	-5.57178
122.44	-19.9645	-12.9796	-8.05579	-5.56708
122.54	-19.981	-13.0014	-8.05969	-5.57568
122.64	-19.9911	-12.9874	-8.05499	-5.56628
122.74	-19.9989	-12.9975	-8.0581	-5.56238
122.84	-19.9919	-12.9905	-8.04639	-5.55536
122.94	-19.995	-12.9936	-8.04718	-5.56317
123.04	-19.9966	-12.9756	-8.04798	-5.55536
123.14	-20.0184	-12.978	-8.04327	-5.56238
123.24	-20.0325	-12.9835	-8.04407	-5.55304
123.34	-20.0419	-12.9944	-8.03857	-5.54755
123.44	-20.0544	-12.9991	-8.04327	-5.54755
123.54	-20.0661	-13.0061	-8.04327	-5.55927
123.64	-20.077	-12.9975	-8.03546	-5.54285
123.74	-20.0864	-13.0022	-8.03155	-5.53583
123.84	-20.0887	-12.9975	-8.02374	-5.52802
123.94	-20.1099	-13.0022	-8.03235	-5.52802
124.04	-20.1083	-12.9905	-8.01905	-5.5163
124.14	-20.1161	-12.9983	-8.01905	-5.52411
124.24	-20.1255	-13.01	-8.02454	-5.52411
124.34	-20.1395	-12.9991	-8.03545	-5.52802
124.44	-20.1372	-13.0022	-8.01905	-5.5163
124.54	-20.1504	-13.0006	-8.02295	-5.52802
124.64	-20.1685	-13.01	-8.02454	-5.52802
124.74	-20.188	-13.0225	-8.03625	-5.53583
124.84	-20.1864	-13.0295	-8.02686	-5.52411
124.94	-20.1989	-13.0389	-8.03625	-5.54053
125.04	-20.2223	-13.0436	-8.04327	-5.54285
125.14	-20.2372	-13.053	-8.05499	-5.55066
125.24	-20.2349	-13.046	-8.03858	-5.54364
125.34	-20.2614	-13.0608	-8.04407	-5.54523
125.44	-20.2778	-13.0725	-8.0628	-5.54755
125.54	-20.2911	-13.0834	-8.0628	-5.55066
125.64	-20.2958	-13.0999	-8.05811	-5.55066
125.74	-20.3091	-13.1116	-8.06751	-5.56006
125.84	-20.3208	-13.1202	-8.06982	-5.56708
125.94	-20.3192	-13.1116	-8.05109	-5.55225
126.04	-20.3239	-13.1139	-8.0542	-5.55457
126.14	-20.3434	-13.1241	-8.06048	-5.56396
126.24	-20.3434	-13.128	-8.06281	-5.56238
126.34	-20.3544	-13.1342	-8.06591	-5.55536
126.44	-20.3544	-13.1342	-8.06592	-5.55536
126.54	-20.3685	-13.1366	-8.06048	-5.56006
126.64	-20.3864	-13.1264	-8.05811	-5.56238
126.74	-20.3747	-13.1311	-8.05108	-5.56396
126.84	-20.3661	-13.128	-8.04797	-5.54755
126.94	-20.3724	-13.1233	-8.04798	-5.53973
127.04	-20.3934	-13.135	-8.05029	-5.54755
127.14	-20.4012	-13.1334	-8.0581	-5.55768
127.24	-20.3973	-13.1241	-8.04798	-5.54364
127.34	-20.4028	-13.1311	-8.05109	-5.55304
127.44	-20.4106	-13.1428	-8.05499	-5.55457
127.54	-20.4091	-13.1397	-8.04639	-5.53583
127.64	-20.4333	-13.1459	-8.03937	-5.54755
127.74	-20.4356	-13.1381	-8.03545	-5.53973
127.84	-20.4263	-13.1311	-8.01203	-5.53113
127.94	-20.4341	-13.1405	-8.02374	-5.52881
128.04	-20.445	-13.1381	-8.00891	-5.53583
128.14	-20.4481	-13.1389	-8.01202	-5.54053
128.24	-20.4333	-13.1264	-8.01123	-5.52332
128.34	-20.4411	-13.1342	-8.00732	-5.53113
128.44	-20.4481	-13.1241	-7.98859	-5.521
128.54	-20.4481	-13.1194	-7.98468	-5.5116
128.64	-20.4622	-13.1311	-7.98547	-5.5163
128.74	-20.4724	-13.1358	-7.98779	-5.50146
128.84	-20.4724	-13.1264	-7.97766	-5.50458
128.94	-20.4841	-13.1358	-7.97998	-5.5163
129.04	-20.4989	-13.1381	-7.99249	-5.52332
129.14	-20.5013	-13.1327	-7.99408	-5.521
129.24	-20.5106	-13.1303	-7.9917	-5.53271
129.34	-20.5231	-13.1264	-7.98309	-5.53033
129.44	-20.5302	-13.1264	-7.96595	-5.5163
129.54	-20.5278	-13.1319	-7.97766	-5.5257
129.64	-20.5497	-13.1475	-7.97997	-5.53973
129.74	-20.5474	-13.1264	-7.96594	-5.52332
129.84	-20.5419	-13.1202	-7.94873	-5.52802
129.94	-20.5513	-13.1186	-7.95032	-5.52332
130.04	-20.5497	-13.1116	-7.93702	-5.51318
130.14	-20.5489	-13.1116	-7.94482	-5.5116
130.24	-20.5552	-13.1069	-7.9386	-5.5163
130.34	-20.5661	-13.0967	-7.92919	-5.5116
130.44	-20.5505	-13.0967	-7.92688	-5.50616
130.54	-20.5708	-13.0991	-7.92139	-5.50848
130.64	-20.5809	-13.0991	-7.91906	-5.50848
130.74	-20.5786	-13.0967	-7.90265	-5.49677
130.84	-20.5887	-13.0873	-7.90967	-5.50848
130.94	-20.5966	-13.092	-7.91046	-5.5116
131.04	-20.6091	-13.0881	-7.89875	-5.50769
131.14	-20.6239	-13.0952	-7.89404	-5.51239
131.24	-20.6255	-13.0803	-7.89093	-5.50458
131.34	-20.6247	-13.0967	-7.88781	-5.50146
131.44	-20.6161	-13.0834	-7.87452	-5.48035
131.54	-20.6177	-13.0803	-7.8714	-5.47333
131.64	-20.6278	-13.0756	-7.8714	-5.48505
131.74	-20.6356	-13.085	-7.87609	-5.48505
131.84	-20.6333	-13.0639	-7.85968	-5.48193
131.94	-20.6356	-13.0655	-7.8667	-5.47723
132.04	-20.6528	-13.0686	-7.86438	-5.48505
132.14	-20.6684	-13.0725	-7.8706	-5.47723
132.24	-20.6591	-13.0577	-7.84875	-5.47723
132.34	-20.6638	-13.0678	-7.85187	-5.47253
132.44	-20.6669	-13.0577	-7.84717	-5.46552
132.54	-20.6685	-13.0647	-7.83234	-5.4577
132.64	-20.6833	-13.0764	-7.84564	-5.4671
132.74	-20.6802	-13.0678	-7.83154	-5.4577
132.84	-20.7012	-13.0756	-7.83544	-5.47253
132.94	-20.6958	-13.0655	-7.82532	-5.46552
133.04	-20.7059	-13.0686	-7.83234	-5.46552
133.14	-20.7075	-13.0678	-7.81982	-5.46082
133.24	-20.7051	-13.0803	-7.82061	-5.4538
133.34	-20.6958	-13.0772	-7.81592	-5.44208
133.44	-20.7075	-13.085	-7.8136	-5.45538
133.54	-20.7098	-13.0795	-7.80969	-5.44989
133.64	-20.7177	-13.0952	-7.81983	-5.46082
133.74	-20.7388	-13.0967	-7.82452	-5.46552
133.84	-20.7372	-13.092	-7.81592	-5.46552
133.94	-20.7466	-13.0999	-7.8089	-5.46082
134.04	-20.7567	-13.1147	-7.8175	-5.4538
134.14	-20.7489	-13.1116	-7.80499	-5.4577
134.24	-20.7583	-13.1202	-7.80811	-5.4577
134.34	-20.7684	-13.135	-7.80109	-5.46552
134.44	-20.77	-13.1381	-7.80109	-5.46552
134.54	-20.7684	-13.1264	-7.79798	-5.4624
134.64	-20.7778	-13.1272	-7.79327	-5.4577
134.74	-20.7684	-13.128	-7.78857	-5.4577
134.84	-20.7692	-13.1194	-7.77454	-5.44598
134.94	-20.7778	-13.1311	-7.79016	-5.44598
135.04	-20.7763	-13.1389	-7.78156	-5.44598
135.14	-20.7778	-13.1475	-7.78155	-5.44287
135.24	-20.7801	-13.1303	-7.78075	-5.43817
135.34	-20.7692	-13.1311	-7.76202	-5.43347
135.44	-20.7778	-13.128	-7.76904	-5.42645
135.54	-20.788	-13.1311	-7.76984	-5.42175
135.64	-20.7927	-13.1334	-7.76203	-5.42175
135.74	-20.7997	-13.1311	-7.76904	-5.42334
135.84	-20.7841	-13.1342	-7.75501	-5.41473
135.94	-20.8099	-13.1288	-7.755	-5.41473
136.04	-20.8114	-13.135	-7.74951	-5.41864
136.14	-20.8091	-13.1428	-7.7542	-5.41553
136.24	-20.8122	-13.1381	-7.74719	-5.40692
136.34	-20.827	-13.1389	-7.74951	-5.41394
136.44	-20.8286	-13.1506	-7.74249	-5.40381
136.54	-20.8301	-13.1467	-7.7417	-5.39832
136.64	-20.8247	-13.1584	-7.755	-5.41003
136.74	-20.8223	-13.1577	-7.7495	-5.3905
136.84	-20.8161	-13.1467	-7.73388	-5.37177
136.94	-20.8169	-13.1475	-7.73078	-5.37177
137.04	-20.8364	-13.1553	-7.73236	-5.38507
137.14	-20.8387	-13.1577	-7.73077	-5.37567
137.24	-20.8364	-13.1506	-7.73779	-5.38269
137.34	-20.8466	-13.1553	-7.73858	-5.37567
137.44	-20.8434	-13.1498	-7.7425	-5.37256
137.54	-20.8364	-13.1436	-7.74408	-5.36084
137.64	-20.8466	-13.1577	-7.74951	-5.37488
137.74	-20.8513	-13.1655	-7.76513	-5.37878
137.84	-20.8583	-13.1671	-7.75891	-5.38428
137.94	-20.8599	-13.1741	-7.76123	-5.37958
138.04	-20.8466	-13.1655	-7.75031	-5.37097
138.14	-20.856	-13.1671	-7.76203	-5.36395
138.24	-20.863	-13.1624	-7.76672	-5.37726
138.34	-20.8677	-13.1584	-7.77686	-5.36786
138.44	-20.87	-13.1671	-7.76984	-5.37097
138.54	-20.8747	-13.1616	-7.75892	-5.36786
138.64	-20.8926	-13.1655	-7.76905	-5.36627
138.74	-20.895	-13.1788	-7.77686	-5.36395
138.84	-20.909	-13.1694	-7.76672	-5.36084
138.94	-20.9067	-13.1584	-7.76203	-5.35614
139.04	-20.9138	-13.1459	-7.76203	-5.34833
139.14	-20.9333	-13.1522	-7.76673	-5.35614
139.24	-20.9528	-13.1624	-7.78075	-5.35614
139.34	-20.9528	-13.1459	-7.76984	-5.35614
139.44	-20.9606	-13.1475	-7.78156	-5.35303
139.54	-20.9614	-13.1428	-7.77063	-5.34052
139.64	-20.9629	-13.153	-7.77685	-5.35144
139.74	-20.9606	-13.1506	-7.77686	-5.33972
[truncated: 7,208 more rows]

## Sheet: 3D
Time (s)	125	62.5	31.25	15.625	7.8125	3.90625	1.953125
-60.08*	0.765202*	0.944553*	0.520845*	-0.311132*	0.349434*	0.176949*	0.0640602*		excluded data*
-59.98*	0.753483*	0.956272*	0.520845*	-0.322851*	0.349434*	0.176949*	0.0718727*
-59.88*	0.753483*	0.956272*	0.520845*	-0.330664*	0.368966*	0.200386*	0.0718727*
-59.78*	0.757389*	0.967984*	0.544276*	-0.318952*	0.380677*	0.21991*	0.0835843*
-59.68*	0.757389*	0.960178*	0.552095*	-0.318945*	0.368966*	0.231636*	0.0835915*
-59.58*	0.757389*	0.960178*	0.563814*	-0.295507*	0.392403*	0.255074*	0.0953102*
-59.48*	0.741764*	0.960178*	0.563814*	-0.287695*	0.400216*	0.243355*	0.0953102*
-59.38*	0.87067*	0.960178*	0.556002*	-0.268164*	0.404122*	0.243355*	0.0953102*
-59.28*	0.890202*	1.00313*	0.587233*	-0.217402*	0.314259*	0.255054*	0.126541*
-59.18*	0.89333*	0.948455*	0.563814*	-0.214263*	0.326778*	0.212105*	0.0562429*
-59.08*	0.890202*	0.94846*	0.570845*	-0.217382*	0.322091*	0.204292*	0.060936*
-58.98*	0.883167*	0.947678*	0.575533*	-0.217382*	0.322091*	0.192574*	0.0710907*
-58.88*	0.871452*	0.94534*	0.568502*	-0.268939*	0.389279*	0.185543*	0.11953*
-58.78*	0.746449*	0.950822*	0.554458*	-0.30877*	0.371328*	0.192592*	0.0742354*
-58.68*	0.749577*	0.960173*	0.565376*	-0.301764*	0.380684*	0.210543*	0.0835857*
-58.58*	0.749577*	0.94846*	0.573969*	-0.306446*	0.38537*	0.224604*	0.0859337*
-58.48*	0.755825*	0.950796*	0.58334*	-0.286139*	0.405684*	0.243355*	0.0968666*
-58.38*	0.739422*	0.957838*	0.579441*	-0.278317*	0.411936*	0.241013*	0.092968*
-58.28*	0.739422*	0.962519*	0.563813*	-0.258008*	0.415839*	0.241009*	0.0953088*
-58.18*	0.715984*	0.97112*	0.565378*	-0.247067*	0.423655*	0.231638*	0.0914073*
-58.08*	0.697231*	0.966427*	0.568501*	-0.254103*	0.419745*	0.218353*	0.0601521*
-57.98*	0.655827*	0.960193*	0.566955*	-0.258772*	0.405686*	0.213669*	0.0445456*
-57.88*	0.645672*	0.967994*	0.570065*	-0.246285*	0.406466*	0.22773*	0.0406227*
-57.78*	0.630825*	0.958625*	0.566167*	-0.248624*	0.402568*	0.22227*	0.0179758*
-57.68*	0.641762*	0.965652*	0.570845*	-0.231439*	0.40334*	0.230854*	0.033597*
-57.58*	0.642544*	0.954708*	0.550531*	-0.226759*	0.398652*	0.22851*	0.0179653*
-57.48*	0.622234*	0.94379*	0.545862*	-0.231429*	0.393967*	0.225388*	0.00705*
-57.38*	0.626919*	0.964865*	0.564594*	-0.212694*	0.41037*	0.25976*	0.0210896*
-57.28*	0.618328*	0.950041*	0.551332*	-0.217363*	0.40414*	0.262123*	0.00158*
-57.18*	0.593327*	0.925042*	0.528658*	-0.219707*	0.388497*	0.249605*	-0.017951*
-57.08*	0.569885*	0.910957*	0.514595*	-0.227539*	0.386152*	0.246479*	-0.0476589*
-56.98*	0.55817*	0.906291*	0.507585*	-0.228299*	0.367402*	0.250384*	-0.0585756*
-56.88*	0.565983*	0.907072*	0.498972*	-0.249395*	0.361155*	0.250387*	-0.0671883*
-56.78*	0.560513*	0.88364*	0.495868*	-0.257985*	0.333832*	0.245721*	-0.0843549*
-56.68*	0.569111*	0.897687*	0.510691*	-0.240809*	0.319748*	0.280075*	-0.0648355*
-56.58*	0.566761*	0.903927*	0.490376*	-0.242384*	0.293183*	0.281634*	-0.0765667*
-56.48*	0.572231*	0.888318*	0.487267*	-0.256429*	0.293184*	0.298042*	-0.0742049*
-56.38*	0.583172*	0.873469*	0.495848*	-0.235343*	0.293967*	0.315231*	-0.063282*
-56.28*	0.58942*	0.864872*	0.515385*	-0.229093*	0.301005*	0.327738*	-0.0562434*
-56.18*	0.587074*	0.853947*	0.521626*	-0.235332*	0.290059*	0.305073*	-0.0562339*
-56.08*	0.564419*	0.833614*	0.509907*	-0.255665*	0.278339*	0.288666*	-0.0679722*
-55.98*	0.573795*	0.843777*	0.513037*	-0.260347*	0.275216*	0.292574*	-0.0624981*
-55.88*	0.571449*	0.847692*	0.491158*	-0.271277*	0.254902*	0.281635*	-0.0617218*
-55.78*	0.573795*	0.832053*	0.477878*	-0.276755*	0.243967*	0.286325*	-0.0585947*
-55.68*	0.550358*	0.819562*	0.44272*	-0.287686*	0.220528*	0.25898*	-0.0703058*
-55.58*	0.548794*	0.788303*	0.433346*	-0.286133*	0.215059*	0.261324*	-0.0593777*
-55.48*	0.559734*	0.797669*	0.453649*	-0.283797*	0.241623*	0.2707*	-0.02423*
-55.38*	0.559734*	0.775809*	0.427097*	-0.282222*	0.237717*	0.26445*	-0.0179691*
-55.28*	0.529263*	0.750028*	0.413822*	-0.28925*	0.222879*	0.2418*	-0.0249944*
-55.18*	0.538639*	0.758612*	0.423189*	-0.268169*	0.233028*	0.241011*	-0.0101643*
-55.08*	0.52145*	0.739086*	0.401316*	-0.279881*	0.21428*	0.221481*	-0.0203133*
-54.98*	0.529263*	0.740641*	0.404433*	-0.27989*	0.215058*	0.220697*	-0.00626*
-54.88*	0.510517*	0.740655*	0.393503*	-0.287688*	0.206467*	0.211325*	-0.0140629*
-54.78*	0.519108*	0.74533*	0.383342*	-0.290042*	0.202556*	0.216008*	-0.00469*
-54.68*	0.511295*	0.725803*	0.373188*	-0.285353*	0.197089*	0.200384*	0.0039*
-54.58*	0.507389*	0.696117*	0.371628*	-0.319725*	0.181467*	0.196482*	-0.00469*
-54.48*	0.498013*	0.698457*	0.361466*	-0.32598*	0.187714*	0.183197*	0.0039*
-54.38*	0.48708*	0.689078*	0.354441*	-0.313484*	0.202561*	0.190231*	-0.00469*
-54.28*	0.476917*	0.690647*	0.363031*	-0.328322*	0.201776*	0.180852*	-0.00547*
-54.18*	0.489422*	0.696111*	0.384129*	-0.311137*	0.21428*	0.200388*	-0.000789*
-54.08*	0.473797*	0.682835*	0.372408*	-0.313477*	0.208809*	0.19648*	0.00937*
-53.98*	0.45895*	0.667212*	0.364598*	-0.308786*	0.204903*	0.200386*	-0.00469*
-53.88*	0.456608*	0.660176*	0.345062*	-0.308789*	0.209589*	0.187103*	-0.00547*
-53.78*	0.468327*	0.662523*	0.345064*	-0.297852*	0.214278*	0.180073*	-0.00235*
-53.68*	0.465984*	0.66487*	0.340378*	-0.31191*	0.194748*	0.149607*	-0.0148425*
-53.58*	0.449574*	0.657833*	0.345844*	-0.322071*	0.212714*	0.148041*	-0.0171909*
-53.48*	0.448017*	0.647679*	0.33491*	-0.322849*	0.210373*	0.13945*	-0.0148444*
-53.38*	0.447231*	0.655486*	0.351313*	-0.31114*	0.22912*	0.138666*	-0.0195351*
-53.28*	0.448795*	0.659395*	0.354439*	-0.318945*	0.233809*	0.139448*	-0.0257835*
-53.18*	0.452702*	0.664864*	0.378658*	-0.31348*	0.238497*	0.139448*	-0.0101624*
-53.08*	0.430828*	0.650021*	0.356783*	-0.340038*	0.222091*	0.114449*	-0.0437527*
-52.98*	0.437855*	0.657827*	0.374744*	-0.338484*	0.234589*	0.130854*	-0.046885*
-52.88*	0.423016*	0.659398*	0.384129*	-0.333005*	0.25178*	0.143356*	-0.0570316*
-52.78*	0.426922*	0.664867*	0.397409*	-0.344725*	0.25178*	0.162888*	-0.0578136*
-52.68*	0.412075*	0.665648*	0.398188*	-0.355663*	0.259589*	0.155853*	-0.0820332*
-52.58*	0.412075*	0.664867*	0.399752*	-0.361914*	0.267403*	0.16523*	-0.0843773*
-52.48*	0.416767*	0.664864*	0.405219*	-0.37754*	0.279123*	0.166794*	-0.088285*
-52.38*	0.415981*	0.646114*	0.412251*	-0.379103*	0.289277*	0.171478*	-0.0859413*
-52.28*	0.39645*	0.630493*	0.411474*	-0.377535*	0.294751*	0.16914*	-0.092186*
-52.18*	0.382389*	0.625813*	0.405222*	-0.391591*	0.310373*	0.161325*	-0.0710859*
-52.08*	0.391766*	0.612522*	0.395845*	-0.39082*	0.284591*	0.175386*	-0.115627*
-51.98*	0.399578*	0.629705*	0.43256*	-0.378325*	0.288498*	0.205856*	-0.106256*
-51.88*	0.398792*	0.613302*	0.429438*	-0.371288*	0.273652*	0.202728*	-0.118753*
-51.78*	0.40192*	0.585185*	0.421633*	-0.375188*	0.243972*	0.194924*	-0.125778*
-51.68*	0.40192*	0.582839*	0.468502*	-0.37988*	0.208809*	0.186323*	-0.121093*
-51.58*	0.40192*	0.581272*	0.483345*	-0.394726*	0.211153*	0.187105*	-0.111721*
-51.48*	0.397236*	0.589079*	0.505217*	-0.358011*	0.329905*	0.219137*	-0.100788*
-51.38*	0.39645*	0.58283*	0.526314*	-0.354107*	0.372872*	0.273824*	-0.0742207*
-51.28*	0.372231*	0.515682*	0.483379*	-0.347819*	0.360405*	0.358232*	-0.0351262*
-51.18*	0.30505*	0.333707*	0.370848*	-0.277447*	0.305686*	0.268356*	0.0789943*
-51.08*	0.498016*	0.350803*	0.358345*	-0.0658207*	0.379902*	0.269135*	0.303122*
-50.98*	0.367546*	0.328314*	0.186638*	0.0609092*	0.0275602*	0.198043*	0.516571*
-50.88*	-0.171513*	0.333878*	-0.0674343*	-1.3765*	-0.833377*	-0.233206*	-0.607813*
-50.78*	-0.198082*	1.0091*	0.352579*	-1.1458*	-0.567268*	-0.0999106*	-0.842487*
-50.68*	0.337074*	0.666752*	0.518503*	-0.870964*	-0.023221*	0.259762*	-0.242645*
-50.58*	0.406605*	0.733616*	0.52475*	-0.630665*	0.148652*	0.206635*	-0.0289116*
-50.48*	0.58395*	0.833514*	0.659806*	-0.437797*	0.277558*	0.331635*	0.0959883*
-50.38*	0.593327*	0.754716*	0.634129*	-0.355656*	0.336155*	0.317575*	0.171093*
-50.28*	0.536293*	0.619623*	0.578728*	-0.362625*	0.357317*	0.234831*	0.103193*
-50.18*	0.509731*	0.628993*	0.563032*	-0.414193*	0.341622*	0.201167*	0.0875616*
-50.08*	0.540203*	0.66721*	0.588816*	-0.397068*	0.349436*	0.2332*	0.0656242*
-49.98*	0.532391*	0.69223*	0.612272*	-0.391581*	0.347092*	0.231638*	0.0679874*
-49.88*	0.519108*	0.712543*	0.614597*	-0.393143*	0.347092*	0.251169*	0.0695305*
-49.78*	0.525356*	0.721922*	0.595089*	-0.436108*	0.318209*	0.247286*	0.0406475*
-49.68*	0.534733*	0.741436*	0.595064*	-0.440032*	0.322872*	0.229292*	0.0367236*
-49.58*	0.548016*	0.735958*	0.591158*	-0.441601*	0.333809*	0.218355*	0.044529*
-49.48*	0.540981*	0.735182*	0.587254*	-0.443943*	0.333809*	0.214449*	0.0445313*
-49.38*	0.534733*	0.73752*	0.603659*	-0.425978*	0.341622*	0.229292*	0.0406227*
-49.28*	0.519108*	0.731285*	0.594295*	-0.426745*	0.333041*	0.212118*	0.0250106*
-49.18*	0.526142*	0.74533*	0.59116*	-0.409574*	0.349436*	0.219137*	0.0304632*
-49.08*	0.52145*	0.755489*	0.601313*	-0.392384*	0.343964*	0.22226*	0.0335903*
-48.98*	0.505047*	0.733628*	0.577109*	-0.381431*	0.317405*	0.205856*	0.0320425*
-48.88*	0.4902*	0.711755*	0.559908*	-0.37362*	0.295528*	0.20273*	0.00781*
-48.78*	0.454266*	0.684422*	0.524776*	-0.403296*	0.274459*	0.170723*	-0.0163841*
-48.68*	0.448795*	0.689089*	0.532564*	-0.40097*	0.281466*	0.17148*	-0.0140591*
-48.58*	0.460514*	0.710178*	0.544283*	-0.39082*	0.300997*	0.178511*	-0.0140648*
-48.48*	0.450359*	0.698471*	0.538045*	-0.409558*	0.274436*	0.1707*	-0.0242085*
-48.38*	0.456608*	0.696121*	0.549751*	-0.412692*	0.279122*	0.175386*	-0.0195332*
-48.28*	0.469105*	0.687522*	0.54116*	-0.410349*	0.277561*	0.167575*	-0.0140634*
-48.18*	0.465984*	0.688306*	0.550533*	-0.402537*	0.267403*	0.157417*	-0.00391*
-48.08*	0.460514*	0.690647*	0.547409*	-0.407225*	0.261155*	0.152731*	0.00703*
-47.98*	0.466763*	0.696892*	0.552092*	-0.381449*	0.258028*	0.155855*	0.0210876*
-47.88*	0.456608*	0.690652*	0.550533*	-0.371284*	0.251778*	0.151949*	0.0171852*
-47.78*	0.442547*	0.682063*	0.553666*	-0.379875*	0.24163*	0.152737*	0.0250058*
-47.68*	0.448795*	0.667994*	0.560688*	-0.38144*	0.218964*	0.136322*	0.0132837*
-47.58*	0.448795*	0.682056*	0.565378*	-0.369724*	0.21428*	0.133982*	0.0249996*
-47.48*	0.456608*	0.685179*	0.563814*	-0.371288*	0.212714*	0.140228*	0.0234356*
-47.38*	0.452702*	0.671119*	0.552097*	-0.365815*	0.21428*	0.137106*	0.00703*
-47.28*	0.481609*	0.690636*	0.565365*	-0.3463*	0.220517*	0.161313*	0.0226426*
-47.18*	0.478481*	0.692211*	0.570065*	-0.336914*	0.218966*	0.149605*	-0.00625*
-47.08*	0.4902*	0.689083*	0.556002*	-0.32832*	0.210372*	0.149605*	-0.0156269*
-46.98*	0.501141*	0.706267*	0.553653*	-0.31895*	0.208809*	0.157417*	-0.00469*
-46.88*	0.494106*	0.696897*	0.558344*	-0.302539*	0.207245*	0.144135*	-0.0195351*
-46.78*	0.494106*	0.688302*	0.54428*	-0.293949*	0.199431*	0.141789*	-0.0257869*
-46.68*	0.502705*	0.675024*	0.541941*	-0.287692*	0.190842*	0.127731*	-0.0359368*
-46.58*	0.507389*	0.671116*	0.552095*	-0.279882*	0.190841*	0.136324*	-0.0351582*
-46.48*	0.503483*	0.667212*	0.536473*	-0.282224*	0.179903*	0.118355*	-0.0374999*
-46.38*	0.487858*	0.651587*	0.532564*	-0.289255*	0.175216*	0.116011*	-0.0531273*
-46.28*	0.485516*	0.657052*	0.528656*	-0.282228*	0.17912*	0.118353*	-0.0437541*
-46.18*	0.488636*	0.657833*	0.523188*	-0.279885*	0.179902*	0.130072*	-0.0390668*
-46.08*	0.477703*	0.631275*	0.500534*	-0.291599*	0.159592*	0.127731*	-0.0437508*
-45.98*	0.477703*	0.635961*	0.481784*	-0.289256*	0.150216*	0.118355*	-0.0296888*
-45.88*	0.462856*	0.622678*	0.480219*	-0.293164*	0.148652*	0.107416*	-0.0367222*
-45.78*	0.470669*	0.620331*	0.473967*	-0.287698*	0.156462*	0.122258*	-0.0179744*
-45.68*	0.472233*	0.622677*	0.466158*	-0.293945*	0.165841*	0.116793*	-0.000784*
-45.58*	0.460514*	0.620335*	0.452095*	-0.29707*	0.154122*	0.126167*	0.00781*
-45.48*	0.454266*	0.617989*	0.446625*	-0.280666*	0.15178*	0.1332*	0.0226521*
-45.38*	0.437077*	0.608622*	0.423189*	-0.281439*	0.142403*	0.118355*	0.0039*
-45.28*	0.429264*	0.610173*	0.423182*	-0.270515*	0.142396*	0.118348*	0.0265527*
-45.18*	0.428486*	0.594556*	0.420847*	-0.264254*	0.153342*	0.116013*	0.0304694*
-45.08*	0.425358*	0.596897*	0.423189*	-0.252539*	0.161934*	0.112886*	0.0351543*
-44.98*	0.423794*	0.591423*	0.417715*	-0.244732*	0.168183*	0.130072*	0.0523357*
-44.88*	0.405827*	0.579712*	0.41147*	-0.250191*	0.161934*	0.118355*	0.044529*
-44.78*	0.405827*	0.577366*	0.399752*	-0.24082*	0.161934*	0.120699*	0.044529*
-44.68*	0.409733*	0.578924*	0.391159*	-0.223637*	0.169748*	0.13945*	0.0406189*
-44.58*	0.407391*	0.569553*	0.372408*	-0.238476*	0.143966*	0.122261*	0.0249977*
-44.48*	0.394886*	0.566422*	0.37709*	-0.221294*	0.156464*	0.12851*	0.0328045*
-44.38*	0.412075*	0.581269*	0.362251*	-0.209573*	0.164278*	0.122261*	0.044529*
-44.28*	0.411297*	0.561741*	0.352877*	-0.20957*	0.163497*	0.123823*	0.0367165*
-44.18*	0.417545*	0.571113*	0.352877*	-0.211137*	0.179903*	0.132418*	0.0445242*
-44.08*	0.429264*	0.581272*	0.350534*	-0.200193*	0.190842*	0.141012*	0.0539055*
-43.98*	0.417545*	0.569559*	0.343508*	-0.208002*	0.181466*	0.14023*	0.0328159*
-43.88*	0.409733*	0.559399*	0.346626*	-0.213476*	0.183809*	0.137886*	0.0328102*
-43.78*	0.429264*	0.585166*	0.376302*	-0.191613*	0.214266*	0.157405*	0.0523295*
-43.68*	0.415981*	0.575803*	0.392719*	-0.19004*	0.221308*	0.148041*	0.0507784*
-43.58*	0.409733*	0.557835*	0.384127*	-0.190039*	0.225997*	0.141792*	0.0429668*
-43.48*	0.412861*	0.559393*	0.39506*	-0.190042*	0.228342*	0.151169*	0.0343685*
-43.38*	0.404263*	0.560178*	0.394283*	-0.182225*	0.222091*	0.137886*	0.0249977*
-43.28*	0.398014*	0.556272*	0.406001*	-0.191602*	0.226778*	0.12851*	0.0234346*
-43.18*	0.407391*	0.551584*	0.427097*	-0.200195*	0.232248*	0.119919*	0.0164032*
-43.08*	0.403484*	0.537525*	0.434128*	-0.2041*	0.231467*	0.116013*	0.0109367*
-42.98*	0.39645*	0.539081*	0.431781*	-0.215041*	0.240839*	0.108978*	-0.00000429*
-42.88*	0.398014*	0.538302*	0.44272*	-0.22129*	0.241622*	0.101168*	0.0039*
-42.78*	0.395672*	0.547674*	0.445841*	-0.209574*	0.259586*	0.112101*	0.0148373*
-42.68*	0.383167*	0.536739*	0.463032*	-0.197854*	0.273652*	0.101166*	0.0156207*
-42.58*	0.376141*	0.528149*	0.473972*	-0.192381*	0.280686*	0.0902309*	0.00469*
-42.48*	0.37067*	0.520335*	0.475531*	-0.199415*	0.273653*	0.091011*	0.0132775*
-42.38*	0.362858*	0.522676*	0.488033*	-0.192385*	0.286934*	0.0855427*	0.0195293*
-42.28*	0.358952*	0.521117*	0.485692*	-0.199411*	0.275218*	0.0847631*	0.0148435*
-42.18*	0.358952*	0.538299*	0.493502*	-0.188481*	0.292403*	0.0988235*	0.0039*
-42.08*	0.357388*	0.539082*	0.4935*	-0.181446*	0.301777*	0.108978*	0.0234337*
-41.98*	0.348797*	0.539868*	0.493504*	-0.1791*	0.313498*	0.0988255*	0.0242181*
-41.88*	0.329266*	0.518778*	0.481783*	-0.193939*	0.312716*	0.091011*	0.00937*
-41.78*	0.335514*	0.508612*	0.480997*	-0.184574*	0.333024*	0.0886631*	0.0210876*
-41.68*	0.333172*	0.485188*	0.468502*	-0.207218*	0.314278*	0.0769482*	0.00938*
-41.58*	0.316761*	0.466427*	0.448969*	-0.220509*	0.297089*	0.0488224*	-0.00782*
-41.48*	0.329266*	0.460176*	0.444283*	-0.218164*	0.294748*	0.0628872*	-0.00703*
-41.38*	0.314419*	0.466429*	0.441156*	-0.211132*	0.289277*	0.0660095*	-0.0171909*
-41.28*	0.314419*	0.465645*	0.438811*	-0.190042*	0.29865*	0.0621018*	-0.0140681*
-41.18*	0.319111*	0.467988*	0.459909*	-0.192384*	0.321311*	0.0691376*	-0.0086*
-41.08*	0.315983*	0.460178*	0.450533*	-0.213476*	0.312716*	0.059761*	-0.0257835*
-40.98*	0.321453*	0.459394*	0.459904*	-0.201761*	0.331467*	0.0691376*	-0.0140686*
-40.88*	0.324574*	0.464865*	0.459126*	-0.213476*	0.318964*	0.0566349*	-0.00782*
-40.78*	0.326923*	0.453935*	0.452102*	-0.213469*	0.319754*	0.0589862*	-0.0281205*
-40.68*	0.336292*	0.45705*	0.452875*	-0.218947*	0.320527*	0.0605412*	-0.0257859*
-40.58*	0.340984*	0.452366*	0.438814*	-0.20957*	0.304122*	0.0519485*	-0.0257835*
-40.48*	0.349575*	0.450019*	0.462247*	-0.213481*	0.312716*	0.0636673*	-0.0234442*
-40.38*	0.368328*	0.465643*	0.452097*	-0.201761*	0.331467*	0.0824184*	-0.00313*
-40.28*	0.349575*	0.452372*	0.444288*	-0.208002*	0.31194*	0.0816422*	-0.0156212*
-40.18*	0.358952*	0.466428*	0.448969*	-0.212695*	0.318964*	0.0777283*	-0.00625*
-40.08*	0.368328*	0.460178*	0.440378*	-0.206444*	0.323655*	0.0832005*	-0.00469*
-39.98*	0.351139*	0.452372*	0.423195*	-0.217377*	0.315841*	0.0831985*	-0.0117149*
-39.88*	0.374577*	0.448455*	0.433346*	-0.191606*	0.320528*	0.0808544*	-0.00391*
-39.78*	0.374577*	0.456267*	0.438809*	-0.179887*	0.337711*	0.0871*	0.0148363*
-39.68*	0.358952*	0.432067*	0.413034*	-0.19862*	0.313498*	0.0691376*	-0.00858*
-39.58*	0.345669*	0.427364*	0.403656*	-0.21504*	0.297089*	0.058197*	-0.0273476*
-39.48*	0.337078*	0.409402*	0.389602*	-0.229094*	0.290842*	0.0378876*	-0.0335889*
-39.38*	0.326138*	0.403929*	0.381001*	-0.23457*	0.289277*	0.026947*	-0.0257854*
-39.28*	0.317547*	0.39924*	0.381783*	-0.237696*	0.283028*	0.0324173*	-0.0257835*
-39.18*	0.30817*	0.388309*	0.370844*	-0.242377*	0.283027*	0.0191345*	-0.0234346*
-39.08*	0.300358*	0.369556*	0.342722*	-0.260349*	0.280686*	0.0121059*	-0.0148449*
-38.98*	0.296452*	0.376584*	0.333346*	-0.252538*	0.261934*	0.0167923*	-0.015626*
-38.88*	0.292545*	0.362525*	0.339596*	-0.25488*	0.267403*	0.0152302*	-0.017971*
-38.78*	0.290203*	0.358618*	0.33491*	-0.258005*	0.253343*	0.0128884*	-0.00625*
-38.68*	0.288639*	0.350803*	0.33569*	-0.244726*	0.254122*	0.00273*	-0.00391*
-38.58*	0.27692*	0.339085*	0.334909*	-0.243162*	0.249436*	0.00664*	-0.00313*
-38.48*	0.27692*	0.350802*	0.352875*	-0.236915*	0.253341*	0.0113239*	0.00781*
-38.38*	0.277699*	0.358612*	0.360687*	-0.220512*	0.246308*	0.0206966*	0.0117149*
-38.28*	0.280827*	0.339088*	0.355225*	-0.215816*	0.242407*	0.030859*	-0.00469*
-38.18*	0.282391*	0.353138*	0.368502*	-0.195514*	0.251778*	0.044136*	0.0078*
-38.08*	0.283169*	0.352367*	0.374752*	-0.197851*	0.246309*	0.0324173*	0.0187473*
-37.98*	0.294109*	0.358616*	0.385689*	-0.196289*	0.243966*	0.0347614*	0.0156231*
-37.88*	0.296452*	0.358613*	0.391941*	-0.184572*	0.243186*	0.0496063*	0.0226555*
-37.78*	0.298016*	0.358622*	0.393507*	-0.203314*	0.240065*	0.0417976*	0.0156288*
-37.68*	0.29723*	0.34924*	0.388813*	-0.203321*	0.22912*	0.0464783*	0.0234346*
-37.58*	0.288639*	0.350025*	0.381784*	-0.211912*	0.229905*	0.0261688*	0.0164051*
-37.48*	0.300358*	0.346896*	0.385687*	-0.219728*	0.233809*	0.0308552*	0.0273404*
-37.38*	0.288639*	0.339864*	0.381001*	-0.212695*	0.230683*	0.0308533*	0.0234337*
-37.28*	0.280827*	0.342995*	0.386475*	-0.209566*	0.224438*	0.0261707*	0.0187511*
-37.18*	0.286297*	0.336739*	0.395065*	-0.204103*	0.218186*	0.0378876*	0.0304646*
-37.08*	0.27692*	0.327366*	0.38022*	-0.218945*	0.203341*	0.0308552*	0.0156231*
-36.98*	0.288639*	0.327359*	0.391932*	-0.197858*	0.214278*	0.0519485*	0.0382714*
-36.88*	0.27692*	0.329708*	0.394283*	-0.208008*	0.220528*	0.0535107*	0.0351543*
-36.78*	0.284733*	0.346892*	0.403653*	-0.191606*	0.211148*	0.05585*	0.0523367*
-36.68*	0.282391*	0.34612*	0.402878*	-0.184567*	0.206467*	0.0480442*	0.0523448*
-36.58*	0.27692*	0.346897*	0.402096*	-0.180664*	0.202559*	0.0613232*	0.0656223*
-36.48*	0.275356*	0.345334*	0.409907*	-0.181445*	0.207245*	0.0660095*	0.0624971*
-36.38*	0.269108*	0.353142*	0.40522*	-0.178323*	0.203341*	0.0581989*	0.0703106*
-36.28*	0.279263*	0.37033*	0.419278*	-0.170512*	0.220523*	0.0730371*	0.0757742*
-36.18*	0.278484*	0.357839*	0.411472*	-0.171286*	0.212717*	0.0675755*	0.0750003*
-36.08*	0.270672*	0.358616*	0.41147*	-0.174414*	0.224434*	0.0792923*	0.0718727*
-35.98*	0.27692*	0.360958*	0.406002*	-0.17207*	0.214278*	0.0792923*	0.0664043*
-35.88*	0.284733*	0.379706*	0.424751*	-0.154887*	0.220528*	0.0894489*	0.0835915*
-35.78*	0.275356*	0.372678*	0.429439*	-0.164258*	0.218965*	0.089448*	0.0703096*
-35.68*	0.269108*	0.37658*	0.423189*	-0.158792*	0.215059*	0.0964794*	0.0695252*
-35.58*	0.269108*	0.364086*	0.415377*	-0.156445*	0.224434*	0.091011*	0.075779*
-35.48*	0.257389*	0.358616*	0.415377*	-0.158789*	0.214278*	0.091011*	0.0640602*
-35.38*	0.262859*	0.364083*	0.411472*	-0.159572*	0.218186*	0.0964813*	0.0718746*
-35.28*	0.259731*	0.366427*	0.423188*	-0.162696*	0.220527*	0.0988221*	0.08359*
-35.18*	0.27692*	0.368766*	0.424751*	-0.154887*	0.216622*	0.0988235*	0.0835867*
-35.08*	0.27692*	0.378147*	0.44272*	-0.14082*	0.230684*	0.110542*	0.0953102*
-34.98*	0.279263*	0.388296*	0.44115*	-0.121296*	0.232245*	0.111322*	0.0953021*
-34.88*	0.280827*	0.378146*	0.445065*	-0.12754*	0.240059*	0.110542*	0.105467*
-34.78*	0.269108*	0.378147*	0.44272*	-0.137695*	0.232247*	0.104292*	0.114841*
-34.68*	0.280827*	0.384388*	0.448189*	-0.119733*	0.234591*	0.124605*	0.116396*
-34.58*	0.280827*	0.401585*	0.462252*	-0.10957*	0.237716*	0.130074*	0.103123*
-34.48*	0.280827*	0.39143*	0.464596*	-0.108007*	0.222872*	0.131636*	0.103123*
-34.38*	0.280827*	0.40939*	0.47397*	-0.0962958*	0.232247*	0.141792*	0.114841*
-34.28*	0.288639*	0.409392*	0.48334*	-0.0869188*	0.233805*	0.140225*	0.11093*
-34.18*	0.290203*	0.409391*	0.498972*	-0.0806675*	0.237717*	0.158981*	0.120306*
-34.08*	0.269108*	0.409397*	0.481783*	-0.0806637*	0.228341*	0.144136*	0.113279*
-33.98*	0.269108*	0.410961*	0.472408*	-0.0791016*	0.222872*	0.141792*	0.114841*
-33.88*	0.267544*	0.419546*	0.491938*	-0.0720773*	0.242402*	0.14179*	0.124996*
-33.78*	0.262859*	0.409396*	0.485688*	-0.0689459*	0.243965*	0.149604*	0.114841*
-33.68*	0.280827*	0.42111*	0.483347*	-0.05723*	0.241623*	0.151169*	0.124212*
-33.58*	0.288639*	0.41721*	0.481783*	-0.0611324*	0.240059*	0.137886*	0.117186*
-33.48*	0.27692*	0.409397*	0.484127*	-0.0611324*	0.240059*	0.132418*	0.114841*
-33.38*	0.274578*	0.396902*	0.479441*	-0.0712857*	0.240061*	0.13945*	0.114061*
-33.28*	0.269108*	0.403926*	0.481781*	-0.0705094*	0.250214*	0.130071*	0.121089*
-33.18*	0.269108*	0.392212*	0.47397*	-0.0751915*	0.236153*	0.122261*	0.107033*
-33.08*	0.265202*	0.409397*	0.481783*	-0.0611324*	0.232247*	0.120699*	0.103123*
-32.98*	0.265202*	0.397678*	0.470064*	-0.070507*	0.232247*	0.123823*	0.103123*
-32.88*	0.269108*	0.407049*	0.479441*	-0.0517616*	0.23928*	0.130075*	0.103125*
-32.78*	0.257389*	0.378153*	0.462257*	-0.0595646*	0.222878*	0.130079*	0.0953159*
-32.68*	0.263638*	0.385956*	0.4685*	-0.0548878*	0.226777*	0.126165*	0.101555*
-32.58*	0.255047*	0.397678*	0.462252*	-0.0494137*	0.232247*	0.14023*	0.108591*
-32.48*	0.244106*	0.389866*	0.464596*	-0.0470695*	0.224434*	0.130074*	0.103123*
-32.38*	0.241764*	0.392201*	0.483345*	-0.0377021*	0.237716*	0.136324*	0.109373*
-32.28*	0.251141*	0.409392*	0.47631*	-0.0298872*	0.240055*	0.14335*	0.126555*
-32.18*	0.243328*	0.407056*	0.471628*	-0.0322232*	0.229905*	0.13945*	0.124219*
-32.08*	0.2402*	0.411739*	0.47397*	-0.0376949*	0.234591*	0.132418*	0.114841*
-31.98*	0.248013*	0.407834*	0.472407*	-0.039258*	0.242402*	0.140228*	0.107028*
-31.88*	0.237858*	0.403148*	0.46772*	-0.0494146*	0.232247*	0.135542*	0.114841*
-31.78*	0.235516*	0.407056*	0.470068*	-0.0501924*	0.231469*	0.127733*	0.100782*
-31.68*	0.220669*	0.397677*	0.456001*	-0.0548835*	0.240059*	0.132418*	0.103121*
-31.58*	0.231609*	0.397678*	0.450533*	-0.0595703*	0.240059*	0.131636*	0.0953102*
-31.48*	0.228481*	0.388303*	0.44897*	-0.0626955*	0.238495*	0.12851*	0.0820284*
-31.38*	0.230045*	0.375805*	0.440378*	-0.0634742*	0.229905*	0.118357*	0.0812492*
-31.28*	0.231609*	0.370333*	0.442719*	-0.062696*	0.220527*	0.12226*	0.08359*
-31.18*	0.237858*	0.358616*	0.431002*	-0.0806637*	0.220528*	0.110542*	0.0835915*
-31.08*	0.228481*	0.350803*	0.431002*	-0.0806637*	0.212716*	0.112104*	0.0718727*
-30.98*	0.243328*	0.344552*	0.428656*	-0.0751967*	0.208811*	0.118357*	0.0773396*
-30.88*	0.226139*	0.333621*	0.417719*	-0.0939398*	0.195527*	0.105072*	0.0664024*
-30.78*	0.237858*	0.327363*	0.411467*	-0.100198*	0.193181*	0.114445*	0.066401*
-30.68*	0.2402*	0.321896*	0.413815*	-0.100195*	0.193184*	0.118355*	0.075779*
-30.58*	0.247234*	0.340649*	0.424753*	-0.0892563*	0.190842*	0.122263*	0.0710926*
-30.48*	0.231609*	0.331278*	0.40132*	-0.100189*	0.183028*	0.122261*	0.0468788*
-30.38*	0.248013*	0.327361*	0.402096*	-0.0923872*	0.189278*	0.119917*	0.0640602*
-30.28*	0.244106*	0.325803*	0.402095*	-0.10332*	0.17834*	0.119136*	0.0624971*
-30.18*	0.249577*	0.321115*	0.393503*	-0.0908203*	0.190842*	0.131638*	0.0539036*
-30.08*	0.243328*	0.311741*	0.372408*	-0.0986328*	0.183809*	0.123823*	0.044529*
-29.98*	0.259731*	0.30783*	0.380216*	-0.0962934*	0.193184*	0.128511*	0.0445242*
-29.88*	0.255825*	0.306272*	0.370844*	-0.0994139*	0.19162*	0.12851*	0.0312462*
-29.78*	0.260517*	0.309397*	0.363813*	-0.110352*	0.194746*	0.13398*	0.0343723*
-29.68*	0.249577*	0.301592*	0.360689*	-0.11972*	0.186934*	0.122261*	0.00547*
-29.58*	0.24567*	0.315647*	0.368502*	-0.123632*	0.189278*	0.130074*	0.013279*
-29.48*	0.24567*	0.305494*	0.348974*	-0.133786*	0.186936*	0.121481*	-0.000781*
-29.38*	0.244106*	0.30627*	0.359125*	-0.133009*	0.190058*	0.116791*	0.00156*
-29.28*	0.237858*	0.288307*	0.345068*	-0.150972*	0.181469*	0.0988274*	-0.00625*
-29.18*	0.229267*	0.285963*	0.331003*	-0.153317*	0.179123*	0.0988255*	-0.00625*
-29.08*	0.215199*	0.263302*	0.320063*	-0.172071*	0.158027*	0.089447*	-0.0195351*
-28.98*	0.227703*	0.258615*	0.31147*	-0.180664*	0.154123*	0.0808563*	-0.0140648*
-28.88*	0.218327*	0.249247*	0.294283*	-0.190033*	0.142403*	0.0714798*	-0.0218773*
-28.78*	0.216763*	0.243767*	0.300528*	-0.190044*	0.142398*	0.0714741*	-0.0257893*
-28.68*	0.212856*	0.237526*	0.284126*	-0.201754*	0.129122*	0.0714798*	-0.0257797*
-28.58*	0.221455*	0.239086*	0.291941*	-0.201756*	0.132248*	0.0691376*	-0.0359383*
-28.48*	0.218327*	0.229715*	0.28257*	-0.199408*	0.115059*	0.059761*	-0.0453091*
-28.38*	0.211292*	0.216428*	0.269281*	-0.199414*	0.101777*	0.058197*	-0.0445347*
-28.28*	0.219891*	0.215649*	0.263035*	-0.198631*	0.0931864*	0.0496068*	-0.0476565*
-28.18*	0.200359*	0.198465*	0.251314*	-0.211126*	0.0720906*	0.0308552*	-0.0648403*
-28.08*	0.204266*	0.207836*	0.252878*	-0.200193*	0.0830297*	0.0496063*	-0.0554695*
-27.98*	0.185513*	0.185184*	0.241944*	-0.221284*	0.0783391*	0.0324154*	-0.07656*
-27.88*	0.187077*	0.18674*	0.231783*	-0.211133*	0.0822468*	0.0402298*	-0.0742207*
-27.78*	0.185513*	0.198452*	0.243495*	-0.197858*	0.0916147*	0.0425668*	-0.0531344*
-27.68*	0.178486*	0.190649*	0.223972*	-0.211911*	0.0908422*	0.0496063*	-0.0671868*
-27.58*	0.175358*	0.196117*	0.231783*	-0.211914*	0.0900593*	0.0363235*	-0.0687523*
-27.48*	0.187855*	0.187513*	0.230213*	-0.200984*	0.109589*	0.0386658*	-0.0570416*
-27.38*	0.179264*	0.190651*	0.216158*	-0.197847*	0.103341*	0.0206985*	-0.064846*
-27.28*	0.18317*	0.202359*	0.216151*	-0.195514*	0.116615*	0.0324101*	-0.0625091*
-27.18*	0.176922*	0.196114*	0.22319*	-0.180665*	0.128342*	0.0378876*	-0.0453162*
-27.08*	0.169109*	0.180492*	0.220064*	-0.200195*	0.0994344*	0.0206985*	-0.0531273*
-26.98*	0.165981*	0.185178*	0.210689*	-0.199414*	0.0978703*	0.0191345*	-0.0546904*
-26.88*	0.162075*	0.178925*	0.204439*	-0.190042*	0.103341*	0.012886*	-0.0593777*
-26.78*	0.176922*	0.176583*	0.21225*	-0.182228*	0.107245*	0.018353*	-0.0593791*
-26.68*	0.157391*	0.169558*	0.204439*	-0.18222*	0.0799031*	0.00117*	-0.0742149*
-26.58*	0.167545*	0.178928*	0.216158*	-0.174414*	0.0916219*	0.00117*	-0.0531273*
-26.48*	0.169888*	0.178928*	0.204439*	-0.158789*	0.0916219*	0.00273*	-0.064846*
-26.38*	0.187077*	0.178924*	0.213814*	-0.1627*	0.0916219*	0.00507*	-0.0632839*
-26.28*	0.173794*	0.165647*	0.209126*	-0.170508*	0.0916214*	0.00351*	-0.0585966*
-26.18*	0.171452*	0.171113*	0.22397*	-0.156448*	0.0916219*	0.00351*	-0.0625052*
-26.08*	0.169109*	0.168774*	0.215378*	-0.161131*	0.0892797*	0.0105438*	-0.063282*
-25.98*	0.150356*	0.153931*	0.214598*	-0.168161*	0.0767765*	-0.0105534*	-0.0820308*
-25.88*	0.157391*	0.15861*	0.229441*	-0.165046*	0.0892797*	-0.0105495*	-0.0750008*
-25.78*	0.148014*	0.155497*	0.208351*	-0.172064*	0.0822525*	-0.0105457*	-0.0828094*
-25.68*	0.148014*	0.167202*	0.220064*	-0.157234*	0.103341*	0.00117*	-0.0765719*
-25.58*	0.15192*	0.16721*	0.234127*	-0.139257*	0.116622*	0.00117*	-0.0742207*
-25.48*	0.140202*	0.16721*	0.235689*	-0.139257*	0.122872*	0.00117*	-0.064846*
-25.38*	0.140202*	0.161739*	0.22397*	-0.139257*	0.122872*	-0.00665*	-0.0710964*
-25.28*	0.123798*	0.168775*	0.223974*	-0.150973*	0.108812*	-0.00899*	-0.0648427*
-25.18*	0.112858*	0.155492*	0.22397*	-0.143163*	0.107247*	-0.0222702*	-0.0570326*
-25.08*	0.101917*	0.134396*	0.223969*	-0.15254*	0.0978703*	-0.0238342*	-0.0585976*
-24.98*	0.101139*	0.139863*	0.223967*	-0.147073*	0.103341*	-0.0261765*	-0.0507865*
-24.88*	0.0894203*	0.132053*	0.22397*	-0.14707*	0.103341*	-0.0261765*	-0.0515652*
-24.78*	0.0870781*	0.122677*	0.212252*	-0.14707*	0.0916219*	-0.0378952*	-0.0453148*
-24.68*	0.0777016*	0.117989*	0.209909*	-0.153322*	0.0892797*	-0.0441437*	-0.0453162*
-24.58*	0.0800438*	0.110958*	0.214594*	-0.147072*	0.0939641*	-0.0394592*	-0.0414104*
-24.48*	0.0831718*	0.121893*	0.212246*	-0.139263*	0.0916219*	-0.0378952*	-0.0257893*
-24.38*	0.0761375*	0.120335*	0.212252*	-0.139257*	0.0916219*	-0.049614*	-0.0257835*
-24.28*	0.0597343*	0.110958*	0.204439*	-0.150976*	0.0838094*	-0.0519581*	-0.0257835*
-24.18*	0.0644188*	0.112522*	0.204439*	-0.150976*	0.0720906*	-0.0668011*	-0.033596*
-24.08*	0.0597343*	0.108616*	0.212252*	-0.143164*	0.0799031*	-0.049614*	-0.0257835*
-23.98*	0.0636406*	0.119551*	0.209904*	-0.141605*	0.0916233*	-0.0519562*	-0.0164127*
-23.88*	0.0542641*	0.116434*	0.19272*	-0.15097*	0.0799031*	-0.0613327*	-0.0375023*
-23.78*	0.0581703*	0.120327*	0.204432*	-0.150983*	0.0931773*	-0.0574336*	-0.0257907*
-23.68*	0.0659828*	0.130485*	0.200533*	-0.143168*	0.107247*	-0.049614*	-0.0156317*
-23.58*	0.0566063*	0.139866*	0.198971*	-0.143164*	0.107247*	-0.0613327*	-0.0086*
-23.48*	0.0581703*	0.128147*	0.19272*	-0.143164*	0.0994344*	-0.0613327*	-0.0273457*
-23.38*	0.0566063*	0.128148*	0.183344*	-0.156446*	0.0978703*	-0.0683651*	-0.0195351*
-23.28*	0.0386391*	0.130493*	0.16538*	-0.160347*	0.0916257*	-0.0652351*	-0.0335922*
-23.18*	0.0503578*	0.139859*	0.174751*	-0.149421*	0.103341*	-0.0636768*	-0.0203223*
-23.08*	0.0503578*	0.132053*	0.165377*	-0.158789*	0.103341*	-0.0574265*	-0.0257835*
-22.98*	0.0480156*	0.13752*	0.173188*	-0.150978*	0.0994358*	-0.0636749*	-0.0203166*
-22.88*	0.0269203*	0.128153*	0.170845*	-0.15097*	0.0970907*	-0.0730515*	-0.0351582*
-22.78*	0.0292625*	0.116428*	0.16147*	-0.162695*	0.0822468*	-0.0785198*	-0.0257835*
-22.68*	0.0503578*	0.12814*	0.173189*	-0.150983*	0.103341*	-0.0574265*	-0.0140719*
-22.58*	0.0464516*	0.128147*	0.181002*	-0.150976*	0.111153*	-0.0597706*	-0.00625*
-22.48*	0.0386391*	0.128147*	0.171627*	-0.150976*	0.0994344*	-0.0535202*	-0.017971*
-22.38*	0.0503578*	0.137516*	0.19272*	-0.139265*	0.111153*	-0.049614*	-0.00625*
-22.28*	0.0503578*	0.116428*	0.190376*	-0.150976*	0.111153*	-0.049614*	-0.00625*
-22.18*	0.0464516*	0.124236*	0.191158*	-0.143168*	0.112716*	-0.0535202*	-0.00469*
-22.08*	0.0386391*	0.124241*	0.200533*	-0.141602*	0.107247*	-0.0589886*	-0.0101585*
-21.98*	0.0386391*	0.124241*	0.19272*	-0.143164*	0.109591*	-0.049614*	-0.0101585*
-21.88*	0.037075*	0.134389*	0.202875*	-0.144734*	0.12912*	-0.051178*	-0.00000381*
-21.78*	0.0308266*	0.122681*	0.186474*	-0.148628*	0.115063*	-0.0558605*	-0.0039*
-21.68*	0.0284843*	0.129713*	0.190378*	-0.149411*	0.112717*	-0.0636749*	-0.00469*
-21.58*	0.0191078*	0.108616*	0.173189*	-0.168945*	0.0916219*	-0.0730515*	-0.0140648*
-21.48*	0.0230141*	0.120327*	0.184901*	-0.150983*	0.104903*	-0.0691452*	-0.0140719*
-21.38*	0.0323906*	0.1258*	0.181002*	-0.140824*	0.118966*	-0.0613327*	-0.00625*
-21.28*	0.0386391*	0.108616*	0.181002*	-0.143164*	0.118966*	-0.0613327*	-0.00625*
-21.18*	0.0269203*	0.0968971*	0.181002*	-0.14082*	0.118966*	-0.0730515*	-0.00625*
-21.08*	0.0386391*	0.110958*	0.184908*	-0.127539*	0.130684*	-0.0691452*	-0.00391*
-20.98*	0.0386391*	0.116424*	0.180997*	-0.118169*	0.126778*	-0.0730515*	0.0132742*
-20.88*	0.0269203*	0.116428*	0.181002*	-0.123632*	0.126778*	-0.0707073*	0.00547*
-20.78*	0.0269203*	0.118771*	0.173189*	-0.123632*	0.126778*	-0.0714893*	0.00547*
-20.68*	0.0269203*	0.139859*	0.184908*	-0.111921*	0.138497*	-0.080864*	0.0187402*
-20.58*	0.0167656*	0.129711*	0.170847*	-0.122068*	0.130686*	-0.0832062*	0.0109367*
-20.48*	0.00739*	0.12034*	0.161476*	-0.131439*	0.130684*	-0.0925827*	-0.00625*
-20.38*	0.0152016*	0.128142*	0.157564*	-0.133012*	0.136153*	-0.0902386*	0.00156*
-20.28*	0.00192*	0.114865*	0.156001*	-0.125196*	0.113496*	-0.082427*	-0.0117216*
-20.18*	0.00739*	0.120331*	0.153658*	-0.127542*	0.117403*	-0.0886765*	-0.00626*
-20.08*	-0.000423*	0.121899*	0.153658*	-0.139257*	0.111153*	-0.0886765*	-0.0117207*
-19.98*	-0.00199*	0.135955*	0.161466*	-0.13145*	0.111153*	-0.0925827*	-0.00626*
-19.88*	0.0191078*	0.139859*	0.16147*	-0.119733*	0.122872*	-0.0886765*	0.00547*
-19.78*	0.00895*	0.137525*	0.15913*	-0.133786*	0.120531*	-0.0910172*	-0.0164056*
-19.68*	-0.0121422*	0.116434*	0.141939*	-0.149408*	0.111153*	-0.112114*	-0.0257778*
-19.58*	-0.00824*	0.130489*	0.156*	-0.126759*	0.125214*	-0.104303*	-0.0234413*
-19.48*	0.00505*	0.137519*	0.16303*	-0.110354*	0.12053*	-0.0910187*	-0.0242238*
-19.38*	-0.00199*	0.138301*	0.152094*	-0.121291*	0.121308*	-0.0996151*	-0.0218792*
-19.28*	0.00739*	0.13986*	0.161465*	-0.119732*	0.128335*	-0.0808697*	-0.0179768*
-19.18*	0.02145*	0.15392*	0.173189*	-0.108015*	0.133028*	-0.0691452*	-0.0140719*
-19.08*	0.0308266*	0.160961*	0.165377*	-0.119726*	0.142403*	-0.0769577*	-0.0234413*
-18.98*	0.0167656*	0.149244*	0.151317*	-0.120505*	0.137717*	-0.0792999*	-0.0164056*
-18.88*	0.0175438*	0.138301*	0.152094*	-0.118947*	0.12912*	-0.0902405*	-0.0234413*
-18.78*	0.0362968*	0.145325*	0.159117*	-0.102549*	0.138487*	-0.0714989*	-0.0148544*
-18.68*	0.0191078*	0.134402*	0.150532*	-0.113471*	0.121308*	-0.082428*	-0.0289049*
-18.58*	0.0191078*	0.120335*	0.145845*	-0.127539*	0.112716*	-0.0886765*	-0.033596*
-18.48*	0.0269203*	0.116424*	0.153653*	-0.129106*	0.111153*	-0.0886765*	-0.0257883*
-18.38*	0.0152016*	0.108616*	0.143501*	-0.118164*	0.111153*	-0.0886765*	-0.0375023*
-18.28*	0.0128593*	0.106275*	0.147411*	-0.123629*	0.0970936*	-0.0910172*	-0.0453134*
-18.18*	0.0175438*	0.108614*	0.141939*	-0.119728*	0.0994344*	-0.100395*	-0.0320334*
-18.08*	0.0269203*	0.0968971*	0.141939*	-0.118164*	0.0916219*	-0.100395*	-0.0375023*
-17.98*	0.0191078*	0.0968971*	0.13022*	-0.123632*	0.0799031*	-0.112114*	-0.0351601*
-17.88*	0.0175438*	0.0875216*	0.120844*	-0.130664*	0.0783391*	-0.12149*	-0.0351601*
-17.78*	0.0112953*	0.0812688*	0.114592*	-0.127542*	0.083806*	-0.116024*	-0.0398479*
-17.68*	0.0191078*	0.0875158*	0.114595*	-0.123637*	0.0799031*	-0.108208*	-0.0257883*
-17.58*	0.0112953*	0.0812721*	0.105221*	-0.119726*	0.0744344*	-0.108208*	-0.0257835*
-17.48*	0.0112953*	0.0734596*	0.102877*	-0.119726*	0.0838094*	-0.108208*	-0.0312538*
-17.38*	0.00895*	0.0609641*	0.0927219*	-0.129879*	0.0791234*	-0.122269*	-0.0242195*
-17.28*	-0.000423*	0.0695519*	0.0849061*	-0.137697*	0.0603704*	-0.119928*	-0.0335975*
-17.18*	0.00739*	0.0656424*	0.0911579*	-0.123637*	0.0681844*	-0.119926*	-0.035943*
-17.08*	0.00739*	0.0656471*	0.093502*	-0.143164*	0.0681844*	-0.119926*	-0.0273476*
-16.98*	0.00739*	0.0695462*	0.10287*	-0.129108*	0.0720906*	-0.119926*	-0.00626*
-16.88*	0.00583*	0.0562716*	0.0935001*	-0.133008*	0.0705266*	-0.12149*	-0.0156288*
-16.78*	-0.00824*	0.0445557*	0.0770988*	-0.139254*	0.0525632*	-0.127735*	-0.0218735*
-16.68*	-0.0105782*	0.0531516*	0.0810032*	-0.147067*	0.0502172*	-0.127737*	-0.0343728*
-16.58*	-0.0238609*	0.0461159*	0.0700645*	-0.139257*	0.0408406*	-0.122271*	-0.0351601*
-16.48*	-0.0238609*	0.0461159*	0.0536575*	-0.150976*	0.0275594*	-0.139458*	-0.0257835*
-16.38*	-0.0183907*	0.0578275*	0.0700645*	-0.139265*	0.0330281*	-0.127739*	-0.0257835*
-16.28*	-0.0137062*	0.0500221*	0.0536575*	-0.14707*	0.0330281*	-0.139458*	-0.0257835*
-16.18*	-0.0238609*	0.0461111*	0.0599079*	-0.1377*	0.0291219*	-0.131645*	-0.0257883*
-16.08*	-0.0238609*	0.0484581*	0.0481892*	-0.143164*	0.0213094*	-0.131645*	-0.0257835*
-15.98*	-0.0316734*	0.0500221*	0.0403767*	-0.143164*	0.0213094*	-0.14102*	-0.0351601*
-15.88*	-0.0340157*	0.0476742*	0.0497532*	-0.145512*	0.0189672*	-0.120707*	-0.0242195*
-15.78*	-0.0433922*	0.0383091*	0.0286636*	-0.160345*	0.00178*	-0.131639*	-0.0335903*
-15.68*	-0.0394859*	0.0382962*	0.0403767*	-0.137702*	0.0134969*	-0.117582*	-0.0320392*
-15.58*	-0.0394859*	0.0304909*	0.0349083*	-0.148632*	0.00178*	-0.108208*	-0.0257835*
-15.48*	-0.0332375*	0.0367355*	0.0505276*	-0.133013*	0.00959*	-0.112116*	-0.0312576*
-15.38*	-0.0496407*	0.0187759*	0.0325642*	-0.14941*	0.00178*	-0.10977*	-0.0351601*
-15.28*	-0.0332375*	0.0320478*	0.032557*	-0.129108*	0.0134897*	-0.0886836*	-0.0218844*
-15.18*	-0.0394859*	0.0304909*	0.0247517*	-0.139257*	0.00178*	-0.096489*	-0.0203133*
-15.08*	-0.0457344*	0.0265846*	0.0278778*	-0.132225*	0.00178*	-0.0894566*	-0.0203133*
-14.98*	-0.0449562*	0.0367389*	0.0192809*	-0.130665*	0.000214*	-0.0918026*	-0.0195355*
-14.88*	-0.0512047*	0.0226822*	0.00131*	-0.125191*	-0.00447*	-0.0886765*	-0.0312538*
-14.78*	-0.0433922*	0.0187674*	0.00365*	-0.118169*	-0.00213*	-0.0886812*	-0.0257883*
-14.68*	-0.0496407*	0.0187721*	0.00131*	-0.111914*	0.000216*	-0.0980511*	-0.0257835*
-14.58*	-0.0340157*	0.0281487*	0.0130348*	-0.111912*	0.0111547*	-0.0777378*	-0.014843*
-14.48*	-0.0527687*	0.0203419*	0.00523*	-0.11972*	0.00178*	-0.0785198*	-0.0257778*
-14.38*	-0.0472984*	0.0133028*	-0.00806*	-0.131446*	-0.0115047*	-0.0691471*	-0.0367241*
-14.28*	-0.0574532*	0.0148663*	-0.00728*	-0.12363*	-0.0200949*	-0.0714869*	-0.0281253*
-14.18*	-0.0629234*	0.0187707*	0.00131*	-0.118165*	-0.0161906*	-0.080864*	-0.025785*
-14.08*	-0.0527687*	0.0289268*	0.00366*	-0.111134*	-0.00916*	-0.0683651*	-0.0273476*
-13.98*	-0.0613594*	0.0109649*	-0.00493*	-0.110344*	-0.0107204*	-0.0675812*	-0.034369*
-13.88*	-0.0746422*	0.0109606*	-0.0182171*	-0.117381*	-0.0271281*	-0.0793018*	-0.0273476*
-13.78*	-0.0605812*	0.0226712*	-0.00651*	-0.108015*	-0.0177603*	-0.0589957*	-0.0140719*
-13.68*	-0.0613594*	0.00862*	-0.0182152*	-0.116599*	-0.0200953*	-0.0582066*	-0.0164056*
-13.58*	-0.0762062*	-0.000759*	-0.018219*	-0.122852*	-0.0286921*	-0.0527401*	-0.0289116*
-13.48*	-0.0707359*	-0.000762*	-0.0182204*	-0.106449*	-0.0240031*	-0.0378952*	-0.0140681*
-13.38*	-0.0683937*	0.00158*	-0.0182171*	-0.100195*	-0.0154094*	-0.0472698*	-0.0203133*
-13.28*	-0.0652657*	0.0164266*	-0.0205626*	-0.104103*	-0.000567*	-0.0386786*	-0.0203166*
-13.18*	-0.0707359*	0.0109591*	-0.0197811*	-0.101759*	-0.00994*	-0.0293026*	-0.0171933*
-13.08*	-0.056675*	0.0226784*	-0.0260296*	-0.0947266*	0.00178*	-0.0144577*	-0.00235*
-12.98*	-0.0613594*	0.0109611*	-0.0338387*	-0.100192*	-0.00603*	-0.0269566*	-0.0124993*
-12.88*	-0.0629234*	0.0187731*	-0.0260296*	-0.0923815*	-0.00994*	-0.0222702*	-0.0140648*
-12.78*	-0.0723*	0.0187731*	-0.0393114*	-0.100196*	-0.0193162*	-0.0293016*	-0.0257826*
-12.68*	-0.0652657*	0.0187688*	-0.03228*	-0.100198*	-0.0240031*	-0.0246143*	-0.0140681*
-12.58*	-0.0512047*	0.0211143*	-0.0260296*	-0.100195*	-0.0076*	-0.0105515*	-0.0117226*
-12.48*	-0.0652657*	0.0258079*	-0.0260263*	-0.100192*	-0.000564*	-0.018362*	-0.00469*
-12.38*	-0.0683937*	0.00939*	-0.0260296*	-0.0978522*	0.00178*	-0.00508*	-0.0140648*
-12.28*	-0.0590172*	0.0203362*	-0.0260296*	-0.0986328*	-0.00603*	-0.00821*	-0.0140648*
-12.18*	-0.0613594*	0.0265799*	-0.016655*	-0.0923872*	0.00412*	0.00898*	-0.0179758*
-12.08*	-0.0574532*	0.0265846*	-0.0244656*	-0.0923805*	-0.000564*	-0.00274*	-0.0187492*
-11.98*	-0.0543327*	0.0250201*	-0.0291562*	-0.0978532*	0.00178*	-0.000397*	-0.0195355*
-11.88*	-0.0535469*	0.0265851*	-0.0205593*	-0.0931621*	0.00725*	0.000387*	-0.032032*
-11.78*	-0.073864*	0.0172148*	-0.0408678*	-0.103314*	-0.0130605*	-0.0160151*	-0.0445299*
-11.68*	-0.0574532*	0.0125203*	-0.0260296*	-0.096292*	0.00178*	-0.00821*	-0.0515666*
-11.58*	-0.0629234*	0.0187721*	-0.0260296*	-0.0783195*	-0.00603*	-0.00665*	-0.0429726*
-11.48*	-0.056675*	0.0250135*	-0.0205684*	-0.0634837*	0.00568*	-0.00508*	-0.0336032*
-11.38*	-0.0457344*	0.0343971*	-0.0143108*	-0.0666008*	-0.00447*	0.00351*	-0.033596*
-11.28*	-0.0340157*	0.0297093*	-0.0205626*	-0.0619159*	-0.000567*	0.0121026*	-0.0359416*
-11.18*	-0.0527687*	0.0289326*	-0.0275917*	-0.0626888*	-0.0076*	0.0113239*	-0.0453091*
-11.08*	-0.0433922*	0.0250206*	-0.0275936*	-0.0611343*	0.000214*	0.00742*	-0.0445366*
-10.98*	-0.0293312*	0.022675*	-0.0338454*	-0.0470729*	0.00568*	0.00351*	-0.0398479*
-10.88*	-0.0301094*	0.0203376*	-0.0346222*	-0.0494103*	-0.00838*	0.00429*	-0.0437508*
-10.78*	-0.0301094*	0.00862*	-0.0275908*	-0.0400381*	-0.00838*	0.00898*	-0.0429716*
-10.68*	-0.011364*	0.0250144*	-0.00806*	-0.0275464*	0.00803*	0.00742*	-0.0336022*
-10.58*	-0.00589*	0.0133018*	-0.0260296*	-0.0181637*	-0.00603*	-0.00665*	-0.033596*
-10.48*	-0.0012*	0.0281453*	-0.026813*	-0.0220714*	-0.000564*	0.00117*	-0.0257869*
-10.38*	-0.00199*	0.0094*	-0.0299358*	-0.0205021*	-0.0193156*	-0.0105515*	-0.0375023*
-10.28*	0.00895*	0.0281429*	-0.0299396*	-0.0205116*	-0.00057*	0.000381*	-0.0281315*
-10.18*	-0.0105782*	0.0109654*	-0.0299358*	-0.0220642*	-0.00838*	-0.00274*	-0.0453091*
-10.08*	0.00426*	0.00705*	-0.0291557*	-0.0251961*	-0.00369*	-0.00196*	-0.0375023*
-9.98004*	0.0112953*	-0.000762*	-0.0127521*	-0.00801*	-0.0076*	0.00273*	-0.0234447*
-9.88*	0.0128593*	-0.000759*	-0.0065*	-0.00644*	0.00178*	0.0113239*	-0.0257835*
-9.78003*	0.02145*	-0.000766*	-0.00416*	0.0146413*	0.0134897*	0.0245976*	-0.0140719*
-9.67999*	0.0300484*	-0.00857*	0.00444*	0.00918*	0.00178*	0.0238247*	-0.0148416*
-9.58002*	0.0269203*	-0.0187263*	0.00366*	0.0107422*	-0.00603*	0.0113239*	-0.0234413*
-9.48004*	0.0237923*	-0.0140457*	0.0114651*	0.0177689*	0.00178*	0.026947*	-0.0195389*
-9.38*	0.0191078*	-0.0296631*	0.00678*	0.0248089*	0.00178*	0.00898*	-0.0234413*
-9.28003*	0.0191078*	-0.0226312*	0.0130362*	0.0287147*	-0.0122814*	-0.00117*	-0.0148416*
-9.17999*	0.0206718*	-0.0265403*	0.0130329*	0.0419908*	-0.0076*	0.00117*	-0.0140662*
-9.08002*	0.02145*	-0.0296669*	0.0130329*	0.0427742*	-0.00603*	0.00351*	-0.0117226*
-8.98004*	0.0386391*	-0.0124817*	0.0114651*	0.0599556*	0.00178*	0.00898*	-0.00782*
-8.88*	0.0292625*	-0.0218506*	0.00522*	0.0505905*	-0.00994*	0.00117*	-0.0125008*
-8.78003*	0.0386391*	-0.0202904*	-0.00494*	0.0615234*	-0.00994*	0.00117*	-0.0156288*
-8.67999*	0.0495796*	-0.0202961*	0.0106907*	0.0701141*	0.00178*	0.00117*	0.00312*
-8.58002*	0.0409813*	-0.0281029*	-0.0104046*	0.0810547*	-0.00603*	0.00117*	-0.0125008*
-8.48004*	0.0487938*	-0.0187311*	-0.000253*	0.0896444*	-0.00838*	-0.0105515*	0.00156*
-8.38*	0.0581703*	-0.0234175*	-0.00025*	0.0990229*	-0.00369*	-0.0105534*	0.00234*
-8.28003*	0.0581703*	-0.0148234*	0.00756*	0.0990205*	0.00412*	-0.0043*	0.0187459*
-8.17999*	0.0558281*	-0.0226312*	0.0145969*	0.0912147*	0.00334*	-0.00899*	0.0109382*
-8.08002*	0.0503578*	-0.0281029*	0.0185013*	0.10293*	0.00568*	-0.00508*	0.00781*
-7.98004*	0.0527*	-0.0398216*	0.0247517*	0.0927734*	-0.00447*	0.00117*	0.0195274*
-7.88*	0.0698891*	-0.0413904*	0.0208454*	0.105269*	-0.00213*	-0.000395*	0.0367165*
-7.78003*	0.0597343*	-0.0382576*	0.0130329*	0.0990238*	-0.0076*	0.00273*	0.0265617*
-7.67999*	0.0698891*	-0.0179553*	0.0247517*	0.104485*	0.0158406*	0.0206985*	0.0390515*
-7.58002*	0.0777016*	-0.0124779*	0.0349083*	0.120899*	0.0213094*	0.0191364*	0.044529*
-7.48004*	0.0659828*	-0.0132546*	0.0435042*	0.116214*	0.0189672*	0.028513*	0.0437522*
-7.38*	0.0761375*	-0.0117002*	0.0505314*	0.11074*	0.0134953*	0.0324154*	0.0429649*
-7.28003*	0.0675468*	-0.0124774*	0.0364728*	0.116213*	0.0189676*	0.037888*	0.0328107*
-7.17999*	0.0597343*	-0.0109081*	0.0208454*	0.0974674*	0.000216*	0.0191364*	0.0210972*
-7.08002*	0.066761*	-0.0116997*	0.0247498*	0.116991*	0.0197453*	0.0386658*	0.0328102*
-6.98004*	0.0698891*	-0.0187225*	0.0247555*	0.0990276*	0.00725*	0.0339794*	0.0273437*
-6.88*	0.0675468*	-0.0226312*	0.0106907*	0.096683*	-0.000564*	0.0324192*	0.0343742*
-6.78003*	0.0597343*	-0.0218534*	0.0114717*	0.0974627*	0.000217*	0.0402308*	0.0210924*
-6.67999*	0.0761375*	-0.0124841*	0.0231876*	0.110734*	0.000214*	0.0402279*	0.0351462*
-6.58002*	0.0581703*	-0.0226326*	0.0145969*	0.1084*	-0.00838*	0.0402317*	0.0343742*
-6.48004*	0.0722313*	-0.0179496*	0.00678*	0.113085*	-0.0161906*	0.0402298*	0.0406213*
-6.38*	0.0777016*	-0.0124826*	0.0231895*	0.11855*	0.000216*	0.0425739*	0.0523415*
-6.28003*	0.0698891*	-0.0124779*	0.03022*	0.112305*	0.00959*	0.0535107*	0.0523415*
-6.17999*	0.0675468*	-0.0343499*	0.00913*	0.104496*	0.00334*	0.0457001*	0.0445304*
-6.08002*	0.0566063*	-0.0335732*	0.0114689*	0.107616*	0.0103704*	0.0410099*	0.0562477*
-5.98004*	0.0441093*	-0.0452881*	0.00522*	0.102934*	0.0134969*	0.044136*	0.046875*
-5.88*	0.0581703*	-0.0382624*	0.014595*	0.100581*	0.0150594*	0.0535107*	0.0640602*
-5.78003*	0.0558281*	-0.0202961*	0.0325603*	0.118551*	0.0213052*	0.0574131*	0.0671825*
-5.67999*	0.0464516*	-0.0202846*	0.0325642*	0.0990295*	0.0228719*	0.0503864*	0.0640659*
-5.58002*	0.0347328*	-0.0109138*	0.0403767*	0.108398*	0.0174031*	0.0652294*	0.0624962*
-5.48004*	0.0448875*	-0.0117059*	0.0411506*	0.124797*	0.0181829*	0.0683537*	0.0726447*
-5.38*	0.0386391*	-0.00076*	0.0536575*	0.109179*	0.0228719*	0.0730419*	0.0835915*
-5.28003*	0.0362968*	-0.00154*	0.0497546*	0.104496*	0.0174061*	0.0675769*	0.0750022*
-5.17999*	0.0269203*	-0.0101371*	0.0403767*	0.106835*	0.0314656*	0.0792923*	0.0859323*
-5.08002*	0.0191078*	0.000805*	0.0442829*	0.118555*	0.0463094*	0.0847607*	0.0953102*
-4.98004*	0.00739*	0.00158*	0.0325642*	0.113087*	0.0408406*	0.0933552*	0.0890617*
-4.88*	0.0175438*	0.00158*	0.031002*	0.116206*	0.0431844*	0.0988235*	0.0937462*
-4.78003*	0.0308266*	0.0125165*	0.0458379*	0.110735*	0.0525522*	0.0910039*	0.107022*
-4.67999*	0.0245781*	0.00939*	0.0481892*	0.109176*	0.0525594*	0.0964794*	0.0929632*
-4.58002*	0.00973*	0.0187721*	0.0520954*	0.118555*	0.0525594*	0.0816364*	0.091404*
-4.48004*	0.0167656*	0.0187674*	0.0481844*	0.106832*	0.0486531*	0.0871048*	0.0913992*
-4.38*	0.0253563*	0.018765*	0.0599079*	0.108391*	0.0525594*	0.0988235*	0.0937462*
-4.28003*	0.00739*	0.0289207*	0.0528693*	0.0974536*	0.0447391*	0.10116*	0.09374*
-4.17999*	-0.0121422*	0.00862*	0.0560017*	0.0912104*	0.0431844*	0.0933552*	0.077342*
-4.08002*	-0.0137062*	-0.000759*	0.0442829*	0.0716801*	0.0447469*	0.0949173*	0.0718727*
-3.98004*	-0.0199547*	0.00938*	0.0638022*	0.0794806*	0.0525594*	0.10273*	0.074203*
-3.88*	-0.0183907*	0.0242352*	0.0560017*	0.0693288*	0.0447469*	0.10273*	0.0874977*
-3.78003*	-0.0394859*	0.0109596*	0.045845*	0.0482426*	0.0330281*	0.0949173*	0.0679665*
-3.67999*	-0.0535469*	0.00705*	0.0520954*	0.0505819*	0.0345906*	0.0925732*	0.0640554*
-3.58002*	-0.0644875*	-0.000759*	0.0638142*	0.0599613*	0.0408406*	0.110542*	0.0562477*
-3.48004*	-0.0832329*	-0.0109124*	0.0497546*	0.0537143*	0.0213109*	0.100388*	0.0367179*
-3.38*	-0.10355*	-0.0218534*	0.031002*	0.056056*	0.0291219*	0.0894489*	0.0328102*
-3.28003*	-0.101986*	-0.0202975*	0.0442758*	0.0482354*	0.0345834*	0.102723*	0.0265546*
-3.17999*	-0.108234*	-0.0320091*	0.0325642*	0.0505867*	0.0314656*	0.091011*	0.0249977*
-3.08002*	-0.0957375*	-0.0218544*	0.0333443*	0.0583973*	0.0470891*	0.0988216*	0.0312462*
-2.98004*	-0.125423*	-0.0499711*	0.0224147*	0.051374*	0.0189672*	0.0769501*	-0.00859*
-2.88*	-0.138706*	-0.0492058*	0.028656*	0.0372963*	0.0236516*	0.0699158*	-0.0156288*
-2.78003*	-0.134014*	-0.0460839*	0.0481772*	0.0458865*	0.0345783*	0.07303*	-0.0101724*
-2.67999*	-0.138706*	-0.0632677*	0.0560017*	0.0287027*	0.0314656*	0.0675735*	-0.0257921*
-2.58002*	-0.152767*	-0.0593529*	0.0638142*	0.00527*	0.0345906*	0.0558548*	-0.0437508*
-2.48004*	-0.158237*	-0.0687428*	0.0739555*	-0.0103664*	0.0314641*	0.042572*	-0.0429859*
-2.38*	-0.131672*	-0.0265646*	0.0981903*	0.020093*	0.0463109*	0.0636692*	0.00937*
-2.28003*	-0.131672*	0.00313*	0.113018*	0.0115085*	0.0587937*	0.0808387*	0.0367007*
-2.17999*	-0.163708*	0.0109653*	0.110687*	-0.0431595*	0.0408391*	0.0644474*	0.0351582*
-2.08002*	-0.172298*	0.0383034*	0.109127*	-0.0517578*	0.0213094*	0.091011*	0.044529*
-1.98004*	-0.151203*	0.0406456*	0.100533*	-0.0431633*	0.00725*	0.127729*	0.0578117*
-1.88*	-0.169956*	0.0344067*	0.0638142*	-0.0673733*	-0.0177531*	0.091011*	0.0664024*
-1.78003*	-0.156673*	0.052351*	0.0762997*	-0.0353661*	0.0220758*	0.112871*	0.0820141*
-1.67999*	-0.159016*	0.0711131*	0.0864716*	0.000583*	0.0345922*	0.144918*	0.12812*
-1.58002*	-0.148861*	0.0734596*	0.0817833*	0.0294933*	0.0603719*	0.163668*	0.174999*
-1.48004*	-0.162144*	0.0617657*	0.13415*	0.0599842*	0.0627141*	0.176947*	0.19924*
-1.38*	-0.144955*	0.0344248*	0.134127*	0.0873327*	0.0861531*	0.179293*	0.207027*
-1.28003*	-0.137142*	0.0719266*	0.136502*	0.0638985*	0.0775903*	0.178542*	0.239872*
-1.17999*	-0.0980797*	0.0672412*	0.16069*	0.0146804*	0.0892797*	0.141012*	0.189872*
-1.08002*	-0.0512047*	0.0851784*	0.173187*	0.0169907*	0.113495*	0.14179*	0.195309*
-0.980042*	-0.0238609*	0.120331*	0.261467*	0.0615201*	0.147872*	0.17148*	0.251557*
-0.880005*	0.0253563*	0.169555*	0.329437*	0.0990252*	0.199433*	0.208197*	0.296871*
-0.780029*	0.068325*	0.132076*	0.295868*	0.0263901*	0.10727*	0.112127*	0.23127*
-0.679993*	0.101139*	0.0453324*	0.223969*	-0.0298858*	0.0564641*	0.0363216*	0.14609*
-0.580017*	0.12458*	-0.0648193*	0.163815*	0.00215*	0.0994351*	0.0386677*	0.0976563*
-0.480042*	0.126919*	-0.182054*	0.0950184*	-0.0572719*	0.0603703*	0.0246029*	0.103079*
-0.380005*	0.251141*	-0.0218863*	0.143501*	0.360711*	0.0947468*	0.0144482*	0.0671844*
-0.280029*	-0.115265*	0.511829*	0.334215*	1.34599*	0.383898*	0.438756*	0.615711*
-0.179993*	-0.410583*	0.342038*	0.359125*	0.994947*	0.593965*	0.541792*	0.683421*
-0.0800171*	0.000355*	0.333614*	0.340376*	0.640429*	0.790839*	0.355853*	0.494528*
0.0199585	1.9152	0.899295	0.377149	0.010015	0.637717	0.31445	0.394584
0.119995	5.62145	1.29131	1.05131	-0.836255	1.06115	-0.411333	0.00937
0.219971	8.62535	2.39052	1.38947	0.43796	1.20087	0.0861971	0.404557
0.320007	8.21911	2.97107	1.15209	1.41226	0.844746	0.760542	0.85308
0.419983	7.38552	2.65315	1.23413	0.88418	0.637716	0.607417	0.686718
0.519958	5.8363	1.68482	0.700178	0.338512	0.211152	0.0597601	0.0637053
0.619995	4.00583	1.0111	0.231001	0.314791	0.20412	-0.0214901	0.0984344
0.719971	2.32927	0.25719	0.011609	0.249162	0.140197	-0.138538	0.025134
0.820007	1.16208	-0.282736	-0.190872	0.148298	0.159591	-0.0722694	0.0516148
0.919983	0.130047	-0.703102	-0.44556	0.0287113	0.118966	-0.0800829	0.0476532
1.01996	-0.573856	-0.971027	-0.66036	-0.0501519	0.0877172	-0.0550814	0.0695724
1.12	-0.864487	-1.26633	-0.798685	-0.165764	0.0713102	-0.0425816	0.0359344
1.21997	-1.34417	-1.51633	-0.96426	-0.225145	0.0354218	-0.0370636	-0.00776
1.32001	-1.48167	-1.54683	-1.02447	-0.294702	0.0283399	-0.00508	-0.0257578
1.41998	-1.32621	-1.43826	-1.07056	-0.287695	0.0252156	0.0425739	-0.0140648
1.51996	-0.893391	-1.37495	-1.10179	-0.31189	0.0369359	0.0925751	-0.0281029
1.62	-0.366833	-1.28199	-1.10572	-0.290017	0.0564656	0.0956984	-0.0453148
1.71997	0.226925	-1.16949	-1.07836	-0.28768	0.0697617	0.117588	-0.0609264
1.82001	1.05896	-0.939791	-1.09009	-0.304071	0.0892797	0.0949192	-0.0765362
1.91998	1.86442	-0.57576	-1.019	-0.289259	0.11037	0.0792904	-0.0703163
2.01996	3.01599	-0.210914	-0.941652	-0.247068	0.163498	0.0886688	-0.055469
2.12	4.18161	0.187524	-0.829935	-0.178319	0.197091	0.101168	-0.0429726
2.21997	5.22614	0.610179	-0.711966	-0.11035	0.232249	0.0894504	-0.0195317
2.32001	6.60036	1.07815	-0.586184	-0.0556617	0.259592	0.0824184	0.0171857
2.41998	8.26207	1.5883	-0.447123	0.0208988	0.292403	0.075386	0.0406227
2.51996	9.90505	2.118	-0.339301	0.0732527	0.306467	0.0636692	0.0601625
2.62	11.6535	2.66878	-0.157282	0.124813	0.330683	0.0464783	0.0585899
2.71997	13.4035	3.29612	0.0685029	0.194338	0.374436	0.0480447	0.0671868
2.82001	15.2004	3.97033	0.276312	0.263084	0.431464	0.058197	0.0960898
2.91998	17.091	4.68127	0.484907	0.358398	0.476778	0.0769482	0.130466
3.01996	19.2738	5.39143	0.727093	0.450585	0.524436	0.0925751	0.134371
3.12	21.434	6.13441	0.959127	0.512313	0.538498	0.110544	0.135937
3.21997	23.6457	6.87425	1.1857	0.591219	0.564286	0.108206	0.12813
3.32001	25.9785	7.63908	1.43881	0.681052	0.600214	0.126947	0.128901
3.41998	28.3019	8.4719	1.67006	0.793556	0.640061	0.143356	0.122656
3.51996	30.7027	9.268	1.89194	0.881061	0.66037	0.150385	0.114846
3.62	33.1543	10.0485	2.14663	0.984968	0.68303	0.152731	0.114843
3.71997	35.6683	10.8516	2.45444	1.07012	0.707247	0.167574	0.114841
3.82001	38.2019	11.668	2.73725	1.19433	0.761153	0.161324	0.128901
3.91998	40.7988	12.4836	3.02397	1.30371	0.788498	0.1707	0.126562
4.01996	43.4285	13.2828	3.2896	1.41309	0.820528	0.161324	0.126566
4.12	46.0261	14.1016	3.55757	1.48574	0.847091	0.16523	0.122654
4.21997	48.6941	14.9016	3.83257	1.56153	0.884598	0.155081	0.110161
4.32001	51.448	15.7446	4.10991	1.65919	0.905684	0.144136	0.103128
4.41998	54.1832	16.6672	4.40991	1.76777	0.945527	0.148041	0.0898399
4.51996	56.8722	17.5938	4.72319	1.86855	0.982247	0.153511	0.0929627
4.62	59.5801	18.5235	5.01069	1.97559	1.03928	0.161324	0.0835915
4.71997	62.3449	19.4617	5.29975	2.07324	1.08381	0.173042	0.0820293
4.82001	65.0324	20.3969	5.63178	2.19511	1.15178	0.184761	0.0851464
4.91998	67.6949	21.3399	5.96772	2.2959	1.17365	0.19648	0.075779
5.01996	70.4183	22.2875	6.29194	2.39981	1.21272	0.19648	0.0640602
5.12	73.1488	23.2696	6.65132	2.49277	1.26662	0.209763	0.0679684
5.21997	75.8433	24.2469	7.0107	2.61075	1.2971	0.212111	0.0523472
5.32001	78.4613	25.2156	7.36303	2.72246	1.34553	0.218353	0.0507784
5.41998	81.0004	26.2016	7.68413	2.83731	1.36115	0.223824	0.0343723
5.51996	83.5902	27.1883	8.04038	2.9459	1.41037	0.229292	0.0249977
5.62	86.0113	28.15	8.40522	3.07168	1.4385	0.237106	0.0226555
5.71997	88.4183	29.1258	8.77632	3.18497	1.45725	0.239454	0.0132847
5.82001	90.8519	30.1157	9.16303	3.31152	1.49943	0.251167	0.0117168
5.91998	93.2879	31.1453	9.50756	3.43496	1.52912	0.261322	0.00781
6.01996	95.4636	32.1805	9.83256	3.54433	1.55881	0.29023	0.0226479
6.12	97.6386	33.2227	10.1943	3.6787	1.62209	0.323044	0.0265617
6.21997	99.798	34.2453	10.5224	3.79981	1.64866	0.329296	0.0328135
6.32001	101.957	35.2938	10.8451	3.90059	1.70881	0.335541	0.029685
6.41998	104.026	36.3344	11.1708	4.01465	1.73068	0.358198	0.00312
6.51996	105.925	37.3875	11.5247	4.13808	1.7924	0.360542	0.00546
6.62	107.733	38.436	11.8505	4.27637	1.83225	0.378511	0.00312
6.71997	109.565	39.4969	12.1787	4.38809	1.88459	0.380074	-0.00782
6.82001	111.286	40.5477	12.4912	4.49512	1.94475	0.38398	-0.0140648
6.91998	112.919	41.643	12.8326	4.61621	1.98147	0.402731	-0.014843
7.01996	114.481	42.7133	13.1654	4.73028	2.02756	0.398043	-0.037499
7.12	115.995	43.7766	13.5248	4.85449	2.06975	0.397261	-0.0375023
7.21997	117.497	44.8446	13.8974	4.9623	2.11974	0.408196	-0.0351615
7.32001	118.853	45.8914	14.2748	5.09511	2.17131	0.428511	-0.0273533
7.41998	120.188	46.9828	14.6474	5.23731	2.22053	0.430075	-0.032032
7.51996	121.489	48.093	15.013	5.35527	2.30256	0.44726	-0.0257888
7.62	122.823	49.182	15.3794	5.50683	2.34944	0.469137	-0.0281258
7.71997	124.061	50.2914	15.7591	5.61074	2.39787	0.476164	-0.0390701
7.82001	125.17	51.3899	16.1169	5.72402	2.43928	0.489447	-0.0453162
7.91998	126.259	52.5055	16.4896	5.84746	2.49865	0.50976	-0.0390663
8.01996	127.292	53.6141	16.8568	5.97792	2.54865	0.522261	-0.0453205
8.12	128.343	54.6875	17.2373	6.08652	2.58537	0.5207	-0.0437508
8.21997	129.401	55.7922	17.6138	6.19277	2.65802	0.537882	-0.0398483
8.32001	130.265	56.9016	17.9763	6.31386	2.71271	0.550385	-0.0484443
8.41998	131.22	58.0532	18.3443	6.41699	2.77053	0.569138	-0.0437508
8.51996	132.019	59.1477	18.7013	6.53495	2.81896	0.581635	-0.04532
8.62	132.852	60.25	19.0646	6.66464	2.8799	0.612106	-0.0359383
8.71997	133.638	61.3391	19.413	6.76308	2.93771	0.626163	-0.0296936
8.82001	134.461	62.4211	19.7888	6.8748	2.99006	0.632416	-0.028913
8.91998	135.245	63.5008	20.1458	6.98574	3.03928	0.661324	-0.0281258
9.01996	136.011	64.6078	20.4849	7.11777	3.09084	0.672262	-0.0359392
9.12	136.67	65.6828	20.8552	7.22245	3.14084	0.677729	-0.0273476
9.21997	137.331	66.8039	21.2372	7.36464	3.20724	0.698036	-0.020319
9.32001	137.943	67.8641	21.6068	7.48808	3.25178	0.700384	-0.0171943
9.41998	138.538	68.9438	21.9896	7.6084	3.2924	0.731638	-0.00312
9.51996	139.146	69.9656	22.3583	7.73574	3.33928	0.739449	-0.00782
9.62	139.691	71.007	22.7294	7.84277	3.39475	0.751167	-0.0125008
9.71997	140.22	72.0734	23.1068	7.96855	3.44864	0.770689	-0.00783
9.82001	140.742	73.1297	23.4779	8.1084	3.50022	0.787886	-0.0140648
9.91998	141.244	74.1906	23.8513	8.23808	3.53146	0.79101	-0.0140648
10.02	141.733	75.2469	24.2201	8.37246	3.58147	0.799604	-0.0179768
10.12	142.185	76.2914	24.5904	8.47949	3.65959	0.803513	-0.0203133
10.22	142.666	77.3711	24.9802	8.59902	3.71505	0.830067	-0.0117278
10.32	143.135	78.4445	25.363	8.72636	3.78146	0.852728	-0.00235
10.42	143.594	79.5282	25.7607	8.86856	3.84084	0.873825	0.014843
10.52	144.029	80.6024	26.138	9.01621	3.89865	0.887886	0.0195236
10.62	144.484	81.6774	26.5287	9.14824	3.93146	0.899603	0.0156212
10.72	144.91	82.757	26.9076	9.3162	3.98771	0.917568	0.024992
10.82	145.286	83.8156	27.2904	9.44668	4.03928	0.930855	0.0343742
10.92	145.653	84.8828	27.6919	9.55918	4.08928	0.949606	0.0249977
11.02	146.071	85.9211	28.0951	9.70449	4.14006	0.964449	0.0226517
11.12	146.439	86.9602	28.4857	9.81387	4.16584	0.969917	0.013279
11.22	146.832	87.986	28.8787	9.94668	4.21115	0.989445	0.019526
11.32	147.195	89.0125	29.2763	10.0975	4.2674	1.00898	0.0132732
11.42	147.562	89.9992	29.638	10.2201	4.31037	1.02695	0.0117149
11.52	147.892	90.9953	30.013	10.3451	4.35725	1.0496	0.014843
11.62	148.243	91.9969	30.4013	10.4693	4.43459	1.06367	0.016407
11.72	148.593	92.9953	30.8005	10.6076	4.49083	1.08554	0.0140519
11.82	148.975	93.9438	31.1998	10.7193	4.55178	1.11601	0.0187426
11.92	149.268	94.9055	31.5951	10.8545	4.59787	1.13945	0.0226555
12.02	149.531	95.8508	31.9896	10.9787	4.64865	1.15195	0.0140557
12.12	149.814	96.7945	32.3787	11.117	4.7049	1.1832	0.0195274
12.22	150.093	97.7336	32.7708	11.249	4.77287	1.20975	0.026556
12.32	150.345	98.6547	33.1724	11.3701	4.81428	1.2332	0.0265608
12.42	150.618	99.55	33.556	11.4936	4.85725	1.25742	0.0328102
12.52	150.859	100.463	33.9349	11.6186	4.89006	1.26835	0.0312462
12.62	151.118	101.359	34.3193	11.7568	4.951	1.27695	0.0343742
12.72	151.33	102.271	34.7083	11.8865	5.00256	1.28241	0.0249963
12.82	151.589	103.122	35.1068	12.0287	5.07131	1.32148	0.0406113
12.92	151.794	103.989	35.4755	12.1732	5.13615	1.33867	0.0367165
13.02	152.002	104.822	35.8412	12.2889	5.17209	1.34101	0.025001
13.12	152.237	105.651	36.2138	12.4381	5.24006	1.36836	0.0343742
13.22	152.443	106.472	36.5872	12.5756	5.29083	1.38788	0.0413957
13.32	152.663	107.304	36.9779	12.7256	5.351	1.40742	0.0554628
13.42	152.875	108.13	37.349	12.8436	5.40881	1.42929	0.0531197
13.52	153.086	108.943	37.7615	12.9904	5.48225	1.4621	0.0781069
13.62	153.275	109.739	38.1591	13.1178	5.53303	1.48007	0.0851555
13.72	153.464	110.473	38.5513	13.2396	5.56975	1.49257	0.0749998
13.82	153.675	111.193	38.9412	13.3982	5.60959	1.52148	0.0742097
13.92	153.857	111.889	39.3255	13.5084	5.64162	1.53398	0.0835915
14.02	154.07	112.606	39.7583	13.6537	5.70725	1.57148	0.0952992
14.12	154.243	113.327	40.1638	13.7748	5.75959	1.58867	0.092968
14.22	154.425	113.995	40.5677	13.8982	5.82443	1.60116	0.0843682
14.32	154.581	114.692	40.9794	14.0185	5.90178	1.62148	0.0968676
14.42	154.73	115.388	41.4052	14.1459	5.93693	1.63632	0.10078
14.52	154.916	116.017	41.8185	14.2771	5.9924	1.6496	0.0921807
14.62	155.082	116.571	42.2107	14.4092	6.06271	1.6582	0.0835915
14.72	155.242	117.191	42.6294	14.5482	6.14396	1.68241	0.0968676
14.82	155.411	117.776	43.0482	14.6732	6.22678	1.71601	0.101555
14.92	155.564	118.359	43.4779	14.7928	6.28303	1.7082	0.0953102
15.02	155.743	118.945	43.9029	14.9482	6.34162	1.73945	0.102338
15.12	155.882	119.521	44.3123	15.0771	6.39787	1.75664	0.109371
15.22	156.035	120.081	44.7083	15.2068	6.4299	1.76132	0.103121
15.32	156.177	120.682	45.106	15.335	6.501	1.78789	0.114835
15.42	156.332	121.238	45.5255	15.4646	6.55725	1.80038	0.114841
15.52	156.474	121.735	45.9287	15.5982	6.6299	1.81914	0.124211
15.62	156.617	122.196	46.3583	15.7318	6.69553	1.81523	0.130466
15.72	156.744	122.698	46.7849	15.8553	6.72834	1.81991	0.131243
15.82	156.872	123.183	47.181	15.9678	6.78147	1.83945	0.135936
15.92	156.984	123.624	47.599	16.1076	6.81428	1.85273	0.128902
16.02	157.117	124.102	47.9857	16.2412	6.85334	1.86445	0.138273
16.12	157.245	124.538	48.3935	16.3584	6.92287	1.88554	0.139843
16.22	157.365	124.92	48.8255	16.4764	6.99083	1.8996	0.148428
16.32	157.517	125.352	49.2505	16.6201	7.0635	1.91914	0.164838
16.42	157.65	125.77	49.6873	16.7498	7.11975	1.94101	0.164059
16.52	157.775	126.192	50.1005	16.8795	7.1635	1.97539	0.185147
16.62	157.871	126.55	50.5466	17.031	7.23224	1.98945	0.187496
16.72	157.964	126.907	50.9498	17.1771	7.27678	1.99726	0.184376
16.82	158.058	127.263	51.3646	17.3271	7.32053	2.03085	0.183585
16.92	158.16	127.627	51.8044	17.4529	7.37912	2.05742	0.200779
17.02	158.221	127.96	52.2294	17.599	7.44318	2.0621	0.201556
17.12	158.303	128.335	52.6771	17.7475	7.49553	2.07929	0.217968
17.22	158.4	128.688	53.1068	17.8881	7.56036	2.09335	0.224211
17.32	158.486	129.016	53.5263	18.0482	7.63225	2.12148	0.225774
17.42	158.55	129.339	53.9443	18.2061	7.69553	2.13789	0.239841
17.52	158.607	129.598	54.374	18.3334	7.74943	2.1496	0.249996
17.62	158.644	129.869	54.7951	18.4662	7.79943	2.1582	0.243748
17.72	158.704	130.131	55.2193	18.599	7.84475	2.18632	0.237497
17.82	158.765	130.399	55.656	18.7381	7.90256	2.2121	0.257803
17.92	158.838	130.662	56.0912	18.8631	7.94943	2.22226	0.27734
18.02	158.914	130.927	56.531	19.0303	8.01193	2.25273	0.286711
18.12	158.983	131.204	56.9615	19.142	8.0674	2.27226	0.298435
18.22	159.043	131.46	57.3779	19.2881	8.12052	2.28866	0.303902
18.32	159.105	131.726	57.8177	19.41	8.17053	2.30429	0.29687
18.42	159.181	132.01	58.2591	19.5201	8.21194	2.3207	0.30547
18.52	159.251	132.253	58.7083	19.6443	8.27756	2.33554	0.300774
18.62	159.325	132.491	59.1576	19.7771	8.31037	2.36054	0.304684
18.72	159.388	132.723	59.6029	19.9193	8.36505	2.38397	0.315616
18.82	159.466	132.941	60.0474	20.0592	8.44865	2.43086	0.323426
18.92	159.557	133.173	60.4748	20.2146	8.49787	2.45038	0.342182
19.02	159.638	133.4	60.931	20.3475	8.58068	2.47226	0.347645
19.12	159.714	133.631	61.3794	20.4811	8.64397	2.51289	0.366405
19.22	159.765	133.823	61.8154	20.6248	8.70881	2.53788	0.382027
19.32	159.832	134.017	62.2365	20.7787	8.74006	2.55976	0.373431
19.42	159.868	134.243	62.6708	20.9334	8.81037	2.58164	0.389843
19.52	159.901	134.424	63.1005	21.0803	8.8549	2.60429	0.39765
19.62	159.934	134.58	63.5482	21.2068	8.91037	2.64179	0.404682
19.72	159.987	134.752	63.9779	21.349	8.97365	2.66132	0.421086
19.82	160.031	134.938	64.4193	21.4975	9.02756	2.69257	0.432808
19.92	160.05	135.107	64.8724	21.6186	9.05881	2.70273	0.423435
20.02	160.084	135.253	65.3372	21.76	9.10568	2.73945	0.424206
20.12	160.136	135.401	65.7904	21.9107	9.18459	2.76445	0.436718
20.22	160.183	135.552	66.2216	22.0615	9.2424	2.80194	0.444524
20.32	160.232	135.74	66.6888	22.2365	9.32209	2.83554	0.463265
20.42	160.241	135.902	67.156	22.3881	9.3924	2.86054	0.478123
20.52	160.239	136.049	67.5998	22.5068	9.43147	2.86757	0.473444
20.62	160.263	136.216	68.0623	22.6412	9.48537	2.89414	0.47031
20.72	160.279	136.352	68.5037	22.7756	9.50646	2.90741	0.480464
20.82	160.308	136.475	68.9482	22.917	9.56975	2.92539	0.474211
20.92	160.298	136.619	69.3779	23.0248	9.59006	2.93085	0.471874
21.02	160.324	136.755	69.8021	23.1537	9.64396	2.95195	0.464838
21.12	160.341	136.807	70.263	23.2943	9.71897	2.98789	0.482029
21.22	160.322	136.861	70.699	23.4061	9.74944	2.98945	0.462503
21.32	160.354	136.989	71.1607	23.5381	9.81037	3.02226	0.47421
21.42	160.371	137.07	71.5872	23.6553	9.85725	3.04648	0.471874
21.52	160.406	137.196	72.0091	23.7772	9.87287	3.06367	0.463279
21.62	160.437	137.327	72.4544	23.917	9.92912	3.08242	0.477345
21.72	160.476	137.456	72.9115	24.0623	9.96896	3.10741	0.48593
21.82	160.493	137.562	73.3607	24.2279	10.0502	3.13789	0.485929
21.92	160.515	137.664	73.8115	24.3584	10.1088	3.14101	0.493748
22.02	160.543	137.777	74.2498	24.4842	10.1588	3.1582	0.482031
22.12	160.57	137.889	74.7255	24.6264	10.2299	3.17851	0.480465
22.22	160.583	137.948	75.1576	24.7686	10.2697	3.19882	0.483593
22.32	160.587	138.046	75.6044	24.9014	10.3158	3.20585	0.476561
22.42	160.621	138.144	76.0599	25.0443	10.369	3.23945	0.483593
22.52	160.623	138.226	76.5287	25.1779	10.4041	3.25351	0.486712
22.62	160.614	138.313	76.9755	25.3209	10.4627	3.26836	0.477345
22.72	160.638	138.405	77.4076	25.4568	10.5291	3.29022	0.482024
22.82	160.666	138.509	77.8708	25.5912	10.6018	3.31211	0.496082
22.92	160.703	138.609	78.3271	25.7436	10.6791	3.3582	0.505466
23.02	160.708	138.695	78.763	25.892	10.7205	3.36992	0.514841
23.12	160.728	138.783	79.2302	26.0467	10.7791	3.40585	0.535152
23.22	160.757	138.842	79.6919	26.1904	10.8299	3.43085	0.544522
23.32	160.778	138.915	80.1341	26.3115	10.8846	3.45585	0.540621
23.42	160.805	138.994	80.5935	26.4709	10.9432	3.48788	0.570309
23.52	160.823	139.071	81.0185	26.6185	10.9924	3.49961	0.577337
23.62	160.833	139.11	81.4521	26.7545	11.0557	3.52382	0.577343
23.72	160.842	139.163	81.8997	26.8881	11.1135	3.55819	0.584364
23.82	160.833	139.222	82.3372	27.0248	11.1604	3.56914	0.587499
23.92	160.836	139.276	82.7904	27.16	11.2065	3.59101	0.596874
24.02	160.842	139.313	83.2474	27.3084	11.2424	3.5996	0.593742
24.12	160.837	139.402	83.6849	27.4279	11.3018	3.62148	0.614063
24.22	160.875	139.478	84.1263	27.5568	11.358	3.64804	0.621085
24.32	160.894	139.554	84.5693	27.7084	11.4213	3.66132	0.634365
24.42	160.902	139.62	85.0154	27.8779	11.4768	3.67851	0.661716
24.52	160.897	139.674	85.4302	27.9897	11.5127	3.68867	0.665627
24.62	160.906	139.732	85.8591	28.1303	11.5612	3.7121	0.667965
24.72	160.914	139.816	86.2982	28.2771	11.6033	3.73006	0.685147
24.82	160.914	139.878	86.7419	28.4232	11.6565	3.74492	0.700771
24.92	160.935	139.946	87.1544	28.5693	11.7237	3.76836	0.716404
25.02	160.932	140.007	87.588	28.7006	11.7908	3.77929	0.724211
25.12	160.944	140.083	88.0083	28.8271	11.8432	3.8207	0.735935
25.22	160.939	140.124	88.4271	28.9553	11.8776	3.82617	0.726561
25.32	160.933	140.183	88.849	29.1295	11.9447	3.84101	0.745304
25.42	160.943	140.255	89.2888	29.2678	11.9987	3.87226	0.764057
25.52	160.929	140.358	89.7099	29.4303	12.044	3.89101	0.774213
25.62	160.911	140.43	90.138	29.5717	12.1072	3.89414	0.78281
25.72	160.898	140.47	90.5677	29.717	12.1705	3.90585	0.785151
25.82	160.884	140.524	90.9818	29.8701	12.2143	3.90117	0.798434
25.92	160.884	140.583	91.413	30.0006	12.2651	3.9207	0.797657
26.02	160.89	140.623	91.8294	30.1271	12.3221	3.93163	0.796866
26.12	160.871	140.675	92.2458	30.2865	12.3713	3.95429	0.812496
26.22	160.863	140.716	92.6591	30.4209	12.4408	3.97148	0.817966
26.32	160.843	140.734	93.0638	30.5272	12.4807	3.97148	0.807817
26.42	160.85	140.794	93.4951	30.667	12.5502	3.98789	0.820309
26.52	160.83	140.838	93.8888	30.7967	12.6018	4.00117	0.816401
26.62	160.833	140.885	94.313	30.9303	12.6737	4.0207	0.83672
26.72	160.826	140.923	94.7224	31.0935	12.7322	4.04257	0.835928
26.82	160.845	140.975	95.1216	31.2396	12.7908	4.0707	0.846868
26.92	160.833	141.033	95.531	31.367	12.8612	4.0996	0.873432
27.02	160.82	141.063	95.9193	31.5084	12.9096	4.11992	0.874212
27.12	160.796	141.102	96.3232	31.6475	12.9627	4.13945	0.878124
27.22	160.789	141.136	96.7318	31.8084	12.9994	4.14726	0.882805
27.32	160.771	141.183	97.1123	31.9568	13.0299	4.1582	0.878908
27.42	160.776	141.247	97.5287	32.1412	13.0947	4.20351	0.907032
27.52	160.755	141.273	97.8998	32.2943	13.1291	4.2082	0.903907
27.62	160.726	141.309	98.2959	32.4428	13.1869	4.23789	0.909374
27.72	160.696	141.343	98.6771	32.585	13.2362	4.24882	0.898434
27.82	160.675	141.382	99.056	32.7123	13.2768	4.26523	0.901562
27.92	160.65	141.404	99.4685	32.8576	13.3307	4.27851	0.900776
28.02	160.642	141.464	99.8482	33.0186	13.3901	4.30976	0.903898
28.12	160.645	141.513	100.25	33.1693	13.4401	4.34101	0.915623
28.22	160.645	141.538	100.64	33.3295	13.4932	4.36054	0.927335
28.32	160.643	141.588	101.031	33.4764	13.5432	4.39023	0.935149
28.42	160.636	141.627	101.399	33.6084	13.6205	4.41289	0.948437
28.52	160.605	141.663	101.754	33.7256	13.6502	4.44804	0.94844
28.62	160.586	141.71	102.118	33.8529	13.7065	4.46445	0.949215
28.72	160.574	141.741	102.486	33.9857	13.7502	4.48945	0.95312
28.82	160.558	141.784	102.868	34.1443	13.8166	4.50742	0.96015
28.92	160.55	141.823	103.24	34.2943	13.8588	4.53789	0.960934
29.02	160.521	141.862	103.589	34.4186	13.9096	4.56133	0.961719
29.12	160.501	141.904	103.968	34.5662	13.969	4.59726	0.95937
29.22	160.488	141.952	104.314	34.7264	14.0158	4.61835	0.971869
29.32	160.464	141.995	104.659	34.8522	14.0541	4.62148	0.964066
29.42	160.461	142.023	105.01	34.9959	14.119	4.6582	0.962498
29.52	160.462	142.063	105.382	35.1576	14.1682	4.68085	0.972647
29.62	160.451	142.095	105.73	35.2982	14.2322	4.70273	0.976559
29.72	160.435	142.116	106.079	35.4389	14.2697	4.72929	0.971876
29.82	160.413	142.169	106.433	35.5967	14.3158	4.73945	0.974216
29.92	160.403	142.195	106.761	35.7404	14.3729	4.75351	0.966404
30.02	160.407	142.235	107.112	35.881	14.433	4.78164	0.975774
30.12	160.423	142.277	107.464	35.9982	14.4885	4.8121	0.982807
30.22	160.412	142.305	107.816	36.1475	14.533	4.83866	0.995306
30.32	160.4	142.338	108.165	36.2811	14.5932	4.86289	0.985933
30.42	160.403	142.364	108.52	36.4482	14.6682	4.89179	0.991405
30.52	160.393	142.377	108.847	36.5881	14.7229	4.91132	0.971094
30.62	160.384	142.424	109.19	36.7389	14.794	4.93086	0.985157
30.72	160.364	142.456	109.509	36.8764	14.8205	4.94023	0.984372
30.82	160.355	142.497	109.843	37.0107	14.8549	4.97226	0.987497
30.92	160.353	142.543	110.148	37.1584	14.9338	5.00117	1.00624
31.02	160.343	142.575	110.47	37.3115	14.9901	5.03242	1.01484
31.12	160.324	142.596	110.804	37.4365	15.0244	5.04961	1.00703
31.22	160.316	142.625	111.133	37.6209	15.0822	5.0621	1.01327
31.32	160.302	142.655	111.442	37.7764	15.1307	5.07851	1.01328
31.42	160.282	142.679	111.743	37.9131	15.1893	5.09336	1.01875
31.52	160.26	142.683	112.058	38.0568	15.2401	5.11054	1.02187
31.62	160.251	142.71	112.371	38.185	15.2971	5.11679	1.02266
31.72	160.243	142.726	112.683	38.3178	15.3557	5.14413	1.02577
31.82	160.237	142.743	112.999	38.4584	15.4057	5.16054	1.03593
31.92	160.234	142.759	113.283	38.6029	15.4729	5.17148	1.02734
32.02	160.218	142.788	113.636	38.7514	15.5166	5.20429	1.04843
32.12	160.209	142.812	113.944	38.8975	15.558	5.22929	1.04609
32.22	160.161	142.814	114.211	39.035	15.5807	5.22227	1.03282
32.32	160.152	142.834	114.511	39.167	15.6299	5.25117	1.0328
32.42	160.164	142.853	114.801	39.3201	15.6901	5.2707	1.04453
32.52	160.16	142.868	115.081	39.4795	15.7416	5.28789	1.05077
32.62	160.134	142.882	115.361	39.6209	15.783	5.28867	1.04609
32.72	160.144	142.891	115.646	39.7748	15.8338	5.32928	1.06014
32.82	160.136	142.895	115.926	39.9092	15.8502	5.34101	1.06484
32.92	160.127	142.928	116.224	40.0623	15.9229	5.36445	1.06797
33.02	160.136	142.954	116.511	40.2193	15.9822	5.39179	1.06952
33.12	160.132	142.964	116.773	40.367	16.051	5.41132	1.0875
33.22	160.134	143.003	117.041	40.5068	16.1026	5.43085	1.08671
33.32	160.111	143.017	117.308	40.6482	16.1487	5.45038	1.09218
33.42	160.103	143.055	117.568	40.7764	16.2112	5.46992	1.10703
33.52	160.107	143.066	117.816	40.9217	16.2651	5.49101	1.10859
33.62	160.114	143.085	118.101	41.1107	16.3104	5.51757	1.125
33.72	160.104	143.093	118.366	41.242	16.344	5.53632	1.125
33.82	160.092	143.102	118.65	41.4092	16.3979	5.56914	1.13202
33.92	160.087	143.114	118.872	41.5482	16.4416	5.58164	1.13671
34.02	160.093	143.161	119.141	41.6748	16.5033	5.59804	1.1453
34.12	160.082	143.162	119.379	41.8123	16.5408	5.60898	1.13437
34.22	160.086	143.177	119.622	41.9701	16.5838	5.6246	1.14452
34.32	160.079	143.202	119.882	42.1084	16.6424	5.65117	1.16561
34.42	160.068	143.234	120.129	42.26	16.6955	5.65976	1.16562
34.52	160.063	143.237	120.358	42.399	16.7377	5.66054	1.1539
34.62	160.049	143.253	120.609	42.5373	16.7737	5.68945	1.16406
34.72	160.054	143.265	120.849	42.6787	16.8182	5.70975	1.18515
34.82	160.04	143.264	121.054	42.8092	16.8666	5.72148	1.17891
34.92	160.015	143.266	121.281	42.9592	16.9494	5.7496	1.18515
35.02	159.997	143.255	121.521	43.0873	16.994	5.75898	1.18516
35.12	159.966	143.266	121.723	43.2334	17.0619	5.77304	1.19687
35.22	159.968	143.283	121.947	43.3865	17.1385	5.81131	1.21092
35.32	159.953	143.296	122.168	43.5404	17.2072	5.82929	1.21874
35.42	159.944	143.317	122.382	43.6826	17.2635	5.84883	1.22734
35.52	159.921	143.347	122.57	43.8553	17.3026	5.88007	1.23437
35.62	159.903	143.362	122.804	44.0342	17.394	5.9207	1.26719
35.72	159.892	143.361	123.023	44.2084	17.4627	5.93319	1.26718
35.82	159.861	143.343	123.202	44.3553	17.5197	5.95664	1.26328
35.92	159.855	143.337	123.423	44.5107	17.5737	5.9832	1.26484
36.02	159.845	143.355	123.633	44.66	17.6135	6.00742	1.27342
36.12	159.821	143.372	123.829	44.8271	17.6737	6.03398	1.29453
36.22	159.811	143.374	124.039	44.9592	17.7205	6.07147	1.30624
36.32	159.806	143.395	124.239	45.1217	17.7729	6.09258	1.31562
36.42	159.802	143.404	124.412	45.2693	17.8307	6.12695	1.32031
36.52	159.791	143.421	124.628	45.4271	17.8901	6.15117	1.32577
36.62	159.778	143.415	124.81	45.5522	17.9299	6.1496	1.33203
36.72	159.743	143.413	124.991	45.6787	17.9737	6.18086	1.325
36.82	159.732	143.437	125.191	45.81	18.0213	6.20038	1.33593
36.92	159.721	143.441	125.378	45.9584	18.0783	6.23007	1.35156
37.02	159.691	143.442	125.517	46.1053	18.119	6.24882	1.35469
37.12	159.665	143.43	125.694	46.2451	18.1557	6.24726	1.34922
37.22	159.64	143.455	125.861	46.41	18.2127	6.29178	1.36249
37.32	159.625	143.456	126.022	46.5717	18.2643	6.30273	1.36562
37.42	159.63	143.466	126.186	46.7139	18.3174	6.33242	1.36797
37.52	159.618	143.454	126.357	46.8467	18.3588	6.34726	1.36484
37.62	159.578	143.455	126.529	47.01	18.401	6.3746	1.37343
37.72	159.565	143.446	126.683	47.1686	18.4604	6.40507	1.37578
37.82	159.561	143.446	126.849	47.324	18.5041	6.43085	1.38671
37.92	159.544	143.452	126.978	47.4662	18.558	6.43867	1.39062
38.02	159.534	143.454	127.141	47.6162	18.6127	6.4582	1.38594
38.12	159.541	143.486	127.326	47.7475	18.6783	6.50117	1.41562
38.22	159.519	143.515	127.466	47.9061	18.7416	6.52069	1.41562
38.32	159.503	143.524	127.618	48.0248	18.7596	6.54804	1.43281
38.42	159.485	143.524	127.783	48.1709	18.808	6.55351	1.43125
38.52	159.473	143.545	127.939	48.349	18.8494	6.57929	1.44296
38.62	159.474	143.55	128.068	48.4975	18.8987	6.59726	1.4414
38.72	159.461	143.546	128.181	48.6342	18.9432	6.6082	1.44687
38.82	159.447	143.546	128.344	48.7678	18.9885	6.61913	1.45468
38.92	159.464	143.566	128.46	48.9014	19.0307	6.64179	1.45469
39.02	159.443	143.565	128.581	49.0318	19.0721	6.66289	1.47578
39.12	159.429	143.564	128.711	49.1584	19.1112	6.69257	1.48281
39.22	159.418	143.583	128.862	49.3092	19.1619	6.71366	1.49687
39.32	159.425	143.588	129.003	49.449	19.2127	6.74804	1.5039
39.42	159.406	143.601	129.144	49.6014	19.2533	6.78398	1.52734
39.52	159.398	143.628	129.312	49.7514	19.2994	6.80976	1.53671
39.62	159.37	143.639	129.464	49.892	19.3862	6.85273	1.55938
39.72	159.315	143.623	129.581	50.0186	19.4291	6.87226	1.54297
39.82	159.289	143.63	129.732	50.1381	19.4924	6.90117	1.54609
39.92	159.264	143.644	129.879	50.267	19.5549	6.93945	1.56484
40.02	159.259	143.644	129.97	50.4373	19.5955	6.95976	1.57343
40.12	159.224	143.645	130.073	50.5904	19.6338	6.97148	1.57734
40.22	159.216	143.655	130.208	50.7459	19.6776	6.9957	1.57968
40.32	159.189	143.666	130.319	50.8998	19.7112	7.00898	1.57421
40.42	159.151	143.677	130.439	51.0381	19.7846	7.04023	1.58359
40.52	159.14	143.684	130.562	51.1771	19.8416	7.05976	1.5953
40.62	159.118	143.681	130.661	51.324	19.8869	7.07929	1.60312
40.72	159.101	143.677	130.801	51.4795	19.9354	7.12225	1.62421
40.82	159.074	143.659	130.923	51.6092	19.9627	7.13164	1.60547
40.92	159.071	143.675	131.068	51.7764	20.0135	7.16757	1.62656
41.02	159.062	143.679	131.185	51.9232	20.0619	7.18476	1.63593
41.12	159.07	143.689	131.311	52.0685	20.1213	7.21992	1.64296
41.22	159.052	143.686	131.419	52.2115	20.1791	7.23944	1.65703
41.32	159.031	143.677	131.533	52.3498	20.2112	7.2707	1.66405
41.42	159.011	143.686	131.64	52.5006	20.2713	7.29023	1.67344
41.52	158.996	143.671	131.73	52.6381	20.3322	7.30976	1.68749
41.62	158.963	143.662	131.829	52.785	20.3901	7.32773	1.70234
41.72	158.957	143.659	131.953	52.9311	20.4197	7.35273	1.70468
41.82	158.943	143.669	132.042	53.0678	20.4705	7.37148	1.70468
41.92	158.931	143.649	132.12	53.2061	20.4955	7.38632	1.70078
42.02	158.907	143.632	132.197	53.3334	20.5276	7.40507	1.71016
42.12	158.883	143.634	132.289	53.4686	20.5604	7.41601	1.70156
42.22	158.87	143.626	132.391	53.6162	20.6205	7.45194	1.70624
42.32	158.857	143.624	132.505	53.7475	20.6877	7.46757	1.72187
42.42	158.822	143.615	132.578	53.9076	20.7283	7.47851	1.72265
42.52	158.792	143.597	132.669	54.0271	20.7697	7.47695	1.72265
42.62	158.777	143.575	132.767	54.1889	20.8119	7.48789	1.74141
42.72	158.771	143.554	132.861	54.3272	20.8393	7.49882	1.73046
42.82	158.741	143.528	132.911	54.4584	20.8807	7.50117	1.72735
42.92	158.714	143.529	133.001	54.6186	20.9299	7.5207	1.72656
43.02	158.704	143.516	133.099	54.7576	20.9721	7.53867	1.7414
43.12	158.672	143.498	133.191	54.8998	21.0041	7.55195	1.74453
43.22	158.647	143.489	133.263	55.0396	21.0721	7.57304	1.74687
43.32	158.599	143.476	133.34	55.1873	21.1205	7.58945	1.7539
43.42	158.572	143.458	133.412	55.324	21.1619	7.60273	1.75
43.52	158.525	143.446	133.515	55.4693	21.2127	7.61992	1.7664
43.62	158.482	143.433	133.581	55.617	21.2635	7.63007	1.775
43.72	158.433	143.41	133.66	55.7592	21.3221	7.6496	1.78124
43.82	158.385	143.419	133.722	55.8881	21.3596	7.65976	1.77499
43.92	158.339	143.409	133.803	56.0092	21.4057	7.67226	1.775
44.02	158.273	143.407	133.869	56.1381	21.451	7.68945	1.78671
44.12	158.195	143.374	133.921	56.2654	21.4768	7.69023	1.78281
44.22	158.113	143.343	133.986	56.392	21.519	7.69882	1.78281
44.32	158.023	143.306	134.058	56.5186	21.5447	7.71757	1.79219
44.42	157.925	143.286	134.118	56.6357	21.5697	7.72929	1.78906
44.52	157.845	143.245	134.163	56.7693	21.5901	7.73007	1.77266
44.62	157.747	143.223	134.19	56.874	21.644	7.7332	1.775
44.72	157.656	143.184	134.243	57.0068	21.6776	7.75663	1.77499
44.82	157.558	143.148	134.301	57.1271	21.7127	7.76913	1.78515
44.92	157.462	143.104	134.348	57.249	21.7377	7.78633	1.77031
45.02	157.338	143.078	134.401	57.4021	21.7916	7.79023	1.77734
45.12	157.261	143.042	134.464	57.5381	21.8432	7.8082	1.79062
45.22	157.152	142.968	134.511	57.6381	21.8479	7.79961	1.75938
45.32	157.061	142.921	134.527	57.7795	21.8924	7.82382	1.74609
45.42	156.988	142.857	134.562	57.9092	21.9291	7.8582	1.76484
45.52	156.9	142.799	134.616	58.0287	21.9627	7.86054	1.75547
45.62	156.816	142.738	134.659	58.1592	22.0096	7.88789	1.76094
45.72	156.703	142.681	134.672	58.2709	22.0487	7.90898	1.75391
45.82	156.621	142.632	134.716	58.392	22.0744	7.91992	1.74765
45.92	156.532	142.554	134.755	58.5092	22.1322	7.94257	1.75547
46.02	156.453	142.491	134.806	58.6287	22.1737	7.95976	1.75156
46.12	156.363	142.413	134.833	58.7389	22.1987	7.96367	1.73516
46.22	156.265	142.372	134.87	58.8451	22.226	7.97773	1.74218
46.32	156.178	142.31	134.892	58.9764	22.2658	7.9957	1.74375
46.42	156.093	142.252	134.914	59.099	22.3026	8.01132	1.74375
46.52	155.998	142.2	134.931	59.2162	22.3362	8.03007	1.73984
46.62	155.9	142.131	134.965	59.3373	22.3807	8.04804	1.73046
46.72	155.802	142.063	134.997	59.4467	22.419	8.08086	1.72344
46.82	155.739	142.02	135.049	59.5678	22.469	8.10742	1.73202
46.92	155.658	141.95	135.064	59.7061	22.5174	8.12773	1.73046
47.02	155.581	141.902	135.09	59.8076	22.5682	8.15117	1.73125
47.12	155.508	141.853	135.121	59.9553	22.619	8.17695	1.74062
47.22	155.45	141.816	135.142	60.0873	22.6682	8.19647	1.7414
47.32	155.363	141.745	135.154	60.1982	22.6932	8.20664	1.74375
47.42	155.282	141.705	135.173	60.3006	22.7322	8.21445	1.74453
47.52	155.214	141.665	135.206	60.4326	22.794	8.24492	1.7664
47.62	155.161	141.601	135.23	60.5467	22.8283	8.26835	1.76094
47.72	155.107	141.564	135.246	60.6521	22.8596	8.27929	1.76406
47.82	155.056	141.527	135.274	60.7936	22.9057	8.30351	1.7664
47.92	155	141.482	135.293	60.9256	22.9354	8.31757	1.75
48.02	154.941	141.443	135.312	61.0311	22.9588	8.33945	1.7539
48.12	154.877	141.413	135.333	61.1498	23.0002	8.36992	1.76094
48.22	154.794	141.359	135.344	61.2506	23.0244	8.36211	1.75703
48.32	154.718	141.327	135.349	61.3686	23.058	8.38632	1.76171
48.42	154.641	141.295	135.375	61.4982	23.0807	8.39413	1.76328
48.52	154.593	141.241	135.383	61.6084	23.1205	8.41132	1.75
48.62	154.509	141.185	135.411	61.7084	23.1487	8.42851	1.75312
48.72	154.432	141.154	135.414	61.8084	23.1815	8.44101	1.75781
48.82	154.367	141.105	135.44	61.9389	23.2205	8.46992	1.76484
48.92	154.294	141.046	135.435	62.0209	23.2518	8.47226	1.74765
49.02	154.203	140.998	135.445	62.1225	23.2729	8.4832	1.7539
49.12	154.146	140.946	135.456	62.2318	23.3026	8.4832	1.73516
49.22	154.09	140.916	135.465	62.3514	23.344	8.50897	1.7539
49.32	154.043	140.878	135.476	62.4834	23.3838	8.52461	1.76327
49.42	153.98	140.843	135.482	62.5772	23.4182	8.55742	1.76328
49.52	153.916	140.797	135.484	62.6795	23.4393	8.56835	1.77734
49.62	153.853	140.757	135.486	62.7826	23.4744	8.57539	1.78437
49.72	153.791	140.708	135.497	62.892	23.5197	8.58085	1.775
49.82	153.704	140.656	135.497	63.0053	23.5487	8.58164	1.77734
49.92	153.682	140.624	135.513	63.1303	23.6033	8.60273	1.78672
50.02	153.634	140.569	135.515	63.2607	23.6416	8.62383	1.79609
50.12	153.6	140.541	135.525	63.3764	23.6799	8.6496	1.81406
50.22	153.561	140.502	135.533	63.4779	23.7307	8.66913	1.81405
50.32	153.513	140.452	135.533	63.5678	23.7612	8.67929	1.82578
50.42	153.455	140.396	135.525	63.6811	23.7924	8.69414	1.83593
50.52	153.431	140.377	135.54	63.806	23.8283	8.71992	1.85468
50.62	153.381	140.323	135.54	63.8959	23.8783	8.7371	1.85312
50.72	153.343	140.267	135.543	64.0178	23.901	8.74804	1.85312
50.82	153.324	140.235	135.554	64.1318	23.9447	8.77226	1.85468
50.92	153.299	140.177	135.539	64.2381	23.9807	8.77695	1.86171
51.02	153.273	140.152	135.543	64.3568	24.019	8.79023	1.87265
51.12	153.228	140.122	135.542	64.46	24.0604	8.80898	1.88594
51.22	153.188	140.08	135.543	64.5896	24.1111	8.81991	1.89452
51.32	153.163	140.036	135.546	64.6904	24.144	8.82929	1.90703
51.42	153.141	140.005	135.543	64.8318	24.2018	8.84101	1.91249
51.52	153.113	139.988	135.554	64.9529	24.2322	8.86132	1.92968
51.62	153.101	139.979	135.554	65.0787	24.2846	8.87929	1.94844
51.72	153.078	139.952	135.544	65.1912	24.3197	8.89179	1.94453
51.82	153.043	139.918	135.535	65.2982	24.3424	8.90195	1.94531
51.92	153.031	139.907	135.534	65.3896	24.3744	8.93007	1.95469
52.02	153.005	139.861	135.533	65.4857	24.4291	8.93711	1.9664
52.12	152.95	139.838	135.518	65.5701	24.4533	8.95273	1.96875
52.22	152.915	139.796	135.525	65.6693	24.5002	8.97929	1.99531
52.32	152.861	139.748	135.517	65.7709	24.5252	8.96836	1.98594
52.42	152.841	139.733	135.501	65.8818	24.5518	8.98086	1.99297
52.52	152.816	139.693	135.501	65.9779	24.5799	8.98945	1.98984
52.62	152.779	139.666	135.49	66.0584	24.6135	8.99804	2.00234
52.72	152.771	139.655	135.487	66.1693	24.6486	9.01054	2.00546
52.82	152.752	139.615	135.484	66.2498	24.6854	9.02304	2.01718
52.92	152.724	139.595	135.465	66.3295	24.701	9.03632	2.0039
53.02	152.7	139.575	135.456	66.4271	24.7315	9.03398	2.00703
53.12	152.675	139.552	135.452	66.5404	24.7658	9.0457	2.01094
53.22	152.658	139.556	135.453	66.6693	24.7815	9.05038	2.01562
53.32	152.635	139.554	135.443	66.767	24.8197	9.06601	2.03124
53.42	152.612	139.522	135.433	66.8818	24.851	9.06914	2.02422
53.52	152.592	139.5	135.416	66.9709	24.8815	9.07382	2.02734
53.62	152.57	139.484	135.427	67.0717	24.9237	9.10039	2.03515
53.72	152.54	139.452	135.405	67.1748	24.9541	9.1082	2.03828
53.82	152.521	139.448	135.406	67.2709	24.9924	9.11054	2.04687
53.92	152.507	139.431	135.397	67.3686	25.0291	9.12851	2.06562
54.02	152.503	139.416	135.396	67.4857	25.0565	9.13789	2.06015
54.12	152.5	139.391	135.394	67.5912	25.1018	9.15742	2.08125
54.22	152.471	139.375	135.386	67.6912	25.1346	9.15585	2.07265
54.32	152.474	139.368	135.386	67.7904	25.1674	9.17461	2.07734
54.42	152.457	139.355	135.384	67.8584	25.2104	9.19023	2.08125
54.52	152.451	139.338	135.367	67.9334	25.2408	9.19101	2.08593
54.62	152.45	139.337	135.366	68.0225	25.2627	9.21211	2.09531
54.72	152.436	139.331	135.366	68.1107	25.2971	9.21991	2.10468
54.82	152.424	139.313	135.351	68.1889	25.3221	9.23163	2.09765
54.92	152.428	139.295	135.362	68.2686	25.3612	9.23945	2.11641
55.02	152.4	139.281	135.343	68.3396	25.3807	9.25117	2.12343
55.12	152.396	139.273	135.344	68.4256	25.4237	9.24882	2.12422
55.22	152.371	139.269	135.349	68.5248	25.4533	9.26132	2.11875
55.32	152.367	139.273	135.347	68.6107	25.4916	9.28007	2.14608
55.42	152.361	139.264	135.347	68.6717	25.5158	9.28085	2.15625
55.52	152.347	139.256	135.339	68.7842	25.5502	9.31133	2.16718
55.62	152.32	139.253	135.333	68.8779	25.5721	9.32773	2.17187
55.72	152.308	139.244	135.328	68.9475	25.5916	9.34335	2.17968
55.82	152.302	139.245	135.329	69.0342	25.6307	9.35195	2.19062
55.92	152.296	139.241	135.322	69.1107	25.6541	9.36054	2.19453
56.02	152.279	139.236	135.304	69.2084	25.6815	9.36913	2.19531
56.12	152.264	139.22	135.29	69.2982	25.6994	9.38007	2.20469
56.22	152.251	139.196	135.284	69.3686	25.7119	9.39101	2.20391
56.32	152.248	139.205	135.273	69.449	25.7401	9.40038	2.21483
56.42	152.25	139.188	135.271	69.5381	25.7658	9.42304	2.22422
56.52	152.232	139.174	135.242	69.6326	25.7932	9.43085	2.22499
56.62	152.232	139.177	135.247	69.71	25.833	9.44414	2.2375
56.72	152.218	139.171	135.243	69.8037	25.8494	9.45585	2.24374
56.82	152.199	139.166	135.234	69.8787	25.8815	9.46054	2.24375
56.92	152.169	139.163	135.226	69.9779	25.9057	9.48945	2.25703
57.02	152.139	139.146	135.226	70.0701	25.9416	9.50351	2.26405
57.12	152.128	139.136	135.204	70.167	25.9822	9.5207	2.275
57.22	152.101	139.116	135.189	70.2318	26.0151	9.53398	2.2789
57.32	152.071	139.106	135.179	70.3311	26.0408	9.54023	2.28593
57.42	152.029	139.103	135.169	70.4084	26.0744	9.55429	2.28515
57.52	151.994	139.085	135.154	70.4818	26.0932	9.56367	2.28672
57.62	151.971	139.086	135.154	70.5639	26.133	9.59335	2.31484
57.72	151.943	139.084	135.155	70.6592	26.1736	9.62148	2.31952
57.82	151.91	139.056	135.142	70.7162	26.1908	9.63007	2.32343
57.92	151.861	139.043	135.125	70.8084	26.2033	9.64023	2.3164
58.02	151.824	139.016	135.118	70.8709	26.2533	9.66523	2.32733
58.12	151.782	139.002	135.104	70.9701	26.2987	9.70039	2.3414
58.22	151.738	138.966	135.079	71.0287	26.3283	9.70664	2.3414
58.32	151.703	138.96	135.056	71.1123	26.3432	9.71132	2.35469
58.42	151.658	138.955	135.047	71.1912	26.3807	9.72226	2.36328
58.52	151.631	138.941	135.045	71.2615	26.401	9.74179	2.37343
58.62	151.583	138.915	135.033	71.3217	26.4354	9.75273	2.37656
58.72	151.554	138.888	135.02	71.4068	26.4541	9.75273	2.37578
58.82	151.507	138.863	134.993	71.4779	26.4783	9.75742	2.37109
58.92	151.471	138.852	134.992	71.5506	26.5041	9.76132	2.36484
59.02	151.443	138.835	134.976	71.599	26.5315	9.78242	2.36484
59.12	151.423	138.81	134.957	71.6693	26.5502	9.80195	2.36328
59.22	151.402	138.798	134.952	71.7217	26.5737	9.81523	2.35625
59.32	151.39	138.784	134.944	71.7787	26.6072	9.83867	2.36484
59.42	151.349	138.759	134.922	71.8256	26.619	9.8371	2.36484
59.52	151.332	138.73	134.908	71.8811	26.6502	9.8496	2.37499
59.62	151.32	138.714	134.894	71.9701	26.6799	9.86054	2.38281
59.72	151.293	138.702	134.886	72.042	26.6932	9.86992	2.38594
59.82	151.29	138.683	134.874	72.1006	26.7221	9.86211	2.38594
59.92	151.264	138.654	134.854	72.1365	26.7283	9.87851	2.38281
60.02	151.26	138.638	134.841	72.2068	26.7596	9.88632	2.38984
60.12	151.242	138.615	134.824	72.3006	26.7932	9.90195	2.39296
60.22	151.222	138.606	134.818	72.3701	26.8221	9.91288	2.39765
60.32	151.228	138.601	134.806	72.4295	26.8471	9.93632	2.39999
60.42	151.219	138.57	134.808	72.5115	26.8713	9.92929	2.39219
60.52	151.216	138.55	134.805	72.5826	26.8979	9.95195	2.4039
60.62	151.203	138.534	134.785	72.6576	26.9119	9.95664	2.39375
60.72	151.201	138.503	134.767	72.7084	26.9408	9.9621	2.38281
60.82	151.195	138.494	134.768	72.7615	26.9518	9.9621	2.37656
60.92	151.193	138.482	134.768	72.8412	26.9721	9.97382	2.38047
61.02	151.193	138.464	134.758	72.9217	26.9807	9.98164	2.36484
61.12	151.182	138.445	134.736	73.0131	26.9916	9.97929	2.37265
61.22	151.181	138.433	134.72	73.0732	27.0119	9.98164	2.35469
61.32	151.171	138.415	134.708	73.142	27.0127	9.97929	2.33516
61.42	151.178	138.413	134.705	73.2303	27.0408	9.9996	2.35546
61.52	151.168	138.407	134.703	73.2982	27.0588	10.0269	2.36093
61.62	151.161	138.402	134.698	73.3521	27.0697	10.0223	2.34453
61.72	151.18	138.392	134.704	73.449	27.0799	10.048	2.34999
61.82	151.189	138.382	134.701	73.517	27.1096	10.0598	2.35312
61.92	151.189	138.373	134.683	73.5803	27.1229	10.0684	2.35156
62.02	151.201	138.374	134.676	73.6717	27.1424	10.0715	2.35702
62.12	151.2	138.361	134.655	73.7318	27.1604	10.0848	2.35469
62.22	151.203	138.337	134.646	73.792	27.1752	10.0926	2.35312
62.32	151.218	138.343	134.643	73.8701	27.1987	10.1051	2.35078
62.42	151.199	138.335	134.613	73.9389	27.201	10.1027	2.32969
62.52	151.203	138.326	134.605	73.9803	27.2182	10.1105	2.31172
62.62	151.221	138.335	134.597	74.0522	27.219	10.1105	2.3125
62.72	151.243	138.335	134.574	74.1107	27.2322	10.1199	2.30391
62.82	151.25	138.323	134.564	74.1693	27.2494	10.1129	2.29296
62.92	151.252	138.314	134.544	74.2201	27.258	10.1199	2.29219
63.02	151.261	138.326	134.515	74.2826	27.269	10.1184	2.29296
63.12	151.264	138.326	134.506	74.3123	27.2854	10.1324	2.28672
63.22	151.271	138.325	134.493	74.3607	27.301	10.1402	2.27344
63.32	151.278	138.325	134.468	74.4131	27.3158	10.1434	2.26641
63.42	151.299	138.332	134.462	74.4779	27.3393	10.159	2.27266
63.52	151.311	138.334	134.447	74.5232	27.3518	10.1598	2.26406
63.62	151.32	138.343	134.448	74.56	27.3729	10.1809	2.27266
63.72	151.321	138.347	134.433	74.6107	27.3924	10.1809	2.26328
63.82	151.337	138.352	134.426	74.6514	27.4135	10.1887	2.26094
63.92	151.346	138.361	134.424	74.7107	27.4393	10.2004	2.26406
64.02	151.35	138.363	134.417	74.7607	27.451	10.1926	2.25468
64.12	151.359	138.363	134.406	74.7904	27.469	10.2043	2.23594
64.22	151.372	138.37	134.401	74.8506	27.4838	10.2137	2.23593
64.32	151.381	138.387	134.398	74.9217	27.5096	10.2223	2.24218
64.42	151.389	138.394	134.394	74.9779	27.5096	10.2394	2.22187
64.52	151.41	138.394	134.372	75.017	27.5393	10.2394	2.21093
64.62	151.414	138.398	134.357	75.0701	27.5549	10.2512	2.20469
64.72	151.441	138.417	134.347	75.1107	27.5697	10.259	2.21483
64.82	151.453	138.448	134.336	75.1709	27.5854	10.2723	2.21015
64.92	151.468	138.464	134.326	75.2475	27.619	10.2769	2.21406
65.02	151.47	138.466	134.324	75.2865	27.6307	10.2707	2.21016
65.12	151.488	138.473	134.304	75.3295	27.6487	10.2785	2.19921
65.22	151.486	138.473	134.275	75.3576	27.6502	10.2691	2.19531
65.32	151.507	138.505	134.273	75.417	27.6619	10.2902	2.20234
65.42	151.51	138.523	134.276	75.4779	27.6815	10.2902	2.1914
65.52	151.527	138.524	134.261	75.517	27.701	10.3019	2.18281
65.62	151.54	138.552	134.268	75.5787	27.7221	10.3113	2.17344
65.72	151.55	138.555	134.251	75.6186	27.7385	10.3215	2.17109
65.82	151.561	138.586	134.236	75.6873	27.7541	10.3238	2.16249
65.92	151.57	138.609	134.226	75.7397	27.7807	10.341	2.16328
66.02	151.593	138.645	134.216	75.7998	27.7924	10.3519	2.16484
66.12	151.607	138.652	134.204	75.8475	27.8127	10.3394	2.15078
66.22	151.627	138.685	134.189	75.9076	27.8393	10.3551	2.14999
66.32	151.628	138.696	134.177	75.9584	27.8416	10.3527	2.12656
66.42	151.644	138.707	134.178	76.01	27.8635	10.3629	2.12656
66.52	151.668	138.745	134.186	76.0639	27.8908	10.384	2.12265
66.62	151.681	138.749	134.177	76.1123	27.9057	10.3832	2.10859
66.72	151.699	138.786	134.177	76.167	27.9236	10.3801	2.12421
66.82	151.705	138.802	134.183	76.1889	27.9432	10.3801	2.12109
66.92	151.711	138.823	134.173	76.2279	27.9604	10.3902	2.1125
67.02	151.709	138.834	134.144	76.2498	27.9612	10.3824	2.09219
67.12	151.73	138.863	134.136	76.2982	27.9885	10.3918	2.10469
67.22	151.751	138.873	134.124	76.3295	28.0033	10.391	2.09687
67.32	151.768	138.905	134.115	76.3826	28.0291	10.4098	2.1039
67.42	151.782	138.929	134.116	76.4248	28.0463	10.4223	2.10625
67.52	151.803	138.966	134.101	76.4818	28.0744	10.4215	2.10546
67.62	151.82	138.994	134.115	76.5287	28.1018	10.4387	2.11328
67.72	151.841	138.997	134.098	76.5615	28.1049	10.4504	2.10625
67.82	151.861	139.037	134.093	76.6209	28.1307	10.4644	2.10546
67.92	151.881	139.066	134.096	76.6912	28.1565	10.4762	2.1289
68.02	151.892	139.064	134.087	76.7412	28.1752	10.4754	2.12812
68.12	151.92	139.093	134.087	76.7889	28.194	10.4894	2.13671
68.22	151.939	139.105	134.091	76.8279	28.2299	10.4879	2.14374
68.32	151.95	139.124	134.087	76.874	28.2533	10.4949	2.14375
68.42	151.964	139.13	134.085	76.9389	28.2791	10.5012	2.14843
68.52	151.978	139.142	134.084	76.9779	28.2916	10.5113	2.14453
68.62	152.007	139.17	134.083	77.0209	28.3002	10.5184	2.16562
68.72	152.021	139.177	134.071	77.0615	28.3018	10.5145	2.15938
68.82	152.039	139.201	134.065	77.1209	28.3244	10.5293	2.16562
68.92	152.05	139.202	134.052	77.1521	28.3401	10.5324	2.1539
69.02	152.06	139.21	134.048	77.2139	28.3549	10.534	2.1539
69.12	152.088	139.228	134.047	77.2615	28.3807	10.548	2.16406
69.22	152.109	139.241	134.034	77.3021	28.4002	10.548	2.17343
69.32	152.131	139.262	134.023	77.3514	28.4127	10.5621	2.18515
69.42	152.161	139.284	134.029	77.4068	28.4447	10.5715	2.18672
69.52	152.179	139.298	134.034	77.4584	28.4627	10.5832	2.1914
69.62	152.199	139.314	134.026	77.4904	28.4822	10.591	2.1875
69.72	152.22	139.342	134.026	77.5357	28.5033	10.6043	2.19609
69.82	152.234	139.359	134.013	77.5873	28.5213	10.6105	2.20468
69.92	152.24	139.379	134.017	77.6209	28.5432	10.6207	2.20703
70.02	152.268	139.4	134.015	77.6693	28.5604	10.6394	2.22265
70.12	152.271	139.415	134.007	77.7021	28.5721	10.6301	2.21797
70.22	152.3	139.443	133.997	77.7303	28.5916	10.6379	2.23827
70.32	152.32	139.47	133.992	77.7904	28.6112	10.6496	2.24531
70.42	152.339	139.48	133.984	77.8201	28.6252	10.6519	2.24609
70.52	152.359	139.505	133.99	77.8842	28.644	10.6691	2.25702
70.62	152.364	139.527	133.987	77.9389	28.6596	10.6809	2.26328
70.72	152.378	139.531	133.984	77.9701	28.6682	10.6809	2.26328
70.82	152.408	139.551	133.976	78.0115	28.6838	10.6926	2.26562
70.92	152.428	139.585	133.968	78.06	28.7049	10.7004	2.28437
71.02	152.441	139.605	133.965	78.0928	28.7244	10.7004	2.27343
71.12	152.458	139.623	133.954	78.1303	28.7299	10.7105	2.26719
71.22	152.467	139.636	133.948	78.1834	28.7401	10.7121	2.275
71.32	152.471	139.666	133.944	78.2217	28.7518	10.7113	2.27656
71.42	152.488	139.683	133.922	78.2709	28.7596	10.7082	2.28281
71.52	152.519	139.715	133.939	78.324	28.7971	10.734	2.30624
71.62	152.518	139.745	133.937	78.3607	28.8143	10.7512	2.30625
71.72	152.528	139.765	133.931	78.4037	28.8315	10.7512	2.30625
71.82	152.537	139.784	133.935	78.4404	28.8416	10.7613	2.30625
71.92	152.543	139.795	133.919	78.4701	28.8518	10.7551	2.30625
72.02	152.556	139.823	133.931	78.5193	28.8729	10.7746	2.31249
72.12	152.558	139.842	133.915	78.5732	28.8838	10.784	2.31953
72.22	152.576	139.858	133.911	78.617	28.8854	10.7887	2.32421
72.32	152.581	139.876	133.896	78.6436	28.8862	10.7957	2.31719
72.42	152.586	139.899	133.896	78.6889	28.9096	10.7996	2.3164
72.52	152.605	139.908	133.902	78.7279	28.908	10.7902	2.32578
72.62	152.627	139.933	133.905	78.7787	28.9432	10.8098	2.34531
72.72	152.64	139.952	133.904	78.81	28.9487	10.8098	2.34297
72.82	152.657	139.98	133.89	78.8568	28.9666	10.8293	2.3414
72.92	152.656	139.998	133.88	78.8959	28.9768	10.8293	2.33984
73.02	152.668	140.011	133.876	78.9295	28.9924	10.8293	2.33593
73.12	152.674	140.041	133.88	78.9779	29.0096	10.8371	2.34297
73.22	152.679	140.052	133.861	79.0209	29.019	10.8473	2.33125
73.32	152.696	140.063	133.844	79.06	29.0197	10.841	2.32031
73.42	152.717	140.095	133.854	79.1029	29.033	10.8504	2.32578
73.52	152.72	140.101	133.844	79.1303	29.0502	10.841	2.32344
73.62	152.718	140.105	133.833	79.1709	29.0526	10.8488	2.32578
73.72	152.736	140.136	133.824	79.2264	29.0666	10.8551	2.33202
73.82	152.737	140.14	133.825	79.249	29.083	10.8621	2.32734
73.92	152.744	140.157	133.818	79.2748	29.0877	10.8684	2.33359
74.02	152.743	140.166	133.801	79.3178	29.0994	10.8777	2.33125
74.12	152.743	140.177	133.804	79.3568	29.119	10.8684	2.32187
74.22	152.74	140.185	133.79	79.3881	29.1252	10.8762	2.32187
74.32	152.743	140.198	133.769	79.4272	29.1362	10.8746	2.32187
74.42	152.734	140.216	133.771	79.4662	29.1385	10.8684	2.32187
74.52	152.758	140.24	133.767	79.5092	29.1721	10.8957	2.33202
74.62	152.769	140.251	133.763	79.535	29.1987	10.9098	2.32578
74.72	152.781	140.259	133.746	79.5717	29.1994	10.909	2.32578
74.82	152.789	140.273	133.732	79.599	29.201	10.8996	2.32578
74.92	152.794	140.298	133.722	79.6357	29.226	10.9191	2.33203
75.02	152.796	140.309	133.708	79.6654	29.2268	10.9191	2.32578
75.12	152.803	140.316	133.703	79.6967	29.2401	10.9269	2.32578
75.22	152.794	140.318	133.681	79.7264	29.2494	10.9269	2.33359
75.32	152.796	140.331	133.674	79.7615	29.2604	10.941	2.33359
75.42	152.795	140.347	133.675	79.7904	29.2807	10.9504	2.33359
75.52	152.802	140.351	133.663	79.8209	29.2846	10.9496	2.33515
75.62	152.816	140.366	133.65	79.8451	29.2963	10.9543	2.33906
75.72	152.828	140.369	133.635	79.8764	29.3088	10.9566	2.33203
75.82	152.838	140.384	133.646	79.9193	29.3401	10.9777	2.35155
75.92	152.839	140.391	133.636	79.9389	29.3408	10.991	2.34687
76.02	152.846	140.398	133.613	79.9764	29.3479	10.9957	2.35156
76.12	152.839	140.403	133.598	79.9889	29.3612	10.991	2.34453
76.22	152.837	140.411	133.579	80.017	29.3705	11.009	2.33984
76.32	152.838	140.42	133.576	80.0584	29.3713	11.0113	2.33593
76.42	152.857	140.443	133.589	80.0975	29.4104	11.0324	2.36875
76.52	152.861	140.452	133.574	80.1225	29.4018	11.0387	2.36641
76.62	152.851	140.443	133.564	80.1537	29.4041	11.0324	2.35703
76.72	152.853	140.455	133.546	80.1725	29.4119	11.0434	2.35859
76.82	152.864	140.476	133.54	80.2045	29.4291	11.048	2.37265
76.92	152.861	140.476	133.523	80.2279	29.4393	11.048	2.37109
77.02	152.857	140.473	133.517	80.2561	29.4612	11.0566	2.36718
77.12	152.878	140.491	133.513	80.2904	29.4682	11.0598	2.37656
77.22	152.876	140.481	133.496	80.31	29.4768	11.0598	2.37422
77.32	152.867	140.489	133.487	80.3428	29.4838	11.073	2.3664
77.42	152.878	140.5	133.474	80.3709	29.4979	11.0793	2.38124
77.52	152.878	140.519	133.47	80.4115	29.5096	11.0793	2.37655
77.62	152.885	140.52	133.451	80.4193	29.5197	11.0793	2.38437
77.72	152.878	140.517	133.436	80.4529	29.5213	11.0879	2.38437
77.82	152.88	140.531	133.436	80.4717	29.5408	11.0926	2.38593
77.92	152.896	140.546	133.425	80.4975	29.5502	11.1082	2.40156
78.02	152.89	140.548	133.424	80.5311	29.5432	11.1012	2.39453
78.12	152.892	140.559	133.425	80.5615	29.5721	11.1223	2.40547
78.22	152.903	140.566	133.413	80.5967	29.5697	11.1223	2.41015
78.32	152.893	140.559	133.402	80.6068	29.5682	11.1277	2.4039
78.42	152.889	140.568	133.394	80.6287	29.5799	11.1324	2.41406
78.52	152.896	140.58	133.386	80.6576	29.5916	11.1394	2.42343
78.62	152.885	140.589	133.366	80.6772	29.5994	11.1363	2.42344
78.72	152.892	140.593	133.354	80.7021	29.619	11.1316	2.42266
78.82	152.898	140.609	133.344	80.7279	29.619	11.1496	2.41796
78.92	152.898	140.599	133.337	80.7498	29.633	11.1598	2.41562
79.02	152.908	140.613	133.326	80.7811	29.6502	11.1691	2.43202
79.12	152.918	140.63	133.327	80.8115	29.6619	11.1824	2.44844
79.22	152.918	140.628	133.318	80.8373	29.6697	11.1949	2.45468
79.32	152.929	140.631	133.302	80.8568	29.6697	11.1887	2.45469
79.42	152.918	140.642	133.285	80.8709	29.6815	11.2027	2.45703
79.52	152.927	140.64	133.276	80.9076	29.6932	11.2098	2.47577
79.62	152.916	140.641	133.254	80.9193	29.701	11.2121	2.4664
79.72	152.911	140.649	133.257	80.9521	29.701	11.2199	2.47422
79.82	152.915	140.655	133.234	80.9779	29.7127	11.2199	2.47421
79.92	152.906	140.648	133.232	80.9975	29.7182	11.2293	2.47187
80.02	152.914	140.65	133.207	81.0193	29.7229	11.2285	2.46484
80.12	152.915	140.662	133.194	81.0482	29.7322	11.2316	2.47656
80.22	152.906	140.671	133.183	81.0678	29.7377	11.2434	2.48359
80.32	152.896	140.652	133.177	81.0795	29.7322	11.2332	2.47813
80.42	152.892	140.655	133.161	81.1029	29.7338	11.2332	2.47969
80.52	152.898	140.67	133.156	81.1326	29.7526	11.2394	2.49608
80.62	152.906	140.679	133.134	81.1709	29.7612	11.2473	2.50078
80.72	152.878	140.67	133.107	81.1834	29.7619	11.2223	2.4711
80.82	152.88	140.675	133.115	81.2139	29.7705	11.2309	2.47577
80.92	152.884	140.679	133.105	81.2373	29.7776	11.2355	2.48203
81.02	152.873	140.68	133.091	81.2592	29.7791	11.2457	2.49141
81.12	152.869	140.691	133.076	81.2811	29.7932	11.2418	2.48281
81.22	152.876	140.698	133.072	81.31	29.8104	11.2512	2.48593
81.32	152.865	140.7	133.054	81.3373	29.8197	11.2629	2.48359
81.42	152.847	140.689	133.036	81.3592	29.8127	11.259	2.46484
81.52	152.859	140.698	133.052	81.3998	29.8299	11.259	2.47421
81.62	152.857	140.701	133.033	81.4193	29.8283	11.2574	2.47422
81.72	152.85	140.712	133.025	81.4404	29.8408	11.2644	2.47422
81.82	152.839	140.698	133.025	81.4779	29.8299	11.2605	2.46406
81.92	152.839	140.7	133.013	81.4873	29.8416	11.259	2.45469
82.02	152.84	140.701	132.997	81.5193	29.8518	11.259	2.45703
82.12	152.829	140.701	132.982	81.5365	29.8596	11.2473	2.45469
82.22	152.818	140.698	132.972	81.5561	29.8612	11.2574	2.45469
82.32	152.816	140.7	132.976	81.5873	29.8627	11.2527	2.45625
82.42	152.808	140.7	132.972	81.6186	29.8783	11.2668	2.46093
82.52	152.798	140.701	132.953	81.6303	29.8729	11.2566	2.44688
82.62	152.787	140.698	132.962	81.6475	29.8807	11.259	2.44453
82.72	152.783	140.703	132.945	81.6795	29.8924	11.2598	2.43749
82.82	152.778	140.716	132.954	81.7186	29.8987	11.2746	2.44687
82.92	152.769	140.712	132.939	81.7451	29.9033	11.2762	2.45625
83.02	152.767	140.72	132.944	81.7709	29.8987	11.2902	2.46015
83.12	152.734	140.722	132.922	81.7787	29.8908	11.2785	2.43984
83.22	152.734	140.726	132.931	81.8061	29.9096	11.2785	2.44296
83.32	152.734	140.726	132.926	81.8279	29.9119	11.2887	2.44297
83.42	152.725	140.718	132.913	81.8467	29.9182	11.2801	2.45469
83.52	152.718	140.72	132.911	81.8686	29.9213	11.2785	2.45469
83.62	152.718	140.718	132.902	81.8982	29.9197	11.2785	2.45469
83.72	152.718	140.72	132.905	81.9107	29.9315	11.2918	2.45391
83.82	152.695	140.712	132.892	81.9272	29.9408	11.2887	2.45078
83.92	152.688	140.709	132.875	81.9584	29.9416	11.2848	2.45312
84.02	152.679	140.709	132.874	81.9647	29.9471	11.2801	2.45078
84.12	152.682	140.713	132.875	81.9896	29.9455	11.2809	2.45156
84.22	152.679	140.71	132.872	82.0287	29.9627	11.2902	2.4664
84.32	152.679	140.712	132.872	82.0467	29.9799	11.2879	2.4664
84.42	152.669	140.706	132.872	82.0717	29.969	11.2902	2.4664
84.52	152.66	140.702	132.854	82.1021	29.976	11.2902	2.46562
84.62	152.638	140.718	132.861	82.117	29.9994	11.2902	2.47422
84.72	152.611	140.701	132.843	82.1225	29.9924	11.2848	2.46875
84.82	152.609	140.704	132.854	82.1436	30.0135	11.3012	2.47812
84.92	152.587	140.701	132.844	82.1576	30.0135	11.2863	2.4664
85.02	152.561	140.701	132.855	82.1967	30.0237	11.2871	2.4664
85.12	152.558	140.712	132.853	82.2264	30.0424	11.3019	2.4664
85.22	152.556	140.712	132.854	82.2412	30.0401	11.3035	2.46797
85.32	152.541	140.709	132.855	82.2811	30.0494	11.3098	2.47655
85.42	152.539	140.71	132.853	82.3076	30.0721	11.3098	2.48437
85.52	152.525	140.701	132.841	82.3061	30.0721	11.3098	2.46641
85.62	152.51	140.713	132.847	82.3396	30.0901	11.3238	2.48046
85.72	152.521	140.725	132.847	82.3686	30.1049	11.341	2.4914
85.82	152.516	140.728	132.843	82.4021	30.1252	11.341	2.50546
85.92	152.513	140.731	132.847	82.4303	30.1416	11.3426	2.50469
86.02	152.51	140.74	132.855	82.449	30.1604	11.3434	2.5039
86.12	152.509	140.752	132.853	82.4779	30.1815	11.3527	2.51171
86.22	152.489	140.751	132.852	82.4975	30.201	11.3543	2.50703
86.32	152.49	140.752	132.854	82.5209	30.201	11.3691	2.5078
86.42	152.488	140.752	132.864	82.542	30.2221	11.3715	2.50469
86.52	152.471	140.759	132.854	82.5701	30.2408	11.3684	2.5039
86.62	152.468	140.759	132.867	82.6014	30.2518	11.3691	2.5039
86.72	152.45	140.763	132.876	82.6318	30.2533	11.3738	2.51327
86.82	152.455	140.759	132.861	82.6561	30.269	11.3777	2.51328
86.92	152.443	140.771	132.865	82.6717	30.2682	11.3848	2.51953
87.02	152.439	140.783	132.884	82.6982	30.283	11.4012	2.54452
87.12	152.435	140.791	132.886	82.7256	30.3135	11.4113	2.56719
87.22	152.418	140.781	132.883	82.7279	30.3205	11.4019	2.55703
87.32	152.398	140.792	132.88	82.7592	30.3416	11.4113	2.58515
87.42	152.378	140.781	132.865	82.7865	30.3494	11.409	2.5625
87.52	152.371	140.765	132.837	82.7889	30.3533	11.3902	2.54844
87.62	152.386	140.782	132.866	82.8232	30.3807	11.4129	2.57734
87.72	152.386	140.791	132.861	82.8514	30.4026	11.4191	2.58593
87.82	152.412	140.817	132.857	82.9037	30.4369	11.4348	2.5992
87.92	152.418	140.841	132.873	82.9412	30.4729	11.4605	2.61718
88.02	152.396	140.83	132.851	82.9818	30.4901	11.4676	2.61249
88.12	152.392	140.837	132.818	82.9936	30.5135	11.4605	2.59922
88.22	152.39	140.874	132.829	83.0053	30.5564	11.4855	2.61716
88.32	152.369	140.888	132.824	83.031	30.6119	11.5309	2.63435
88.42	152.384	140.915	132.827	83.0748	30.6635	11.577	2.67891
88.52	152.439	140.935	132.877	83.1271	30.6658	11.634	2.73043
88.62	152.457	140.972	132.896	83.1927	30.6893	11.6715	2.75547
[truncated: 6,018 more rows]

## Sheet: 3E
Time (s)	125	62.5	31.25	15.625	7.8125	3.90625	1.953125
[truncated: 7,506 more rows]

[truncated: 2 more sheets: 3F, 3G]
