# Supplementary material for: A point mutation in the nucleotide exchange factor eIF2B constitutively activates the integrated stress response by allosteric modulation
Source: eLife. 2022 Apr 13;11:e76171. doi: 10.7554/eLife.76171 (PMC9132573; doi:10.7554/eLife.76171)
Supplement: Figure 6—figure supplement 2—source data 1. — 7H9: homozygous βH160D clone (βH160D #1); H11, hemizygous βH160D clone (βH160D #2); Rep: replicate; Tub: anti-tubulin antibody; Puro: anti-puromycin antibody. [file elife-76171-fig6-figsupp2-data1.xlsx]

## Sheet: Sheet1
WT =WT
7H9 = bH160D #1
H11 = bH160D #2
puro
tubulin
