# Supplementary material for: A point mutation in the nucleotide exchange factor eIF2B constitutively activates the integrated stress response by allosteric modulation
Source: eLife. 2022 Apr 13;11:e76171. doi: 10.7554/eLife.76171 (PMC9132573; doi:10.7554/eLife.76171)
Supplement: Figure 6—figure supplement 3—source data 1. — 7H9: homozygous βH160D clone (βH160D #1); H11: hemizygous βH160D clone (βH160D #2); Rep: biological replicate. [file elife-76171-fig6-figsupp3-data1.xlsx]

## Sheet: 6-S3A
WT = WT
7H9 = bH160D #1
H11 = bH160D #2

## Sheet: 6-S3B
anti-phospho antibody				Phostag gel
WT	H160D #1	H160D #2		WT	H160D #1	H160D #2
REP 1	REP 2	REP 3		REP 1	REP 2	REP 3
88.91	65.52	78.41		0.11	0.048	0.095
111.09	97.97	90.76		0.14	0.135	0.17

## Sheet: 6-S3C
	Number of cells
day	WT			H160D			H160D + ISRIB
0	136400	95325	86025	87500	61600	82075	92750	97125	128625
4	861300	813450	1441000	358050	570900	445500	638550	425700	473550
6	6750000	3755000	5250000
8	12610000	13325000	16250000	2709000	2094000	4710000	2499000	4530000	2022000
