# Supplementary material for: A point mutation in the nucleotide exchange factor eIF2B constitutively activates the integrated stress response by allosteric modulation
Source: eLife. 2022 Apr 13;11:e76171. doi: 10.7554/eLife.76171 (PMC9132573; doi:10.7554/eLife.76171)
Supplement: Figure 6—source data 1. — Tg: thapsigargin; 7H9: homozygous βH160D clone (βH160D #1); H11: hemizygous βH160D clone (βH160D #2); Rep: biological replicate. [file elife-76171-fig6-data1.xlsx]

## Sheet: 6A
WT = WT
7H9 = bH160D #1
H11 = bH160D #2

## Sheet: 6B
	mRNA fold change (normalized to GAPDH mRNA and WT set to 1)
	WT			H160D #1			H160D #2
	rep 1	rep 2	rep 3	rep 1	rep 2	rep 3	rep 1	rep 2	rep 3
ATF4	1.01329	1.04646	0.94307	1.10798	1.10372	1.08576	1.15143	1.06868	1.00562
DDIT3	0.993	1.0776	0.9345	3.5598	4.0792	4.2124	1.7396	1.5942	1.694
ASNS	1.0678	1.0088	0.9284	1.5429	1.7205	1.7453	1.8769	1.7954	1.9353
CARS	1.05	1.014	0.94	1.48	1.426	1.307	1.303	1.185	1.346

## Sheet: 6C
	% total protein synthesis
	WT	H160D #1	H160D #2
rep 1	100	33.07	57.03
rep 2	100	64.06	82.21
rep 3	100	45.19	66.7

## Sheet: 6D
	Number of cells
Day	WT			H160D
	rep 1	rep 2	rep 3	rep 1	rep 2	rep 3
0	129000	105600	152400	81800	58600	35200
3	1284000	1434000	1319250	558000	681750	347250
5	6850000	5850000	5342500
7	20850000	27950000	17700000	3270000	2492500	3092500
9	70875000	74312500	107625000	6396500	6930000	7700000
